# Supplementary material for: Genomic analysis of 116 autism families strengthens known risk genes and highlights promising candidates
Source: Springer Nature journal article supplement (doi:10.1038/s41525-024-00411-1), 2024-03-22
Supplement: MOESM1 [file 41525_2024_411_MOESM1_ESM.pdf]

## ***Genomic analysis of 116 autism families strengthens known risk genes and highlights promising candidates***

Running title: Genomic analysis in Autism Spectrum Disorder

Marta Viggiano<sup>1,#</sup>, Fabiola Ceroni<sup>1,2#</sup>, Paola Visconti<sup>3</sup>, Annio Posar<sup>3,4</sup>, Maria Cristina Scaduto<sup>3</sup>, Laura Sandoni<sup>1</sup>, Irene Baravelli<sup>1</sup>, Cinzia Cameli<sup>1</sup>, Magali J. Rochat<sup>5</sup>, Alessandra Maresca<sup>6</sup>, Alessandro Vaisfeld<sup>7</sup>, Davide Gentilini<sup>8,9</sup>, Luciano Calzari<sup>9</sup>, Valerio Carelli<sup>6,4</sup>, Michael C Zody<sup>10</sup>, Elena Maestrini<sup>1,✉</sup>, Elena Bacchelli<sup>1,✉</sup>

1 Department of Pharmacy and Biotechnology, University of Bologna, Bologna, Italy.

2 Faculty of Health and Life Sciences, Oxford Brookes University, Oxford, UK.

3 IRCCS Istituto delle Scienze Neurologiche di Bologna, UOSI Disturbi dello Spettro Autistico, Bologna, Italy.

4 Department of Biomedical and Neuromotor Sciences, University of Bologna, Bologna, Italy.

5 IRCCS Istituto delle Scienze Neurologiche di Bologna, Functional and Molecular Neuroimaging Unit, Bologna, Italy.

6 IRCCS Istituto delle Scienze Neurologiche di Bologna, Programma di Neurogenetica, Bologna, Italy.

7 Department of Medical and Surgical Sciences, University of Bologna, Bologna, Italy.

8 Department of Brain and Behavioral Sciences, University of Pavia, Pavia, Italy.

9 Bioinformatics and Statistical Genomic Unit, IRCCS Istituto Auxologico Italiano, Milan, Italy.

10 New York Genome Center (NYGC), New York, NY, USA.

# These authors contributed equally to this work

✉ Correspondence:

- Elena Maestrini: [elena.maestrini@unibo.it](mailto:elena.maestrini@unibo.it)
- Elena Bacchelli: [elena.bacchelli@unibo.it](mailto:elena.bacchelli@unibo.it)

## The contents of supplementary materials

### Supplementary Data: Clinical description of probands with *BRSK2*, *SCN3A* and *NFIX* *de novo* variants

### Supplementary References

### Supplementary Figures:

- Supplementary Figure 1. Age of onset of first symptoms and age of diagnosis of ASD individuals, stratified by sex
- Supplementary Figure 2. Autism severity in the entire cohort of 144 probands and stratified by family type (SPX/MPX)
- Supplementary Figure 3. Score distribution of the Broad Autism Phenotype Questionnaire (BAPQ) in parents and the Social and Communication Disorders Checklist (SCDC) in the entire cohort
- Supplementary Figure 4. Analysis workflow
- Supplementary Figure 5. Genotype-computed ancestry of individuals included in this study
- Supplementary Figure 6. Rate of rare coding *de novo* and inherited pdSNVs in ASD individuals and unaffected siblings
- Supplementary Figure 7. Enrichment for *de novo* and inherited novel pdSNVs in SynGO Genes
- Supplementary Figure 8. Contribution of *de novo* and inherited novel pdSNVs to high confidence ASD/NDD genes.
- Supplementary Figure 9. *De novo* large duplication in Family 9
- Supplementary Figure 10. Multiple hits in families with CNVs in genomic disorders loci
- Supplementary Figure 11. PRS analysis.
- Supplementary Figure 12. *SCN3A* *de novo* stop-gain variant in Family 40
- Supplementary Figure 13. *HOMER1* deletion in Family 82
- Supplementary Figure 14. Facial photographs of probands with *BRSK2*, *SCN3A* and *NFIX* *de novo* variants

### Supplementary Tables:

- Supplementary Table 1. Summary of phenotype information for individuals with ASD
- Supplementary Table 2. Analysis of subclinical features using BAPQ and SCDC scores
- Supplementary Table 3. Distribution of rare *de novo* variants
- Supplementary Table 4. List of *de novo* pdSNVs identified in affected individuals (extended version of Table 1)
- Supplementary Table 5. Gene ontology from 17 genes carrying the 19 most severe *de novo* pdSNVs identified in 144 cases
- Supplementary Table 6. List of *de novo* and inherited pdSNVs in cases
- Supplementary Table 7. SynGO Gene Set Enrichment Analysis (GSEA) of genes carrying *de novo* and inherited pdSNVs in 144 cases

- Supplementary Table 8. List of high-confidence ASD/NDD genes
- Supplementary Table 9: Comorbidities of probands with pdSNVs in the list of 684 high-confidence ASD/NDD genes
- Supplementary Table 10: Rare genic CNVs in affected individuals and SLD siblings
- Supplementary Table 11: Rare homozygous and compound heterozygous pdSNVs
- Supplementary Table 12: Rare hemizygous pdSNVs

**Supplementary Data: Clinical description of probands with *BRSK2*, *SCN3A* and *NFIX* *de novo* variants**

**Proband 14.4**

The patient is an 11-year-old twin boy with ASD, diagnosed at 3 years of age. Dichorionic diamniotic pregnancy was complicated by threatened miscarriage since the end of the first trimester. Caesarean section was performed at 38 weeks. Birth weight was 2900 g.

After birth, the baby showed mild hypotonia and hypoglycemia, which gradually resolved in the first days of life. Motor milestones were only slightly delayed, and he walked unsupported at 18-20 months. Verbal skills were severely impaired: first words were reported at 2 years of age without any further improvement in the subsequent months. Due to poor eye contact, he was first referred to a child neurologist at the age of 2 years and got ASD diagnosis at the age of 3 years. Despite medical intervention, language improvements have not been reported until the age of 8-9 years, however in the last few years he acquired the ability to speak in short but clear sentences. Other remarkable findings included motor stereotypies, inability to cope with frustration, delayed fine motor skills and mild myopia (-2 D). No anomalies were detected at EEG, ECG and brain MRI.

He was born from healthy, non-consanguineous parents. His dizygotic twin brother (14.3) also has an ASD diagnosis, with poorer performances in speech fluency and autonomy in daily life activities. The remaining family history is unremarkable. Both brothers underwent CMA and *FMR1* genetic analyses, with no abnormalities detected. WGS identified a *de novo* *BRSK2* heterozygous variant (NP\_001243556.1:p.(Ala158Thr)) in patient 14.4, not shared with his twin brother.

On the last evaluation, at the age of 11 years and 2/12, height was 152 cm (85<sup>th</sup> percentile) and OFC 52 cm (20<sup>th</sup> percentile). His speech abilities were improved from the previous evaluation, although inadequate for his age, likewise for fine motor control. No major dysmorphisms were noted, however trigonocephaly, wide mouth with thick lips, bilateral broad hallux and a supernumerary right nipple, just below the normal one, were reported (Supplementary Figure 14a). At the time of our last examination, puberal development had just begun.

### **Proband 32.3**

The patient is a 10 years old boy with ASD, diagnosed at 3 years of age. He was born from healthy non consanguineous parents at 38 weeks after an uneventful pregnancy. Birth weight was 3850 g and neonatal parameters were normal.

Motor development was regular, he walked at age 13 months. At 18 months his parents noted a delay in verbal skills, poor eye contact and stereotyped behaviors, but only at 3 years he was diagnosed with ASD. His nonverbal IQ, evaluated at 4 years by Leiter-R test, was normal. Despite rehabilitation interventions he has important language problems (few single words). Maternal and paternal family history is positive for language disorders. Other remarkable findings included motor stereotypies, frustration intolerance and agitation. No major dysmorphisms were noted. ABR, EEG and brain MRI were all normal.

CMA and *FMR1* analyses were performed, with no abnormalities detected. WGS revealed a *de novo* *BRSK2* frameshift variant (NP\_001243556.1:p.(Asp540GlufsTer9)).

### **Proband 40.3**

The patient is a 12-year-old twin boy with ASD, diagnosed at 4 years of age. Dichorionic diamniotic pregnancy was uneventful, caesarean section was performed at 39 weeks. Birth weight was 2900 g and neonatal parameters were normal.

Motor development was regular, he walked unsupported at age 10 months. At 18 months, his parents noted a mild delay in verbal skills, but only at 3 years he was referred to child neurologist and he was diagnosed with ASD at the age of 4 years. His IQ, evaluated at 4 years through Leiter-R test, was 111. After 5 years of age, he started composing complex sentences. No anomalies were detected at EEG and brain MRI.

He was born from healthy, non-consanguineous parents. His dizygotic twin brother (40.4) also has an ASD diagnosis, with no ID, but a less structured language. EEG and MRI analyses did not reveal any anomalies. The remaining family history is unremarkable.

CMA and *FMR1* analyses were performed on both twins, with no abnormalities detected. WGS revealed a *de novo* *SCN3A* variant (NP\_008853.3:p.(Arg1630Ter)), not shared with his twin.

At the last evaluation, at the age of 11 years and 8 months, his height was 150 cm (64<sup>th</sup> percentile) and OFC 53 cm (35<sup>th</sup> percentile). No major dysmorphisms were noticeable (Supplementary Figure 14b). We only noted mild kyphosis, bilateral clinodactyly of the 5<sup>th</sup> finger, bilateral syndactyly of 2<sup>nd</sup>-3<sup>rd</sup> toes.



### Proband 81.3

The patient is a 7 years old boy, with a clinical history of global developmental delay and ASD. He was born at 41 weeks after an uneventful pregnancy. Birth weight was 3300 g, length 52 cm and OFC 35 cm.

At 8 days of life, he started showing episodes of generalized pallor with perioral cyanosis, hypotonia and apneas. EEG and ECG were performed with normal results. Cerebral US detected ventricular asymmetry (left>right). The episodes were attributed to gastroesophageal reflux disease (GERD) and became milder and less frequent with anti-reflux therapy. At 15 months of age, a cluster of 3 seizures occurred, characterized by eye deviation, hypertonia and myoclonus, during an episode of gastroenteritis. Since the age of 6 years, the child has presented focal epileptic motor seizures with or without secondary generalization. Currently he is taking Valproic Acid. EEG shows epileptic abnormalities in right central-parietal regions. Brain MRI (3 Tesla) was normal.

Motor milestones were regularly acquired, while verbal skills were delayed. Due to absent language, poor eye contact and stereotyped behaviors, he was referred to child neurologist at the age of 2 years, where developmental delay and ASD diagnosis was diagnosed at the age of 2 years and 10 months. Macrocephaly (OFC > +2 SD) was reported since then. Despite speech therapy, language is still absent with the emission of only mono-syllabic sounds. Severe ID is present.

He was born from non-consanguineous parents. He has an older healthy brother. Family history is positive for nonfebrile seizures (mother and maternal grandmother), eventually resolved without sequelae.

He first underwent FXS analysis, with detection of a normal *FMR1* allele. CMA was then performed, with the detection of a large duplication 15q13.2-13.3, also confirmed by SNP array and WGS data. The duplication is inherited from the mother, who has a personal and family history of uncomplicated seizures. In addition to this recurrent CNV, WGS detected a *de novo* *NFIX* heterozygous variant (NP\_001352831.1:p.(Leu75Pro)) in the proband, providing a clinical diagnosis of Malan syndrome. This result also confirmed that the duplication was not the main cause of the patient's condition, even if we couldn't exclude a partial contribution to his complex phenotype.

At the last evaluation, at the age of 7 years and 9 months, height was 129 cm (65<sup>th</sup> percentile) and OFC 56,9 (+3.5 SD), indicating the presence of macrocephaly. In addition, he had dolicocephaly with a wide forehead, low set eyes, high-arched and narrow palate (Supplementary Figure 14c). As collateral findings, we also reported a supernumerary left nipple and two café-au-lait spots, one in the back between scapulae and one in the right forearm.

## Supplementary References

1. Sasson, N.J. et al. The broad autism phenotype questionnaire: prevalence and diagnostic classification. *Autism Res* **6**, 134-143 (2013).
2. Skuse, D.H., Mandy, W.P., Scourfield, J. Measuring autistic traits: heritability, reliability and validity of the Social and Communication Disorders Checklist. *Br J Psychiatry* **187**, 568-72 (2005).
3. Fu, J.M. et al. Rare coding variation provides insight into the genetic architecture and phenotypic context of autism. *Nature Genetics* **54**, 1320-1331 (2022).
4. Trost, B. et al. Genomic architecture of autism from comprehensive whole-genome sequence annotation. *Cell* **185**, 4409-4427.e4418 (2022).
5. Satterstrom, F. K. et al. Large-Scale Exome Sequencing Study Implicates Both Developmental and Functional Changes in the Neurobiology of Autism. *Cell* **180**, 568-584.e523 (2020).
6. Dickinson, M. E. et al. High-throughput discovery of novel developmental phenotypes. *Nature* **537**, 508-514 (2016).
7. Lamar, T. et al. SCN3A deficiency associated with increased seizure susceptibility. *Neurobiol Dis* **102**, 38-48 (2017).
8. Planells-Cases, R. et al. Neuronal death and perinatal lethality in voltage-gated sodium channel alpha(II)-deficient mice. *Biophys J* **78**, 2878-2891 (2000).
9. Li, M. et al. Antisense oligonucleotide therapy reduces seizures and extends life span in an SCN2A gain-of-function epilepsy model. *J Clin Invest* **131** (2021).
10. Costantini, D.L. et al. The homeodomain transcription factor *Irx5* establishes the mouse cardiac ventricular repolarization gradient. *Cell* **123**, 347-358 (2005).
11. Kohl, S. et al. A duplication on chromosome 16q12 affecting the *IRXB* gene cluster is associated with autosomal dominant cone dystrophy with early tritanopic color vision defect. *Hum Mol Genet* **30**, 1218-1229 (2021).
12. Peça, J. et al. Shank3 mutant mice display autistic-like behaviours and striatal dysfunction. *Nature* **472**, 437-442 (2011).
13. Wang, X. et al. Synaptic dysfunction and abnormal behaviors in mice lacking major isoforms of Shank3. *Hum Mol Genet* **20**, 3093-3108 (2011).
14. Bidinosti, M. et al. CLK2 inhibition ameliorates autistic features associated with SHANK3 deficiency. *Science* **351**, 1199-1203 (2016).
15. Mei, Y. et al. Adult restoration of Shank3 expression rescues selective autistic-like phenotypes. *Nature* **530**, 481-484 (2016).
16. Han, K. et al. SHANK3 overexpression causes manic-like behaviour with unique pharmacogenetic properties. *Nature* **503**, 72-77 (2013).
17. Cox, G.A. et al. Sodium/hydrogen exchanger gene defect in slow-wave epilepsy mutant mice. *Cell* **91**, 139-148 (1997).
18. Kröll-Hermi, A. et al. Proteasome subunit PSMC3 variants cause neurosensory syndrome combining deafness and cataract due to proteotoxic stress. *EMBO Mol Med* **12**, e11861 (2020).
19. Hafezparast, M. et al. Mutations in dynein link motor neuron degeneration to defects in retrograde transport. *Science* **300**, 808-812 (2003).
20. Braunstein, K.E. et al. A point mutation in the dynein heavy chain gene leads to striatal atrophy and compromises neurite outgrowth of striatal neurons. *Hum Mol Genet* **19**, 4385-4398 (2010).

21. Eschbach, J. et al. Dynein mutations associated with hereditary motor neuropathies impair mitochondrial morphology and function with age. *Neurobiol Dis* **58**, 220-230 (2013).
22. Ori-McKenney, K. M., Vallee, R. B. Neuronal migration defects in the Loa dynein mutant mouse. *Neural Dev* **6**, 26 (2011).
23. Driller, K. et al. Nuclear factor I X deficiency causes brain malformation and severe skeletal defects. *Mol Cell Biol* **27**, 3855-3867 (2007).
24. Campbell, C.E. et al. The transcription factor Nfix is essential for normal brain development. *BMC Dev Biol* **8**, 52 (2008).
25. Harris, L. et al. Heterozygosity for nuclear factor one x affects hippocampal-dependent behaviour in mice. *PLoS One* **8**, e65478 (2013).
26. Zhou, B. et al. Loss of NFIX Transcription Factor Biases Postnatal Neural Stem/Progenitor Cells Toward Oligodendrogenesis. *Stem Cells Dev* **24**, 2114-2126 (2015).
27. Paul, M.S., Duncan, A.R., Genetti, C.A., et al. Rare EIF4A2 variants are associated with a neurodevelopmental disorder characterized by intellectual disability, hypotonia, and epilepsy. *Am J Hum Genet* **110**, 120-145 (2023).
28. Kobayashi, T., Minowa, O., Sugitani, Y., et al. A germ-line Tsc1 mutation causes tumor development and embryonic lethality that are similar, but not identical to, those caused by Tsc2 mutation in mice. *Proc Natl Acad Sci USA* **98**, 8762-8767 (2001).
29. Kwiatkowski, D.J., Zhang, H., Bandura, J.L., et al. A mouse model of TSC1 reveals sex-dependent lethality from liver hemangiomas, and up-regulation of p70S6 kinase activity in Tsc1 null cells. *Hum Mol Genet* **11**, 525-534 (2002).
30. Uhlmann, E.J., Apicelli, A.J., Baldwin, R.L., et al. Heterozygosity for the tuberous sclerosis complex (TSC) gene products results in increased astrocyte numbers and decreased p27-Kip1 expression in TSC2+/- cells. *Oncogene* **21**, 4050-4059 (2002).
31. Goorden, S.M., van Woerden, G.M., van der Weerd, L., Cheadle, J.P., Elgersma, Y. Cognitive deficits in Tsc1+/- mice in the absence of cerebral lesions and seizures. *Ann Neurol* **62**, 648-655 (2007).
32. Zeng, L.H., Xu, L., Gutmann, D.H., Wong, M. Rapamycin prevents epilepsy in a mouse model of tuberous sclerosis complex. *Ann Neurol* **63**, 444-453 (2008).
33. Abs, E., Goorden, S.M., Schreiber, J., et al. TORC1-dependent epilepsy caused by acute biallelic Tsc1 deletion in adult mice. *Ann Neurol* **74**, 569-579 (2013).
34. Tsai, P.T., Hull, C., Chu, Y., et al. Autistic-like behaviour and cerebellar dysfunction in Purkinje cell Tsc1 mutant mice. *Nature* **488**, 647-651 (2012).
35. Lim, J.S., Gopalappa, R., Kim, S.H. et al. Somatic Mutations in TSC1 and TSC2 Cause Focal Cortical Dysplasia. *Am J Hum Genet* **100**, 454-472 (2017).
36. Ercan, E., Han, J.M., Di Nardo, A., et al. Neuronal CTGF/CCN2 negatively regulates myelination in a mouse model of tuberous sclerosis complex. *J Exp Med* **214**, 681-697 (2017).
37. Hirotsune, S., Fleck, M.W., Gambello, M.J. et al. Graded reduction of Pafah1b1 (Lis1) activity results in neuronal migration defects and early embryonic lethality. *Nat Genet* **19**, 333-339 (1998).
38. Assadi, A.H., Zhang, G., Beffert, U., et al. Interaction of reelin signaling and Lis1 in brain development. *Nat Genet* **35**, 270-276 (2003).
39. Pawlisz, A.S., Mutch, C., Wynshaw-Boris, A., Chenn, A., Walsh, C.A., Feng, Y. Lis1-Nde1-dependent neuronal fate control determines cerebral cortical size and lamination. *Hum Mol Genet* **17**, 2441-2455 (2008).

40. Yamada, M., Yoshida, Y., Mori, D., et al. Inhibition of calpain increases LIS1 expression and partially rescues in vivo phenotypes in a mouse model of lissencephaly. *Nat Med* **15**, 1202-1207 (2009).
41. Greenwood, J.S., Wang, Y., Estrada, R.C., Ackerman, L., Ohara, P.T., Baraban, S.C. Seizures, enhanced excitation, and increased vesicle number in Lis1 mutant mice. *Ann Neurol* **66**, 644-653 (2009).
42. Cahana, A., Escamez, T., Nowakowski, R.S. et al. Targeted mutagenesis of Lis1 disrupts cortical development and LIS1 homodimerization. *Proc Natl Acad Sci USA* **98**, 6429-6434 (2001).
43. Liu, Z., Steward, R., Luo, L. Drosophila Lis1 is required for neuroblast proliferation, dendritic elaboration and axonal transport. *Nat Cell Biol* **2**, 776-783 (2000).
44. Williams, S.N., Locke, C.J., Braden, A.L., Caldwell, K.A., Caldwell, G.A. Epileptic-like convulsions associated with LIS-1 in the cytoskeletal control of neurotransmitter signaling in *Caenorhabditis elegans*. *Hum Mol Genet* **13**, 2043-2459 (2004).
45. Stephen, J., Maddirevula, S., Nampoothiri, S. et al. Bi-allelic TMEM94 Truncating Variants Are Associated with Neurodevelopmental Delay, Congenital Heart Defects, and Distinct Facial Dysmorphism. *Am J Hum Genet* **103**, 948-967 (2018).
46. Leblond, C.S., Le, T.L., Malesys, S. et al. Operative list of genes associated with autism and neurodevelopmental disorders based on database review. *Mol Cell Neurosci* **113**, 103623 (2021).

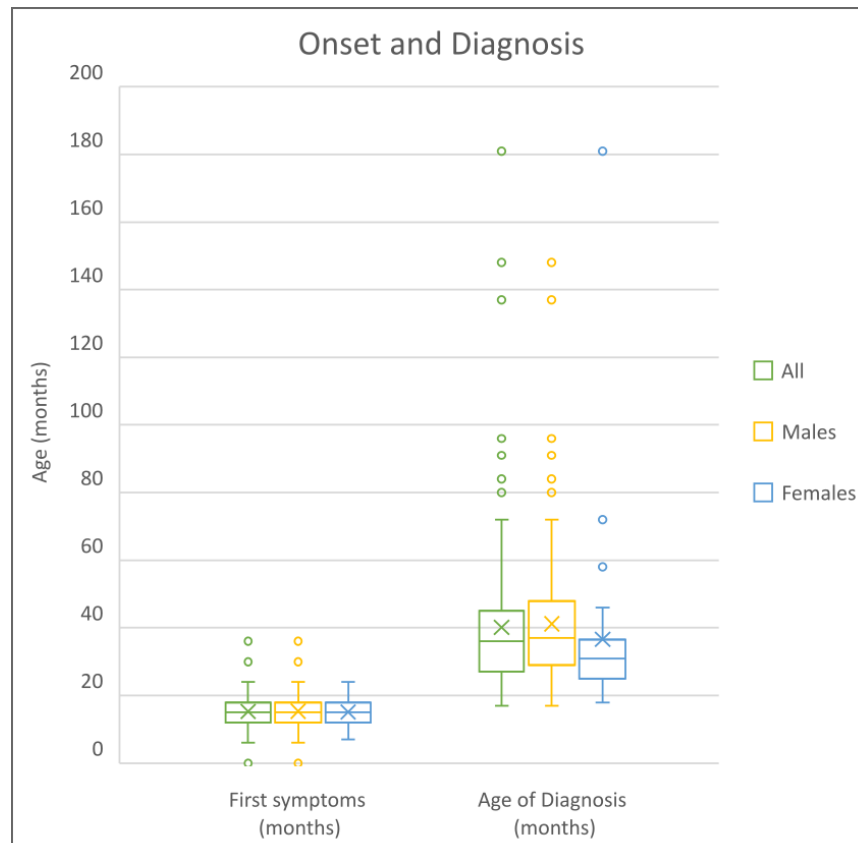

**Supplementary Figure 1. Age of onset of first symptoms and age of diagnosis of ASD individuals, stratified by sex.**

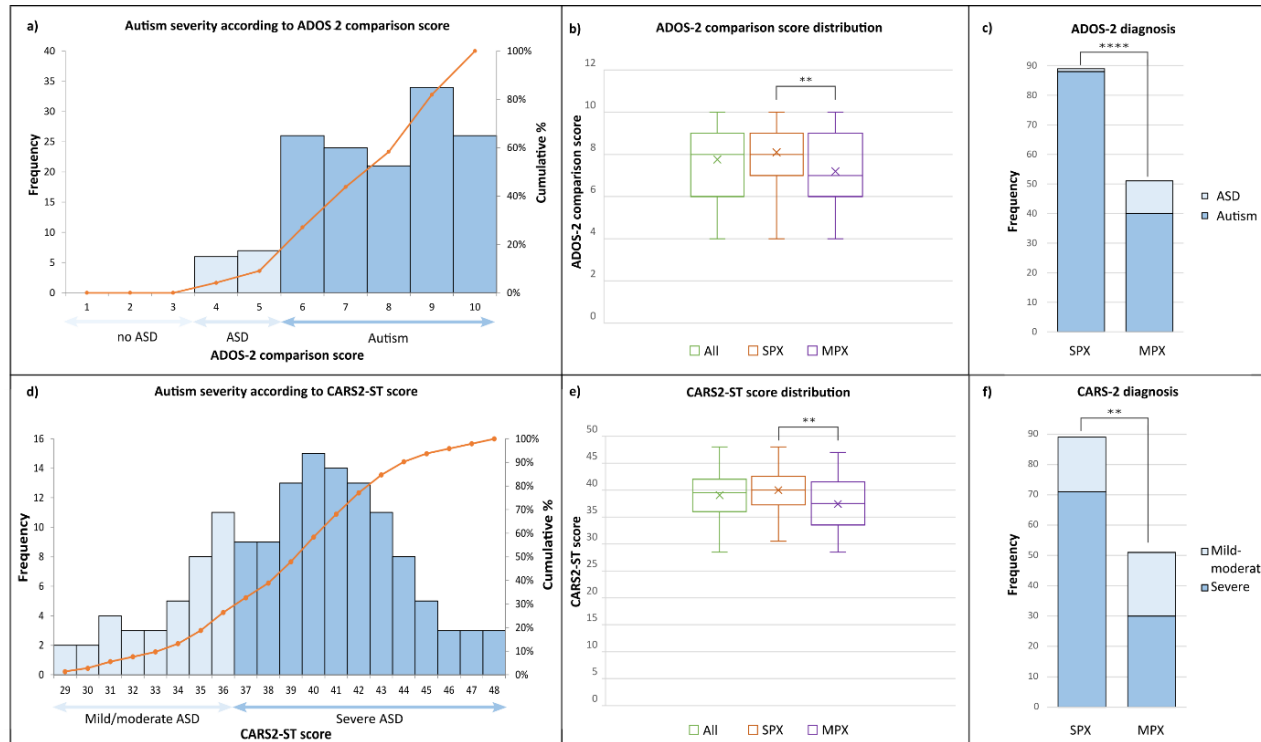

**Supplementary Figure 2. Autism severity in the entire cohort of 144 probands and stratified by family type (SPX/MPX).** Autism severity in the entire cohort according to ADOS-2 comparison score (a) and to CARS2-ST score (d). ADOS-2 comparison scores 1-3 correspond to non-spectrum related symptoms scores 4-5 correspond to autism-spectrum related symptoms, while scores of  $\geq 6$  correspond to autism-related symptoms. CARS total scores  $< 30$  indicate that an individual is “non-autistic,” scores 30-36.5 indicate “mild to moderate autism” while scores 37-60 correspond to “severe autism”. (b) ADOS-2 comparison score and (e) CARS2-ST score distribution in the entire cohort of probands and in probands from SPX and MPX families. The mean ADOS-2 comparison score and CARS2-ST score of simplex probands are significantly higher than multiplex probands (ADOS-2 and CARS2-ST scores two-sided t-test  $p$ -value = 0.005 and 0.001, respectively). Comparison of ADOS-2 (c) and CARS-2 (f) diagnosis categories in SPX and MPX. ADOS-2 “autism” diagnosis and CARS-2 “severe autism” diagnosis are significantly higher in SPX families (ADOS-2 Fisher’s Exact Test  $p$ -value =  $6 \times 10^{-5}$  and CARS-2 chi2 test  $p$ -value = 0.008).

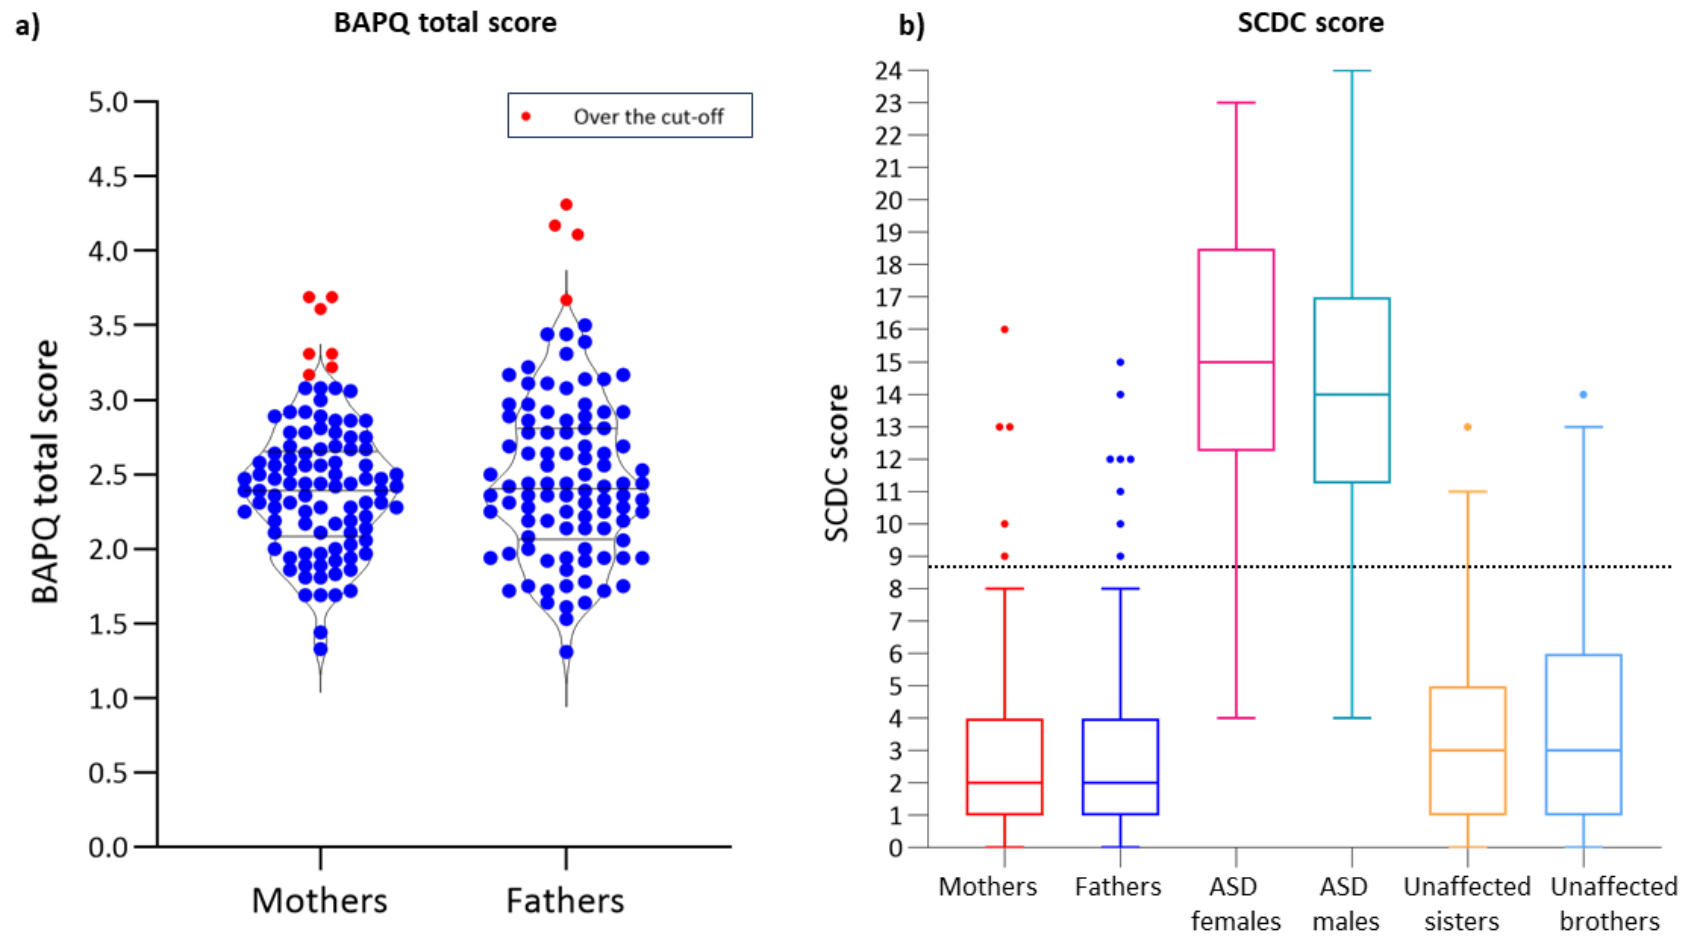

**Supplementary Figure 3. Score distribution of the Broad Autism Phenotype Questionnaire (BAPQ) in parents and the Social and Communication Disorders Checklist (SCDC) in the entire cohort.** a) BAPQ total score in parents. Red points indicate individuals with BAPQ score over the cutoffs (male threshold= 3.55; female threshold=3.17)<sup>1</sup>. b) Boxplots of SCDC scores in parents, affected individuals and unaffected siblings. The dotted line indicates the suggested cut-off score (a score of 9 or above reflects difficulties in social interaction and communication)<sup>2</sup>.

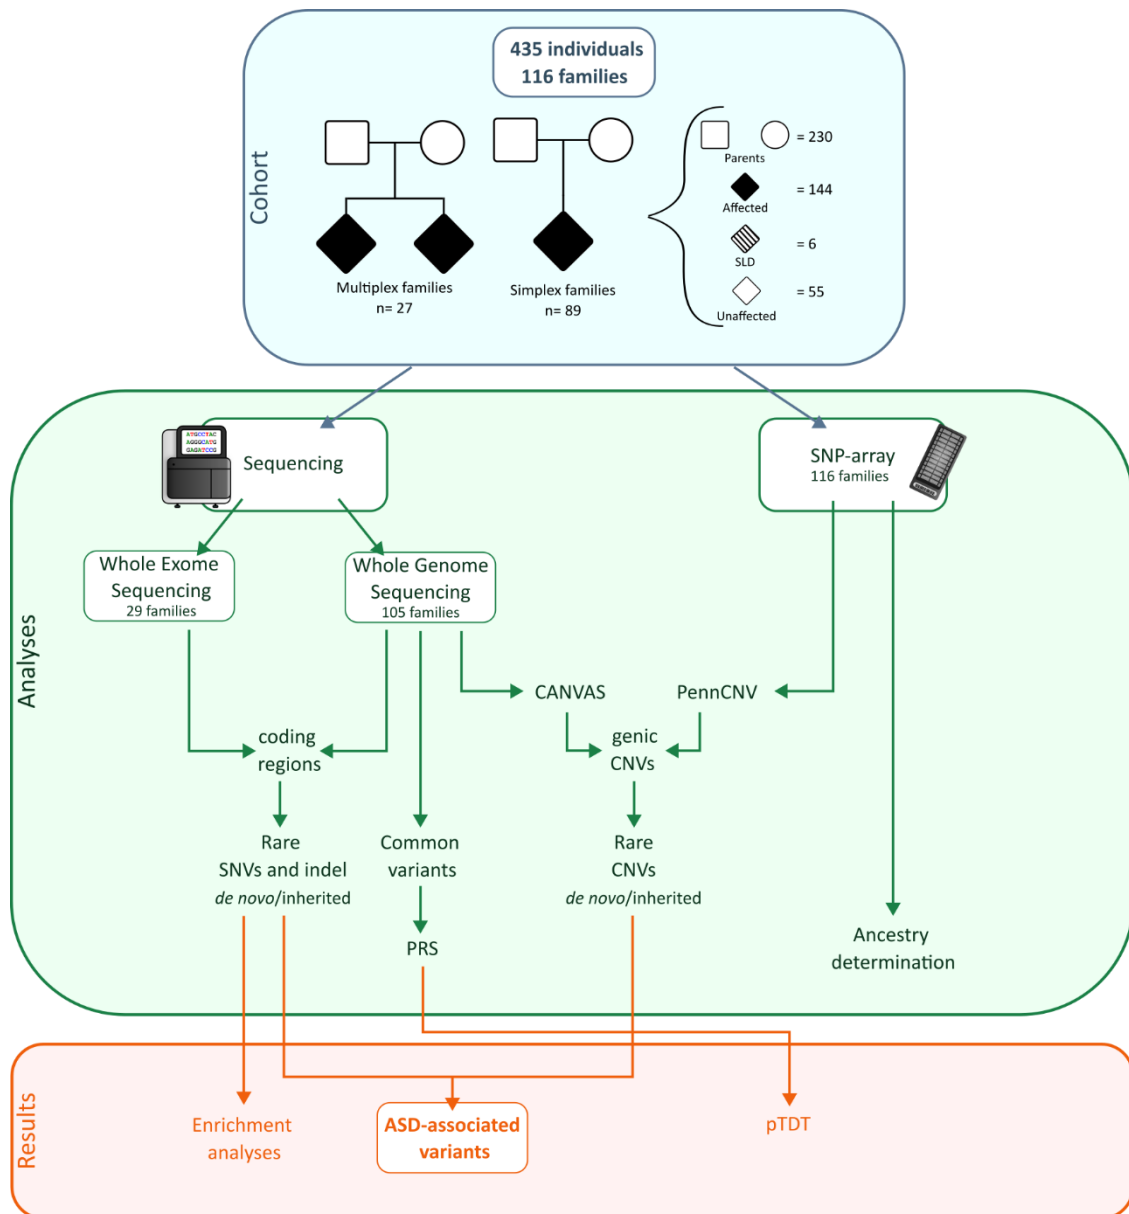

**Supplementary Figure 4. Analysis workflow.** This workflow shows the cohort composition and the primary analyses performed in this study. 18 families were analysed by both WES and WGS. Filtering steps employed to prioritize rare coding variants that could be associated with ASD susceptibility are described in detail in the Methods.



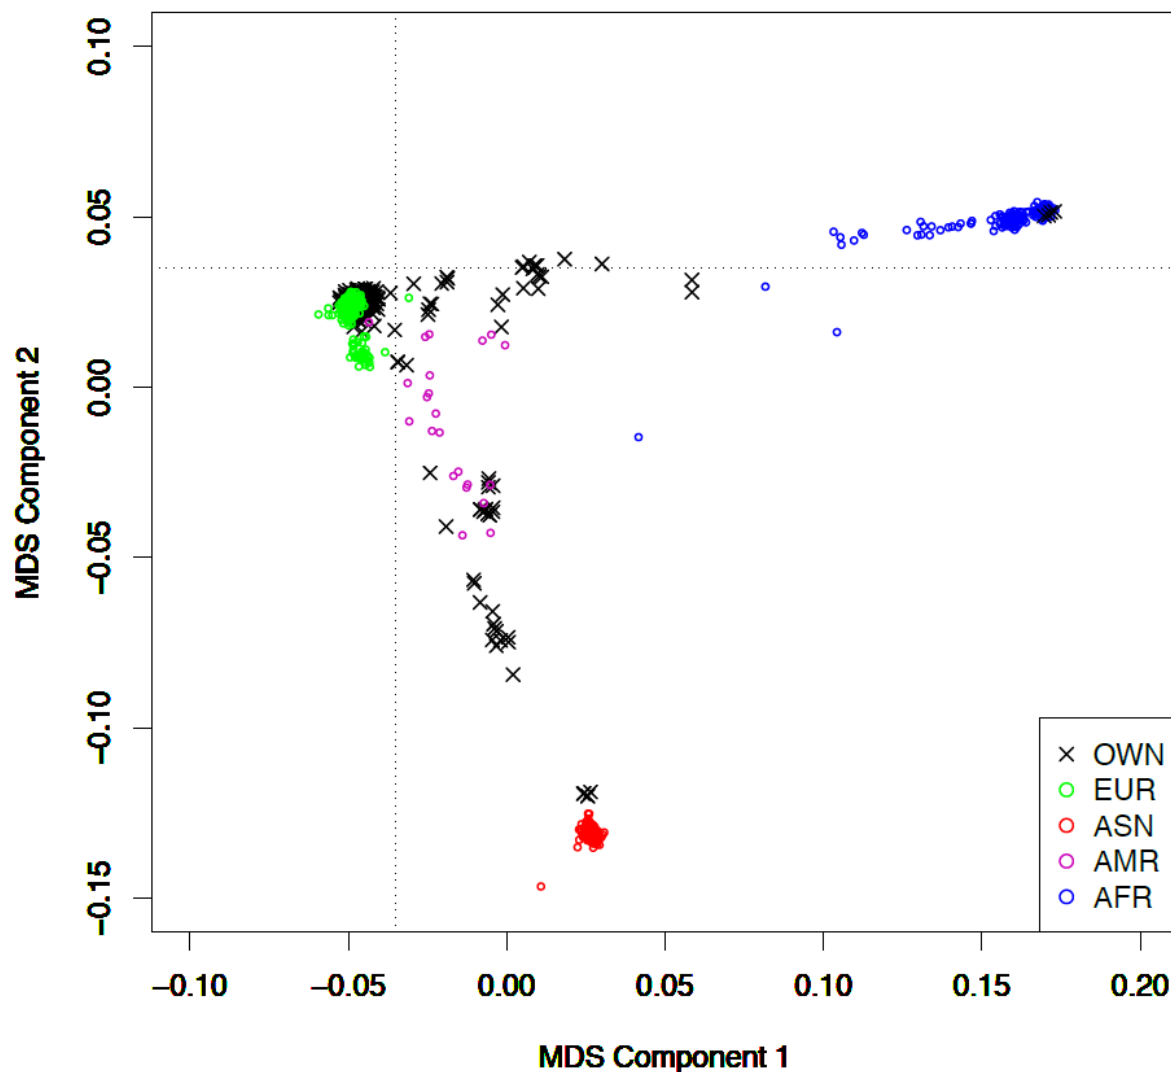

**Supplementary Figure 5. Genotype-computed ancestry of individuals included in this study.** Multidimensional scaling (MDS) analysis was performed merging our cohort data with the 1000 Genomes Project reference panel (20100804 release). We assigned ancestry labels to all individuals of our cohort through visual inspection of the first two MDS coordinates and confirmed that 19 families are of non-European origin, consistent with self-reported ancestry. Green, red, pink and blue circles indicate European (EUR), Asian (ASN), Admixed American (AMR) and African (AFR) individuals of the 1000G, respectively. Black crosses indicate all individuals included in this study (n=435).

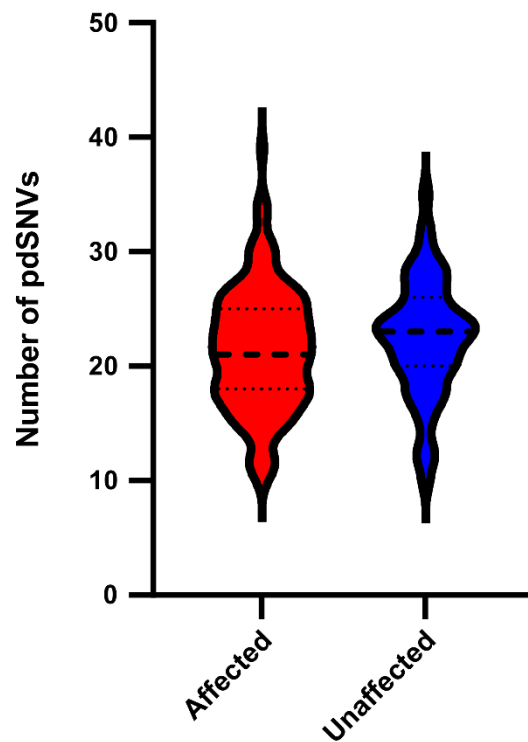

**Supplementary Figure 6. Rate of rare coding *de novo* and inherited pdSNVs in ASD individuals and unaffected siblings.** Comparison of individual rate of *de novo* and inherited pdSNVs in cases and unaffected siblings (ASD cases=144, unaffected siblings=55). pdSNVs include PTVs in genes with LOEUF>0.6 (PTV<sub>LOEUF</sub>), missense variants with MPC score  $\geq 2$  (DmisB) and missense variants with MPC score 1-2 (DmisA).

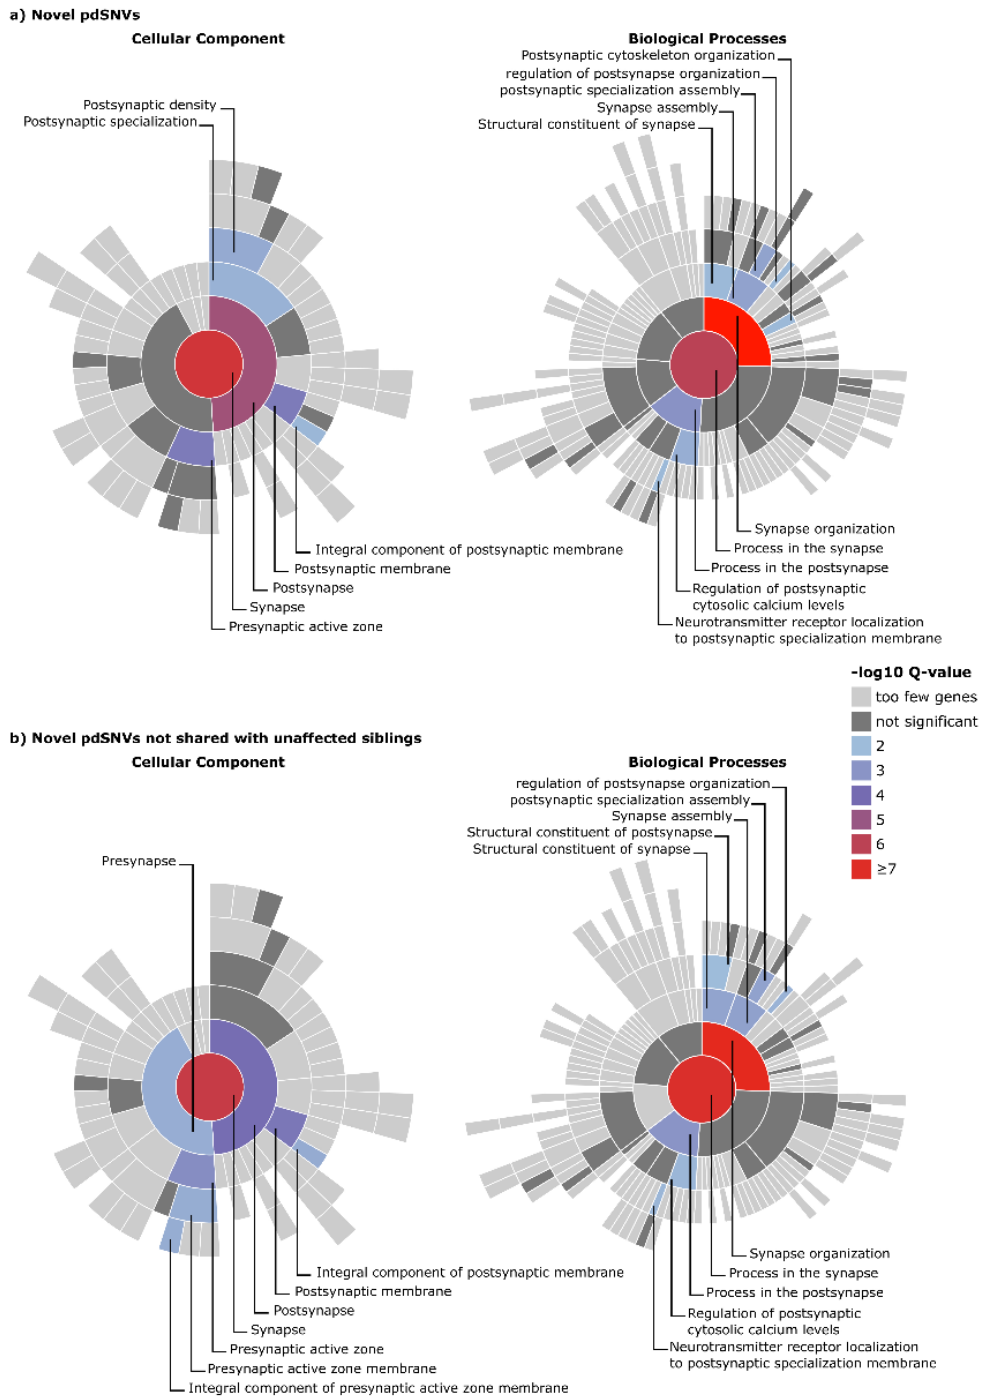

**Supplementary Figure 7. Enrichment for *de novo* and inherited novel pdSNVs in SynGO Genes.** Visualisation of gene set enrichment analyses (GSEA) of genes harbouring novel pdSNVs (a) and novel pdSNVs not shared with unaffected siblings (b) in affected individuals, each compared to a background set of brain-expressed genes. All Cell Components (CC) or Biological Process (BP) related terms with gene annotations in SynGO are plotted in a circular fashion, with the highest hierarchical term (“synapse” for CC or “process in synapse” for BP) in the centre and each layer of subclasses in outward concentric rings. Over-represented synaptic terms are indicated with different colours, according to the Q-value, and are reported in detail in Supplementary Table 7b-c. Genes harbouring novel pdSNVs and novel pdSNVs not shared with unaffected siblings in cases show an enrichment of synaptic terms comparable to genes harbouring pdSNVs. The four most enriched CC and BP are retained.

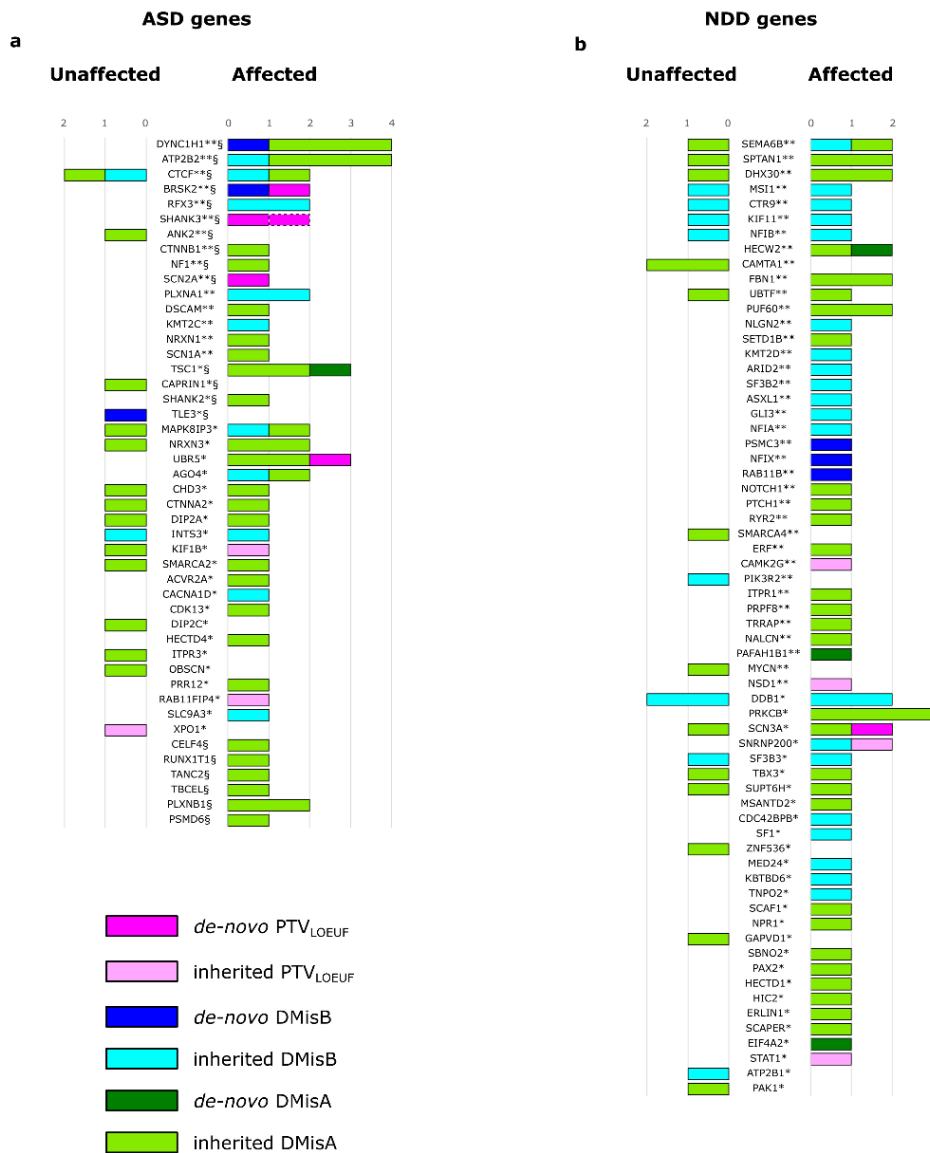

**Supplementary Figure 8. Contribution of *de novo* and inherited novel pdSNVs to high confidence ASD/NDD genes.** *De novo* and inherited novel pdSNVs include PTVs in genes with LOEUF score <0.6 (PTV<sub>LOEUF</sub>), missense variants with MPC score  $\geq 2$  (DMisB) and missense variants with MPC score 1-2 (DMisA). Contribution of each variant type identified in ASD individuals and unaffected siblings for a list of genes previously associated to ASD (a) and NDD (b). The list of ASD genes comprised 185 genes associated at  $FDR \leq 0.05^3$  and 135 genes with  $FDR < 0.1^4$  (88 of which were common between the two lists). In our cohort, novel pdSNVs were identified in 46 ASD genes (a). The list of NDD genes included 452 genes from a list of 664 genes associated at  $FDR \leq 0.05$ , after the exclusion of the genes already included among the 232 ASD genes<sup>3</sup>. In our cohort, novel pdSNVs were identified in 64 NDD genes (b). \*\*, genes with  $FDR \leq 0.001^3$ ; \*, genes with  $FDR \leq 0.05^3$ ; §, genes with  $FDR < 0.1^4$ ; dotted line indicates a putative *de novo* PTV<sub>LOEUF</sub>.

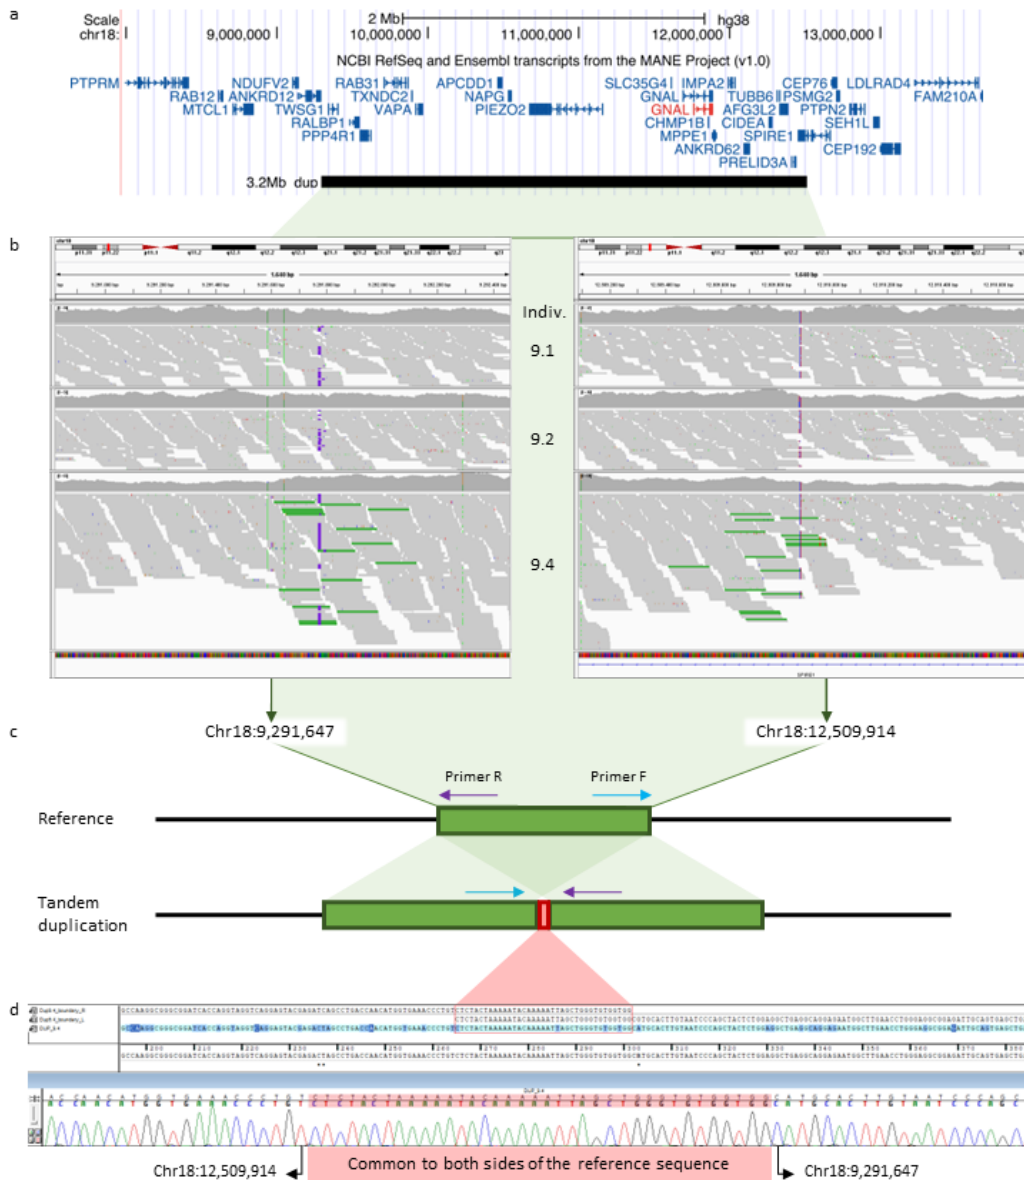

**Supplementary Figure 9. *De novo* large duplication in Family 9.** a) UCSC schematic (hg38) showing the 18p11.22-p11.21 region. The 3.2 Mb *de novo* duplication identified in individual 9.4 is indicated by a black bar. The transcripts from the MANE track are shown for each gene. b) IGV visualisation of the breakpoints. Read alignments are shown for the father (9.1), mother (9.2) and SLD child (9.4). The positions of the two clusters of green reads in 9.4 indicate the boundaries of the tandem duplicated fragment. c) Schematic indicating the location of the primers used to validate the position of the breakpoints. Tandem duplicated sequence indicated in green, forward and reverse primers are indicated with blue and purple arrows, respectively. The primers are designed such that in the reference sequence they are divergent (top), whereas in the tandem duplicated allele they are convergent and can generate a PCR product across the junction. d) Chromatogram of the junction between the duplicated segments demonstrating their tandem orientation. The sequence highlighted in red is common to both ends of the duplicated fragment and therefore cannot be definitively ascribed to either.

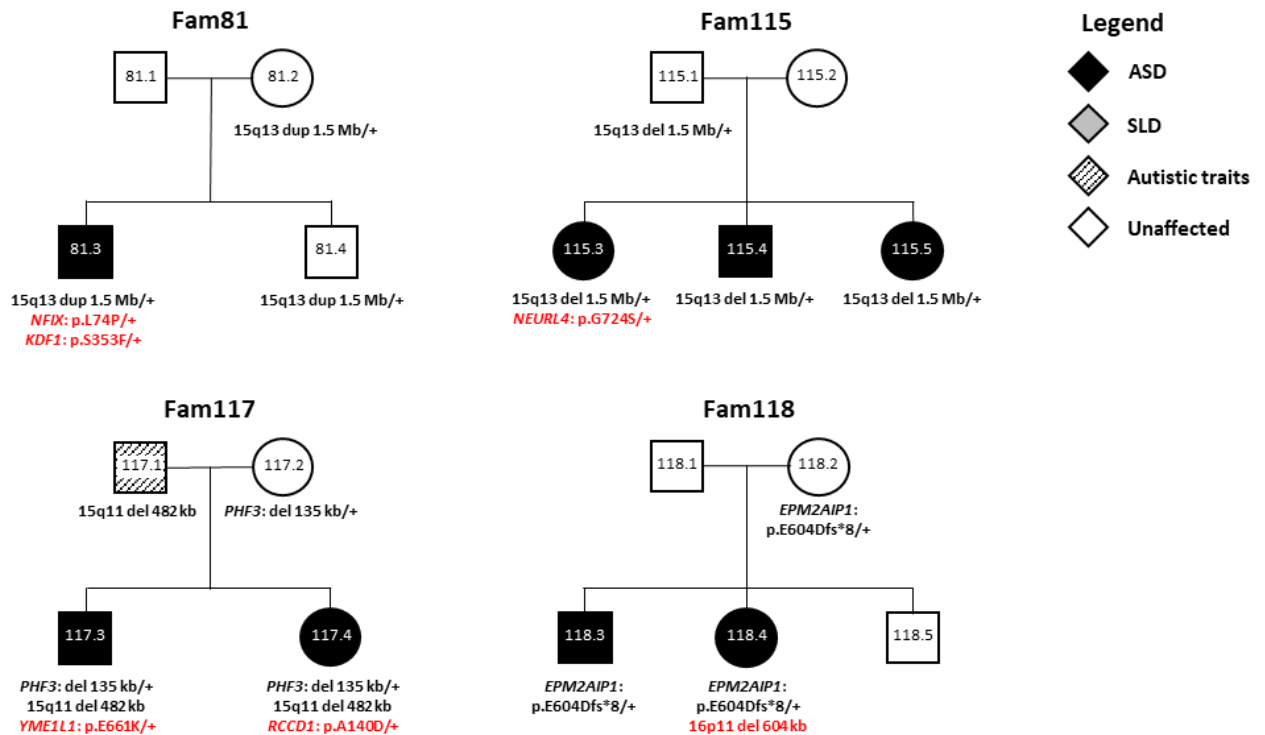

**Supplementary Figure 10. Multiple hits in families with CNVs in genomic disorders loci.**

Pedigrees of families carrying a CNV associated with recurrent genomic disorders (RGD) and additional hits consisting of i) *de novo* pdSNVs, ii) PTV<sub>S<sub>LOEUF</sub> in NDD genes inherited from the parent not transmitting the recurrent CNV, iii) pdCNVs inherited from the parent not transmitting the recurrent CNV (listed in Table 2). *De novo* variants are reported in red. ASD, autism spectrum disorder; SLD, specific learning disabilities; del, deletion; dup, duplication. All HGVS nomenclatures are based on the MANE select transcripts.</sub>

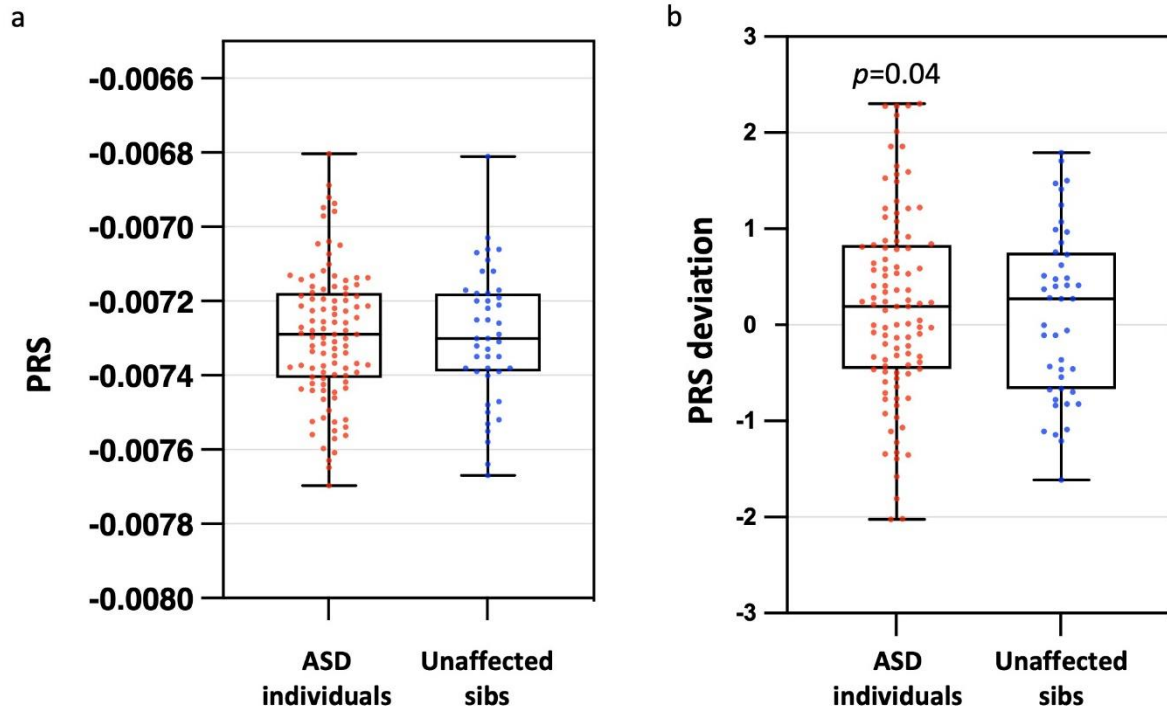

**Supplementary Figure 11. PRS analysis.** a) PRS distributions in cases ( $n=103$ ) and unaffected siblings ( $n=44$ ). b) Polygenic transmission disequilibrium test (pTDT) showed that PRS was significantly over-transmitted in individuals with ASD (pTDT mean=0.20,  $p$ -value=0.0), but not in non-ASD siblings (pTDT mean=0.11,  $p$ -value=0.39).

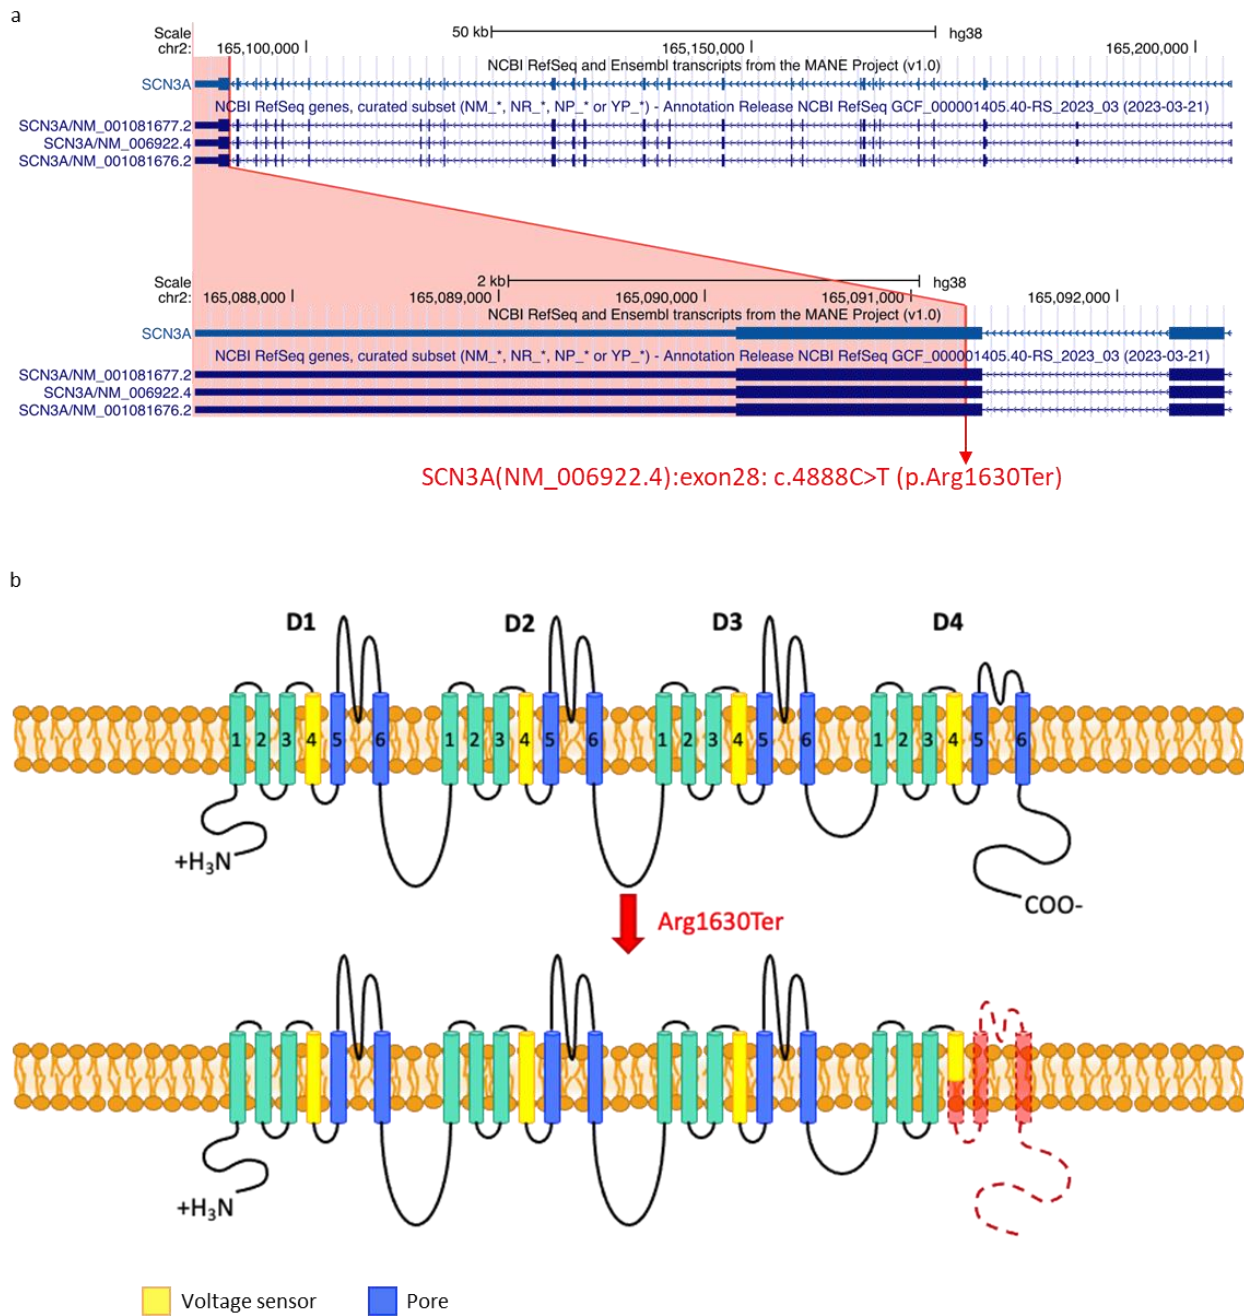

**Supplementary Figure 12. *SCN3A* *de novo* stop-gain variant in Family 40.** a) UCSC schematic (hg38) showing the genomic structure of *SCN3A*. The position of the *de novo* stop-gain variant, mapping within the last exon of all Refseq isoforms, is indicated by the red arrow. b) Schematic of the *SCN3A* protein. *SCN3A* encodes the type III voltage-gated sodium (Na<sup>+</sup>)  $\alpha$  subunit Nav1.3, a transmembrane protein with four domains (D1-D4), each formed by six subunits (S1-6). Subunits 4 (S4) act as "voltage sensor" and transduce the transmembrane voltage into mechanical changes that alter channel gating. Subunits S5-6 form the channel pore. The premature stop-gain identified in our study is predicted to determine the loss of half of S4D4, critical for voltage sensing, the two pore-building segments S5D4 and S6D4, and the entire cytoplasmic C-terminal tail, needed for the protein-protein interaction with one of the  $\beta$  subunits.





a) Proband 14.4

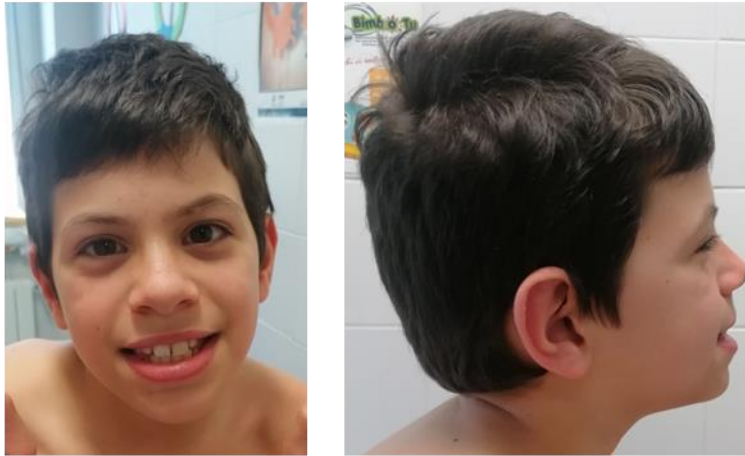

b) Proband 40.3

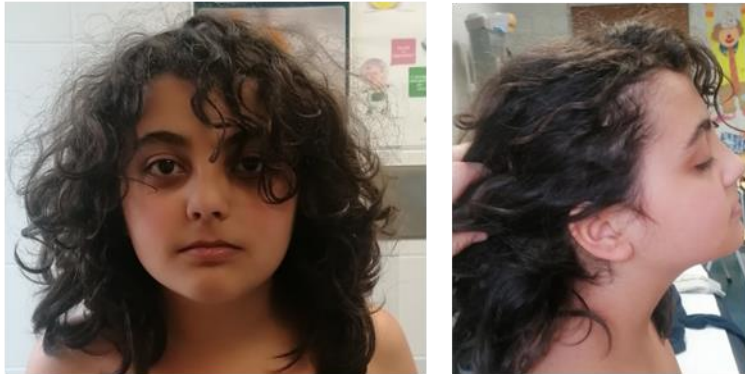

c) Proband 81.3

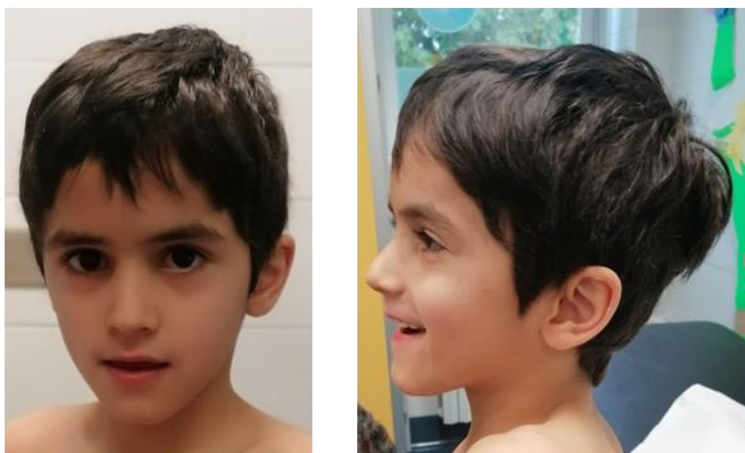

**Supplementary Figure 14. Facial photographs of probands with *BRSK2*, *SCN3A* and *NFIX* *de novo* variants.** For detailed descriptions please see Supplementary Data. Written consent was obtained for publication of the photographs.

Supplementary Table 1: Summary of phenotype information for individuals with ASD

|                                                           | All individuals    | Males              | Females            | Multiplex families<br>(n= 25) | Simplex families<br>(n= 89) |
|-----------------------------------------------------------|--------------------|--------------------|--------------------|-------------------------------|-----------------------------|
| <b>Number (n)</b>                                         | 144                | 110                | 34                 | 51                            | 89                          |
| <b>Investigation method</b>                               |                    |                    |                    |                               |                             |
| WGS                                                       | 92                 | 71                 | 21                 | 7                             | 83                          |
| WES                                                       | 20                 | 12                 | 8                  | 17                            | 3                           |
| WGS and WES                                               | 32                 | 27                 | 5                  | 27                            | 3                           |
| SNP-array                                                 | 144                | 110                | 34                 | 51                            | 89                          |
| <b>Clinical Diagnosis (ICD-10) [n (%)]</b>                |                    |                    |                    |                               |                             |
| F84.0                                                     | 123 (85.4%)        | 93 (84.5%)         | 30 (88.2%)         | 36 (70.6%)                    | 84 (94.4%)                  |
| F84.5                                                     | 2 (1.4%)           | 2 (1.8%)           | 0 (0%)             | 2 (3.9%)                      | 0 (0%)                      |
| F84.9                                                     | 19 (13.2%)         | 15 (13.6%)         | 4 (11.8%)          | 13 (25.5%)                    | 5 (5.6%)                    |
| <b>Age of Diagnosis (months) [Mean; SD; range]</b>        | 40.1; 22.4; 17-181 | 41.2; 20.5; 17-148 | 36.5; 27.7; 18-181 | 40.0; 16.9; 17-91             | 39.8; 25.3; 18-181          |
| <b>Symptoms Onset Pattern [n (%)]</b>                     |                    |                    |                    |                               |                             |
| Early Onset                                               | 113 (78.5%)        | 85 (77.3%)         | 28 (82.4%)         | 41 (80.4%)                    | 68 (76.4%)                  |
| Regressive                                                | 10 (6.9%)          | 10 (9.1%)          | 0 (0%)             | 3 (5.9%)                      | 7 (7.9%)                    |
| Plateau                                                   | 2 (1.4%)           | 1 (0.9%)           | 1 (2.9%)           | 0 (0%)                        | 2 (2.2%)                    |
| Mixed                                                     | 19 (13.2%)         | 14 (12.7%)         | 5 (14.7%)          | 7 (13.7%)                     | 12 (13.5%)                  |
| <b>Onset of first symptoms (months) [Mean; SD; range]</b> | 15.6; 4.9; 6-36    | 15.8; 5.1; 6-36    | 15.3; 4.1; 7-24    | 16.2; 5.5; 6-36               | 15.4; 4.6; 6-36             |
| <b>ADOS-2 diagnosis [n (%)]</b>                           |                    |                    |                    |                               |                             |
| Autism                                                    | 132 (91.7%)        | 101 (91.8%)        | 31 (91.2%)         | 40 (78.4%)                    | 88 (98.9%)                  |
| ASD                                                       | 12 (8.3%)          | 9 (8.2%)           | 3 (8.8%)           | 11 (21.6%)                    | 1 (1.1%)                    |
| <b>ADOS-2 comparison score [Mean; SD; range]</b>          | 7.8; 1.7; 4-10     | 7.7; 1.7; 4-10     | 7.9; 1.7; 5-10     | 7.2; 1.9; 4-10                | 8.1; 1.5; 4-10              |
| <b>CARS-2 diagnosis [n (%)]</b>                           |                    |                    |                    |                               |                             |
| Severe                                                    | 103 (71.5%)        | 79 (71.8%)         | 24 (70.6%)         | 30 (58.8%)                    | 71 (79.8%)                  |
| Mild-moderate                                             | 41 (28.5%)         | 31 (28.2%)         | 10 (29.4%)         | 21 (41.2%)                    | 18 (20.2%)                  |
| <b>CARS2-ST [Mean; SD; range]</b>                         | 39.0; 4.3; 28.5-48 | 38.9; 4.3; 28.5-48 | 39.6; 4.1; 31-48   | 37.4; 4.7; 28.5-47            | 40.0; 3.7; 30.5-48          |
| <b>Language level [n (%)]</b>                             |                    |                    |                    |                               |                             |
| 0 (no problems)                                           | 2 (1.4%)           | 2 (1.8%)           | 0 (0%)             | 2 (3.9%)                      | 0 (0%)                      |
| 1 (atypical)                                              | 32 (22.2%)         | 28 (25.5%)         | 4 (11.8%)          | 15 (29.4%)                    | 17 (19.1%)                  |
| 2 (single words)                                          | 64 (44.4%)         | 50 (45.5%)         | 14 (41.2%)         | 19 (37.3%)                    | 43 (48.3%)                  |
| 3 (absent)                                                | 46 (31.9%)         | 30 (27.3%)         | 16 (47.1%)         | 15 (29.4%)                    | 29 (32.6%)                  |
| <b>IQ level (non verbal) [n (%)]</b>                      |                    |                    |                    |                               |                             |
| normal                                                    | 42 (29.2%)         | 35 (31.8%)         | 7 (20.6%)          | 13 (25.5%)                    | 27 (30.3%)                  |
| borderline                                                | 21 (14.6%)         | 16 (14.5%)         | 5 (14.7%)          | 6 (11.8%)                     | 15 (16.9%)                  |
| mild ID                                                   | 36 (25%)           | 27 (24.5%)         | 9 (26.5%)          | 12 (23.5%)                    | 24 (27.0%)                  |
| moderate ID                                               | 29 (20.1%)         | 22 (20%)           | 7 (20.6%)          | 12 (23.5%)                    | 16 (18.0%)                  |
| severe/profound ID                                        | 16 (11.1%)         | 10 (9.1%)          | 6 (17.6%)          | 8 (15.7%)                     | 7 (7.9%)                    |
| <b>Epilepsy [n (%)]</b>                                   | 12 (8.3%)          | 7 (6.4%)           | 5 (14.7%)          | 3 (5.9%)                      | 7 (7.9%)                    |
| <b>EEG [n (%)]</b>                                        |                    |                    |                    |                               |                             |
| Not assessed                                              | 18 (12.5%)         | 13 (11.8%)         | 5 (14.7%)          | 10 (19.6%)                    | 8 (9.0%)                    |
| Normal                                                    | 96 (66.7%)         | 75 (68.2%)         | 21 (61.8%)         | 30 (58.8%)                    | 63 (70.8%)                  |
| Anomalies                                                 | 30 (20.8%)         | 22 (20.0%)         | 8 (23.5%)          | 11 (21.6%)                    | 18 (20.2%)                  |
| <b>MRI [n (%)]</b>                                        |                    |                    |                    |                               |                             |
| Not assessed                                              | 19 (13.2%)         | 13 (11.8%)         | 6 (17.6%)          | 13 (25.5%)                    | 6 (6.7%)                    |
| Normal                                                    | 89 (61.8%)         | 70 (63.6%)         | 19 (55.9%)         | 29 (56.9%)                    | 56 (62.9%)                  |
| Anomalies                                                 | 36 (25.0%)         | 27 (24.5%)         | 9 (26.5%)          | 9 (17.6%)                     | 27 (30.3%)                  |

**Supplementary Table 2: Analysis of subclinical features using BAPQ and SCDC scores**

**a) BAPQ total score distribution.**

|                                       | Count | Mean | Standard Deviation | Range     | two-sided t-test <i>p</i> -value |
|---------------------------------------|-------|------|--------------------|-----------|----------------------------------|
| <b>Mother (all)</b>                   | 99    | 2.44 | 0.47               | 1.33-3.69 |                                  |
| <i>Multiplex families</i>             | 23    | 2.46 | 0.50               | 1.33-3.61 | 0.755                            |
| <i>Simplex families</i>               | 74    | 2.43 | 0.47               | 1.44-3.69 |                                  |
| <i>ASD male only families</i>         | 70    | 2.45 | 0.46               | 1.44-3.69 | 0.644                            |
| <i>ASD female containing families</i> | 29    | 2.40 | 0.50               | 1.33-3.69 |                                  |
| <b>Father (all)</b>                   | 100   | 2.50 | 0.58               | 1.31-4.31 |                                  |
| <i>Multiplex families</i>             | 24    | 2.59 | 0.65               | 1.53-4.11 | 0.422                            |
| <i>Simplex families</i>               | 74    | 2.48 | 0.57               | 1.31-4.31 |                                  |
| <i>ASD male only families</i>         | 70    | 2.49 | 0.61               | 1.31-4.31 | 0.792                            |
| <i>ASD female containing families</i> | 30    | 2.53 | 0.53               | 1.61-3.44 |                                  |

**b) SCDC score distribution.**

|                                                    | Count | Mean | Standard Deviation | Range | two-sided t-test <i>p</i> -value |
|----------------------------------------------------|-------|------|--------------------|-------|----------------------------------|
| <i>Father (all)</i>                                | 100   | 3.2  | 3.40               | 0-15  | 0.522                            |
| <i>Mother (all)</i>                                | 101   | 2.9  | 2.98               | 0-16  |                                  |
| <i>Parents from multiplex families</i>             | 49    | 3.6  | 3.67               | 0-15  | 0.142                            |
| <i>Parents from simplex families</i>               | 148   | 2.9  | 3.02               | 0-16  |                                  |
| <i>ASD males</i>                                   | 96    | 14.2 | 4.45               | 4-24  | 0.522                            |
| <i>ASD females</i>                                 | 32    | 14.8 | 4.77               | 4-23  |                                  |
| <i>ASD individuals from multiplex families</i>     | 51    | 14.3 | 4.41               | 4-24  | 0.835                            |
| <i>ASD individuals from simplex families</i>       | 73    | 14.1 | 4.53               | 4-23  |                                  |
| <i>Unaffected brothers</i>                         | 27    | 4.2  | 3.86               | 0-14  | 0.734                            |
| <i>Unaffected sisters</i>                          | 25    | 3.8  | 3.45               | 0-13  |                                  |
| <i>Unaffected siblings from multiplex families</i> | 6     | 5.0  | 5.02               | 0-13  | 0.533                            |
| <i>Unaffected siblings from simplex families</i>   | 44    | 4.0  | 3.47               | 0-14  |                                  |

**Supplementary Table 3: Distribution of rare *de novo* variants**

| Group                   | This study |                        | Group                     | Satterstrom et al, 2020  |
|-------------------------|------------|------------------------|---------------------------|--------------------------|
|                         | 144 cases  | 55 unaffected siblings |                           | 6430 cases (Family-data) |
| PTV (LOEUF<0.6)         | 8 (5.1%)   | 0                      | PTV (pLI≥0.995)           | 366 (5.1%)               |
| PTV (LOEUF≥0.6)         | 11 (6.9%)  | 4 (7.0%)               | PTV_Middle(pLI=0.5-0.995) | 164 (2.3%)               |
| DmisB (MPC≥2)           | 11 (6.9%)  | 4 (7.0%)               | PTV_Lowest(pLI=0-0.5)     | 442 (6.2%)               |
| DmisA (1≤MPC<2)         | 18 (11.3%) | 9 (15.8%)              | DmisB (MPC≥2)             | 354 (5.0%)               |
| Missense_Lowest (MPC<1) | 69 (43.4%) | 19 (33.3%)             | DmisA (1≤MPC<2)           | 894 (12.5%)              |
| Synonymous              | 42 (26.4%) | 21 (36.8%)             | Missense_Lowest (MPC<1)   | 3155 (44.2%)             |
| Total                   | 159        | 57                     | Synonymous                | 1756 (24.6%)             |
|                         |            |                        | Total                     | 7131                     |

Supplementary Table 4: List of de novo pSNVs identified in affected individuals (extended version of Table 1)

| Genomic change (hg38) | Gene     | ASD/NDD gene list <sup>1</sup> | Amino acid change <sup>2</sup>            | GnomAD <sup>3</sup> non-neuro <sup>4</sup> max AF (v.2.1.1/v.3.1.2) | pSNVs class (LOEUF/MPC score) | ACMG classification <sup>3</sup> | AlphaMissense prediction | peft score brain (mean proportion) <sup>4</sup> | OMIM disease <sup>5</sup>                                                                                                                                                                                                   | Animal models with neurological phenotypes (#= from OMIM; #= from IMPC)                                                                                                                                                                                                                                                                                                                                    | Individual (Family structure) <sup>6</sup> | Symptoms Onset Pattern (Ozonoff); ADOS-2 (Diagnosis, comparison score); CAR52-ST score; Language level; ID level (test, score); Epilepsy <sup>7</sup> |
|-----------------------|----------|--------------------------------|-------------------------------------------|---------------------------------------------------------------------|-------------------------------|----------------------------------|--------------------------|-------------------------------------------------|-----------------------------------------------------------------------------------------------------------------------------------------------------------------------------------------------------------------------------|------------------------------------------------------------------------------------------------------------------------------------------------------------------------------------------------------------------------------------------------------------------------------------------------------------------------------------------------------------------------------------------------------------|--------------------------------------------|-------------------------------------------------------------------------------------------------------------------------------------------------------|
| 1:111695356-C-T       | RAP1A    | -                              | NM_002884.4:c.73C>T;p.Q25X                | novel                                                               | PTV <sub>LOEUF</sub> (0.433)  | P (PVS1,PS2,PM2,PP3)             | -                        | 0.96 (0.96)                                     | -                                                                                                                                                                                                                           | -                                                                                                                                                                                                                                                                                                                                                                                                          | 69.3 (69: f/m/aM)                          | Early Onset; ADOS-2 (Autism, 9); CAR52-ST: 41.5; Absent speech; Moderate ID (NA); Focal epilepsy                                                      |
| 1:178457852-C-T       | RASAL2   | -                              | NM_170692.4:c.2560C>T;p.Q854X             | novel                                                               | PTV <sub>LOEUF</sub> (0.552)  | LP (PS2,PM2,PP3)                 | -                        | 0.92 (0.84)                                     | -                                                                                                                                                                                                                           | knock-out mouse (Dickinson et al. 2016 §)                                                                                                                                                                                                                                                                                                                                                                  | 19.3 (19: f/m/aM)                          | Early Onset; ADOS-2 (Autism, 6); CAR52-ST: 42.5; Absent speech; Mild ID (NA); No epilepsy                                                             |
| 2:165091265-G-A       | SCN3A    | NDD                            | NM_006922.4:c.4888C>T;p.R1630X            | novel                                                               | PTV <sub>LOEUF</sub> (0.348)  | LP (PS2,PM2,PP3,BS4)             | -                        | 0.95 (0.98)                                     | Developmental and epileptic encephalopathy 62 (617938, AD) Epilepsy, familial focal, with variable foci 4 (617935, AD)                                                                                                      | knock-down mouse (Lamar et al. 2017 #)                                                                                                                                                                                                                                                                                                                                                                     | 40.3 (40: f/m/aM/aM)                       | Mixed; ADOS-2 (Autism, 9); CAR52-ST: 37.5; Single words; Normal IQ (Leiter-R, Brief IQ 117, Fluid Reasoning 108); No epilepsy                         |
| 2:165374892-C-T       | SCN2A    | ASD                            | NM_001040142.2:c.4180C>T;p.Q1394X         | novel                                                               | PTV <sub>LOEUF</sub> (0.161)  | P (PVS1,PS2,PM2,PP3,BS4)         | -                        | 0.99 (0.99)                                     | Episodic ataxia, type 9 (618924, AD) Seizures, benign familial infantile, 3 (607745, AD)                                                                                                                                    | knock-out mouse (Planells-Cases et al. 2000 #); overexpressing mouse (Li et al. 2021 #)                                                                                                                                                                                                                                                                                                                    | 113.4 (113: f/m/aF/aM/uF)                  | Early Onset; ADOS-2 (Autism, 10); CAR52-ST: 43; Absent speech; Severe ID (NA); No epilepsy                                                            |
| 8:102265260delG       | UBR5     | ASD                            | NM_015902.6:c.7441del;p.H2481Mfs*7        | novel                                                               | PTV <sub>LOEUF</sub> (0.073)  | LP (PVS1,PS2,PM2,BS4)            | -                        | 0.46 (0.5)                                      | -                                                                                                                                                                                                                           | -                                                                                                                                                                                                                                                                                                                                                                                                          | 110.3 (110: f/m/aM/aM/uMs)                 | Early Onset; ADOS-2 (Autism, 6); CAR52-ST: 37; Atypical language; Borderline IQ (Leiter-R, Brief IQ 74); No epilepsy                                  |
| 11:1454559delAC       | BRSK2    | ASD                            | NM_001256627.2:c.1620_1621del;p.D540Efs*9 | novel                                                               | PTV <sub>LOEUF</sub> (0.361)  | P (PVS1,PS2,PM2)                 | -                        | 0.69 (0.1)                                      | -                                                                                                                                                                                                                           | -                                                                                                                                                                                                                                                                                                                                                                                                          | 32.3 (32: f/m/aM/uM)                       | Early Onset; ADOS-2 (Autism, 6); CAR52-ST: 39.5; Single words; Normal IQ (Leiter-R, Brief IQ 96, Fluid Reasoning 108); No epilepsy                    |
| 16:54931226-C-T       | IRX5     | -                              | NM_005853.6:c.28C>T;p.Q10X                | novel                                                               | PTV <sub>LOEUF</sub> (0.413)  | P (PVS1,PS2,PM2,PP3)             | -                        | 0.98 (0.93)                                     | Hamamy syndrome (611174, AR)                                                                                                                                                                                                | knock-out mouse (Costantini et al. 2005 #); overexpressing zebrafish (Kohl et al. 2021 #)                                                                                                                                                                                                                                                                                                                  | 102.3 (102: f/m/aM)                        | Early Onset; ADOS-2 (Autism, 10); CAR52-ST: 39; Atypical language; Borderline IQ (NA); No epilepsy                                                    |
| 22:50720258-G-T       | SHANK3   | ASD                            | NM_001372044.2:c.2611G>T;p.E871X          | novel                                                               | PTV <sub>LOEUF</sub> (0.428)  | P (PVS1,PM2,PM6,PP3)             | -                        | 1 (1)                                           | Schizophrenia 15 (613950, AD) Phelan-McDermid syndrome (606232, AD)                                                                                                                                                         | knock-out mouse (Peça et al. 2011, Wang et al. 2011, Bidinosti et al. 2016 #), knock-out mouse with conditional knock-in (adulthood) (Mei et al. 2016 #), overexpressing mouse (Han et al. 2013 #)                                                                                                                                                                                                         | 123.3 (123: f/aE)                          | Early Onset; ADOS-2 (Autism, 9); CAR52-ST: 43.5; Absent speech; Severe ID (NA); No epilepsy                                                           |
| 22:50730801-C-A       | SHANK3   | ASD                            | NM_001372044.2:c.4871C>A;p.S1624X         | novel                                                               | PTV <sub>LOEUF</sub> (0.428)  | LP (PS2,PM2,PP3)                 | -                        | 1 (1)                                           | Schizophrenia 15 (613950, AD) Phelan-McDermid syndrome (606232, AD)                                                                                                                                                         | knock-out mouse (Peça et al. 2011, Wang et al. 2011, Bidinosti et al. 2016 #), knock-out mouse with conditional knock-in (adulthood) (Mei et al. 2016 #), overexpressing mouse (Han et al. 2013 #)                                                                                                                                                                                                         | 29.3 (29: f/m/aE/uM)                       | Early Onset; ADOS-2 (Autism, 8); CAR52-ST: 43; Absent speech; Profound ID (GMDS 0-2, CA 11 years, total AE 12.75 months); Focal epilepsy              |
| 1:27107758-T-C        | SLC9A1   | -                              | NM_003047.5:c.1172A>G;p.E391G             | novel                                                               | DmisB (MPC=2.3)               | LP (PS2,PM1,PM2,PP2)             | Likely pathogenic        | 0.39 (0.53)                                     | Lichtenstein-Knorr syndrome (107310, AR)                                                                                                                                                                                    | spontaneous knock-out mouse (Cox et al. 1997 #)                                                                                                                                                                                                                                                                                                                                                            | 98.3 (98: f/m/aM)                          | Early Onset; ADOS-2 (Autism, 10); CAR52-ST: 42; Single words; Borderline IQ (Leiter-R, Brief IQ 76, Fluid Reasoning 84); No epilepsy                  |
| 10:27114547-C-T       | YME1L1   | -                              | NM_014263.4:c.1981G>A;p.E661K             | novel                                                               | DmisB (MPC=2.0)               | LP (PS2,PM1,PM2,PP3,BS4)         | Likely pathogenic        | 0.98 (0.98)                                     | -                                                                                                                                                                                                                           | -                                                                                                                                                                                                                                                                                                                                                                                                          | 117.3 (117: f/m/aM/aF)                     | Early Onset; ADOS-2 (Autism, 9); CAR52-ST: 35.5; Atypical language; Mild ID (WPPSI-III, Verbal IQ 80, Performance IQ 65, Total IQ 66); Focal epilepsy |
| 11:1442548-G-A        | BRSK2    | ASD                            | NM_001256627.2:c.472G>A;p.A158T           | novel <sup>9</sup>                                                  | DmisB (MPC=2.0)               | LP (PS2,PM1,PM2,BS4)             | Likely pathogenic        | 0.37 (0.18)                                     | -                                                                                                                                                                                                                           | -                                                                                                                                                                                                                                                                                                                                                                                                          | 14.4 (14: f/m/aM/aM)                       | Early Onset; ADOS-2 (Autism, 8); CAR52-ST: 39; Absent speech; Moderate ID (NA); No epilepsy                                                           |
| 11:47419145-C-T       | PSMC3    | NDD                            | NM_002804.5:c.1180G>A;p.A394T             | novel                                                               | DmisB (MPC=2.1)               | LP (PS2,PM1,PM2,PP3)             | Likely pathogenic        | 0.85 (0.85)                                     | Deafness, cataract, impaired intellectual development, and polyneuropathy(619354, AR) Charcot-Marie-Tooth disease, axonal, type 20 (614228, AD) Cortical dysplasia, complex, with other brain malformations 13 (614563, AD) | Zebrafish knock-out (Kroll-Hermi et al. 2020 #)                                                                                                                                                                                                                                                                                                                                                            | 106.3 (106: f/m/aM)                        | Early Onset; ADOS-2 (Autism, 9); CAR52-ST: 42.5; Absent speech; Severe ID (NA); No epilepsy                                                           |
| 14:102016376-T-C      | DYNC1H1  | ASD                            | NM_001376.5:c.7501T>C;p.S2501P            | novel                                                               | DmisB (MPC=2.5)               | LP (PS2,PM2)                     | Likely pathogenic        | 0.14 (0.16) <sup>10</sup>                       | Spinal muscular atrophy, lower extremity-predominant 1 (158600, AD)                                                                                                                                                         | chemically-induced missense variants mice (Hafezparast et al. 2003, Braunstein et al. 2010, Eschbach et al. 2013, Ori-McKenney and Vallee 2011 #)                                                                                                                                                                                                                                                          | 122.3 (122: f/m/aM)                        | Early Onset; ADOS-2 (Autism, 9); CAR52-ST: 36; Single words; Normal IQ (NA); No epilepsy                                                              |
| 15:62494968-C-T       | RAB8B    | -                              | NM_016530.3:c.227C>T;p.A76V               | /0.000016                                                           | DmisB (MPC=2.1)               | LP (PS2,PM1,PM2,PP3,BS4)         | Likely pathogenic        | 1 (0.99)                                        | -                                                                                                                                                                                                                           | -                                                                                                                                                                                                                                                                                                                                                                                                          | 85.3 (85: f/m/aM/aM)                       | Mixed; ADOS-2 (Autism, 7); CAR52-ST: 45; Absent speech; Moderate ID (NA); No epilepsy                                                                 |
| 17:76926616-G-A       | MGAT5B   | -                              | NM_001199172.2:c.1177G>A;p.D393N          | /0.000016                                                           | DmisB (MPC=2.0)               | LP (PS2,PM1,PM2,PP3,BS4)         | Likely pathogenic        | 0.38 (0.12) <sup>10</sup>                       | -                                                                                                                                                                                                                           | -                                                                                                                                                                                                                                                                                                                                                                                                          | 15.3 (15: f/m/aM/aM)                       | Early Onset; ADOS-2 (Autism, 9); CAR52-ST: 42.5; Single words; Normal IQ (Leiter-R, Brief IQ 89, Fluid Reasoning 84); No epilepsy                     |
| 19:839920-G-A         | RAB11B   | NDD                            | NM_004218.4:c.98G>A;p.R33H                | novel                                                               | DmisB (MPC=2.6)               | LP (PS2,PM1,PM2,PP2)             | Likely pathogenic        | 1 (1)                                           | Neurodevelopmental disorder with ataxic gait, absent speech, and decreased cortical white matter (617807, AD)                                                                                                               | -                                                                                                                                                                                                                                                                                                                                                                                                          | 52.3 (52: f/m/aM)                          | Early Onset; ADOS-2 (Autism, 6); CAR52-ST: 39; Single words; Mild ID (Leiter-R, Brief IQ 56, Fluid Reasoning 63); Focal epilepsy                      |
| 19:13025217-T-C       | NFIX     | NDD                            | NM_001365902.3:c.224T>C;p.L75P            | novel                                                               | DmisB (MPC=3.3)               | LP (PS2,PM1,PM2,PP3,BP1)         | Likely pathogenic        | 0.98 (0.99)                                     | Malan syndrome (614753, AD) Marshall-Smith syndrome (602535, AD)                                                                                                                                                            | knock-out and knock-down mice (Driller et al. 2007, Campbell et al. 2008, Harris et al. 2013, Zhou et al. 2015 #)                                                                                                                                                                                                                                                                                          | 81.3 (81: f/m/aM/uM)                       | Early Onset; ADOS-2 (Autism, 10); CAR52-ST: 39.5; Absent speech; Severe ID (GMDS 0-2, CA 34 months, total AE 10 months); No epilepsy                  |
| 21:43970678-G-A       | AGPAT3   | -                              | NM_020132.5:c.536G>A;p.R179H              | novel                                                               | DmisB (MPC=2.2)               | LP (PS2,PM1,PM2,PP3)             | Likely pathogenic        | 0.94 (0.86)                                     | -                                                                                                                                                                                                                           | -                                                                                                                                                                                                                                                                                                                                                                                                          | 17.3 (17: f/m/aM/uM)                       | Regressive; ADOS-2 (Autism, 9); CAR52-ST: 37; Single words; Mild ID (Leiter-R, Full IQ 57, Fluid Reasoning 48); No epilepsy                           |
| 22:39488750-C-T       | MGAT3    | -                              | NM_002409.5:c.1403C>T;p.T468M             | 0/0.000067                                                          | DmisB (MPC=2.2)               | LP (PS2,PM2)                     | Likely benign            | 0.99 (0.99)                                     | -                                                                                                                                                                                                                           | -                                                                                                                                                                                                                                                                                                                                                                                                          | 5.3 (5: f/m/aM)                            | Early Onset; ADOS-2 (Autism, 5); CAR52-ST: 39.5; Single words; Borderline IQ (Leiter-R, Brief IQ 79, Fluid Reasoning 62); No epilepsy                 |
| 1:26950738-G-A        | KDF1     | -                              | NM_152365.3:c.1058C>T;p.S533F             | novel                                                               | DmisA (MPC=1.0)               | LP (PS2,PM2,PP2)                 | Likely pathogenic        | 1 (1)                                           | -                                                                                                                                                                                                                           | -                                                                                                                                                                                                                                                                                                                                                                                                          | 81.3 (81: f/m/aM/uM)                       | Early Onset; ADOS-2 (Autism, 10); CAR52-ST: 39.5; Absent speech; Severe ID (GMDS 0-2, CA 34 months, total AE 10 months); No epilepsy                  |
| 1:52033586-C-T        | K71L2    | -                              | NM_138417.3:c.176G>A;p.R59H               | novel                                                               | DmisA (MPC=1.7)               | LP (PS2,PM2,PP3,BS4)             | Likely pathogenic        | 1 (1)                                           | -                                                                                                                                                                                                                           | -                                                                                                                                                                                                                                                                                                                                                                                                          | 16.4 (16: f/m/aM/aM)                       | Early Onset; ADOS-2 (Autism, 9); CAR52-ST: 39; Absent speech; Moderate ID (PEP-3, CA 2.7 years, cognitive-verbal AE <12 months); No epilepsy          |
| 2:196317282-A-G       | HECW2    | NDD                            | NM_001348768.2:c.2426T>C;p.L809P          | novel                                                               | DmisA (MPC=1.3)               | P (PS2,PM1,PM2,PP2,PP3)          | Likely pathogenic        | 1 (0.99)                                        | Neurodevelopmental disorder with hypotonia, seizures, and absent language (617268, AD)                                                                                                                                      | -                                                                                                                                                                                                                                                                                                                                                                                                          | 68.3 (68: f/m/aE/uF/uM)                    | Mixed; ADOS-2 (Autism, 10); CAR52-ST: 38.5; Absent speech; Borderline IQ (Leiter-R, Brief IQ 74, Fluid Reasoning 73); No epilepsy                     |
| 2:241742460-G-A       | D2HGDH   | -                              | NM_152783.5:c.376G>A;p.V126M              | 0.000056/0.000143                                                   | DmisA (MPC=1.2)               | LP (PS2,PM1,PM2,PP3)             | Ambiguous                | 0.42 (0.31)                                     | D-2-hydroxyglutaric aciduria (600721, AR)                                                                                                                                                                                   | -                                                                                                                                                                                                                                                                                                                                                                                                          | 87.3 (87: f/m/aM/uM)                       | Early Onset; ADOS-2 (Autism, 6); CAR52-ST: 40.5; Single words; Mild ID (Bayley-III, CA 38 months, equivalent age 19 months); No epilepsy              |
| 3:186786601-G-A       | EIF4A2   | NDD                            | NM_001967.4:c.727A>G;p.T243A              | novel                                                               | DmisA (MPC=1.7)               | LP (PS2,PM1,PM2,BS4)             | Likely pathogenic        | 0.77 (0.64)                                     | Neurodevelopmental disorder with hypotonia and speech delay, with or without seizures(620455; AD/AR)                                                                                                                        | missense mutation induced in <i>Drosophila</i> (Paul et al. 2023 #)                                                                                                                                                                                                                                                                                                                                        | 110.4 (110: f/m/aM/aM/uMs)                 | Early Onset; ADOS-2 (ASD, 4); CAR52-ST: 33; Atypical language; Normal IQ (Leiter-R, Brief IQ 107, Fluid Reasoning 102); No epilepsy                   |
| 6:122997919-C-G       | CLVS2    | -                              | NM_001010852.4:c.142C>G;p.R48G            | novel                                                               | DmisA (MPC=1.3)               | LP (PS2,PM1,PM2)                 | Likely pathogenic        | 1 (0.98)                                        | -                                                                                                                                                                                                                           | -                                                                                                                                                                                                                                                                                                                                                                                                          | 44.3 (44: f/m/aM/uF)                       | Early Onset; ADOS-2 (Autism, 7); CAR52-ST: 45; Single words; Mild ID (Leiter-R, Brief IQ 54, Fluid Reasoning 52); No epilepsy                         |
| 9:132904429-C-A       | TSC1     | ASD                            | NM_000368.5:c.2023G>T;p.D675Y             | novel                                                               | DmisA (MPC=1.6)               | LP (PS2,PM1,PM2,PP3)             | Likely pathogenic        | 0.9 (0.79)                                      | Focal cortical dysplasia, type II, somatic (607341) Tuberosclerosis-1 (191100, AD) Lymphangioliomyomatosis (606690)                                                                                                         | Knock-out and knock-down mice (Kobayashi et al. 2001, Kwiatkowski et al. 2002, Uhlmann et al. 2002, Goorden et al. 2007 #), conditional knock-out mouse (glia) (Zeng et al. 2008), conditional knock-out mouse (adulthood) (Abs et al. 2013), conditional knock-out mouse (Purkinje cells) (Tsai et al. 2012), conditional knock-out mouse (developing mouse neurons) (Lim et al. 2017, Ercan et al. 2017) | 100.3 (100: f/m/aF)                        | Early Onset; ADOS-2 (Autism, 9); CAR52-ST: 40; Single words; Mild ID (NA); No epilepsy                                                                |
| 10:91482997-G-A       | HECTD2   | -                              | NM_182765.6:c.742G>A;p.V248I              | novel                                                               | DmisA (MPC=1.0)               | LP (PS2,PM1,PM2)                 | Likely benign            | 0.31 (0.53)                                     | -                                                                                                                                                                                                                           | knock-out mouse (Dickinson et al. 2016 §)                                                                                                                                                                                                                                                                                                                                                                  | 30.3 (30: f/m/aM/uM)                       | Early Onset; ADOS-2 (Autism, 9); CAR52-ST: 41.5; Absent speech; Moderate ID (PEP-3, CA 3 years, cognitive-verbal AE 17 months); No epilepsy           |
| 10:96551263-G-A       | TM5SF3   | -                              | NM_020123.4:c.941T>C;p.I314T              | novel                                                               | DmisA (MPC=1.2)               | LP (PS2,PM2,BS4)                 | Likely benign            | 1 (0.96)                                        | -                                                                                                                                                                                                                           | -                                                                                                                                                                                                                                                                                                                                                                                                          | 12.5 (12: f/m/aM/uM/aM)                    | Early Onset; ADOS-2 (Autism, 6); CAR52-ST: 33.5; Single words; Mild ID (GMDS 0-2, CA 17 months, total AE 11 months); No epilepsy                      |
| 13:41192409-G-A       | K8TBD7   | NDD                            | NM_032138.7:c.1849C>T;p.R617C             | 0.000206/0.00031                                                    | DmisA (MPC=1.9)               | VUS (PS2,PP3,BS4)                | Ambiguous                | 1 (1)                                           | -                                                                                                                                                                                                                           | knock-out mouse (Dickinson et al. 2016 §)                                                                                                                                                                                                                                                                                                                                                                  | 40.4 (40: f/m/aM/aM)                       | Mixed; ADOS-2 (Autism, 8); CAR52-ST: 34.5; Atypical language; Normal IQ (Leiter-R, Brief IQ 111, Fluid Reasoning 88); No epilepsy                     |
| 14:73103376-G-A       | RBM25    | -                              | NM_021239.3:c.1052G>A;p.R351H             | 0.000034/                                                           | DmisA (MPC=1.3)               | LP (PS2,PM1,PM2)                 | Ambiguous                | 0.74 (0.66)                                     | -                                                                                                                                                                                                                           | knock-out mouse (Dickinson et al. 2016 §)                                                                                                                                                                                                                                                                                                                                                                  | 60.3 (60: f/m/aE)                          | Early Onset; ADOS-2 (Autism, 10); CAR52-ST: 48; Single words; Moderate ID (PEP-3, CA 5.6 years, cognitive-verbal AE 36 months); No epilepsy           |
| 15:90957365-C-A       | RCCD1    | -                              | NM_001017919.2:c.419C>A;p.A140D           | novel                                                               | DmisA (MPC=1.6)               | VUS (PS2,PM1,PM2,BS4,BP4)        | Likely benign            | 0.7 (0.57)                                      | -                                                                                                                                                                                                                           | knock-out mouse (Dickinson et al. 2016 §)                                                                                                                                                                                                                                                                                                                                                                  | 117.4 (117: f/m/aM/aE)                     | Early Onset; ADOS-2 (Autism, 8); CAR52-ST: 34.5; Single words; Normal IQ (Leiter-3, IQ 97); No epilepsy                                               |
| 17:2670194-G-A        | PAFAH1B1 | NDD                            | NM_000430.4:c.431G>A;p.R144Q              | novel                                                               | DmisA (MPC=1.6)               | LP (PS2,PM1,PM2,BS4)             | Ambiguous                | 0.91 (0.72)                                     | Lissencephaly 1 (607432, AD) Subcortical laminar heterotopia (607432, AD)                                                                                                                                                   | knock-out and knock-down mice (Hirotsune et al. 1998, Assadi et al. 2003, Pawlitz et al. 2008, Yamada et al. 2009, Greenwood et al. 2009 #), start-loss mutation induced in mouse (Cahana et al. 2001 #), knock-out induced in <i>Drosophila</i> (Liu et al. 2000 #), knock-out and knock-down in <i>C. elegans</i> (Williams et al. 2004 #)                                                               | 15.4 (15: f/m/aM/aM)                       | Early Onset; ADOS-2 (Autism, 6); CAR52-ST: 33; Normal language; Borderline IQ (WISC-IV, Full IQ 78); No epilepsy                                      |
| 17:7323905-C-T        | NEURL4   | -                              | NM_032442.3:c.2170G>A;p.G745              | 0.000011/0.00001                                                    | DmisA (MPC=1.5)               | LP (PS2,PM1,PM2,PP3,BS4)         | Likely pathogenic        | 0.36 (0.35)                                     | -                                                                                                                                                                                                                           | knock-out mouse (Dickinson et al. 2016 §)                                                                                                                                                                                                                                                                                                                                                                  | 115.3 (115: f/m/aE/aM/aF)                  | Early Onset; ADOS-2 (Autism, 6); CAR52-ST: 36; Single words; Moderate ID (GMDS, CA 27 months, total AE 5.5 months); No epilepsy                       |

|                 |               |   |                                |                  |                 |                             |                   |             |                                                                                                                            |                                         |                                |                                                                                                                                           |
|-----------------|---------------|---|--------------------------------|------------------|-----------------|-----------------------------|-------------------|-------------|----------------------------------------------------------------------------------------------------------------------------|-----------------------------------------|--------------------------------|-------------------------------------------------------------------------------------------------------------------------------------------|
| 17:75496430-C-T | <i>TMEM94</i> | - | NM_014738.6:c.3202C>T:p.R1068C | 0.000062/0.00011 | DmisA (MPC=1.2) | LP<br>(PS2,PM1,BP1)         | Likely benign     | 0.32 (0.3)  | Intellectual developmental disorder with cardiac defects and dysmorphic facies (618316, AR)                                | knock-out mouse (Stephen et al. 2018 #) | 101.3<br>(101: f/m/aM)         | Early Onset; ADOS-2 (ASD, 4); CARS2-ST: 36.5; Absent speech; Moderate ID (GMDS, CA 43 months, total AE 21.5 months); No epilepsy          |
| 17:10528976-C-T | <i>MYH2</i>   | - | NM_017534.6:c.3458G>A:p.S1153N | novel            | DmisA (MPC=1.0) | LP<br>(PS2,PM1,PM2,PP3,BS4) | Likely pathogenic | 1 (1)       | Congenital myopathy 6 with ophthalmoplegia (605637, AD/AR)                                                                 | -                                       | 77.3<br>(77: f/m/aM/aF/uM/uFs) | Early Onset; ADOS-2 (Autism, 9); CARS2-ST: 41.5; Single words; Mild ID (Leiter-R, NA); No epilepsy                                        |
| 20:42677943-C-T | <i>PTPRT</i>  | - | NM_007050.6:c.1076G>A:p.R359Q  | 0.000033/0.00006 | DmisA (MPC=1.2) | LP<br>(PS2,PM1)             | Likely benign     | 1 (1)       | -                                                                                                                          | -                                       | 72.3<br>(72: f/m/aE/uF)        | Early Onset; ADOS-2 (Autism, 6); CARS2-ST: 34; Single words; Mild ID (Leiter-R, NA); No epilepsy                                          |
| 22:42693390-C-T | <i>A4GALT</i> | - | NM_017436.7:c.562G>A:p.G188S   | 0.000062/0.00056 | DmisA (MPC=1.1) | LP<br>(PS2,PM1,PM2,PP3)     | Likely pathogenic | 0.95 (0.94) | NOR polyagglutination syndrome / Blood group, P1Pk system, P(2) phenotype / Blood group, P1Pk system, p phenotype (111400) | -                                       | 90.3<br>(90: f/m/aE/dM)        | Early Onset; ADOS-2 (Autism, 9); CARS2-ST: 41; Absent speech; Moderate ID (PEP-3, CA 4 years, cognitive-verbal AE 24 months); No epilepsy |

*De novo* pdsNVs include PTVs in genes with LOEUF score <0.6 (PTV<sub>LOEUF</sub>), missense variants with MPC score ≥2 (DmisB) and missense variants with 1SMPC<2 (DmisA). <sup>1</sup> High-confidence ASD/NDD gene list classification according to Table S8; <sup>2</sup> Amino acid changes are reported according to the MANE isoform; <sup>3</sup> Classification of genetic variants according to the ACMG guidelines, together with detailed evidence codes, was performed using InterVar. Abbreviations: P, pathogenic; LP, likely pathogenic; VUS, variant of uncertain significance; <sup>4</sup> The reported brain pext score is the mean value of the 13 GTEx brain tissues; <sup>5</sup> Only established OMIM diseases are reported; <sup>6</sup> Probands are indicated with an identifier code formed by the family number and the individual number. In brackets, the family structure is reported with children listed sequentially after the father and the mother, according to the recruitment order. The affected individual heterozygote for the variant is underlined. Abbreviations: f, father; m, mother; r, relative (uncle); a, affected; u, unaffected; M, male; F, female; <sup>7</sup> Epilepsy is present only where it is explicitly indicated. Abbreviations: EO, Early Onset; NA, Not Assessed; V-IQ, Verbal IQ; P-IQ, Performance IQ; B-IQ, Brief IQ; FR, Fluid Reasoning; CA, chronological age; AE, age equivalent; GMDS, Griffiths Mental Development Scales; m, months; y, years; <sup>8</sup> Since DNA of the biological mother was unavailable, *de novo* status was only assumed; <sup>9</sup> This variant has been reported in gnomAD v3.1.2 in a single individual of African/African American origin belonging to the gnomAD "neuro" dataset, therefore the variant is not present in gnomAD v3.1.2 "non-neuro" dataset. <sup>10</sup> For this gene, RSEM assigns higher expression to non-coding transcripts than protein coding transcripts. This likely represents an artifact in the isoform expression quantification and results in a low pext value for all bases of this gene.

**Supplementary Table 5: Gene ontology from 17 genes carrying the 19 most severe *de novo* pdSNVs identified in 144 cases**

| Term ID    | GO biological process description | # genes (Reference list) | # genes (Our list) | Expected | Fold Enrichment | P value (Fisher's Exact) | FDR     | Genes (Our list)                                                         |
|------------|-----------------------------------|--------------------------|--------------------|----------|-----------------|--------------------------|---------|--------------------------------------------------------------------------|
| GO:0051049 | regulation of transport           | 1771                     | 10                 | 1.46     | 6.84            | 0.00000025               | 0.00388 | RAB11B, UBR5, BRSK2, SCN2A, SLC9A1, SCN3A, SHANK3, RAB8B, DYNC1H1, RAP1A |
| GO:0032879 | regulation of localization        | 2126                     | 10                 | 1.76     | 5.7             | 0.00000137               | 0.0107  | RAB11B, UBR5, BRSK2, SCN2A, SLC9A1, SCN3A, SHANK3, RAB8B, DYNC1H1, RAP1A |

GO functional enrichment analysis performed using the Annotation Data Set "GO biological process". Only results for FDR  $p < 0.05$  are displayed. The 19 most severe *de novo* pdSNVs include 9 PTV<sub>LOEUF</sub> and 10 DmisB variants.

**Supplementary Table 6 (List of *de novo* and inherited pdSNVs in cases) is available at the end of this file.**



Supplementary Table 7: SynGO Gene Set Enrichment Analysis (GSEA) of genes carrying *de novo* and inherited pdsNVs in 144 cases

a) pdsNVs

| GO term ID            | GO domain | GO term name                                                         | GSEA 'gene cluster' FDR corrected p-value | GSEA count foreground/input | GSEA count background | Genes                                                                                                                                                                                                                                                                                                                                                                                                                                                                                                                                                                                                                                                                                                                                                                                                                                                                                                                                                                                                                                                                                                                                                                                                                                                                                                                                                                                                           |
|-----------------------|-----------|----------------------------------------------------------------------|-------------------------------------------|-----------------------------|-----------------------|-----------------------------------------------------------------------------------------------------------------------------------------------------------------------------------------------------------------------------------------------------------------------------------------------------------------------------------------------------------------------------------------------------------------------------------------------------------------------------------------------------------------------------------------------------------------------------------------------------------------------------------------------------------------------------------------------------------------------------------------------------------------------------------------------------------------------------------------------------------------------------------------------------------------------------------------------------------------------------------------------------------------------------------------------------------------------------------------------------------------------------------------------------------------------------------------------------------------------------------------------------------------------------------------------------------------------------------------------------------------------------------------------------------------|
| GO:0045202            | CC        | synapse                                                              | 1.12E-10                                  | 218                         | 1082                  | FLOT1;CYFIP2;SLC18A1;AGRN;PABPC1;RPL5;RPL6;RPL3;RPS25;SLC6A11;NCAN;PFFIA3;PFFIA4;ARHGDI4;SLC3A2;CLU;DPYSL3;SPARC;SH3GL1;MADD;YWHAG;DVL3;CDH10;RPL3A;RPL23A;RPL30;RPS10;EIF4G3;RPS6KA4;ATP8A1;CDH8;SYT3;ITGB3;ITGB1;PTPRA;FBXO45;RAB8B;CACNB4;DPYSL2;CACNB1;CADPS2;CPEB2;APBB1;SEPTIN3;STXBP5;TNIK;HIP1;ADD2;NOS1AP;ARFGEF2;GRK2;GAD1;GAD2;NECAP1;LRFN2;GAP43;PRKCB;CTBP2;NSF;HTT;ANKS1B;CALB1;GDI1;C1QBP;UNC13A;CNTNAP1;ARHGAP44;CACNA1B;RIMS1;RIMS2;CTNNA2;CTNNB1;CTNND1;APBA1;ATP2B2;ATP2B4;CANX;GRM7;GRIA2;GRIA1;GRIA4;GRIN2B;LPAR2;KCNA1;KCNJ8;GRM4;CACNA1D;NRXN1;NRG1;ITGA3;WDR7;PICK1;RAB3A;RAB11B;RAB4A;DOCA2;ATP6V1B1;SLC6A2;STX12;ATP6VD1;CALCLR;KCNC4;CADM3;EPHB2;ADCY8;SCN2A;SLC6A1;SLC1A6;CACNA1C;SLC6A3;ADGRL1;GRIK5;SCN1A;CDH2;GABBR2;CHRM1;LPAR1;ERBB2;NGFR;ITPR3;ITPR1;LAMB2;NPTX1;C1QL2;ADAM10;BEGAIN;ELAVL1;NCKAP1;APC2;TRIM3;CPEB4;PSD2;EIF4B;PPP1R1B;EIF4G1;GIT1;SIPA1L1;ARHGAP39;CALD1;CNN3;SPTB;SPTAN1;MYO9A;AGAP2;MYO5A;PUM2;ARHGFE2;PLCB1;PLCB3;MTOR;DAG1;KIF5C;NEFH;MYH10;SYNPO;DLGAP3;DLGAP4;NOS1;HTR5A;CHRNA1;CHRN1;KCN2D;NLGN2;NLGN1;PRKCZ;HOMER2;DRP2;PAK3;SHANK2;SHANK3;MAGI2;CTNND2;ADGRA1;PLEKHA5;TSC1;HNRNP1;CAP2B;RAPGEF4;ABL1;NUMB;LZTS3;DAPK1;AGAP3;ITGA3;TANC2;SH3GL3;DLG2;MPP2;LZTS1;GRM1;ADCY1;PLPPR4;GRID1;CNH2;LRFN4;LRR4;LRR4C;PTPRF;PTPRT;DRD3;SORCS3;CACNG7;KCNAB2;IQSEC3;IGSF9B;SH3GL2;RAB11FIP3;CNTN2;TENM2;FBXO2;ADGRB1;NTRK3;DAGLA;GABRD;KCN2D;ITGA5;ITGB4;BCAN |
| SYNGO: synprocess     | BP        | process in the synapse                                               | 1.25E-10                                  | 187                         | 874                   | CALB1;CACNA1B;CACNA1D;CACNB4;GRIK3;GRIK5;GRIA1;GRIA2;GRIA4;GRIN2B;KCNA1;KCNC4;SCN2A;SCN1A;KCNJ8;NECAP1;NSF;STXBP5;NRXN1;ARHGDI4;RAPGEF4;LPAR1;CNTN1B;STX12;UNC13A;STX1B;PFFIA3;DOC2A;RIMS1;RIMS2;PRKCB;GIT1;WNT7A;FBXO45;CTBP2;RAB3A;CADPS2;ATP6VD1;ATP6V1B1;CANX;KIAA1109;TBC1D2;SLC6A11;SLC1A6;SLC6A3;SLC6A1;SLC6A2;FLOT1;DRD3;SYNPO;MYO5A;ATP2B2;ITPR1;GRM1;CHRM1;NOS1;CHRNA1;CHRN1;GABRD;KCN2D;BEGAIN;NPTX1;CNH2;NRXN3;CTNND1;CLPTM1;CTNND2;AGAP3;SNX27;DLG2;CACNG7;C1QL2;ERBB2;PRKCZ;DAG1;MAGI2;TNIK;ADAM10;RAP1A;PAK3;SACM1L1;ITGB3;ITGB1;SH3GL2;IQSEC1;NRG1;PICK1;NUMB;HIP1;ARRB2;NF1;ANKS1B;HTT;DAGL;PLCB1;TENM2;TENM3;TENM4;PLG;ADCY8;ADCY1;EPHB1;CHD2;LRR4C;LRR4C;LRFN2;PTPRA;NCAN;PACSIN2;SHANK3;DLGAP3;ARHGAP44;KCN2D;PAFAH1B1;APBA1;GRM4;GRM7;GRM2;NGFR;SORCS3;NEFH;IGF1R;APBB1;NLGN1;IQSEC3;ARHGAP39;ITGA3;SEMA3F;SHANK2;SPTB;MYH10;NCKAP1;MYO9A;CTNNA2;SPTB;MYH10;NCKAP1;AGRN;SPARC;CDH8;PTPRT;ACTN1;MPP2;LAMB2;IGSF9B;LRFN4;CDH10;MDGA1;PLXND1;ADD2;PFFIA4;EPHB2;NRG2;IL1RAPL2;NTRK3;NLGN2;LZTS3;NUMB;LRR4;GAP43;ABL1;SIPA1L1;PLXNC1;BCAN;ROCK2;CNTNAP1;PLXNA4;ARHGEF7;ADGRB1;NOS1AP;EZR;FBXO2;MTOR;CPEB2;TRIM3;GAD1;GAD2;RPL13A;RPL23A;RPL5;RPL6;RPS10;DPYSL2;KIF5A;KIF17;SFPQ;MADD                                                                                                                                                                                                            |
| GO:0098794            | CC        | postsynapse                                                          | 1.64E-10                                  | 143                         | 621                   | ADAM10;BEGAIN;ELAVL1;NCKAP1;APC2;TRIM3;CPEB2;CPEB4;PSD2;EIF4B;PPP1R1B;EIF4G1;CALB1;GIT1;SIPA1L1;CACNB1;ADD2;NOS1AP;ARHGAP39;ARFGEF2;CALD1;CNN3;SPTB;SPTAN1;MYO9A;AGAP2;MYO5A;PUM2;NRG1;ARHGFE2;LRFN2;FBXO45;PLCB1;PLCB3;HTT;MTOR;DAG1;KIF5C;NEFH;MYH10;SYNPO;DLGAP3;DLGAP4;PICK1;NOS1;HTR5A;CHRNA1;CHRN1;KCN2D;CDH10;NLGN2;NLGN1;PRKCZ;HOMER2;DRP2;PAK3;SHANK2;SHANK3;MAGI2;ANKS1B;CTNND2;RPL5;ADGRA1;PLEKHA5;RPL30;TSC1;RPS25;HNRNP1;RPL6;ARHGAP44;CAP2B;RAPGEF4;ABL1;NUMB;LZTS3;GRK2;DAPK1;AGAP3;CTNNA2;CTNNB1;IQSEC1;TNIK;TANC2;CTNND1;SH3GL1;SH3GL3;DLG2;MPP2;LZTS1;ATP2B2;GRM1;ADCY1;GRIA1;PLPPR4;GRIK5;GRIA2;GRIN2B;GRID1;CNH2;LRFN4;LRR4C;LRR4C;PTPRF;PTPRT;GRIA4;DRD3;CHRM1;SORCS3;CACNG7;KCNAB2;IQSEC3;IGSF9B;SH3GL2;STX12;RAB11FIP3;HIP1;CNTN2;TENM2;FBXO2;KCNCA4;EPHB2;CANX;CACNA1C;SLC6A1;SLC6A11;SLC1A6;SLC6A3;CDH2;GABBR2;ADGRB1;NTRK3;DAGLA;ITGB1;GABRD;KCN2D;ITGA3;ITGA5;ITGB4;LPAR1;RPL13A;RPL23A;RPS10;ITPR1                                                                                                                                                                                                                                                                                                                                                                                                                                                                                  |
| GO:0050808            | BP        | synapse organization                                                 | 4.83E-09                                  | 84                          | 302                   | APBB1;NLGN1;IQSEC3;ADAM10;ARHGAP39;ITGA3;SEMA3F;SHANK2;SHANK3;PTPRF;LRFN2;GRID1;WNT7A;RAPGEF4;PAK3;NF1;PAFAH1B1;NCAN;MYO9A;DLGAP3;ARHGAP44;CTNNA2;SPTB;MYH10;NCKAP1;AGRN;SPARC;DAG1;CDH8;PTPRT;RIMS1;RIMS2;CTBP2;ACTN1;NEFH;MAGI2;GIT1;MPP2;DLG2;CTNND2;LAMB2;IGSF9B;LRFN4;LRR4;LRR4C;NRXN1;NRG1;CDH10;MDGA1;PLXND1;ADD2;PFFIA3;PFFIA4;EPHB2;NRG2;CTNNB1;IL1RAPL2;NTRK3;NLGN2;NUMB;LZTS1;LZTS3;NUMBL;CRK;GAP43;ABL1;NPTX1;C1QL2;NRXN3;SIPA1L1;PLXNC1;ITGB1;BCAN;ROCK2;CNTNAP1;PLXNA4;TENM2;TENM3;TENM4;ITGB3;ARHGEF7;ADGRB1;NOS1AP;EZR                                                                                                                                                                                                                                                                                                                                                                                                                                                                                                                                                                                                                                                                                                                                                                                                                                                                          |
| GO:0099572            | CC        | postsynaptic specialization                                          | 3.92E-06                                  | 74                          | 311                   | DLGAP3;DLGAP4;PICK1;NOS1;HTR5A;CHRNA1;CHRN1;KCN2D;CDH10;NLGN2;NLGN1;PRKCZ;HOMER2;DRP2;PAK3;SHANK2;SHANK3;MAGI2;ANKS1B;CTNND2;RPL5;ADGRA1;PLEKHA5;RPL30;TSC1;RPS25;HNRNP1;RPL6;ARHGAP44;CAP2B;RAPGEF4;ABL1;NUMB;LZTS3;GRK2;DAPK1;AGAP3;CTNNA2;CTNNB1;PLPPR4;GRIK5;GRIA2;GRIN2B;GRID1;CNH2;LRFN2;LRFN4;LRR4C;LRR4C;PTPRF;PTPRT;GRIA4;DRD3;CHRM1;SORCS3;CACNG7;NRG1;KCNAB2                                                                                                                                                                                                                                                                                                                                                                                                                                                                                                                                                                                                                                                                                                                                                                                                                                                                                                                                                                                                                                         |
| GO:0014069            | CC        | postsynaptic density                                                 | 8.95E-06                                  | 62                          | 251                   | PRKCZ;HOMER2;DRP2;PAK3;SHANK2;SHANK3;MAGI2;ANKS1B;CTNND2;RPL5;ADGRA1;PLEKHA5;RPL30;TSC1;RPS25;HNRNP1;RPL6;ARHGAP44;CAP2B;RAPGEF4;ABL1;NUMB;LZTS3;GRK2;DAPK1;AGAP3;CTNNA2;CTNNB1;IQSEC1;ARHGFE2;TNIK;NOS1;TANC2;CTNND1;SH3GL1;SH3GL3;DLG2;MPP2;LZTS1;ATP2B2;GRM1;ADCY1;GRIA1;PLPPR4;GRIK5;GRIA2;GRIN2B;GRID1;CNH2;LRFN2;LRFN4;LRR4C;LRR4C;PTPRF;PTPRT;GRIA4;DRD3;CHRM1;SORCS3;CACNG7;NRG1;KCNAB2                                                                                                                                                                                                                                                                                                                                                                                                                                                                                                                                                                                                                                                                                                                                                                                                                                                                                                                                                                                                                 |
| GO:0048786            | CC        | presynaptic active zone                                              | 1.42E-05                                  | 31                          | 89                    | FLOT1;C1QBP;UNC13A;CNTNAP1;ARHGAP44;PFFIA3;CACNA1B;RIMS1;CTBP2;RIMS2;CTNNA2;CTNNB1;CTNND1;APBA1;ATP2B2;ATP2B4;CANX;GRM7;GRIA2;GRIA1;GRIA4;GRIN2B;LPAR2;KCNA1;KCNJ8;GRM4;CACNA1D;CDH10;NRXN1;NRG1;ITGA3                                                                                                                                                                                                                                                                                                                                                                                                                                                                                                                                                                                                                                                                                                                                                                                                                                                                                                                                                                                                                                                                                                                                                                                                          |
| GO:0045211            | CC        | postsynaptic membrane                                                | 2.85E-05                                  | 35                          | 114                   | CTNNB1;HIP1;CNTN2;MAGI2;TENM2;CTNNA2;FBXO2;ATP2B2;KCNCA4;EPHB2;CANX;CACNA1C;SLC6A1;SLC6A11;SLC1A6;SLC6A3;CHRM1;CDH2;GRIA1;GRIA2;GRIK5;GRM1;GABBR2;ADGRB1;NTRK3;DAGLA;ITGB1;KCN2D;GABRD;KCN2D;ITGA3;ITGA5;ITGB4;LPAR1;GRID1                                                                                                                                                                                                                                                                                                                                                                                                                                                                                                                                                                                                                                                                                                                                                                                                                                                                                                                                                                                                                                                                                                                                                                                      |
| SYNGO:postsynp rocess | BP        | process in the postsynapse                                           | 3.20E-05                                  | 56                          | 218                   | SYNPO;MYO5A;ATP2B2;CALB1;ITPR1;GRM1;CHRM1;NOS1;GRIN2B;CHRNA1;CHRN1;GRIA1;GRIA2;GABRD;GRIA4;GRIK5;KCNCA4;KCN2D;BEGAIN;NPTX1;CNH2;NRXN3;CTNND1;CLPTM1;CTNND2;AGAP3;STX12;SNX27;GIT1;DLG2;CACNG7;C1QL2;ERBB2;PRKCZ;DAG1;MAGI2;TNIK;ADAM10;RAP1A;PAK3;RAPGEF4;SACM1L1;ITGB3;ITGB1;SH3GL2;IQSEC1;DRD3;NRG1;PICK1;NUMB;HIP1;LPAR1;ARRB2;NF1;ANKS1B;HTT                                                                                                                                                                                                                                                                                                                                                                                                                                                                                                                                                                                                                                                                                                                                                                                                                                                                                                                                                                                                                                                                |
| GO:0098793            | CC        | presynapse                                                           | 2.37E-04                                  | 99                          | 531                   | FBXO45;RAB8B;CACNB4;DPYSL2;CACNB1;CADPS2;CPEB2;APBB1;SEPTIN3;FLOT1;STXBP5;TNIK;HIP1;YWHAG;ADD2;NOS1AP;SH3GL1;ARFGEF2;GRK2;GAD1;GAD2;NECAP1;LRFN2;GAP43;PFFIA4;PRKCB;CTBP2;NSF;HTT;ANKS1B;CALB1;GDI1;C1QBP;UNC13A;CNTNAP1;ARHGAP44;PFFIA3;CACNA1B;RIMS1;RIMS2;CTNNA2;CTNNB1;CTNND1;APBA1;ATP2B2;ATP2B4;CANX;GRM7;GRIA2;GRIA1;GRIA4;GRIN2B;LPAR2;KCNA1;KCNJ8;GRM4;CACNA1D;CDH10;NRXN1;NRG1;ITGA3;WDR7;PICK1;RAB3A;RAB11B;RAB4A;DOCA2;ATP6V1B1;SLC6A2;ATP8A1;STX12;ATP6VD1;CALCLR;KCNC4;CADM3;EPHB2;ADCY8;SCN2A;SLC6A1;SLC1A6;CACNA1C;SLC6A3;ADGRL1;GRIK5;SCN1A;CDH2;GABBR2;CHRM1;LPAR1;ERBB2;NGFR;RPL13A;RPL23A;RPL5;RPL6;RPS10;ITPR3;ITPR1                                                                                                                                                                                                                                                                                                                                                                                                                                                                                                                                                                                                                                                                                                                                                                       |
| GO:0099055            | CC        | integral component of postsynaptic membrane                          | 4.37E-04                                  | 28                          | 97                    | ATP2B2;KCNCA4;EPHB2;CANX;CACNA1C;SLC6A1;SLC6A11;SLC1A6;SLC6A3;CHRM1;CDH2;GRIA1;GRIA2;GRIK5;GRM1;GABBR2;ADGRB1;NTRK3;DAGLA;ITGB1;KCN2D;GABRD;KCN2D;ITGA3;ITGA5;ITGB4;LPAR1;GRID1                                                                                                                                                                                                                                                                                                                                                                                                                                                                                                                                                                                                                                                                                                                                                                                                                                                                                                                                                                                                                                                                                                                                                                                                                                 |
| GO:0099059            | CC        | integral component of presynaptic active zone membrane               | 6.84E-04                                  | 17                          | 45                    | ATP2B2;ATP2B4;CANX;GRM7;GRIA2;GRIA1;GRIA4;GRIN2B;LPAR2;KCNA1;KCNJ8;GRM4;CACNA1D;CDH10;NRXN1;NRG1;ITGA3                                                                                                                                                                                                                                                                                                                                                                                                                                                                                                                                                                                                                                                                                                                                                                                                                                                                                                                                                                                                                                                                                                                                                                                                                                                                                                          |
| GO:0048787            | CC        | presynaptic active zone membrane                                     | 9.89E-04                                  | 19                          | 57                    | APBA1;RIMS1;ATP2B2;ATP2B4;CANX;GRM7;GRIA2;GRIA1;GRIA4;GRIN2B;LPAR2;KCNA1;KCNJ8;GRM4;CACNA1D;CDH10;NRXN1;NRG1;ITGA3                                                                                                                                                                                                                                                                                                                                                                                                                                                                                                                                                                                                                                                                                                                                                                                                                                                                                                                                                                                                                                                                                                                                                                                                                                                                                              |
| GO:0099061            | CC        | integral component of postsynaptic density membrane                  | 1.76E-03                                  | 23                          | 82                    | ATP2B2;GRM1;ADCY1;GRIA1;PLPPR4;GRIK5;GRIA2;GRIN2B;GRID1;CNH2;LRFN2;LRFN4;LRR4C;LRR4C;PTPRF;PTPRT;GRIA4;DRD3;CHRM1;SORCS3;CACNG7;NRG1;KCNAB2                                                                                                                                                                                                                                                                                                                                                                                                                                                                                                                                                                                                                                                                                                                                                                                                                                                                                                                                                                                                                                                                                                                                                                                                                                                                     |
| GO:0098839            | CC        | postsynaptic density membrane                                        | 2.20E-03                                  | 26                          | 101                   | DLG2;MPP2;LZTS1;ATP2B2;GRM1;ADCY1;GRIA1;PLPPR4;GRIK5;GRIA2;GRIN2B;GRID1;CNH2;LRFN2;LRFN4;LRR4C;LRR4C;PTPRF;PTPRT;GRIA4;DRD3;CHRM1;SORCS3;CACNG7;NRG1;KCNAB2                                                                                                                                                                                                                                                                                                                                                                                                                                                                                                                                                                                                                                                                                                                                                                                                                                                                                                                                                                                                                                                                                                                                                                                                                                                     |
| GO:0099072            | BP        | regulation of postsynaptic membrane neurotransmitter receptor levels | 2.67E-03                                  | 32                          | 121                   | NRXN3;CTNND1;CLPTM1;CTNND2;AGAP3;STX12;SNX27;GIT1;NPTX1;DLG2;CACNG7;C1QL2;ERBB2;PRKCZ;DAG1;MAGI2;TNIK;ADAM10;RAP1A;PAK3;RAPGEF4;SACM1L1;ITGB3;ITGB1;SH3GL2;IQSEC1;DRD3;NRG1;PICK1;NUMB;HIP1;LPAR1                                                                                                                                                                                                                                                                                                                                                                                                                                                                                                                                                                                                                                                                                                                                                                                                                                                                                                                                                                                                                                                                                                                                                                                                               |
| GO:0007416            | BP        | synapse assembly                                                     | 3.65E-03                                  | 26                          | 92                    | ADD2;NRXN1;PFFIA3;PFFIA4;EPHB2;NRG2;CTNNB1;NRG1;IL1RAPL2;NTRK3;LRFN4;NLGN2;MDGA1;WNT7A;NUMB;LZTS1;LZTS3;NUMBL;NLGN1;CRK;GAP43;ABL1;NPTX1;C1QL2;NRXN3;SIPA1L1                                                                                                                                                                                                                                                                                                                                                                                                                                                                                                                                                                                                                                                                                                                                                                                                                                                                                                                                                                                                                                                                                                                                                                                                                                                    |
| GO:0042734            | CC        | presynaptic membrane                                                 | 6.80E-03                                  | 30                          | 136                   | CTNNB1;ATP2B2;STXBP5;CTNNA2;KCNCA4;CADM3;EPHB2;ADCY8;CACNA1B;SCN2A;SLC6A1;SLC6A11;SLC1A6;CACNA1C;SLC6A3;SLC6A2;NRXN1;ADGR1;GRIK5;GRIA1;GRIA2;SCN1A;GRIN2B;GRM7;CDH2;GABBR2;CHRM1;LPAR1;ERBB2;NGFR                                                                                                                                                                                                                                                                                                                                                                                                                                                                                                                                                                                                                                                                                                                                                                                                                                                                                                                                                                                                                                                                                                                                                                                                               |

The table shows all SynGO ontology terms enriched in our list of 2,156 genes harbouring pdsNVs in cases as compared to the "brain expressed" background set (18,035 unique genes including 1,225 SynGO annotated genes). 254/2156 genes from our gene list were mapped to 254 unique SynGO annotated genes. 13 Cellular Component (CC) and 5 Biological Processes (BP) terms are significantly enriched at 1% FDR.

## b) novel pdSNVs

| GO term ID           | GO domain | GO term name                                                                                                               | GSEA 'gene cluster' FDR corrected p-value | GSEA count foreground/input | GSEA count background | Genes                                                                                                                                                                                                                                                                                                                                                                                                                                                                                                                                                                                     |
|----------------------|-----------|----------------------------------------------------------------------------------------------------------------------------|-------------------------------------------|-----------------------------|-----------------------|-------------------------------------------------------------------------------------------------------------------------------------------------------------------------------------------------------------------------------------------------------------------------------------------------------------------------------------------------------------------------------------------------------------------------------------------------------------------------------------------------------------------------------------------------------------------------------------------|
| GO:0050808           | BP        | synapse organization                                                                                                       | 2.18E-07                                  | 41                          | 302                   | ADAM10;SHANK2;SHANK3;WNT7A;RAPGEF4;PAK3;NF1;PAFAH1B1;NCAN;CTNNA2;SPTB;MYH10;RIMS1;RIMS2;NEFH;MAGI2;GIT1;LRFN4;LRRCA4;NRXN1;NRG1;PLXND1;ADD2;PPFIA4;CTNNB1;NLGN2;CRK;GAP43;C1QL2;NRXN3;SIPA11;PLXNC1;ITGB1;BCAN;CNTNAP1;PLXNA4;TENM4;ARHGFE7;NOS1AP;EZR                                                                                                                                                                                                                                                                                                                                    |
| GO:0045202           | CC        | synapse                                                                                                                    | 1.85E-06                                  | 90                          | 1082                  | FLOT1;SLC18A1;PABPC1;RPS25;SLC6A11;NCAN;PPFIA3;PPFIA4;ARHGDA1;SLC3A2;DPYSL3;MADD;RPL30;SYT3;ITGB1;CACNB1;SEPTIN3;ADD2;NOS1AP;ARFGEF2;GAD1;GAD2;GAP43;PRKCB;GDI1;UNC13A;CNTNAP1;RIMS1;RIMS2;CTNNA2;CTNNB1;ATP2B2;ATP2B4;CANX;GRM7;CACNA1D;NRXN1;NRG1;PICK1;RAB11B;ATP6VDD1;CALCLRL;SCN2A;SLC1A6;ADGRL1;GRIK5;SCN1A;CDH2;ITPR1;C1QL2;ADAM10;BEGAIN;APC2;GIT1;SIPA11;CNN3;SPTB;SPTAN1;AGAP2;MYO5A;PLCB1;NEFH;MYH10;SYNPO;NOS1;KCN2D;NLGN2;PAK3;SHANK2;SHANK3;MAGI2;ADGRA1;TSC1;HNRNP1;RAPGEF4;TANC2;SH3GL3;GRM1;PLPPR4;LRFN4;LRRCA4;DRD3;KCNAB2;RAB11FIP3;CNTN2;FBXO2;GABRD;KCNN2;ITGA5;BCAN |
| SYNGO: synprocess    | BP        | process in the synapse                                                                                                     | 4.78E-06                                  | 76                          | 874                   | CACNA1D;GRIK5;SCN2A;SCN1A;NRXN1;ARHGDA1;RAPGEF4;CTNNB1;UNC13A;PPFIA3;RIMS1;RIMS2;PRKCB;GIT1;WNT7A;ATP6VDD1;CANX;SLC6A11;SLC1A6;FLOT1;DRD3;SYNPO;MYO5A;ATP2B2;ITPR1;GRM1;NOS1;GABRD;KCN2D;BEGAIN;NRXN3;C1QL2;MAGI2;ADAM10;RAP1A;PAK3;SACM1L1;ITGB1;NRG1;PICK1;ARRB2;NF1;PLCB1;TENM4;CDH2;LRRCA4;NCAN;SHANK3;KCNN2;PAFAH1B1;GRM7;NEFH;SHANK2;CTNNA2;SPTB;MYH10;LRFN4;PLXND1;ADD2;PPFIA4;NLGN2;CRK;GAP43;SIPA11;PLXNC1;BCAN;CNTNAP1;PLXNA4;ARHGFE7;NOS1AP;EZR;FBXO2;GAD1;GAD2;SFPQ;MADD                                                                                                      |
| GO:0098794           | CC        | postsynapse                                                                                                                | 1.52E-05                                  | 57                          | 621                   | ADAM10;BEGAIN;APC2;GIT1;SIPA11;CACNB1;ADD2;NOS1AP;ARFGEF2;CNN3;SPTB;SPTAN1;AGAP2;MYO5A;NRG1;PLCB1;NEFH;MYH10;SYNPO;PICK1;NOS1;KCN2D;NLGN2;PAK3;SHANK2;SHANK3;MAGI2;ADGRA1;RPL30;TSC1;RPS25;HNRNP1;RAPGEF4;CTNNA2;CTNNB1;TANC2;SH3GL3;ATP2B2;GRM1;PLPPR4;GRIK5;LRFN4;LRRCA4;DRD3;KCNAB2;RAB11FIP3;CNTN2;FBXO2;CANX;SLC6A11;SLC1A6;CDH2;ITGB1;GABRD;KCNN2;ITGA5;ITPR1                                                                                                                                                                                                                       |
| GO:0048786           | CC        | presynaptic active zone                                                                                                    | 2.54E-04                                  | 15                          | 89                    | FLOT1;UNC13A;CNTNAP1;PPFIA3;RIMS1;RIMS2;CTNNA2;CTNNB1;ATP2B2;ATP2B4;CANX;GRM7;CACNA1D;NRXN1;NRG1                                                                                                                                                                                                                                                                                                                                                                                                                                                                                          |
| GO:0045211           | CC        | postsynaptic membrane                                                                                                      | 2.54E-04                                  | 17                          | 114                   | CTNNB1;CNTN2;MAGI2;CTNNA2;FBXO2;ATP2B2;CANX;SLC6A11;SLC1A6;CDH2;GRIK5;GRM1;ITGB1;KCN2D;GABRD;KCNN2;ITGA5                                                                                                                                                                                                                                                                                                                                                                                                                                                                                  |
| SYNGO:postsynprocess | BP        | process in the postsynapse                                                                                                 | 9.34E-04                                  | 25                          | 218                   | SYNPO;MYO5A;ATP2B2;ITPR1;GRM1;NOS1;GABRD;GRIK5;KCN2D;BEGAIN;NRXN3;GIT1;C1QL2;MAGI2;ADAM10;RAP1A;PAK3;RAPGEF4;SACM1L1;ITGB1;DRD3;NRG1;PICK1;ARRB2;NF1                                                                                                                                                                                                                                                                                                                                                                                                                                      |
| GO:0007416           | BP        | synapse assembly                                                                                                           | 2.22E-03                                  | 14                          | 92                    | ADD2;NRXN1;PPFIA3;PPFIA4;CTNNB1;NRG1;LRFN4;NLGN2;WNT7A;CRK;GAP43;C1QL2;NRXN3;SIPA11                                                                                                                                                                                                                                                                                                                                                                                                                                                                                                       |
| GO:0098698           | BP        | postsynaptic specialization assembly                                                                                       | 2.43E-03                                  | 8                           | 32                    | NLGN2;CRK;GAP43;NRXN1;C1QL2;NRXN3;SIPA11;LRFN4                                                                                                                                                                                                                                                                                                                                                                                                                                                                                                                                            |
| GO:0014069           | CC        | postsynaptic density                                                                                                       | 3.69E-03                                  | 24                          | 251                   | PAK3;SHANK2;SHANK3;MAGI2;ADGRA1;RPL30;TSC1;RPS25;HNRNP1;RAPGEF4;CTNNA2;CTNNB1;NOS1;TANC2;SH3GL3;ATP2B2;GRM1;PLPPR4;GRIK5;LRFN4;LRRCA4;DRD3;NRG1;KCNAB2                                                                                                                                                                                                                                                                                                                                                                                                                                    |
| GO:0099566           | BP        | regulation of postsynaptic cytosolic calcium levels                                                                        | 4.47E-03                                  | 5                           | 12                    | SYNPO;MYO5A;ATP2B2;ITPR1;GRM1                                                                                                                                                                                                                                                                                                                                                                                                                                                                                                                                                             |
| GO:0099572           | CC        | postsynaptic specialization                                                                                                | 5.74E-03                                  | 27                          | 311                   | PICK1;NOS1;KCN2D;NLGN2;PAK3;SHANK2;SHANK3;MAGI2;ADGRA1;RPL30;TSC1;RPS25;HNRNP1;RAPGEF4;CTNNA2;CTNNB1;TANC2;SH3GL3;ATP2B2;GRM1;PLPPR4;GRIK5;LRFN4;LRRCA4;DRD3;NRG1;KCNAB2                                                                                                                                                                                                                                                                                                                                                                                                                  |
| GO:0099055           | CC        | integral component of postsynaptic membrane neurotransmitter receptor localization to postsynaptic specialization membrane | 7.32E-03                                  | 12                          | 97                    | ATP2B2;CANX;SLC6A11;SLC1A6;CDH2;GRIK5;GRM1;ITGB1;KCN2D;GABRD;KCNN2;ITGA5                                                                                                                                                                                                                                                                                                                                                                                                                                                                                                                  |
| GO:0099645           | BP        | regulation of postsynapse organization                                                                                     | 8.42E-03                                  | 8                           | 44                    | GIT1;C1QL2;NRXN3;MAGI2;ADAM10;RAP1A;PAK3;RAPGEF4                                                                                                                                                                                                                                                                                                                                                                                                                                                                                                                                          |
| GO:0099175           | BP        | structural constituent of synapse                                                                                          | 8.42E-03                                  | 7                           | 34                    | RIMS1;RIMS2;NEFH;MAGI2;GIT1;SHANK3;SHANK2                                                                                                                                                                                                                                                                                                                                                                                                                                                                                                                                                 |
| GO:0099188           | BP        | postsynaptic cytoskeleton organization                                                                                     | 8.42E-03                                  | 6                           | 25                    | SIPA11;ARHGFE7;NOS1AP;MYH10;EZR;TENM4                                                                                                                                                                                                                                                                                                                                                                                                                                                                                                                                                     |

The table shows all SynGO ontology terms enriched in our list of 823 genes harbouring novel pdSNVs in cases as compared to the "brain expressed" background set (18,035 unique genes including 1,225 SynGO annotated genes). 105/823 genes from our gene list were mapped to 105 unique SynGO annotated genes. 7 Cellular Component (CC) and 10 Biological Processes (BP) terms are significantly enriched at 1% FDR.

## c) novel pdSNVs not shared with unaffected siblings

| GO term ID           | GO domain | GO term name                                                                   | GSEA 'gene cluster' FDR corrected p-value | GSEA count foreground/input | GSEA count background | Genes                                                                                                                                                                                                                                                                                                                                                                                                                                                                            |
|----------------------|-----------|--------------------------------------------------------------------------------|-------------------------------------------|-----------------------------|-----------------------|----------------------------------------------------------------------------------------------------------------------------------------------------------------------------------------------------------------------------------------------------------------------------------------------------------------------------------------------------------------------------------------------------------------------------------------------------------------------------------|
| GO:0050808           | BP        | synapse organization                                                           | 7.55E-07                                  | 34                          | 302                   | ADAM10;SHANK2;SHANK3;WNT7A;RAPGEF4;NF1;PAFAH1B1;NCAN;SPTB;RIMS1;RIMS2;NEFH;MAGI2;GIT1;LRRCA4;NRXN1;NRG1;PLXND1;ADD2;PPFIA4;CTNNB1;NLGN2;CRK;GAP43;C1QL2;NRXN3;SIPA11;ITGB1;BCAN;PLXNA4;TENM4;ARHGFE7;NOS1AP;EZR                                                                                                                                                                                                                                                                  |
| SYNGO: synprocess    | BP        | process in the synapse                                                         | 1.19E-06                                  | 65                          | 874                   | CACNA1D;GRIK5;SCN2A;SCN1A;NRXN1;ARHGDA1;RAPGEF4;CTNNB1;UNC13A;RIMS1;RIMS2;PRKCB;GIT1;WNT7A;CANX;SLC6A11;SLC1A6;FLOT1;SYNPO;MYO5A;ATP2B2;ITPR1;GABRD;KCN2D;BEGAIN;NRXN3;C1QL2;MAGI2;ADAM10;RAP1A;SACM1L1;ITGB1;NRG1;PICK1;ARRB2;NF1;PLCB1;TENM4;CDH2;LRRCA4;NCAN;SHANK3;KCNN2;PAFAH1B1;GRM7;NEFH;SHANK2;SPTB;PLXND1;ADD2;PPFIA4;NLGN2;CRK;GAP43;SIPA11;BCAN;PLXNA4;ARHGFE7;NOS1AP;EZR;FBXO2;GAD1;GAD2;SFPQ;MADD                                                                   |
| GO:0045202           | CC        | synapse                                                                        | 2.89E-06                                  | 74                          | 1082                  | FLOT1;SLC18A1;PABPC1;RPS25;SLC6A11;NCAN;PPFIA4;ARHGDA1;SLC3A2;DPYSL3;MADD;SYT3;ITGB1;CACNB1;SEPTIN3;ADD2;NOS1AP;ARFGEF2;GAD1;GAD2;GAP43;PRKCB;GDI1;UNC13A;RIMS1;RIMS2;CTNNB1;ATP2B2;ATP2B4;CANX;GRM7;CACNA1D;NRXN1;NRG1;PICK1;RAB11B;CALCLRL;SCN2A;SLC1A6;GRIK5;SCN1A;CDH2;ITPR1;C1QL2;ADAM10;BEGAIN;APC2;GIT1;SIPA11;SPTB;SPTAN1;AGAP2;MYO5A;PLCB1;NEFH;SYNPO;KCN2D;NLGN2;SHANK2;SHANK3;MAGI2;ADGRA1;TSC1;RAPGEF4;TANC2;SH3GL3;PLPPR4;LRRCA4;CNTN2;FBXO2;GABRD;KCNN2;ITGA5;BCAN |
| GO:0098794           | CC        | postsynapse                                                                    | 1.09E-04                                  | 45                          | 621                   | ADAM10;BEGAIN;APC2;GIT1;SIPA11;CACNB1;ADD2;NOS1AP;ARFGEF2;SPTB;SPTAN1;AGAP2;MYO5A;NRG1;PLCB1;NEFH;SYNPO;PICK1;KCN2D;NLGN2;SHANK2;SHANK3;MAGI2;ADGRA1;TSC1;RPS25;RAPGEF4;CTNNB1;TANC2;SH3GL3;ATP2B2;PLPPR4;GRIK5;LRRCA4;CNTN2;FBXO2;CANX;SLC6A11;SLC1A6;CDH2;ITGB1;GABRD;KCNN2;ITGA5;ITPR1                                                                                                                                                                                        |
| GO:0045211           | CC        | postsynaptic membrane                                                          | 1.97E-04                                  | 15                          | 114                   | CTNNB1;CNTN2;MAGI2;FBXO2;ATP2B2;CANX;SLC6A11;SLC1A6;CDH2;GRIK5;ITGB1;KCN2D;GABRD;KCNN2;ITGA5                                                                                                                                                                                                                                                                                                                                                                                     |
| GO:0048786           | CC        | presynaptic active zone                                                        | 7.01E-04                                  | 12                          | 89                    | FLOT1;UNC13A;RIMS1;RIMS2;CTNNB1;ATP2B2;ATP2B4;CANX;GRM7;CACNA1D;NRXN1;NRG1                                                                                                                                                                                                                                                                                                                                                                                                       |
| SYNGO:postsynprocess | BP        | process in the postsynapse                                                     | 1.01E-03                                  | 21                          | 218                   | SYNPO;MYO5A;ATP2B2;ITPR1;GABRD;GRIK5;KCN2D;BEGAIN;NRXN3;GIT1;C1QL2;MAGI2;ADAM10;RAP1A;RAPGEF4;SACM1L1;ITGB1;NRG1;PICK1;ARRB2;NF1                                                                                                                                                                                                                                                                                                                                                 |
| GO:0007416           | BP        | synapse assembly                                                               | 2.10E-03                                  | 12                          | 92                    | ADD2;NRXN1;PPFIA4;CTNNB1;NRG1;NLGN2;WNT7A;CRK;GAP43;C1QL2;NRXN3;SIPA11                                                                                                                                                                                                                                                                                                                                                                                                           |
| GO:0098698           | BP        | postsynaptic specialization assembly                                           | 2.26E-03                                  | 7                           | 32                    | NLGN2;CRK;GAP43;NRXN1;C1QL2;NRXN3;SIPA11                                                                                                                                                                                                                                                                                                                                                                                                                                         |
| GO:0098918           | BP        | structural constituent of synapse                                              | 2.59E-03                                  | 7                           | 34                    | RIMS1;RIMS2;NEFH;MAGI2;GIT1;SHANK3;SHANK2                                                                                                                                                                                                                                                                                                                                                                                                                                        |
| GO:0099055           | CC        | integral component of postsynaptic membrane                                    | 3.81E-03                                  | 11                          | 97                    | ATP2B2;CANX;SLC6A11;SLC1A6;CDH2;GRIK5;ITGB1;KCN2D;GABRD;KCNN2;ITGA5                                                                                                                                                                                                                                                                                                                                                                                                              |
| GO:0048787           | CC        | presynaptic active zone membrane                                               | 4.21E-03                                  | 8                           | 57                    | RIMS1;ATP2B2;ATP2B4;CANX;GRM7;CACNA1D;NRXN1;NRG1                                                                                                                                                                                                                                                                                                                                                                                                                                 |
| GO:0099059           | CC        | integral component of presynaptic active zone membrane                         | 4.21E-03                                  | 7                           | 45                    | ATP2B2;ATP2B4;CANX;GRM7;CACNA1D;NRXN1;NRG1                                                                                                                                                                                                                                                                                                                                                                                                                                       |
| GO:0098793           | CC        | presynapse                                                                     | 4.36E-03                                  | 33                          | 531                   | CACNB1;SEPTIN3;FLOT1;ADD2;NOS1AP;ARFGEF2;GAD1;GAD2;GAP43;PPFIA4;PRKCB;GDI1;UNC13A;RIMS1;RIMS2;CTNNB1;ATP2B2;ATP2B4;CANX;GRM7;CACNA1D;NRXN1;NRG1;PICK1;RAB11B;CALCLRL;SCN2A;SLC6A11;SLC1A6;GRIK5;SCN1A;CDH2;ITPR1                                                                                                                                                                                                                                                                 |
| GO:0099175           | BP        | regulation of postsynapse organization                                         | 6.14E-03                                  | 8                           | 54                    | SHANK2;SHANK3;WNT7A;RAPGEF4;ADAM10;NF1;PAFAH1B1;NCAN                                                                                                                                                                                                                                                                                                                                                                                                                             |
| GO:0099566           | BP        | regulation of postsynaptic cytosolic calcium levels                            | 6.95E-03                                  | 4                           | 12                    | SYNPO;MYO5A;ATP2B2;ITPR1                                                                                                                                                                                                                                                                                                                                                                                                                                                         |
| GO:0099645           | BP        | neurotransmitter receptor localization to postsynaptic specialization membrane | 6.95E-03                                  | 7                           | 44                    | GIT1;C1QL2;NRXN3;MAGI2;ADAM10;RAP1A;RAPGEF4                                                                                                                                                                                                                                                                                                                                                                                                                                      |
| GO:0099186           | BP        | structural constituent of postsynapse                                          | 9.81E-03                                  | 5                           | 24                    | NEFH;MAGI2;GIT1;SHANK3;SHANK2                                                                                                                                                                                                                                                                                                                                                                                                                                                    |

The table shows all SynGO ontology terms enriched in our list of 645 genes harbouring novel pdSNVs not shared with unaffected siblings in cases as compared to the "brain expressed" background set (18,035 unique genes including 1,225 SynGO annotated genes). 88/645 genes from our gene list were mapped to 88 unique SynGO annotated genes. 8 Cellular Component (CC) and 10 Biological Processes (BP) terms are significantly enriched at 1% FDR.

Supplementary Table 8: List of high-confidence ASD/NDD genes

| Gene      | Fu et al, 2022        |                       |                        |                       | Trost et al, 2022    | This study       |                                   |                                               |                                       |                                                | Leblond et al, 2021        |
|-----------|-----------------------|-----------------------|------------------------|-----------------------|----------------------|------------------|-----------------------------------|-----------------------------------------------|---------------------------------------|------------------------------------------------|----------------------------|
|           | ASD72<br>(FDR ≤0.001) | ASD185<br>(FDR ≤0.05) | NDD373<br>(FDR ≤0.001) | NDD664<br>(FDR ≤0.05) | ASD135<br>(FDR <0.1) | Gene<br>category | Nr of rare pdSNVs<br>in 144 cases | Nr of rare pdSNVs<br>in 55 unaffected<br>sibs | Nr of novel<br>pdSNVs in 144<br>cases | Nr of novel<br>pdSNVs in 55<br>unaffected sibs | GeneTrek<br>classification |
| ANK2      | TRUE                  | TRUE                  | TRUE                   | TRUE                  | TRUE                 | ASD              | 0                                 | 1                                             | 0                                     | 1                                              | HC-NDD                     |
| ANKRD11   | TRUE                  | TRUE                  | TRUE                   | TRUE                  | TRUE                 | ASD              | 1                                 | 0                                             | 0                                     | 0                                              | HC-NDD                     |
| ARID1B    | TRUE                  | TRUE                  | TRUE                   | TRUE                  | TRUE                 | ASD              | 1                                 | 0                                             | 0                                     | 0                                              | HC-NDD                     |
| ASH1L     | TRUE                  | TRUE                  | TRUE                   | TRUE                  | TRUE                 | ASD              | 1                                 | 0                                             | 0                                     | 0                                              | HC-NDD                     |
| ATP2B2    | TRUE                  | TRUE                  | TRUE                   | TRUE                  | TRUE                 | ASD              | 5                                 | 1                                             | 4                                     | 0                                              | Candidate-NDD              |
| BRSK2     | TRUE                  | TRUE                  | TRUE                   | TRUE                  | TRUE                 | ASD              | 3                                 | 0                                             | 2                                     | 0                                              | HC-NDD                     |
| CHD2      | TRUE                  | TRUE                  | TRUE                   | TRUE                  | TRUE                 | ASD              | 2                                 | 0                                             | 0                                     | 0                                              | HC-NDD                     |
| CHD8      | TRUE                  | TRUE                  | TRUE                   | TRUE                  | TRUE                 | ASD              | 2                                 | 0                                             | 0                                     | 0                                              | HC-NDD                     |
| CTCF      | TRUE                  | TRUE                  | TRUE                   | TRUE                  | TRUE                 | ASD              | 2                                 | 2                                             | 2                                     | 2                                              | HC-NDD                     |
| CTNNB1    | TRUE                  | TRUE                  | TRUE                   | TRUE                  | TRUE                 | ASD              | 1                                 | 1                                             | 1                                     | 0                                              | HC-NDD                     |
| DYNC1H1   | TRUE                  | TRUE                  | TRUE                   | TRUE                  | TRUE                 | ASD              | 4                                 | 0                                             | 4                                     | 0                                              | HC-NDD                     |
| EBF3      | TRUE                  | TRUE                  | TRUE                   | TRUE                  | TRUE                 | ASD              | 1                                 | 0                                             | 0                                     | 0                                              | HC-NDD                     |
| EHMT1     | TRUE                  | TRUE                  | TRUE                   | TRUE                  | TRUE                 | ASD              | 1                                 | 2                                             | 0                                     | 0                                              | HC-NDD                     |
| GRIN2B    | TRUE                  | TRUE                  | TRUE                   | TRUE                  | TRUE                 | ASD              | 2                                 | 2                                             | 0                                     | 0                                              | HC-NDD                     |
| KCNQ3     | TRUE                  | TRUE                  | TRUE                   | TRUE                  | TRUE                 | ASD              | 1                                 | 0                                             | 0                                     | 0                                              | HC-NDD                     |
| KMT2A     | TRUE                  | TRUE                  | TRUE                   | TRUE                  | TRUE                 | ASD              | 1                                 | 2                                             | 0                                     | 0                                              | HC-NDD                     |
| NF1       | TRUE                  | TRUE                  | TRUE                   | TRUE                  | TRUE                 | ASD              | 1                                 | 0                                             | 1                                     | 0                                              | HC-NDD                     |
| RFX3      | TRUE                  | TRUE                  | TRUE                   | TRUE                  | TRUE                 | ASD              | 2                                 | 0                                             | 2                                     | 0                                              | HC-NDD                     |
| RORB      | TRUE                  | TRUE                  | TRUE                   | TRUE                  | TRUE                 | ASD              | 1                                 | 0                                             | 0                                     | 0                                              | HC-NDD                     |
| SCN2A     | TRUE                  | TRUE                  | TRUE                   | TRUE                  | TRUE                 | ASD              | 1                                 | 0                                             | 1                                     | 0                                              | HC-NDD                     |
| SHANK3    | TRUE                  | TRUE                  | TRUE                   | TRUE                  | TRUE                 | ASD              | 2                                 | 0                                             | 2                                     | 0                                              | HC-NDD                     |
| SLC6A1    | TRUE                  | TRUE                  | TRUE                   | TRUE                  | TRUE                 | ASD              | 1                                 | 1                                             | 0                                     | 0                                              | HC-NDD                     |
| SMARCC2   | TRUE                  | TRUE                  | TRUE                   | TRUE                  | TRUE                 | ASD              | 2                                 | 1                                             | 0                                     | 0                                              | HC-NDD                     |
| TCF7L2    | TRUE                  | TRUE                  | TRUE                   | TRUE                  | TRUE                 | ASD              | 0                                 | 1                                             | 0                                     | 0                                              | HC-NDD                     |
| WAC       | TRUE                  | TRUE                  | TRUE                   | TRUE                  | TRUE                 | ASD              | 0                                 | 1                                             | 0                                     | 0                                              | HC-NDD                     |
| CASKIN1   | TRUE                  | TRUE                  | TRUE                   | TRUE                  | FALSE                | ASD              | 0                                 | 1                                             | 0                                     | 0                                              | Candidate-NDD              |
| DSCAM     | TRUE                  | TRUE                  | TRUE                   | TRUE                  | FALSE                | ASD              | 2                                 | 0                                             | 1                                     | 0                                              | HC-NDD                     |
| KCNMA1    | TRUE                  | TRUE                  | TRUE                   | TRUE                  | FALSE                | ASD              | 1                                 | 1                                             | 0                                     | 0                                              | HC-NDD                     |
| KMT2C     | TRUE                  | TRUE                  | TRUE                   | TRUE                  | FALSE                | ASD              | 1                                 | 0                                             | 1                                     | 0                                              | HC-NDD                     |
| NIPBL     | TRUE                  | TRUE                  | TRUE                   | TRUE                  | FALSE                | ASD              | 1                                 | 0                                             | 0                                     | 0                                              | HC-NDD                     |
| NRXN1     | TRUE                  | TRUE                  | TRUE                   | TRUE                  | FALSE                | ASD              | 2                                 | 0                                             | 1                                     | 0                                              | HC-NDD                     |
| PLXNA1    | TRUE                  | TRUE                  | TRUE                   | TRUE                  | FALSE                | ASD              | 3                                 | 0                                             | 2                                     | 0                                              | HC-NDD                     |
| SCN1A     | TRUE                  | TRUE                  | TRUE                   | TRUE                  | FALSE                | ASD              | 2                                 | 0                                             | 1                                     | 0                                              | HC-NDD                     |
| ZBTB20    | TRUE                  | TRUE                  | TRUE                   | TRUE                  | FALSE                | ASD              | 1                                 | 0                                             | 0                                     | 0                                              | HC-NDD                     |
| APBB1     | FALSE                 | TRUE                  | FALSE                  | TRUE                  | TRUE                 | ASD              | 1                                 | 0                                             | 0                                     | 0                                              | Candidate-NDD              |
| CAPRN1    | FALSE                 | TRUE                  | TRUE                   | TRUE                  | TRUE                 | ASD              | 0                                 | 1                                             | 0                                     | 1                                              | HC-NDD                     |
| DPYSL2    | FALSE                 | TRUE                  | FALSE                  | TRUE                  | TRUE                 | ASD              | 1                                 | 0                                             | 0                                     | 0                                              | HC-NDD                     |
| GRIA2     | FALSE                 | TRUE                  | TRUE                   | TRUE                  | TRUE                 | ASD              | 1                                 | 0                                             | 0                                     | 0                                              | HC-NDD                     |
| SHANK2    | FALSE                 | TRUE                  | TRUE                   | TRUE                  | TRUE                 | ASD              | 1                                 | 0                                             | 1                                     | 0                                              | HC-NDD                     |
| TLE3      | FALSE                 | TRUE                  | TRUE                   | TRUE                  | TRUE                 | ASD              | 0                                 | 1                                             | 0                                     | 1                                              | Candidate-NDD              |
| TRIP12    | FALSE                 | TRUE                  | TRUE                   | TRUE                  | TRUE                 | ASD              | 0                                 | 1                                             | 0                                     | 0                                              | HC-NDD                     |
| TSC1      | FALSE                 | TRUE                  | TRUE                   | TRUE                  | TRUE                 | ASD              | 3                                 | 0                                             | 3                                     | 0                                              | HC-NDD                     |
| UBR1      | FALSE                 | TRUE                  | FALSE                  | TRUE                  | TRUE                 | ASD              | 0                                 | 1                                             | 0                                     | 0                                              | HC-NDD                     |
| ZMYND11   | FALSE                 | TRUE                  | TRUE                   | TRUE                  | TRUE                 | ASD              | 1                                 | 0                                             | 0                                     | 0                                              | HC-NDD                     |
| ZMYND8    | FALSE                 | TRUE                  | TRUE                   | TRUE                  | TRUE                 | ASD              | 1                                 | 0                                             | 0                                     | 0                                              | HC-NDD                     |
| ACVR2A    | FALSE                 | TRUE                  | TRUE                   | TRUE                  | FALSE                | ASD              | 1                                 | 0                                             | 1                                     | 0                                              | Candidate-NDD              |
| AGO4      | FALSE                 | TRUE                  | FALSE                  | TRUE                  | FALSE                | ASD              | 2                                 | 0                                             | 2                                     | 0                                              | Candidate-NDD              |
| AHDC1     | FALSE                 | TRUE                  | TRUE                   | TRUE                  | FALSE                | ASD              | 5                                 | 0                                             | 0                                     | 0                                              | HC-NDD                     |
| ANKH      | FALSE                 | TRUE                  | FALSE                  | TRUE                  | FALSE                | ASD              | 1                                 | 0                                             | 0                                     | 0                                              | HC-NDD                     |
| ATP4A     | FALSE                 | TRUE                  | FALSE                  | TRUE                  | FALSE                | ASD              | 0                                 | 2                                             | 0                                     | 0                                              |                            |
| BTG3      | FALSE                 | TRUE                  | FALSE                  | TRUE                  | FALSE                | ASD              | 0                                 | 1                                             | 0                                     | 0                                              | Candidate-NDD              |
| CACNA1D   | FALSE                 | TRUE                  | FALSE                  | TRUE                  | FALSE                | ASD              | 1                                 | 0                                             | 1                                     | 0                                              | HC-NDD                     |
| CDK13     | FALSE                 | TRUE                  | TRUE                   | TRUE                  | FALSE                | ASD              | 1                                 | 0                                             | 1                                     | 0                                              | HC-NDD                     |
| CELF1     | FALSE                 | TRUE                  | FALSE                  | TRUE                  | FALSE                | ASD              | 1                                 | 1                                             | 0                                     | 0                                              | Candidate-NDD              |
| CHD3      | FALSE                 | TRUE                  | TRUE                   | TRUE                  | FALSE                | ASD              | 2                                 | 2                                             | 1                                     | 1                                              | HC-NDD                     |
| CTNNA2    | FALSE                 | TRUE                  | TRUE                   | TRUE                  | FALSE                | ASD              | 1                                 | 1                                             | 1                                     | 1                                              | HC-NDD                     |
| CYFIP2    | FALSE                 | TRUE                  | FALSE                  | TRUE                  | FALSE                | ASD              | 1                                 | 0                                             | 0                                     | 0                                              | HC-NDD                     |
| DIP2A     | FALSE                 | TRUE                  | FALSE                  | TRUE                  | FALSE                | ASD              | 2                                 | 2                                             | 1                                     | 1                                              | HC-NDD                     |
| DIP2C     | FALSE                 | TRUE                  | FALSE                  | TRUE                  | FALSE                | ASD              | 0                                 | 1                                             | 0                                     | 1                                              | Candidate-NDD              |
| GABBR2    | FALSE                 | TRUE                  | TRUE                   | TRUE                  | FALSE                | ASD              | 1                                 | 0                                             | 0                                     | 0                                              | HC-NDD                     |
| HDAC4     | FALSE                 | TRUE                  | TRUE                   | TRUE                  | FALSE                | ASD              | 1                                 | 0                                             | 0                                     | 0                                              | HC-NDD                     |
| HECTD4    | FALSE                 | TRUE                  | TRUE                   | TRUE                  | FALSE                | ASD              | 2                                 | 1                                             | 1                                     | 0                                              | HC-NDD                     |
| INTS3     | FALSE                 | TRUE                  | FALSE                  | TRUE                  | FALSE                | ASD              | 3                                 | 2                                             | 1                                     | 1                                              | Candidate-NDD              |
| ITPR3     | FALSE                 | TRUE                  | FALSE                  | TRUE                  | FALSE                | ASD              | 2                                 | 1                                             | 0                                     | 1                                              | Candidate-NDD              |
| KIF1B     | FALSE                 | TRUE                  | FALSE                  | TRUE                  | FALSE                | ASD              | 1                                 | 1                                             | 1                                     | 1                                              | Candidate-NDD              |
| MAPK8IP3  | FALSE                 | TRUE                  | TRUE                   | TRUE                  | FALSE                | ASD              | 3                                 | 1                                             | 2                                     | 1                                              | HC-NDD                     |
| NCKAP1    | FALSE                 | TRUE                  | FALSE                  | TRUE                  | FALSE                | ASD              | 1                                 | 0                                             | 0                                     | 0                                              | HC-NDD                     |
| NRXN3     | FALSE                 | TRUE                  | FALSE                  | TRUE                  | FALSE                | ASD              | 6                                 | 2                                             | 2                                     | 1                                              | HC-NDD                     |
| OBSCN     | FALSE                 | TRUE                  | FALSE                  | TRUE                  | FALSE                | ASD              | 1                                 | 1                                             | 0                                     | 1                                              | Candidate-NDD              |
| PRDM16    | FALSE                 | TRUE                  | FALSE                  | TRUE                  | FALSE                | ASD              | 0                                 | 2                                             | 0                                     | 0                                              | Candidate-NDD              |
| PRR12     | FALSE                 | TRUE                  | TRUE                   | TRUE                  | FALSE                | ASD              | 2                                 | 0                                             | 1                                     | 0                                              | HC-NDD                     |
| PSMD12    | FALSE                 | TRUE                  | FALSE                  | TRUE                  | FALSE                | ASD              | 1                                 | 0                                             | 0                                     | 0                                              | HC-NDD                     |
| PTPRF     | FALSE                 | TRUE                  | FALSE                  | TRUE                  | FALSE                | ASD              | 1                                 | 0                                             | 0                                     | 0                                              | Candidate-NDD              |
| RAB11FIP4 | FALSE                 | TRUE                  | FALSE                  | TRUE                  | FALSE                | ASD              | 1                                 | 0                                             | 1                                     | 0                                              | Candidate-NDD              |
| RALGAPB   | FALSE                 | TRUE                  | FALSE                  | TRUE                  | FALSE                | ASD              | 2                                 | 0                                             | 0                                     | 0                                              | HC-NDD                     |
| SIN3A     | FALSE                 | TRUE                  | TRUE                   | TRUE                  | FALSE                | ASD              | 1                                 | 0                                             | 0                                     | 0                                              | HC-NDD                     |
| SLC6A2    | FALSE                 | TRUE                  | FALSE                  | TRUE                  | FALSE                | ASD              | 0                                 | 1                                             | 0                                     | 0                                              | Candidate-NDD              |
| SLC9A3    | FALSE                 | TRUE                  | FALSE                  | TRUE                  | FALSE                | ASD              | 3                                 | 1                                             | 1                                     | 0                                              | Candidate-NDD              |
| SMARCA2   | FALSE                 | TRUE                  | TRUE                   | TRUE                  | FALSE                | ASD              | 1                                 | 1                                             | 1                                     | 1                                              | HC-NDD                     |
| SPEN      | FALSE                 | TRUE                  | TRUE                   | TRUE                  | FALSE                | ASD              | 1                                 | 1                                             | 0                                     | 0                                              | HC-NDD                     |
| TAF4      | FALSE                 | TRUE                  | FALSE                  | TRUE                  | FALSE                | ASD              | 2                                 | 0                                             | 0                                     | 0                                              | Candidate-NDD              |
| UBR5      | FALSE                 | TRUE                  | TRUE                   | TRUE                  | FALSE                | ASD              | 3                                 | 0                                             | 3                                     | 0                                              | Candidate-NDD              |
| XPO1      | FALSE                 | TRUE                  | TRUE                   | TRUE                  | FALSE                | ASD              | 0                                 | 1                                             | 0                                     | 1                                              | Candidate-NDD              |
| YWHAG     | FALSE                 | TRUE                  | TRUE                   | TRUE                  | FALSE                | ASD              | 1                                 | 0                                             | 0                                     | 0                                              | HC-NDD                     |
| CELF4     | FALSE                 | FALSE                 | FALSE                  | TRUE                  | TRUE                 | ASD              | 1                                 | 0                                             | 1                                     | 0                                              | HC-NDD                     |
| CORO2B    | FALSE                 | FALSE                 | FALSE                  | FALSE                 | TRUE                 | ASD              | 1                                 | 0                                             | 0                                     | 0                                              | Candidate-NDD              |
| DMPK      | FALSE                 | FALSE                 | FALSE                  | TRUE                  | TRUE                 | ASD              | 1                                 | 0                                             | 0                                     | 0                                              | HC-NDD                     |
| EPOR      | FALSE                 | FALSE                 | FALSE                  | FALSE                 | TRUE                 | ASD              | 2                                 | 0                                             | 0                                     | 0                                              |                            |
| ITGB4     | FALSE                 | FALSE                 | FALSE                  | FALSE                 | TRUE                 | ASD              | 1                                 | 1                                             | 0                                     | 0                                              | Candidate-NDD              |
| KIF5C     | FALSE                 | FALSE                 | TRUE                   | TRUE                  | TRUE                 | ASD              | 1                                 | 0                                             | 0                                     | 0                                              | HC-NDD                     |
| PLXNB1    | FALSE                 | FALSE                 | FALSE                  | FALSE                 | TRUE                 | ASD              | 3                                 | 0                                             | 2                                     | 0                                              | Candidate-NDD              |
| PSMD6     | FALSE                 | FALSE                 | FALSE                  | FALSE                 | TRUE                 | ASD              | 2                                 | 1                                             | 1                                     | 0                                              | Candidate-NDD              |
| RUNX1T1   | FALSE                 | FALSE                 | FALSE                  | TRUE                  | TRUE                 | ASD              | 1                                 | 0                                             | 1                                     | 0                                              | Candidate-NDD              |
| TANC2     | FALSE                 | FALSE                 | TRUE                   | TRUE                  | TRUE                 | ASD              | 1                                 | 0                                             | 1                                     | 0                                              | HC-NDD                     |
| TBCEL     | FALSE                 | FALSE                 | FALSE                  | TRUE                  | TRUE                 | ASD              | 1                                 | 0                                             | 1                                     | 0                                              | Candidate-NDD              |

|          |       |       |       |      |       |     |   |   |   |   |               |
|----------|-------|-------|-------|------|-------|-----|---|---|---|---|---------------|
| TRAF7    | FALSE | FALSE | TRUE  | TRUE | TRUE  | ASD | 1 | 0 | 0 | 0 | HC-NDD        |
| WDFY3    | FALSE | FALSE | FALSE | TRUE | TRUE  | ASD | 1 | 0 | 0 | 0 | HC-NDD        |
| ADNP     | TRUE  | TRUE  | TRUE  | TRUE | TRUE  | ASD | 0 | 0 | 0 | 0 | HC-NDD        |
| AP2S1    | TRUE  | TRUE  | TRUE  | TRUE | TRUE  | ASD | 0 | 0 | 0 | 0 | HC-NDD        |
| ASXL3    | TRUE  | TRUE  | TRUE  | TRUE | TRUE  | ASD | 0 | 0 | 0 | 0 | HC-NDD        |
| AUTS2    | TRUE  | TRUE  | TRUE  | TRUE | TRUE  | ASD | 0 | 0 | 0 | 0 | HC-NDD        |
| CUL3     | TRUE  | TRUE  | TRUE  | TRUE | TRUE  | ASD | 0 | 0 | 0 | 0 | HC-NDD        |
| DEAF1    | TRUE  | TRUE  | TRUE  | TRUE | TRUE  | ASD | 0 | 0 | 0 | 0 | HC-NDD        |
| DLG4     | TRUE  | TRUE  | TRUE  | TRUE | TRUE  | ASD | 0 | 0 | 0 | 0 | HC-NDD        |
| DNMT3A   | TRUE  | TRUE  | TRUE  | TRUE | TRUE  | ASD | 0 | 0 | 0 | 0 | HC-NDD        |
| DYRK1A   | TRUE  | TRUE  | TRUE  | TRUE | TRUE  | ASD | 0 | 0 | 0 | 0 | HC-NDD        |
| FOXP1    | TRUE  | TRUE  | TRUE  | TRUE | TRUE  | ASD | 0 | 0 | 0 | 0 | HC-NDD        |
| GABRA1   | TRUE  | TRUE  | TRUE  | TRUE | TRUE  | ASD | 0 | 0 | 0 | 0 | HC-NDD        |
| GIGYF1   | TRUE  | TRUE  | TRUE  | TRUE | TRUE  | ASD | 0 | 0 | 0 | 0 | HC-NDD        |
| IRF2BPL  | TRUE  | TRUE  | TRUE  | TRUE | TRUE  | ASD | 0 | 0 | 0 | 0 | HC-NDD        |
| KCNB1    | TRUE  | TRUE  | TRUE  | TRUE | TRUE  | ASD | 0 | 0 | 0 | 0 | HC-NDD        |
| KDM5B    | TRUE  | TRUE  | TRUE  | TRUE | TRUE  | ASD | 0 | 0 | 0 | 0 | HC-NDD        |
| KDM6B    | TRUE  | TRUE  | TRUE  | TRUE | TRUE  | ASD | 0 | 0 | 0 | 0 | HC-NDD        |
| MBD5     | TRUE  | TRUE  | TRUE  | TRUE | TRUE  | ASD | 0 | 0 | 0 | 0 | HC-NDD        |
| MED13    | TRUE  | TRUE  | TRUE  | TRUE | TRUE  | ASD | 0 | 0 | 0 | 0 | HC-NDD        |
| MED13L   | TRUE  | TRUE  | TRUE  | TRUE | TRUE  | ASD | 0 | 0 | 0 | 0 | HC-NDD        |
| MEIS2    | TRUE  | TRUE  | TRUE  | TRUE | TRUE  | ASD | 0 | 0 | 0 | 0 | HC-NDD        |
| NAA15    | TRUE  | TRUE  | TRUE  | TRUE | TRUE  | ASD | 0 | 0 | 0 | 0 | HC-NDD        |
| PHF21A   | TRUE  | TRUE  | TRUE  | TRUE | TRUE  | ASD | 0 | 0 | 0 | 0 | HC-NDD        |
| POGZ     | TRUE  | TRUE  | TRUE  | TRUE | TRUE  | ASD | 0 | 0 | 0 | 0 | HC-NDD        |
| PTEN     | TRUE  | TRUE  | TRUE  | TRUE | TRUE  | ASD | 0 | 0 | 0 | 0 | HC-NDD        |
| SATB2    | TRUE  | TRUE  | TRUE  | TRUE | TRUE  | ASD | 0 | 0 | 0 | 0 | HC-NDD        |
| SETD5    | TRUE  | TRUE  | TRUE  | TRUE | TRUE  | ASD | 0 | 0 | 0 | 0 | HC-NDD        |
| SKI      | TRUE  | TRUE  | TRUE  | TRUE | TRUE  | ASD | 0 | 0 | 0 | 0 | HC-NDD        |
| STXBP1   | TRUE  | TRUE  | TRUE  | TRUE | TRUE  | ASD | 0 | 0 | 0 | 0 | HC-NDD        |
| SUV420H1 | TRUE  | TRUE  | TRUE  | TRUE | TRUE  | ASD | 0 | 0 | 0 | 0 | HC-NDD        |
| SYNGAP1  | TRUE  | TRUE  | TRUE  | TRUE | TRUE  | ASD | 0 | 0 | 0 | 0 | HC-NDD        |
| TAOK1    | TRUE  | TRUE  | TRUE  | TRUE | TRUE  | ASD | 0 | 0 | 0 | 0 | HC-NDD        |
| TCF20    | TRUE  | TRUE  | TRUE  | TRUE | TRUE  | ASD | 0 | 0 | 0 | 0 | HC-NDD        |
| TLK2     | TRUE  | TRUE  | TRUE  | TRUE | TRUE  | ASD | 0 | 0 | 0 | 0 | HC-NDD        |
| VEZF1    | TRUE  | TRUE  | TRUE  | TRUE | TRUE  | ASD | 0 | 0 | 0 | 0 | HC-NDD        |
| DLL1     | TRUE  | TRUE  | TRUE  | TRUE | FALSE | ASD | 0 | 0 | 0 | 0 | HC-NDD        |
| MED23    | TRUE  | TRUE  | TRUE  | TRUE | FALSE | ASD | 0 | 0 | 0 | 0 | HC-NDD        |
| PIK3CA   | TRUE  | TRUE  | TRUE  | TRUE | FALSE | ASD | 0 | 0 | 0 | 0 | HC-NDD        |
| SPAST    | TRUE  | TRUE  | TRUE  | TRUE | FALSE | ASD | 0 | 0 | 0 | 0 | HC-NDD        |
| CAMTA2   | FALSE | TRUE  | TRUE  | TRUE | TRUE  | ASD | 0 | 0 | 0 | 0 | Candidate-NDD |
| CSNK2A1  | FALSE | TRUE  | TRUE  | TRUE | TRUE  | ASD | 0 | 0 | 0 | 0 | HC-NDD        |
| HNRNPD   | FALSE | TRUE  | TRUE  | TRUE | TRUE  | ASD | 0 | 0 | 0 | 0 | HC-NDD        |
| HNRNPUL2 | FALSE | TRUE  | FALSE | TRUE | TRUE  | ASD | 0 | 0 | 0 | 0 | HC-NDD        |
| MARK2    | FALSE | TRUE  | TRUE  | TRUE | TRUE  | ASD | 0 | 0 | 0 | 0 | Candidate-NDD |
| MYT1L    | FALSE | TRUE  | TRUE  | TRUE | TRUE  | ASD | 0 | 0 | 0 | 0 | HC-NDD        |
| PAX5     | FALSE | TRUE  | TRUE  | TRUE | TRUE  | ASD | 0 | 0 | 0 | 0 | HC-NDD        |
| PBX1     | FALSE | TRUE  | TRUE  | TRUE | TRUE  | ASD | 0 | 0 | 0 | 0 | HC-NDD        |
| PHF12    | FALSE | TRUE  | TRUE  | TRUE | TRUE  | ASD | 0 | 0 | 0 | 0 | HC-NDD        |
| PSMD11   | FALSE | TRUE  | FALSE | TRUE | TRUE  | ASD | 0 | 0 | 0 | 0 | Candidate-NDD |
| RAI1     | FALSE | TRUE  | TRUE  | TRUE | TRUE  | ASD | 0 | 0 | 0 | 0 | HC-NDD        |
| SRPR     | FALSE | TRUE  | TRUE  | TRUE | TRUE  | ASD | 0 | 0 | 0 | 0 | HC-NDD        |
| SYNCRIP  | FALSE | TRUE  | TRUE  | TRUE | TRUE  | ASD | 0 | 0 | 0 | 0 | HC-NDD        |
| SYT1     | FALSE | TRUE  | TRUE  | TRUE | TRUE  | ASD | 0 | 0 | 0 | 0 | HC-NDD        |
| TBL1XR1  | FALSE | TRUE  | TRUE  | TRUE | TRUE  | ASD | 0 | 0 | 0 | 0 | HC-NDD        |
| TBR1     | FALSE | TRUE  | TRUE  | TRUE | TRUE  | ASD | 0 | 0 | 0 | 0 | HC-NDD        |
| TCF4     | FALSE | TRUE  | TRUE  | TRUE | TRUE  | ASD | 0 | 0 | 0 | 0 | HC-NDD        |
| TNPO3    | FALSE | TRUE  | TRUE  | TRUE | TRUE  | ASD | 0 | 0 | 0 | 0 | Candidate-NDD |
| ACLY     | FALSE | TRUE  | FALSE | TRUE | FALSE | ASD | 0 | 0 | 0 | 0 | Candidate-NDD |
| ADCY5    | FALSE | TRUE  | TRUE  | TRUE | FALSE | ASD | 0 | 0 | 0 | 0 | Candidate-NDD |
| ATG13    | FALSE | TRUE  | FALSE | TRUE | FALSE | ASD | 0 | 0 | 0 | 0 | Candidate-NDD |
| ATG9B    | FALSE | TRUE  | FALSE | TRUE | FALSE | ASD | 0 | 0 | 0 | 0 | .             |
| ATP1A3   | FALSE | TRUE  | TRUE  | TRUE | FALSE | ASD | 0 | 0 | 0 | 0 | HC-NDD        |
| C16orf72 | FALSE | TRUE  | FALSE | TRUE | FALSE | ASD | 0 | 0 | 0 | 0 | Candidate-NDD |
| CACNA1E  | FALSE | TRUE  | TRUE  | TRUE | FALSE | ASD | 0 | 0 | 0 | 0 | HC-NDD        |
| CAMK2A   | FALSE | TRUE  | TRUE  | TRUE | FALSE | ASD | 0 | 0 | 0 | 0 | HC-NDD        |
| CELF2    | FALSE | TRUE  | TRUE  | TRUE | FALSE | ASD | 0 | 0 | 0 | 0 | HC-NDD        |
| CGREF1   | FALSE | TRUE  | FALSE | TRUE | FALSE | ASD | 0 | 0 | 0 | 0 | Candidate-NDD |
| CORO1A   | FALSE | TRUE  | FALSE | TRUE | FALSE | ASD | 0 | 0 | 0 | 0 | HC-NDD        |
| CREBBP   | FALSE | TRUE  | TRUE  | TRUE | FALSE | ASD | 0 | 0 | 0 | 0 | HC-NDD        |
| CSNK1E   | FALSE | TRUE  | TRUE  | TRUE | FALSE | ASD | 0 | 0 | 0 | 0 | Candidate-NDD |
| CYLD     | FALSE | TRUE  | FALSE | TRUE | FALSE | ASD | 0 | 0 | 0 | 0 | Candidate-NDD |
| DEDD     | FALSE | TRUE  | FALSE | TRUE | FALSE | ASD | 0 | 0 | 0 | 0 | Candidate-NDD |
| EFTUD2   | FALSE | TRUE  | TRUE  | TRUE | FALSE | ASD | 0 | 0 | 0 | 0 | HC-NDD        |
| FAM120A  | FALSE | TRUE  | FALSE | TRUE | FALSE | ASD | 0 | 0 | 0 | 0 | Candidate-NDD |
| FBXO11   | FALSE | TRUE  | TRUE  | TRUE | FALSE | ASD | 0 | 0 | 0 | 0 | HC-NDD        |
| GABRB3   | FALSE | TRUE  | TRUE  | TRUE | FALSE | ASD | 0 | 0 | 0 | 0 | HC-NDD        |
| H3F3A    | FALSE | TRUE  | TRUE  | TRUE | FALSE | ASD | 0 | 0 | 0 | 0 | HC-NDD        |
| INO80D   | FALSE | TRUE  | FALSE | TRUE | FALSE | ASD | 0 | 0 | 0 | 0 | Candidate-NDD |
| ITSN1    | FALSE | TRUE  | FALSE | TRUE | FALSE | ASD | 0 | 0 | 0 | 0 | HC-NDD        |
| KCNH7    | FALSE | TRUE  | FALSE | TRUE | FALSE | ASD | 0 | 0 | 0 | 0 | .             |
| KDM3B    | FALSE | TRUE  | TRUE  | TRUE | FALSE | ASD | 0 | 0 | 0 | 0 | HC-NDD        |
| KPNA1    | FALSE | TRUE  | FALSE | TRUE | FALSE | ASD | 0 | 0 | 0 | 0 | Candidate-NDD |
| MEF2C    | FALSE | TRUE  | TRUE  | TRUE | FALSE | ASD | 0 | 0 | 0 | 0 | HC-NDD        |
| MLXIP    | FALSE | TRUE  | FALSE | TRUE | FALSE | ASD | 0 | 0 | 0 | 0 | Candidate-NDD |
| MRFAP1   | FALSE | TRUE  | FALSE | TRUE | FALSE | ASD | 0 | 0 | 0 | 0 | .             |
| MYO18A   | FALSE | TRUE  | FALSE | TRUE | FALSE | ASD | 0 | 0 | 0 | 0 | Candidate-NDD |
| NAA25    | FALSE | TRUE  | FALSE | TRUE | FALSE | ASD | 0 | 0 | 0 | 0 | Candidate-NDD |
| NACC1    | FALSE | TRUE  | TRUE  | TRUE | FALSE | ASD | 0 | 0 | 0 | 0 | HC-NDD        |
| NAV3     | FALSE | TRUE  | FALSE | TRUE | FALSE | ASD | 0 | 0 | 0 | 0 | Candidate-NDD |
| PACS1    | FALSE | TRUE  | TRUE  | TRUE | FALSE | ASD | 0 | 0 | 0 | 0 | HC-NDD        |
| PHF2     | FALSE | TRUE  | FALSE | TRUE | FALSE | ASD | 0 | 0 | 0 | 0 | HC-NDD        |
| PPP1R9B  | FALSE | TRUE  | FALSE | TRUE | FALSE | ASD | 0 | 0 | 0 | 0 | HC-NDD        |
| PRH1     | FALSE | TRUE  | FALSE | TRUE | FALSE | ASD | 0 | 0 | 0 | 0 | .             |
| PTGDR2   | FALSE | TRUE  | FALSE | TRUE | FALSE | ASD | 0 | 0 | 0 | 0 | .             |
| ROPN1    | FALSE | TRUE  | FALSE | TRUE | FALSE | ASD | 0 | 0 | 0 | 0 | .             |
| SYK      | FALSE | TRUE  | FALSE | TRUE | FALSE | ASD | 0 | 0 | 0 | 0 | Candidate-NDD |
| TLE4     | FALSE | TRUE  | FALSE | TRUE | FALSE | ASD | 0 | 0 | 0 | 0 | Candidate-NDD |
| TRAF2    | FALSE | TRUE  | FALSE | TRUE | FALSE | ASD | 0 | 0 | 0 | 0 | Candidate-NDD |
| USP49    | FALSE | TRUE  | FALSE | TRUE | FALSE | ASD | 0 | 0 | 0 | 0 | Candidate-NDD |
| ZMYM2    | FALSE | TRUE  | TRUE  | TRUE | FALSE | ASD | 0 | 0 | 0 | 0 | HC-NDD        |

|          |       |       |       |       |       |     |   |   |   |   |               |
|----------|-------|-------|-------|-------|-------|-----|---|---|---|---|---------------|
| ZNF292   | FALSE | TRUE  | TRUE  | TRUE  | FALSE | ASD | 0 | 0 | 0 | 0 | HC-NDD        |
| ZNF462   | FALSE | TRUE  | TRUE  | TRUE  | FALSE | ASD | 0 | 0 | 0 | 0 | HC-NDD        |
| ABCE1    | FALSE | FALSE | FALSE | FALSE | TRUE  | ASD | 0 | 0 | 0 | 0 | Candidate-NDD |
| ANP32A   | FALSE | FALSE | FALSE | FALSE | TRUE  | ASD | 0 | 0 | 0 | 0 | Candidate-NDD |
| ARF3     | FALSE | FALSE | FALSE | TRUE  | TRUE  | ASD | 0 | 0 | 0 | 0 | Candidate-NDD |
| BCL11A   | FALSE | FALSE | TRUE  | TRUE  | TRUE  | ASD | 0 | 0 | 0 | 0 | HC-NDD        |
| CASZ1    | FALSE | FALSE | TRUE  | TRUE  | TRUE  | ASD | 0 | 0 | 0 | 0 | HC-NDD        |
| CNOT3    | FALSE | FALSE | TRUE  | TRUE  | TRUE  | ASD | 0 | 0 | 0 | 0 | HC-NDD        |
| CPSF7    | FALSE | FALSE | FALSE | TRUE  | TRUE  | ASD | 0 | 0 | 0 | 0 | Candidate-NDD |
| DMWD     | FALSE | FALSE | FALSE | FALSE | TRUE  | ASD | 0 | 0 | 0 | 0 | Candidate-NDD |
| EIF4E    | FALSE | FALSE | FALSE | FALSE | TRUE  | ASD | 0 | 0 | 0 | 0 | Candidate-NDD |
| ENC1     | FALSE | FALSE | FALSE | FALSE | TRUE  | ASD | 0 | 0 | 0 | 0 | Candidate-NDD |
| FUBP3    | FALSE | FALSE | FALSE | FALSE | TRUE  | ASD | 0 | 0 | 0 | 0 | .             |
| G3BP1    | FALSE | FALSE | FALSE | FALSE | TRUE  | ASD | 0 | 0 | 0 | 0 | .             |
| GNAI1    | FALSE | FALSE | TRUE  | TRUE  | TRUE  | ASD | 0 | 0 | 0 | 0 | HC-NDD        |
| LDB1     | FALSE | FALSE | FALSE | TRUE  | TRUE  | ASD | 0 | 0 | 0 | 0 | HC-NDD        |
| MAP1A    | FALSE | FALSE | FALSE | FALSE | TRUE  | ASD | 0 | 0 | 0 | 0 | HC-NDD        |
| MBD6     | FALSE | FALSE | FALSE | FALSE | TRUE  | ASD | 0 | 0 | 0 | 0 | Candidate-NDD |
| MIB1     | FALSE | FALSE | TRUE  | TRUE  | TRUE  | ASD | 0 | 0 | 0 | 0 | Candidate-NDD |
| MKX      | FALSE | FALSE | FALSE | TRUE  | TRUE  | ASD | 0 | 0 | 0 | 0 | HC-NDD        |
| MSL2     | FALSE | FALSE | TRUE  | TRUE  | TRUE  | ASD | 0 | 0 | 0 | 0 | Candidate-NDD |
| NR4A2    | FALSE | FALSE | TRUE  | TRUE  | TRUE  | ASD | 0 | 0 | 0 | 0 | HC-NDD        |
| NUP155   | FALSE | FALSE | FALSE | FALSE | TRUE  | ASD | 0 | 0 | 0 | 0 | HC-NDD        |
| PAPOLG   | FALSE | FALSE | FALSE | TRUE  | TRUE  | ASD | 0 | 0 | 0 | 0 | Candidate-NDD |
| PHF3     | FALSE | FALSE | FALSE | FALSE | TRUE  | ASD | 0 | 0 | 0 | 0 | HC-NDD        |
| PPP2R5D  | FALSE | FALSE | TRUE  | TRUE  | TRUE  | ASD | 0 | 0 | 0 | 0 | HC-NDD        |
| PRKG2    | FALSE | FALSE | FALSE | FALSE | TRUE  | ASD | 0 | 0 | 0 | 0 | Candidate-NDD |
| PRR14L   | FALSE | FALSE | FALSE | FALSE | TRUE  | ASD | 0 | 0 | 0 | 0 | Candidate-NDD |
| QRICH1   | FALSE | FALSE | TRUE  | TRUE  | TRUE  | ASD | 0 | 0 | 0 | 0 | HC-NDD        |
| SETD1A   | FALSE | FALSE | TRUE  | TRUE  | TRUE  | ASD | 0 | 0 | 0 | 0 | HC-NDD        |
| SOX5     | FALSE | FALSE | TRUE  | TRUE  | TRUE  | ASD | 0 | 0 | 0 | 0 | HC-NDD        |
| SPRY2    | FALSE | FALSE | FALSE | TRUE  | TRUE  | ASD | 0 | 0 | 0 | 0 | Candidate-NDD |
| TERF2    | FALSE | FALSE | FALSE | FALSE | TRUE  | ASD | 0 | 0 | 0 | 0 | Candidate-NDD |
| TM9SF4   | FALSE | FALSE | FALSE | TRUE  | TRUE  | ASD | 0 | 0 | 0 | 0 | HC-NDD        |
| TSHZ1    | FALSE | FALSE | FALSE | FALSE | TRUE  | ASD | 0 | 0 | 0 | 0 | Candidate-NDD |
| ZBTB21   | FALSE | FALSE | FALSE | TRUE  | TRUE  | ASD | 0 | 0 | 0 | 0 | Candidate-NDD |
| ABL1     | FALSE | FALSE | TRUE  | TRUE  | FALSE | NDD | 1 | 1 | 0 | 0 | Candidate-NDD |
| AP3B2    | FALSE | FALSE | TRUE  | TRUE  | FALSE | NDD | 1 | 0 | 0 | 0 | HC-NDD        |
| ARID2    | FALSE | FALSE | TRUE  | TRUE  | FALSE | NDD | 2 | 0 | 1 | 0 | HC-NDD        |
| ASXL1    | FALSE | FALSE | TRUE  | TRUE  | FALSE | NDD | 1 | 0 | 1 | 0 | HC-NDD        |
| BRD4     | FALSE | FALSE | TRUE  | TRUE  | FALSE | NDD | 1 | 1 | 0 | 0 | HC-NDD        |
| BRPF1    | FALSE | FALSE | TRUE  | TRUE  | FALSE | NDD | 1 | 1 | 0 | 0 | HC-NDD        |
| CACNA1C  | FALSE | FALSE | TRUE  | TRUE  | FALSE | NDD | 1 | 0 | 0 | 0 | HC-NDD        |
| CACNA1G  | FALSE | FALSE | TRUE  | TRUE  | FALSE | NDD | 1 | 0 | 0 | 0 | HC-NDD        |
| CAMK2G   | FALSE | FALSE | TRUE  | TRUE  | FALSE | NDD | 2 | 0 | 1 | 0 | Candidate-NDD |
| CAMTA1   | FALSE | FALSE | TRUE  | TRUE  | FALSE | NDD | 2 | 3 | 0 | 2 | HC-NDD        |
| CNOT1    | FALSE | FALSE | TRUE  | TRUE  | FALSE | NDD | 1 | 1 | 0 | 0 | HC-NDD        |
| COL4A1   | FALSE | FALSE | TRUE  | TRUE  | FALSE | NDD | 1 | 1 | 0 | 0 | HC-NDD        |
| CTNND1   | FALSE | FALSE | TRUE  | TRUE  | FALSE | NDD | 1 | 1 | 0 | 0 | HC-NDD        |
| CTR9     | FALSE | FALSE | TRUE  | TRUE  | FALSE | NDD | 1 | 1 | 1 | 1 | Candidate-NDD |
| DHX30    | FALSE | FALSE | TRUE  | TRUE  | FALSE | NDD | 2 | 1 | 2 | 1 | HC-NDD        |
| DNM1L    | FALSE | FALSE | TRUE  | TRUE  | FALSE | NDD | 0 | 1 | 0 | 0 | HC-NDD        |
| ERF      | FALSE | FALSE | TRUE  | TRUE  | FALSE | NDD | 2 | 0 | 1 | 0 | HC-NDD        |
| FBN1     | FALSE | FALSE | TRUE  | TRUE  | FALSE | NDD | 2 | 1 | 2 | 0 | Candidate-NDD |
| GLI3     | FALSE | FALSE | TRUE  | TRUE  | FALSE | NDD | 1 | 0 | 1 | 0 | HC-NDD        |
| HECW2    | FALSE | FALSE | TRUE  | TRUE  | FALSE | NDD | 3 | 0 | 2 | 0 | HC-NDD        |
| HIST1H4J | FALSE | FALSE | TRUE  | TRUE  | FALSE | NDD | 1 | 0 | 0 | 0 | Candidate-NDD |
| ITPR1    | FALSE | FALSE | TRUE  | TRUE  | FALSE | NDD | 1 | 1 | 1 | 0 | HC-NDD        |
| KANSL1   | FALSE | FALSE | TRUE  | TRUE  | FALSE | NDD | 1 | 0 | 0 | 0 | HC-NDD        |
| KAT6A    | FALSE | FALSE | TRUE  | TRUE  | FALSE | NDD | 1 | 0 | 0 | 0 | HC-NDD        |
| KAT6B    | FALSE | FALSE | TRUE  | TRUE  | FALSE | NDD | 0 | 1 | 0 | 0 | HC-NDD        |
| KBTBD7   | FALSE | FALSE | TRUE  | TRUE  | FALSE | NDD | 1 | 0 | 0 | 0 | .             |
| KIAA0100 | FALSE | FALSE | TRUE  | TRUE  | FALSE | NDD | 0 | 1 | 0 | 0 | Candidate-NDD |
| KIF11    | FALSE | FALSE | TRUE  | TRUE  | FALSE | NDD | 1 | 1 | 1 | 1 | HC-NDD        |
| KIF1A    | FALSE | FALSE | TRUE  | TRUE  | FALSE | NDD | 2 | 0 | 0 | 0 | HC-NDD        |
| KIF2A    | FALSE | FALSE | TRUE  | TRUE  | FALSE | NDD | 0 | 1 | 0 | 0 | HC-NDD        |
| KMT2D    | FALSE | FALSE | TRUE  | TRUE  | FALSE | NDD | 2 | 2 | 1 | 0 | HC-NDD        |
| LONP1    | FALSE | FALSE | TRUE  | TRUE  | FALSE | NDD | 0 | 1 | 0 | 0 | HC-NDD        |
| MAP3K7   | FALSE | FALSE | TRUE  | TRUE  | FALSE | NDD | 1 | 0 | 0 | 0 | HC-NDD        |
| MORC2    | FALSE | FALSE | TRUE  | TRUE  | FALSE | NDD | 1 | 0 | 0 | 0 | HC-NDD        |
| MSI1     | FALSE | FALSE | TRUE  | TRUE  | FALSE | NDD | 1 | 1 | 1 | 1 | Candidate-NDD |
| MTOR     | FALSE | FALSE | TRUE  | TRUE  | FALSE | NDD | 1 | 0 | 0 | 0 | HC-NDD        |
| MYCN     | FALSE | FALSE | TRUE  | TRUE  | FALSE | NDD | 0 | 1 | 0 | 1 | HC-NDD        |
| NALCN    | FALSE | FALSE | TRUE  | TRUE  | FALSE | NDD | 1 | 0 | 1 | 0 | HC-NDD        |
| NFIA     | FALSE | FALSE | TRUE  | TRUE  | FALSE | NDD | 1 | 0 | 1 | 0 | HC-NDD        |
| NFIB     | FALSE | FALSE | TRUE  | TRUE  | FALSE | NDD | 1 | 1 | 1 | 1 | HC-NDD        |
| NFIX     | FALSE | FALSE | TRUE  | TRUE  | FALSE | NDD | 1 | 0 | 1 | 0 | HC-NDD        |
| NLGN2    | FALSE | FALSE | TRUE  | TRUE  | FALSE | NDD | 4 | 0 | 1 | 0 | HC-NDD        |
| NOTCH1   | FALSE | FALSE | TRUE  | TRUE  | FALSE | NDD | 8 | 1 | 1 | 0 | Candidate-NDD |
| NSD1     | FALSE | FALSE | TRUE  | TRUE  | FALSE | NDD | 1 | 0 | 1 | 0 | HC-NDD        |
| NTRK2    | FALSE | FALSE | TRUE  | TRUE  | FALSE | NDD | 0 | 1 | 0 | 0 | HC-NDD        |
| PAFAH1B1 | FALSE | FALSE | TRUE  | TRUE  | FALSE | NDD | 1 | 0 | 1 | 0 | HC-NDD        |
| PIK3R2   | FALSE | FALSE | TRUE  | TRUE  | FALSE | NDD | 1 | 1 | 0 | 1 | HC-NDD        |
| PPM1D    | FALSE | FALSE | TRUE  | TRUE  | FALSE | NDD | 2 | 0 | 0 | 0 | HC-NDD        |
| PRPF8    | FALSE | FALSE | TRUE  | TRUE  | FALSE | NDD | 1 | 0 | 1 | 0 | Candidate-NDD |
| PSMC3    | FALSE | FALSE | TRUE  | TRUE  | FALSE | NDD | 1 | 0 | 1 | 0 | Candidate-NDD |
| PTCH1    | FALSE | FALSE | TRUE  | TRUE  | FALSE | NDD | 4 | 1 | 1 | 0 | HC-NDD        |
| PTPN11   | FALSE | FALSE | TRUE  | TRUE  | FALSE | NDD | 1 | 0 | 0 | 0 | HC-NDD        |
| PUF60    | FALSE | FALSE | TRUE  | TRUE  | FALSE | NDD | 2 | 0 | 2 | 0 | HC-NDD        |
| RAB11B   | FALSE | FALSE | TRUE  | TRUE  | FALSE | NDD | 1 | 0 | 1 | 0 | HC-NDD        |
| RHOBTB2  | FALSE | FALSE | TRUE  | TRUE  | FALSE | NDD | 1 | 0 | 0 | 0 | HC-NDD        |
| RIT1     | FALSE | FALSE | TRUE  | TRUE  | FALSE | NDD | 1 | 0 | 0 | 0 | HC-NDD        |
| RYR2     | FALSE | FALSE | TRUE  | TRUE  | FALSE | NDD | 3 | 1 | 1 | 0 | Candidate-NDD |
| SEMA6B   | FALSE | FALSE | TRUE  | TRUE  | FALSE | NDD | 2 | 1 | 2 | 1 | HC-NDD        |
| SETD1B   | FALSE | FALSE | TRUE  | TRUE  | FALSE | NDD | 5 | 2 | 1 | 0 | HC-NDD        |
| SETD2    | FALSE | FALSE | TRUE  | TRUE  | FALSE | NDD | 0 | 1 | 0 | 0 | HC-NDD        |
| SF3B2    | FALSE | FALSE | TRUE  | TRUE  | FALSE | NDD | 1 | 0 | 1 | 0 | Candidate-NDD |
| SLC2A1   | FALSE | FALSE | TRUE  | TRUE  | FALSE | NDD | 1 | 0 | 0 | 0 | HC-NDD        |
| SMARCA4  | FALSE | FALSE | TRUE  | TRUE  | FALSE | NDD | 2 | 2 | 0 | 1 | HC-NDD        |
| SMARCE1  | FALSE | FALSE | TRUE  | TRUE  | FALSE | NDD | 0 | 1 | 0 | 0 | HC-NDD        |
| SOS1     | FALSE | FALSE | TRUE  | TRUE  | FALSE | NDD | 2 | 0 | 0 | 0 | HC-NDD        |

|          |       |       |       |      |       |     |   |   |   |   |               |
|----------|-------|-------|-------|------|-------|-----|---|---|---|---|---------------|
| SOX11    | FALSE | FALSE | TRUE  | TRUE | FALSE | NDD | 1 | 0 | 0 | 0 | HC-NDD        |
| SOX2     | FALSE | FALSE | TRUE  | TRUE | FALSE | NDD | 1 | 0 | 0 | 0 | HC-NDD        |
| SOX9     | FALSE | FALSE | TRUE  | TRUE | FALSE | NDD | 1 | 1 | 0 | 0 | Candidate-NDD |
| SPTAN1   | FALSE | FALSE | TRUE  | TRUE | FALSE | NDD | 2 | 1 | 2 | 1 | HC-NDD        |
| TAB2     | FALSE | FALSE | TRUE  | TRUE | FALSE | NDD | 0 | 1 | 0 | 0 | HC-NDD        |
| TNRC6B   | FALSE | FALSE | TRUE  | TRUE | FALSE | NDD | 0 | 1 | 0 | 0 | HC-NDD        |
| TRPM3    | FALSE | FALSE | TRUE  | TRUE | FALSE | NDD | 1 | 0 | 0 | 0 | HC-NDD        |
| TRRAP    | FALSE | FALSE | TRUE  | TRUE | FALSE | NDD | 1 | 0 | 1 | 0 | HC-NDD        |
| UBTF     | FALSE | FALSE | TRUE  | TRUE | FALSE | NDD | 1 | 1 | 1 | 1 | HC-NDD        |
| WDR26    | FALSE | FALSE | TRUE  | TRUE | FALSE | NDD | 1 | 0 | 0 | 0 | HC-NDD        |
| WDR48    | FALSE | FALSE | TRUE  | TRUE | FALSE | NDD | 0 | 1 | 0 | 0 | Candidate-NDD |
| ZBTB10   | FALSE | FALSE | TRUE  | TRUE | FALSE | NDD | 1 | 0 | 0 | 0 | Candidate-NDD |
| ALDH18A1 | FALSE | FALSE | FALSE | TRUE | FALSE | NDD | 0 | 1 | 0 | 0 | HC-NDD        |
| ANK3     | FALSE | FALSE | FALSE | TRUE | FALSE | NDD | 1 | 1 | 0 | 0 | HC-NDD        |
| ARID5B   | FALSE | FALSE | FALSE | TRUE | FALSE | NDD | 1 | 0 | 0 | 0 | Candidate-NDD |
| ATP1B1   | FALSE | FALSE | FALSE | TRUE | FALSE | NDD | 1 | 0 | 0 | 0 | Candidate-NDD |
| ATP2B1   | FALSE | FALSE | FALSE | TRUE | FALSE | NDD | 0 | 1 | 0 | 1 | Candidate-NDD |
| BRSK1    | FALSE | FALSE | FALSE | TRUE | FALSE | NDD | 1 | 0 | 0 | 0 | Candidate-NDD |
| BRWD1    | FALSE | FALSE | FALSE | TRUE | FALSE | NDD | 1 | 0 | 0 | 0 | Candidate-NDD |
| C3       | FALSE | FALSE | FALSE | TRUE | FALSE | NDD | 1 | 0 | 0 | 0 | Candidate-NDD |
| CASKIN2  | FALSE | FALSE | FALSE | TRUE | FALSE | NDD | 1 | 0 | 0 | 0 | Candidate-NDD |
| CDC42BPB | FALSE | FALSE | FALSE | TRUE | FALSE | NDD | 3 | 0 | 1 | 0 | HC-NDD        |
| CLPTM1   | FALSE | FALSE | FALSE | TRUE | FALSE | NDD | 3 | 0 | 0 | 0 | Candidate-NDD |
| CPD      | FALSE | FALSE | FALSE | TRUE | FALSE | NDD | 1 | 1 | 0 | 0 | .             |
| CSDE1    | FALSE | FALSE | FALSE | TRUE | FALSE | NDD | 1 | 0 | 0 | 0 | HC-NDD        |
| CUX2     | FALSE | FALSE | FALSE | TRUE | FALSE | NDD | 2 | 3 | 0 | 0 | HC-NDD        |
| DDB1     | FALSE | FALSE | FALSE | TRUE | FALSE | NDD | 2 | 2 | 2 | 2 | HC-NDD        |
| EIF4A2   | FALSE | FALSE | FALSE | TRUE | FALSE | NDD | 1 | 0 | 1 | 0 | Candidate-NDD |
| ELAVL3   | FALSE | FALSE | FALSE | TRUE | FALSE | NDD | 1 | 0 | 0 | 0 | HC-NDD        |
| ERLIN1   | FALSE | FALSE | FALSE | TRUE | FALSE | NDD | 1 | 0 | 1 | 0 | Candidate-NDD |
| FBN2     | FALSE | FALSE | FALSE | TRUE | FALSE | NDD | 0 | 1 | 0 | 0 | Candidate-NDD |
| FRMD5    | FALSE | FALSE | FALSE | TRUE | FALSE | NDD | 1 | 2 | 0 | 0 | Candidate-NDD |
| GAPVD1   | FALSE | FALSE | FALSE | TRUE | FALSE | NDD | 1 | 1 | 0 | 1 | Candidate-NDD |
| HDLBP    | FALSE | FALSE | FALSE | TRUE | FALSE | NDD | 0 | 1 | 0 | 0 | HC-NDD        |
| HECTD1   | FALSE | FALSE | FALSE | TRUE | FALSE | NDD | 1 | 0 | 1 | 0 | Candidate-NDD |
| HIC2     | FALSE | FALSE | FALSE | TRUE | FALSE | NDD | 1 | 0 | 1 | 0 | Candidate-NDD |
| HNF4A    | FALSE | FALSE | FALSE | TRUE | FALSE | NDD | 1 | 0 | 0 | 0 | Candidate-NDD |
| INHBA    | FALSE | FALSE | FALSE | TRUE | FALSE | NDD | 1 | 1 | 0 | 0 | Candidate-NDD |
| JAG1     | FALSE | FALSE | FALSE | TRUE | FALSE | NDD | 1 | 1 | 0 | 0 | Candidate-NDD |
| KBTBD6   | FALSE | FALSE | FALSE | TRUE | FALSE | NDD | 1 | 0 | 1 | 0 | Candidate-NDD |
| KDM1A    | FALSE | FALSE | FALSE | TRUE | FALSE | NDD | 1 | 1 | 0 | 0 | HC-NDD        |
| KIAA1109 | FALSE | FALSE | FALSE | TRUE | FALSE | NDD | 1 | 0 | 0 | 0 | HC-NDD        |
| LARP1    | FALSE | FALSE | FALSE | TRUE | FALSE | NDD | 0 | 1 | 0 | 0 | Candidate-NDD |
| LRFN3    | FALSE | FALSE | FALSE | TRUE | FALSE | NDD | 0 | 1 | 0 | 0 | Candidate-NDD |
| MED24    | FALSE | FALSE | FALSE | TRUE | FALSE | NDD | 1 | 0 | 1 | 0 | .             |
| MSANTD2  | FALSE | FALSE | FALSE | TRUE | FALSE | NDD | 1 | 0 | 1 | 0 | Candidate-NDD |
| MYH3     | FALSE | FALSE | FALSE | TRUE | FALSE | NDD | 2 | 0 | 0 | 0 | Candidate-NDD |
| NPR1     | FALSE | FALSE | FALSE | TRUE | FALSE | NDD | 2 | 0 | 1 | 0 | .             |
| PAK1     | FALSE | FALSE | FALSE | TRUE | FALSE | NDD | 0 | 1 | 0 | 1 | HC-NDD        |
| PAX2     | FALSE | FALSE | FALSE | TRUE | FALSE | NDD | 1 | 0 | 1 | 0 | Candidate-NDD |
| PDE10A   | FALSE | FALSE | FALSE | TRUE | FALSE | NDD | 1 | 0 | 0 | 0 | Candidate-NDD |
| PRKCB    | FALSE | FALSE | FALSE | TRUE | FALSE | NDD | 3 | 0 | 3 | 0 | Candidate-NDD |
| PUM2     | FALSE | FALSE | FALSE | TRUE | FALSE | NDD | 1 | 1 | 0 | 0 | Candidate-NDD |
| RBBP4    | FALSE | FALSE | FALSE | TRUE | FALSE | NDD | 1 | 0 | 0 | 0 | Candidate-NDD |
| SALL3    | FALSE | FALSE | FALSE | TRUE | FALSE | NDD | 3 | 2 | 0 | 0 | .             |
| SBNO2    | FALSE | FALSE | FALSE | TRUE | FALSE | NDD | 1 | 0 | 1 | 0 | .             |
| SCAF1    | FALSE | FALSE | FALSE | TRUE | FALSE | NDD | 2 | 1 | 1 | 0 | Candidate-NDD |
| SCAPER   | FALSE | FALSE | FALSE | TRUE | FALSE | NDD | 1 | 0 | 1 | 0 | HC-NDD        |
| SCN3A    | FALSE | FALSE | FALSE | TRUE | FALSE | NDD | 2 | 1 | 2 | 1 | HC-NDD        |
| SCUBE3   | FALSE | FALSE | FALSE | TRUE | FALSE | NDD | 1 | 0 | 0 | 0 | Candidate-NDD |
| SF1      | FALSE | FALSE | FALSE | TRUE | FALSE | NDD | 2 | 1 | 1 | 0 | Candidate-NDD |
| SF3B3    | FALSE | FALSE | FALSE | TRUE | FALSE | NDD | 1 | 1 | 1 | 1 | Candidate-NDD |
| SNRNP200 | FALSE | FALSE | FALSE | TRUE | FALSE | NDD | 4 | 1 | 2 | 0 | Candidate-NDD |
| SOX4     | FALSE | FALSE | FALSE | TRUE | FALSE | NDD | 1 | 0 | 0 | 0 | HC-NDD        |
| STAT1    | FALSE | FALSE | FALSE | TRUE | FALSE | NDD | 1 | 0 | 1 | 0 | Candidate-NDD |
| STX1B    | FALSE | FALSE | FALSE | TRUE | FALSE | NDD | 2 | 0 | 0 | 0 | HC-NDD        |
| SUPT6H   | FALSE | FALSE | FALSE | TRUE | FALSE | NDD | 1 | 1 | 1 | 1 | Candidate-NDD |
| TAOK3    | FALSE | FALSE | FALSE | TRUE | FALSE | NDD | 2 | 1 | 0 | 0 | Candidate-NDD |
| TBX3     | FALSE | FALSE | FALSE | TRUE | FALSE | NDD | 1 | 1 | 1 | 1 | Candidate-NDD |
| TERF2IP  | FALSE | FALSE | FALSE | TRUE | FALSE | NDD | 0 | 1 | 0 | 0 | Candidate-NDD |
| TNPO2    | FALSE | FALSE | FALSE | TRUE | FALSE | NDD | 1 | 0 | 1 | 0 | HC-NDD        |
| TNRC6A   | FALSE | FALSE | FALSE | TRUE | FALSE | NDD | 2 | 0 | 0 | 0 | Candidate-NDD |
| ZBTB34   | FALSE | FALSE | FALSE | TRUE | FALSE | NDD | 1 | 0 | 0 | 0 | Candidate-NDD |
| ZNF536   | FALSE | FALSE | FALSE | TRUE | FALSE | NDD | 1 | 3 | 0 | 1 | Candidate-NDD |
| ABCC9    | FALSE | FALSE | TRUE  | TRUE | FALSE | NDD | 0 | 0 | 0 | 0 | HC-NDD        |
| ACTL6B   | FALSE | FALSE | TRUE  | TRUE | FALSE | NDD | 0 | 0 | 0 | 0 | HC-NDD        |
| AFF3     | FALSE | FALSE | TRUE  | TRUE | FALSE | NDD | 0 | 0 | 0 | 0 | Candidate-NDD |
| AGO1     | FALSE | FALSE | TRUE  | TRUE | FALSE | NDD | 0 | 0 | 0 | 0 | HC-NDD        |
| ARF1     | FALSE | FALSE | TRUE  | TRUE | FALSE | NDD | 0 | 0 | 0 | 0 | HC-NDD        |
| ARHGAP35 | FALSE | FALSE | TRUE  | TRUE | FALSE | NDD | 0 | 0 | 0 | 0 | Candidate-NDD |
| ARID1A   | FALSE | FALSE | TRUE  | TRUE | FALSE | NDD | 0 | 0 | 0 | 0 | HC-NDD        |
| ARIH1    | FALSE | FALSE | TRUE  | TRUE | FALSE | NDD | 0 | 0 | 0 | 0 | Candidate-NDD |
| ASXL2    | FALSE | FALSE | TRUE  | TRUE | FALSE | NDD | 0 | 0 | 0 | 0 | HC-NDD        |
| ATF2     | FALSE | FALSE | TRUE  | TRUE | FALSE | NDD | 0 | 0 | 0 | 0 | Candidate-NDD |
| ATP1A2   | FALSE | FALSE | TRUE  | TRUE | FALSE | NDD | 0 | 0 | 0 | 0 | HC-NDD        |
| ATP6V0A1 | FALSE | FALSE | TRUE  | TRUE | FALSE | NDD | 0 | 0 | 0 | 0 | HC-NDD        |
| ATP6V1A  | FALSE | FALSE | TRUE  | TRUE | FALSE | NDD | 0 | 0 | 0 | 0 | HC-NDD        |
| BAI1     | FALSE | FALSE | TRUE  | TRUE | FALSE | NDD | 0 | 0 | 0 | 0 | Candidate-NDD |
| BAP1     | FALSE | FALSE | TRUE  | TRUE | FALSE | NDD | 0 | 0 | 0 | 0 | Candidate-NDD |
| BCL11B   | FALSE | FALSE | TRUE  | TRUE | FALSE | NDD | 0 | 0 | 0 | 0 | HC-NDD        |
| BICD2    | FALSE | FALSE | TRUE  | TRUE | FALSE | NDD | 0 | 0 | 0 | 0 | Candidate-NDD |
| BRAF     | FALSE | FALSE | TRUE  | TRUE | FALSE | NDD | 0 | 0 | 0 | 0 | HC-NDD        |
| BRD3     | FALSE | FALSE | TRUE  | TRUE | FALSE | NDD | 0 | 0 | 0 | 0 | Candidate-NDD |
| CACNA1A  | FALSE | FALSE | TRUE  | TRUE | FALSE | NDD | 0 | 0 | 0 | 0 | HC-NDD        |
| CAMK2B   | FALSE | FALSE | TRUE  | TRUE | FALSE | NDD | 0 | 0 | 0 | 0 | HC-NDD        |
| CBX5     | FALSE | FALSE | TRUE  | TRUE | FALSE | NDD | 0 | 0 | 0 | 0 | Candidate-NDD |
| CDC42    | FALSE | FALSE | TRUE  | TRUE | FALSE | NDD | 0 | 0 | 0 | 0 | HC-NDD        |
| CDK8     | FALSE | FALSE | TRUE  | TRUE | FALSE | NDD | 0 | 0 | 0 | 0 | HC-NDD        |
| CHAMP1   | FALSE | FALSE | TRUE  | TRUE | FALSE | NDD | 0 | 0 | 0 | 0 | HC-NDD        |
| CHD4     | FALSE | FALSE | TRUE  | TRUE | FALSE | NDD | 0 | 0 | 0 | 0 | HC-NDD        |
| CHD7     | FALSE | FALSE | TRUE  | TRUE | FALSE | NDD | 0 | 0 | 0 | 0 | HC-NDD        |

|           |       |       |      |      |       |     |   |   |   |   |               |
|-----------|-------|-------|------|------|-------|-----|---|---|---|---|---------------|
| CIC       | FALSE | FALSE | TRUE | TRUE | FALSE | NDD | 0 | 0 | 0 | 0 | HC-NDD        |
| CLTC      | FALSE | FALSE | TRUE | TRUE | FALSE | NDD | 0 | 0 | 0 | 0 | HC-NDD        |
| COL2A1    | FALSE | FALSE | TRUE | TRUE | FALSE | NDD | 0 | 0 | 0 | 0 | Candidate-NDD |
| COL4A3BP  | FALSE | FALSE | TRUE | TRUE | FALSE | NDD | 0 | 0 | 0 | 0 | HC-NDD        |
| CSNK2B    | FALSE | FALSE | TRUE | TRUE | FALSE | NDD | 0 | 0 | 0 | 0 | HC-NDD        |
| CTBP1     | FALSE | FALSE | TRUE | TRUE | FALSE | NDD | 0 | 0 | 0 | 0 | HC-NDD        |
| DDX23     | FALSE | FALSE | TRUE | TRUE | FALSE | NDD | 0 | 0 | 0 | 0 | HC-NDD        |
| DHDDS     | FALSE | FALSE | TRUE | TRUE | FALSE | NDD | 0 | 0 | 0 | 0 | HC-NDD        |
| DNM1      | FALSE | FALSE | TRUE | TRUE | FALSE | NDD | 0 | 0 | 0 | 0 | HC-NDD        |
| DPF2      | FALSE | FALSE | TRUE | TRUE | FALSE | NDD | 0 | 0 | 0 | 0 | HC-NDD        |
| EEF1A2    | FALSE | FALSE | TRUE | TRUE | FALSE | NDD | 0 | 0 | 0 | 0 | HC-NDD        |
| EIF5A     | FALSE | FALSE | TRUE | TRUE | FALSE | NDD | 0 | 0 | 0 | 0 | HC-NDD        |
| EP300     | FALSE | FALSE | TRUE | TRUE | FALSE | NDD | 0 | 0 | 0 | 0 | HC-NDD        |
| EXT1      | FALSE | FALSE | TRUE | TRUE | FALSE | NDD | 0 | 0 | 0 | 0 | Candidate-NDD |
| FBXW7     | FALSE | FALSE | TRUE | TRUE | FALSE | NDD | 0 | 0 | 0 | 0 | Candidate-NDD |
| FGFR1     | FALSE | FALSE | TRUE | TRUE | FALSE | NDD | 0 | 0 | 0 | 0 | HC-NDD        |
| FGFR2     | FALSE | FALSE | TRUE | TRUE | FALSE | NDD | 0 | 0 | 0 | 0 | HC-NDD        |
| FGFR3     | FALSE | FALSE | TRUE | TRUE | FALSE | NDD | 0 | 0 | 0 | 0 | HC-NDD        |
| FOXP1     | FALSE | FALSE | TRUE | TRUE | FALSE | NDD | 0 | 0 | 0 | 0 | HC-NDD        |
| FOXP2     | FALSE | FALSE | TRUE | TRUE | FALSE | NDD | 0 | 0 | 0 | 0 | HC-NDD        |
| GABRB2    | FALSE | FALSE | TRUE | TRUE | FALSE | NDD | 0 | 0 | 0 | 0 | HC-NDD        |
| GABRG2    | FALSE | FALSE | TRUE | TRUE | FALSE | NDD | 0 | 0 | 0 | 0 | HC-NDD        |
| GATA3     | FALSE | FALSE | TRUE | TRUE | FALSE | NDD | 0 | 0 | 0 | 0 | Candidate-NDD |
| GATAD2B   | FALSE | FALSE | TRUE | TRUE | FALSE | NDD | 0 | 0 | 0 | 0 | HC-NDD        |
| GFAP      | FALSE | FALSE | TRUE | TRUE | FALSE | NDD | 0 | 0 | 0 | 0 | HC-NDD        |
| GLTSCR1   | FALSE | FALSE | TRUE | TRUE | FALSE | NDD | 0 | 0 | 0 | 0 | HC-NDD        |
| GLYR1     | FALSE | FALSE | TRUE | TRUE | FALSE | NDD | 0 | 0 | 0 | 0 | Candidate-NDD |
| GNAO1     | FALSE | FALSE | TRUE | TRUE | FALSE | NDD | 0 | 0 | 0 | 0 | HC-NDD        |
| GNAS      | FALSE | FALSE | TRUE | TRUE | FALSE | NDD | 0 | 0 | 0 | 0 | HC-NDD        |
| GNB1      | FALSE | FALSE | TRUE | TRUE | FALSE | NDD | 0 | 0 | 0 | 0 | HC-NDD        |
| GNB2      | FALSE | FALSE | TRUE | TRUE | FALSE | NDD | 0 | 0 | 0 | 0 | HC-NDD        |
| GRIN1     | FALSE | FALSE | TRUE | TRUE | FALSE | NDD | 0 | 0 | 0 | 0 | HC-NDD        |
| GRIN2A    | FALSE | FALSE | TRUE | TRUE | FALSE | NDD | 0 | 0 | 0 | 0 | HC-NDD        |
| GSK3B     | FALSE | FALSE | TRUE | TRUE | FALSE | NDD | 0 | 0 | 0 | 0 | Candidate-NDD |
| HDAC2     | FALSE | FALSE | TRUE | TRUE | FALSE | NDD | 0 | 0 | 0 | 0 | Candidate-NDD |
| HIST1H1E  | FALSE | FALSE | TRUE | TRUE | FALSE | NDD | 0 | 0 | 0 | 0 | HC-NDD        |
| HIST1H2AC | FALSE | FALSE | TRUE | TRUE | FALSE | NDD | 0 | 0 | 0 | 0 | Candidate-NDD |
| HIST1H2AE | FALSE | FALSE | TRUE | TRUE | FALSE | NDD | 0 | 0 | 0 | 0 | .             |
| HIVEP2    | FALSE | FALSE | TRUE | TRUE | FALSE | NDD | 0 | 0 | 0 | 0 | HC-NDD        |
| HK1       | FALSE | FALSE | TRUE | TRUE | FALSE | NDD | 0 | 0 | 0 | 0 | HC-NDD        |
| HNRNPK    | FALSE | FALSE | TRUE | TRUE | FALSE | NDD | 0 | 0 | 0 | 0 | HC-NDD        |
| HNRNPU    | FALSE | FALSE | TRUE | TRUE | FALSE | NDD | 0 | 0 | 0 | 0 | HC-NDD        |
| HRAS      | FALSE | FALSE | TRUE | TRUE | FALSE | NDD | 0 | 0 | 0 | 0 | HC-NDD        |
| KCNA2     | FALSE | FALSE | TRUE | TRUE | FALSE | NDD | 0 | 0 | 0 | 0 | HC-NDD        |
| KCND3     | FALSE | FALSE | TRUE | TRUE | FALSE | NDD | 0 | 0 | 0 | 0 | Candidate-NDD |
| KCNH1     | FALSE | FALSE | TRUE | TRUE | FALSE | NDD | 0 | 0 | 0 | 0 | HC-NDD        |
| KCNQ2     | FALSE | FALSE | TRUE | TRUE | FALSE | NDD | 0 | 0 | 0 | 0 | HC-NDD        |
| KCNT1     | FALSE | FALSE | TRUE | TRUE | FALSE | NDD | 0 | 0 | 0 | 0 | HC-NDD        |
| KCNT2     | FALSE | FALSE | TRUE | TRUE | FALSE | NDD | 0 | 0 | 0 | 0 | HC-NDD        |
| KIDINS220 | FALSE | FALSE | TRUE | TRUE | FALSE | NDD | 0 | 0 | 0 | 0 | HC-NDD        |
| KLF7      | FALSE | FALSE | TRUE | TRUE | FALSE | NDD | 0 | 0 | 0 | 0 | HC-NDD        |
| KLHL20    | FALSE | FALSE | TRUE | TRUE | FALSE | NDD | 0 | 0 | 0 | 0 | .             |
| KMT2B     | FALSE | FALSE | TRUE | TRUE | FALSE | NDD | 0 | 0 | 0 | 0 | HC-NDD        |
| KMT2E     | FALSE | FALSE | TRUE | TRUE | FALSE | NDD | 0 | 0 | 0 | 0 | HC-NDD        |
| KRAS      | FALSE | FALSE | TRUE | TRUE | FALSE | NDD | 0 | 0 | 0 | 0 | HC-NDD        |
| LZTR1     | FALSE | FALSE | TRUE | TRUE | FALSE | NDD | 0 | 0 | 0 | 0 | HC-NDD        |
| MAGEL2    | FALSE | FALSE | TRUE | TRUE | FALSE | NDD | 0 | 0 | 0 | 0 | HC-NDD        |
| MAP2K1    | FALSE | FALSE | TRUE | TRUE | FALSE | NDD | 0 | 0 | 0 | 0 | HC-NDD        |
| MFN2      | FALSE | FALSE | TRUE | TRUE | FALSE | NDD | 0 | 0 | 0 | 0 | Candidate-NDD |
| MN1       | FALSE | FALSE | TRUE | TRUE | FALSE | NDD | 0 | 0 | 0 | 0 | HC-NDD        |
| ODC1      | FALSE | FALSE | TRUE | TRUE | FALSE | NDD | 0 | 0 | 0 | 0 | HC-NDD        |
| OTX2      | FALSE | FALSE | TRUE | TRUE | FALSE | NDD | 0 | 0 | 0 | 0 | HC-NDD        |
| PACS2     | FALSE | FALSE | TRUE | TRUE | FALSE | NDD | 0 | 0 | 0 | 0 | HC-NDD        |
| PCBP2     | FALSE | FALSE | TRUE | TRUE | FALSE | NDD | 0 | 0 | 0 | 0 | Candidate-NDD |
| PDE4D     | FALSE | FALSE | TRUE | TRUE | FALSE | NDD | 0 | 0 | 0 | 0 | HC-NDD        |
| PHIP      | FALSE | FALSE | TRUE | TRUE | FALSE | NDD | 0 | 0 | 0 | 0 | HC-NDD        |
| PHLDB1    | FALSE | FALSE | TRUE | TRUE | FALSE | NDD | 0 | 0 | 0 | 0 | .             |
| PIK3R1    | FALSE | FALSE | TRUE | TRUE | FALSE | NDD | 0 | 0 | 0 | 0 | HC-NDD        |
| PIP5K1C   | FALSE | FALSE | TRUE | TRUE | FALSE | NDD | 0 | 0 | 0 | 0 | Candidate-NDD |
| POLR3B    | FALSE | FALSE | TRUE | TRUE | FALSE | NDD | 0 | 0 | 0 | 0 | HC-NDD        |
| POU3F3    | FALSE | FALSE | TRUE | TRUE | FALSE | NDD | 0 | 0 | 0 | 0 | HC-NDD        |
| PPP1CB    | FALSE | FALSE | TRUE | TRUE | FALSE | NDD | 0 | 0 | 0 | 0 | HC-NDD        |
| PPP2CA    | FALSE | FALSE | TRUE | TRUE | FALSE | NDD | 0 | 0 | 0 | 0 | HC-NDD        |
| PPP2R1A   | FALSE | FALSE | TRUE | TRUE | FALSE | NDD | 0 | 0 | 0 | 0 | HC-NDD        |
| PPP3CA    | FALSE | FALSE | TRUE | TRUE | FALSE | NDD | 0 | 0 | 0 | 0 | HC-NDD        |
| PRKAR1B   | FALSE | FALSE | TRUE | TRUE | FALSE | NDD | 0 | 0 | 0 | 0 | HC-NDD        |
| PSMC5     | FALSE | FALSE | TRUE | TRUE | FALSE | NDD | 0 | 0 | 0 | 0 | Candidate-NDD |
| PTPRD     | FALSE | FALSE | TRUE | TRUE | FALSE | NDD | 0 | 0 | 0 | 0 | Candidate-NDD |
| PURA      | FALSE | FALSE | TRUE | TRUE | FALSE | NDD | 0 | 0 | 0 | 0 | HC-NDD        |
| RAB14     | FALSE | FALSE | TRUE | TRUE | FALSE | NDD | 0 | 0 | 0 | 0 | Candidate-NDD |
| RAC1      | FALSE | FALSE | TRUE | TRUE | FALSE | NDD | 0 | 0 | 0 | 0 | HC-NDD        |
| RALA      | FALSE | FALSE | TRUE | TRUE | FALSE | NDD | 0 | 0 | 0 | 0 | HC-NDD        |
| RFX7      | FALSE | FALSE | TRUE | TRUE | FALSE | NDD | 0 | 0 | 0 | 0 | HC-NDD        |
| RORA      | FALSE | FALSE | TRUE | TRUE | FALSE | NDD | 0 | 0 | 0 | 0 | HC-NDD        |
| SATB1     | FALSE | FALSE | TRUE | TRUE | FALSE | NDD | 0 | 0 | 0 | 0 | HC-NDD        |
| SCN8A     | FALSE | FALSE | TRUE | TRUE | FALSE | NDD | 0 | 0 | 0 | 0 | HC-NDD        |
| SET       | FALSE | FALSE | TRUE | TRUE | FALSE | NDD | 0 | 0 | 0 | 0 | HC-NDD        |
| SETBP1    | FALSE | FALSE | TRUE | TRUE | FALSE | NDD | 0 | 0 | 0 | 0 | HC-NDD        |
| SHOC2     | FALSE | FALSE | TRUE | TRUE | FALSE | NDD | 0 | 0 | 0 | 0 | HC-NDD        |
| SMAD4     | FALSE | FALSE | TRUE | TRUE | FALSE | NDD | 0 | 0 | 0 | 0 | HC-NDD        |
| SMAD6     | FALSE | FALSE | TRUE | TRUE | FALSE | NDD | 0 | 0 | 0 | 0 | Candidate-NDD |
| SMARCB1   | FALSE | FALSE | TRUE | TRUE | FALSE | NDD | 0 | 0 | 0 | 0 | HC-NDD        |
| SMC3      | FALSE | FALSE | TRUE | TRUE | FALSE | NDD | 0 | 0 | 0 | 0 | HC-NDD        |
| SNAP25    | FALSE | FALSE | TRUE | TRUE | FALSE | NDD | 0 | 0 | 0 | 0 | HC-NDD        |
| SON       | FALSE | FALSE | TRUE | TRUE | FALSE | NDD | 0 | 0 | 0 | 0 | HC-NDD        |
| SOX10     | FALSE | FALSE | TRUE | TRUE | FALSE | NDD | 0 | 0 | 0 | 0 | HC-NDD        |
| SPOP      | FALSE | FALSE | TRUE | TRUE | FALSE | NDD | 0 | 0 | 0 | 0 | HC-NDD        |
| SPTBN1    | FALSE | FALSE | TRUE | TRUE | FALSE | NDD | 0 | 0 | 0 | 0 | HC-NDD        |
| SRCAP     | FALSE | FALSE | TRUE | TRUE | FALSE | NDD | 0 | 0 | 0 | 0 | HC-NDD        |
| SRP54     | FALSE | FALSE | TRUE | TRUE | FALSE | NDD | 0 | 0 | 0 | 0 | HC-NDD        |
| SRRM2     | FALSE | FALSE | TRUE | TRUE | FALSE | NDD | 0 | 0 | 0 | 0 | Candidate-NDD |

|           |       |       |       |      |       |     |   |   |   |   |               |
|-----------|-------|-------|-------|------|-------|-----|---|---|---|---|---------------|
| SRSF1     | FALSE | FALSE | TRUE  | TRUE | FALSE | NDD | 0 | 0 | 0 | 0 | Candidate-NDD |
| STAG1     | FALSE | FALSE | TRUE  | TRUE | FALSE | NDD | 0 | 0 | 0 | 0 | HC-NDD        |
| TCF12     | FALSE | FALSE | TRUE  | TRUE | FALSE | NDD | 0 | 0 | 0 | 0 | HC-NDD        |
| TCF3      | FALSE | FALSE | TRUE  | TRUE | FALSE | NDD | 0 | 0 | 0 | 0 | .             |
| TFAP4     | FALSE | FALSE | TRUE  | TRUE | FALSE | NDD | 0 | 0 | 0 | 0 | Candidate-NDD |
| TOP2B     | FALSE | FALSE | TRUE  | TRUE | FALSE | NDD | 0 | 0 | 0 | 0 | Candidate-NDD |
| TRIM8     | FALSE | FALSE | TRUE  | TRUE | FALSE | NDD | 0 | 0 | 0 | 0 | HC-NDD        |
| TRIO      | FALSE | FALSE | TRUE  | TRUE | FALSE | NDD | 0 | 0 | 0 | 0 | HC-NDD        |
| U2AF2     | FALSE | FALSE | TRUE  | TRUE | FALSE | NDD | 0 | 0 | 0 | 0 | Candidate-NDD |
| UBE3A     | FALSE | FALSE | TRUE  | TRUE | FALSE | NDD | 0 | 0 | 0 | 0 | HC-NDD        |
| UPF1      | FALSE | FALSE | TRUE  | TRUE | FALSE | NDD | 0 | 0 | 0 | 0 | Candidate-NDD |
| USP7      | FALSE | FALSE | TRUE  | TRUE | FALSE | NDD | 0 | 0 | 0 | 0 | HC-NDD        |
| VAMP2     | FALSE | FALSE | TRUE  | TRUE | FALSE | NDD | 0 | 0 | 0 | 0 | HC-NDD        |
| VCP       | FALSE | FALSE | TRUE  | TRUE | FALSE | NDD | 0 | 0 | 0 | 0 | Candidate-NDD |
| WHSC1     | FALSE | FALSE | TRUE  | TRUE | FALSE | NDD | 0 | 0 | 0 | 0 | HC-NDD        |
| YY1       | FALSE | FALSE | TRUE  | TRUE | FALSE | NDD | 0 | 0 | 0 | 0 | HC-NDD        |
| ZBTB18    | FALSE | FALSE | TRUE  | TRUE | FALSE | NDD | 0 | 0 | 0 | 0 | HC-NDD        |
| ZBTB7A    | FALSE | FALSE | TRUE  | TRUE | FALSE | NDD | 0 | 0 | 0 | 0 | HC-NDD        |
| ZEB2      | FALSE | FALSE | TRUE  | TRUE | FALSE | NDD | 0 | 0 | 0 | 0 | HC-NDD        |
| ZFHx3     | FALSE | FALSE | TRUE  | TRUE | FALSE | NDD | 0 | 0 | 0 | 0 | Candidate-NDD |
| ZFHx4     | FALSE | FALSE | TRUE  | TRUE | FALSE | NDD | 0 | 0 | 0 | 0 | HC-NDD        |
| ZMIZ1     | FALSE | FALSE | TRUE  | TRUE | FALSE | NDD | 0 | 0 | 0 | 0 | HC-NDD        |
| ZNF148    | FALSE | FALSE | TRUE  | TRUE | FALSE | NDD | 0 | 0 | 0 | 0 | HC-NDD        |
| ZNF865    | FALSE | FALSE | TRUE  | TRUE | FALSE | NDD | 0 | 0 | 0 | 0 | Candidate-NDD |
| ACTA2     | FALSE | FALSE | FALSE | TRUE | FALSE | NDD | 0 | 0 | 0 | 0 | .             |
| AKT3      | FALSE | FALSE | FALSE | TRUE | FALSE | NDD | 0 | 0 | 0 | 0 | HC-NDD        |
| AMH       | FALSE | FALSE | FALSE | TRUE | FALSE | NDD | 0 | 0 | 0 | 0 | .             |
| AMIGO1    | FALSE | FALSE | FALSE | TRUE | FALSE | NDD | 0 | 0 | 0 | 0 | Candidate-NDD |
| ANKRD12   | FALSE | FALSE | FALSE | TRUE | FALSE | NDD | 0 | 0 | 0 | 0 | Candidate-NDD |
| AP1G1     | FALSE | FALSE | FALSE | TRUE | FALSE | NDD | 0 | 0 | 0 | 0 | HC-NDD        |
| AP3D1     | FALSE | FALSE | FALSE | TRUE | FALSE | NDD | 0 | 0 | 0 | 0 | Candidate-NDD |
| ARCN1     | FALSE | FALSE | FALSE | TRUE | FALSE | NDD | 0 | 0 | 0 | 0 | HC-NDD        |
| ARHGAP32  | FALSE | FALSE | FALSE | TRUE | FALSE | NDD | 0 | 0 | 0 | 0 | HC-NDD        |
| ATP6V1B2  | FALSE | FALSE | FALSE | TRUE | FALSE | NDD | 0 | 0 | 0 | 0 | HC-NDD        |
| B3GNT6    | FALSE | FALSE | FALSE | TRUE | FALSE | NDD | 0 | 0 | 0 | 0 | .             |
| BCAS3     | FALSE | FALSE | FALSE | TRUE | FALSE | NDD | 0 | 0 | 0 | 0 | HC-NDD        |
| BCL9      | FALSE | FALSE | FALSE | TRUE | FALSE | NDD | 0 | 0 | 0 | 0 | .             |
| BMPR1A    | FALSE | FALSE | FALSE | TRUE | FALSE | NDD | 0 | 0 | 0 | 0 | .             |
| BOD1L1    | FALSE | FALSE | FALSE | TRUE | FALSE | NDD | 0 | 0 | 0 | 0 | Candidate-NDD |
| BPTF      | FALSE | FALSE | FALSE | TRUE | FALSE | NDD | 0 | 0 | 0 | 0 | HC-NDD        |
| BTBD10    | FALSE | FALSE | FALSE | TRUE | FALSE | NDD | 0 | 0 | 0 | 0 | .             |
| CACNA2D1  | FALSE | FALSE | FALSE | TRUE | FALSE | NDD | 0 | 0 | 0 | 0 | Candidate-NDD |
| CALM1     | FALSE | FALSE | FALSE | TRUE | FALSE | NDD | 0 | 0 | 0 | 0 | Candidate-NDD |
| CAMK2D    | FALSE | FALSE | FALSE | TRUE | FALSE | NDD | 0 | 0 | 0 | 0 | .             |
| CAMK4     | FALSE | FALSE | FALSE | TRUE | FALSE | NDD | 0 | 0 | 0 | 0 | HC-NDD        |
| CBL       | FALSE | FALSE | FALSE | TRUE | FALSE | NDD | 0 | 0 | 0 | 0 | HC-NDD        |
| CBLL1     | FALSE | FALSE | FALSE | TRUE | FALSE | NDD | 0 | 0 | 0 | 0 | Candidate-NDD |
| CBX3      | FALSE | FALSE | FALSE | TRUE | FALSE | NDD | 0 | 0 | 0 | 0 | Candidate-NDD |
| CDKN1C    | FALSE | FALSE | FALSE | TRUE | FALSE | NDD | 0 | 0 | 0 | 0 | Candidate-NDD |
| CDKN2AIP  | FALSE | FALSE | FALSE | TRUE | FALSE | NDD | 0 | 0 | 0 | 0 | Candidate-NDD |
| CENPE     | FALSE | FALSE | FALSE | TRUE | FALSE | NDD | 0 | 0 | 0 | 0 | HC-NDD        |
| CENPV     | FALSE | FALSE | FALSE | TRUE | FALSE | NDD | 0 | 0 | 0 | 0 | .             |
| CHD5      | FALSE | FALSE | FALSE | TRUE | FALSE | NDD | 0 | 0 | 0 | 0 | HC-NDD        |
| CHMP7     | FALSE | FALSE | FALSE | TRUE | FALSE | NDD | 0 | 0 | 0 | 0 | .             |
| CNOT2     | FALSE | FALSE | FALSE | TRUE | FALSE | NDD | 0 | 0 | 0 | 0 | Candidate-NDD |
| CPSF6     | FALSE | FALSE | FALSE | TRUE | FALSE | NDD | 0 | 0 | 0 | 0 | Candidate-NDD |
| CRIM1     | FALSE | FALSE | FALSE | TRUE | FALSE | NDD | 0 | 0 | 0 | 0 | Candidate-NDD |
| DAZAP1    | FALSE | FALSE | FALSE | TRUE | FALSE | NDD | 0 | 0 | 0 | 0 | Candidate-NDD |
| DCAF7     | FALSE | FALSE | FALSE | TRUE | FALSE | NDD | 0 | 0 | 0 | 0 | Candidate-NDD |
| DCTN2     | FALSE | FALSE | FALSE | TRUE | FALSE | NDD | 0 | 0 | 0 | 0 | Candidate-NDD |
| DDX6      | FALSE | FALSE | FALSE | TRUE | FALSE | NDD | 0 | 0 | 0 | 0 | HC-NDD        |
| DLK2      | FALSE | FALSE | FALSE | TRUE | FALSE | NDD | 0 | 0 | 0 | 0 | .             |
| DOPEY1    | FALSE | FALSE | FALSE | TRUE | FALSE | NDD | 0 | 0 | 0 | 0 | Candidate-NDD |
| DOT1L     | FALSE | FALSE | FALSE | TRUE | FALSE | NDD | 0 | 0 | 0 | 0 | Candidate-NDD |
| DPYSL5    | FALSE | FALSE | FALSE | TRUE | FALSE | NDD | 0 | 0 | 0 | 0 | HC-NDD        |
| DRD2      | FALSE | FALSE | FALSE | TRUE | FALSE | NDD | 0 | 0 | 0 | 0 | Candidate-NDD |
| DUS1L     | FALSE | FALSE | FALSE | TRUE | FALSE | NDD | 0 | 0 | 0 | 0 | .             |
| DUSP16    | FALSE | FALSE | FALSE | TRUE | FALSE | NDD | 0 | 0 | 0 | 0 | .             |
| EIF3B     | FALSE | FALSE | FALSE | TRUE | FALSE | NDD | 0 | 0 | 0 | 0 | Candidate-NDD |
| EIF3G     | FALSE | FALSE | FALSE | TRUE | FALSE | NDD | 0 | 0 | 0 | 0 | HC-NDD        |
| ELAVL4    | FALSE | FALSE | FALSE | TRUE | FALSE | NDD | 0 | 0 | 0 | 0 | Candidate-NDD |
| EML6      | FALSE | FALSE | FALSE | TRUE | FALSE | NDD | 0 | 0 | 0 | 0 | .             |
| ESRRG     | FALSE | FALSE | FALSE | TRUE | FALSE | NDD | 0 | 0 | 0 | 0 | .             |
| ETF1      | FALSE | FALSE | FALSE | TRUE | FALSE | NDD | 0 | 0 | 0 | 0 | Candidate-NDD |
| EZH2      | FALSE | FALSE | FALSE | TRUE | FALSE | NDD | 0 | 0 | 0 | 0 | HC-NDD        |
| FBXO28    | FALSE | FALSE | FALSE | TRUE | FALSE | NDD | 0 | 0 | 0 | 0 | HC-NDD        |
| FEZF2     | FALSE | FALSE | FALSE | TRUE | FALSE | NDD | 0 | 0 | 0 | 0 | Candidate-NDD |
| FGF12     | FALSE | FALSE | FALSE | TRUE | FALSE | NDD | 0 | 0 | 0 | 0 | HC-NDD        |
| FOSL2     | FALSE | FALSE | FALSE | TRUE | FALSE | NDD | 0 | 0 | 0 | 0 | Candidate-NDD |
| FUS       | FALSE | FALSE | FALSE | TRUE | FALSE | NDD | 0 | 0 | 0 | 0 | Candidate-NDD |
| G3BP2     | FALSE | FALSE | FALSE | TRUE | FALSE | NDD | 0 | 0 | 0 | 0 | Candidate-NDD |
| GABBR1    | FALSE | FALSE | FALSE | TRUE | FALSE | NDD | 0 | 0 | 0 | 0 | Candidate-NDD |
| GAK       | FALSE | FALSE | FALSE | TRUE | FALSE | NDD | 0 | 0 | 0 | 0 | Candidate-NDD |
| GGNBP2    | FALSE | FALSE | FALSE | TRUE | FALSE | NDD | 0 | 0 | 0 | 0 | Candidate-NDD |
| GOLGA4    | FALSE | FALSE | FALSE | TRUE | FALSE | NDD | 0 | 0 | 0 | 0 | .             |
| GPR4      | FALSE | FALSE | FALSE | TRUE | FALSE | NDD | 0 | 0 | 0 | 0 | .             |
| GRIK2     | FALSE | FALSE | FALSE | TRUE | FALSE | NDD | 0 | 0 | 0 | 0 | HC-NDD        |
| GRN       | FALSE | FALSE | FALSE | TRUE | FALSE | NDD | 0 | 0 | 0 | 0 | Candidate-NDD |
| HCN1      | FALSE | FALSE | FALSE | TRUE | FALSE | NDD | 0 | 0 | 0 | 0 | HC-NDD        |
| HNRNPA2B1 | FALSE | FALSE | FALSE | TRUE | FALSE | NDD | 0 | 0 | 0 | 0 | Candidate-NDD |
| HSP90AB1  | FALSE | FALSE | FALSE | TRUE | FALSE | NDD | 0 | 0 | 0 | 0 | Candidate-NDD |
| INF2      | FALSE | FALSE | FALSE | TRUE | FALSE | NDD | 0 | 0 | 0 | 0 | Candidate-NDD |
| KAT5      | FALSE | FALSE | FALSE | TRUE | FALSE | NDD | 0 | 0 | 0 | 0 | HC-NDD        |
| KAT8      | FALSE | FALSE | FALSE | TRUE | FALSE | NDD | 0 | 0 | 0 | 0 | HC-NDD        |
| KCNA1     | FALSE | FALSE | FALSE | TRUE | FALSE | NDD | 0 | 0 | 0 | 0 | HC-NDD        |
| KCNC1     | FALSE | FALSE | FALSE | TRUE | FALSE | NDD | 0 | 0 | 0 | 0 | HC-NDD        |
| KCNJ6     | FALSE | FALSE | FALSE | TRUE | FALSE | NDD | 0 | 0 | 0 | 0 | HC-NDD        |
| KIAA1551  | FALSE | FALSE | FALSE | TRUE | FALSE | NDD | 0 | 0 | 0 | 0 | .             |
| KIF5B     | FALSE | FALSE | FALSE | TRUE | FALSE | NDD | 0 | 0 | 0 | 0 | Candidate-NDD |
| KLHDC3    | FALSE | FALSE | FALSE | TRUE | FALSE | NDD | 0 | 0 | 0 | 0 | Candidate-NDD |
| KLHL6     | FALSE | FALSE | FALSE | TRUE | FALSE | NDD | 0 | 0 | 0 | 0 | .             |



|           |       |       |       |      |       |     |   |   |   |   |               |
|-----------|-------|-------|-------|------|-------|-----|---|---|---|---|---------------|
| LASP1     | FALSE | FALSE | FALSE | TRUE | FALSE | NDD | 0 | 0 | 0 | 0 | Candidate-NDD |
| LEF1      | FALSE | FALSE | FALSE | TRUE | FALSE | NDD | 0 | 0 | 0 | 0 | Candidate-NDD |
| LEO1      | FALSE | FALSE | FALSE | TRUE | FALSE | NDD | 0 | 0 | 0 | 0 | HC-NDD        |
| LHX2      | FALSE | FALSE | FALSE | TRUE | FALSE | NDD | 0 | 0 | 0 | 0 | Candidate-NDD |
| LMNB1     | FALSE | FALSE | FALSE | TRUE | FALSE | NDD | 0 | 0 | 0 | 0 | HC-NDD        |
| LRRC4     | FALSE | FALSE | FALSE | TRUE | FALSE | NDD | 0 | 0 | 0 | 0 | Candidate-NDD |
| MAEA      | FALSE | FALSE | FALSE | TRUE | FALSE | NDD | 0 | 0 | 0 | 0 | .             |
| MAFB      | FALSE | FALSE | FALSE | TRUE | FALSE | NDD | 0 | 0 | 0 | 0 | Candidate-NDD |
| MAP2      | FALSE | FALSE | FALSE | TRUE | FALSE | NDD | 0 | 0 | 0 | 0 | Candidate-NDD |
| MAP4K4    | FALSE | FALSE | FALSE | TRUE | FALSE | NDD | 0 | 0 | 0 | 0 | Candidate-NDD |
| MAX       | FALSE | FALSE | FALSE | TRUE | FALSE | NDD | 0 | 0 | 0 | 0 | .             |
| MCOLN1    | FALSE | FALSE | FALSE | TRUE | FALSE | NDD | 0 | 0 | 0 | 0 | HC-NDD        |
| METTL2A   | FALSE | FALSE | FALSE | TRUE | FALSE | NDD | 0 | 0 | 0 | 0 | .             |
| MIP       | FALSE | FALSE | FALSE | TRUE | FALSE | NDD | 0 | 0 | 0 | 0 | .             |
| MKL1      | FALSE | FALSE | FALSE | TRUE | FALSE | NDD | 0 | 0 | 0 | 0 | Candidate-NDD |
| MYRF      | FALSE | FALSE | FALSE | TRUE | FALSE | NDD | 0 | 0 | 0 | 0 | Candidate-NDD |
| NACA      | FALSE | FALSE | FALSE | TRUE | FALSE | NDD | 0 | 0 | 0 | 0 | Candidate-NDD |
| NAMPT     | FALSE | FALSE | FALSE | TRUE | FALSE | NDD | 0 | 0 | 0 | 0 | Candidate-NDD |
| NARS      | FALSE | FALSE | FALSE | TRUE | FALSE | NDD | 0 | 0 | 0 | 0 | HC-NDD        |
| NCL       | FALSE | FALSE | FALSE | TRUE | FALSE | NDD | 0 | 0 | 0 | 0 | Candidate-NDD |
| NEDD8     | FALSE | FALSE | FALSE | TRUE | FALSE | NDD | 0 | 0 | 0 | 0 | Candidate-NDD |
| NEO1      | FALSE | FALSE | FALSE | TRUE | FALSE | NDD | 0 | 0 | 0 | 0 | Candidate-NDD |
| NKX2-1    | FALSE | FALSE | FALSE | TRUE | FALSE | NDD | 0 | 0 | 0 | 0 | HC-NDD        |
| NOTCH2    | FALSE | FALSE | FALSE | TRUE | FALSE | NDD | 0 | 0 | 0 | 0 | Candidate-NDD |
| NPTN      | FALSE | FALSE | FALSE | TRUE | FALSE | NDD | 0 | 0 | 0 | 0 | Candidate-NDD |
| NR3C2     | FALSE | FALSE | FALSE | TRUE | FALSE | NDD | 0 | 0 | 0 | 0 | HC-NDD        |
| OTUD7A    | FALSE | FALSE | FALSE | TRUE | FALSE | NDD | 0 | 0 | 0 | 0 | Candidate-NDD |
| PAPOLA    | FALSE | FALSE | FALSE | TRUE | FALSE | NDD | 0 | 0 | 0 | 0 | Candidate-NDD |
| PBX3      | FALSE | FALSE | FALSE | TRUE | FALSE | NDD | 0 | 0 | 0 | 0 | .             |
| PCSK2     | FALSE | FALSE | FALSE | TRUE | FALSE | NDD | 0 | 0 | 0 | 0 | Candidate-NDD |
| PISD      | FALSE | FALSE | FALSE | TRUE | FALSE | NDD | 0 | 0 | 0 | 0 | HC-NDD        |
| PLXNA2    | FALSE | FALSE | FALSE | TRUE | FALSE | NDD | 0 | 0 | 0 | 0 | Candidate-NDD |
| PPARG     | FALSE | FALSE | FALSE | TRUE | FALSE | NDD | 0 | 0 | 0 | 0 | .             |
| PPFIA2    | FALSE | FALSE | FALSE | TRUE | FALSE | NDD | 0 | 0 | 0 | 0 | Candidate-NDD |
| PRKAR1A   | FALSE | FALSE | FALSE | TRUE | FALSE | NDD | 0 | 0 | 0 | 0 | Candidate-NDD |
| PRKCE     | FALSE | FALSE | FALSE | TRUE | FALSE | NDD | 0 | 0 | 0 | 0 | Candidate-NDD |
| PRKD1     | FALSE | FALSE | FALSE | TRUE | FALSE | NDD | 0 | 0 | 0 | 0 | HC-NDD        |
| PRKG1     | FALSE | FALSE | FALSE | TRUE | FALSE | NDD | 0 | 0 | 0 | 0 | Candidate-NDD |
| PROC      | FALSE | FALSE | FALSE | TRUE | FALSE | NDD | 0 | 0 | 0 | 0 | .             |
| PSMA3     | FALSE | FALSE | FALSE | TRUE | FALSE | NDD | 0 | 0 | 0 | 0 | Candidate-NDD |
| RAB11A    | FALSE | FALSE | FALSE | TRUE | FALSE | NDD | 0 | 0 | 0 | 0 | HC-NDD        |
| RAB43     | FALSE | FALSE | FALSE | TRUE | FALSE | NDD | 0 | 0 | 0 | 0 | Candidate-NDD |
| RAF1      | FALSE | FALSE | FALSE | TRUE | FALSE | NDD | 0 | 0 | 0 | 0 | HC-NDD        |
| RAP1B     | FALSE | FALSE | FALSE | TRUE | FALSE | NDD | 0 | 0 | 0 | 0 | Candidate-NDD |
| RARA      | FALSE | FALSE | FALSE | TRUE | FALSE | NDD | 0 | 0 | 0 | 0 | Candidate-NDD |
| RARB      | FALSE | FALSE | FALSE | TRUE | FALSE | NDD | 0 | 0 | 0 | 0 | HC-NDD        |
| RBM12     | FALSE | FALSE | FALSE | TRUE | FALSE | NDD | 0 | 0 | 0 | 0 | .             |
| RMND5A    | FALSE | FALSE | FALSE | TRUE | FALSE | NDD | 0 | 0 | 0 | 0 | .             |
| RPL10A    | FALSE | FALSE | FALSE | TRUE | FALSE | NDD | 0 | 0 | 0 | 0 | Candidate-NDD |
| RPL19     | FALSE | FALSE | FALSE | TRUE | FALSE | NDD | 0 | 0 | 0 | 0 | Candidate-NDD |
| RTN4RL2   | FALSE | FALSE | FALSE | TRUE | FALSE | NDD | 0 | 0 | 0 | 0 | .             |
| RUSC1     | FALSE | FALSE | FALSE | TRUE | FALSE | NDD | 0 | 0 | 0 | 0 | Candidate-NDD |
| SCAF4     | FALSE | FALSE | FALSE | TRUE | FALSE | NDD | 0 | 0 | 0 | 0 | HC-NDD        |
| SCN4A     | FALSE | FALSE | FALSE | TRUE | FALSE | NDD | 0 | 0 | 0 | 0 | Candidate-NDD |
| SEC16A    | FALSE | FALSE | FALSE | TRUE | FALSE | NDD | 0 | 0 | 0 | 0 | Candidate-NDD |
| SF3B1     | FALSE | FALSE | FALSE | TRUE | FALSE | NDD | 0 | 0 | 0 | 0 | Candidate-NDD |
| SF3B4     | FALSE | FALSE | FALSE | TRUE | FALSE | NDD | 0 | 0 | 0 | 0 | Candidate-NDD |
| SLC15A3   | FALSE | FALSE | FALSE | TRUE | FALSE | NDD | 0 | 0 | 0 | 0 | .             |
| SLC39A8   | FALSE | FALSE | FALSE | TRUE | FALSE | NDD | 0 | 0 | 0 | 0 | HC-NDD        |
| SLC4A4    | FALSE | FALSE | FALSE | TRUE | FALSE | NDD | 0 | 0 | 0 | 0 | HC-NDD        |
| SOGA1     | FALSE | FALSE | FALSE | TRUE | FALSE | NDD | 0 | 0 | 0 | 0 | Candidate-NDD |
| SOX6      | FALSE | FALSE | FALSE | TRUE | FALSE | NDD | 0 | 0 | 0 | 0 | HC-NDD        |
| SPI1      | FALSE | FALSE | FALSE | TRUE | FALSE | NDD | 0 | 0 | 0 | 0 | Candidate-NDD |
| SPTBN2    | FALSE | FALSE | FALSE | TRUE | FALSE | NDD | 0 | 0 | 0 | 0 | HC-NDD        |
| SRRM3     | FALSE | FALSE | FALSE | TRUE | FALSE | NDD | 0 | 0 | 0 | 0 | .             |
| SRSF7     | FALSE | FALSE | FALSE | TRUE | FALSE | NDD | 0 | 0 | 0 | 0 | Candidate-NDD |
| SUPT16H   | FALSE | FALSE | FALSE | TRUE | FALSE | NDD | 0 | 0 | 0 | 0 | HC-NDD        |
| SVEP1     | FALSE | FALSE | FALSE | TRUE | FALSE | NDD | 0 | 0 | 0 | 0 | Candidate-NDD |
| TFAP2B    | FALSE | FALSE | FALSE | TRUE | FALSE | NDD | 0 | 0 | 0 | 0 | Candidate-NDD |
| TMEM63B   | FALSE | FALSE | FALSE | TRUE | FALSE | NDD | 0 | 0 | 0 | 0 | Candidate-NDD |
| TNFRSF11A | FALSE | FALSE | FALSE | TRUE | FALSE | NDD | 0 | 0 | 0 | 0 | .             |
| TNFRSF21  | FALSE | FALSE | FALSE | TRUE | FALSE | NDD | 0 | 0 | 0 | 0 | Candidate-NDD |
| TNNC2     | FALSE | FALSE | FALSE | TRUE | FALSE | NDD | 0 | 0 | 0 | 0 | .             |
| TSC2      | FALSE | FALSE | FALSE | TRUE | FALSE | NDD | 0 | 0 | 0 | 0 | HC-NDD        |
| UBA2      | FALSE | FALSE | FALSE | TRUE | FALSE | NDD | 0 | 0 | 0 | 0 | HC-NDD        |
| USP46     | FALSE | FALSE | FALSE | TRUE | FALSE | NDD | 0 | 0 | 0 | 0 | Candidate-NDD |
| VPS4A     | FALSE | FALSE | FALSE | TRUE | FALSE | NDD | 0 | 0 | 0 | 0 | HC-NDD        |
| WAPAL     | FALSE | FALSE | FALSE | TRUE | FALSE | NDD | 0 | 0 | 0 | 0 | Candidate-NDD |
| WDR37     | FALSE | FALSE | FALSE | TRUE | FALSE | NDD | 0 | 0 | 0 | 0 | HC-NDD        |
| ZBTB1     | FALSE | FALSE | FALSE | TRUE | FALSE | NDD | 0 | 0 | 0 | 0 | Candidate-NDD |
| ZDBF2     | FALSE | FALSE | FALSE | TRUE | FALSE | NDD | 0 | 0 | 0 | 0 | .             |
| ZDHHCS    | FALSE | FALSE | FALSE | TRUE | FALSE | NDD | 0 | 0 | 0 | 0 | Candidate-NDD |
| ZNF423    | FALSE | FALSE | FALSE | TRUE | FALSE | NDD | 0 | 0 | 0 | 0 | Candidate-NDD |
| ZNF644    | FALSE | FALSE | FALSE | TRUE | FALSE | NDD | 0 | 0 | 0 | 0 | Candidate-NDD |

Supplementary Table 9: Comorbidities of probands with pdSNVs in the list of 684 high-confidence ASD/NDD genes

a) Rare pdSNVs

|                  | Rare <i>de novo</i> pdSNVs in 684 ASD/NDD genes    |                                                        |      |                             | Rare severe pdSNVs ( <i>de novo</i> /inherited) in 684 ASD/NDD genes |                                               |      |                             |
|------------------|----------------------------------------------------|--------------------------------------------------------|------|-----------------------------|----------------------------------------------------------------------|-----------------------------------------------|------|-----------------------------|
|                  | Probands with <i>de novo</i> pdSNVs<br>n =16 (11%) | Probands without <i>de novo</i> pdSNVs<br>n =128 (89%) | OR   | Fisher's Exact test p-value | Probands with severe pdSNVs<br>n =49 (34%)                           | Probands without severe pdSNVs<br>n =95 (66%) | OR   | Fisher's Exact test p-value |
| <b>Females</b>   | 4 (25%)                                            | 30 (23%)                                               |      |                             | 12 (24%)                                                             | 22 (23%)                                      |      |                             |
| <b>SPX</b>       | 9 (56%)                                            | 80 (63%)                                               |      |                             | 33 (67%)                                                             | 56 (59%)                                      |      |                             |
| <b>Severe ID</b> | 5 (31%)                                            | 11 (9%)                                                | 4.83 | 0.018                       | 10 (20%)                                                             | 6 (6%)                                        | 3.80 | 0.022                       |

b) Novel pdSNVs

|                  | Novel <i>de novo</i> pdSNVs in 684 ASD/NDD genes   |                                                        |      |                             | Novel severe pdSNVs ( <i>de novo</i> /inherited) in 684 ASD/NDD genes |                                               |      |                             |
|------------------|----------------------------------------------------|--------------------------------------------------------|------|-----------------------------|-----------------------------------------------------------------------|-----------------------------------------------|------|-----------------------------|
|                  | Probands with <i>de novo</i> pdSNVs<br>n =15 (10%) | Probands without <i>de novo</i> pdSNVs<br>n =129 (90%) | OR   | Fisher's Exact test p-value | Probands with severe pdSNVs<br>n=43 (30%)                             | Probands without severe pdSNVs<br>n=101 (70%) | OR   | Fisher's Exact test p-value |
| <b>Females</b>   | 4 (27%)                                            | 30 (23%)                                               |      |                             | 12 (28%)                                                              | 22 (22%)                                      |      |                             |
| <b>SPX</b>       | 9 (60%)                                            | 80 (62%)                                               |      |                             | 28 (65%)                                                              | 61 (60%)                                      |      |                             |
| <b>Severe ID</b> | 5 (33%)                                            | 11 (9%)                                                | 5.36 | 0.014                       | 9 (21%)                                                               | 7 (7%)                                        | 3.55 | 0.021                       |

*De novo* pdSNVs include high confidence PTVs in genes with LOEUF <0.6 ( $PTV_{LOEUF}$ ), missense variants with MPC score  $\geq 2$  (DmisB) and missense variants with MPC score 1-2 (DmisA). Severe pdSNVs include high confidence PTVs in genes with LOEUF <0.6 ( $PTV_{LOEUF}$ ) and missense variants with MPC score  $\geq 2$  (DmisB) likely pathogenic for AlphaMissense ( $LP_{\alpha M}$ ). Severe ID: non verbal IQ<35

Supplementary Table 10: Rare genic CNVs in affected individuals and SLD siblings

| CytoBand     | Coordinates (hg38)       | Length (bp) | CNV type | Available CNV data | Detected from SNP/GS data | Family | Proband | Segregation <sup>1</sup> | Inheritance    | Genes (hg38.ncbiRefSeqCurated)            | NDD genes (GeneTrek v2) <sup>2</sup> | pdCNVs (Table2) |
|--------------|--------------------------|-------------|----------|--------------------|---------------------------|--------|---------|--------------------------|----------------|-------------------------------------------|--------------------------------------|-----------------|
| 1p36.32      | chr1:3445692-3499148     | 53457       | LOSS     | SNP                | SNP                       | Fam41  | 41.3    | 41: f/m/aM/uM            | paternal       | ARHGEF16,MEGF6                            | .                                    | no              |
| 1p36.23      | chr1:8917389-8978674     | 61286       | GAIN     | SNP/GS             | SNP/GS                    | Fam10  | 10.3    | 10: f/m/aM/uF            | maternal       | CA6                                       | CA6(cand)                            | no              |
| 1p36.13      | chr1:18606250-19018007   | 411758      | LOSS     | SNP                | SNP                       | Fam91  | 91.3    | 91: m/aM/dM/aM/dM        | father N/A     | ALDH4A1,IFFO2,MIR1290,MIR4695,PAX7,TAS1R2 | ALDH4A1(HC),PAX7(cand)               | yes             |
| 1p33         | chr1:49251101-49466595   | 215495      | LOSS     | SNP/GS             | SNP/GS                    | Fam78  | 78.3    | 78: f/m/aF/uM            | paternal       | AGBL4,AGBL4-AS1,AGBL4-IT1                 | AGBL4(cand)                          | no              |
| 1p33         | chr1:49447941-49533260   | 85320       | LOSS     | SNP/GS             | GS                        | Fam44  | 44.3    | 44: f/m/aM/uF            | paternal       | AGBL4,AGBL4-IT1                           | AGBL4(cand)                          | no              |
| 1p32.3       | chr1:54657064-54667169   | 10106       | LOSS     | SNP/GS             | GS                        | Fam48  | 48.3    | 48: f/m/aM/uM            | maternal       | MROH7-TTC4,MROH7                          | .                                    | no              |
| 1p31.3       | chr1:65126632-65158378   | 31747       | GAIN     | SNP/GS             | GS                        | Fam107 | 107.3   | 107: f/m/aM              | paternal       | AK4                                       | .                                    | no              |
| 1p31.1       | chr1:71519763-71888101   | 368339      | LOSS     | SNP/GS             | SNP/GS                    | Fam108 | 108.3   | 108: f/m/aM              | maternal       | NEGR1,NEGR1-IT1                           | NEGR1(cand)                          | yes             |
| 1p21.1-p21.2 | chr1:101559386-101806218 | 246833      | GAIN     | SNP                | SNP                       | Fam115 | 115.4   | 115: f/m/aF/aM/aF        | paternal       | LINC01709,OLFM3                           | .                                    | no              |
| 1p21.1       | chr1:101825699-101875521 | 49823       | LOSS     | SNP/GS             | SNP/GS                    | Fam75  | 75.3    | 75: f/m/aM               | paternal       | DNAJA1P5,OLFM3                            | .                                    | no              |
| 1q24.1       | chr1:167038425-167074452 | 36028       | LOSS     | SNP/GS             | SNP/GS                    | Fam92  | 92.3    | 92: f/m/aM/raM           | maternal       | GPA33                                     | .                                    | no              |
| 1q24.2       | chr1:170622490-170688738 | 66249       | GAIN     | SNP/GS             | SNP/GS                    | Fam94  | 94.3    | 94: f/m/aM               | maternal       | PRRX1                                     | PRRX1(cand)                          | no              |
| 1q32.1       | chr1:200044020-200054031 | 10012       | GAIN     | SNP/GS             | GS                        | Fam34  | 34.3    | 34: f/m/aM/uF            | maternal       | NR5A2                                     | .                                    | no              |
| 1q41         | chr1:219913924-219941648 | 27725       | GAIN     | SNP/GS             | SNP/GS                    | Fam12  | 12.3    | 12: f/m/aM/uM/aM         | paternal       | SLC30A10                                  | SLC30A10(cand)                       | no              |
| 1q42.13      | chr1:230095012-230188321 | 93310       | GAIN     | SNP                | SNP                       | Fam2   | 2.3     | 2: f/m/aF                | maternal       | GALNT2                                    | GALNT2(HC)                           | yes             |
| 1q43         | chr1:239719407-240184673 | 465267      | GAIN     | SNP/GS             | SNP/GS                    | Fam95  | 95.3    | 95: f/m/aM/aM/uF         | maternal       | CHRM3,FMN2,RPS7P5,CHRM3-AS1               | CHRM3(cand),FMN2(HC)                 | no              |
| 1q44         | chr1:245334797-245424055 | 89259       | LOSS     | SNP/GS             | SNP/GS                    | Fam71  | 71.3    | 71: f/m/aF               | maternal       | KIF26B                                    | KIF26B(cand)                         | yes             |
| 1q44         | chr1:246965773-246989584 | 23812       | LOSS     | SNP/GS             | SNP/GS                    | Fam51  | 51.3    | 51: f/m/aM/uF            | paternal       | ZNF670-ZNF695,ZNF695                      | .                                    | no              |
| 2p25.3       | chr2:196082-261610       | 65529       | LOSS     | SNP/GS             | SNP/GS                    | Fam100 | 100.3   | 100: f/m/aF              | paternal       | SH3YL1                                    | SH3YL1(cand)                         | yes             |
| 2p25.3       | chr2:1736572-1846326     | 109755      | GAIN     | SNP/GS             | GS                        | Fam84  | 84.3    | 84: f/m/aF               | maternal       | MYT1L,PXDN                                | MYT1L(HC),PXDN(cand)                 | yes             |
| 2p25.2       | chr2:6833046-6845996     | 12951       | LOSS     | SNP/GS             | GS                        | Fam113 | 113.4   | 113: f/m/aF/raM/uF       | N/A            | CMPK2,NRIR                                | CMPK2(cand)                          | yes             |
| 2p23.3       | chr2:24969272-25033256   | 63985       | GAIN     | SNP/GS             | GS                        | Fam17  | 17.3    | 17: f/m/aM/uM            | paternal       | DNAJC27-AS1,DNAJC27                       | .                                    | no              |
| 2p21         | chr2:44279660-44297873   | 18214       | LOSS     | SNP/GS             | SNP/GS                    | Fam52  | 52.3    | 52: f/m/aM               | paternal       | SLC3A1                                    | .                                    | no              |
| 2p16.3       | chr2:49962600-50756048   | 793449      | LOSS     | SNP                | SNP                       | Fam2   | 2.3     | 2: f/m/aF                | maternal       | NRXN1,MIR8485                             | NRXN1(HC)                            | yes             |
| 2p16.2       | chr2:54193480-54356405   | 162926      | LOSS     | SNP                | SNP                       | Fam120 | 120.4   | 120: f/m/aM/aM           | <b>de novo</b> | <b>ACYP2,C2orf73,TSPYL6</b>               | <b>ACYP2(cand)</b>                   | yes             |
| 2p13.2       | chr2:73156352-73212468   | 56117       | GAIN     | SNP/GS             | SNP/GS                    | Fam51  | 51.3    | 51: f/m/aM/uF            | maternal       | NOTO                                      | .                                    | no              |
| 2p11.2       | chr2:85382432-85420460   | 38029       | LOSS     | SNP/GS             | SNP/GS                    | Fam113 | 113.3   | 113: f/m/aF/raM/uF       | paternal       | CAPG,ELMOD3,SH2D6                         | CAPG(cand)                           | no              |
| 2q13         | chr2:110095476-110227154 | 131679      | GAIN     | SNP/GS             | SNP/GS                    | Fam108 | 108.3   | 108: f/m/aM              | maternal       | MALL,MTLN,NPHP1                           | NPHP1(HC)                            | no              |
| 2q14.2       | chr2:121327822-121451859 | 124038      | GAIN     | SNP/GS             | GS                        | Fam101 | 101.3   | 101: f/m/aM              | paternal       | CLASP1                                    | CLASP1(cand)                         | no              |
| 2q21.2       | chr2:133265993-133292049 | 26057       | LOSS     | SNP/GS             | GS                        | Fam7   | 7.4     | 7: f/m/aM/aM/uM          | maternal       | NCKAP5,NCKAP5-AS2                         | NCKAP5(cand)                         | no              |
| 2q37.2       | chr2:236200550-236222477 | 21928       | LOSS     | SNP/GS             | GS                        | Fam50  | 50.3    | 50: f/m/aF               | paternal       | ASB18                                     | .                                    | no              |
| 2q37.3       | chr2:239926522-239970550 | 44029       | GAIN     | SNP/GS             | GS                        | Fam107 | 107.3   | 107: f/m/aM              | paternal       | MIR4786,NDUFA10                           | NDUFA10(cand)                        | no              |
| 2q37.3       | chr2:240684490-240770186 | 85697       | GAIN     | SNP/GS             | GS                        | Fam51  | 51.3    | 51: f/m/aM/uF            | maternal       | AQP12A,KIF1A,LOC285191                    | KIF1A(HC)                            | no              |
| 2q37.3       | chr2:240685836-240770462 | 84627       | GAIN     | SNP/GS             | SNP/GS                    | Fam92  | 92.3    | 92: f/m/aM/raM           | maternal       | AQP12A,KIF1A,LOC285191                    | KIF1A(HC)                            | no              |
| 3p26.3       | chr3:241763-276520       | 34758       | LOSS     | SNP/GS             | SNP/GS                    | Fam9   | 9.4     | 9: f/m/aM/dM/uF          | maternal       | CHL1                                      | CHL1(cand)                           | no              |
| 3p24.2       | chr3:24849648-24866624   | 16977       | LOSS     | SNP/GS             | GS                        | Fam29  | 29.3    | 29: f/m/aF/uM            | paternal       | RARB                                      | RARB(HC)                             | no              |
| 3p22.1       | chr3:40374287-40407387   | 33101       | LOSS     | SNP/GS             | GS                        | Fam77  | 77.3    | 77: f/m/aM/aF/uM/uFs     | maternal       | ENTPD3,ENTPD3-AS1                         | ENTPD3(cand)                         | no              |
| 3q13.13      | chr3:111537794-111552977 | 15184       | LOSS     | SNP/GS             | SNP/GS                    | Fam56  | 56.3    | 56: f/m/aF/aM            | maternal       | CD96                                      | CD96(cand)                           | no              |
| 3q13.32      | chr3:119008223-119053775 | 45553       | GAIN     | SNP/GS             | SNP/GS                    | Fam99  | 99.4    | 99: f/m/aM/aM            | maternal       | IGSF11                                    | .                                    | no              |
| 4p16.3       | chr4:2984670-2996333     | 11664       | LOSS     | SNP/GS             | SNP/GS                    | Fam14  | 14.3    | 14: f/m/aM/aM            | maternal       | GRK4                                      | .                                    | no              |
| 4p15.2       | chr4:26884744-27056163   | 171420      | GAIN     | SNP/GS             | SNP/GS                    | Fam82  | 82.3    | 82: f/m/aM/uF            | paternal       | STIM2                                     | STIM2(cand)                          | no              |
| 4q28.2       | chr4:128851635-129010147 | 158513      | GAIN     | SNP/GS             | SNP/GS                    | Fam85  | 85.3    | 85: f/m/aM/aM            | maternal       | JADE1,SCLT1                               | JADE1(cand)                          | no              |
| 4q28.2       | chr4:128852273-129006649 | 154377      | GAIN     | SNP                | SNP                       | Fam8   | 8.3     | 8: f/m/aM/uF             | paternal       | JADE1,SCLT1                               | JADE1(cand)                          | no              |
| 4q31.3       | chr4:150267053-150327676 | 60624       | GAIN     | SNP/GS             | SNP/GS                    | Fam11  | 11.3    | 11: f/m/aM/uM            | maternal       | LRBA                                      | LRBA(cand)                           | yes             |
| 4q32.3       | chr4:168622846-168679424 | 56579       | LOSS     | SNP/GS             | SNP/GS                    | Fam35  | 35.3    | 35: f/m/aF/uM            | maternal       | PALLD                                     | PALLD(cand)                          | no              |
| 4q35.2       | chr4:186408181-186610376 | 202196      | GAIN     | SNP/GS             | SNP/GS                    | Fam1   | 1.3     | 1: f/m/aM                | maternal       | FAT1,F11-AS1,MTNR1A                       | FAT1(HC)                             | no              |
| 4q35.2       | chr4:187715944-188681612 | 965669      | LOSS     | SNP/GS             | SNP/GS                    | Fam70  | 70.3    | 70: f/m/aM               | paternal       | LINC01060,TRIML1,TRIML2,ZFP42             | .                                    | no              |
| 5p15.33      | chr5:437001-462457       | 25457       | GAIN     | SNP/GS             | GS                        | Fam64  | 64.3    | 64: f/m/aM               | paternal       | AHRR,EXOC3,EXOC3-AS1,PDCC6-AHRR           | EXOC3(cand)                          | no              |
| 5p15.31      | chr5:7238099-7468447     | 230349      | GAIN     | SNP                | SNP                       | Fam91  | 91.3    | 91: m/aM/dM/aM/dM        | maternal       | ADCY2,LOC442132,LINC02123,LINC02142       | ADCY2(cand)                          | no              |
| 5p15.31      | chr5:7410483-7471380     | 60898       | GAIN     | SNP/GS             | GS                        | Fam81  | 81.3    | 81: f/m/aM/uM            | paternal       | ADCY2                                     | ADCY2(cand)                          | no              |
| 5p13.2       | chr5:37453605-37629929   | 176325      | LOSS     | SNP/GS             | SNP/GS                    | Fam61  | 61.3    | 61: f/m/aM               | paternal       | WDR70                                     | .                                    | no              |
| 5q11.2       | chr5:56121218-56138759   | 17542       | GAIN     | SNP/GS             | GS                        | Fam68  | 68.3    | 68: f/m/aF/uF/uM         | paternal       | ANKRD55                                   | .                                    | no              |
| 5q12.3       | chr5:67060542-67176929   | 116388      | GAIN     | SNP/GS             | SNP/GS                    | Fam23  | 23.3    | 23: f/m/aM/dF/uFs        | paternal       | MAST4                                     | .                                    | no              |

|              |                           |        |      |        |        |        |       |                      |                |                                                     |                                     |     |
|--------------|---------------------------|--------|------|--------|--------|--------|-------|----------------------|----------------|-----------------------------------------------------|-------------------------------------|-----|
| 5q13.2       | chr5:73633702-73844631    | 210930 | GAIN | SNP/GS | SNP/GS | Fam23  | 23.3  | 23: f/m/aM/dF/uFs    | paternal       | ARHGEF28                                            | .                                   | no  |
| 5q14.1       | chr5:79401623-79420576    | 18954  | LOSS | SNP/GS | GS     | Fam82  | 82.3  | 82: f/m/aM/uF        | maternal       | HOMER1                                              | HOMER1(cand)                        | yes |
| 5q21.2       | chr5:103542040-103809577  | 267538 | GAIN | SNP/GS | SNP/GS | Fam25  | 25.3  | 25: f/m/aM           | maternal       | NUDT12                                              | .                                   | no  |
| 5q21.3       | chr5:108496181-109233820  | 737640 | GAIN | SNP/GS | SNP/GS | Fam73  | 73.3  | 73: f/m/aF/uM        | <b>de novo</b> | FER,LINC01023                                       | .                                   | yes |
| 5q23.1       | chr5:121953524-121970220  | 16697  | GAIN | SNP/GS | GS     | Fam52  | 52.3  | 52: f/m/aM           | paternal       | SRFBP1                                              | .                                   | no  |
| 5q31.2       | chr5:138536201-138548992  | 12792  | GAIN | SNP/GS | GS     | Fam11  | 11.3  | 11: f/m/aM/uM        | paternal       | ETF1                                                | ETF1(cand)                          | no  |
| 6p12.3       | chr6:49462173-49480480    | 18308  | GAIN | SNP/GS | GS     | Fam56  | 56.4  | 56: f/m/aF/aM        | paternal       | MUT,CENPQ                                           | MMUT(HC)                            | no  |
| 6q12         | chr6:63563200-63698372    | 135173 | LOSS | SNP    | SNP    | Fam117 | 117.3 | 117: f/m/aM/aF       | maternal       | PHF3,PTP4A1,LOC128125822                            | PHF3(HC),PTP4A1(cand)               | yes |
| 6q12         | chr6:65218009-65333510    | 115502 | LOSS | SNP/GS | SNP/GS | Fam105 | 105.3 | 105: f/m/aM          | maternal       | EYS,LOC441155                                       | EYS(cand)                           | no  |
| 6q13         | chr6:73746981-73766013    | 19033  | GAIN | SNP/GS | GS     | Fam19  | 19.3  | 19: f/m/aM           | maternal       | CD109                                               | .                                   | no  |
| 6q25.1       | chr6:151534004-151591862  | 57859  | LOSS | SNP/GS | SNP/GS | Fam86  | 86.3  | 86: f/m/aF           | paternal       | CCDC170                                             | .                                   | no  |
| 6q25.3       | chr6:156870642-156885949  | 15308  | LOSS | SNP/GS | SNP/GS | Fam56  | 56.3  | 56: f/m/aF/aM        | maternal       | ARID1B                                              | ARID1B(HC)                          | yes |
| 6q27         | chr6:167104592-167114687  | 10096  | LOSS | SNP/GS | GS     | Fam28  | 28.3  | 28: f/m/aF/uF        | paternal       | CCR6                                                | .                                   | no  |
| 7p22.3       | chr7:261054-472257        | 211204 | GAIN | SNP/GS | GS     | Fam53  | 53.3  | 53: f/m/aM           | maternal       | FOXL3,FOXL3-OT1,LOC442497,LOC116435278,LOC112267991 | .                                   | no  |
| 7p21.3       | chr7:12351493-12562201    | 210709 | GAIN | SNP/GS | SNP/GS | Fam86  | 86.3  | 86: f/m/aF           | maternal       | LOC102725191,VWDE                                   | .                                   | no  |
| 7q11.21      | chr7:64690471-64937553    | 247083 | LOSS | SNP    | SNP    | Fam41  | 41.3  | 41: f/m/aM/uM        | paternal       | ZNF107,ZNF138,ZNF273                                | .                                   | no  |
| 7q11.22      | chr7:72086040-72107051    | 21012  | GAIN | SNP/GS | GS     | Fam95  | 95.3  | 95: f/m/aM/aM/uF     | maternal       | CALN1                                               | .                                   | no  |
| 7q11.23      | chr7:76046887-76062107    | 15221  | GAIN | SNP/GS | GS     | Fam22  | 22.3  | 22: f/m/aF/aF/uF     | maternal       | MDH2,STYXL1                                         | MDH2(HC),STYXL1(cand)               | no  |
| 7q22.3       | chr7:107621000-107641898  | 20899  | LOSS | SNP/GS | GS     | Fam19  | 19.3  | 19: f/m/aM           | paternal       | BCAP29,DUS4L-BCAP29                                 | .                                   | no  |
| 7q31.1       | chr7:112301121-112322776  | 21656  | LOSS | SNP/GS | GS     | Fam102 | 102.3 | 102: f/m/aM          | paternal       | ZNF277                                              | .                                   | no  |
| 7q31.2       | chr7:117660201-117670913  | 10713  | LOSS | SNP/GS | GS     | Fam107 | 107.3 | 107: f/m/aM          | maternal       | CFTR                                                | .                                   | no  |
| 7q31.31      | chr7:121174075-121269627  | 95553  | LOSS | SNP/GS | SNP/GS | Fam79  | 79.3  | 79: f/m/aM/uM        | maternal       | CPED1                                               | .                                   | no  |
| 7q32.1       | chr7:127719389-127968829  | 249441 | LOSS | SNP/GS | SNP/GS | Fam109 | 109.3 | 109: f/m/aM          | paternal       | SND1                                                | SND1(cand)                          | yes |
| 7q32.1       | chr7:128288062-128307786  | 19725  | GAIN | SNP/GS | GS     | Fam77  | 77.3  | 77: f/m/aM/aF/uM/uFs | paternal       | RBM28                                               | RBM28(HC)                           | no  |
| 7q36.3       | chr7:157340148-157479781  | 139634 | GAIN | SNP/GS | SNP/GS | Fam48  | 48.3  | 48: f/m/aM/uM        | maternal       | DNAJB6,LOC101927914                                 | DNAJB6(cand)                        | no  |
| 8p23.3       | chr8:460393-1203174       | 742782 | GAIN | SNP/GS | SNP/GS | Fam106 | 106.3 | 106: f/m/aM          | paternal       | DLGAP2,ERICH1,FBXO25,LOC401442,LOC105377777,TDRP    | DLGAP2(cand)                        | no  |
| 8p22         | chr8:17471896-17509420    | 37525  | LOSS | SNP/GS | GS     | Fam57  | 57.3  | 57: f/m/aM/uF        | paternal       | SLC7A2                                              | .                                   | no  |
| 8q11.22      | chr8:51586310-51596780    | 10471  | LOSS | SNP/GS | GS     | Fam67  | 67.3  | 67: f/m/aM/uF        | maternal       | PXDNL                                               | .                                   | no  |
| 8q13.3       | chr8:70685463-70807482    | 122020 | LOSS | SNP/GS | SNP/GS | Fam15  | 15.3  | 15: f/m/aM/aM        | maternal       | XKR9                                                | .                                   | no  |
| 8q21.13      | chr8:76734172-76944750    | 210579 | GAIN | SNP/GS | SNP/GS | Fam24  | 24.4  | 24: f/m/aM/aM        | paternal       | ZFHX4                                               | ZFHX4(HC)                           | no  |
| 8q22.1       | chr8:96235252-96246875    | 11624  | LOSS | SNP/GS | GS     | Fam87  | 87.3  | 87: f/m/aM/uM        | paternal       | MTERF3,UQCRB,UQCRB-AS1                              | UQCRB(cand)                         | no  |
| 8q22.3       | chr8:104392687-104406426  | 13740  | LOSS | SNP/GS | SNP/GS | Fam85  | 85.3  | 85: f/m/aM/aM        | maternal       | DPYS                                                | DPYS(cand)                          | yes |
| 8q24.3       | chr8:144793746-144807498  | 13753  | LOSS | SNP/GS | GS     | Fam103 | 103.3 | 103: f/m/aM          | maternal       | ZNF517                                              | ZNF517(cand)                        | no  |
| 8q24.3       | chr8:144920754-144932476  | 11723  | LOSS | SNP    | SNP    | Fam115 | 115.3 | 115: f/m/aF/aM/aF    | maternal       | ZNF16                                               | .                                   | no  |
| 9p24.2       | chr9:2726669-2792829      | 66161  | LOSS | SNP/GS | SNP/GS | Fam14  | 14.3  | 14: f/m/aM/aM        | maternal       | KCNV2                                               | KCNV2(cand)                         | yes |
| 9p24.2       | chr9:3457204-3524371      | 67168  | GAIN | SNP/GS | GS     | Fam67  | 67.3  | 67: f/m/aM/uF        | maternal       | RFX3                                                | RFX3(HC)                            | no  |
| 9p24.1       | chr9:5379481-5787518      | 408038 | LOSS | SNP/GS | SNP/GS | Fam114 | 114.3 | 114: f/m/aM          | paternal       | RIC1,ERMP1,PLGRKT,CD274,PCDC1LG2                    | RIC1(HC)                            | no  |
| 9p22.1       | chr9:19372707-19422113    | 49407  | GAIN | SNP/GS | GS     | Fam47  | 47.3  | 47: f/m/aM           | paternal       | ACER2,DENND4C,RPS6                                  | RPS6(cand)                          | no  |
| 9p21.1       | chr9:28457113-28476232    | 19120  | GAIN | SNP/GS | GS     | Fam82  | 82.3  | 82: f/m/aM/uF        | paternal       | LINGO2                                              | LINGO2(cand)                        | no  |
| 9p21.1-p13.3 | chr9:33140780-33262543    | 121764 | GAIN | SNP/GS | SNP/GS | Fam46  | 46.3  | 46: f/m/aM/uM        | paternal       | BAG1,B4GALT1,B4GALT1-AS1,SPINK4                     | BAG1(cand),B4GALT1(HC)              | yes |
| 9p13.3       | chr9:34296619-34311569    | 14951  | LOSS | SNP/GS | SNP/GS | Fam13  | 13.3  | 13: f/m/aM           | maternal       | KIF24                                               | .                                   | no  |
| 9q21.11      | chr9:68415483-68758083    | 342601 | GAIN | SNP/GS | SNP/GS | Fam65  | 65.3  | 65: f/m/aM/uF/uF     | paternal       | PIP5K1B,PGM5,TMEM252,LINC01506                      | .                                   | no  |
| 9q22.32      | chr9:95221201-95255683    | 34483  | LOSS | SNP/GS | SNP/GS | Fam96  | 96.3  | 96: f/m/aM/uF        | maternal       | FANCC                                               | FANCC(cand)                         | yes |
| 9q31.1       | chr9:102974937-102996386  | 21450  | GAIN | SNP/GS | GS     | Fam15  | 15.3  | 15: f/m/aM/aM        | paternal       | CYLC2                                               | CYLC2(cand)                         | no  |
| 9q31.3       | chr9:108926659-108990573  | 63915  | GAIN | SNP/GS | SNP/GS | Fam56  | 56.3  | 56: f/m/aF/aM        | paternal       | ABITRAM,CTNNA1,ELP1                                 | ELP1(cand)                          | no  |
| 9q33.3       | chr9:125219881-125231633  | 11753  | LOSS | SNP/GS | GS     | Fam60  | 60.3  | 60: f/m/aF           | maternal       | RABEPK                                              | RABEPK(cand)                        | no  |
| 9q33.3       | chr9:127380921-127434723  | 53803  | GAIN | SNP/GS | SNP/GS | Fam42  | 42.3  | 42: f/m/aM/uF        | paternal       | GARNL3,SLC2A8,ZNF79                                 | GARNL3(cand)                        | no  |
| 10p15.2      | chr10:3040783-3121006     | 80224  | LOSS | SNP/GS | SNP/GS | Fam17  | 17.3  | 17: f/m/aM/uM        | maternal       | PFKP,PFKP-DT                                        | PFKP(cand)                          | yes |
| 10p11.22     | chr10:32788364-32815841   | 27478  | LOSS | SNP/GS | GS     | Fam56  | 56.3  | 56: f/m/aF/aM        | maternal       | CCDC7                                               | .                                   | no  |
| 10p11.21     | chr10:34838959-35069381   | 230423 | GAIN | SNP/GS | SNP/GS | Fam11  | 11.3  | 11: f/m/aM/uM        | paternal       | CUL2                                                | CUL2(cand)                          | no  |
| 10q23.1      | chr10:80563654-80575364   | 11711  | LOSS | SNP/GS | GS     | Fam28  | 28.3  | 28: f/m/aF/uF        | paternal       | SH2D4B                                              | .                                   | no  |
| 10q23.31     | chr10:90706464-90845238   | 138775 | GAIN | SNP/GS | SNP/GS | Fam74  | 74.3  | 74: f/m/aM/uM        | maternal       | HTR7                                                | HTR7(cand)                          | no  |
| 10q24.1      | chr10:95440563-95689410   | 248848 | GAIN | SNP/GS | SNP/GS | Fam47  | 47.3  | 47: f/m/aM           | maternal       | ALDH18A1,SORBS1,TCTN3                               | ALDH18A1(HC),SORBS1(cand),TCTN3(HC) | yes |
| 10q24.32     | chr10:102640823-102666335 | 25513  | GAIN | SNP/GS | GS     | Fam67  | 67.3  | 67: f/m/aM/uF        | maternal       | TRIM8                                               | TRIM8(HC)                           | yes |

|                 |                           |         |      |        |        |        |       |                             |                |                                                                                                                                                                                                                          |                                                                                                                                                          |     |
|-----------------|---------------------------|---------|------|--------|--------|--------|-------|-----------------------------|----------------|--------------------------------------------------------------------------------------------------------------------------------------------------------------------------------------------------------------------------|----------------------------------------------------------------------------------------------------------------------------------------------------------|-----|
| 10q25.2-q25.3   | chr10:113078246-113111305 | 33060   | LOSS | SNP/GS | GS     | Fam47  | 47.3  | 47: <u>f/m/aM</u>           | maternal       | TCF7L2                                                                                                                                                                                                                   | TCF7L2(HC)                                                                                                                                               | yes |
| 10q26.3         | chr10:133323788-133366683 | 42896   | GAIN | SNP/GS | SNP/GS | Fam89  | 89.3  | 89: <u>f/m/aM</u>           | maternal       | CALY,ECHS1,PRAP1,FUOM                                                                                                                                                                                                    | CALY(cand),ECHS1(HC)                                                                                                                                     | no  |
| 11q12.1         | chr11:58778082-58909459   | 131378  | GAIN | SNP/GS | GS     | Fam84  | 84.3  | 84: <u>f/m/aF</u>           | paternal       | GLYATL1,GLYATL2                                                                                                                                                                                                          | .                                                                                                                                                        | no  |
| 11q24.2         | chr11:125024122-125040200 | 16079   | GAIN | SNP/GS | GS     | Fam113 | 113.4 | 113: <u>f/m/aF/raM/uF</u>   | N/A            | CCDC15                                                                                                                                                                                                                   | .                                                                                                                                                        | no  |
| 12p13.33        | chr12:662992-688533       | 25542   | GAIN | SNP/GS | SNP/GS | Fam31  | 31.3  | 31: <u>f/m/aM/uF</u>        | paternal       | NINJ2                                                                                                                                                                                                                    | NINJ2(cand)                                                                                                                                              | no  |
| 12p12.2         | chr12:20863827-20884104   | 20278   | LOSS | SNP/GS | SNP/GS | Fam108 | 108.3 | 108: <u>f/m/aM</u>          | paternal       | SLCO1B3,SLCO1B3-SLCO1B7                                                                                                                                                                                                  | SLCO1B3(cand)                                                                                                                                            | no  |
| 12p12.1         | chr12:21412398-21434012   | 21615   | LOSS | SNP/GS | GS     | Fam26  | 26.3  | 26: <u>f/m/aM/uM</u>        | maternal       | SLCO1A2                                                                                                                                                                                                                  | SLCO1A2(cand)                                                                                                                                            | no  |
| 12q13.13        | chr12:52692556-52744846   | 52291   | GAIN | SNP    | SNP    | Fam118 | 118.4 | 118: <u>f/m/aM/aF/uM</u>    | paternal       | KRT77                                                                                                                                                                                                                    | .                                                                                                                                                        | no  |
| 12q13.13        | chr12:52755682-52770967   | 15286   | LOSS | SNP/GS | SNP/GS | Fam56  | 56.3  | 56: <u>f/m/aF/aM</u>        | maternal       | KRT76                                                                                                                                                                                                                    | .                                                                                                                                                        | no  |
| 12q13.3         | chr12:56941756-56981828   | 40073   | GAIN | SNP/GS | GS     | Fam16  | 16.3  | 16: <u>f/m/aM/aM</u>        | paternal       | RDH16                                                                                                                                                                                                                    | .                                                                                                                                                        | no  |
| 12q21.1         | chr12:75214941-75283497   | 68557   | GAIN | SNP/GS | GS     | Fam92  | 92.3  | 92: <u>f/m/aM/raM</u>       | paternal       | CAPS2,LOC100130268                                                                                                                                                                                                       | CAPS2(cand)                                                                                                                                              | no  |
| 12q24.13        | chr12:112304842-112441663 | 136822  | GAIN | SNP/GS | GS     | Fam22  | 22.3  | 22: <u>f/m/aF/aF/uF</u>     | maternal       | HECTD4,PTPN11,RPL6                                                                                                                                                                                                       | HECTD4(HC),PTPN11(HC),RPL6(cand)                                                                                                                         | no  |
| 12q24.31-q24.23 | chr12:120295260-120318770 | 23511   | LOSS | SNP/GS | GS     | Fam77  | 77.3  | 77: <u>f/m/aM/aF/uM/uFs</u> | maternal       | SIRT4                                                                                                                                                                                                                    | .                                                                                                                                                        | no  |
| 12q24.31        | chr12:122261800-122275427 | 13628   | GAIN | SNP/GS | GS     | Fam12  | 12.3  | 12: <u>f/m/aM/uM/aM</u>     | maternal       | CLIP1,VPS33A                                                                                                                                                                                                             | CLIP1(cand)                                                                                                                                              | no  |
| 13q12.12        | chr13:24621058-24764295   | 143238  | GAIN | SNP    | SNP    | Fam93  | 93.3  | 93: <u>f/m/aM/uM</u>        | paternal       | ATP12A,RNF17                                                                                                                                                                                                             | RNF17(cand)                                                                                                                                              | no  |
| 13q12.12        | chr13:24640872-24736612   | 95741   | GAIN | SNP/GS | SNP/GS | Fam29  | 29.3  | 29: <u>f/m/aF/uM</u>        | maternal       | ATP12A                                                                                                                                                                                                                   | .                                                                                                                                                        | no  |
| 13q21.32        | chr13:66774853-66860306   | 85454   | LOSS | SNP/GS | SNP/GS | Fam97  | 97.3  | 97: <u>f/m/aM/aF</u>        | maternal       | PCDH9,PCDH9-AS2                                                                                                                                                                                                          | PCDH9(cand)                                                                                                                                              | no  |
| 13q31.3         | chr13:93533137-93587893   | 54757   | GAIN | SNP/GS | SNP/GS | Fam94  | 94.3  | 94: <u>f/m/aM</u>           | paternal       | GPC6                                                                                                                                                                                                                     | GPC6(cand)                                                                                                                                               | yes |
| 13q34           | chr13:113639887-113736598 | 96712   | GAIN | SNP/GS | GS     | Fam105 | 105.3 | 105: <u>f/m/aM</u>          | maternal       | ATP4B,GRK1,TFDP1                                                                                                                                                                                                         | TFDP1(cand)                                                                                                                                              | no  |
| 13q34           | chr13:113808856-113835183 | 26328   | GAIN | SNP/GS | GS     | Fam71  | 71.3  | 71: <u>f/m/aF</u>           | maternal       | TMEM255B,GAS6,GAS6-AS1                                                                                                                                                                                                   | .                                                                                                                                                        | no  |
| 14q11.2         | chr14:20498474-20517970   | 19497   | GAIN | SNP/GS | GS     | Fam95  | 95.4  | 95: <u>f/m/aM/aM/uF</u>     | maternal       | RNASE10                                                                                                                                                                                                                  | .                                                                                                                                                        | no  |
| 14q23.2         | chr14:63305126-63398877   | 93752   | GAIN | SNP/GS | GS     | Fam29  | 29.3  | 29: <u>f/m/aF/uM</u>        | maternal       | PPP2R5E,GPHB5                                                                                                                                                                                                            | PPP2R5E(cand)                                                                                                                                            | no  |
| 14q32.32        | chr14:102798110-102852223 | 54114   | GAIN | SNP/GS | GS     | Fam43  | 43.3  | 43: <u>f/m/aM</u>           | paternal       | TRAF3                                                                                                                                                                                                                    | TRAF3(cand)                                                                                                                                              | no  |
| 14q32.33        | chr14:103979304-104040169 | 60866   | GAIN | SNP/GS | GS     | Fam28  | 28.3  | 28: <u>f/m/aF/uF</u>        | maternal       | TDRD9                                                                                                                                                                                                                    | .                                                                                                                                                        | no  |
| 15q11.2         | chr15:22636123-23102073   | 465951  | GAIN | SNP/GS | SNP/GS | Fam99  | 99.4  | 99: <u>f/m/aM/aM</u>        | paternal       | CYFIP1,LOC283683,NIPA1,NIPA2,TUBGCP5,WHAMMP3                                                                                                                                                                             | CYFIP1(cand),NIPA1(cand),NIP A2(cand),TUBGCP5(cand)                                                                                                      | yes |
| 15q11.2         | chr15:22636123-23117882   | 481760  | LOSS | SNP    | SNP    | Fam117 | 117.3 | 117: <u>f/m/aM/aF</u>       | paternal       | CYFIP1,LOC283683,NIPA1,NIPA2,TUBGCP5,WHAMMP3                                                                                                                                                                             | CYFIP1(cand),NIPA1(cand),NIP A2(cand),TUBGCP5(cand)                                                                                                      | yes |
| 15q13.2-q13.3   | chr15:30626840-32222140   | 1595301 | LOSS | SNP    | SNP    | Fam115 | 115.3 | 115: <u>f/m/aF/aM/aF</u>    | paternal       | ARHGAP11B,CHRNA7,FAN1,HERC2P10,KLF13,LINC02352,LINC03034,LOC100288637,MIR211,MTMR10,OTUD7A,TRPM1                                                                                                                         | ARHGAP11B(cand),CHRNA7(cand),FAN1(cand),OTUD7A(cand),TRPM1(cand)                                                                                         | yes |
| 15q13.2-q13.3   | chr15:30635159-32222140   | 1586982 | GAIN | SNP/GS | SNP/GS | Fam81  | 81.3  | 81: <u>f/m/aM/uM</u>        | maternal       | ARHGAP11B,CHRNA7,FAN1,HERC2P10,KLF13,LINC02352,LINC03034,LOC100288637,MIR211,MTMR10,OTUD7A,TRPM1                                                                                                                         | ARHGAP11B(cand),CHRNA7(cand),FAN1(cand),OTUD7A(cand),TRPM1(cand)                                                                                         | yes |
| 15q15.1         | chr15:41919964-41930311   | 10348   | LOSS | SNP/GS | GS     | Fam68  | 68.3  | 68: <u>f/m/aF/uF/uM</u>     | paternal       | EHD4,EHD4-AS1                                                                                                                                                                                                            | .                                                                                                                                                        | no  |
| 15q22.31        | chr15:64083030-64104271   | 21242   | GAIN | SNP/GS | GS     | Fam19  | 19.3  | 19: <u>f/m/aM</u>           | maternal       | SNX1,CIAO2A                                                                                                                                                                                                              | SNX1(cand)                                                                                                                                               | no  |
| 15q25.2         | chr15:82742884-82782598   | 39715   | GAIN | SNP/GS | SNP/GS | Fam22  | 22.3  | 22: <u>f/m/aF/aF/uF</u>     | maternal       | FSD2,SCARNA15,SNHG21                                                                                                                                                                                                     | .                                                                                                                                                        | no  |
| 15q26.1         | chr15:89676153-89694595   | 18443   | LOSS | SNP/GS | SNP/GS | Fam52  | 52.3  | 52: <u>f/m/aM</u>           | paternal       | PEX11A,PLIN1,WDR93                                                                                                                                                                                                       | PLIN1(cand),WDR93(cand)                                                                                                                                  | no  |
| 15q26.3         | chr15:101467741-101859739 | 391999  | GAIN | SNP/GS | SNP/GS | Fam66  | 66.3  | 66: <u>f/m/aM</u>           | paternal       | LINC02348,OR4F13P,OR4F15,OR4F6,PCSK6,TARS3,TM2D3,UBE2Q2P13                                                                                                                                                               | TM2D3(cand)                                                                                                                                              | no  |
| 15q26.3         | chr15:101486854-101610964 | 124111  | GAIN | SNP/GS | SNP/GS | Fam90  | 90.3  | 90: <u>f/m/aF/dM</u>        | maternal       | LINC02348,PCSK6                                                                                                                                                                                                          | .                                                                                                                                                        | no  |
| 16p13.3         | chr16:3053034-3071915     | 18882   | LOSS | SNP/GS | GS     | Fam94  | 94.3  | 94: <u>f/m/aM</u>           | maternal       | MMP25-AS1,MMP25,IL32                                                                                                                                                                                                     | .                                                                                                                                                        | no  |
| 16p13.3         | chr16:3055942-3075375     | 19434   | LOSS | SNP/GS | GS     | Fam28  | 28.3  | 28: <u>f/m/aF/uF</u>        | paternal       | MMP25-AS1,MMP25,IL32                                                                                                                                                                                                     | .                                                                                                                                                        | no  |
| 16p13.2         | chr16:8446703-8794331     | 347629  | LOSS | SNP/GS | SNP/GS | Fam105 | 105.3 | 105: <u>f/m/aM</u>          | paternal       | ABAT,TMEM114,METTL22                                                                                                                                                                                                     | ABAT(HC),TMEM114(cand)                                                                                                                                   | yes |
| 16p11.2         | chr16:29584162-30188392   | 604231  | LOSS | SNP    | SNP    | Fam118 | 118.4 | 118: <u>f/m/aM/aF/uM</u>    | <b>de novo</b> | ALDOA,ASPHD1,C16orf54,C16orf92,CDIPT,CDIPTOSP,CORO1A,DOC2A,GDPD3,HIRIP3,INO80E,KCTD13,KIF22,LOC112694756,MAPK3,MAZ,MIR3680-2,MVP,PAGR1,PPP4C,PRRT2,QPRT,SEZ6L2,SMG1P2,SPN2,TAOK2,TBX6,TLCD3B,TMEM219,YPEL3,YPEL3-DT,ZG16 | ALDOA(cand),ASPHD1(cand),CORO1A(cand),CORO1A(HC),KCTD13(cand),KIF22(cand),MAPK3(cand),MAZ(cand),PRRT2(HC),QPRT(cand),SEZ6L2(cand),TAOK2(cand),TBX6(cand) | yes |
| 16p11.2         | chr16:30409802-30523250   | 113449  | GAIN | SNP/GS | SNP/GS | Fam87  | 87.3  | 87: <u>f/m/aM/uM</u>        | paternal       | DCTPP1,ITGAL,MIR4518,SEPHS2,SNORA80C,ZNF771                                                                                                                                                                              | .                                                                                                                                                        | no  |
| 16q23.1         | chr16:78256339-78314555   | 58217   | LOSS | SNP/GS | SNP/GS | Fam45  | 45.3  | 45: <u>f/m/aM/uF</u>        | paternal       | WWOX                                                                                                                                                                                                                     | WWOX(HC)                                                                                                                                                 | yes |
| 16q23.2-q23.3   | chr16:81527671-82084386   | 556716  | GAIN | SNP/GS | SNP/GS | Fam107 | 107.3 | 107: <u>f/m/aM</u>          | maternal       | CMIP,HSD17B2,LOC100129617,MIR6504,MIR7854,PLCG2,SDR42E1                                                                                                                                                                  | CMIP(cand),PLCG2(cand)                                                                                                                                   | no  |
| 16q24.1         | chr16:84238533-84314440   | 75908   | GAIN | SNP/GS | SNP/GS | Fam22  | 22.3  | 22: <u>f/m/aF/aF/uF</u>     | paternal       | KCNG4,WFDC1                                                                                                                                                                                                              | WFDC1(cand)                                                                                                                                              | no  |
| 17p13.3         | chr17:238137-310625       | 72489   | GAIN | SNP/GS | SNP/GS | Fam101 | 101.3 | 101: <u>f/m/aM</u>          | maternal       | RPH3AL                                                                                                                                                                                                                   | .                                                                                                                                                        | no  |

|                 |                         |         |      |        |        |        |       |                           |                |                                                                                                                                               |                                                                                                                                                                                                |                                    |     |
|-----------------|-------------------------|---------|------|--------|--------|--------|-------|---------------------------|----------------|-----------------------------------------------------------------------------------------------------------------------------------------------|------------------------------------------------------------------------------------------------------------------------------------------------------------------------------------------------|------------------------------------|-----|
| 17p13.3         | chr17:1065582-1342604   | 277023  | GAIN | SNP/GS | SNP/GS | Fam12  | 12.5  | 12: <u>f/m/aM/uM/aM</u>   | maternal       | ABR,BHLHA9,TRARG1                                                                                                                             | ABR(cand),BHLHA9(cand)                                                                                                                                                                         | no                                 |     |
| 17p13.3         | chr17:1923825-1948136   | 24312   | GAIN | SNP/GS | GS     | Fam44  | 44.3  | 44: <u>f/m/aM/uF</u>      | paternal       | RTN4RL1                                                                                                                                       | RTN4RL1(cand)                                                                                                                                                                                  | no                                 |     |
| 17p13.1         | chr17:9904545-9997527   | 92983   | GAIN | SNP/GS | GS     | Fam110 | 110.4 | 110: <u>f/m/aM/aM/uMs</u> | maternal       | GAS7,RCVRN                                                                                                                                    | GAS7(cand)                                                                                                                                                                                     | no                                 |     |
| 17p11.2         | chr17:18904539-18931127 | 26589   | GAIN | SNP/GS | GS     | Fam12  | 12.3  | 12: <u>f/m/aM/uM/aM</u>   | maternal       | PRPSAP2                                                                                                                                       | .                                                                                                                                                                                              | no                                 |     |
| 17q21.31        | chr17:43324355-43702997 | 378643  | GAIN | SNP/GS | SNP/GS | Fam94  | 94.3  | 94: <u>f/m/aM</u>         | maternal       | ARL4,DDHX8,ETV4,LINC00910,MEOX1,MIR2117,MIR2117HG                                                                                             | MEOX1(cand)                                                                                                                                                                                    | no                                 |     |
| 17q21.31        | chr17:45882068-45980967 | 98900   | GAIN | SNP/GS | SNP/GS | Fam39  | 39.3  | 39: <u>f/m/aM</u>         | paternal       | MAPT,MAPT-AS1,MAPT-IT1                                                                                                                        | MAPT(cand)                                                                                                                                                                                     | no                                 |     |
| 17q23.3         | chr17:63872557-63906241 | 33685   | LOSS | SNP    | SNP    | Fam121 | 121.4 | 121: <u>f/m/aF/aM</u>     | maternal       | CSH1,CSH2,GH2                                                                                                                                 | .                                                                                                                                                                                              | no                                 |     |
| 17q25.1         | chr17:75895283-75908604 | 13322   | LOSS | SNP/GS | GS     | Fam25  | 25.3  | 25: <u>f/m/aM</u>         | paternal       | MRPL38,TRIM65                                                                                                                                 | .                                                                                                                                                                                              | no                                 |     |
| 17q25.3         | chr17:81464264-81510148 | 45885   | GAIN | SNP/GS | SNP/GS | Fam106 | 106.3 | 106: <u>f/m/aM</u>        | maternal       | ACTG1,BAHCC1,LINC01971                                                                                                                        | ACTG1(HC)                                                                                                                                                                                      | no                                 |     |
| 18p11.23        | chr18:7200444-7737735   | 537292  | GAIN | SNP/GS | SNP/GS | Fam25  | 25.3  | 25: <u>f/m/aM</u>         | maternal       | LRRC30,LOC112577592,PTPRM                                                                                                                     | PTPRM(cand)                                                                                                                                                                                    | no                                 |     |
| 18q12.2         | chr18:36897900-36960200 | 62301   | LOSS | SNP/GS | GS     | Fam85  | 85.4  | 85: <u>f/m/aM/aM</u>      | paternal       | LOC105372069,KIAA1328                                                                                                                         | .                                                                                                                                                                                              | no                                 |     |
| 18q21.1         | chr18:46643136-46684359 | 41224   | GAIN | SNP/GS | GS     | Fam96  | 96.3  | 96: <u>f/m/aM/uF</u>      | maternal       | ST8SIA5,LOXHD1                                                                                                                                | .                                                                                                                                                                                              | no                                 |     |
| 19p13.3         | chr19:364427-384382     | 19956   | LOSS | SNP/GS | SNP/GS | Fam43  | 43.3  | 43: <u>f/m/aM</u>         | paternal       | THEG                                                                                                                                          | .                                                                                                                                                                                              | no                                 |     |
| 19p13.3         | chr19:747510-779577     | 32068   | GAIN | SNP/GS | GS     | Fam110 | 110.3 | 110: <u>f/m/aM/aM/uMs</u> | paternal       | PALM,MISP                                                                                                                                     | PALM(cand)                                                                                                                                                                                     | no                                 |     |
| 19p13.3         | chr19:2892921-2948514   | 55594   | LOSS | SNP/GS | SNP/GS | Fam32  | 32.3  | 32: <u>f/m/aM/uM</u>      | paternal       | ZNF57,ZNF77                                                                                                                                   | .                                                                                                                                                                                              | no                                 |     |
| 19p13.3+169:195 | chr19:3804703-3831783   | 27081   | GAIN | SNP    | SNP    | Fam115 | 115.4 | 115: <u>f/m/aF/aM/aF</u>  | maternal       | ZFR2                                                                                                                                          | .                                                                                                                                                                                              | no                                 |     |
| 19p13.2         | chr19:7250375-7305938   | 55564   | GAIN | SNP/GS | GS     | Fam49  | 49.3  | 49: <u>f/m/aM</u>         | paternal       | INSR                                                                                                                                          | INSR(cand)                                                                                                                                                                                     | no                                 |     |
| 19p13.2         | chr19:8257238-8270817   | 13580   | GAIN | SNP/GS | GS     | Fam7   | 7.4   | 7: <u>f/m/aM/aM/uM</u>    | paternal       | CERS4                                                                                                                                         | CERS4(cand)                                                                                                                                                                                    | no                                 |     |
| 19q13.2         | chr19:38670314-38770582 | 100269  | GAIN | SNP/GS | SNP/GS | Fam13  | 13.3  | 13: <u>f/m/aM</u>         | paternal       | ACTN4,CAPN12                                                                                                                                  | ACTN4(cand),CAPN12(cand)                                                                                                                                                                       | no                                 |     |
| 19q13.32        | chr19:44912872-44927662 | 14791   | LOSS | SNP/GS | GS     | Fam110 | 110.3 | 110: <u>f/m/aM/aM/uMs</u> | paternal       | APOC1P1,APOC1                                                                                                                                 | .                                                                                                                                                                                              | no                                 |     |
| 19q13.33        | chr19:50449126-50484568 | 35443   | LOSS | SNP/GS | GS     | Fam7   | 7.4   | 7: <u>f/m/aM/aM/uM</u>    | paternal       | EMC10,GARIN5A,MYBPC2                                                                                                                          | EMC10(HC)                                                                                                                                                                                      | no                                 |     |
| 19q13.42        | chr19:53892638-53932412 | 39775   | GAIN | SNP/GS | GS     | Fam55  | 55.4  | 55: <u>f/m/aM/aM/dM</u>   | paternal       | CACNG7,PRKCG                                                                                                                                  | CACNG7(cand),PRKCG(HC)                                                                                                                                                                         | no                                 |     |
| 19q13.43        | chr19:56650622-56670856 | 20235   | GAIN | SNP/GS | SNP/GS | Fam36  | 36.3  | 36: <u>f/m/aM/uM</u>      | maternal       | SMIM17,ZNF835,ZNF71-SMIM17                                                                                                                    | .                                                                                                                                                                                              | no                                 |     |
| 20q11.21        | chr20:33154027-33178869 | 24843   | GAIN | SNP/GS | GS     | Fam22  | 22.3  | 22: <u>f/m/aF/aF/uF</u>   | paternal       | BPIFA2                                                                                                                                        | .                                                                                                                                                                                              | no                                 |     |
| 20q13.12        | chr20:45722456-45749534 | 27079   | LOSS | SNP    | SNP    | Fam8   | 8.3   | 8: <u>f/m/aM/uF</u>       | maternal       | SPINT4                                                                                                                                        | .                                                                                                                                                                                              | no                                 |     |
| 20q13.33        | chr20:62821525-62833156 | 11632   | LOSS | SNP/GS | SNP/GS | Fam96  | 96.3  | 96: <u>f/m/aM/uF</u>      | paternal       | COL9A3                                                                                                                                        | COL9A3(cand)                                                                                                                                                                                   | yes                                |     |
| 21q22.11        | chr21:31165520-31653872 | 488353  | LOSS | SNP/GS | SNP/GS | Fam55  | 55.3  | 55: <u>f/m/aM/aM/dM</u>   | paternal       | TIAM1,TIAM1-AS1                                                                                                                               | TIAM1(cand)                                                                                                                                                                                    | yes                                |     |
| 21q22.2         | chr21:39375414-39412460 | 37047   | GAIN | SNP/GS | SNP/GS | Fam57  | 57.3  | 57: <u>f/m/aM/uF</u>      | maternal       | GET1,GET1-SH3BGR,LCA5L                                                                                                                        | GET1(cand)                                                                                                                                                                                     | no                                 |     |
| 21q22.3         | chr21:46140262-46168679 | 28418   | LOSS | SNP/GS | SNP/GS | Fam64  | 64.3  | 64: <u>f/m/aM</u>         | paternal       | FTCD,FTCD-AS1,SPATC1L                                                                                                                         | FTCD(HC)                                                                                                                                                                                       | yes                                |     |
| 22q11.23        | chr22:24678665-24784399 | 105735  | GAIN | SNP/GS | SNP/GS | Fam113 | 113.4 | 113: <u>f/m/aF/raM/uF</u> | N/A            | PIWIL3,TOP1P2                                                                                                                                 | .                                                                                                                                                                                              | no                                 |     |
| 22q12.2         | chr22:29932161-29970614 | 38454   | LOSS | SNP/GS | GS     | Fam31  | 31.3  | 31: <u>f/m/aM/uF</u>      | maternal       | MTMR3                                                                                                                                         | MTMR3(cand)                                                                                                                                                                                    | no                                 |     |
| 22q12.2         | chr22:30600940-30795509 | 194570  | GAIN | SNP/GS | SNP/GS | Fam86  | 86.3  | 86: <u>f/m/aF</u>         | maternal       | DUSP18,MIR3200,OSBP2,PES1,SLC35E4,TCN2                                                                                                        | TCN2(HC)                                                                                                                                                                                       | no                                 |     |
| 18p11.22-p11.21 | chr18:9291609-12509914  | 3218306 | GAIN | SNP/GS | SNP/GS | Fam9   | 9.4   | 9: <u>f/m/aM/dM/uF</u>    | <b>de novo</b> | AFG3L2,ANKRD62,APCDD1,C18orf61,CHMP1B,CIDEA,GNAL,IMPA2,LINC01254,LINC01255,LINC01887,LINC01928,L                                              | NAPG(cand),PIEZO2(HC),PPP4R1(cand),RAB31(cand),RALBP1(cand),OC101927410,LOC105371998,MIR6788,MIR7153,MPPE1(cand),,NAPG,PIEZO2,PPP4R1,PPP4R1-AS1,PRELID3A,RAB31,RALBP1,SLC35G4,SPIRE1,TUBB6,TSW | VAPA(cand),GNAL(cand),AFG3L2(cand) | yes |
| Xp22.33         | chrX:254466-287975      | 33510   | LOSS | SNP/GS | GS     | Fam97  | 97.4  | 97: <u>f/m/aM/aF</u>      | maternal       | PLCXD1                                                                                                                                        | .                                                                                                                                                                                              | no                                 |     |
| Xp22.33         | chrX:1167810-1197997    | 30188   | LOSS | SNP/GS | GS     | Fam21  | 21.3  | 21: <u>f/m/aM/uM</u>      | maternal       | CRLF2                                                                                                                                         | .                                                                                                                                                                                              | no                                 |     |
| Xp22.33         | chrX:1315131-1566172    | 251042  | GAIN | SNP/GS | GS     | Fam33  | 33.3  | 33: <u>f/m/aM/uM</u>      | maternal       | ASMTL,ASMTL-AS1,CSF2RA,IL3RA,LINC00106,P2RY8,SLC25A6                                                                                          | ASMTL(cand),SLC25A6(cand)                                                                                                                                                                      | no                                 |     |
| Xp22.31         | chrX:6532399-8168495    | 1636097 | GAIN | SNP/GS | SNP/GS | Fam23  | 23.4  | 23: <u>f/m/aM/dF/uFs</u>  | paternal       | MIR4767,PUDP,STS,VCX3A,PNPLA4,MIR651,VCX                                                                                                      | STS(cand)                                                                                                                                                                                      | no                                 |     |
| Xp22.11         | chrX:23384110-24802539  | 1418430 | GAIN | SNP/GS | SNP/GS | Fam15  | 15.4  | 15: <u>f/m/aM/aM</u>      | maternal       | ACOT9,APOO,CXorf58,EIF2S3,KLHL15,LOC127933115,PCYT1B,PCYT1B-AS1,PKK3,POLA1,PRDX4,PTCHD1,SAT1,SAT1-DT,SCARNA23,SUPT20HL1,SUPT20HL2,ZFX,ZFX-AS1 | APOO(cand),EIF2S3(HC),KLHL15(HC),POLA1(HC),PRDX4(cand),PTCHD1(HC),SAT1(cand),ZFX(cand)                                                                                                         | no                                 |     |
| Xp22.11         | chrX:23831645-23851788  | 20144   | GAIN | SNP/GS | GS     | Fam85  | 85.3  | 85: <u>f/m/aM/aM</u>      | maternal       | APOO                                                                                                                                          | APOO(cand)                                                                                                                                                                                     | no                                 |     |
| Xp11.4          | chrX:40513917-40631198  | 117282  | GAIN | SNP/GS | SNP/GS | Fam33  | 33.3  | 33: <u>f/m/aM/uM</u>      | maternal       | ATP6AP2,CXorf38,MPC1L                                                                                                                         | ATP6AP2(HC)                                                                                                                                                                                    | no                                 |     |
| Xp11.21         | chrX:57252079-57397441  | 145363  | LOSS | SNP/GS | SNP/GS | Fam113 | 113.3 | 113: <u>f/m/aF/raM/uF</u> | paternal       | FAAH2                                                                                                                                         | FAAH2(cand)                                                                                                                                                                                    | no                                 |     |
| Xq13.3          | chrX:75784933-76167591  | 382659  | GAIN | SNP    | SNP    | Fam117 | 117.4 | 117: <u>f/m/aM/aF</u>     | maternal       | MAGEE2                                                                                                                                        | .                                                                                                                                                                                              | no                                 |     |

<sup>1</sup> Children are listed sequentially after the father and the mother, according to recruitment order. Family members carrying the CNV are underlined; if the CNV is a *de novo* variant, the heterozygous is also indicated in bold. Abbreviations: a, affected; u, unaffected; d, specific learning disability; M, male; F, female; f, father; m, mother; r, relative (uncle); <sup>2</sup> NDD genes reported in GeneTrek (<https://genetrek.pasteur.fr/>) are indicated as “HC” (high-confidence) or “cand” (candidates) in brackets.

Supplementary Table 11: Rare homozygous and compound heterozygous pdSNVs

| Chr   | Position (hg38) | Ref | Alt | Gene    | Amino acid change <sup>1</sup>      | Missense classification (MPC score) | Event type                                   | Individual | Segregation <sup>2</sup> | Nr homozygotes (gnomADv2.1.1/v3.1.2) | GnomAD pRec score <sup>3</sup> | Mode of inheritance in the Genomics England neurology and NDD panel | GeneTrek classification | High-confidence ASD/NDD gene list <sup>4</sup> |
|-------|-----------------|-----|-----|---------|-------------------------------------|-------------------------------------|----------------------------------------------|------------|--------------------------|--------------------------------------|--------------------------------|---------------------------------------------------------------------|-------------------------|------------------------------------------------|
| chr1  | 18691870        | G   | A   | PAX7    | NM_001135254.2:c.703G>A:p.A235T     | DMisA (1.07)                        | Compound heterozygous (SNV/CNV) <sup>5</sup> | 91.3       | 91: <u>m/aM/dM/aM/dM</u> | 0/0                                  | 0.8546                         | biallelic                                                           | Candidate -NDD          | .                                              |
| chr2  | 70087994        | A   | G   | PCBP1   | NM_006196.4:c.251A>G:p.N84S         | DMisA (1.13)                        | Homozygous                                   | 99.3       | 99: <u>f/m/aM/aM</u>     | 1 Male/0                             | 0.089934                       | .                                                                   | Candidate -NDD          | .                                              |
| chr3  | 48412897        | C   | T   | PLXNB1  | NM_001130082.3:c.4699G>A:p.D1567N   | DMisA (1.47)                        | Compound heterozygous                        | 116.4      | 116: <u>f/m/aM/aF</u>    | 1 Female/0                           | 0.99962                        | .                                                                   | Candidate -NDD          | ASD                                            |
| chr3  | 48406876        | T   | G   | PLXNB1  | NM_001130082.3:c.6175A>C:p.T2059P   | DMisA (1.27)                        | Compound heterozygous                        | 116.4      | 116: <u>f/m/aM/aF</u>    | 0/0                                  | 0.99962                        | .                                                                   | Candidate -NDD          | ASD                                            |
| chr12 | 6492309         | G   | A   | MRPL51  | NM_016497.4:c.349C>T:p.L117F        | DMisA (1.27)                        | Homozygous                                   | 1.3        | 1: <u>f/m/aM</u>         | 1 Female/1 Male                      | 0.83089                        | .                                                                   | .                       | .                                              |
| chr14 | 102016376       | T   | C   | DYNC1H1 | NM_001376.5:c.7501T>C:p.S2501P      | DMisB (2.52)                        | Possible compound heterozygous               | 122.3      | 122: <u>f/m/aM</u>       | novel                                | 1.2281E-29                     | monoallelic                                                         | HC-NDD                  | ASD                                            |
| chr14 | 101988838       | G   | C   | DYNC1H1 | NM_001376.5:c.2854G>C:p.E952Q       | DMisA (1.18)                        | Possible compound heterozygous               | 122.3      | 122: <u>f/m/aM</u>       | novel                                | 1.2281E-29                     | monoallelic                                                         | HC-NDD                  | ASD                                            |
| chr19 | 49595846        | G   | C   | PRR12   | NM_020719.3:c.1511G>C:p.G504A       | DMisA (1.23)                        | Compound heterozygous                        | 53.3       | 53: <u>f/m/aM</u>        | 0/0                                  | 7.6646E-10                     | monoallelic                                                         | HC-NDD                  | ASD                                            |
| chr19 | 49596935        | G   | A   | PRR12   | NM_020719.3:c.2600G>A:p.R867H       | DMisA (1.22)                        | Compound heterozygous                        | 53.3       | 53: <u>f/m/aM</u>        | 0/2 Female                           | 7.6646E-10                     | monoallelic                                                         | HC-NDD                  | ASD                                            |
| chr21 | 40369136        | C   | A   | DSCAM   | NM_001389.5:c.618G>T:p.E206D        | DMisA (1.40)                        | Compound heterozygous                        | 120.4      | 120: <u>f/m/aM/aM</u>    | novel                                | 2.8346E-08                     | Not set                                                             | HC-NDD                  | ASD                                            |
| chr21 | 40189118        | C   | T   | DSCAM   | NM_001389.5:exon12:c.G2477A:p.R826Q | DMisA (1.36)                        | Compound heterozygous                        | 120.4      | 120: <u>f/m/aM/aM</u>    | 0/0                                  | 2.8346E-08                     | Not set                                                             | HC-NDD                  | ASD                                            |

The table lists rare homozygous and compound heterozygous pdSNVs (MAF ≤1% in reference databases). Homozygous and compound heterozygous pdSNVs retained after restricting the analysis to novel variants are indicated in bold.

<sup>1</sup> Amino acid changes are reported according to the MANE isoform.

<sup>2</sup> In the segregation column, children are listed sequentially after the father and the mother, according to the recruitment order. Family member carrying the variant are underlined; if the variant is homozygous, the carrier is also indicated in blue. *De novo* variants are indicated in red. Abbreviations: f, father; m, mother; a, affected; u, unaffected; d, specific learning disability; M, male; F, female.

<sup>3</sup> GnomAD pRec score: Probability that transcript falls into distribution of recessive genes (~46% o/e pLoF ratio; computed from gnomAD data). A pRec score > 0.5 indicates genes with a higher probability of intolerance to biallelic loss of function.

<sup>4</sup> High-confidence ASD/NDD gene list classification according to Supplementary Table 8.

<sup>5</sup> The PAX7 deletion identified in family 91 is reported in Table 2.

Supplementary Table 12: Rare hemizygous pdSNVs

| Chr  | Position (hg38) | Ref | Alt | Gene     | Amino acid change <sup>1</sup>     | Missense classification (MPC score) | ASD Male(s) | Segregation <sup>2</sup> | Nr hemizygotes (gnomAD non-neuro v2.1.1/v3.1.2) <sup>3</sup> | GeneTrek classification |
|------|-----------------|-----|-----|----------|------------------------------------|-------------------------------------|-------------|--------------------------|--------------------------------------------------------------|-------------------------|
| chrX | 10067293        | C   | G   | WWC3     | NM_015691.5:exon3:c.23C>G:p.T8S    | DMisA (1.009)                       | 69.3        | 69: <u>f/m/aM</u>        | 0/NF                                                         | Candidate -NDD          |
| chrX | 18941608        | A   | C   | PHKA2    | NM_000292.3:exon8:c.785T>G:p.I262S | DMisA (1.858)                       | 66.3        | 66: <u>f/m/aM</u>        | 11/15                                                        | .                       |
| chrX | 21655991        | C   | T   | KLHL34   | NM_153270.3:c.1798G>A:p.D600N      | DMisA (1.278)                       | 114.3       | 114: <u>f/m/aM</u>       | 1/NF                                                         | .                       |
| chrX | 41224766        | T   | C   | USP9X    | NM_001039591.3:c.6776T>C:p.F2259S  | DMisA (1.563)                       |             | 91: <u>m/aM/dM/aM/dM</u> | novel                                                        | HC-NDD                  |
| chrX | 41474066        | C   | G   | NYX      | NM_001378477.3:c.598C>G:p.L200V    | DMisA (1.237)                       | 51.3        | 51: <u>f/m/aM/uF</u>     | novel                                                        | Candidate -NDD          |
| chrX | 45051714        | A   | T   | KDM6A    | NM_001291415.2:c.660A>T:p.K220N    | DMisA (1.884)                       | 118.3       | 118: <u>f/m/aM/aF/uM</u> | 0/1                                                          | HC-NDD                  |
| chrX | 47626101        | G   | A   | CFP      | NM_001145252.3:c.1201C>T:p.R401C   | DMisA (1.914)                       | 53.3        | 53: <u>f/m/aM</u>        | 0/NF                                                         | .                       |
| chrX | 48601844        | G   | T   | WDR13    | NM_001347217.2:c.892G>T:p.G298W    | DMisB (2.355)                       | 15.4        | 15: <u>f/m/aM/aM</u>     | 8/3                                                          | Candidate -NDD          |
| chrX | 50086401        | G   | A   | CLCN5    | NM_001127898.4:c.1088G>A:p.R363H   | DMisA (1.583)                       | 119.3       | 119: <u>f/m/aM/aM</u>    | 0/2                                                          | Candidate -NDD          |
| chrX | 55452768        | C   | T   | MAGEH1   | NM_014061.5:c.394C>T:p.P132S       | DMisA (1.534)                       | 92.3        | 92: <u>f/m/aM/raM</u>    | novel                                                        | Candidate -NDD          |
| chrX | 65518271        | G   | C   | LAS1L    | NM_031206.7:c.1643C>G:p.S548C      | DMisA (1.057)                       | 121.4       | 121: <u>f/m/aF/aM</u>    | novel                                                        | HC-NDD                  |
| chrX | 65729651        | G   | A   | MSN      | NM_002444.3:exon4:c.406G>A:p.D136N | DMisA (1.900)                       | 92.3        | 92: <u>f/m/aM/raM</u>    | 2/NF                                                         | Candidate -NDD          |
| chrX | 69529693        | T   | C   | NALF2    | NM_015686.3:c.1156T>C:p.F386L      | DMisA (1.201)                       | 34.3        | 34: <u>f/m/aM/uF</u>     | 2/1                                                          | .                       |
| chrX | 105767516       | A   | G   | IL1RAPL2 | NM_017416.2:c.1916A>G:p.H639R      | DMisA (1.063)                       | 91.3, 91.5  | 91: <u>m/aM/dM/aM/dM</u> | 4/3                                                          | Candidate -NDD          |
| chrX | 106928284       | T   | C   | CLDN2    | NM_020384.4:c.56T>C:p.L19S         | DMisA (1.193)                       | 39.3        | 39: <u>f/m/aM</u>        | 12/2                                                         | .                       |
| chrX | 106986166       | G   | T   | MORC4    | NM_024657.5:c.343C>A:p.Q115K       | DMisA (1.083)                       | 105.3       | 105: <u>f/m/aM</u>       | 4/2                                                          | Candidate -NDD          |
| chrX | 106986167       | G   | C   | MORC4    | NM_024657.5:c.342C>G:p.S114R       | DMisA (1.151)                       | 105.3       | 105: <u>f/m/aM</u>       | 4/2                                                          | Candidate -NDD          |
| chrX | 109665485       | T   | C   | ACSL4    | NM_001318510.2:c.1325A>G:p.Y442C   | DMisA (1.635)                       | 9.3         | 9: <u>f/m/aM/dM/uF</u>   | 34/15                                                        | HC-NDD                  |
| chrX | 110317627       | G   | A   | AMMECR1  | NM_015365.3:c.445C>T:p.R149W       | DMisA (1.764)                       | 81.3        | 81: <u>f/m/aM/uM</u>     | novel                                                        | Candidate -NDD          |
| chrX | 129565827       | G   | A   | OCRL     | NM_000276.4:c.1300G>A:p.E434K      | DMisB (2.017)                       | 56.4        | 56: <u>f/m/aF/aM</u>     | novel                                                        | HC-NDD                  |
| chrX | 129788035       | G   | A   | SASH3    | NM_018990.4:c.118G>A:p.V40M        | DMisA (1.296)                       | 23.3        | 23: <u>f/m/aM/dF/uFs</u> | 1/0                                                          | .                       |
| chrX | 129793748       | G   | C   | SASH3    | NM_018990.4:c.1059G>C:p.E353D      | DMisA (1.248)                       | 5.3         | 5: <u>f/m/aM</u>         | novel                                                        | .                       |
| chrX | 134413584       | A   | T   | PHF6     | NM_001015877.2:c.512A>T:p.N171I    | DMisA (1.325)                       | 39.3        | 39: <u>f/m/aM</u>        | novel                                                        | HC-NDD                  |
| chrX | 135552001       | G   | A   | INTS6L   | NM_001351601.3:c.914G>A:p.R305Q    | DMisA (1.378)                       | 21.3        | 21: <u>f/m/aM/uM</u>     | novel                                                        | Candidate -NDD          |
| chrX | 139802242       | A   | C   | ATP11C   | NM_001353812.2:c.653T>G:p.L218R    | DMisA (1.623)                       | 47.3        | 47: <u>f/m/aM</u>        | 0/1                                                          | Candidate -NDD          |
| chrX | 153725316       | G   | A   | ABCD1    | NM_000033.4:c.50G>A:p.R17H         | DMisA (1.404)                       | 44.3        | 44: <u>f/m/aM/uF</u>     | 3/4                                                          | HC-NDD                  |
| chrX | 153785963       | G   | A   | IDH3G    | NM_004135.4:c.1091C>T:p.P364L      | DMisA (1.241)                       | 92.4        | 92: <u>f/m/aM/raM</u>    | 0/0                                                          | Candidate -NDD          |
| chrX | 153905849       | G   | A   | AVPR2    | NM_000054.7:c.343G>A:p.V115M       | DMisA (1.399)                       | 51.3        | 51: <u>f/m/aM/uF</u>     | 2/1                                                          | Candidate -NDD          |
| chrX | 153951650       | G   | A   | HCFC1    | NM_005334.3:c.5318C>T:p.A1773V     | DMisA (1.450)                       | 53.3        | 53: <u>f/m/aM</u>        | novel                                                        | HC-NDD                  |
| chrX | 154442150       | C   | T   | GDI1     | NM_001493.3:c.1031C>T:p.A344V      | DMisB (2.277)                       | 39.3        | 39: <u>f/m/aM</u>        | novel                                                        | HC-NDD                  |
| chrX | 155046562       | G   | A   | FUNDC2   | NM_023934.4:c.338G>A:p.G113E       | DMisA (1.027)                       | 20.3        | 20: <u>f/m/aM/uF</u>     | novel                                                        | .                       |
| chrX | 155077198       | A   | G   | BRCC3    | NM_001018055.3:c.224A>G:p.H75R     | DMisB (2.221)                       | 16.3, 16.4  | 16: <u>f/m/aM/aM</u>     | 0/0                                                          | .                       |

List of hemizygous pdSNVs identified in male probands and absent in unaffected brother(s).

<sup>1</sup> Amino acid changes are reported according to the MANE isoform.

<sup>2</sup> In the segregation column, children are listed sequentially after the father and the mother, according to the recruitment order. Family member carrying the variant are underlined.

Abbreviations: f, father; m, mother; r, relative (uncle); a, affected; u, unaffected; d, specific learning disability; M, male; F, female.

<sup>3</sup> Number of hemizygotes: 0, the variant is present in GnomAD but no hemizygotes are listed; NF, the variant is not found in the specific release of GnomAD; novel, the variant is absent in both GnomAD releases.



Supplementary Table 6: List of *de novo* and inherited pdSNVs in cases

| Chr  | Start (hg38) | End (hg38) | Ref | Alt | Gene (RefSeq) | Exonic/splicing | Consequence       | Amino acid change                                                                                                                                                                                                                                                                                                                                                                                                                                                                                                                                                                                                                                                                                                                                                                                                                                          | LOEUF score (gnomAD v4) | MPC score | gnomADv2.1 (genome, non neuro sample, AF popmax) | gnomADv2.1 (exome, non neuro sample, AF popmax) | gnomADv3.0 (AF total) | Family               | Genotypes           |
|------|--------------|------------|-----|-----|---------------|-----------------|-------------------|------------------------------------------------------------------------------------------------------------------------------------------------------------------------------------------------------------------------------------------------------------------------------------------------------------------------------------------------------------------------------------------------------------------------------------------------------------------------------------------------------------------------------------------------------------------------------------------------------------------------------------------------------------------------------------------------------------------------------------------------------------------------------------------------------------------------------------------------------------|-------------------------|-----------|--------------------------------------------------|-------------------------------------------------|-----------------------|----------------------|---------------------|
| chr1 | 1042075      | 1042075    | G   | A   | AGRN          | exonic          | nonsynonymous SNV | AGRN:NM_198576:exon7:c.G1297A:p.G433R                                                                                                                                                                                                                                                                                                                                                                                                                                                                                                                                                                                                                                                                                                                                                                                                                      | .                       | 1.405     | 0.0002                                           | 9.91E-05                                        | 2.09E-05              | Fam91_m_aM_dM_aM_dM  | 0/1;0/1;0/0;0/0;0/0 |
| chr1 | 1232763      | 1232763    | G   | A   | B3GALT6       | exonic          | nonsynonymous SNV | B3GALT6:NM_080605:exon1:c.G485A:p.R162Q<br>INTS11:NM_001256462:exon6:c.G445A:p.E149K,INTS11:NM_001256463:exon6:c.G436A:p.E146K,INTS11:NM_017871:exon8:c.G739A:p.E247K,INTS11:NM_001256460:exon9:c.G652A:p.E218K,INTS11:NM_001256456:exon10:c.G757A:p.E253K                                                                                                                                                                                                                                                                                                                                                                                                                                                                                                                                                                                                 | .                       | 1.982     | 0.0002                                           | 0.0004                                          | 0.0004                | Fam12_f_m_aM_uM_aM   | 0/0;0/1;0/1;0/0;0/1 |
| chr1 | 1314329      | 1314329    | C   | T   | INTS11        | exonic          | nonsynonymous SNV | MIB2:NM_001170686:exon3:c.G227A:p.G76D, MIB2:NM_01170687:exon3:c.G185A:p.G62D, MIB2:NM_001170688:exon3:c.G398A:p.G133D, MIB2:NM_001170689:exon3:c.G53A:p.G18D, MIB2:NM_080875:exon3:c.G227A:p.G76D                                                                                                                                                                                                                                                                                                                                                                                                                                                                                                                                                                                                                                                         | .                       | 1.568     | .                                                | 6.94E-05                                        | 6.98E-06              | Fam30_f_m_aM_uM      | 0/0;0/1;0/1;0/1     |
| chr1 | 1623505      | 1623505    | G   | A   | MIB2          | exonic          | nonsynonymous SNV | MIB2:NM_001170686:exon4:c.C521T:p.T174M, MIB2:NM_001170687:exon4:c.C479T:p.T160M, MIB2:NM_001170688:exon4:c.C692T:p.T231M, MIB2:NM_001170689:exon4:c.C347T:p.T116M, MIB2:NM_080875:exon4:c.C521T:p.T174M                                                                                                                                                                                                                                                                                                                                                                                                                                                                                                                                                                                                                                                   | .                       | 1.502     | .                                                | .                                               | .                     | Fam56_f_m_aF_aM      | 0/0;0/1;0/1;0/0     |
| chr1 | 1623873      | 1623873    | C   | T   | MIB2          | exonic          | nonsynonymous SNV | MIB2:NM_001170688:exon15:c.G2323C:p.D775H, MIB2:NM_001170689:exon15:c.G1978C:p.D660H, MIB2:NM_001170686:exon16:c.G2335C:p.D779H, MIB2:NM_001170687:exon16:c.G2305C:p.D769H, MIB2:NM_080875:exon16:c.G2347C:p.D783H                                                                                                                                                                                                                                                                                                                                                                                                                                                                                                                                                                                                                                         | .                       | 1.319     | .                                                | 7.76E-05                                        | 6.98E-06              | Fam108_f_m_aM        | 0/0;0/1;0/1         |
| chr1 | 1628693      | 1628693    | G   | C   | MIB2          | exonic          | nonsynonymous SNV | GABRD:NM_000815:exon8:c.G970A:p.A324T                                                                                                                                                                                                                                                                                                                                                                                                                                                                                                                                                                                                                                                                                                                                                                                                                      | .                       | 1.545     | 7.35E-05                                         | 0.0005                                          | 0.0002                | Fam110_f_m_aM_aM_uMs | 0/0;0/1;0/1;0/1;0/0 |
| chr1 | 2029673      | 2029673    | G   | A   | GABRD         | exonic          | nonsynonymous SNV | PRKCZ:NM_001033581:exon11:c.A808G:p.I270V, PRKCZ:NM_001033582:exon11:c.A808G:p.I270V, PRKCZ:NM_001242874:exon11:c.A1045G:p.I349V, PRKCZ:NM_001350803:exon11:c.A832G:p.I278V, PRKCZ:NM_001350805:exon11:c.A646G:p.I216V, PRKCZ:NM_001350806:exon11:c.A646G:p.I216V, PRKCZ:NM_001350804:exon12:c.A832G:p.I278V, PRKCZ:NM_002744:exon14:c.A1357G:p.I453V                                                                                                                                                                                                                                                                                                                                                                                                                                                                                                      | .                       | 1.8       | .                                                | .                                               | .                     | Fam88_f_m_aF         | 0/1;0/0;0/1         |
| chr1 | 2173968      | 2173968    | A   | G   | PRKCZ         | exonic          | nonsynonymous SNV | PANK4:NM_018216:exon1:c.G28A:p.G10R                                                                                                                                                                                                                                                                                                                                                                                                                                                                                                                                                                                                                                                                                                                                                                                                                        | .                       | 1.049     | 7.34E-05                                         | 3.37E-05                                        | 3.49E-05              | Fam94_f_m_aM         | 0/1;0/0;0/1         |
| chr1 | 2526560      | 2526560    | C   | T   | PANK4         | exonic          | nonsynonymous SNV | AJAP1:NM_001042478:exon1:c.G23A:p.G8E, AJAP1:NM_018836:exon1:c.G23A:p.G8E                                                                                                                                                                                                                                                                                                                                                                                                                                                                                                                                                                                                                                                                                                                                                                                  | .                       | 1.037     | .                                                | .                                               | 6.98E-06              | Fam6_f_m_aM          | 0/1;0/0;0/1         |
| chr1 | 4655448      | 4655448    | G   | A   | AJAP1         | exonic          | nonsynonymous SNV | KCNAB2:NM_001199862:exon2:c.C67G:p.L23V                                                                                                                                                                                                                                                                                                                                                                                                                                                                                                                                                                                                                                                                                                                                                                                                                    | .                       | 1.062     | 0.0003                                           | 1.29E-05                                        | 1.40E-05              | Fam52_f_m_aM         | 0/0;0/1;0/1         |
| chr1 | 6051603      | 6051603    | C   | G   | KCNAB2        | exonic          | nonsynonymous SNV | HES3:NM_001024598:exon4:c.G223C:p.G75R                                                                                                                                                                                                                                                                                                                                                                                                                                                                                                                                                                                                                                                                                                                                                                                                                     | .                       | 1.026     | .                                                | .                                               | .                     | Fam12_f_m_aM_uM_aM   | 0/1;0/0;0/1;0/1;0/1 |
| chr1 | 6245169      | 6245169    | G   | C   | HES3          | exonic          | nonsynonymous SNV | GPR153:NM_207370:exon6:c.C1771G:p.P591A                                                                                                                                                                                                                                                                                                                                                                                                                                                                                                                                                                                                                                                                                                                                                                                                                    | .                       | 2.081     | .                                                | .                                               | .                     | Fam31_f_m_aM_uF      | 0/1;0/0;0/1;0/0     |
| chr1 | 6249397      | 6249397    | G   | C   | GPR153        | exonic          | nonsynonymous SNV | GPR153:NM_207370:exon3:c.G652A:p.V218M                                                                                                                                                                                                                                                                                                                                                                                                                                                                                                                                                                                                                                                                                                                                                                                                                     | .                       | 1.007     | .                                                | .                                               | .                     | Fam57_f_m_aM_uF      | 0/0;0/1;0/1;0/0     |
| chr1 | 6253852      | 6253852    | C   | T   | GPR153        | exonic          | nonsynonymous SNV | GPR153:NM_207370:exon3:c.C613T:p.R205C                                                                                                                                                                                                                                                                                                                                                                                                                                                                                                                                                                                                                                                                                                                                                                                                                     | .                       | 1.034     | 0.0002                                           | 0.0001                                          | 9.07E-05              | Fam97_f_m_aM_aF      | 0/1;0/0;0/0;0/1     |
| chr1 | 6253891      | 6253891    | G   | A   | GPR153        | exonic          | nonsynonymous SNV | HES2:NM_019089:exon4:c.C479T:p.P160L                                                                                                                                                                                                                                                                                                                                                                                                                                                                                                                                                                                                                                                                                                                                                                                                                       | .                       | 1.084     | 0.0004                                           | 0.0004                                          | 0.0002                | Fam18_f_m_aM_uF      | 0/0;0/1;0/1;0/1     |
| chr1 | 6418916      | 6418916    | G   | A   | HES2          | exonic          | nonsynonymous SNV | CAMTA1:NM_001349608:exon8:c.A1984T:p.M662L, CAMTA1:NM_001349612:exon8:c.A1984T:p.M662L, CAMTA1:NM_001349609:exon9:c.A2074T:p.M692L, CAMTA1:NM_001349610:exon9:c.A2074T:p.M692L, CAMTA1:NM_015215:exon9:c.A2074T:p.M692L                                                                                                                                                                                                                                                                                                                                                                                                                                                                                                                                                                                                                                    | .                       | 1.77      | .                                                | .                                               | 6.98E-06              | Fam60_f_m_aF         | 0/1;0/0;0/1         |
| chr1 | 7664621      | 7664621    | A   | T   | CAMTA1        | exonic          | nonsynonymous SNV | CAMTA1:NM_001349613:exon5:c.A755G:p.K252R, CAMTA1:NM_001349615:exon5:c.A698G:p.K233R, CAMTA1:NM_001349616:exon5:c.A698G:p.K233R, CAMTA1:NM_001349618:exon5:c.A698G:p.K233R, CAMTA1:NM_001349619:exon5:c.A698G:p.K233R, CAMTA1:NM_001349621:exon5:c.A698G:p.K233R, CAMTA1:NM_001349622:exon5:c.A698G:p.K233R, CAMTA1:NM_001349624:exon5:c.A698G:p.K233R, CAMTA1:NM_001349626:exon5:c.A698G:p.K233R, CAMTA1:NM_001349614:exon7:c.A698G:p.K233R, CAMTA1:NM_01349617:exon7:c.A698G:p.K233R, CAMTA1:NM_001349620:exon7:c.A698G:p.K233R, CAMTA1:NM_001349623:exon7:c.A698G:p.K233R, CAMTA1:NM_001349625:exon7:c.A698G:p.K233R, CAMTA1:NM_001349608:exon14:c.A3536G:p.K1179R, CAMTA1:NM_001349612:exon14:c.A3536G:p.K1179R, CAMTA1:NM_001349609:exon15:c.A3626G:p.K1209R, CAMTA1:NM_001349610:exon15:c.A3626G:p.K1209R, CAMTA1:NM_015215:exon15:c.A3626G:p.K1209R | .                       | 1.139     | .                                                | 3.28E-05                                        | 6.98E-06              | Fam121_f_m_aF_aM     | 0/0;0/1;0/0;0/1     |
| chr1 | 7737538      | 7737538    | A   | G   | CAMTA1        | exonic          | nonsynonymous SNV | PIK3CD:NM_001350235:exon8:c.C1005A:p.S335R, PIK3CD:NM_001350234:exon9:c.C1092A:p.S364R, PIK3CD:NM_005026:exon9:c.C1092A:p.S364R                                                                                                                                                                                                                                                                                                                                                                                                                                                                                                                                                                                                                                                                                                                            | .                       | 1.245     | 7.34E-05                                         | 0.0003                                          | 0.0002                | Fam18_f_m_aM_uF      | 0/1;0/0;0/1;0/1     |
| chr1 | 9718765      | 9718765    | C   | A   | PIK3CD        | exonic          | nonsynonymous SNV | KIF1B:NM_001365953:exon21:c.C3352T:p.Q1118X, KIF1B:NM_183416:exon21:c.C3352T:p.Q1118X                                                                                                                                                                                                                                                                                                                                                                                                                                                                                                                                                                                                                                                                                                                                                                      | .                       | 1.324     | .                                                | 1.12E-05                                        | 1.40E-05              | Fam53_f_m_aM         | 0/1;0/0;0/1         |
| chr1 | 10304537     | 10304537   | C   | T   | KIF1B         | exonic          | stopgain          | SRM:NM_003132:exon7:c.G781A:p.E261K                                                                                                                                                                                                                                                                                                                                                                                                                                                                                                                                                                                                                                                                                                                                                                                                                        | 0.385                   | .         | .                                                | .                                               | .                     | Fam4_f_m_aM          | 0/1;0/0;0/1         |
| chr1 | 11055069     | 11055069   | C   | T   | SRM           | exonic          | nonsynonymous SNV |                                                                                                                                                                                                                                                                                                                                                                                                                                                                                                                                                                                                                                                                                                                                                                                                                                                            | .                       | 1.181     | 0.0005                                           | 0.0005                                          | 0.0003                | Fam88_f_m_aF         | 0/1;0/0;0/1         |

|      |          |          |   |   |           |          |                   |                                                                                                                                                                                                                                                                                                                                                                                                                                                                                                                                                                                                                                                                         |       |   |          |          |          |                     |                        |                         |                 |
|------|----------|----------|---|---|-----------|----------|-------------------|-------------------------------------------------------------------------------------------------------------------------------------------------------------------------------------------------------------------------------------------------------------------------------------------------------------------------------------------------------------------------------------------------------------------------------------------------------------------------------------------------------------------------------------------------------------------------------------------------------------------------------------------------------------------------|-------|---|----------|----------|----------|---------------------|------------------------|-------------------------|-----------------|
| chr1 | 11069564 | 11069564 | A | G | EXOSC10   | exonic   | nonsynonymous SNV | EXOSC10:NM_002685:exon21:c.T2408C;p.F803S,EXOSC10:NM_001001998:exon22:c.T2483C;p.F828S                                                                                                                                                                                                                                                                                                                                                                                                                                                                                                                                                                                  | 1.115 | . | .        | .        | .        | .                   | .                      | Fam37_f_m_aF_uM         | 0/1;0/0;0/1;0/1 |
| chr1 | 11133109 | 11133109 | C | T | MTOR      | exonic   | nonsynonymous SNV | MTOR:NM_004958:exon38:c.G5335A;p.A1779T                                                                                                                                                                                                                                                                                                                                                                                                                                                                                                                                                                                                                                 | 1.201 | . | .        | 3.28E-05 | .        | .                   | .                      | Fam60_f_m_aF            | 0/1;0/0;0/1     |
| chr1 | 11515488 | 11515488 | G | A | DISP3     | exonic   | nonsynonymous SNV | DISP3:NM_020780:exon5:c.G1573A;p.V525M                                                                                                                                                                                                                                                                                                                                                                                                                                                                                                                                                                                                                                  | 1.15  | . | 0.0003   | 4.64E-05 | 6.98E-05 | .                   | Fam68_f_m_aF_uF_uM     | 0/1;0/0;0/1;0/0;0/0     |                 |
| chr1 | 11649833 | 11649833 | C | T | FBXO2     | exonic   | nonsynonymous SNV | FBXO2:NM_012168:exon4:c.G563A;p.G188D                                                                                                                                                                                                                                                                                                                                                                                                                                                                                                                                                                                                                                   | 1.141 | . | .        | .        | .        | .                   | Fam56_f_m_aF_aM        | 0/1;0/0;0/1;0/1         |                 |
| chr1 | 12192518 | 12192518 | A | G | TNFRSF1B  | exonic   | nonsynonymous SNV | TNFRSF1B:NM_001066:exon5:c.A545G;p.H182R<br>KAZN:NM_001017999:exon4:c.G347A;p.R116H,KAZN:NM_001018000:exon4:c.G611A;p.R204H,KAZN:NM_001018001:exon4:c.G347A;p.R116H,KAZN:NM_001370229:exon4:c.G602A;p.R201H,KAZN:NM_001370230:exon4:c.G434A;p.R145H,KAZN:NM_015209:exon4:c.G629A;p.R210H,KAZN:NM_201628:exon4:c.G629A;p.R210H,KAZN:NM_001370231:exon5:c.G626A;p.R209H                                                                                                                                                                                                                                                                                                   | 1.221 | . | .        | .        | .        | .                   | Fam99_f_m_aM_aM        | 0/1;0/0;0/1;0/0         |                 |
| chr1 | 15044062 | 15044062 | G | A | KAZN      | exonic   | nonsynonymous SNV | 602A;p.R201H,KAZN:NM_001370230:exon4:c.G434A;p.R145H,KAZN:NM_015209:exon4:c.G629A;p.R210H,KAZN:NM_201628:exon4:c.G629A;p.R210H,KAZN:NM_001370231:exon5:c.G626A;p.R209H                                                                                                                                                                                                                                                                                                                                                                                                                                                                                                  | 1.9   | . | 7.37E-05 | 5.65E-05 | 9.08E-05 | .                   | Fam72_f_m_aF_uF        | 0/1;0/0;0/1;0/1         |                 |
| chr1 | 15578976 | 15578976 | G | T | AGMAT     | exonic   | nonsynonymous SNV | AGMAT:NM_024758:exon4:c.C603A;p.H201Q                                                                                                                                                                                                                                                                                                                                                                                                                                                                                                                                                                                                                                   | 1.034 | . | 0.001    | 0.0008   | .        | 0.0006              | Fam29_f_m_aF_uM        | 0/0;0/1;0/1;0/0         |                 |
| chr1 | 15617745 | 15617745 | C | G | DDI2      | exonic   | nonsynonymous SNV | DDI2:NM_032341:exon1:c.C75G;p.F25L                                                                                                                                                                                                                                                                                                                                                                                                                                                                                                                                                                                                                                      | 1.131 | . | .        | .        | .        | .                   | Fam89_f_m_aM           | 0/1;0/0;0/1             |                 |
| chr1 | 15930486 | 15930486 | C | T | SPEN      | exonic   | nonsynonymous SNV | SPEN:NM_015001:exon11:c.C4246T;p.R1416C                                                                                                                                                                                                                                                                                                                                                                                                                                                                                                                                                                                                                                 | 1.011 | . | .        | 3.27E-05 | .        | .                   | Fam89_f_m_aM           | 0/1;0/0;0/1             |                 |
| chr1 | 15946317 | 15946317 | C | G | ZBTB17    | splicing | .                 | .                                                                                                                                                                                                                                                                                                                                                                                                                                                                                                                                                                                                                                                                       | 0.472 | . | .        | .        | 0.0002   | 4.19E-05            | Fam51_f_m_aM_uF        | 0/1;0/0;0/1;0/1         |                 |
| chr1 | 16251656 | 16251656 | G | A | FBXO42    | exonic   | nonsynonymous SNV | FBXO42:NM_018994:exon10:c.C1168T;p.R390C<br>ARHGEF10L:NM_001319838:exon4:c.C427T;p.R143C,ARHG EF10L:NM_001328124:exon4:c.C427T;p.R143C,ARHGGEF10L:NM_001011722:exon10:c.C976T;p.R326C,ARHGEF10L:NM_001319837:exon10:c.C976T;p.R326C,ARHGEF10L:NM_018125:exon12:c.C1093T;p.R365C<br>ARHGEF10L:NM_001319838:exon18:c.C2803T;p.R935C,AR HGEF10L:NM_001328124:exon21:c.C3028T;p.R1010C,ARH GEF10L:NM_001319837:exon26:c.C3562T;p.R1188C,ARHG EF10L:NM_001011722:exon27:c.C3577T;p.R1193C,ARHGGE F10L:NM_018125:exon29:c.C3694T;p.R1232C                                                                                                                                     | 1.05  | . | 7.35E-05 | 0.0002   | 2.10E-05 | .                   | Fam102_f_m_aM          | 0/1;0/0;0/1             |                 |
| chr1 | 17623068 | 17623068 | C | T | ARHGEF10L | exonic   | nonsynonymous SNV | ARHGEF10L:NM_001319838:exon18:c.C2803T;p.R935C,AR HGEF10L:NM_001328124:exon21:c.C3028T;p.R1010C,ARH GEF10L:NM_001319837:exon26:c.C3562T;p.R1188C,ARHG EF10L:NM_001011722:exon27:c.C3577T;p.R1193C,ARHGGE F10L:NM_018125:exon29:c.C3694T;p.R1232C                                                                                                                                                                                                                                                                                                                                                                                                                        | 1.681 | . | .        | 0.0002   | 5.58E-05 | .                   | Fam90_f_m_aF_dM        | 0/0;0/1;0/1;0/1         |                 |
| chr1 | 17697234 | 17697234 | C | T | ARHGEF10L | exonic   | nonsynonymous SNV | ARHGEF10L:NM_001319837:exon26:c.C3562T;p.R1188C,ARHG EF10L:NM_001011722:exon27:c.C3577T;p.R1193C,ARHGGE F10L:NM_018125:exon29:c.C3694T;p.R1232C                                                                                                                                                                                                                                                                                                                                                                                                                                                                                                                         | 1.111 | . | 0.0003   | 0.0003   | 0.0001   | .                   | Fam28_f_m_aF_uF        | 0/0;0/1;0/1;0/0         |                 |
| chr1 | 18691870 | 18691870 | G | A | PAX7      | exonic   | nonsynonymous SNV | PAX7:NM_001135254:exon5:c.G703A;p.A235T,PAX7:NM_0 02584:exon5:c.G703A;p.A235T,PAX7:NM_013945:exon5:c. G697A;p.A233T<br>PAX7:NM_001135254:exon7:c.C1063T;p.R355C,PAX7:NM_ 002584:exon7:c.C1063T;p.R355C,PAX7:NM_013945:exon7: c.C1057T;p.R353C                                                                                                                                                                                                                                                                                                                                                                                                                           | 1.067 | . | 0.0009   | 0.0009   | 0.0003   | Fam91_m_aM_dM_aM_dM | 0/1;1;0/0;0/0;0/0      |                         |                 |
| chr1 | 18703204 | 18703204 | C | T | PAX7      | exonic   | nonsynonymous SNV | PAX7:NM_001135254:exon7:c.C1063T;p.R355C,PAX7:NM_ 002584:exon7:c.C1063T;p.R355C,PAX7:NM_013945:exon7: c.C1057T;p.R353C                                                                                                                                                                                                                                                                                                                                                                                                                                                                                                                                                  | 1.466 | . | .        | 3.27E-05 | .        | .                   | Fam118_f_m_aM_aF_uM    | 0/1;0/0;0/1;0/0;0/1     |                 |
| chr1 | 19095606 | 19095606 | C | T | UBR4      | exonic   | nonsynonymous SNV | UBR4:NM_020765:exon93:c.G13565A;p.R4522Q                                                                                                                                                                                                                                                                                                                                                                                                                                                                                                                                                                                                                                | 1.927 | . | 0.0001   | 0.0001   | 8.38E-05 | .                   | Fam75_f_m_aM           | 0/0;0/1;0/1             |                 |
| chr1 | 19105073 | 19105073 | G | A | UBR4      | exonic   | nonsynonymous SNV | UBR4:NM_020765:exon85:c.C12620T;p.P4207L                                                                                                                                                                                                                                                                                                                                                                                                                                                                                                                                                                                                                                | 1.82  | . | 0.0003   | 0.0008   | 0.0001   | .                   | Fam6_f_m_aM            | 0/0;0/1;0/1             |                 |
| chr1 | 19317726 | 19317726 | G | A | SLC66A1   | exonic   | nonsynonymous SNV | SLC66A1:NM_001040125:exon2:c.G49A;p.G175,SLC66A1:N M_017765:exon3:c.G49A;p.G175<br>CAPZB:NM_001206540:exon5:c.G460A;p.V154I,CAPZB:NM _001282162:exon5:c.G547A;p.V183I,CAPZB:NM_004930:e xon5:c.G460A;p.V154I,CAPZB:NM_001206541:exon6:c.G53 8A;p.V180I                                                                                                                                                                                                                                                                                                                                                                                                                  | 1.064 | . | .        | 0.0003   | 5.58E-05 | .                   | Fam92_f_m_aM_raM       | 0/0;0/0;0/0;0/1         |                 |
| chr1 | 19357433 | 19357433 | C | T | CAPZB     | exonic   | nonsynonymous SNV | SLC66A1:NM_001040125:exon2:c.G49A;p.G175,SLC66A1:N M_017765:exon3:c.G49A;p.G175<br>CAPZB:NM_001206540:exon5:c.G460A;p.V154I,CAPZB:NM _001282162:exon5:c.G547A;p.V183I,CAPZB:NM_004930:e xon5:c.G460A;p.V154I,CAPZB:NM_001206541:exon6:c.G53 8A;p.V180I                                                                                                                                                                                                                                                                                                                                                                                                                  | 2.298 | . | .        | 0.0005   | .        | .                   | Fam97_f_m_aM_aF        | 0/0;0/1;0/1;0/0         |                 |
| chr1 | 19666013 | 19666013 | C | G | HTR6      | exonic   | nonsynonymous SNV | HTR6:NM_000871:exon1:c.C260G;p.A87G                                                                                                                                                                                                                                                                                                                                                                                                                                                                                                                                                                                                                                     | 1.112 | . | .        | 2.24E-05 | .        | .                   | Fam77_f_m_aM_aF_uM_uFs | 0/0;0/1;0/0;0/1;0/1;0/1 |                 |
| chr1 | 19907682 | 19907682 | G | T | OTUD3     | exonic   | nonsynonymous SNV | OTUD3:NM_015207:exon8:c.G1133T;p.R378I                                                                                                                                                                                                                                                                                                                                                                                                                                                                                                                                                                                                                                  | 1.247 | . | .        | .        | .        | .                   | Fam107_f_m_aM          | 0/1;0/0;0/1             |                 |
| chr1 | 20672181 | 20672181 | C | G | KIF17     | exonic   | nonsynonymous SNV | KIF17:NM_001122819:exon12:c.G2479C;p.V827L,KIF17:N M_001287212:exon12:c.G2179C;p.V727L,KIF17:NM_02081 6:exon12:c.G2479C;p.V827L<br>EIF4G3:NM_003760:exon15:c.A2311T;p.N771Y,EIF4G3:NM _001198801:exon18:c.A2419T;p.N807Y,EIF4G3:NM_00119 8802:exon18:c.A2329T;p.N777Y<br>ECE1:NM_001113347:exon7:c.G1039A;p.V347M,ECE1:NM _001113349:exon8:c.G1066A;p.V356M,ECE1:NM_0011133 48:exon9:c.G1027A;p.V343M,ECE1:NM_001397:exon9:c.G 1075A;p.V359M<br>USP48:NM_001350164:exon22:c.G2597A;p.R866H,USP48: NM_001350166:exon23:c.G2792A;p.R931H,USP48:NM_00 1350167:exon23:c.G2795A;p.R932H,USP48:NM_00135016 8:exon23:c.G2795A;p.R932H,USP48:NM_032236:exon23:c. G2798A;p.R933H | 1.098 | . | .        | 3.28E-05 | .        | .                   | Fam43_f_m_aM           | 0/0;0/1;0/1             |                 |
| chr1 | 20879466 | 20879466 | T | A | EIF4G3    | exonic   | nonsynonymous SNV | KIF17:NM_001122819:exon12:c.G2479C;p.V827L,KIF17:N M_001287212:exon12:c.G2179C;p.V727L,KIF17:NM_02081 6:exon12:c.G2479C;p.V827L<br>EIF4G3:NM_003760:exon15:c.A2311T;p.N771Y,EIF4G3:NM _001198801:exon18:c.A2419T;p.N807Y,EIF4G3:NM_00119 8802:exon18:c.A2329T;p.N777Y<br>ECE1:NM_001113347:exon7:c.G1039A;p.V347M,ECE1:NM _001113349:exon8:c.G1066A;p.V356M,ECE1:NM_0011133 48:exon9:c.G1027A;p.V343M,ECE1:NM_001397:exon9:c.G 1075A;p.V359M<br>USP48:NM_001350164:exon22:c.G2597A;p.R866H,USP48: NM_001350166:exon23:c.G2792A;p.R931H,USP48:NM_00 1350167:exon23:c.G2795A;p.R932H,USP48:NM_00135016 8:exon23:c.G2795A;p.R932H,USP48:NM_032236:exon23:c. G2798A;p.R933H | 1.797 | . | .        | 1.24E-05 | .        | .                   | Fam47_f_m_aM           | 0/0;0/1;0/1             |                 |
| chr1 | 21247309 | 21247309 | C | T | ECE1      | exonic   | nonsynonymous SNV | KIF17:NM_001122819:exon12:c.G2479C;p.V827L,KIF17:N M_001287212:exon12:c.G2179C;p.V727L,KIF17:NM_02081 6:exon12:c.G2479C;p.V827L<br>EIF4G3:NM_003760:exon15:c.A2311T;p.N771Y,EIF4G3:NM _001198801:exon18:c.A2419T;p.N807Y,EIF4G3:NM_00119 8802:exon18:c.A2329T;p.N777Y<br>ECE1:NM_001113347:exon7:c.G1039A;p.V347M,ECE1:NM _001113349:exon8:c.G1066A;p.V356M,ECE1:NM_0011133 48:exon9:c.G1027A;p.V343M,ECE1:NM_001397:exon9:c.G 1075A;p.V359M<br>USP48:NM_001350164:exon22:c.G2597A;p.R866H,USP48: NM_001350166:exon23:c.G2792A;p.R931H,USP48:NM_00 1350167:exon23:c.G2795A;p.R932H,USP48:NM_00135016 8:exon23:c.G2795A;p.R932H,USP48:NM_032236:exon23:c. G2798A;p.R933H | 1.512 | . | .        | 6.17E-05 | .        | .                   | Fam26_f_m_aM_uM        | 0/0;0/1;0/1;0/0         |                 |
| chr1 | 21695151 | 21695151 | C | T | USP48     | exonic   | nonsynonymous SNV | KIF17:NM_001122819:exon12:c.G2479C;p.V827L,KIF17:N M_001287212:exon12:c.G2179C;p.V727L,KIF17:NM_02081 6:exon12:c.G2479C;p.V827L<br>EIF4G3:NM_003760:exon15:c.A2311T;p.N771Y,EIF4G3:NM _001198801:exon18:c.A2419T;p.N807Y,EIF4G3:NM_00119 8802:exon18:c.A2329T;p.N777Y<br>ECE1:NM_001113347:exon7:c.G1039A;p.V347M,ECE1:NM _001113349:exon8:c.G1066A;p.V356M,ECE1:NM_0011133 48:exon9:c.G1027A;p.V343M,ECE1:NM_001397:exon9:c.G 1075A;p.V359M<br>USP48:NM_001350164:exon22:c.G2597A;p.R866H,USP48: NM_001350166:exon23:c.G2792A;p.R931H,USP48:NM_00 1350167:exon23:c.G2795A;p.R932H,USP48:NM_00135016 8:exon23:c.G2795A;p.R932H,USP48:NM_032236:exon23:c. G2798A;p.R933H | 2.516 | . | .        | .        | .        | .                   | Fam66_f_m_aM           | 0/0;0/1;0/1             |                 |
| chr1 | 22129640 | 22129640 | C | T | WNT4      | exonic   | nonsynonymous SNV | WNT4:NM_030761:exon2:c.G289A;p.V97I                                                                                                                                                                                                                                                                                                                                                                                                                                                                                                                                                                                                                                     | 1.102 | . | .        | 0.0001   | .        | .                   | Fam83_f_m_aF           | 0/0;0/1;0/1             |                 |
| chr1 | 22129681 | 22129681 | C | T | WNT4      | exonic   | nonsynonymous SNV | WNT4:NM_030761:exon2:c.G248A;p.R83Q<br>EPHB2:NM_001309192:exon5:c.C980T;p.A327V,EPHB2:NM _001309193:exon5:c.C980T;p.A327V,EPHB2:NM_004442:e xon5:c.C980T;p.A327V,EPHB2:NM_017449:exon5:c.C980T: p.A327V<br>KDM1A:NM_001363654:exon12:c.C1538T;p.A513V,KDM1A :NM_015013:exon12:c.C1538T;p.A513V,KDM1A:NM_0010 09999:exon14:c.C1610T;p.A537V<br>PDIK1L:NM_001243532:exon2:c.G127A;p.A43T,PDIK1L:NM _152835:exon2:c.G127A;p.A43T,PDIK1L:NM_001243533:e xon3:c.G127A;p.A43T                                                                                                                                                                                                 | 1.289 | . | 7.35E-05 | 6.56E-05 | 1.40E-05 | .                   | Fam94_f_m_aM           | 0/1;0/0;0/1             |                 |
| chr1 | 22864889 | 22864889 | C | T | EPHB2     | exonic   | nonsynonymous SNV | EPHB2:NM_001309192:exon5:c.C980T;p.A327V,EPHB2:NM _001309193:exon5:c.C980T;p.A327V,EPHB2:NM_004442:e xon5:c.C980T;p.A327V,EPHB2:NM_017449:exon5:c.C980T: p.A327V<br>KDM1A:NM_001363654:exon12:c.C1538T;p.A513V,KDM1A :NM_015013:exon12:c.C1538T;p.A513V,KDM1A:NM_0010 09999:exon14:c.C1610T;p.A537V<br>PDIK1L:NM_001243532:exon2:c.G127A;p.A43T,PDIK1L:NM _152835:exon2:c.G127A;p.A43T,PDIK1L:NM_001243533:e xon3:c.G127A;p.A43T                                                                                                                                                                                                                                        | 1.293 | . | .        | 0.0002   | 1.40E-05 | .                   | Fam47_f_m_aM           | 0/0;0/1;0/1             |                 |
| chr1 | 23072185 | 23072185 | C | T | KDM1A     | exonic   | nonsynonymous SNV | EPHB2:NM_001309192:exon5:c.C980T;p.A327V,EPHB2:NM _001309193:exon5:c.C980T;p.A327V,EPHB2:NM_004442:e xon5:c.C980T;p.A327V,EPHB2:NM_017449:exon5:c.C980T: p.A327V<br>KDM1A:NM_001363654:exon12:c.C1538T;p.A513V,KDM1A :NM_015013:exon12:c.C1538T;p.A513V,KDM1A:NM_0010 09999:exon14:c.C1610T;p.A537V<br>PDIK1L:NM_001243532:exon2:c.G127A;p.A43T,PDIK1L:NM _152835:exon2:c.G127A;p.A43T,PDIK1L:NM_001243533:e xon3:c.G127A;p.A43T                                                                                                                                                                                                                                        | 1.645 | . | 7.34E-05 | 0.0002   | 0.0001   | .                   | Fam118_f_m_aM_aF_uM    | 0/1;0/0;0/1;0/0;0/1     |                 |
| chr1 | 26114435 | 26114435 | G | A | PDIK1L    | exonic   | nonsynonymous SNV | EPHB2:NM_001309192:exon5:c.C980T;p.A327V,EPHB2:NM _001309193:exon5:c.C980T;p.A327V,EPHB2:NM_004442:e xon5:c.C980T;p.A327V,EPHB2:NM_017449:exon5:c.C980T: p.A327V<br>KDM1A:NM_001363654:exon12:c.C1538T;p.A513V,KDM1A :NM_015013:exon12:c.C1538T;p.A513V,KDM1A:NM_0010 09999:exon14:c.C1610T;p.A537V<br>PDIK1L:NM_001243532:exon2:c.G127A;p.A43T,PDIK1L:NM _152835:exon2:c.G127A;p.A43T,PDIK1L:NM_001243533:e xon3:c.G127A;p.A43T                                                                                                                                                                                                                                        | 1.081 | . | .        | .        | .        | .                   | Fam112_f_m_aM          | 0/1;0/0;0/1             |                 |
| chr1 | 26950738 | 26950738 | G | A | KDF1      | exonic   | nonsynonymous SNV | KDF1:NM_152365:exon3:c.C1058T;p.S353F                                                                                                                                                                                                                                                                                                                                                                                                                                                                                                                                                                                                                                   | 1.036 | . | .        | .        | .        | .                   | Fam81_f_m_aM_uM        | 0/0;0/0;0/1;0/0         |                 |
| chr1 | 27006417 | 27006417 | G | A | TENT5B    | exonic   | nonsynonymous SNV | TENT5B:NM_052943:exon2:c.C805T;p.R269C                                                                                                                                                                                                                                                                                                                                                                                                                                                                                                                                                                                                                                  | 1.342 | . | .        | .        | .        | .                   | Fam79_f_m_aM_uM        | 0/1;0/0;0/1;0/1         |                 |
| chr1 | 27107758 | 27107758 | T | C | SLC9A1    | exonic   | nonsynonymous SNV | SLC9A1:NM_003047:exon4:c.A1172G;p.E391G                                                                                                                                                                                                                                                                                                                                                                                                                                                                                                                                                                                                                                 | 2.299 | . | .        | .        | .        | .                   | Fam98_f_m_aM           | 0/0;0/0;0/1             |                 |

|      |          |          |   |   |          |        |                   |                                                                                                                                                                                                                                                                                              |       |          |          |          |                    |                     |
|------|----------|----------|---|---|----------|--------|-------------------|----------------------------------------------------------------------------------------------------------------------------------------------------------------------------------------------------------------------------------------------------------------------------------------------|-------|----------|----------|----------|--------------------|---------------------|
| chr1 | 27109732 | 27109732 | C | T | SLC9A1   | exonic | nonsynonymous SNV | SLC9A1:NM_003047:exon3:c.G859A:p.G2875                                                                                                                                                                                                                                                       | 1.005 | 0.0003   | 0.0004   | 0.0003   | Fam92_f_m_aM_raM   | 0/0;0/1;0/1;0/0     |
| chr1 | 27547531 | 27547531 | G | A | AHDC1    | exonic | nonsynonymous SNV | AHDC1:NM_001029882:exon6:c.C4585T:p.R1529C                                                                                                                                                                                                                                                   | 1.661 | 0.0006   | 0.0006   | 0.0003   | Fam5_f_m_aM        | 0/0;0/1;0/1         |
| chr1 | 27547531 | 27547531 | G | A | AHDC1    | exonic | nonsynonymous SNV | AHDC1:NM_001029882:exon6:c.C4585T:p.R1529C                                                                                                                                                                                                                                                   | 1.661 | 0.0006   | 0.0006   | 0.0003   | Fam75_f_m_aM       | 0/1;0/0;0/1         |
| chr1 | 27549810 | 27549810 | G | A | AHDC1    | exonic | nonsynonymous SNV | AHDC1:NM_001029882:exon6:c.C2306T:p.A769V                                                                                                                                                                                                                                                    | 1.123 | 7.37E-05 |          | 6.99E-06 | Fam52_f_m_aM       | 0/1;0/0;0/1         |
| chr1 | 27551044 | 27551044 | G | A | AHDC1    | exonic | nonsynonymous SNV | AHDC1:NM_001029882:exon6:c.C1072T:p.P358S                                                                                                                                                                                                                                                    | 1.371 | 0.0001   | 0.0002   | 7.68E-05 | Fam112_f_m_aM      | 0/1;0/0;0/1         |
| chr1 | 27551467 | 27551467 | C | T | AHDC1    | exonic | nonsynonymous SNV | AHDC1:NM_001029882:exon6:c.G649A:p.G217R<br>FAM76A:NM_001143915:exon6:c.T516G:p.D172E,FAM76A:NM_001143914:exon7:c.T669G:p.D223E,FAM76A:NM_001143913:exon8:c.T771G:p.D257E,FAM76A:NM_152660:exon8:c.T756G:p.D252E,FAM76A:NM_001143912:exon9:c.T858G:p.D286E                                   | 1.699 |          | 0.0002   | 2.09E-05 | Fam55_f_m_aM_aM_dM | 0/0;0/1;0/0;0/1;0/1 |
| chr1 | 27759546 | 27759546 | T | G | FAM76A   | exonic | nonsynonymous SNV | STX12:NM_177424:exon4:c.C289T:p.R97C                                                                                                                                                                                                                                                         | 1.656 |          |          | 6.99E-06 | Fam64_f_m_aM       | 0/0;0/1;0/1         |
| chr1 | 27801678 | 27801678 | C | T | STX12    | exonic | nonsynonymous SNV | THEMIS2:NM_001105556:exon4:c.C1652T:p.P551L,THEMIS2:NM_001286115:exon4:c.C1064T:p.P355L,THEMIS2:NM_001286113:exon5:c.C1265T:p.P422L                                                                                                                                                          | 1.172 |          | 1.42E-05 | 6.98E-06 | Fam55_f_m_aM_aM_dM | 0/0;0/1;0/0;0/1;0/1 |
| chr1 | 27882976 | 27882976 | C | T | THEMIS2  | exonic | nonsynonymous SNV | DNAJC8:NM_014280:exon6:c.C409G:p.R137G                                                                                                                                                                                                                                                       | 1.172 |          | 1.15E-05 |          | Fam52_f_m_aM       | 0/1;0/0;0/1         |
| chr1 | 28208404 | 28208404 | G | C | DNAJC8   | exonic | nonsynonymous SNV | SESN2:NM_031459:exon9:c.C1255T:p.R419W                                                                                                                                                                                                                                                       | 1.149 |          |          |          | Fam12_f_m_aM_uM_aM | 0/0;0/1;0/1;0/1;0/0 |
| chr1 | 28279140 | 28279140 | C | T | SESN2    | exonic | nonsynonymous SNV | GMEB1:NM_001319674:exon10:c.G1243A:p.A415T,GMEB1:NM_006582:exon10:c.G1273A:p.A425T,GMEB1:NM_024482:exon10:c.G1243A:p.A415T<br>PTRU:NM_001195001:exon16:c.C2548T:p.R850W,PTRU:NM_133177:exon16:c.C2548T:p.R850W,PTRU:NM_133178:exon16:c.C2548T:p.R850W,PTRU:NM_005704:exon17:c.C2578T:p.R860W | 1.348 | 7.34E-05 | 9.83E-05 | 3.49E-05 | Fam42_f_m_aM_uF    | 0/1;0/0;0/1;0/1     |
| chr1 | 28714324 | 28714324 | G | A | GMEB1    | exonic | nonsynonymous SNV | ADGRB2:NM_001294336:exon28:c.C4198T:p.R1400C,ADGRB2:NM_001294335:exon29:c.C4297T:p.R1433C,ADGRB2:NM_001364857:exon29:c.C4297T:p.R1433C                                                                                                                                                       | 1.121 |          | 2.23E-05 |          | Fam71_f_m_aF       | 0/1;0/0;0/1         |
| chr1 | 29303926 | 29303926 | C | T | PTPRU    | exonic | nonsynonymous SNV | ADGRB2:NM_001294336:exon12:c.G1883A:p.R628Q,ADGRB2:NM_001294335:exon12:c.G1883A:p.R628Q,ADGRB2:NM_001364857:exon12:c.G1883A:p.R628Q                                                                                                                                                          | 1.232 | 0.0003   | 0.0004   | 0.0002   | Fam86_f_m_aF       | 0/0;0/1;0/1         |
| chr1 | 31730883 | 31730883 | G | A | ADGRB2   | exonic | nonsynonymous SNV | ADGRB2:NM_001294336:exon9:c.G1490A:p.R497H,ADGRB2:NM_001294335:exon9:c.G1490A:p.R497H                                                                                                                                                                                                        | 1.69  | 0.0003   | 3.97E-05 | 4.19E-05 | Fam15_f_m_aM_aM    | 0/1;0/0;0/0;0/1     |
| chr1 | 31740453 | 31740453 | C | T | ADGRB2   | exonic | nonsynonymous SNV | KHDRBS1:NM_001271878:exon5:c.C911T:p.P304L,KHDRBS1:NM_006559:exon6:c.C1028T:p.P343L                                                                                                                                                                                                          | 1.108 | 0.0001   | 0.0001   | 4.88E-05 | Fam56_f_m_aF_aM    | 0/0;0/1;0/0;0/1     |
| chr1 | 31741895 | 31741895 | C | T | ADGRB2   | exonic | nonsynonymous SNV | TXLNA:NM_175852:exon3:c.A389G:p.N130S                                                                                                                                                                                                                                                        | 1.892 | 7.35E-05 | 4.49E-05 | 2.79E-05 | Fam45_f_m_aM_uF    | 0/1;0/0;0/1;0/1     |
| chr1 | 32037957 | 32037957 | C | T | KHDRBS1  | exonic | nonsynonymous SNV | HDAC1:NM_004964:exon12:c.A1331G:p.K444R                                                                                                                                                                                                                                                      | 2.11  |          |          |          | Fam51_f_m_aM_uF    | 0/0;0/1;0/1;0/1     |
| chr1 | 32181461 | 32181461 | A | G | TXLNA    | exonic | nonsynonymous SNV | ZBTB8A:NM_001040441:exon3:c.C161T:p.S54F,ZBTB8A:NM_001291496:exon3:c.C161T:p.S54F                                                                                                                                                                                                            | 1.077 | 0.0002   | 0.0005   | 0.0003   | Fam85_f_m_aM_aM    | 0/1;0/0;0/1;0/0     |
| chr1 | 32332201 | 32332201 | A | G | HDAC1    | exonic | nonsynonymous SNV | RBBP4:NM_001135255:exon4:c.A412G:p.I138V,RBBP4:NM_001135256:exon4:c.A310G:p.I104V,RBBP4:NM_005610:exon4:c.A415G:p.I139V                                                                                                                                                                      | 1.596 |          | 0.0003   | 6.98E-06 | Fam116_f_m_aM_aF   | 0/0;0/1;0/0;0/1     |
| chr1 | 32593092 | 32593092 | C | T | ZBTB8A   | exonic | nonsynonymous SNV | A3GALT2:NM_001080438:exon5:c.A761G:p.H254R                                                                                                                                                                                                                                                   | 1.219 |          |          |          | Fam14_f_m_aM_aM    | 0/0;0/1;0/0;0/1     |
| chr1 | 32668329 | 32668329 | A | G | RBBP4    | exonic | nonsynonymous SNV | PHC2:NM_004427:exon3:c.C160T:p.R54C,PHC2:NM_001330488:exon9:c.C1681T:p.R561C,PHC2:NM_198040:exon10:c.C1765T:p.R589C                                                                                                                                                                          | 1.33  |          | 6.17E-05 | 6.98E-06 | Fam16_f_m_aM_aM    | 0/1;0/0;0/1;0/0     |
| chr1 | 33307028 | 33307028 | T | C | A3GALT2  | exonic | nonsynonymous SNV | DLGAP3:NM_001080418:exon9:c.G2339A:p.R780H                                                                                                                                                                                                                                                   | 2.898 |          |          |          | Fam97_f_m_aM_aF    | 0/1;0/0;0/0;0/1     |
| chr1 | 33332398 | 33332398 | G | A | PHC2     | exonic | nonsynonymous SNV | DLGAP3:NM_001080418:exon9:c.G2269C:p.G757R                                                                                                                                                                                                                                                   | 1.346 |          | 3.28E-05 | 6.98E-06 | Fam85_f_m_aM_aM    | 0/1;0/0;0/1;0/0     |
| chr1 | 34868751 | 34868751 | C | T | DLGAP3   | exonic | nonsynonymous SNV | SFPQ:NM_005066:exon2:c.G846C:p.L282F                                                                                                                                                                                                                                                         | 1.748 |          | 3.49E-05 | 6.98E-06 | Fam105_f_m_aM      | 0/0;0/1;0/1         |
| chr1 | 34868821 | 34868821 | C | G | DLGAP3   | exonic | nonsynonymous SNV | NCDN:NM_001014841:exon4:c.G1246A:p.E416K,NCDN:NM_014284:exon4:c.G1297A:p.E433K,NCDN:NM_001014839:exon5:c.G1297A:p.E433K                                                                                                                                                                      | 1.716 | 0.0003   | 8.71E-05 | 3.49E-05 | Fam28_f_m_aF_uF    | 0/0;0/1;0/1;0/0     |
| chr1 | 35191512 | 35191512 | C | G | SFPQ     | exonic | nonsynonymous SNV | NCDN:NM_001014841:exon5:c.C1531T:p.L511F,NCDN:NM_014284:exon5:c.C1582T:p.L528F,NCDN:NM_001014839:exon6:c.C1582T:p.L528F                                                                                                                                                                      | 2.117 |          |          |          | Fam76_f_m_aM_uM    | 0/1;0/0;0/1;0/0     |
| chr1 | 35562545 | 35562545 | G | A | NCDN     | exonic | nonsynonymous SNV | CLSPN:NM_001190481:exon15:c.T2690G:p.L897X,CLSPN:NM_001330490:exon16:c.T2882G:p.L961X,CLSPN:NM_022111:exon16:c.T2882G:p.L961X                                                                                                                                                                | 1.108 |          | 1.12E-05 | 1.40E-05 | Fam51_f_m_aM_uF    | 0/1;0/0;0/1;0/1     |
| chr1 | 35563398 | 35563398 | C | T | NCDN     | exonic | nonsynonymous SNV | AGO4:NM_017629:exon5:c.G506A:p.R169H                                                                                                                                                                                                                                                         | 1.106 |          |          |          | Fam19_f_m_aM       | 0/0;0/1;0/1         |
| chr1 | 35745535 | 35745535 | A | C | CLSPN    | exonic | stopgain          | AGO4:NM_017629:exon15:c.T2126C:p.V709A                                                                                                                                                                                                                                                       | 0.511 |          |          |          | Fam57_f_m_aM_uF    | 0/0;0/1;0/1;0/1     |
| chr1 | 35825696 | 35825696 | G | A | AGO4     | exonic | nonsynonymous SNV | AGO3:NM_177422:exon8:c.G569A:p.R190Q,AGO3:NM_024852:exon10:c.G1271A:p.R424Q                                                                                                                                                                                                                  | 1.337 |          |          |          | Fam112_f_m_aM      | 0/0;0/1;0/1         |
| chr1 | 35841701 | 35841701 | T | C | AGO4     | exonic | nonsynonymous SNV | COL8A2:NM_001294347:exon4:c.T1472C:p.L491P,COL8A2:NM_005202:exon4:c.T1667C:p.L556P                                                                                                                                                                                                           | 2.04  |          |          |          | Fam89_f_m_aM       | 0/0;0/1;0/1         |
| chr1 | 36013751 | 36013751 | G | A | AGO3     | exonic | nonsynonymous SNV | CSF3R:NM_000760:exon10:c.G1243A:p.G415R,CSF3R:NM_156039:exon10:c.G1243A:p.G415R,CSF3R:NM_172313:exon10:c.G1243A:p.G415R                                                                                                                                                                      | 2.166 |          | 1.12E-05 | 6.98E-06 | Fam54_f_m_aM_uF    | 0/1;0/0;0/1;0/1     |
| chr1 | 36098014 | 36098014 | A | G | COL8A2   | exonic | nonsynonymous SNV | GRIK3:NM_000831:exon16:c.C2599T:p.R867C                                                                                                                                                                                                                                                      | 1.305 |          | 0.0001   | 7.68E-05 | Fam51_f_m_aM_uF    | 0/1;0/0;0/1;0/1     |
| chr1 | 36471475 | 36471475 | C | T | CSF3R    | exonic | nonsynonymous SNV | GRIK3:NM_000831:exon13:c.G1994A:p.R665H                                                                                                                                                                                                                                                      | 1.013 |          | 4.47E-05 | 1.40E-05 | Fam52_f_m_aM       | 0/0;0/1;0/1         |
| chr1 | 36802012 | 36802012 | G | A | GRIK3    | exonic | nonsynonymous SNV | GRIK3:NM_000831:exon10:c.G1372A:p.G458R                                                                                                                                                                                                                                                      | 1.772 |          | 0.0001   | 6.98E-06 | Fam26_f_m_aM_uM    | 0/0;0/1;0/1;0/1     |
| chr1 | 36817157 | 36817157 | C | T | GRIK3    | exonic | nonsynonymous SNV | MANEAL:NM_001031740:exon1:c.C465G:p.S155R,MANEAL:NM_00113482:exon1:c.C465G:p.S155R                                                                                                                                                                                                           | 1.86  |          | 7.45E-05 | 1.40E-05 | Fam24_f_m_aM_aM    | 0/1;0/0;0/1;0/0     |
| chr1 | 36841894 | 36841894 | C | T | GRIK3    | exonic | nonsynonymous SNV | C1orf122:NM_001142726:exon3:c.C83T:p.P28L,C1orf122:NM_198446:exon3:c.C272T:p.P91L                                                                                                                                                                                                            | 1.831 | 0.0006   | 3.27E-05 | 5.58E-05 | Fam119_f_m_aM_aM   | 0/0;0/1;0/0;0/1     |
| chr1 | 37794647 | 37794647 | C | G | MANEAL   | exonic | nonsynonymous SNV |                                                                                                                                                                                                                                                                                              | 2.4   |          |          |          | Fam26_f_m_aM_uM    | 0/1;0/0;0/1;0/0     |
| chr1 | 37809012 | 37809012 | C | T | C1orf122 | exonic | nonsynonymous SNV |                                                                                                                                                                                                                                                                                              | 2.054 |          | 1.14E-05 |          | Fam43_f_m_aM       | 0/0;0/1;0/1         |

|      |          |          |   |   |         |          |                     |                                                                                                                                                                                                                                                                                                                 |       |          |          |          |                        |                         |             |
|------|----------|----------|---|---|---------|----------|---------------------|-----------------------------------------------------------------------------------------------------------------------------------------------------------------------------------------------------------------------------------------------------------------------------------------------------------------|-------|----------|----------|----------|------------------------|-------------------------|-------------|
| chr1 | 39569632 | 39569632 | C | G | PABPC4  | exonic   | nonsynonymous SNV   | PABPC4:NM_001135653:exon5:c.G701C:p.G234A,PABPC4:NM_001135654:exon5:c.G701C:p.G234A,PABPC4:NM_003819:exon5:c.G701C:p.G234A                                                                                                                                                                                      | 1.569 | .        | .        | .        | .                      | Fam112_f_m_aM           | 0/1;0/0;0/1 |
| chr1 | 39661180 | 39661180 | C | T | NT5C1A  | exonic   | nonsynonymous SNV   | NT5C1A:NM_032526:exon5:c.G640A:p.A214T                                                                                                                                                                                                                                                                          | 1.17  | 0.0001   | 9.80E-05 | 2.79E-05 | Fam7_f_m_aM_aM_uM      | 0/1;0/0;0/0;0/1;0/1     |             |
| chr1 | 39848085 | 39848085 | C | T | TRIT1   | exonic   | nonsynonymous SNV   | TRIT1:NM_001312692:exon4:c.G470A:p.R157H,TRIT1:NM_001312691:exon6:c.G716A:p.R239H,TRIT1:NM_017646:exon6:c.G716A:p.R239H                                                                                                                                                                                         | 1.073 | 0.0003   | 6.17E-05 | 0.0001   | Fam113_f_m_aF_raM_uF   | 0/0;0/1;0/1;0/0;0/1     |             |
| chr1 | 40413039 | 40413039 | A | T | SMAP2   | exonic   | nonsynonymous SNV   | SMAP2:NM_001198978:exon5:c.A336T:p.K112N,SMAP2:NM_001198979:exon5:c.A411T:p.K137N,SMAP2:NM_001198980:exon5:c.A186T:p.K62N,SMAP2:NM_022733:exon5:c.A426T:p.K142N                                                                                                                                                 | 1.233 | .        | .        | 3.29E-05 | Fam85_f_m_aM_aM        | 0/0;0/1;0/1;0/1         |             |
| chr1 | 40416183 | 40416183 | G | A | SMAP2   | exonic   | nonsynonymous SNV   | SMAP2:NM_001198978:exon8:c.G599A:p.G200D,SMAP2:NM_001198979:exon8:c.G674A:p.G225D,SMAP2:NM_001198980:exon8:c.G449A:p.G150D,SMAP2:NM_022733:exon8:c.G689A:p.G230D                                                                                                                                                | 1.171 | .        | .        | .        | Fam55_f_m_aM_aM_dM     | 0/0;0/1;0/1;0/0;0/0     |             |
| chr1 | 41010238 | 41010238 | A | G | CTPS1   | exonic   | nonsynonymous SNV   | CTPS1:NM_001301237:exon14:c.A1301G:p.H434R,CTPS1:NM_001905:exon18:c.A1769G:p.H590R                                                                                                                                                                                                                              | 1.14  | 7.34E-05 | 6.57E-05 | 2.79E-05 | Fam77_f_m_aM_aF_uM_uFs | 0/1;0/0;0/0;0/1;0/0;0/0 |             |
| chr1 | 42928972 | 42928972 | G | A | SLC2A1  | exonic   | nonsynonymous SNV   | SLC2A1:NM_006516:exon8:c.C1034T:p.A345V                                                                                                                                                                                                                                                                         | 2.031 | .        | 0.0004   | 4.19E-05 | Fam121_f_m_aF_aM       | 0/1;0/0;0/1;0/0         |             |
| chr1 | 43307256 | 43307256 | G | C | TIE1    | exonic   | nonsynonymous SNV   | TIE1:NM_001253357:exon5:c.G620C:p.G207A,TIE1:NM_005424:exon5:c.G755C:p.G252A                                                                                                                                                                                                                                    | 1.119 | .        | 2.24E-05 | 1.40E-05 | Fam2_f_m_aF            | 0/0;0/1;0/1             |             |
| chr1 | 43313257 | 43313257 | G | C | TIE1    | exonic   | nonsynonymous SNV   | TIE1:NM_001253357:exon13:c.G1915C:p.A639P,TIE1:NM_005424:exon13:c.G2050C:p.A684P                                                                                                                                                                                                                                | 1.201 | .        | 5.59E-05 | 2.79E-05 | Fam88_f_m_aF           | 0/1;0/0;0/1             |             |
| chr1 | 43317663 | 43317663 | G | A | TIE1    | exonic   | nonsynonymous SNV   | TIE1:NM_001253357:exon16:c.G2585A:p.C862Y,TIE1:NM_005424:exon16:c.G2720A:p.C907Y                                                                                                                                                                                                                                | 1.387 | .        | 1.23E-05 | .        | Fam56_f_m_aF_aM        | 0/1;0/0;0/1;0/1         |             |
| chr1 | 43359267 | 43359267 | G | A | CDC20   | exonic   | nonsynonymous SNV   | CDC20:NM_001255:exon2:c.G52A:p.A18T                                                                                                                                                                                                                                                                             | 1.168 | .        | .        | .        | Fam36_f_m_aM_uM        | 0/0;0/1;0/1;0/0         |             |
| chr1 | 43435330 | 43435330 | G | A | SZT2    | splicing | .                   | .                                                                                                                                                                                                                                                                                                               | 0.582 | .        | .        | .        | Fam76_f_m_aM_uM        | 0/1;0/0;0/1;0/0         |             |
| chr1 | 43591218 | 43591218 | C | T | PTPRF   | exonic   | nonsynonymous SNV   | PTPRF:NM_001329139:exon9:c.C1196T:p.P399L,PTPRF:NM_001329140:exon9:c.C1196T:p.P399L,PTPRF:NM_002840:exon9:c.C1196T:p.P399L,PTPRF:NM_130440:exon9:c.C1196T:p.P399L,PTPRF:NM_001329137:exon11:c.C1214T:p.P405L,PTPRF:NM_001329138:exon12:c.C1226T:p.P409L                                                         | 1.038 | 0.0002   | 0.0003   | 0.0003   | Fam105_f_m_aM          | 0/0;0/1;0/1             |             |
| chr1 | 43981392 | 43981392 | G | A | B4GALT2 | exonic   | nonsynonymous SNV   | B4GALT2:NM_001005417:exon2:c.G232A:p.G78R,B4GALT2:NM_003780:exon2:c.G232A:p.G78R,B4GALT2:NM_030587:exon2:c.G319A:p.G107R                                                                                                                                                                                        | 1.066 | 0.0007   | 0.0007   | 0.0004   | Fam81_f_m_aM_uM        | 0/0;0/1;0/1;0/1         |             |
| chr1 | 44218615 | 44218615 | C | T | DMAP1   | exonic   | nonsynonymous SNV   | DMAP1:NM_019100:exon5:c.C580T:p.R194W,DMAP1:NM_001034023:exon6:c.C580T:p.R194W,DMAP1:NM_001034024:exon6:c.C580T:p.R194W                                                                                                                                                                                         | 1.361 | .        | 6.17E-05 | 2.09E-05 | Fam81_f_m_aM_uM        | 0/0;0/1;0/1;0/1         |             |
| chr1 | 44786159 | 44786159 | G | C | BEST4   | exonic   | nonsynonymous SNV   | BEST4:NM_153274:exon4:c.C551G:p.P184R                                                                                                                                                                                                                                                                           | 2.032 | .        | .        | .        | Fam60_f_m_aF           | 0/1;0/0;0/1             |             |
| chr1 | 44803014 | 44803014 | G | A | PLK3    | exonic   | nonsynonymous SNV   | PLK3:NM_004073:exon7:c.G809A:p.R270H                                                                                                                                                                                                                                                                            | 1.345 | .        | 0.0001   | 1.40E-05 | Fam74_f_m_aM_uM        | 0/0;0/1;0/1;0/1         |             |
| chr1 | 45005999 | 45005999 | G | C | HECTD3  | exonic   | nonsynonymous SNV   | HECTD3:NM_024602:exon14:c.C1843G:p.L615V                                                                                                                                                                                                                                                                        | 1.303 | .        | 1.12E-05 | .        | Fam97_f_m_aM_aF        | 0/1;0/0;0/1;0/0         |             |
| chr1 | 46023803 | 46023803 | C | T | MAST2   | exonic   | nonsynonymous SNV   | MAST2:NM_001319245:exon15:c.C1603T:p.R535W,MAST2:NM_001324321:exon15:c.C1411T:p.R381W,MAST2:NM_015112:exon15:c.C1603T:p.R535W,MAST2:NM_001324320:exon16:c.C1624T:p.R542W                                                                                                                                        | 2.121 | 0.0001   | 0.0002   | 6.99E-05 | Fam91_m_aM_dM_aM_dM    | 0/0;0/1;0/1;0/0;0/1     |             |
| chr1 | 46023899 | 46023899 | G | A | MAST2   | exonic   | nonsynonymous SNV   | MAST2:NM_001319245:exon15:c.G1699A:p.A567T,MAST2:NM_001324321:exon15:c.G1237A:p.A413T,MAST2:NM_015112:exon15:c.G1699A:p.A567T,MAST2:NM_001324320:exon16:c.G1720A:p.A574T                                                                                                                                        | 1.419 | .        | 1.12E-05 | .        | Fam91_m_aM_dM_aM_dM    | 0/0;0/1;0/1;0/0;0/1     |             |
| chr1 | 46035582 | 46035582 | C | - | MAST2   | exonic   | frameshift deletion | MAST2:NM_001319245:exon29:c.4910delC:p.T1639Pfs*14,MAST2:NM_001324321:exon29:c.4451delC:p.T1486Pfs*14,MAST2:NM_015112:exon29:c.4913delC:p.T1640Pfs*14,MAST2:NM_001324320:exon30:c.4934delC:p.T1647Pfs*14                                                                                                        | 0.576 | .        | 6.57E-05 | .        | Fam87_f_m_aM_uM        | 0/1;0/0;0/1;0/1         |             |
| chr1 | 46285824 | 46285824 | G | A | LRRC41  | exonic   | nonsynonymous SNV   | LRRC41:NM_006369:exon4:c.C1033T:p.P345S                                                                                                                                                                                                                                                                         | 1.393 | .        | 1.22E-05 | .        | Fam56_f_m_aF_aM        | 0/1;0/0;0/1;0/1         |             |
| chr1 | 47225690 | 47225690 | C | T | TAL1    | exonic   | nonsynonymous SNV   | TAL1:NM_001287347:exon3:c.G199A:p.G67R,TAL1:NM_001290403:exon3:c.G199A:p.G67R,TAL1:NM_001290405:exon3:c.G199A:p.G67R,TAL1:NM_001290404:exon4:c.G199A:p.G67R,TAL1:NM_003189:exon4:c.G199A:p.G67R                                                                                                                 | 1.863 | .        | .        | .        | Fam63_f_m_aF           | 0/1;0/0;0/1             |             |
| chr1 | 48759098 | 48759098 | A | G | BEND5   | exonic   | nonsynonymous SNV   | BEND5:NM_001349793:exon2:c.T40C:p.Y14H,BEND5:NM_001302082:exon3:c.T40C:p.Y14H,BEND5:NM_024603:exon3:c.T547C:p.Y183H,BEND5:NM_001349794:exon4:c.T40C:p.Y14H,BEND5:NM_001349795:exon5:c.T292C:p.Y98H                                                                                                              | 1.924 | .        | .        | .        | Fam7_f_m_aM_aM_uM      | 0/0;0/1;0/1;0/1;0/1     |             |
| chr1 | 50655447 | 50655447 | C | T | FAF1    | exonic   | nonsynonymous SNV   | FAF1:NM_007051:exon8:c.G739A:p.D247N                                                                                                                                                                                                                                                                            | 1.027 | .        | 6.54E-05 | 1.40E-05 | Fam29_f_m_aF_uM        | 0/1;0/0;0/1;0/0         |             |
| chr1 | 51269957 | 51269957 | A | G | RNF11   | exonic   | nonsynonymous SNV   | RNF11:NM_014372:exon2:c.A125G:p.E42G                                                                                                                                                                                                                                                                            | 1.231 | .        | .        | .        | Fam13_f_m_aM           | 0/1;0/0;0/1             |             |
| chr1 | 51288881 | 51288881 | T | C | TTC39A  | exonic   | nonsynonymous SNV   | TTC39A:NM_001297667:exon5:c.A299G:p.Q100R,TTC39A:NM_001297666:exon6:c.A500G:p.Q167R,TTC39A:NM_001080494:exon17:c.A1571G:p.Q524R,TTC39A:NM_001144832:exon17:c.A1580G:p.Q527R,TTC39A:NM_001297663:exon17:c.A1568G:p.Q523R,TTC39A:NM_001297664:exon17:c.A1487G:p.Q496R,TTC39A:NM_001297665:exon17:c.A1676G:p.Q559R | 1.046 | .        | .        | .        | Fam94_f_m_aM           | 0/1;0/0;0/1             |             |
| chr1 | 51834152 | 51834152 | A | C | NRDC    | exonic   | nonsynonymous SNV   | NRDC:NM_001101662:exon4:c.T731G:p.L244W,NRDC:NM_001242361:exon6:c.T539G:p.L180W,NRDC:NM_002525:exon6:c.T935G:p.L312W                                                                                                                                                                                            | 1.865 | 0.0002   | 0.0006   | 0.0003   | Fam28_f_m_aF_uF        | 0/0;0/1;0/1;0/1         |             |
| chr1 | 52033586 | 52033586 | C | T | KTI12   | exonic   | nonsynonymous SNV   | KTI12:NM_138417:exon1:c.G176A:p.R59H                                                                                                                                                                                                                                                                            | 1.692 | .        | .        | .        | Fam16_f_m_aM_aM        | 0/0;0/0;0/0;0/1         |             |

|      |           |           |      |   |            |        |                     |                                                                                                                                                                                                                                                                                                                                              |       |          |          |          |                        |                         |                     |
|------|-----------|-----------|------|---|------------|--------|---------------------|----------------------------------------------------------------------------------------------------------------------------------------------------------------------------------------------------------------------------------------------------------------------------------------------------------------------------------------------|-------|----------|----------|----------|------------------------|-------------------------|---------------------|
| chr1 | 52340227  | 52340227  | C    | G | ZFYVE9     | exonic | nonsynonymous SNV   | ZFYVE9:NM_007324:exon16:c.C3758G;p.T1253R,ZFYVE9:NM_004799:exon17:c.C3935G;p.T1312R                                                                                                                                                                                                                                                          | 1.765 |          | 1.12E-05 |          | Fam77_f_m_aM_aF_uM_uFs | 0/1;0/0;0/1;0/0;0/1;0/0 |                     |
| chr1 | 53080870  | 53080870  | T    | C | PODN       | exonic | nonsynonymous SNV   | PODN:NM_153703:exon9:c.T1799C;p.F600S,PODN:NM_001199081:exon10:c.T1742C;p.F581S,PODN:NM_001199080:exon11:c.T1742C;p.F581S                                                                                                                                                                                                                    | 1.499 | 7.35E-05 | 0.0002   | 9.77E-05 | Fam38_f_m_aM           | 0/1;0/0;0/1             |                     |
| chr1 | 53257382  | 53257383  | GG   | - | LRP8       | exonic | frameshift deletion | LRP8:NM_033300:exon13:c.1781_1782del;p.T5945fs*25,LRP8:NM_001018054:exon15:c.2291_2292del;p.T7645fs*25,LRP8:NM_004631:exon15:c.2291_2292del;p.T7645fs*25                                                                                                                                                                                     | 0.525 |          |          |          | Fam77_f_m_aM_aF_uM_uFs | 0/1;0/0;0/1;0/0;0/1;0/0 |                     |
| chr1 | 53271034  | 53271034  | C    | A | LRP8       | exonic | nonsynonymous SNV   | LRP8:NM_033300:exon6:c.G736T;p.A246S,LRP8:NM_017522:exon7:c.G859T;p.A287S,LRP8:NM_001018054:exon8:c.G1246T;p.A416S,LRP8:NM_004631:exon8:c.G1246T;p.A416S                                                                                                                                                                                     | 1.126 | 7.34E-05 | 0.0002   | 6.29E-05 | Fam84_f_m_aF           | 0/1;0/0;0/1             |                     |
| chr1 | 53327842  | 53327851  | AGCA | - | LRP8       | exonic | frameshift deletion | LRP8:NM_001018054:exon1:c.62_71del;p.L21Rfs*50,LRP8:NM_004631:exon1:c.62_71del;p.L21Rfs*50,LRP8:NM_017522:exon1:c.62_71del;p.L21Rfs*50,LRP8:NM_033300:exon1:c.62_71del;p.L21Rfs*50                                                                                                                                                           | 0.525 |          | 0.0003   | 0.0006   | 0.0002                 | Fam108_f_m_aM           | 0/0;0/1;0/1         |
| chr1 | 54782432  | 54782432  | C    | A | TTC22      | exonic | nonsynonymous SNV   | TTC22:NM_00114108:exon6:c.G1066T;p.G356C                                                                                                                                                                                                                                                                                                     | 1.019 |          | 0.0001   | 0.0001   | 0.0002                 | Fam108_f_m_aM           | 0/1;0/0;0/1         |
| chr1 | 54871547  | 54871547  | C    | T | DHCR24     | exonic | nonsynonymous SNV   | DHCR24:NM_014762:exon5:c.G679A;p.A227T                                                                                                                                                                                                                                                                                                       | 1.174 |          | 7.35E-05 | 0.0002   | 0.0001                 | Fam71_f_m_aF            | 0/1;0/0;0/1         |
| chr1 | 56537035  | 56537035  | T    | C | PLPP3      | exonic | nonsynonymous SNV   | PLPP3:NM_003713:exon2:c.A217G;p.I73V                                                                                                                                                                                                                                                                                                         | 1.154 |          |          |          |                        | Fam85_f_m_aM_aM         | 0/1;0/0;0/1;0/0     |
| chr1 | 56696021  | 56696021  | A    | T | PRKAA2     | exonic | nonsynonymous SNV   | PRKAA2:NM_006252:exon6:c.A650T;p.E217V                                                                                                                                                                                                                                                                                                       | 1.311 |          | 0.0003   | 0.0003   | 0.0001                 | Fam20_f_m_aM_uF         | 0/1;0/0;0/1;0/1     |
| chr1 | 61406578  | 61406578  | A    | C | NFIA       | exonic | nonsynonymous SNV   | NFIA:NM_001134673:exon9:c.A1271C;p.Q424P,NFIA:NM_001145511:exon9:c.A1247C;p.Q416P,NFIA:NM_005595:exon9:c.A1271C;p.Q424P,NFIA:NM_001145512:exon10:c.A1406;p.Q469P                                                                                                                                                                             | 2.114 |          |          |          | 0                      | Fam113_f_m_aF_raM_uF    | 0/0;0/0;0/0;0/1;0/0 |
| chr1 | 63415884  | 63415884  | C    | T | ALG6       | exonic | nonsynonymous SNV   | ALG6:NM_013339:exon11:c.C914T;p.T305M                                                                                                                                                                                                                                                                                                        | 1.006 | 7.36E-05 | 6.58E-05 | 1.40E-05 | Fam57_f_m_aM_uF        | 0/1;0/0;0/1;0/0         |                     |
| chr1 | 64845593  | 64845593  | T    | G | JAK1       | exonic | nonsynonymous SNV   | JAK1:NM_001321852:exon15:c.A2035C;p.M679L,JAK1:NM_001321856:exon15:c.A2035C;p.M679L,JAK1:NM_001321857:exon15:c.A2032C;p.M678L,JAK1:NM_002227:exon15:c.A2035C;p.M679L,JAK1:NM_001320923:exon16:c.A2035C;p.M679L,JAK1:NM_001321854:exon16:c.A2035C;p.M679L,JAK1:NM_001321855:exon16:c.A2035C;p.M679L,JAK1:NM_001321853:exon17:c.A2035C;p.M679L | 1.364 |          |          | 5.61E-05 | 1.40E-05               | Fam117_f_m_aM_aF        | 0/0;0/1;0/0;0/1     |
| chr1 | 65190745  | 65190745  | A    | T | AK4        | exonic | nonsynonymous SNV   | AK4:NM_001330616:exon2:c.A25T;p.S9C,AK4:NM_013410:exon2:c.A181T;p.S61C,AK4:NM_001005353:exon3:c.A181T;p.S61C,AK4:NM_203464:exon3:c.A181T;p.S61C                                                                                                                                                                                              | 1.251 | 7.35E-05 | 3.35E-05 | 6.98E-06 | Fam42_f_m_aM_uF        | 0/0;0/1;0/1;0/0         |                     |
| chr1 | 70354051  | 70354051  | C    | T | ANKRD13C   | exonic | nonsynonymous SNV   | ANKRD13C:NM_030816:exon1:c.G358A;p.V120I                                                                                                                                                                                                                                                                                                     | 1.141 |          | 0.0009   | 0.0006   | 0.0002                 | Fam46_f_m_aM_uM         | 0/1;0/0;0/1;0/0     |
| chr1 | 75791527  | 75791527  | G    | A | RABGGTB    | exonic | nonsynonymous SNV   | RABGGTB:NM_004582:exon6:c.G535A;p.G179S                                                                                                                                                                                                                                                                                                      | 1.84  |          |          | 3.28E-05 | 1.40E-05               | Fam50_f_m_aF            | 0/0;0/1;0/1         |
| chr1 | 77063063  | 77063063  | C    | T | ST6GALNAC5 | exonic | nonsynonymous SNV   | ST6GALNAC5:NM_030965:exon5:c.C868T;p.R290C                                                                                                                                                                                                                                                                                                   | 1.286 |          | 0.0001   | 6.17E-05 | 6.99E-05               | Fam34_f_m_aM_uF         | 0/0;0/1;0/1;0/0     |
| chr1 | 83890439  | 83890439  | G    | A | TTL7       | exonic | nonsynonymous SNV   | TTL7:NM_001350215:exon18:c.C2170T;p.R724C,TTL7:NM_024686:exon19:c.C2251T;p.R751C,TTL7:NM_001350214:exon20:c.C2251T;p.R751C                                                                                                                                                                                                                   | 1.603 |          | 0.0006   | 0.0002   | 0.0001                 | Fam10_f_m_aM_uF         | 0/1;0/0;0/1;0/0     |
| chr1 | 83917606  | 83917606  | T    | C | TTL7       | exonic | nonsynonymous SNV   | TTL7:NM_001350215:exon13:c.A1504G;p.K502E,TTL7:NM_024686:exon14:c.A1585G;p.K529E,TTL7:NM_001350214:exon15:c.A1585G;p.K529E                                                                                                                                                                                                                   | 1.448 |          |          |          |                        | Fam38_f_m_aM            | 0/0;0/1;0/1         |
| chr1 | 85582508  | 85582508  | T    | C | CCN1       | exonic | nonsynonymous SNV   | CCN1:NM_001554:exon4:c.T727C;p.C243R                                                                                                                                                                                                                                                                                                         | 1.324 |          |          | 1.12E-05 |                        | Fam56_f_m_aF_aM         | 0/1;0/0;0/1;0/1     |
| chr1 | 87332097  | 87332097  | G    | A | LMO4       | exonic | nonsynonymous SNV   | LMO4:NM_001369491:exon2:c.G82A;p.G28S,LMO4:NM_006769:exon2:c.G82A;p.G28S                                                                                                                                                                                                                                                                     | 2.181 |          |          | 1.13E-05 |                        | Fam24_f_m_aM_aM         | 0/0;0/1;0/1;0/0     |
| chr1 | 89712973  | 89712973  | A    | G | LRR8C      | exonic | nonsynonymous SNV   | LRR8C:NM_032270:exon3:c.A403G;p.T135A                                                                                                                                                                                                                                                                                                        | 1.349 |          |          |          |                        | Fam47_f_m_aM            | 0/0;0/1;0/1         |
| chr1 | 92841780  | 92841780  | A    | G | RPL5       | exonic | nonsynonymous SNV   | RPL5:NM_000969:exon8:c.A809G;p.K270R                                                                                                                                                                                                                                                                                                         | 1.142 |          |          | 1.13E-05 | 6.98E-06               | Fam60_f_m_aF            | 0/1;0/0;0/1         |
| chr1 | 93533006  | 93533006  | C    | A | FNBP1L     | exonic | nonsynonymous SNV   | FNBP1L:NM_001024948:exon8:c.C724A;p.P242T,FNBP1L:NM_001164473:exon8:c.C724A;p.P242T,FNBP1L:NM_017737:exon8:c.C724A;p.P242T                                                                                                                                                                                                                   | 1.226 |          |          |          |                        | Fam10_f_m_aM_uF         | 0/0;0/1;0/1;0/0     |
| chr1 | 94897830  | 94897830  | T    | C | CNN3       | exonic | nonsynonymous SNV   | CNN3:NM_001286055:exon6:c.A764G;p.Q255R,CNN3:NM_001839:exon7:c.A902G;p.Q301R                                                                                                                                                                                                                                                                 | 1.376 |          |          |          |                        | Fam9_f_m_aM_dM_uF       | 0/1;0/0;0/1;0/0;0/1 |
| chr1 | 98953177  | 98953177  | T    | C | PLPPR5     | exonic | nonsynonymous SNV   | PLPPR5:NM_001010861:exon3:c.A514G;p.S172G,PLPPR5:NM_001037317:exon3:c.A514G;p.S172G                                                                                                                                                                                                                                                          | 1.914 |          |          |          | 6.98E-06               | Fam97_f_m_aM_aF         | 0/0;0/1;0/1;0/1     |
| chr1 | 99306498  | 99306498  | A    | G | PLPPR4     | exonic | nonsynonymous SNV   | PLPPR4:NM_001166252:exon6:c.A1606G;p.K536E,PLPPR4:NM_014839:exon7:c.A1780G;p.K594E                                                                                                                                                                                                                                                           | 1.055 |          |          |          |                        | Fam2_f_m_aF             | 0/1;0/0;0/1         |
| chr1 | 100068083 | 100068083 | C    | T | MFS14A     | exonic | nonsynonymous SNV   | MFS14A:NM_033055:exon6:c.C593T;p.A198V                                                                                                                                                                                                                                                                                                       | 1.998 |          |          |          |                        | Fam6_f_m_aM             | 0/0;0/1;0/1         |
| chr1 | 101239135 | 101239135 | G    | A | S1PR1      | exonic | nonsynonymous SNV   | S1PR1:NM_001320730:exon2:c.G151A;p.V51M,S1PR1:NM_001400:exon2:c.G151A;p.V51M                                                                                                                                                                                                                                                                 | 1.067 | 7.34E-05 | 5.58E-05 | 1.40E-05 | Fam26_f_m_aM_uM        | 0/1;0/0;0/1;0/1         |                     |
| chr1 | 102962199 | 102962199 | C    | A | COL11A1    | exonic | stopgain            | COL11A1:NM_008630:exon38:c.G2743T;p.E915X,COL11A1:NM_001190709:exon39:c.G2974T;p.E992X,COL11A1:NM_001854:exon40:c.G3091T;p.E1031X,COL11A1:NM_080629:exon40:c.G3127T;p.E1043X                                                                                                                                                                 | 0.344 |          |          |          |                        | Fam14_f_m_aM_aM         | 0/0;0/1;0/1;0/0     |
| chr1 | 109074996 | 109074996 | A    | G | TAF13      | exonic | nonsynonymous SNV   | TAF13:NM_005645:exon2:c.T97C;p.S33P                                                                                                                                                                                                                                                                                                          | 1.262 |          |          | 4.67E-05 |                        | Fam82_f_m_aM_uF         | 0/0;0/1;0/1;0/1     |
| chr1 | 109107982 | 109107982 | C    | T | C1orf194   | exonic | nonsynonymous SNV   | C1orf194:NM_001122961:exon2:c.G101A;p.R34Q,C1orf194:NM_001245025:exon2:c.G137A;p.R46Q,C1orf194:NM_001366200:exon2:c.G131A;p.R44Q                                                                                                                                                                                                             | 1.355 |          | 0.0003   | 0.0002   | 0.0001                 | Fam121_f_m_aF_aM        | 0/0;0/1;0/1;0/1     |
| chr1 | 109251694 | 109251694 | C    | T | CELSR2     | exonic | nonsynonymous SNV   | CELSR2:NM_001408:exon1:c.C1615T;p.R539C                                                                                                                                                                                                                                                                                                      | 1.393 |          | 0.0004   | 0.0007   | 0.0004                 | Fam4_f_m_aM             | 0/1;0/0;0/1         |
| chr1 | 109262350 | 109262350 | G    | A | CELSR2     | exonic | nonsynonymous SNV   | CELSR2:NM_001408:exon6:c.G4450A;p.V1484M                                                                                                                                                                                                                                                                                                     | 1.168 |          |          | 0.0001   | 2.79E-05               | Fam49_f_m_aM            | 0/0;0/1;0/1         |
| chr1 | 109269434 | 109269434 | C    | T | CELSR2     | exonic | nonsynonymous SNV   | CELSR2:NM_001408:exon21:c.C6823T;p.R2275C                                                                                                                                                                                                                                                                                                    | 1.388 |          |          | 6.18E-05 |                        | Fam67_f_m_aM_uF         | 0/0;0/1;0/1;0/1     |
| chr1 | 109603362 | 109603362 | G    | A | GNAT2      | exonic | nonsynonymous SNV   | GNAT2:NM_005272:exon8:c.C1057T;p.L353F                                                                                                                                                                                                                                                                                                       | 1.104 |          | 0.0001   | 0.0001   | 8.37E-05               | Fam82_f_m_aM_uF         | 0/1;0/0;0/1;0/0     |

|      |           |           |   |   |           |        |                     |                                                                                                                                                                                                                                                                                                                           |       |       |          |          |          |                     |                     |             |
|------|-----------|-----------|---|---|-----------|--------|---------------------|---------------------------------------------------------------------------------------------------------------------------------------------------------------------------------------------------------------------------------------------------------------------------------------------------------------------------|-------|-------|----------|----------|----------|---------------------|---------------------|-------------|
| chr1 | 109668462 | 109668462 | A | T | GSTM2     | exonic | nonsynonymous SNV   | GSTM2:NM_000848:exon2:c.A74T;p.D25V,GSTM2:NM_01142368:exon2:c.A74T;p.D25V                                                                                                                                                                                                                                                 | 1.277 | .     | .        | .        | .        | .                   | Fam75_f_m_aM        | 0/0;0/1;0/1 |
| chr1 | 110053882 | 110053882 | G | C | STRIP1    | exonic | nonsynonymous SNV   | STRIP1:NM_001270768:exon21:c.G2199C;p.K733N,STRIP1:NM_033088:exon21:c.G2484C;p.K828N                                                                                                                                                                                                                                      | 1.237 | .     | 0.0002   | 0.0001   | 8.37E-05 | Fam26_f_m_aM_uM     | 0/1;0/0;0/1;0/0     |             |
| chr1 | 110223282 | 110223282 | G | A | KCNC4     | exonic | nonsynonymous SNV   | KCNC4:NM_001039574:exon2:c.G997A;p.G333S,KCNC4:NM_004978:exon2:c.G997A;p.G333S                                                                                                                                                                                                                                            | 1.535 | .     | 0.0006   | 0.0007   | 0.0004   | Fam28_f_m_aF_uF     | 0/0;0/1;0/1;0/1     |             |
| chr1 | 111695356 | 111695356 | C | T | RAP1A     | exonic | stopgain            | RAP1A:NM_001291896:exon3:c.C73T;p.Q25X,RAP1A:NM_001370216:exon3:c.C73T;p.Q25X,RAP1A:NM_001370217:exon3:c.C73T;p.Q25X,RAP1A:NM_002884:exon3:c.C73T;p.Q25X,RAP1A:NM_001010935:exon4:c.C73T;p.Q25X                                                                                                                           | 0.433 | .     | .        | .        | .        | Fam69_f_m_aM        | 0/0;0/0;0/1         |             |
| chr1 | 112715181 | 112715181 | C | T | PPM1J     | exonic | nonsynonymous SNV   | PPM1J:NM_005167:exon1:c.G121A;p.E41K                                                                                                                                                                                                                                                                                      | 1.343 | .     | .        | .        | .        | Fam10_f_m_aM_uF     | 0/0;0/1;0/1;0/0     |             |
| chr1 | 114510883 | 114510883 | C | A | TRIM33    | exonic | nonsynonymous SNV   | TRIM33:NM_015906:exon1:c.G194T;p.G65V,TRIM33:NM_033020:exon1:c.G194T;p.G65V                                                                                                                                                                                                                                               | 1.498 | .     | .        | .        | .        | Fam79_f_m_aM_uM     | 0/0;0/1;0/1;0/0     |             |
| chr1 | 114726316 | 114726316 | C | T | CSDE1     | exonic | nonsynonymous SNV   | CSDE1:NM_001242893:exon12:c.G1442A;p.R481H,CSDE1:NM_001242892:exon13:c.G1535A;p.R512H,CSDE1:NM_001242892:exon13:c.G1535A;p.R512H,CSDE1:NM_001242892:exon13:c.G1535A;p.R512H,CSDE1:NM_001007553:exon14:c.G1535A;p.R512H,CSDE1:NM_001130523:exon14:c.G1580A;p.R527H,CSDE1:NM_001242891:exon15:c.G1673A;p.R558H              | 1.169 | .     | .        | 7.46E-05 | 2.79E-05 | Fam53_f_m_aM        | 0/1;0/0;0/1         |             |
| chr1 | 116388729 | 116388729 | G | A | ATP1A1    | exonic | nonsynonymous SNV   | ATP1A1:NM_000701:exon6:c.G593A;p.R198Q,ATP1A1:NM_001160233:exon6:c.G593A;p.R198Q,ATP1A1:NM_001160234:exon6:c.G500A;p.R167Q                                                                                                                                                                                                | 1.665 | .     | .        | .        | .        | Fam78_f_m_aF_uM     | 0/0;0/1;0/1;0/1     |             |
| chr1 | 116577455 | 116577455 | G | A | IGSF3     | exonic | nonsynonymous SNV   | IGSF3:NM_001007237:exon11:c.C3442T;p.R1148C,IGSF3:NM_001542:exon12:c.C3502T;p.R1168C                                                                                                                                                                                                                                      | 1.765 | .     | .        | 0.0003   | 2.09E-05 | Fam56_f_m_aF_aM     | 0/0;0/1;0/0;0/1     |             |
| chr1 | 116585047 | 116585047 | G | A | IGSF3     | exonic | nonsynonymous SNV   | IGSF3:NM_001007237:exon9:c.C2446T;p.R816C,IGSF3:NM_001542:exon10:c.C2506T;p.R836C                                                                                                                                                                                                                                         | 1.663 | .     | .        | 1.48E-05 | .        | Fam19_f_m_aM        | 0/0;0/1;0/1         |             |
| chr1 | 116941990 | 116941990 | G | T | PTGFRN    | exonic | nonsynonymous SNV   | PTGFRN:NM_020440:exon2:c.G325T;p.V109F                                                                                                                                                                                                                                                                                    | 1.382 | .     | .        | 2.23E-05 | .        | Fam57_f_m_aM_uF     | 0/0;0/1;0/1;0/1     |             |
| chr1 | 116984868 | 116984868 | G | G | PTGFRN    | exonic | nonsynonymous SNV   | PTGFRN:NM_020440:exon8:c.C2356G;p.Q786E                                                                                                                                                                                                                                                                                   | 1.033 | .     | 0.0002   | 0.0004   | 4.89E-05 | Fam118_f_m_aM_aF_uM | 0/1;0/0;0/1;0/1;0/1 |             |
| chr1 | 116984980 | 116984980 | T | C | PTGFRN    | exonic | nonsynonymous SNV   | PTGFRN:NM_020440:exon8:c.T2468C;p.M823T                                                                                                                                                                                                                                                                                   | 1.36  | .     | .        | .        | .        | Fam20_f_m_aM_uM     | 0/0;0/1;0/1;0/1     |             |
| chr1 | 117112400 | 117112400 | A | G | TRIM45    | exonic | nonsynonymous SNV   | TRIM45:NM_001145635:exon6:c.T1594C;p.W532R,TRIM45:NM_025188:exon6:c.T1648C;p.W550R                                                                                                                                                                                                                                        | 1.165 | .     | 7.34E-05 | 3.35E-05 | 1.40E-05 | Fam85_f_m_aM_aM     | 0/1;0/0;0/1;0/1     |             |
| chr1 | 119623897 | 119623897 | A | G | ZNF697    | exonic | nonsynonymous SNV   | ZNF697:NM_001080470:exon3:c.T446C;p.L149P                                                                                                                                                                                                                                                                                 | 1.97  | .     | .        | .        | .        | Fam118_f_m_aM_aF_uM | 0/1;0/0;0/1;0/1;0/1 |             |
| chr1 | 149887357 | 149887357 | G | C | HIST2H2AC | exonic | nonsynonymous SNV   | HIST2H2AC:NM_003517:exon1:c.G383C;p.S128T                                                                                                                                                                                                                                                                                 | 1.126 | .     | .        | 3.38E-05 | 3.49E-05 | Fam42_f_m_aM_uF     | 0/0;0/1;0/1;0/1     |             |
| chr1 | 149943871 | 149943871 | C | - | OTUD7B    | exonic | frameshift deletion | OTUD7B:NM_020205:exon12:c.2518delG;p.V840Cfs*10                                                                                                                                                                                                                                                                           | 0.526 | .     | .        | .        | .        | Fam100_f_m_aF       | 0/1;0/0;0/1         |             |
| chr1 | 150338280 | 150338280 | G | A | PRPF3     | exonic | nonsynonymous SNV   | PRPF3:NM_004698:exon8:c.G1156A;p.E386K,PRPF3:NM_01350529:exon9:c.G751A;p.E251K                                                                                                                                                                                                                                            | 1.225 | .     | .        | .        | .        | Fam22_f_m_aF_aF_uF  | 0/0;0/1;0/1;0/1;0/1 |             |
| chr1 | 150471742 | 150471742 | A | T | RPRD2     | exonic | stopgain            | RPRD2:NM_001297673:exon10:c.A2716T;p.K906X                                                                                                                                                                                                                                                                                | 0.376 | 0.712 | .        | .        | .        | Fam95_f_m_aM_aM_uF  | 0/0;0/1;0/1;0/1;0/0 |             |
| chr1 | 150487499 | 150487499 | G | C | TARS2     | exonic | nonsynonymous SNV   | TARS2:NM_001271895:exon1:c.G49C;p.A17P,TARS2:NM_01271896:exon1:c.G49C;p.A17P,TARS2:NM_025150:exon1:c.G49C;p.A17P                                                                                                                                                                                                          | 1.063 | .     | .        | .        | .        | Fam116_f_m_aM_aF    | 0/1;0/0;0/1;0/0     |             |
| chr1 | 150648506 | 150648506 | G | A | GOLPH3L   | exonic | nonsynonymous SNV   | GOLPH3L:NM_018178:exon5:c.C673T;p.L225F                                                                                                                                                                                                                                                                                   | 1.038 | .     | .        | .        | 6.98E-06 | Fam7_f_m_aM_aM_uM   | 0/0;0/1;0/1;0/1;0/0 |             |
| chr1 | 150834584 | 150834584 | T | C | ARNT      | exonic | nonsynonymous SNV   | ARNT:NM_001197325:exon7:c.A712G;p.M238V,ARNT:NM_0178427:exon7:c.A712G;p.M238V,ARNT:NM_001286036:exon8:c.A757G;p.M253V,ARNT:NM_001350225:exon8:c.A754G;p.M252V,ARNT:NM_001350226:exon8:c.A757G;p.M251V,ARNT:NM_001668:exon8:c.A757G;p.M253V,ARNT:NM_001286035:exon9:c.A730G;p.M244V,ARNT:NM_00135024:exon9:c.A730G;p.M244V | 1.195 | .     | .        | .        | .        | Fam30_f_m_aM_uM     | 0/1;0/0;0/1;0/0     |             |
| chr1 | 151047905 | 151047905 | G | A | C1orf56   | exonic | nonsynonymous SNV   | C1orf56:NM_017860:exon1:c.G58A;p.A20T                                                                                                                                                                                                                                                                                     | 1.504 | .     | .        | .        | .        | Fam43_f_m_aM        | 0/0;0/1;0/1         |             |
| chr1 | 151048062 | 151048062 | C | G | C1orf56   | exonic | nonsynonymous SNV   | C1orf56:NM_017860:exon1:c.C215G;p.A72G                                                                                                                                                                                                                                                                                    | 1.487 | .     | .        | 2.27E-05 | .        | Fam2_f_m_aF         | 0/1;0/0;0/1         |             |
| chr1 | 151137041 | 151137041 | G | A | SEMA6C    | exonic | nonsynonymous SNV   | SEMA6C:NM_001178062:exon10:c.C670T;p.R224C,SEMA6C:NM_001178061:exon11:c.C790T;p.R264C,SEMA6C:NM_030913:exon11:c.C790T;p.R264C                                                                                                                                                                                             | 1.323 | .     | 0.001    | 0.0007   | 0.0004   | Fam72_f_m_aF_uF     | 0/0;0/1;0/1;0/0     |             |
| chr1 | 151158920 | 151158920 | C | T | TNFAIP8L2 | exonic | nonsynonymous SNV   | TNFAIP8L2:NM_024575:exon2:c.C223T;p.R75C                                                                                                                                                                                                                                                                                  | 1.064 | .     | .        | 3.36E-05 | 2.09E-05 | Fam2_f_m_aF         | 0/0;0/1;0/1         |             |
| chr1 | 151158968 | 151158968 | C | T | TNFAIP8L2 | exonic | nonsynonymous SNV   | TNFAIP8L2:NM_024575:exon2:c.C271T;p.R91C                                                                                                                                                                                                                                                                                  | 1.071 | .     | 7.34E-05 | 3.27E-05 | 1.40E-05 | Fam92_f_m_aM_raM    | 0/0;0/1;0/1;0/0     |             |
| chr1 | 151224262 | 151224262 | A | G | PIP5K1A   | exonic | nonsynonymous SNV   | PIP5K1A:NM_001135636:exon2:c.A103G;p.R35G,PIP5K1A:NM_001135637:exon2:c.A100G;p.R34G,PIP5K1A:NM_001135638:exon2:c.A103G;p.R35G,PIP5K1A:NM_001330689:exon2:c.A103G;p.R35G,PIP5K1A:NM_003557:exon2:c.A100G;p.R34G                                                                                                            | 1.191 | .     | .        | .        | .        | Fam28_f_m_aF_uF     | 0/1;0/0;0/1;0/0     |             |
| chr1 | 151232657 | 151232657 | A | G | PIP5K1A   | exonic | nonsynonymous SNV   | PIP5K1A:NM_001135636:exon6:c.A557G;p.H186R,PIP5K1A:NM_001135637:exon6:c.A554G;p.H185R,PIP5K1A:NM_01330689:exon6:c.A557G;p.H186R,PIP5K1A:NM_003557:exon6:c.A554G;p.H185R,PIP5K1A:NM_001135638:exon7:c.A593G;p.H198R                                                                                                        | 1.738 | .     | .        | .        | .        | Fam94_f_m_aM        | 0/1;0/0;0/1         |             |
| chr1 | 151662236 | 151662236 | T | A | SNX27     | exonic | nonsynonymous SNV   | SNX27:NM_001330723:exon5:c.T872A;p.V291D,SNX27:NM_030918:exon5:c.T872A;p.V291D                                                                                                                                                                                                                                            | 1.944 | .     | .        | 3.36E-05 | .        | Fam67_f_m_aM_uF     | 0/1;0/0;0/1;0/0     |             |
| chr1 | 153686655 | 153686655 | G | A | NPR1      | exonic | nonsynonymous SNV   | NPR1:NM_000906:exon11:c.G1768A;p.V590M                                                                                                                                                                                                                                                                                    | 1.725 | .     | 0.0003   | 0.0005   | 0.0004   | Fam24_f_m_aM_aM     | 0/0;0/1;0/0;0/1     |             |
| chr1 | 153688089 | 153688089 | C | A | NPR1      | exonic | nonsynonymous SNV   | NPR1:NM_000906:exon15:c.C2285A;p.P762H                                                                                                                                                                                                                                                                                    | 1.615 | .     | .        | .        | .        | Fam59_f_m_aF_uM     | 0/1;0/0;0/1;0/0     |             |
| chr1 | 153747025 | 153747025 | A | G | INTS3     | exonic | nonsynonymous SNV   | INTS3:NM_023015:exon4:c.A387G;p.I129M,INTS3:NM_001324475:exon5:c.A387G;p.I129M                                                                                                                                                                                                                                            | 1.283 | .     | .        | 0.0002   | .        | Fam54_f_m_aM_uF     | 0/1;0/0;0/1;0/1     |             |
| chr1 | 153770242 | 153770242 | C | A | INTS3     | exonic | nonsynonymous SNV   | INTS3:NM_023015:exon24:c.C2434A;p.Q812K,INTS3:NM_01324475:exon25:c.C2434A;p.Q812K                                                                                                                                                                                                                                         | 2.452 | .     | .        | .        | .        | Fam7_f_m_aM_aM_uM   | 0/0;0/1;0/0;0/1;0/1 |             |
| chr1 | 153773233 | 153773233 | G | A | INTS3     | exonic | nonsynonymous SNV   | INTS3:NM_023015:exon30:c.G3092A;p.R1031Q,INTS3:NM_001324475:exon31:c.G3092A;p.R1031Q                                                                                                                                                                                                                                      | 2.305 | .     | .        | 7.46E-05 | .        | Fam99_f_m_aM_aM     | 0/1;0/0;0/0;0/1     |             |

|      |           |           |   |   |          |        |                   |                                                                                                                                                                                                                                                                                                                                                                                                                                |       |          |          |          |                        |                         |
|------|-----------|-----------|---|---|----------|--------|-------------------|--------------------------------------------------------------------------------------------------------------------------------------------------------------------------------------------------------------------------------------------------------------------------------------------------------------------------------------------------------------------------------------------------------------------------------|-------|----------|----------|----------|------------------------|-------------------------|
| chr1 | 154212459 | 154212459 | C | T | C1orf43  | exonic | nonsynonymous SNV | C1orf43:NM_138740:exon3:c.G350A:p.G117E,C1orf43:NM_001297717:exon4:c.G452A:p.G151E,C1orf43:NM_001297720:exon4:c.G452A:p.G151E,C1orf43:NM_001297721:exon4:c.G404A:p.G135E,C1orf43:NM_015449:exon4:c.G404A:p.G135E,C1orf43:NM_001098616:exon5:c.G506A:p.G169E,C1orf43:NM_001297718:exon5:c.G401A:p.G134E,C1orf43:NM_001297723:exon5:c.G506A:p.G169E                                                                              | 1.233 | 7.34E-05 | 2.23E-05 | 1.40E-05 | Fam86_f_m_aF           | 0/0;0/1;0/1             |
| chr1 | 154584918 | 154584918 | C | T | ADAR     | exonic | nonsynonymous SNV | ADAR:NM_001025107:exon15:c.G2684A:p.R895H,ADAR:NM_001111:exon15:c.G3569A:p.R1190H,ADAR:NM_001193495:exon15:c.G2684A:p.R895H,ADAR:NM_001365045:exon15:c.G3596A:p.R1199H,ADAR:NM_001365048:exon15:c.G2684A:p.R895H,ADAR:NM_015840:exon15:c.G3491A:p.R1164H,ADAR:NM_015841:exon15:c.G3434A:p.R1145H,ADAR:NM_001365046:exon16:c.G2684A:p.R895H,ADAR:NM_001365047:exon16:c.G2684A:p.R895H,ADAR:NM_001365049:exon16:c.G2606A:p.R869H | 1.148 |          |          |          | Fam89_f_m_aM           | 0/0;0/1;0/1             |
| chr1 | 154708235 | 154708235 | T | C | KCNN3    | exonic | nonsynonymous SNV | KCNN3:NM_001365838:exon8:c.A998G:p.N333S,KCNN3:NM_002249:exon8:c.A1937G:p.N646S,KCNN3:NM_170782:exon8:c.A1022G:p.N341S,KCNN3:NM_001204087:exon9:c.A1982G:p.N661S,KCNN3:NM_001365837:exon9:c.A1043G:p.N348S                                                                                                                                                                                                                     | 1.757 | 0.0003   | 7.45E-05 | 2.09E-05 | Fam117_f_m_aM_aF       | 0/1;0/0;0/1;0/1         |
| chr1 | 154869490 | 154869490 | T | C | KCNN3    | exonic | nonsynonymous SNV | KCNN3:NM_001204087:exon1:c.A475G:p.S159G,KCNN3:NM_002249:exon1:c.A475G:p.S159G                                                                                                                                                                                                                                                                                                                                                 | 1.801 |          |          |          | Fam118_f_m_aM_aF_uM    | 0/0;0/1;0/1;0/1;0/0     |
| chr1 | 155178125 | 155178125 | C | T | TRIM46   | exonic | nonsynonymous SNV | TRIM46:NM_001282378:exon5:c.C655T:p.R219C,TRIM46:NM_001256599:exon6:c.C964T:p.R322C,TRIM46:NM_001256601:exon6:c.C994T:p.R332C,TRIM46:NM_001282379:exon6:c.C1033T:p.R345C,TRIM46:NM_025058:exon6:c.C1033T:p.R345C                                                                                                                                                                                                               | 1.26  |          | 8.98E-05 | 4.89E-05 | Fam77_f_m_aM_aF_uM_uFs | 0/0;0/1;0/1;0/0;0/0;0/1 |
| chr1 | 155197062 | 155197062 | C | T | THBS3    | exonic | nonsynonymous SNV | THBS3:NM_001252608:exon19:c.G2291A:p.R764Q,THBS3:NM_001252607:exon20:c.G2624A:p.R875Q,THBS3:NM_007112:exon21:c.G2651A:p.R884Q                                                                                                                                                                                                                                                                                                  | 1.23  |          | 6.71E-05 | 1.40E-05 | Fam7_f_m_aM_aM_uM      | 0/0;0/1;0/1;0/0;0/0     |
| chr1 | 155250347 | 155250347 | G | A | FAM189B  | exonic | nonsynonymous SNV | FAM189B:NM_198264:exon6:c.C1151T:p.P384L,FAM189B:NM_001267608:exon8:c.C1385T:p.P462L,FAM189B:NM_006589:exon9:c.C1439T:p.P480L                                                                                                                                                                                                                                                                                                  | 1.568 | 0.0003   | 4.41E-05 | 6.98E-06 | Fam87_f_m_aM_uM        | 0/0;0/1;0/1;0/0         |
| chr1 | 155269499 | 155269499 | G | A | CLK2     | exonic | nonsynonymous SNV | CLK2:NM_001294338:exon3:c.C388T:p.R130C,CLK2:NM_01363704:exon3:c.C385T:p.R129C,CLK2:NM_003993:exon3:c.C388T:p.R130C                                                                                                                                                                                                                                                                                                            | 1.229 |          | 0.0004   | 1.40E-05 | Fam6_f_m_aM            | 0/0;0/1;0/1             |
| chr1 | 155269501 | 155269501 | C | T | CLK2     | exonic | nonsynonymous SNV | CLK2:NM_001294338:exon3:c.G386A:p.S129N,CLK2:NM_01363704:exon3:c.G383A:p.S128N,CLK2:NM_003993:exon3:c.G386A:p.S129N                                                                                                                                                                                                                                                                                                            | 1.153 |          |          |          | Fam11_f_m_aM_uM        | 0/0;0/1;0/1;0/1         |
| chr1 | 155349338 | 155349338 | G | A | ASH1L    | exonic | nonsynonymous SNV | ASH1L:NM_001366177:exon19:c.C7558T:p.R2520W,ASH1L:NM_018489:exon19:c.C7543T:p.R2515W                                                                                                                                                                                                                                                                                                                                           | 1.833 |          | 0.0001   |          | Fam108_f_m_aM          | 0/0;0/1;0/1             |
| chr1 | 155775119 | 155775119 | G | T | GON4L    | exonic | nonsynonymous SNV | GON4L:NM_001282856:exon17:c.C2233A:p.P745T,GON4L:NM_001282858:exon17:c.C2233A:p.P745T,GON4L:NM_001282860:exon17:c.C2233A:p.P745T,GON4L:NM_001282861:exon17:c.C2233A:p.P745T,GON4L:NM_032292:exon17:c.C2233A:p.P745T                                                                                                                                                                                                            | 1.826 | 0.0004   | 0.001    | 0.0003   | Fam56_f_m_aF_aM        | 0/1;0/0;0/1;0/0         |
| chr1 | 155904373 | 155904373 | G | A | RIT1     | exonic | nonsynonymous SNV | RIT1:NM_001256820:exon4:c.C259T:p.R87C,RIT1:NM_001256821:exon5:c.C418T:p.R140C,RIT1:NM_006912:exon5:c.C367T:p.R123C                                                                                                                                                                                                                                                                                                            | 1.062 |          |          | 2.09E-05 | Fam72_f_m_aF_uF        | 0/0;0/1;0/1;0/0         |
| chr1 | 155925668 | 155925668 | C | G | KHDC4    | exonic | nonsynonymous SNV | KHDC4:NM_014949:exon7:c.G857C:p.G286A                                                                                                                                                                                                                                                                                                                                                                                          | 1.166 |          |          |          | Fam63_f_m_aF           | 0/1;0/0;0/1             |
| chr1 | 155963003 | 155963003 | C | T | ARHGEF2  | exonic | nonsynonymous SNV | ARHGEF2:NM_001162383:exon8:c.G905A:p.R302H,ARHGEF2:NM_001162384:exon8:c.G902A:p.R301H,ARHGEF2:NM_001350110:exon8:c.G824A:p.R275H,ARHGEF2:NM_001350111:exon8:c.G824A:p.R275H,ARHGEF2:NM_001350112:exon8:c.G851A:p.R284H,ARHGEF2:NM_004723:exon8:c.G821A:p.R274H                                                                                                                                                                 | 1.572 |          | 0.0001   | 2.79E-05 | Fam43_f_m_aM           | 0/0;0/1;0/1             |
| chr1 | 156011873 | 156011873 | A | T | SSR2     | exonic | nonsynonymous SNV | SSR2:NM_003145:exon5:c.T378A:p.S126R                                                                                                                                                                                                                                                                                                                                                                                           | 1.401 |          | 1.12E-05 |          | Fam61_f_m_aM           | 0/0;0/1;0/1             |
| chr1 | 156114949 | 156114949 | C | T | LMNA     | exonic | nonsynonymous SNV | LMNA:NM_001282626:exon1:c.C31T:p.R11C,LMNA:NM_005572:exon1:c.C31T:p.R11C,LMNA:NM_170707:exon1:c.C31T:p.R11C,LMNA:NM_170708:exon1:c.C31T:p.R11C,LMNA:NM_001282625:exon4:c.C31T:p.R11C                                                                                                                                                                                                                                           | 1.988 | 0.0003   |          |          | Fam33_f_m_aM_uM        | 0/0;0/1;0/1;0/0         |
| chr1 | 156253492 | 156253492 | C | T | SMG5     | exonic | nonsynonymous SNV | SMG5:NM_001323614:exon16:c.G2300A:p.R767H,SMG5:NM_001323615:exon16:c.G2321A:p.R774H,SMG5:NM_015327:exon17:c.G2459A:p.R820H,SMG5:NM_001323616:exon18:c.G2261A:p.R754H,SMG5:NM_001323617:exon18:c.G2261A:p.R754H                                                                                                                                                                                                                 | 1.091 |          | 0.0001   |          | Fam1_f_m_aM            | 0/1;0/0;0/1             |
| chr1 | 156624051 | 156624051 | C | G | HAPLN2   | exonic | nonsynonymous SNV | HAPLN2:NM_021817:exon4:c.C330G:p.D110E                                                                                                                                                                                                                                                                                                                                                                                         | 1.81  |          | 9.38E-05 | 6.98E-06 | Fam26_f_m_aM_uM        | 0/1;0/0;0/1;0/0         |
| chr1 | 156624106 | 156624106 | G | A | HAPLN2   | exonic | nonsynonymous SNV | HAPLN2:NM_021817:exon4:c.G385A:p.E129K                                                                                                                                                                                                                                                                                                                                                                                         | 1.848 |          |          |          | Fam95_f_m_aM_aM_uF     | 0/1;0/0;0/1;0/1;0/0     |
| chr1 | 156646888 | 156646888 | A | G | BCAN     | exonic | nonsynonymous SNV | BCAN:NM_021948:exon3:c.A179G:p.H60R,BCAN:NM_198427:exon3:c.A179G:p.H60R                                                                                                                                                                                                                                                                                                                                                        | 1.398 | 7.37E-05 |          | 1.40E-05 | Fam54_f_m_aM_uF        | 0/0;0/1;0/1;0/1         |
| chr1 | 156646899 | 156646899 | C | T | BCAN     | exonic | nonsynonymous SNV | BCAN:NM_021948:exon3:c.C190T:p.P64S,BCAN:NM_198427:exon3:c.C190T:p.P64S                                                                                                                                                                                                                                                                                                                                                        | 1.665 |          |          |          | Fam48_f_m_aM_uM        | 0/1;0/0;0/1;0/0         |
| chr1 | 156676960 | 156676960 | C | G | NES      | exonic | nonsynonymous SNV | NES:NM_006617:exon1:c.G305C:p.R102P                                                                                                                                                                                                                                                                                                                                                                                            | 2.447 |          |          |          | Fam78_f_m_aF_uM        | 0/1;0/0;0/1;0/1         |
| chr1 | 156955732 | 156955732 | A | G | ARHGEF11 | exonic | nonsynonymous SNV | ARHGEF11:NM_014784:exon19:c.T1619C:p.I540T,ARHGEF11:NM_198236:exon20:c.T1739C:p.I580T                                                                                                                                                                                                                                                                                                                                          | 1.323 |          |          | 6.98E-06 | Fam114_f_m_aM          | 0/0;0/1;0/1             |
| chr1 | 157099189 | 157099189 | C | T | ETV3L    | exonic | nonsynonymous SNV | ETV3L:NM_001004341:exon2:c.G248A:p.R83K                                                                                                                                                                                                                                                                                                                                                                                        | 2.022 |          | 3.36E-05 |          | Fam98_f_m_aM           | 0/1;0/0;0/1             |
| chr1 | 157099211 | 157099211 | C | A | ETV3L    | exonic | nonsynonymous SNV | ETV3L:NM_001004341:exon2:c.G226T:p.V76L                                                                                                                                                                                                                                                                                                                                                                                        | 1.837 |          |          |          | Fam73_f_m_aF_dM        | 0/0;0/1;0/1;0/0         |
| chr1 | 157125614 | 157125614 | C | T | ETV3     | exonic | nonsynonymous SNV | ETV3:NM_001145312:exon5:c.G766A:p.G256R                                                                                                                                                                                                                                                                                                                                                                                        | 2.039 |          | 0.0005   | 0.0001   | Fam121_f_m_aF_aM       | 0/1;0/0;0/1;0/1         |

|      |           |           |   |   |         |          |                   |                                                                                                                                                                                                                                                                                                                                                                                                                                                                              |       |          |          |                 |                     |                     |
|------|-----------|-----------|---|---|---------|----------|-------------------|------------------------------------------------------------------------------------------------------------------------------------------------------------------------------------------------------------------------------------------------------------------------------------------------------------------------------------------------------------------------------------------------------------------------------------------------------------------------------|-------|----------|----------|-----------------|---------------------|---------------------|
| chr1 | 158076124 | 158076124 | C | T | KIRREL1 | exonic   | nonsynonymous SNV | KIRREL1:NM_018240:exon2:c.C64T;p.R22C                                                                                                                                                                                                                                                                                                                                                                                                                                        | 1.838 | 0.0002   | 2.79E-05 | Fam57_f_m_aM_uF | 0/0;0/1;0/1;0/0     |                     |
| chr1 | 158093381 | 158093381 | C | T | KIRREL1 | exonic   | nonsynonymous SNV | KIRREL1:NM_001286349:exon10:c.C1214T;p.A405V,KIRREL1:NM_018240:exon12:c.C1514T;p.A505V                                                                                                                                                                                                                                                                                                                                                                                       | 1.075 | 0.0001   | 0.0003   | 6.98E-05        | Fam40_f_m_aM_aM     | 0/1;0/0;0/0;0/1     |
| chr1 | 158681526 | 158681526 | C | A | SPTA1   | splicing | .                 | .                                                                                                                                                                                                                                                                                                                                                                                                                                                                            | 0.592 | .        | .        | Fam38_f_m_aM    | 0/1;0/0;0/1         |                     |
| chr1 | 159199867 | 159199867 | C | T | CADM3   | exonic   | nonsynonymous SNV | CADM3:NM_001127173:exon8:c.C1069T;p.R357W,CADM3:NM_001346510:exon8:c.C931T;p.R311W,CADM3:NM_021189:exon9:c.C1171T;p.R391W                                                                                                                                                                                                                                                                                                                                                    | 1.281 | .        | 2.24E-05 | 1.40E-05        | Fam16_f_m_aM_aM     | 0/0;0/1;0/1;0/0     |
| chr1 | 160240062 | 160240062 | G | A | DCAF8   | exonic   | nonsynonymous SNV | DCAF8:NM_015726:exon4:c.C358T;p.R120C                                                                                                                                                                                                                                                                                                                                                                                                                                        | 1.166 | .        | 0.0001   | 6.98E-05        | Fam121_f_m_aF_aM    | 0/1;0/0;0/1;0/1     |
| chr1 | 160296140 | 160296140 | G | C | COPA    | exonic   | nonsynonymous SNV | COPA:NM_001098398:exon22:c.C2300G;p.A767G,COPA:NM_004371:exon22:c.C2273G;p.A758G                                                                                                                                                                                                                                                                                                                                                                                             | 1.363 | .        | .        | 6.98E-06        | Fam66_f_m_aM        | 0/1;0/0;0/1         |
| chr1 | 160297429 | 160297429 | C | A | COPA    | exonic   | nonsynonymous SNV | COPA:NM_001098398:exon21:c.G2204T;p.R735I,COPA:NM_004371:exon21:c.G2177T;p.R726I                                                                                                                                                                                                                                                                                                                                                                                             | 1.012 | .        | .        | .               | Fam30_f_m_aM_uM     | 0/1;0/0;0/1;0/0     |
| chr1 | 160419212 | 160419212 | C | T | VANGL2  | exonic   | nonsynonymous SNV | VANGL2:NM_020335:exon4:c.C403T;p.R135W                                                                                                                                                                                                                                                                                                                                                                                                                                       | 1.426 | .        | 0.0002   | 4.89E-05        | Fam14_f_m_aM_aM     | 0/1;0/0;0/1;0/1     |
| chr1 | 160421109 | 160421109 | G | A | VANGL2  | exonic   | nonsynonymous SNV | VANGL2:NM_020335:exon6:c.G995A;p.R332Q                                                                                                                                                                                                                                                                                                                                                                                                                                       | 1.417 | .        | .        | 0.0001          | Fam62_f_m_aM_aM     | 0/0;0/1;0/1;0/1     |
| chr1 | 161168559 | 161168559 | G | C | PPOX    | exonic   | nonsynonymous SNV | PPOX:NM_001350128:exon5:c.G500C;p.G167A,PPOX:NM_001350131:exon5:c.G113C;p.G38A,PPOX:NM_001365400:exon5:c.G191C;p.G64A,PPOX:NM_001365401:exon5:c.G113C;p.G38A,PPOX:NM_000309:exon6:c.G599C;p.G200A,PPOX:NM_001122764:exon6:c.G599C;p.G200A,PPOX:NM_001350129:exon6:c.G191C;p.G64A,PPOX:NM_001350130:exon6:c.G113C;p.G38A,PPOX:NM_001365398:exon6:c.G599C;p.G200A,PPOX:NM_001365399:exon6:c.G599C;p.G200A                                                                      | 1.363 | .        | .        | .               | Fam5_f_m_aM         | 0/0;0/1;0/1         |
| chr1 | 161306450 | 161306450 | C | G | MPZ     | exonic   | nonsynonymous SNV | MPZ:NM_000530:exon4:c.G463C;p.G155R                                                                                                                                                                                                                                                                                                                                                                                                                                          | 1.645 | .        | .        | .               | Fam83_f_m_aF        | 0/1;0/0;0/1         |
| chr1 | 161365011 | 161365011 | G | A | CFAP126 | exonic   | nonsynonymous SNV | CFAP126:NM_001013625:exon5:c.C488T;p.P163L                                                                                                                                                                                                                                                                                                                                                                                                                                   | 1.505 | .        | .        | .               | Fam36_f_m_aM_uM     | 0/1;0/0;0/1;0/0     |
| chr1 | 162287428 | 162287428 | A | G | NOS1AP  | exonic   | nonsynonymous SNV | NOS1AP:NM_001164757:exon3:c.A262G;p.K88E,NOS1AP:NM_014697:exon3:c.A262G;p.K88E,DDR2:NM_001354982:exon17:c.A2392G;p.I798V,DDR2:NM_001354983:exon17:c.A2392G;p.I798V,DDR2:NM_006182:exon17:c.A2392G;p.I798V,DDR2:NM_001014796:exon18:c.A2392G;p.I798V                                                                                                                                                                                                                          | 2.782 | .        | .        | .               | Fam19_f_m_aM        | 0/0;0/1;0/1         |
| chr1 | 162778688 | 162778688 | A | G | DDR2    | exonic   | nonsynonymous SNV | DDR2:NM_001354982:exon17:c.A2392G;p.I798V,DDR2:NM_001354983:exon17:c.A2392G;p.I798V,DDR2:NM_006182:exon17:c.A2392G;p.I798V,DDR2:NM_001014796:exon18:c.A2392G;p.I798V                                                                                                                                                                                                                                                                                                         | 1.188 | .        | .        | .               | Fam65_f_m_aM_uF_dF  | 0/0;0/1;0/1;0/0;0/1 |
| chr1 | 163343845 | 163343845 | C | G | NUF2    | exonic   | nonsynonymous SNV | NUF2:NM_031423:exon10:c.C782G;p.T261R,NUF2:NM_145697:exon10:c.C782G;p.T261R                                                                                                                                                                                                                                                                                                                                                                                                  | 1.192 | .        | .        | .               | Fam44_f_m_aM_uF     | 0/0;0/1;0/1;0/0     |
| chr1 | 163347863 | 163347863 | A | G | NUF2    | exonic   | nonsynonymous SNV | NUF2:NM_031423:exon12:c.A1049G;p.E350G,NUF2:NM_145697:exon12:c.A1049G;p.E350G                                                                                                                                                                                                                                                                                                                                                                                                | 1.062 | .        | .        | .               | Fam13_f_m_aM        | 0/1;0/0;0/1         |
| chr1 | 166849066 | 166849066 | G | C | POGK    | exonic   | nonsynonymous SNV | POGK:NM_001314014:exon3:c.G133C;p.E45Q,POGK:NM_017542:exon5:c.G487C;p.E163Q                                                                                                                                                                                                                                                                                                                                                                                                  | 1.947 | .        | 1.12E-05 | .               | Fam119_f_m_aM_aM    | 0/1;0/0;0/1;0/0     |
| chr1 | 166849985 | 166849985 | T | C | POGK    | exonic   | nonsynonymous SNV | POGK:NM_001314014:exon3:c.T1052C;p.I351T,POGK:NM_017542:exon5:c.T1406C;p.I469T                                                                                                                                                                                                                                                                                                                                                                                               | 2.164 | .        | .        | .               | Fam33_f_m_aM_uM     | 0/1;0/0;0/1;0/1     |
| chr1 | 167415585 | 167415585 | C | A | POU2F1  | exonic   | nonsynonymous SNV | POU2F1:NM_001198786:exon15:c.C1887A;p.N629K,POU2F1:NM_001198783:exon16:c.C2043A;p.N681K,POU2F1:NM_002697:exon16:c.C2076A;p.N692K,POU2F1:NM_001365849:exon17:c.C2001A;p.N667K,POU2F1:NM_001365848:exon18:c.C2001A;p.N667K                                                                                                                                                                                                                                                     | 1.208 | .        | .        | .               | Fam61_f_m_aM        | 0/1;0/0;0/1         |
| chr1 | 168096613 | 168096613 | G | A | GPR161  | exonic   | nonsynonymous SNV | GPR161:NM_001267613:exon2:c.C760T;p.R254C,GPR161:NM_001267614:exon2:c.C652T;p.R218C,GPR161:NM_001349635:exon2:c.C598T;p.R200C,GPR161:NM_001267611:exon3:c.C1045T;p.R349C,GPR161:NM_001267612:exon3:c.C598T;p.R200C,GPR161:NM_001349633:exon3:c.C994T;p.R332C,GPR161:NM_001267609:exon4:c.C1054T;p.R352C,GPR161:NM_001267610:exon4:c.C994T;p.R332C,GPR161:NM_001349632:exon5:c.C994T;p.R332C,GPR161:NM_001349634:exon5:c.C994T;p.R332C,GPR161:NM_153832:exon5:c.C994T;p.R332C | 1.1   | .        | 6.55E-05 | .               | Fam96_f_m_aM_uF     | 0/1;0/0;0/1;0/1     |
| chr1 | 168096853 | 168096853 | T | A | GPR161  | exonic   | nonsynonymous SNV | GPR161:NM_001267613:exon2:c.A520T;p.R174W,GPR161:NM_001267614:exon2:c.A412T;p.R138W,GPR161:NM_001349635:exon2:c.A358T;p.R120W,GPR161:NM_001267611:exon3:c.A805T;p.R269W,GPR161:NM_001267612:exon3:c.A358T;p.R120W,GPR161:NM_001349633:exon3:c.A754T;p.R252W,GPR161:NM_001267609:exon4:c.A814T;p.R272W,GPR161:NM_001267610:exon4:c.A754T;p.R252W,GPR161:NM_001349632:exon5:c.A754T;p.R252W,GPR161:NM_001349634:exon5:c.A754T;p.R252W,GPR161:NM_153832:exon5:c.A754T;p.R252W   | 1.073 | .        | 1.12E-05 | 6.98E-06        | Fam91_m_aM_dM_aM_dM | 0/1;0/1;0/1;0/1;0/1 |
| chr1 | 168096969 | 168096969 | C | T | GPR161  | exonic   | nonsynonymous SNV | GPR161:NM_001267613:exon2:c.G404A;p.R135H,GPR161:NM_001267614:exon2:c.G296A;p.R99H,GPR161:NM_001349635:exon2:c.G242A;p.R81H,GPR161:NM_001267611:exon3:c.G689A;p.R230H,GPR161:NM_001267612:exon3:c.G242A;p.R81H,GPR161:NM_001349633:exon3:c.G638A;p.R213H,GPR161:NM_001267609:exon4:c.G698A;p.R233H,GPR161:NM_001267610:exon4:c.G638A;p.R213H,GPR161:NM_001349632:exon5:c.G638A;p.R213H,GPR161:NM_001349634:exon5:c.G638A;p.R213H,GPR161:NM_153832:exon5:c.G638A;p.R213H      | 1.158 | .        | 6.54E-05 | 2.09E-05        | Fam51_f_m_aM_uF     | 0/1;0/0;0/1;0/1     |
| chr1 | 168231591 | 168231591 | C | G | SFT2D2  | exonic   | nonsynonymous SNV | SFT2D2:NM_199344:exon2:c.C141G;p.C47W                                                                                                                                                                                                                                                                                                                                                                                                                                        | 1.046 | 7.35E-05 | 1.12E-05 | 6.98E-06        | Fam17_f_m_aM_uM     | 0/1;0/0;0/1;0/0     |
| chr1 | 169111490 | 169111490 | C | T | ATP1B1  | exonic   | nonsynonymous SNV | ATP1B1:NM_001677:exon2:c.C218T;p.A73V                                                                                                                                                                                                                                                                                                                                                                                                                                        | 1.397 | .        | .        | 2.79E-05        | Fam119_f_m_aM_aM    | 0/1;0/0;0/1;0/0     |
| chr1 | 173481390 | 173481390 | G | A | PRDX6   | exonic   | nonsynonymous SNV | PRDX6:NM_004905:exon2:c.G160A;p.A54T                                                                                                                                                                                                                                                                                                                                                                                                                                         | 1.302 | .        | .        | .               | Fam91_m_aM_dM_aM_dM | 0/0;0/1;0/1;0/0;0/1 |



|      |           |           |   |   |          |          |                   |                                                                                                                                                                                                                                                                                                                                                                               |       |          |          |          |                     |                     |
|------|-----------|-----------|---|---|----------|----------|-------------------|-------------------------------------------------------------------------------------------------------------------------------------------------------------------------------------------------------------------------------------------------------------------------------------------------------------------------------------------------------------------------------|-------|----------|----------|----------|---------------------|---------------------|
| chr1 | 173836959 | 173836959 | T | A | DARS2    | exonic   | nonsynonymous SNV | DARS2:NM_001365212:exon8:c.T683A:p.V228E,DARS2:NM_001365213:exon8:c.T683A:p.V228E,DARS2:NM_018122:exon8:c.T683A:p.V228E                                                                                                                                                                                                                                                       | 1.124 | .        | .        | .        | Fam117_f_m_aM_aF    | 0/0/0/1/0/1/0/0     |
| chr1 | 173836959 | 173836959 | T | A | DARS2    | exonic   | nonsynonymous SNV | DARS2:NM_001365212:exon8:c.T683A:p.V228E,DARS2:NM_001365213:exon8:c.T683A:p.V228E,DARS2:NM_018122:exon8:c.T683A:p.V228E                                                                                                                                                                                                                                                       | 1.124 | .        | .        | .        | Fam39_f_m_aM        | 0/1/0/0/0/1         |
| chr1 | 173914726 | 173914726 | G | A | SERPINC1 | exonic   | nonsynonymous SNV | SERPINC1:NM_000488:exon2:c.C235T:p.R79C,SERPINC1:NM_001365052:exon3:c.C91T:p.R31C                                                                                                                                                                                                                                                                                             | 1.331 | .        | 0.0004   | 4.88E-05 | Fam4_f_m_aM         | 0/1/0/0/0/1         |
| chr1 | 174219296 | 174219296 | G | A | RABGAP1L | splicing | .                 | .                                                                                                                                                                                                                                                                                                                                                                             | 0.586 | .        | 9.37E-05 | 3.50E-05 | Fam14_f_m_aM_aM     | 0/1/0/0/0/1/0/1     |
| chr1 | 178457852 | 178457852 | C | T | RASAL2   | exonic   | stopgain          | RASAL2:NM_004841:exon12:c.C2137T:p.Q713X,RASAL2:NM_170692:exon14:c.C2560T:p.Q854X                                                                                                                                                                                                                                                                                             | 0.552 | .        | .        | .        | Fam19_f_m_aM        | 0/0/0/0/0/1         |
| chr1 | 180825282 | 180825282 | T | C | XPR1     | exonic   | nonsynonymous SNV | XPR1:NM_001135669:exon9:c.T1072C:p.F358L,XPR1:NM_001328662:exon9:c.T1072C:p.F358L,XPR1:NM_004736:exon9:c.T1072C:p.F358L                                                                                                                                                                                                                                                       | 1.133 | .        | 0.0002   | 6.28E-05 | Fam44_f_m_aM_uF     | 0/0/0/1/0/1/0/0     |
| chr1 | 182858557 | 182858557 | C | T | DHX9     | exonic   | nonsynonymous SNV | DHX9:NM_001357:exon9:c.C817T:p.P273S                                                                                                                                                                                                                                                                                                                                          | 1.965 | .        | .        | .        | Fam23_f_m_aM_dF_uFs | 0/1/0/0/0/1/0/1/0/0 |
| chr1 | 183560120 | 183560120 | C | T | NCF2     | exonic   | nonsynonymous SNV | NCF2:NM_001190789:exon12:c.G1201A:p.D401N,NCF2:NM_001190794:exon13:c.G1309A:p.D437N,NCF2:NM_000433:exon14:c.G1444A:p.D482N,NCF2:NM_001127651:exon15:c.G1444A:p.D482N                                                                                                                                                                                                          | 1.028 | .        | 1.12E-05 | .        | Fam92_f_m_aM_raM    | 0/0/0/0/0/0/0/1     |
| chr1 | 183590226 | 183590226 | G | A | NCF2     | exonic   | nonsynonymous SNV | NCF2:NM_000433:exon1:c.C104T:p.P35L,NCF2:NM_001190789:exon1:c.C104T:p.P35L,NCF2:NM_001190794:exon1:c.C104T:p.P35L,NCF2:NM_001127651:exon2:c.C104T:p.P35L                                                                                                                                                                                                                      | 1.051 | .        | .        | .        | Fam43_f_m_aM        | 0/0/0/1/0/1         |
| chr1 | 183916655 | 183916655 | G | A | RGL1     | exonic   | nonsynonymous SNV | RGL1:NM_001297672:exon15:c.G1871A:p.R624H,RGL1:NM_001297670:exon16:c.G1952A:p.R651H,RGL1:NM_001297671:exon16:c.G1958A:p.R653H,RGL1:NM_001297669:exon17:c.G1952A:p.R651H,RGL1:NM_015149:exon17:c.G2063A:p.R688H                                                                                                                                                                | 1.116 | .        | 7.46E-05 | 6.99E-06 | Fam24_f_m_aM_aM     | 0/1/0/0/0/1/0/0     |
| chr1 | 185300308 | 185300308 | G | C | IVNS1ABP | exonic   | nonsynonymous SNV | IVNS1ABP:NM_006469:exon12:c.C1278G:p.H426Q                                                                                                                                                                                                                                                                                                                                    | 1.385 | 0.0003   | 0.0004   | 0.0001   | Fam25_f_m_aM        | 0/0/0/1/0/1         |
| chr1 | 190226207 | 190226207 | C | T | BRINP3   | exonic   | stopgain          | BRINP3:NM_001317188:exon5:c.G530A:p.W177X,BRINP3:NM_199051:exon6:c.G836A:p.W279X                                                                                                                                                                                                                                                                                              | 0.364 | .        | .        | .        | Fam108_f_m_aM       | 0/0/0/1/0/1         |
| chr1 | 200407539 | 200407539 | A | G | ZNF281   | exonic   | nonsynonymous SNV | ZNF281:NM_001281293:exon2:c.T2167C:p.S723P,ZNF281:NM_012482:exon2:c.T2167C:p.S723P,ZNF281:NM_001281294:exon3:c.T2059C:p.S687P                                                                                                                                                                                                                                                 | 1.616 | .        | .        | .        | Fam85_f_m_aM_aM     | 0/0/0/1/0/1/0/1     |
| chr1 | 200739961 | 200739961 | G | A | CAMSAP2  | exonic   | nonsynonymous SNV | CAMSAP2:NM_001297707:exon1:c.G134A:p.G45E,CAMSAP2:NM_203459:exon1:c.G134A:p.G45E                                                                                                                                                                                                                                                                                              | 1.132 | .        | 2.23E-05 | .        | Fam47_f_m_aM        | 0/1/0/0/0/1         |
| chr1 | 200832336 | 200832336 | T | C | CAMSAP2  | exonic   | nonsynonymous SNV | CAMSAP2:NM_001297708:exon5:c.T782C:p.L261S,CAMSAP2:NM_203459:exon5:c.T782C:p.L261S,CAMSAP2:NM_001297707:exon6:c.T815C:p.L272S                                                                                                                                                                                                                                                 | 1.128 | 0.0004   | 0.0002   | 0.0002   | Fam62_f_m_aM_aM     | 0/0/0/1/0/1/0/1     |
| chr1 | 200979556 | 200979556 | G | A | KIF21B   | exonic   | nonsynonymous SNV | KIF21B:NM_001252103:exon29:c.C4100T:p.A1367V,KIF21B:NM_017596:exon29:c.C4100T:p.A1367V,KIF21B:NM_001252100:exon30:c.C4139T:p.A1380V,KIF21B:NM_001252102:exon30:c.C4139T:p.A1380V                                                                                                                                                                                              | 1.41  | .        | .        | 1.40E-05 | Fam34_f_m_aM_uF     | 0/1/0/0/0/1/0/0     |
| chr1 | 201135809 | 201135809 | G | A | TMEM9    | exonic   | nonsynonymous SNV | TMEM9:NM_001288565:exon5:c.C406T:p.R136C,TMEM9:NM_001288564:exon6:c.C406T:p.R136C,TMEM9:NM_001288566:exon6:c.C406T:p.R136C,TMEM9:NM_001288567:exon6:c.C406T:p.R136C,TMEM9:NM_001288568:exon6:c.C406T:p.R136C,TMEM9:NM_001288569:exon6:c.C406T:p.R136C,TMEM9:NM_001288570:exon6:c.C415T:p.R139C,TMEM9:NM_001288571:exon6:c.C481T:p.R161C,TMEM9:NM_016456:exon6:c.C406T:p.R136C | 1.293 | 7.35E-05 | 7.08E-05 | 1.40E-05 | Fam11_f_m_aM_uM     | 0/0/0/1/0/1/0/1     |
| chr1 | 201359245 | 201359245 | G | A | TNNT2    | exonic   | nonsynonymous SNV | TNNT2:NM_001001432:exon14:c.C814T:p.R272C,TNNT2:NM_001001431:exon15:c.C823T:p.R275C,TNNT2:NM_001276346:exon15:c.C733T:p.R245C,TNNT2:NM_000364:exon16:c.C853T:p.R285C,TNNT2:NM_001001430:exon16:c.C832T:p.R278C,TNNT2:NM_001276347:exon16:c.C832T:p.R278C,TNNT2:NM_001276345:exon17:c.C862T:p.R288C                                                                            | 1.675 | 0.0005   | 0.0007   | 0.0004   | Fam31_f_m_aM_uF     | 0/1/0/0/0/1/0/0     |
| chr1 | 201648708 | 201648708 | G | C | NAV1     | exonic   | nonsynonymous SNV | NAV1:NM_020443:exon1:c.G40C:p.E14Q                                                                                                                                                                                                                                                                                                                                            | 1.656 | 0.0001   | .        | 1.40E-05 | Fam105_f_m_aM       | 0/0/0/1/0/1         |
| chr1 | 201648979 | 201648979 | T | C | NAV1     | exonic   | nonsynonymous SNV | NAV1:NM_020443:exon1:c.T311C:p.L104P                                                                                                                                                                                                                                                                                                                                          | 2.339 | .        | .        | .        | Fam12_f_m_aM_uM_aM  | 0/0/0/1/0/0/0/1/0/1 |
| chr1 | 201788549 | 201788549 | G | T | NAV1     | exonic   | nonsynonymous SNV | NAV1:NM_001167738:exon8:c.G1904T:p.S635I,NAV1:NM_020443:exon10:c.G3077T:p.S1026I                                                                                                                                                                                                                                                                                              | 1.014 | .        | 8.94E-05 | 3.49E-05 | Fam25_f_m_aM        | 0/1/0/0/0/1         |
| chr1 | 202280797 | 202280797 | C | T | LGR6     | exonic   | nonsynonymous SNV | LGR6:NM_001017403:exon6:c.C661T:p.R221C,LGR6:NM_021636:exon6:c.C505T:p.R169C                                                                                                                                                                                                                                                                                                  | 1.001 | .        | 7.46E-05 | .        | Fam37_f_m_aF_uM     | 0/0/0/1/0/1/0/0     |
| chr1 | 202318462 | 202318462 | A | G | LGR6     | exonic   | nonsynonymous SNV | LGR6:NM_001017404:exon16:c.A1742G:p.Y581C,LGR6:NM_001017403:exon18:c.A2159G:p.Y720C,LGR6:NM_021636:exon18:c.A2003G:p.Y668C                                                                                                                                                                                                                                                    | 1.018 | .        | .        | .        | Fam91_m_aM_dM_aM_dM | 0/0/0/1/0/1/0/0/0/1 |
| chr1 | 202919843 | 202919843 | T | G | KLHL12   | exonic   | nonsynonymous SNV | KLHL12:NM_001303051:exon3:c.A375C:p.L125F,KLHL12:NM_001303109:exon3:c.A261C:p.L87F,KLHL12:NM_021633:exon3:c.A261C:p.L87F                                                                                                                                                                                                                                                      | 1.82  | .        | .        | .        | Fam97_f_m_aM_aF     | 0/0/0/1/0/1/0/1     |
| chr1 | 203022942 | 203022942 | C | T | TMEM183A | exonic   | nonsynonymous SNV | TMEM183A:NM_001322958:exon7:c.C943T:p.R315C,TMEM183A:NM_001322959:exon7:c.C940T:p.R314C,TMEM183A:NM_001349859:exon7:c.C736T:p.R246C,TMEM183A:NM_001349862:exon7:c.C733T:p.R245C,TMEM183A:NM_001322955:exon8:c.C1022T:p.A341V,TMEM183A:NM_001322956:exon8:c.C1030T:p.R344C,TMEM183A:NM_001322957:exon8:c.C1025T:p.A342V,TMEM183A:NM_138391:exon8:c.C1033T:p.R345C              | 2.372 | .        | 9.83E-05 | 7.02E-06 | Fam96_f_m_aM_uF     | 0/1/0/0/0/1/0/1     |
| chr1 | 203060284 | 203060284 | T | C | PPFIA4   | exonic   | nonsynonymous SNV | PPFIA4:NM_001304331:exon22:c.T2651C:p.M884T,PPFIA4:NM_001304332:exon22:c.T2651C:p.M884T                                                                                                                                                                                                                                                                                       | 1.417 | .        | .        | .        | Fam54_f_m_aM_uF     | 0/0/0/1/0/1/0/0     |

|      |           |           |   |   |          |        |                   |                                                                                                                                                                                                                                                                |       |   |          |          |          |                     |                     |
|------|-----------|-----------|---|---|----------|--------|-------------------|----------------------------------------------------------------------------------------------------------------------------------------------------------------------------------------------------------------------------------------------------------------|-------|---|----------|----------|----------|---------------------|---------------------|
| chr1 | 203700266 | 203700266 | G | C | ATP2B4   | exonic | nonsynonymous SNV | ATP2B4:NM_001001396:exon5:c.G710C;p.S237T,ATP2B4:NM_001365783:exon5:c.G710C;p.S237T,ATP2B4:NM_001365784:exon5:c.G710C;p.S237T,ATP2B4:NM_001684:exon5:c.G710C;p.S237T                                                                                           | 1.229 | . | .        | .        | .        | Fam71_f_m_aF        | 0/0;0/1;0/1         |
| chr1 | 203700809 | 203700809 | A | G | ATP2B4   | exonic | nonsynonymous SNV | ATP2B4:NM_001001396:exon6:c.A787G;p.M263V,ATP2B4:NM_001365783:exon6:c.A787G;p.M263V,ATP2B4:NM_001365784:exon6:c.A787G;p.M263V,ATP2B4:NM_001684:exon6:c.A787G;p.M263V                                                                                           | 1.29  | . | .        | 1.12E-05 | .        | Fam44_f_m_aM_uF     | 0/1;0/0;0/1;0/0     |
| chr1 | 204449901 | 204449901 | C | T | PIK3C2B  | exonic | nonsynonymous SNV | PIK3C2B:NM_002646:exon14:c.G2183A;p.R728Q,NFASC:NM_001365986:exon22:c.C2657T;p.T886M,NFASC:NM_001005388:exon23:c.C2669T;p.T890M,NFASC:NM_001160331:exon23:c.C3023T;p.T1008M,NFASC:NM_001160332:exon24:c.C2978T;p.T993M,NFASC:NM_015090:exon24:c.C2978T;p.T993M | 1.072 | . | .        | 0.0001   | 4.89E-05 | Fam34_f_m_aM_uF     | 0/0;0/1;0/1;0/1     |
| chr1 | 204988708 | 204988708 | C | T | NFASC    | exonic | nonsynonymous SNV | 1160331:exon23:c.C3023T;p.T1008M,NFASC:NM_001160332:exon24:c.C2978T;p.T993M,NFASC:NM_015090:exon24:c.C2978T;p.T993M                                                                                                                                            | 1.024 | . | 7.34E-05 | 6.17E-05 | 2.09E-05 | Fam94_f_m_aM        | 0/1;0/0;0/1         |
| chr1 | 205061970 | 205061970 | G | A | CNTN2    | exonic | stopgain          | CNTN2:NM_001346083:exon9:c.G1079A;p.W360X,NM_005076:exon9:c.G1079A;p.W360X                                                                                                                                                                                     | 0.542 | . | .        | .        | .        | Fam81_f_m_aM_uM     | 0/1;0/0;0/1;0/0     |
| chr1 | 205211501 | 205211501 | G | A | DSTYK    | exonic | nonsynonymous SNV | DSTYK:NM_015375:exon1:c.C35T;p.P12L,DSTYK:NM_199462:exon1:c.C35T;p.P12L                                                                                                                                                                                        | 1.141 | . | 0.0002   | 0.0002   | 4.89E-05 | Fam107_f_m_aM       | 0/0;0/1;0/1         |
| chr1 | 205269052 | 205269052 | C | G | TMCC2    | exonic | nonsynonymous SNV | TMCC2:NM_001297611:exon2:c.C175G;p.R59G,TMCC2:NM_001297613:exon2:c.C130G;p.R44G,TMCC2:NM_001331034:exon2:c.C265G;p.R89G,TMCC2:NM_001242925:exon3:c.C616G;p.R206G,TMCC2:NM_014858:exon3:c.C850G;p.R284G                                                         | 1.756 | . | .        | .        | .        | Fam5_f_m_aM         | 0/0;0/1;0/1         |
| chr1 | 205343543 | 205343543 | C | T | KLHDC8A  | exonic | nonsynonymous SNV | KLHDC8A:NM_018203:exon2:c.G62A;p.R21Q,KLHDC8A:NM_001271864:exon3:c.G62A;p.R21Q,KLHDC8A:NM_001271865:exon4:c.G62A;p.R21Q,KLHDC8A:NM_001271863:exon5:c.G62A;p.R21Q                                                                                               | 1.386 | . | .        | .        | .        | Fam103_f_m_aM       | 0/1;0/0;0/1         |
| chr1 | 205599225 | 205599225 | A | G | MFSD4A   | exonic | nonsynonymous SNV | MFSD4A:NM_181644:exon9:c.A1463G;p.H488R                                                                                                                                                                                                                        | 1.068 | . | .        | 0.0003   | 4.19E-05 | Fam11_f_m_aM_uM     | 0/1;0/0;0/1;0/0     |
| chr1 | 205663534 | 205663534 | C | T | SLC45A3  | exonic | nonsynonymous SNV | SLC45A3:NM_033102:exon3:c.G257A;p.R86Q                                                                                                                                                                                                                         | 1.223 | . | .        | 1.16E-05 | .        | Fam115_f_m_aF_aM_aF | 0/1;0/0;0/1;0/0;0/1 |
| chr1 | 205791709 | 205791709 | G | C | SLC41A1  | exonic | nonsynonymous SNV | SLC41A1:NM_173854:exon11:c.C1366G;p.L456V                                                                                                                                                                                                                      | 1.014 | . | 7.35E-05 | 0.0001   | 4.89E-05 | Fam82_f_m_aM_uF     | 0/0;0/1;0/1;0/0     |
| chr1 | 205798975 | 205798975 | T | C | SLC41A1  | exonic | nonsynonymous SNV | SLC41A1:NM_173854:exon5:c.A679G;p.I227V                                                                                                                                                                                                                        | 1.01  | . | .        | 7.46E-05 | 6.99E-06 | Fam22_f_m_aF_aF_uF  | 0/1;0/0;0/1;0/1;0/1 |
| chr1 | 206595791 | 206595791 | T | C | EIF2D    | exonic | nonsynonymous SNV | EIF2D:NM_001201478:exon11:c.A1064G;p.Q355R,EIF2D:NM_006893:exon13:c.A1436G;p.Q479R                                                                                                                                                                             | 1.086 | . | .        | .        | 1.40E-05 | Fam44_f_m_aM_uF     | 0/1;0/0;0/1;0/0     |
| chr1 | 206934647 | 206934647 | T | G | PIGR     | exonic | nonsynonymous SNV | PIGR:NM_002644:exon6:c.A1478C;p.K493T                                                                                                                                                                                                                          | 1.128 | . | .        | .        | .        | Fam48_f_m_aM_uM     | 0/0;0/1;0/1;0/1     |
| chr1 | 207072267 | 207072267 | A | G | PFKFB2   | exonic | nonsynonymous SNV | PFKFB2:NM_006212:exon15:c.A1414G;p.S472G                                                                                                                                                                                                                       | 1.043 | . | .        | 4.47E-05 | .        | Fam100_f_m_aF       | 0/1;0/0;0/1         |
| chr1 | 211271253 | 211271253 | A | G | RCOR3    | exonic | nonsynonymous SNV | RCOR3:NM_018254:exon2:c.A71G;p.K24R,RCOR3:NM_001136223:exon3:c.A245G;p.K82R,RCOR3:NM_001136224:exon3:c.A245G;p.K82R,RCOR3:NM_001136225:exon3:c.A245G;p.K82R,RCOR3:NM_001350069:exon4:c.A341G;p.K114R                                                           | 1.714 | . | .        | .        | .        | Fam34_f_m_aM_uF     | 0/1;0/0;0/1;0/0     |
| chr1 | 212348492 | 212348492 | G | A | PPP2R5A  | exonic | nonsynonymous SNV | PPP2R5A:NM_001199756:exon7:c.G697A;p.A233T,PPP2R5A:NM_006243:exon7:c.G868A;p.A290T                                                                                                                                                                             | 1.686 | . | .        | 4.57E-05 | .        | Fam18_f_m_aM_uF     | 0/0;0/1;0/1;0/1     |
| chr1 | 212859084 | 212859084 | C | T | FLVCR1   | exonic | nonsynonymous SNV | FLVCR1:NM_014053:exon1:c.C632T;p.S211L                                                                                                                                                                                                                         | 1.804 | . | .        | .        | .        | Fam47_f_m_aM        | 0/0;0/1;0/1         |
| chr1 | 213998177 | 213998177 | G | A | PROX1    | exonic | nonsynonymous SNV | PROX1:NM_001270616:exon2:c.G1642A;p.E548K,PROX1:NM_0022763:exon2:c.G1642A;p.E548K                                                                                                                                                                              | 1.5   | . | .        | .        | .        | Fam119_f_m_aM_aM    | 0/0;0/1;0/1;0/1     |
| chr1 | 215086460 | 215086460 | C | T | KCNK2    | exonic | nonsynonymous SNV | KCNK2:NM_001017424:exon2:c.C127T;p.R43W,KCNK2:NM_001017425:exon2:c.C139T;p.R47W,KCNK2:NM_014217:exon2:c.C94T;p.R32W                                                                                                                                            | 1.575 | . | .        | .        | .        | Fam25_f_m_aM        | 0/0;0/1;0/1         |
| chr1 | 215604162 | 215604162 | A | G | KCTD3    | exonic | nonsynonymous SNV | KCTD3:NM_001319294:exon13:c.A1169G;p.Y390C,KCTD3:NM_001319295:exon13:c.A863G;p.Y288C,KCTD3:NM_016121:exon13:c.A1169G;p.Y390C                                                                                                                                   | 2.087 | . | .        | .        | .        | Fam103_f_m_aM       | 0/0;0/1;0/1         |
| chr1 | 218405222 | 218405222 | G | A | TGFB2    | exonic | nonsynonymous SNV | TGFB2:NM_003238:exon2:c.G400A;p.V134I,TGFB2:NM_001135599:exon3:c.G484A;p.V162I                                                                                                                                                                                 | 1.575 | . | 7.34E-05 | 3.35E-05 | 2.79E-05 | Fam25_f_m_aM        | 0/1;0/0;0/1         |
| chr1 | 219928172 | 219928172 | G | A | SLC30A10 | exonic | nonsynonymous SNV | SLC30A10:NM_018713:exon1:c.C269T;p.T90I                                                                                                                                                                                                                        | 1.756 | . | .        | 0.001    | 0.0002   | Fam106_f_m_aM       | 0/1;0/0;0/1         |
| chr1 | 220074002 | 220074002 | G | A | BPNT1    | exonic | nonsynonymous SNV | BPNT1:NM_001286149:exon2:c.C25T;p.R9W,BPNT1:NM_01286151:exon2:c.C25T;p.R9W,BPNT1:NM_001286150:exon3:c.C190T;p.R64W,BPNT1:NM_006085:exon3:c.C190T;p.R64W                                                                                                        | 1.024 | . | 0.0003   | 0.0005   | 0.0002   | Fam63_f_m_aF        | 0/1;0/0;0/1         |
| chr1 | 220696723 | 220696723 | G | A | C1orf115 | exonic | nonsynonymous SNV | C1orf115:NM_024709:exon2:c.G421A;p.V141M                                                                                                                                                                                                                       | 1.032 | . | .        | 0.0004   | 5.58E-05 | Fam57_f_m_aM_uF     | 0/1;0/0;0/1;0/0     |
| chr1 | 220880356 | 220880356 | C | T | HLX      | exonic | nonsynonymous SNV | HLX:NM_021958:exon1:c.C499T;p.P167S                                                                                                                                                                                                                            | 1.306 | . | 7.35E-05 | 0.0002   | 0.0002   | Fam71_f_m_aF        | 0/0;0/1;0/1         |
| chr1 | 224393929 | 224393929 | C | T | WDR26    | exonic | nonsynonymous SNV | WDR26:NM_001115113:exon13:c.G1811A;p.S604N,WDR26:NM_025160:exon13:c.G1859A;p.S620N                                                                                                                                                                             | 1.988 | . | .        | 6.17E-05 | 6.98E-06 | Fam117_f_m_aM_aF    | 0/1;0/0;0/0;0/1     |
| chr1 | 226154826 | 226154826 | A | G | ACBD3    | exonic | nonsynonymous SNV | ACBD3:NM_022735:exon6:c.T911C;p.L304S                                                                                                                                                                                                                          | 1.767 | . | .        | 3.53E-05 | 1.40E-05 | Fam55_f_m_aM_aM_dM  | 0/0;0/1;0/0;0/1;0/0 |
| chr1 | 226161618 | 226161618 | C | T | ACBD3    | exonic | nonsynonymous SNV | ACBD3:NM_022735:exon4:c.G641A;p.R214H                                                                                                                                                                                                                          | 1.182 | . | 7.34E-05 | 0.0004   | 0.0002   | Fam23_f_m_aM_dF_uFs | 0/1;0/0;0/1;0/0;0/0 |
| chr1 | 227028708 | 227028708 | G | A | CDC42BPA | exonic | stopgain          | CDC42BPA:NM_001366010:exon28:c.C4192T;p.R1398X,CD42BPA:NM_014826:exon28:c.C4033T;p.R1345X,CD42BPA:NM_001366011:exon29:c.C4216T;p.R1406X,CD42BPA:NM_003607:exon29:c.C4276T;p.R1426X,CD42BPA:NM_01366019:exon30:c.C4315T;p.R1439X                                | 0.455 | . | .        | 1.14E-05 | 6.98E-06 | Fam18_f_m_aM_uF     | 0/1;0/0;0/1;0/0     |
| chr1 | 228147476 | 228147476 | C | T | GUK1     | exonic | nonsynonymous SNV | GUK1:NM_001159390:exon5:c.C385T;p.R129W,GUK1:NM_001159391:exon5:c.C322T;p.R108W,GUK1:NM_001242839:exon5:c.C322T;p.R108W,GUK1:NM_001242840:exon5:c.C385T;p.R129W,GUK1:NM_000858:exon6:c.C322T;p.R108W                                                           | 1.021 | . | .        | 7.46E-05 | 1.40E-05 | Fam94_f_m_aM        | 0/0;0/1;0/1         |
| chr1 | 228212318 | 228212318 | G | A | OBSCN    | exonic | nonsynonymous SNV | OBSCN:NM_001098623:exon2:c.G535A;p.G179S,OBSCN:NM_001271223:exon2:c.G535A;p.G179S,OBSCN:NM_052843:exon2:c.G535A;p.G179S                                                                                                                                        | 1.156 | . | 0.0003   | .        | 2.16E-05 | Fam66_f_m_aM        | 0/0;0/1;0/1         |

|       |           |           |   |   |         |          |                   |                                                                                                                                                                                                                                                                                                                                                                                                                                                                                                                                                                                                                                                                                                                                                                                                                                                                                                                                                                                                                                                                                                                                                                                                                                                                                                                                                                                                                                                                                                                                                                           |       |          |          |          |                    |                     |
|-------|-----------|-----------|---|---|---------|----------|-------------------|---------------------------------------------------------------------------------------------------------------------------------------------------------------------------------------------------------------------------------------------------------------------------------------------------------------------------------------------------------------------------------------------------------------------------------------------------------------------------------------------------------------------------------------------------------------------------------------------------------------------------------------------------------------------------------------------------------------------------------------------------------------------------------------------------------------------------------------------------------------------------------------------------------------------------------------------------------------------------------------------------------------------------------------------------------------------------------------------------------------------------------------------------------------------------------------------------------------------------------------------------------------------------------------------------------------------------------------------------------------------------------------------------------------------------------------------------------------------------------------------------------------------------------------------------------------------------|-------|----------|----------|----------|--------------------|---------------------|
| chr1  | 229295894 | 229295894 | G | A | RAB4A   | exonic   | nonsynonymous SNV | RAB4A:NM_004578:exon4:c.G274A:p.V92I                                                                                                                                                                                                                                                                                                                                                                                                                                                                                                                                                                                                                                                                                                                                                                                                                                                                                                                                                                                                                                                                                                                                                                                                                                                                                                                                                                                                                                                                                                                                      | 1.255 | 7.34E-05 | 6.70E-05 | 5.59E-05 | Fam1_f_m_aM        | 0/0/0/1/0/1         |
| chr1  | 229547600 | 229547600 | G | A | ABCB10  | exonic   | nonsynonymous SNV | ABCB10:NM_012089:exon3:c.C820T:p.R274C                                                                                                                                                                                                                                                                                                                                                                                                                                                                                                                                                                                                                                                                                                                                                                                                                                                                                                                                                                                                                                                                                                                                                                                                                                                                                                                                                                                                                                                                                                                                    | 1.362 |          | 2.23E-05 | 6.98E-06 | Fam5_f_m_aM        | 0/0/0/1/0/1         |
| chr1  | 229549344 | 229549344 | G | T | ABCB10  | exonic   | nonsynonymous SNV | ABCB10:NM_012089:exon2:c.C608A:p.P203H                                                                                                                                                                                                                                                                                                                                                                                                                                                                                                                                                                                                                                                                                                                                                                                                                                                                                                                                                                                                                                                                                                                                                                                                                                                                                                                                                                                                                                                                                                                                    | 1.162 |          | 3.28E-05 | 6.98E-06 | Fam55_f_m_aM_aM_dM | 0/0/0/1/0/1/0/0/0/1 |
| chr1  | 229594314 | 229594314 | C | G | TAF5L   | exonic   | nonsynonymous SNV | TAF5L:NM_014409:exon5:c.G1753C:p.E585Q                                                                                                                                                                                                                                                                                                                                                                                                                                                                                                                                                                                                                                                                                                                                                                                                                                                                                                                                                                                                                                                                                                                                                                                                                                                                                                                                                                                                                                                                                                                                    | 1.45  |          |          | 6.98E-06 | Fam95_f_m_aM_aM_uF | 0/0/0/1/0/1/0/1/0/0 |
| chr1  | 230262614 | 230262614 | A | C | GALNT2  | exonic   | nonsynonymous SNV | GALNT2:NM_001291866:exon12:c.A1064C:p.K355T,GALNT2:NM_004481:exon12:c.A1178C:p.K393T<br>TTC13:NM_001122835:exon18:c.T2134C:p.S712P,TTC13:NM_024525:exon20:c.T2296C:p.S766P                                                                                                                                                                                                                                                                                                                                                                                                                                                                                                                                                                                                                                                                                                                                                                                                                                                                                                                                                                                                                                                                                                                                                                                                                                                                                                                                                                                                | 1.61  |          |          |          | Fam6_f_m_aM        | 0/1/0/0/0/1         |
| chr1  | 230911483 | 230911483 | A | G | TTC13   | exonic   | nonsynonymous SNV | TRIM67:NM_001004342:exon8:c.G1948A:p.V650M,TRIM67:NM_001300889:exon10:c.G1762A:p.V588M                                                                                                                                                                                                                                                                                                                                                                                                                                                                                                                                                                                                                                                                                                                                                                                                                                                                                                                                                                                                                                                                                                                                                                                                                                                                                                                                                                                                                                                                                    | 1.078 |          | 1.15E-05 | 6.98E-06 | Fam123_f_aF        | 0/1/0/1             |
| chr1  | 231209075 | 231209075 | G | A | TRIM67  | exonic   | nonsynonymous SNV | TRIM67:NM_001004342:exon8:c.T2075C:p.V692A,TRIM67:NM_001300889:exon10:c.T1889C:p.V630A                                                                                                                                                                                                                                                                                                                                                                                                                                                                                                                                                                                                                                                                                                                                                                                                                                                                                                                                                                                                                                                                                                                                                                                                                                                                                                                                                                                                                                                                                    | 1.318 |          | 7.87E-05 | 2.09E-05 | Fam121_f_m_aF_aM   | 0/0/0/1/0/1/0/1     |
| chr1  | 231209202 | 231209202 | T | C | TRIM67  | exonic   | nonsynonymous SNV | MAP3K21:NM_032435:exon1:c.C679G:p.R227G                                                                                                                                                                                                                                                                                                                                                                                                                                                                                                                                                                                                                                                                                                                                                                                                                                                                                                                                                                                                                                                                                                                                                                                                                                                                                                                                                                                                                                                                                                                                   | 1.692 |          | 2.36E-05 | 6.98E-06 | Fam101_f_m_aM      | 0/1/0/0/0/1         |
| chr1  | 233328707 | 233328707 | C | G | MAP3K21 | exonic   | nonsynonymous SNV | MAP3K21:NM_032435:exon3:c.G1018A:p.G340R                                                                                                                                                                                                                                                                                                                                                                                                                                                                                                                                                                                                                                                                                                                                                                                                                                                                                                                                                                                                                                                                                                                                                                                                                                                                                                                                                                                                                                                                                                                                  | 3.099 |          |          |          | Fam6_f_m_aM        | 0/1/0/0/0/1         |
| chr1  | 233353838 | 233353838 | G | A | MAP3K21 | exonic   | nonsynonymous SNV | KCNK1:NM_002245:exon2:c.C491T:p.P164L                                                                                                                                                                                                                                                                                                                                                                                                                                                                                                                                                                                                                                                                                                                                                                                                                                                                                                                                                                                                                                                                                                                                                                                                                                                                                                                                                                                                                                                                                                                                     | 1.935 | 7.34E-05 | 0.0002   | 0.0001   | Fam90_f_m_aF_dM    | 0/0/0/1/0/1/0/0     |
| chr1  | 233666730 | 233666730 | C | T | KCNK1   | exonic   | nonsynonymous SNV | TARBP1:NM_005646:exon1:c.C173G:p.P58R                                                                                                                                                                                                                                                                                                                                                                                                                                                                                                                                                                                                                                                                                                                                                                                                                                                                                                                                                                                                                                                                                                                                                                                                                                                                                                                                                                                                                                                                                                                                     | 1.177 | 7.35E-05 | 1.12E-05 |          | Fam80_f_m_aM_uM    | 0/0/0/1/0/1/0/0     |
| chr1  | 234478931 | 234478931 | G | C | TARBP1  | exonic   | nonsynonymous SNV | TARBP1:NM_005646:exon1:c.C40T:p.R14W                                                                                                                                                                                                                                                                                                                                                                                                                                                                                                                                                                                                                                                                                                                                                                                                                                                                                                                                                                                                                                                                                                                                                                                                                                                                                                                                                                                                                                                                                                                                      | 1.219 |          | 5.46E-05 | 1.41E-05 | Fam15_f_m_aM_aM    | 0/1/0/0/0/1/0/0     |
| chr1  | 234479064 | 234479064 | G | A | TARBP1  | exonic   | nonsynonymous SNV | EDARADD:NM_080738:exon2:c.G71A:p.S24N,EDARADD:NM_145861:exon2:c.G101A:p.S34N                                                                                                                                                                                                                                                                                                                                                                                                                                                                                                                                                                                                                                                                                                                                                                                                                                                                                                                                                                                                                                                                                                                                                                                                                                                                                                                                                                                                                                                                                              | 1.745 |          | 0.0001   | 1.40E-05 | Fam31_f_m_aM_uF    | 0/0/0/1/0/1/0/1     |
| chr1  | 236409255 | 236409255 | G | A | EDARADD | exonic   | nonsynonymous SNV | MTR:NM_001291940:exon13:c.G7C:p.A3P,MTR:NM_000254:exon14:c.G1228C:p.A410P,MTR:NM_001291939:exon14:c.G1228C:p.A410P                                                                                                                                                                                                                                                                                                                                                                                                                                                                                                                                                                                                                                                                                                                                                                                                                                                                                                                                                                                                                                                                                                                                                                                                                                                                                                                                                                                                                                                        | 1.525 | 7.35E-05 |          | 7.12E-06 | Fam9_f_m_aM_dM_uF  | 0/0/0/1             |
| chr1  | 236835586 | 236835586 | G | C | MTR     | exonic   | nonsynonymous SNV | RYZ2:NM_001035:exon14:c.G1215T:p.L405F                                                                                                                                                                                                                                                                                                                                                                                                                                                                                                                                                                                                                                                                                                                                                                                                                                                                                                                                                                                                                                                                                                                                                                                                                                                                                                                                                                                                                                                                                                                                    | 1.423 |          |          |          | Fam114_f_m_aM      | 0/1/0/0/0/1         |
| chr1  | 237445445 | 237445445 | G | T | RYZ2    | exonic   | nonsynonymous SNV | RYZ2:NM_001035:exon23:c.A2711G:p.Y904C                                                                                                                                                                                                                                                                                                                                                                                                                                                                                                                                                                                                                                                                                                                                                                                                                                                                                                                                                                                                                                                                                                                                                                                                                                                                                                                                                                                                                                                                                                                                    | 1.169 |          |          |          | Fam78_f_m_aF_uM    | 0/1/0/0/0/1         |
| chr1  | 237506807 | 237506807 | A | G | RYZ2    | exonic   | nonsynonymous SNV | RYZ2:NM_001035:exon38:c.T5825G:p.F1942C                                                                                                                                                                                                                                                                                                                                                                                                                                                                                                                                                                                                                                                                                                                                                                                                                                                                                                                                                                                                                                                                                                                                                                                                                                                                                                                                                                                                                                                                                                                                   | 1.286 | 0.0003   | 0.0001   | 0.0002   | Fam63_f_m_aF       | 0/0/0/1/0/1/0/1     |
| chr1  | 237617395 | 237617395 | T | G | RYZ2    | exonic   | nonsynonymous SNV | SCCPDH:NM_016002:exon1:c.C20T:p.P7L                                                                                                                                                                                                                                                                                                                                                                                                                                                                                                                                                                                                                                                                                                                                                                                                                                                                                                                                                                                                                                                                                                                                                                                                                                                                                                                                                                                                                                                                                                                                       | 1.264 |          | 6.74E-05 |          | Fam61_f_m_aM       | 0/1/0/0/0/1         |
| chr1  | 246724442 | 246724442 | C | T | SCCPDH  | exonic   | nonsynonymous SNV | SCCPDH:NM_016002:exon1:c.C20T:p.P7L                                                                                                                                                                                                                                                                                                                                                                                                                                                                                                                                                                                                                                                                                                                                                                                                                                                                                                                                                                                                                                                                                                                                                                                                                                                                                                                                                                                                                                                                                                                                       | 1.295 | 0.0005   | 0.001    | 0.0007   | Fam61_f_m_aM       | 0/0/0/1/0/1         |
| chr1  | 246724442 | 246724442 | C | T | SCCPDH  | exonic   | nonsynonymous SNV | AHCTF1:NM_001323342:exon7:c.G938A:p.C313Y,AHCTF1:NM_001323343:exon7:c.G938A:p.C313Y,AHCTF1:NM_015446:exon7:c.G965A:p.C322Y                                                                                                                                                                                                                                                                                                                                                                                                                                                                                                                                                                                                                                                                                                                                                                                                                                                                                                                                                                                                                                                                                                                                                                                                                                                                                                                                                                                                                                                | 1.295 | 0.0005   | 0.001    | 0.0007   | Fam33_f_m_aM_uM    | 0/1/0/0/0/1/0/1     |
| chr1  | 246903977 | 246903977 | C | T | AHCTF1  | exonic   | nonsynonymous SNV |                                                                                                                                                                                                                                                                                                                                                                                                                                                                                                                                                                                                                                                                                                                                                                                                                                                                                                                                                                                                                                                                                                                                                                                                                                                                                                                                                                                                                                                                                                                                                                           | 1.13  |          |          |          | Fam60_f_m_aF       | 0/1/0/0/0/1         |
| chr1  | 247329616 | 247329616 | C | G | ZNF496  | splicing |                   |                                                                                                                                                                                                                                                                                                                                                                                                                                                                                                                                                                                                                                                                                                                                                                                                                                                                                                                                                                                                                                                                                                                                                                                                                                                                                                                                                                                                                                                                                                                                                                           | 0.3   | 0.0001   | 6.91E-05 | 6.28E-05 | Fam31_f_m_aM_uF    | 0/0/0/1/0/1/0/0     |
| chr1  | 247424347 | 247424347 | G | T | NLRP3   | exonic   | nonsynonymous SNV | NLRP3:NM_001127462:exon3:c.G904T:p.D302Y,NLRP3:NM_001243133:exon3:c.G898T:p.D300Y,NLRP3:NM_004895:exon3:c.G904T:p.D302Y,NLRP3:NM_183395:exon3:c.G904T:p.D302Y,NLRP3:NM_001127461:exon4:c.G904T:p.D302Y,NLRP3:NM_001079821:exon5:c.G904T:p.D302Y                                                                                                                                                                                                                                                                                                                                                                                                                                                                                                                                                                                                                                                                                                                                                                                                                                                                                                                                                                                                                                                                                                                                                                                                                                                                                                                           | 1.497 |          |          |          | Fam65_f_m_aM_uF_dF | 0/1/0/0/0/1/0/0/0/0 |
| chr1  | 248812298 | 248812298 | G | T | SH3BP5L | exonic   | nonsynonymous SNV | SH3BP5L:NM_001322463:exon7:c.C427A:p.R143S,SH3BP5L:NM_001322464:exon7:c.C283A:p.R95S,SH3BP5L:NM_030645:exon7:c.C784A:p.R262S,SH3BP5L:NM_001322462:exon9:c.C427A:p.R143S                                                                                                                                                                                                                                                                                                                                                                                                                                                                                                                                                                                                                                                                                                                                                                                                                                                                                                                                                                                                                                                                                                                                                                                                                                                                                                                                                                                                   | 1.392 | 7.36E-05 | 2.24E-05 |          | Fam66_f_m_aM       | 0/0/0/1/0/1         |
| chr10 | 247438    | 247438    | G | A | ZMYND11 | exonic   | nonsynonymous SNV | ZMYND11:NM_001370122:exon9:c.G893A:p.R298H,ZMYND11:NM_001370124:exon9:c.G728A:p.R243H,ZMYND11:NM_001202465:exon10:c.G944A:p.R315H,ZMYND11:NM_01202467:exon10:c.G1037A:p.R346H,ZMYND11:NM_001370110:exon10:c.G944A:p.R315H,ZMYND11:NM_001370120:exon10:c.G971A:p.R324H,ZMYND11:NM_001370121:exon10:c.G917A:p.R306H,ZMYND11:NM_001370123:exon10:c.G842A:p.R281H,ZMYND11:NM_001202464:exon11:c.G1037A:p.R346H,ZMYND11:NM_001202466:exon11:c.G1034A:p.R345H,ZMYND11:NM_001202468:exon11:c.G1199A:p.R400H,ZMYND11:NM_001370103:exon11:c.G1037A:p.R346H,ZMYND11:NM_001370104:exon11:c.G1037A:p.R346H,ZMYND11:NM_001370105:exon11:c.G1037A:p.R346H,ZMYND11:NM_001370106:exon11:c.G1037A:p.R346H,ZMYND11:NM_001370107:exon11:c.G1037A:p.R346H,ZMYND11:NM_001370108:exon11:c.G1037A:p.R346H,ZMYND11:NM_001370109:exon11:c.G1037A:p.R346H,ZMYND11:NM_001370111:exon11:c.G1034A:p.R345H,ZMYND11:NM_001370113:exon11:c.G1106A:p.R369H,ZMYND11:NM_001370114:exon11:c.G1106A:p.R369H,ZMYND11:NM_001370116:exon11:c.G1133A:p.R378H,ZMYND11:NM_001370118:exon11:c.G1079A:p.R360H,ZMYND11:NM_001370097:exon12:c.G1199A:p.R400H,ZMYND11:NM_001370098:exon12:c.G1199A:p.R400H,ZMYND11:NM_001370099:exon12:c.G1199A:p.R400H,ZMYND11:NM_001370100:exon12:c.G1199A:p.R400H,ZMYND11:NM_001370101:exon12:c.G1199A:p.R400H,ZMYND11:NM_001370102:exon12:c.G1199A:p.R400H,ZMYND11:NM_001370115:exon12:c.G1196A:p.R399H,ZMYND11:NM_006624:exon12:c.G1199A:p.R400H,ZMYND11:NM_212479:exon12:c.G1196A:p.R399H,ZMYND11:NM_001330057:exon13:c.G1148A:p.R383H,ZMYND11:NM_001370112:exon13:c.G1148A:p.R383H | 2.047 | 0.0003   | 1.12E-05 | 2.79E-05 | Fam66_f_m_aM       | 0/0/0/1/0/1         |
| chr10 | 1185019   | 1185019   | G | A | ADARB2  | exonic   | nonsynonymous SNV | ADARB2:NM_018702:exon9:c.C1885T:p.R629C                                                                                                                                                                                                                                                                                                                                                                                                                                                                                                                                                                                                                                                                                                                                                                                                                                                                                                                                                                                                                                                                                                                                                                                                                                                                                                                                                                                                                                                                                                                                   | 1.151 | 0.0005   | 0.0006   | 0.0006   | Fam13_f_m_aM       | 0/0/0/1/0/1         |

|       |          |          |   |   |               |        |                     |                                                                                                                                                                                                                                                                                                                       |       |          |          |          |                      |                     |
|-------|----------|----------|---|---|---------------|--------|---------------------|-----------------------------------------------------------------------------------------------------------------------------------------------------------------------------------------------------------------------------------------------------------------------------------------------------------------------|-------|----------|----------|----------|----------------------|---------------------|
| chr10 | 5452371  | 5452371  | G | A | NET1          | exonic | nonsynonymous SNV   | NET1:NM_005863:exon3:c.G215A:p.R72H,NET1:NM_001047160:exon5:c.G377A:p.R126H                                                                                                                                                                                                                                           | 1.019 | 0.0008   | 0.0008   | 0.0004   | Fam99_f_m_aM_aM      | 0/1;0/0;0/1;0/1     |
| chr10 | 5936572  | 5936572  | G | C | FBH1          | exonic | nonsynonymous SNV   | FBH1:NM_178150:exon20:c.G2946C:p.K982N,FBH1:NM_01258452:exon21:c.G2775C:p.K925N,FBH1:NM_001258453:exon21:c.G2724C:p.K908N,FBH1:NM_032807:exon21:c.G3099C:p.K1033N                                                                                                                                                     | 1.822 | 0.0001   | 5.58E-05 | 8.38E-05 | Fam110_f_m_aM_aM_uMs | 0/1;0/0;0/0;0/1;0/0 |
| chr10 | 6224199  | 6224199  | C | T | PFKFB3        | exonic | nonsynonymous SNV   | PFKFB3:NM_001145443:exon13:c.C1267T:p.R423W,PFKFB3:NM_001282630:exon13:c.C1369T:p.R457W,PFKFB3:NM_001314063:exon13:c.C1327T:p.R443W,PFKFB3:NM_001323017:exon13:c.C1267T:p.R423W,PFKFB3:NM_001323017:exon13:c.C778T:p.R260W,PFKFB3:NM_001363545:exon13:c.C1327T:p.R443W,PFKFB3:NM_004566:exon13:c.C1327T:p.R443W       | 1.208 |          | 6.17E-05 | 5.58E-05 | Fam59_f_m_aF_uM      | 0/1;0/0;0/1;0/0     |
| chr10 | 6498444  | 6498444  | G | C | PRKCQ         | exonic | nonsynonymous SNV   | PRKCQ:NM_001282645:exon4:c.C119G:p.T405,PRKCQ:NM_001323266:exon4:c.C119G:p.T405,PRKCQ:NM_001242413:exon5:c.C494G:p.T165S,PRKCQ:NM_001282644:exon5:c.C386G:p.T129S,PRKCQ:NM_001323265:exon5:c.C494G:p.T165S,PRKCQ:NM_001323267:exon5:c.C386G:p.T129S,PRKCQ:NM_006257:exon5:c.C494G:p.T165S                             | 1.203 |          | 6.53E-05 | 3.49E-05 | Fam32_f_m_aM_uM      | 0/1;0/0;0/1;0/0     |
| chr10 | 7171013  | 7171013  | T | C | SFMBT2        | exonic | nonsynonymous SNV   | SFMBT2:NM_001018039:exon20:c.A2459G:p.N820S,SFMBT2:NM_001029880:exon20:c.A2459G:p.N820S                                                                                                                                                                                                                               | 1.993 |          | 3.28E-05 | 6.98E-06 | Fam110_f_m_aM_aM_uMs | 0/1;0/0;0/1;0/0;0/1 |
| chr10 | 12828812 | 12828812 | G | - | CAMK1D        | exonic | frameshift deletion | CAMK1D:NM_153498:exon11:c.1083delG:p.V363Sfs*15                                                                                                                                                                                                                                                                       | 0.283 |          | 8.95E-05 | 2.79E-05 | Fam101_f_m_aM        | 0/1;0/0;0/1         |
| chr10 | 13656896 | 13656896 | G | A | FRMD4A        | exonic | nonsynonymous SNV   | FRMD4A:NM_001318338:exon11:c.C1766T:p.P589L,FRMD4A:NM_001318336:exon21:c.C2741T:p.P914L,FRMD4A:NM_001318337:exon21:c.C2792T:p.P931L,FRMD4A:NM_018027:exon22:c.C2693T:p.P898L                                                                                                                                          | 1.088 | 0.0003   | 5.14E-05 | 5.61E-05 | Fam31_f_m_aM_uF      | 0/0;0/1;0/1;0/0     |
| chr10 | 13656914 | 13656914 | T | A | FRMD4A        | exonic | nonsynonymous SNV   | FRMD4A:NM_001318338:exon11:c.A1748T:p.D583V,FRMD4A:NM_001318336:exon21:c.A2723T:p.D908W,FRMD4A:NM_001318337:exon21:c.A2774T:p.D925V,FRMD4A:NM_018027:exon22:c.A2675T:p.D892V                                                                                                                                          | 1.078 |          |          |          | Fam64_f_m_aM         | 0/1;0/0;0/1         |
| chr10 | 15214593 | 15214593 | C | T | FAM171A1      | exonic | nonsynonymous SNV   | FAM171A1:NM_001010924:exon8:c.G995A:p.C332Y                                                                                                                                                                                                                                                                           | 1.196 |          | 0.0002   |          | Fam29_f_m_aF_uM      | 0/1;0/0;0/1;0/1     |
| chr10 | 22329127 | 22329127 | G | A | BMI1;COMMD3-B | exonic | nonsynonymous SNV   | BMI1:NM_005180:exon9:c.G650A:p.R217K,COMMD3-B:NM_001204062:exon13:c.G1079A:p.R360K                                                                                                                                                                                                                                    | 1.226 |          |          |          | Fam118_f_m_aM_aF_uM  | 0/0;0/1;0/1;0/1;0/1 |
| chr10 | 26292956 | 26292956 | G | A | GAD2          | exonic | nonsynonymous SNV   | GAD2:NM_000818:exon15:c.G1549A:p.E517K,GAD2:NM_01134366:exon15:c.G1549A:p.E517K                                                                                                                                                                                                                                       | 1.264 |          |          |          | Fam34_f_m_aM_uF      | 0/0;0/1;0/1;0/0     |
| chr10 | 27114547 | 27114547 | C | T | YME1L1        | exonic | nonsynonymous SNV   | YME1L1:NM_001253866:exon17:c.G1882A:p.E628K,YME1L1:NM_014263:exon18:c.G1981A:p.E661K,YME1L1:NM_139312:exon19:c.G2152A:p.E718K                                                                                                                                                                                         | 1.993 |          |          |          | Fam117_f_m_aM_aF     | 0/0;0/0;0/1;0/0     |
| chr10 | 30451706 | 30451706 | G | A | MAP3K8        | exonic | nonsynonymous SNV   | MAP3K8:NM_001244134:exon5:c.G835A:p.E279K,MAP3K8:NM_001320961:exon5:c.G835A:p.E279K,MAP3K8:NM_005204:exon6:c.G835A:p.E279K                                                                                                                                                                                            | 1.758 |          | 3.34E-05 |          | Fam79_f_m_aM_uM      | 0/0;0/1;0/1;0/1     |
| chr10 | 32923650 | 32923650 | T | C | ITGB1         | exonic | nonsynonymous SNV   | ITGB1:NM_033668:exon6:c.A877G:p.I293V,ITGB1:NM_002211:exon7:c.A877G:p.I293V,ITGB1:NM_133376:exon7:c.A877G:p.I293V                                                                                                                                                                                                     | 1.455 |          |          |          | Fam44_f_m_aM_uF      | 0/0;0/1;0/1;0/0     |
| chr10 | 35566130 | 35566130 | A | T | CCNY          | exonic | nonsynonymous SNV   | CCNY:NM_001282854:exon7:c.A455T:p.N152I,CCNY:NM_01282852:exon8:c.A779T:p.N260I,CCNY:NM_145012:exon9:c.A854T:p.N285I,CCNY:NM_001282853:exon10:c.A692T:p.N231I,CCNY:NM_181698:exon11:c.A692T:p.N231I                                                                                                                    | 1.759 |          |          |          | Fam110_f_m_aM_aM_uMs | 0/0;0/1;0/0;0/1;0/0 |
| chr10 | 43102402 | 43102402 | G | A | RET           | exonic | nonsynonymous SNV   | RET:NM_020630:exon3:c.G398A:p.R133H,RET:NM_020975:exon3:c.G398A:p.R133H                                                                                                                                                                                                                                               | 1.571 | 0.0003   | 0.0007   | 0.0001   | Fam24_f_m_aM_aM      | 0/0;0/1;0/1;0/1     |
| chr10 | 43201929 | 43201929 | A | G | RASGEF1A      | exonic | nonsynonymous SNV   | RASGEF1A:NM_001282862:exon4:c.T362C:p.F121S,RASGEF1A:NM_145313:exon4:c.T338C:p.F113S                                                                                                                                                                                                                                  | 1.3   |          |          |          | Fam88_f_m_aF         | 0/1;0/0;0/1         |
| chr10 | 59806926 | 59806926 | C | T | CCDC6         | exonic | nonsynonymous SNV   | CCDC6:NM_005436:exon6:c.G1000A:p.E334K                                                                                                                                                                                                                                                                                | 2.216 |          |          |          | Fam6_f_m_aM          | 0/0;0/1;0/1         |
| chr10 | 60166650 | 60166650 | C | T | ANK3          | exonic | nonsynonymous SNV   | ANK3:NM_001204404:exon23:c.G2504A:p.R835H,ANK3:NM_001320874:exon23:c.G2555A:p.R852H,ANK3:NM_020987:exon23:c.G2555A:p.R852H,ANK3:NM_001204403:exon24:c.G2537A:p.R846H                                                                                                                                                  | 1.49  | 0.0001   | 0.0008   | 0.0002   | Fam85_f_m_aM_aM      | 0/0;0/1;0/1;0/0     |
| chr10 | 62091385 | 62091385 | C | T | ARID5B        | exonic | nonsynonymous SNV   | ARID5B:NM_001244638:exon7:c.C1193T:p.A398V,ARID5B:NM_032199:exon10:c.C1922T:p.A641V                                                                                                                                                                                                                                   | 1.021 | 7.34E-05 | 3.27E-05 | 2.09E-05 | Fam112_f_m_aM        | 0/0;0/1;0/1         |
| chr10 | 68231512 | 68231512 | G | A | ATOH7         | exonic | nonsynonymous SNV   | ATOH7:NM_145178:exon1:c.C166T:p.L56F                                                                                                                                                                                                                                                                                  | 1.984 | 7.51E-05 | 3.37E-05 | 4.92E-05 | Fam35_f_m_aF_uM      | 0/1;0/0;0/1;0/0     |
| chr10 | 68673044 | 68673044 | A | G | TET1          | exonic | nonsynonymous SNV   | TET1:NM_030625:exon8:c.A4823G:p.H1608R                                                                                                                                                                                                                                                                                | 2.268 |          | 2.24E-05 | 6.98E-06 | Fam67_f_m_aM_uF      | 0/1;0/0;0/1;0/1     |
| chr10 | 68913553 | 68913553 | T | C | DDX50         | exonic | nonsynonymous SNV   | DDX50:NM_024045:exon6:c.T920C:p.I307T                                                                                                                                                                                                                                                                                 | 1.578 | 7.34E-05 |          | 1.40E-05 | Fam121_f_m_aF_aM     | 0/1;0/0;0/1;0/1     |
| chr10 | 69200449 | 69200449 | G | A | SUPV3L1       | exonic | nonsynonymous SNV   | SUPV3L1:NM_001323587:exon10:c.G481A:p.D161N,SUPV3L1:NM_001323588:exon10:c.G481A:p.D161N,SUPV3L1:NM_001323584:exon11:c.G1075A:p.D359N,SUPV3L1:NM_003171:exon11:c.G1468A:p.D490N,SUPV3L1:NM_001301683:exon12:c.G1075A:p.D359N,SUPV3L1:NM_001323586:exon12:c.G1105A:p.D369N,SUPV3L1:NM_001323585:exon13:c.G1105A:p.D369N | 1.002 |          |          |          | Fam48_f_m_aM_uM      | 0/1;0/0;0/1;0/0     |
| chr10 | 69504460 | 69504460 | G | A | TSPAN15       | exonic | nonsynonymous SNV   | TSPAN15:NM_001351263:exon4:c.G332A:p.C111Y,TSPAN15:NM_012339:exon6:c.G593A:p.C198Y                                                                                                                                                                                                                                    | 1.516 |          |          |          | Fam47_f_m_aM         | 0/1;0/0;0/1         |
| chr10 | 73345190 | 73345190 | G | C | CFAP70        | exonic | nonsynonymous SNV   | CFAP70:NM_001367801:exon6:c.C484G:p.Q162E                                                                                                                                                                                                                                                                             | 1.011 |          |          |          | Fam12_f_m_aM_uM_aM   | 0/1;0/0;0/1;0/0;0/1 |
| chr10 | 73760821 | 73760821 | G | A | SEC24C        | exonic | nonsynonymous SNV   | SEC24C:NM_198597:exon6:c.G959A:p.R320H,SEC24C:NM_004922:exon7:c.G959A:p.R320H                                                                                                                                                                                                                                         | 1.442 |          |          | 6.98E-06 | Fam106_f_m_aM        | 0/1;0/0;0/1         |
| chr10 | 73782170 | 73782170 | G | C | CHCHD1        | exonic | nonsynonymous SNV   | CHCHD1:NM_203298:exon1:c.G95C:p.R32P                                                                                                                                                                                                                                                                                  | 1.337 |          | 6.54E-05 | 1.40E-05 | Fam84_f_m_aF         | 0/0;0/1;0/1         |

|       |          |          |   |   |         |          |                   |                                                                                                                                                                                                                                                                                                                                                                                                                                                                                                                                                                                                                                                                                                                                                                                                                                                                                                                                                                                                                                                                                                                                                                                                                                                                                                                                                                                                                                                                                                                                                                                                                                                                                                                                                                              |       |          |          |          |                        |                             |
|-------|----------|----------|---|---|---------|----------|-------------------|------------------------------------------------------------------------------------------------------------------------------------------------------------------------------------------------------------------------------------------------------------------------------------------------------------------------------------------------------------------------------------------------------------------------------------------------------------------------------------------------------------------------------------------------------------------------------------------------------------------------------------------------------------------------------------------------------------------------------------------------------------------------------------------------------------------------------------------------------------------------------------------------------------------------------------------------------------------------------------------------------------------------------------------------------------------------------------------------------------------------------------------------------------------------------------------------------------------------------------------------------------------------------------------------------------------------------------------------------------------------------------------------------------------------------------------------------------------------------------------------------------------------------------------------------------------------------------------------------------------------------------------------------------------------------------------------------------------------------------------------------------------------------|-------|----------|----------|----------|------------------------|-----------------------------|
| chr10 | 73791072 | 73791072 | G | A | ZSWIM8  | exonic   | nonsynonymous SNV | ZSWIM8:NM_001242487:exon8:c.G1039A:p.V347I,ZSWIM8:NM_001242488:exon8:c.G1039A:p.V347I,ZSWIM8:NM_01367799:exon8:c.G1039A:p.V347I,ZSWIM8:NM_015037:exon8:c.G1039A:p.V347I                                                                                                                                                                                                                                                                                                                                                                                                                                                                                                                                                                                                                                                                                                                                                                                                                                                                                                                                                                                                                                                                                                                                                                                                                                                                                                                                                                                                                                                                                                                                                                                                      | 1.139 | 0.0003   | 1.13E-05 | 1.40E-05 | Fam49_f_m_aM           | 0/0;0/1;0/1                 |
| chr10 | 73794564 | 73794564 | C | T | ZSWIM8  | exonic   | nonsynonymous SNV | ZSWIM8:NM_001242487:exon14:c.C2818T:p.P940S,ZSWIM8:NM_001242488:exon14:c.C2818T:p.P940S,ZSWIM8:NM_001367799:exon14:c.C2833T:p.P945S,ZSWIM8:NM_015037:exon14:c.C2833T:p.P945S                                                                                                                                                                                                                                                                                                                                                                                                                                                                                                                                                                                                                                                                                                                                                                                                                                                                                                                                                                                                                                                                                                                                                                                                                                                                                                                                                                                                                                                                                                                                                                                                 | 1.024 |          |          |          | Fam77_f_m_aM_aF_uM_uFs | 0/1;0/0;0/1;0/1;0/1;0/1;0/0 |
| chr10 | 73801121 | 73801121 | G | A | ZSWIM8  | exonic   | nonsynonymous SNV | ZSWIM8:NM_001242488:exon25:c.G5144A:p.R1715H,ZSWIM8:NM_001367799:exon25:c.G5227A:p.A1743T,ZSWIM8:NM_015037:exon25:c.G5251A:p.A1751T                                                                                                                                                                                                                                                                                                                                                                                                                                                                                                                                                                                                                                                                                                                                                                                                                                                                                                                                                                                                                                                                                                                                                                                                                                                                                                                                                                                                                                                                                                                                                                                                                                          | 1.171 | 0.001    | 0.0004   | 0.0003   | Fam77_f_m_aM_aF        | 0/1;0/0;0/1;0/1             |
| chr10 | 73805652 | 73805652 | G | A | NDST2   | exonic   | nonsynonymous SNV | NDST2:NM_001330107:exon8:c.C1681T:p.P561S,NDST2:NM_003635:exon8:c.C1681T:p.P561S                                                                                                                                                                                                                                                                                                                                                                                                                                                                                                                                                                                                                                                                                                                                                                                                                                                                                                                                                                                                                                                                                                                                                                                                                                                                                                                                                                                                                                                                                                                                                                                                                                                                                             | 1.279 |          |          |          | Fam34_f_m_aM_uF        | 0/1;0/0;0/1;0/0             |
| chr10 | 73808060 | 73808060 | C | T | NDST2   | exonic   | nonsynonymous SNV | NDST2:NM_001330107:exon3:c.G329A:p.R110H,NDST2:NM_003635:exon3:c.G329A:p.R110H                                                                                                                                                                                                                                                                                                                                                                                                                                                                                                                                                                                                                                                                                                                                                                                                                                                                                                                                                                                                                                                                                                                                                                                                                                                                                                                                                                                                                                                                                                                                                                                                                                                                                               | 1.427 | 7.34E-05 | 0.0001   | 2.79E-05 | Fam97_f_m_aM_aF        | 0/0;0/1;0/1;0/1             |
| chr10 | 73817551 | 73817551 | C | T | CAMK2G  | exonic   | nonsynonymous SNV | CAMK2G:NM_001367538:exon14:c.G776A:p.R259Q,CAMK2G:NM_001367537:exon15:c.G890A:p.R297Q,CAMK2G:NM_001367540:exon15:c.G422A:p.R141Q,CAMK2G:NM_001222:exon16:c.G1088A:p.R363Q,CAMK2G:NM_001367541:exon16:c.G1088A:p.R363Q,CAMK2G:NM_001367516:exon17:c.G1157A:p.R386Q,CAMK2G:NM_001367517:exon17:c.G1157A:p.R386Q,CAMK2G:NM_001367519:exon17:c.G1121A:p.R374Q,CAMK2G:NM_001367528:exon17:c.G1202A:p.R401Q,CAMK2G:NM_001367529:exon17:c.G1157A:p.R386Q,CAMK2G:NM_001367530:exon17:c.G1121A:p.R374Q,CAMK2G:NM_001367532:exon17:c.G1133A:p.R378Q,CAMK2G:NM_001367539:exon17:c.G1025A:p.R342Q,CAMK2G:NM_001367545:exon17:c.G1202A:p.R401Q,CAMK2G:NM_001367541:exon17:c.G1157A:p.R386Q,CAMK2G:NM_001204492:exon18:c.G1220A:p.R407Q,CAMK2G:NM_001367514:exon18:c.G1247A:p.R416Q,CAMK2G:NM_001367518:exon18:c.G1235A:p.R412Q,CAMK2G:NM_001367520:exon18:c.G1229A:p.R410Q,CAMK2G:NM_001367521:exon18:c.G1220A:p.R407Q,CAMK2G:NM_001367522:exon18:c.G1235A:p.R412Q,CAMK2G:NM_001367523:exon18:c.G1184A:p.R395Q,CAMK2G:NM_001367524:exon18:c.G1052A:p.R351Q,CAMK2G:NM_001367525:exon18:c.G1247A:p.R416Q,CAMK2G:NM_001367527:exon18:c.G1265A:p.R422Q,CAMK2G:NM_001367531:exon18:c.G1190A:p.R397Q,CAMK2G:NM_001367533:exon18:c.G1229A:p.R410Q,CAMK2G:NM_001367535:exon18:c.G1243A:p.E415K,CAMK2G:NM_001367536:exon18:c.G1208A:p.R403Q,CAMK2G:NM_001367536:exon18:c.G1184A:p.R395Q,CAMK2G:NM_001320898:exon19:c.G1298A:p.R433Q,CAMK2G:NM_001367526:exon19:c.G1330A:p.E444K,CAMK2G:NM_001367543:exon19:c.G1253A:p.R418Q,CAMK2G:NM_001367544:exon19:c.G1334A:p.R445Q,CAMK2G:NM_001367546:exon19:c.G1298A:p.R433Q,CAMK2G:NM_001367547:exon19:c.G1298A:p.R433Q,CAMK2G:NM_001367534:exon20:c.G1367A:p.R456Q,CAMK2G:NM_001367542:exon20:c.G581A:p.R194Q,CAMK2G:NM_001367548:exon20:c.G1325A:p.R442Q | 1.802 |          | 3.28E-05 | 1.40E-05 | Fam52_f_m_aM           | 0/1;0/0;0/1                 |
| chr10 | 73824085 | 73824085 | C | G | CAMK2G  | splicing |                   |                                                                                                                                                                                                                                                                                                                                                                                                                                                                                                                                                                                                                                                                                                                                                                                                                                                                                                                                                                                                                                                                                                                                                                                                                                                                                                                                                                                                                                                                                                                                                                                                                                                                                                                                                                              | 0.396 |          |          |          | Fam57_f_m_aM_uF        | 0/1;0/0;0/1;0/0             |
| chr10 | 73912966 | 73912966 | G | A | PLAU    | exonic   | nonsynonymous SNV | PLAU:NM_001145031:exon4:c.G185A:p.R62Q,PLAU:NM_002658:exon5:c.G236A:p.R79Q                                                                                                                                                                                                                                                                                                                                                                                                                                                                                                                                                                                                                                                                                                                                                                                                                                                                                                                                                                                                                                                                                                                                                                                                                                                                                                                                                                                                                                                                                                                                                                                                                                                                                                   | 1.045 | 0.0005   | 0.0005   | 0.0001   | Fam74_f_m_aM_uM        | 0/1;0/0;0/1;0/1             |
| chr10 | 73913604 | 73913604 | C | T | PLAU    | exonic   | nonsynonymous SNV | PLAU:NM_001145031:exon6:c.C475T:p.R159C,PLAU:NM_001319191:exon6:c.C268T:p.R90C,PLAU:NM_002658:exon7:c.C526T:p.R176C                                                                                                                                                                                                                                                                                                                                                                                                                                                                                                                                                                                                                                                                                                                                                                                                                                                                                                                                                                                                                                                                                                                                                                                                                                                                                                                                                                                                                                                                                                                                                                                                                                                          | 1.141 |          | 0.0001   | 6.28E-05 | Fam73_f_m_aF_dM        | 0/0;0/1;0/1;0/1             |
| chr10 | 75037945 | 75037945 | G | A | DUPD1   | exonic   | nonsynonymous SNV | DUPD1:NM_001003892:exon3:c.C554T:p.P185L,KCNMA1:NM_001271518:exon27:c.G3233A:p.R1078Q,KCNMA1:NM_001322832:exon27:c.G3383A:p.R1128Q,KCNMA1:NM_002247:exon27:c.G3383A:p.R1128Q,KCNMA1:NM_001014797:exon28:c.G3395A:p.R1132Q,KCNMA1:NM_001161352:exon28:c.G3557A:p.R1186Q,KCNMA1:NM_001161353:exon28:c.G3506A:p.R1169Q,KCNMA1:NM_001322829:exon28:c.G3392A:p.R1131Q,KCNMA1:NM_001322836:exon28:c.G3392A:p.R1131Q,KCNMA1:NM_001271519:exon29:c.G3473A:p.R1158Q,KCNMA1:NM_001322835:exon29:c.G3476A:p.R1159Q,KCNMA1:NM_001322837:exon29:c.G3476A:p.R1159Q,KCNMA1:NM_001322838:exon29:c.G2930A:p.R977Q,KCNMA1:NM_001322830:exon30:c.G3485A:p.R1162Q                                                                                                                                                                                                                                                                                                                                                                                                                                                                                                                                                                                                                                                                                                                                                                                                                                                                                                                                                                                                                                                                                                                                | 1.144 |          | 6.71E-05 | 1.40E-05 | Fam112_f_m_aM          | 0/0;0/1;0/1                 |
| chr10 | 76887420 | 76887420 | C | T | KCNMA1  | exonic   | nonsynonymous SNV |                                                                                                                                                                                                                                                                                                                                                                                                                                                                                                                                                                                                                                                                                                                                                                                                                                                                                                                                                                                                                                                                                                                                                                                                                                                                                                                                                                                                                                                                                                                                                                                                                                                                                                                                                                              | 1.074 |          | 3.28E-05 |          | Fam28_f_m_aF_uF        | 0/0;0/1;0/1;0/1             |
| chr10 | 79386348 | 79386348 | C | A | ZCCHC24 | exonic   | nonsynonymous SNV | ZCCHC24:NM_153367:exon4:c.G723T:p.Q241H                                                                                                                                                                                                                                                                                                                                                                                                                                                                                                                                                                                                                                                                                                                                                                                                                                                                                                                                                                                                                                                                                                                                                                                                                                                                                                                                                                                                                                                                                                                                                                                                                                                                                                                                      | 1.935 |          |          |          | Fam64_f_m_aM           | 0/1;0/0;0/1                 |
| chr10 | 87094567 | 87094567 | T | G | GLUD1   | exonic   | nonsynonymous SNV | GLUD1:NM_005271:exon1:c.A203C:p.K68T                                                                                                                                                                                                                                                                                                                                                                                                                                                                                                                                                                                                                                                                                                                                                                                                                                                                                                                                                                                                                                                                                                                                                                                                                                                                                                                                                                                                                                                                                                                                                                                                                                                                                                                                         | 1.361 |          | 1.12E-05 |          | Fam11_f_m_aM_uM        | 0/1;0/0;0/1;0/0             |
| chr10 | 91482997 | 91482997 | G | A | HECTD2  | exonic   | nonsynonymous SNV | HECTD2:NM_001284274:exon8:c.G742A:p.V248I,HECTD2:NM_001348365:exon8:c.G421A:p.V141I,HECTD2:NM_182765:exon8:c.G742A:p.V248I                                                                                                                                                                                                                                                                                                                                                                                                                                                                                                                                                                                                                                                                                                                                                                                                                                                                                                                                                                                                                                                                                                                                                                                                                                                                                                                                                                                                                                                                                                                                                                                                                                                   | 1.025 |          |          |          | Fam30_f_m_aM_uM        | 0/0;0/0;0/1;0/0             |

|       |           |           |   |   |         |        |                     |                                                                                                                                                                                                                                                                                                                                                                                                                                                                                   |           |          |          |          |                        |                         |
|-------|-----------|-----------|---|---|---------|--------|---------------------|-----------------------------------------------------------------------------------------------------------------------------------------------------------------------------------------------------------------------------------------------------------------------------------------------------------------------------------------------------------------------------------------------------------------------------------------------------------------------------------|-----------|----------|----------|----------|------------------------|-------------------------|
| chr10 | 91842212  | 91842212  | C | T | TNKS2   | exonic | nonsynonymous SNV   | TNKS2:NM_025235:exon16:c.C1880T;p.T627I                                                                                                                                                                                                                                                                                                                                                                                                                                           | . 1.343 . |          | 0.0003   | 4.89E-05 | Fam109_f_m_aM          | 0/1;0/0;0/1             |
| chr10 | 92609103  | 92609103  | A | C | KIF11   | exonic | nonsynonymous SNV   | KIF11:NM_004523:exon5:c.A471C;p.K157N                                                                                                                                                                                                                                                                                                                                                                                                                                             | . 2.377 . |          |          |          | Fam113_f_m_aF_raM_uF   | 0/0;0/1;0/1;0/0;0/1     |
| chr10 | 93065956  | 93065956  | G | A | CYP26C1 | exonic | nonsynonymous SNV   | CYP26C1:NM_183374:exon5:c.G862A;p.E288K                                                                                                                                                                                                                                                                                                                                                                                                                                           | . 1.833 . | 0.0007   | 0.0005   | 0.0004   | Fam79_f_m_aM_uM        | 0/1;0/0;0/1;0/1         |
| chr10 | 93601674  | 93601674  | G | - | RBP4    | exonic | frameshift deletion | RBP4:NM_001323518:exon1:c.43delC;p.Q15Rfs*8                                                                                                                                                                                                                                                                                                                                                                                                                                       | 0.575 .   |          |          | 6.66E-05 | Fam116_f_m_aM_aF       | 0/1;0/0;0/0;0/1         |
| chr10 | 94403046  | 94403046  | G | C | TBC1D12 | exonic | nonsynonymous SNV   | TBC1D12:NM_015188:exon1:c.G433C;p.D145H<br>HELLS:NM_001289070:exon11:c.C1117T;p.P373S;HELLS:NM_001289072:exon11:c.C1021T;p.P341S;HELLS:NM_001289073:exon12:c.C997T;p.P333S;HELLS:NM_001289075:exon12:c.C193T;p.P65S;HELLS:NM_001289068:exon13:c.C1363T;p.P455S;HELLS:NM_001289069:exon13:c.C1315T;p.P439S;HELLS:NM_018063:exon13:c.C1411T;p.P471S;HELLS:NM_001289067:exon14:c.C1549T;p.P517S;HELLS:NM_001289071:exon14:c.C1039T;p.P347S;HELLS:NM_001289074:exon14:c.C328T;p.P110S | . 1.335 . |          |          |          | Fam101_f_m_aM          | 0/1;0/0;0/1             |
| chr10 | 94588313  | 94588313  | C | T | HELLS   | exonic | nonsynonymous SNV   | HELLS:NM_001289070:exon11:c.C1117T;p.P373S;HELLS:NM_001289072:exon11:c.C1021T;p.P341S;HELLS:NM_001289073:exon12:c.C997T;p.P333S;HELLS:NM_001289075:exon12:c.C193T;p.P65S;HELLS:NM_001289068:exon13:c.C1363T;p.P455S;HELLS:NM_001289069:exon13:c.C1315T;p.P439S;HELLS:NM_018063:exon13:c.C1411T;p.P471S;HELLS:NM_001289067:exon14:c.C1549T;p.P517S;HELLS:NM_001289071:exon14:c.C1039T;p.P347S;HELLS:NM_001289074:exon14:c.C328T;p.P110S                                            | . 1.578 . |          | 2.24E-05 | 4.19E-05 | Fam77_f_m_aM_aF_uM_uFs | 0/1;0/0;0/1;0/1;0/1;0/0 |
| chr10 | 96551263  | 96551263  | A | G | TM9SF3  | exonic | nonsynonymous SNV   | TM9SF3:NM_020123:exon7:c.T941C;p.I314T                                                                                                                                                                                                                                                                                                                                                                                                                                            | . 1.221 . |          |          |          | Fam12_f_m_aM_uM_aM     | 0/0;0/0;0/0;0/0;0/1     |
| chr10 | 96586780  | 96586780  | A | G | TM9SF3  | exonic | nonsynonymous SNV   | TM9SF3:NM_020123:exon1:c.T56C;p.L19P                                                                                                                                                                                                                                                                                                                                                                                                                                              | . 1.481 . | 7.56E-05 | 0.0002   | 0.0001   | Fam23_f_m_aM_dF_uFs    | 0/1;0/0;0/1;0/1;0/0     |
| chr10 | 96651633  | 96651633  | A | T | PIK3AP1 | exonic | nonsynonymous SNV   | PIK3AP1:NM_152309:exon5:c.T731A;p.V244D                                                                                                                                                                                                                                                                                                                                                                                                                                           | . 1.882 . |          |          |          | Fam29_f_m_aF_uM        | 0/0;0/1;0/1;0/0         |
| chr10 | 97001118  | 97001118  | G | T | SLIT1   | exonic | stopgain            | SLIT1:NM_003061:exon37:c.C4599A;p.C1533X                                                                                                                                                                                                                                                                                                                                                                                                                                          | 0.432 .   |          | 1.13E-05 | 6.98E-06 | Fam43_f_m_aM           | 0/1;0/0;0/1             |
| chr10 | 97046694  | 97046694  | G | A | SLIT1   | exonic | nonsynonymous SNV   | SLIT1:NM_003061:exon18:c.C1813T;p.R605W                                                                                                                                                                                                                                                                                                                                                                                                                                           | . 1.332 . |          | 0.0005   | 4.19E-05 | Fam43_f_m_aM           | 0/1;0/0;0/1             |
| chr10 | 97056433  | 97056433  | G | A | SLIT1   | exonic | nonsynonymous SNV   | SLIT1:NM_003061:exon13:c.C1189T;p.R397W                                                                                                                                                                                                                                                                                                                                                                                                                                           | . 1.34 .  |          | 0.0003   | 2.09E-05 | Fam92_f_m_aM_raM       | 0/1;0/0;0/1;0/1         |
| chr10 | 97319820  | 97319820  | G | A | FRAT1   | exonic | nonsynonymous SNV   | FRAT1:NM_005479:exon1:c.G367A;p.G123S                                                                                                                                                                                                                                                                                                                                                                                                                                             | . 2.146 . |          |          |          | Fam34_f_m_aM_uF        | 0/1;0/0;0/1;0/0         |
| chr10 | 97334272  | 97334272  | C | G | FRAT2   | exonic | nonsynonymous SNV   | FRAT2:NM_012083:exon1:c.G301C;p.E101Q                                                                                                                                                                                                                                                                                                                                                                                                                                             | . 2.012 . | 0.0003   |          | 3.57E-05 | Fam25_f_m_aM           | 0/0;0/1;0/1             |
| chr10 | 97401168  | 97401168  | G | A | RRP12   | exonic | nonsynonymous SNV   | RRP12:NM_001145114:exon1:c.C64T;p.H22Y;RRP12:NM_01284337:exon1:c.C64T;p.H22Y;RRP12:NM_015179:exon1:c.C64T;p.H22Y                                                                                                                                                                                                                                                                                                                                                                  | . 1.7 .   |          | 2.24E-05 | 1.40E-05 | Fam107_f_m_aM          | 0/1;0/0;0/1             |
| chr10 | 97673642  | 97673642  | C | T | PI4K2A  | exonic | nonsynonymous SNV   | PI4K2A:NM_018425:exon9:c.C1340T;p.P447L                                                                                                                                                                                                                                                                                                                                                                                                                                           | . 1.47 .  |          | 1.12E-05 |          | Fam117_f_m_aM_aF       | 0/1;0/0;0/1;0/0         |
| chr10 | 97917581  | 97917581  | C | T | CRTAC1  | exonic | nonsynonymous SNV   | CRTAC1:NM_001206528:exon5:c.G634A;p.D212N;CRTAC1:NM_018058:exon5:c.G634A;p.D212N                                                                                                                                                                                                                                                                                                                                                                                                  | . 1.062 . |          | 1.12E-05 |          | Fam9_f_m_aM_dM_uF      | 0/0;0/1;0/1;0/1;0/0     |
| chr10 | 100156163 | 100156163 | G | T | ERLIN1  | exonic | nonsynonymous SNV   | ERLIN1:NM_001347858:exon8:c.C247A;p.R83S;ERLIN1:NM_001347856:exon9:c.C475A;p.R159S;ERLIN1:NM_006459:exon9:c.C727A;p.R243S;ERLIN1:NM_001100626:exon10:c.C727A;p.R243S;ERLIN1:NM_001347857:exon10:c.C727A;p.R243S;ERLIN1:NM_001347859:exon10:c.C727A;p.R243S;ERLIN1:NM_001347860:exon10:c.C727A;p.R243S;ERLIN1:NM_001347861:exon10:c.C727A;p.R243S                                                                                                                                  | . 1.527 . |          |          |          | Fam98_f_m_aM           | 0/1;0/0;0/1             |
| chr10 | 100222882 | 100222882 | C | T | CHUK    | exonic | nonsynonymous SNV   | CHUK:NM_001278:exon3:c.G299A;p.G100E;CHUK:NM_001320928:exon3:c.G299A;p.G100E                                                                                                                                                                                                                                                                                                                                                                                                      | . 1.038 . |          |          |          | Fam29_f_m_aF_uM        | 0/0;0/1;0/1;0/0         |
| chr10 | 100482643 | 100482643 | G | A | WNT8B   | exonic | nonsynonymous SNV   | WNT8B:NM_003393:exon6:c.G883A;p.G295R                                                                                                                                                                                                                                                                                                                                                                                                                                             | . 2.121 . |          | 1.24E-05 |          | Fam96_f_m_aM_uF        | 0/1;0/0;0/1;0/0         |
| chr10 | 100545058 | 100545058 | C | G | HIF1AN  | exonic | nonsynonymous SNV   | HIF1AN:NM_017902:exon4:c.C685G;p.P229A<br>PAX2:NM_000278:exon8:c.C941T;p.T314I;PAX2:NM_003988:exon8:c.C941T;p.T314I;PAX2:NM_003989:exon8:c.C941T;p.T314I;PAX2:NM_001304569:exon9:c.C1034T;p.T345I;PAX2:NM_003987:exon9:c.C1010T;p.T337I;PAX2:NM_003990:exon9:c.C1010T;p.T337I                                                                                                                                                                                                     | . 1.807 . |          | 8.93E-05 | 6.98E-05 | Fam15_f_m_aM_aM        | 0/1;0/0;0/1;0/1         |
| chr10 | 100824669 | 100824669 | C | T | PAX2    | exonic | nonsynonymous SNV   | PAX2:NM_000278:exon8:c.C941T;p.T314I;PAX2:NM_003988:exon8:c.C941T;p.T314I;PAX2:NM_003989:exon8:c.C941T;p.T314I;PAX2:NM_001304569:exon9:c.C1034T;p.T345I;PAX2:NM_003987:exon9:c.C1010T;p.T337I;PAX2:NM_003990:exon9:c.C1010T;p.T337I                                                                                                                                                                                                                                               | . 1.009 . |          |          |          | Fam115_f_m_aF_aM_aF    | 0/1;0/0;0/0;0/0;0/1     |
| chr10 | 101975268 | 101975268 | C | T | ARMH3   | exonic | nonsynonymous SNV   | ARMH3:NM_024541:exon20:c.G1439A;p.C480Y                                                                                                                                                                                                                                                                                                                                                                                                                                           | . 1.817 . |          |          |          | Fam6_f_m_aM            | 0/0;0/1;0/1             |
| chr10 | 102067290 | 102067290 | C | T | HPS6    | exonic | nonsynonymous SNV   | HPS6:NM_024747:exon1:c.C1816T;p.R606C                                                                                                                                                                                                                                                                                                                                                                                                                                             | . 1.604 . |          | 4.58E-05 | 2.09E-05 | Fam109_f_m_aM          | 0/1;0/0;0/1             |
| chr10 | 102421137 | 102421137 | C | T | FBXL15  | exonic | nonsynonymous SNV   | FBXL15:NM_024326:exon1:c.C8T;p.P3L                                                                                                                                                                                                                                                                                                                                                                                                                                                | . 1.09 .  | 7.34E-05 | 0.0005   | 9.07E-05 | Fam37_f_m_aF_uM        | 0/1;0/0;0/1;0/1         |
| chr10 | 103373496 | 103373496 | G | A | TAF5    | exonic | nonsynonymous SNV   | TAF5:NM_006951:exon2:c.G698A;p.R233Q;TAF5:NM_139052:exon2:c.G698A;p.R233Q                                                                                                                                                                                                                                                                                                                                                                                                         | . 1.318 . |          | 1.12E-05 |          | Fam91_m_aM_dM_aM_dM    | 0/1;0/1;0/1;0/0;0/0     |
| chr10 | 103388215 | 103388215 | C | T | TAF5    | exonic | nonsynonymous SNV   | TAF5:NM_139052:exon10:c.C2230T;p.P744S;TAF5:NM_006951:exon11:c.C2395T;p.P799S                                                                                                                                                                                                                                                                                                                                                                                                     | . 1.164 . |          | 1.12E-05 |          | Fam123_f_aF            | 0/1;0/1                 |
| chr10 | 103584907 | 103584907 | A | C | NEURL1  | exonic | nonsynonymous SNV   | NEURL1:NM_004210:exon4:c.A1021C;p.K341Q                                                                                                                                                                                                                                                                                                                                                                                                                                           | . 1.203 . |          |          |          | Fam43_f_m_aM           | 0/0;0/1;0/1             |
| chr10 | 103585006 | 103585006 | C | T | NEURL1  | exonic | nonsynonymous SNV   | NEURL1:NM_004210:exon4:c.C1120T;p.P374S                                                                                                                                                                                                                                                                                                                                                                                                                                           | . 1.387 . | 0.0001   | 1.47E-05 | 2.79E-05 | Fam99_f_m_aM_aM        | 0/1;0/0;0/0;0/1         |
| chr10 | 105223139 | 105223139 | C | T | SORCS3  | exonic | stopgain            | SORCS3:NM_014978:exon20:c.C2758T;p.R920X                                                                                                                                                                                                                                                                                                                                                                                                                                          | 0.515 .   | 7.35E-05 | 6.19E-05 | 1.40E-05 | Fam16_f_m_aM_aM        | 0/1;0/0;0/0;0/1         |
| chr10 | 115334327 | 115334327 | G | T | ATRN1   | exonic | nonsynonymous SNV   | ATRN1:NM_207303:exon19:c.G3083T;p.C1028F                                                                                                                                                                                                                                                                                                                                                                                                                                          | . 1.049 . |          |          |          | Fam48_f_m_aM_uM        | 0/0;0/1;0/1;0/1         |
| chr10 | 116681194 | 116681194 | G | A | HSPA12A | exonic | nonsynonymous SNV   | HSPA12A:NM_025015:exon9:c.C985T;p.R329W;HSPA12A:NM_001330164:exon10:c.C1036T;p.R346W                                                                                                                                                                                                                                                                                                                                                                                              | . 1.206 . | 0.0007   | 0.0007   | 0.0005   | Fam89_f_m_aM           | 0/0;0/1;0/1             |
| chr10 | 117318960 | 117318960 | C | T | PDZD8   | exonic | nonsynonymous SNV   | PDZD8:NM_173791:exon3:c.G1010A;p.G337E                                                                                                                                                                                                                                                                                                                                                                                                                                            | . 2.059 . |          |          |          | Fam76_f_m_aM_uM        | 0/1;0/0;0/1;0/1         |
| chr10 | 118594362 | 118594362 | G | A | PRLHR   | exonic | nonsynonymous SNV   | PRLHR:NM_004248:exon2:c.C883T;p.H295Y                                                                                                                                                                                                                                                                                                                                                                                                                                             | . 1.231 . |          |          |          | Fam51_f_m_aM_uF        | 0/0;0/1;0/1;0/1         |
| chr10 | 118594899 | 118594899 | G | A | PRLHR   | exonic | nonsynonymous SNV   | PRLHR:NM_004248:exon2:c.C346T;p.L116F                                                                                                                                                                                                                                                                                                                                                                                                                                             | . 1.01 .  |          | 1.14E-05 |          | Fam15_f_m_aM_aM        | 0/0;0/1;0/0;0/1         |
| chr10 | 122429922 | 122429922 | C | T | PLEKHA1 | exonic | nonsynonymous SNV   | PLEKHA1:NM_001001974:exon12:c.C1199T;p.P400L;PLEKHA1:NM_021622:exon12:c.C1199T;p.P400L                                                                                                                                                                                                                                                                                                                                                                                            | . 1.151 . | 0.0007   | 0.0004   | 0.0003   | Fam119_f_m_aM_aM       | 0/0;0/1;0/1;0/0         |
| chr10 | 123150059 | 123150059 | A | G | HMX2    | exonic | nonsynonymous SNV   | HMX2:NM_005519:exon2:c.A758G;p.Y253C<br>CTBP2:NM_001363508:exon5:c.G773A;p.R258H;CTBP2:NM_022802:exon5:c.G2189A;p.R730H;CTBP2:NM_001321013:exon6:c.G569A;p.R190H;CTBP2:NM_001083914:exon7:c.G569A;p.R190H;CTBP2:NM_001290214:exon7:c.G569A;p.R190H;CTBP2:NM_001290215:exon7:c.G569A;p.R190H;CTBP2:NM_001321012:exon7:c.G569A;p.R190H;CTBP2:NM_001321014:exon7:c.G569A;p.R190H;CTBP2:NM_001321013:exon7:c.G569A;p.R190H                                                            | . 1.81 .  |          |          | 6.98E-06 | Fam31_f_m_aM_uF        | 0/1;0/0;0/1;0/1         |
| chr10 | 124994680 | 124994680 | C | T | CTBP2   | exonic | nonsynonymous SNV   | CTBP2:NM_001363508:exon5:c.G773A;p.R258H;CTBP2:NM_022802:exon5:c.G2189A;p.R730H;CTBP2:NM_001321013:exon6:c.G569A;p.R190H;CTBP2:NM_001083914:exon7:c.G569A;p.R190H;CTBP2:NM_001290214:exon7:c.G569A;p.R190H;CTBP2:NM_001290215:exon7:c.G569A;p.R190H;CTBP2:NM_001321012:exon7:c.G569A;p.R190H;CTBP2:NM_001321014:exon7:c.G569A;p.R190H                                                                                                                                             | . 1.445 . | 7.34E-05 | 7.45E-05 | 4.88E-05 | Fam45_f_m_aM_uF        | 0/1;0/0;0/1;0/1         |

|       |           |           |     |   |          |          |                      |                                                                                                                                                                                                                                                                                                                                                                                                                                                                                                                                                                                                                                                                                                           |       |          |          |          |                      |                     |                 |
|-------|-----------|-----------|-----|---|----------|----------|----------------------|-----------------------------------------------------------------------------------------------------------------------------------------------------------------------------------------------------------------------------------------------------------------------------------------------------------------------------------------------------------------------------------------------------------------------------------------------------------------------------------------------------------------------------------------------------------------------------------------------------------------------------------------------------------------------------------------------------------|-------|----------|----------|----------|----------------------|---------------------|-----------------|
| chr10 | 125003083 | 125003083 | C   | A | CTBP2    | exonic   | nonsynonymous SNV    | CTBP2:NM_001363508:exon3:c.G439T;p.A147S,CTBP2:NM_022802:exon3:c.G1855T;p.A619S,CTBP2:NM_001321013:exon4:c.G235T;p.A795,CTBP2:NM_001083914:exon5:c.G235T;p.A795,CTBP2:NM_001290214:exon5:c.G235T;p.A795,CTBP2:NM_001290215:exon5:c.G235T;p.A795,CTBP2:NM_01321012:exon5:c.G235T;p.A795,CTBP2:NM_001321014:exon5:c.G235T;p.A795,CTBP2:NM_001329:exon5:c.G235T;p.A795                                                                                                                                                                                                                                                                                                                                       | 1.882 | 7.34E-05 | 0.0002   | 6.28E-05 | Fam66_f_m_aM         | 0/1;0/0;0/1         |                 |
| chr10 | 127738940 | 127738940 | A   | G | FOXI2    | exonic   | nonsynonymous SNV    | FOXI2:NM_207426:exon2:c.A932G;p.Y311C                                                                                                                                                                                                                                                                                                                                                                                                                                                                                                                                                                                                                                                                     | 1.682 | 7.36E-05 | 5.88E-05 | 2.79E-05 | Fam37_f_m_aF_uM      | 0/1;0/0;0/1;0/0     |                 |
| chr10 | 129841021 | 129841021 | G   | A | EBF3     | exonic   | nonsynonymous SNV    | EBF3:NM_001005463:exon14:c.C1357T;p.R453C                                                                                                                                                                                                                                                                                                                                                                                                                                                                                                                                                                                                                                                                 | 1.88  | .        | 6.82E-05 | 7.28E-06 | Fam88_f_m_aF         | 0/1;0/0;0/1         |                 |
| chr10 | 132200891 | 132200891 | C   | A | DPYSL4   | exonic   | nonsynonymous SNV    | DPYSL4:NM_006426:exon10:c.C1018A;p.Q340K                                                                                                                                                                                                                                                                                                                                                                                                                                                                                                                                                                                                                                                                  | 1.065 | .        | .        | .        | Fam55_f_m_aM_aM_dM   | 0/0;0/1;0/1;0/1;0/1 |                 |
| chr10 | 132226817 | 132226817 | G   | A | STK32C   | exonic   | nonsynonymous SNV    | STK32C:NM_001318878:exon4:c.C661T;p.R221C,STK32C:NM_001318879:exon4:c.C271T;p.R91C,STK32C:NM_173575:exon4:c.C622T;p.R208C                                                                                                                                                                                                                                                                                                                                                                                                                                                                                                                                                                                 | 1.634 | .        | 3.27E-05 | 6.98E-06 | Fam115_f_m_aF_aM_aF  | 0/1;0/0;0/1;0/0;0/0 |                 |
| chr10 | 132405368 | 132405368 | G   | A | PWWP2B   | exonic   | nonsynonymous SNV    | PWWP2B:NM_001098637:exon2:c.G868A;p.G290S,PWWP2B:NM_138499:exon2:c.G868A;p.G290S                                                                                                                                                                                                                                                                                                                                                                                                                                                                                                                                                                                                                          | 1.182 | .        | .        | 7.86E-05 | Fam22_f_m_aF_aF_uF   | 0/0;0/1;0/1;0/1;0/0 |                 |
| chr10 | 132749518 | 132749518 | C   | T | INPP5A   | exonic   | nonsynonymous SNV    | INPP5A:NM_001321042:exon7:c.C542T;p.T181M,INPP5A:NM_005539:exon10:c.C734T;p.T245M                                                                                                                                                                                                                                                                                                                                                                                                                                                                                                                                                                                                                         | 1.581 | 7.34E-05 | 6.54E-05 | 6.98E-06 | Fam72_f_m_aF_uF      | 0/0;0/1;0/1;0/1     |                 |
| chr10 | 133128724 | 133128724 | G   | C | ADGRA1   | exonic   | nonsynonymous SNV    | ADGRA1:NM_001291085:exon4:c.G605C;p.G202A,ADGRA1:NM_001083909:exon7:c.G896C;p.G299A                                                                                                                                                                                                                                                                                                                                                                                                                                                                                                                                                                                                                       | 1.295 | .        | .        | .        | Fam66_f_m_aM         | 0/0;0/1;0/1         |                 |
| chr11 | 244126    | 244126    | -   | G | PSMD13   | exonic   | frameshift insertion | PSMD13:NM_175932:exon2:c.182dupG;p.R62Afs*26                                                                                                                                                                                                                                                                                                                                                                                                                                                                                                                                                                                                                                                              | 0.268 | .        | .        | 2.24E-05 | Fam110_f_m_aM_aM_uMs | 0/1;0/0;0/1;0/1;0/0 |                 |
| chr11 | 460270    | 460270    | C   | T | PTDSS2   | exonic   | nonsynonymous SNV    | PTDSS2:NM_001329544:exon2:c.C266T;p.T89M,PTDSS2:NM_001329548:exon2:c.C86T;p.T29M,PTDSS2:NM_030783:exon2:c.C266T;p.T89M                                                                                                                                                                                                                                                                                                                                                                                                                                                                                                                                                                                    | 1.308 | .        | .        | 3.36E-05 | Fam83_f_m_aF         | 0/1;0/0;0/1         |                 |
| chr11 | 607064    | 607064    | A   | G | PHRF1    | splicing | .                    | .                                                                                                                                                                                                                                                                                                                                                                                                                                                                                                                                                                                                                                                                                                         | 0.574 | .        | .        | 6.81E-05 | 4.88E-05             | Fam78_f_m_aF_uM     | 0/0;0/1;0/1;0/1 |
| chr11 | 792367    | 792367    | C   | T | SLC25A22 | exonic   | nonsynonymous SNV    | SLC25A22:NM_001191060:exon8:c.G679A;p.V227M,SLC25A22:NM_001191061:exon8:c.G679A;p.V227M,SLC25A22:NM_024698:exon8:c.G679A;p.V227M                                                                                                                                                                                                                                                                                                                                                                                                                                                                                                                                                                          | 1.048 | 7.36E-05 | 0.0001   | 0.0002   | Fam47_f_m_aM         | 0/1;0/0;0/1         |                 |
| chr11 | 1442548   | 1442548   | G   | A | BRSK2    | exonic   | nonsynonymous SNV    | BRSK2:NM_001256627:exon5:c.G472A;p.A158T,BRSK2:NM_001256629:exon5:c.G472A;p.A158T,BRSK2:NM_001256630:exon5:c.G610A;p.A204T,BRSK2:NM_001282218:exon5:c.G292A;p.A98T,BRSK2:NM_003957:exon5:c.G472A;p.A158T                                                                                                                                                                                                                                                                                                                                                                                                                                                                                                  | 1.988 | .        | .        | 6.98E-06 | Fam14_f_m_aM_aM      | 0/0;0/0;0/0;0/1     |                 |
| chr11 | 1454559   | 1454560   | AC  | - | BRSK2    | exonic   | frameshift deletion  | BRSK2:NM_001256627:exon16:c.1619_1620del;p.D540Efs*9,BRSK2:NM_001256629:exon16:c.1619_1620del;p.D540Efs*9,BRSK2:NM_001256630:exon16:c.1757_1758del;p.D586Efs*9,BRSK2:NM_001282218:exon16:c.1439_1440del;p.D480Efs*9,BRSK2:NM_003957:exon16:c.1619_1620del;p.D540Efs*9                                                                                                                                                                                                                                                                                                                                                                                                                                     | 0.297 | .        | .        | .        | Fam32_f_m_aM_uM      | 0/0;0/0;0/1;0/0     |                 |
| chr11 | 1459237   | 1459239   | GTG | - | BRSK2    | exonic   | stopgain             | BRSK2:NM_001256627:exon19:c.1985_1987del;p.G663del,BRSK2:NM_001256630:exon19:c.2123_2125del;p.C708_D709delinsY,BRSK2:NM_003957:exon19:c.1985_1987del;p.C662_S668del                                                                                                                                                                                                                                                                                                                                                                                                                                                                                                                                       | 0.297 | .        | .        | 3.27E-05 | Fam5_f_m_aM          | 0/0;0/1;0/1         |                 |
| chr11 | 1563929   | 1563929   | C   | T | DUSP8    | exonic   | nonsynonymous SNV    | DUSP8:NM_004420:exon3:c.G292A;p.V98M                                                                                                                                                                                                                                                                                                                                                                                                                                                                                                                                                                                                                                                                      | 2.011 | .        | .        | 6.98E-06 | Fam15_f_m_aM_aM      | 0/1;0/0;0/1;0/0     |                 |
| chr11 | 1565654   | 1565654   | C   | T | DUSP8    | exonic   | nonsynonymous SNV    | DUSP8:NM_004420:exon2:c.G173A;p.R58Q                                                                                                                                                                                                                                                                                                                                                                                                                                                                                                                                                                                                                                                                      | 2.267 | .        | 0.0003   | 0.0001   | 4.19E-05             | Fam102_f_m_aM       | 0/0;0/1;0/1     |
| chr11 | 1932480   | 1932480   | C   | T | TNNT3    | exonic   | nonsynonymous SNV    | TNNT3:NM_001367850:exon6:c.C80T;p.P27L,TNNT3:NM_01367844:exon7:c.C113T;p.P38L,TNNT3:NM_001367849:exon7:c.C125T;p.P42L,TNNT3:NM_001042780:exon8:c.C113T;p.P38L,TNNT3:NM_001042782:exon8:c.C113T;p.P38L,TNNT3:NM_001367842:exon8:c.C131T;p.P44L,TNNT3:NM_001367843:exon8:c.C131T;p.P44L,TNNT3:NM_001367845:exon8:c.C113T;p.P38L,TNNT3:NM_001042781:exon9:c.C131T;p.P44L,TNNT3:NM_001297646:exon9:c.C113T;p.P38L,TNNT3:NM_001367847:exon9:c.C146T;p.P49L,TNNT3:NM_001367848:exon9:c.C134T;p.P45L,TNNT3:NM_006757:exon9:c.C137T;p.P46L,TNNT3:NM_001363561:exon10:c.C146T;p.P49L,TNNT3:NM_001367846:exon11:c.C170T;p.P57L                                                                                      | 1.086 | .        | .        | .        | Fam97_f_m_aM_aF      | 0/0;0/1;0/1;0/0     |                 |
| chr11 | 2270184   | 2270184   | G   | C | ASCL2    | exonic   | nonsynonymous SNV    | ASCL2:NM_005170:exon1:c.C149G;p.A50G,PGAP2:NM_001256239:exon3:c.G233A;p.R78H,PGAP2:NM_001256240:exon3:c.G233A;p.R78H,PGAP2:NM_001145438:exon4:c.G404A;p.R135H,PGAP2:NM_001256237:exon4:c.G404A;p.R135H,PGAP2:NM_001256238:exon4:c.G233A;p.R78H,PGAP2:NM_001283038:exon4:c.G404A;p.R135H,PGAP2:NM_001346397:exon4:c.G386A;p.R129H,PGAP2:NM_001346398:exon4:c.G233A;p.R78H,PGAP2:NM_001346400:exon4:c.G233A;p.R78H,PGAP2:NM_001346404:exon4:c.G233A;p.R78H,PGAP2:NM_001346405:exon4:c.G233A;p.R78H,PGAP2:NM_014489:exon4:c.G416A;p.R139H,PGAP2:NM_001256235:exon5:c.G287A;p.R96H,PGAP2:NM_001256236:exon5:c.G587A;p.R196H,PGAP2:NM_001346402:exon5:c.G353A;p.R118H,PGAP2:NM_001346403:exon5:c.G416A;p.R1304 | 2.237 | .        | 7.63E-05 | 2.80E-05 | Fam38_f_m_aM         | 0/0;0/1;0/1         |                 |
| chr11 | 3823950   | 3823950   | G   | A | PGAP2    | exonic   | nonsynonymous SNV    | PGAP2:NM_001256239:exon3:c.G233A;p.R78H,PGAP2:NM_001256240:exon3:c.G233A;p.R78H,PGAP2:NM_001145438:exon4:c.G404A;p.R135H,PGAP2:NM_001256237:exon4:c.G404A;p.R135H,PGAP2:NM_001256238:exon4:c.G233A;p.R78H,PGAP2:NM_001283038:exon4:c.G404A;p.R135H,PGAP2:NM_001346397:exon4:c.G386A;p.R129H,PGAP2:NM_001346398:exon4:c.G233A;p.R78H,PGAP2:NM_001346400:exon4:c.G233A;p.R78H,PGAP2:NM_001346404:exon4:c.G233A;p.R78H,PGAP2:NM_001346405:exon4:c.G233A;p.R78H,PGAP2:NM_014489:exon4:c.G416A;p.R139H,PGAP2:NM_001256235:exon5:c.G287A;p.R96H,PGAP2:NM_001256236:exon5:c.G587A;p.R196H,PGAP2:NM_001346402:exon5:c.G353A;p.R118H,PGAP2:NM_001346403:exon5:c.G416A;p.R1304                                      | 1.287 | .        | 6.55E-05 | 1.40E-05 | Fam78_f_m_aF_uM      | 0/0;0/1;0/1;0/1     |                 |
| chr11 | 4091584   | 4091584   | G   | A | STIM1    | exonic   | nonsynonymous SNV    | STIM1:NM_001277961:exon12:c.G2162A;p.R721H,STIM1:NM_003156:exon12:c.G1844A;p.R615H                                                                                                                                                                                                                                                                                                                                                                                                                                                                                                                                                                                                                        | 1.415 | .        | 0.0006   | 0.0002   | 5.58E-05             | Fam37_f_m_aF_uM     | 0/1;0/0;0/1;0/0 |
| chr11 | 6217802   | 6217802   | C   | T | FAM160A2 | exonic   | nonsynonymous SNV    | FAM160A2:NM_001098794:exon9:c.G1784A;p.R595H,FAM160A2:NM_032127:exon9:c.G1826A;p.R609H                                                                                                                                                                                                                                                                                                                                                                                                                                                                                                                                                                                                                    | 1.198 | .        | .        | 7.47E-05 | 7.01E-06             | Fam117_f_m_aM_aF    | 0/1;0/0;0/1;0/1 |
| chr11 | 6269797   | 6269797   | C   | T | CCKBR    | exonic   | nonsynonymous SNV    | CCKBR:NM_001363552:exon2:c.C280T;p.L94F,CCKBR:NM_176875:exon2:c.C280T;p.L94F                                                                                                                                                                                                                                                                                                                                                                                                                                                                                                                                                                                                                              | 1.033 | .        | .        | 2.23E-05 | Fam68_f_m_aF_uF_uM   | 0/0;0/1;0/1;0/1;0/1 |                 |

|       |          |          |   |   |         |        |                   |                                                                                                                                                                                                                                                                                                                                                                                                                                                                                                                                                                                                                        |       |          |          |                        |                         |                         |
|-------|----------|----------|---|---|---------|--------|-------------------|------------------------------------------------------------------------------------------------------------------------------------------------------------------------------------------------------------------------------------------------------------------------------------------------------------------------------------------------------------------------------------------------------------------------------------------------------------------------------------------------------------------------------------------------------------------------------------------------------------------------|-------|----------|----------|------------------------|-------------------------|-------------------------|
| chr11 | 6402113  | 6402113  | G | A | APBB1   | exonic | nonsynonymous SNV | APBB1:NM_001257319:exon7:c.C691T:p.R231C,APBB1:NM_001257320:exon7:c.C574T:p.R192C,APBB1:NM_001257323:exon7:c.C691T:p.R231C,APBB1:NM_001257325:exon7:c.C646T:p.R216C,APBB1:NM_001257326:exon7:c.C574T:p.R192C,APBB1:NM_001164:exon8:c.C1351T:p.R451C,APBB1:NM_001257321:exon8:c.C574T:p.R192C,APBB1:NM_145689:exon8:c.C1351T:p.R451C,TRIM3:NM_001248007:exon5:c.G944A:p.R315H,TRIM3:NM_001248006:exon6:c.G1301A:p.R434H,TRIM3:NM_033278:exon6:c.G1301A:p.R434H,TRIM3:NM_006458:exon7:c.G1301A:p.R434H,TRIM3:NM_001248006:exon3:c.C167T:p.T56M,TRIM3:NM_033278:exon3:c.C167T:p.T56M,TRIM3:NM_006458:exon4:c.C167T:p.T56M | 1.225 | 0.0002   | 6.98E-05 | Fam98_f_m_aM           | 0/1;0/0;0/1             |                         |
| chr11 | 6456425  | 6456425  | C | T | TRIM3   | exonic | nonsynonymous SNV | M_001248006:exon6:c.G1301A:p.R434H,TRIM3:NM_033278:exon6:c.G1301A:p.R434H,TRIM3:NM_006458:exon7:c.G1301A:p.R434H,TRIM3:NM_001248006:exon3:c.C167T:p.T56M,TRIM3:NM_033278:exon3:c.C167T:p.T56M,TRIM3:NM_006458:exon4:c.C167T:p.T56M                                                                                                                                                                                                                                                                                                                                                                                     | 2.443 |          | 4.46E-05 | 2.79E-05               | Fam92_f_m_aM_raM        | 0/1;0/0;0/1;0/0         |
| chr11 | 6458261  | 6458261  | G | A | TRIM3   | exonic | nonsynonymous SNV | M_001248006:exon6:c.G1301A:p.R434H,TRIM3:NM_033278:exon6:c.G1301A:p.R434H,TRIM3:NM_006458:exon7:c.G1301A:p.R434H,TRIM3:NM_001248006:exon3:c.C167T:p.T56M,TRIM3:NM_033278:exon3:c.C167T:p.T56M,TRIM3:NM_006458:exon4:c.C167T:p.T56M                                                                                                                                                                                                                                                                                                                                                                                     | 2.221 |          |          | 6.98E-06               | Fam66_f_m_aM            | 0/0;0/1;0/1             |
| chr11 | 6630176  | 6630176  | T | C | DCHS1   | exonic | nonsynonymous SNV | DCHS1:NM_003737:exon10:c.A4618G:p.N1540D                                                                                                                                                                                                                                                                                                                                                                                                                                                                                                                                                                               | 2.825 |          |          | Fam88_f_m_aF           | 0/1;0/0;0/1             |                         |
| chr11 | 6632580  | 6632580  | G | A | DCHS1   | exonic | nonsynonymous SNV | DCHS1:NM_003737:exon6:c.C2932T:p.R978C                                                                                                                                                                                                                                                                                                                                                                                                                                                                                                                                                                                 | 1.095 | 0.0003   | 0.0005   | 0.0002                 | Fam26_f_m_aM_uM         | 0/0;0/1;0/1;0/1         |
| chr11 | 6640838  | 6640838  | C | T | DCHS1   | exonic | nonsynonymous SNV | DCHS1:NM_003737:exon2:c.G776A:p.R259H,AMPD3:NM_001172431:exon12:c.A1379C:p.Q460P,AMPD3:NM_000480:exon13:c.A1883C:p.Q628P,AMPD3:NM_001025390:exon13:c.A1877C:p.Q626P,AMPD3:NM_001172430:exon13:c.A1856C:p.Q619P,CTFR9:NM_001346279:exon19:c.G2417A:p.R806Q,CTFR9:NM_014633:exon20:c.G2489A:p.R830Q,GALNT18:NM_001363464:exon7:c.G1132A:p.A378T,GALNT18:NM_198516:exon8:c.G1318A:p.A440T                                                                                                                                                                                                                                 | 1.102 |          | 7.46E-05 | 6.98E-06               | Fam89_f_m_aM            | 0/0;0/1;0/1             |
| chr11 | 10502734 | 10502734 | A | C | AMPD3   | exonic | nonsynonymous SNV | DCHS1:NM_003737:exon2:c.G776A:p.R259H,AMPD3:NM_001172431:exon12:c.A1379C:p.Q460P,AMPD3:NM_000480:exon13:c.A1883C:p.Q628P,AMPD3:NM_001025390:exon13:c.A1877C:p.Q626P,AMPD3:NM_001172430:exon13:c.A1856C:p.Q619P,CTFR9:NM_001346279:exon19:c.G2417A:p.R806Q,CTFR9:NM_014633:exon20:c.G2489A:p.R830Q,GALNT18:NM_001363464:exon7:c.G1132A:p.A378T,GALNT18:NM_198516:exon8:c.G1318A:p.A440T                                                                                                                                                                                                                                 | 1.038 |          | 1.12E-05 | 1.40E-05               | Fam35_f_m_aF_uM         | 0/1;0/0;0/1;0/0         |
| chr11 | 10772564 | 10772564 | G | A | CTR9    | exonic | nonsynonymous SNV | CTFR9:NM_001346279:exon19:c.G2417A:p.R806Q,CTFR9:NM_014633:exon20:c.G2489A:p.R830Q,GALNT18:NM_001363464:exon7:c.G1132A:p.A378T,GALNT18:NM_198516:exon8:c.G1318A:p.A440T                                                                                                                                                                                                                                                                                                                                                                                                                                                | 2.284 |          |          | Fam77_f_m_aM_aF_uM_uFs | 0/1;0/0;0/1;0/0;0/1;0/0 |                         |
| chr11 | 11332792 | 11332792 | C | T | GALNT18 | exonic | nonsynonymous SNV | CTFR9:NM_001346279:exon19:c.G2417A:p.R806Q,CTFR9:NM_014633:exon20:c.G2489A:p.R830Q,GALNT18:NM_001363464:exon7:c.G1132A:p.A378T,GALNT18:NM_198516:exon8:c.G1318A:p.A440T                                                                                                                                                                                                                                                                                                                                                                                                                                                | 1.047 |          | 4.47E-05 | 3.49E-05               | Fam12_f_m_aM_uM_aM      | 0/0;0/1;0/1;0/1;0/1     |
| chr11 | 12008428 | 12008428 | C | A | DKK3    | exonic | nonsynonymous SNV | DKK3:NM_001018057:exon1:c.G155T:p.R52L,DKK3:NM_01330220:exon2:c.G155T:p.R52L,DKK3:NM_013253:exon2:c.G155T:p.R52L,DKK3:NM_015881:exon2:c.G155T:p.R52L                                                                                                                                                                                                                                                                                                                                                                                                                                                                   | 1.192 |          |          | 6.98E-06               | Fam69_f_m_aM            | 0/1;0/0;0/1             |
| chr11 | 12162246 | 12162246 | G | A | MICAL2  | exonic | nonsynonymous SNV | MICAL2:NM_001282666:exon1:c.G91A:p.A31T,MICAL2:NM_001282667:exon1:c.G91A:p.A31T,MICAL2:NM_001282664:exon2:c.G91A:p.A31T,MICAL2:NM_001282665:exon2:c.G91A:p.A31T,MICAL2:NM_001346292:exon2:c.G91A:p.A31T,MICAL2:NM_001346294:exon2:c.G91A:p.A31T,MICAL2:NM_001346298:exon2:c.G91A:p.A31T,MICAL2:NM_001282663:exon3:c.G91A:p.A31T,MICAL2:NM_001282668:exon3:c.G91A:p.A31T,MICAL2:NM_001346293:exon3:c.G91A:p.A31T,MICAL2:NM_001346295:exon3:c.G91A:p.A31T,MICAL2:NM_001346296:exon3:c.G91A:p.A31T,MICAL2:NM_001346297:exon3:c.G91A:p.A31T,MICAL2:NM_001346299:exon3:c.G91A:p.A31T,MICAL2:NM_014632:exon3:c.G91A:p.A31T   | 1.386 | 0.0004   | 0.0006   | 0.0006                 | Fam77_f_m_aM_aF_uM_uFs  | 0/0;0/1;0/1;0/0;0/0;0/1 |
| chr11 | 12162246 | 12162246 | G | A | MICAL2  | exonic | nonsynonymous SNV | MICAL2:NM_001282666:exon1:c.G91A:p.A31T,MICAL2:NM_001282667:exon1:c.G91A:p.A31T,MICAL2:NM_001282664:exon2:c.G91A:p.A31T,MICAL2:NM_001282665:exon2:c.G91A:p.A31T,MICAL2:NM_001346292:exon2:c.G91A:p.A31T,MICAL2:NM_001346294:exon2:c.G91A:p.A31T,MICAL2:NM_001346298:exon2:c.G91A:p.A31T,MICAL2:NM_001282663:exon3:c.G91A:p.A31T,MICAL2:NM_001282668:exon3:c.G91A:p.A31T,MICAL2:NM_001346293:exon3:c.G91A:p.A31T,MICAL2:NM_001346295:exon3:c.G91A:p.A31T,MICAL2:NM_001346296:exon3:c.G91A:p.A31T,MICAL2:NM_001346297:exon3:c.G91A:p.A31T,MICAL2:NM_001346299:exon3:c.G91A:p.A31T,MICAL2:NM_014632:exon3:c.G91A:p.A31T   | 1.386 | 0.0004   | 0.0006   | 0.0006                 | Fam40_f_m_aM_aM         | 0/1;0/0;0/1;0/1         |
| chr11 | 14294515 | 14294515 | T | C | RRAS2   | exonic | nonsynonymous SNV | RRAS2:NM_001102669:exon4:c.A133G:p.M45V,RRAS2:NM_001177314:exon4:c.A259G:p.M87V,RRAS2:NM_001177315:exon4:c.A133G:p.M45V,RRAS2:NM_012250:exon4:c.A364G:p.M122V                                                                                                                                                                                                                                                                                                                                                                                                                                                          | 1.041 |          | 1.15E-05 | Fam66_f_m_aM           | 0/0;0/1;0/1             |                         |
| chr11 | 17719844 | 17719844 | G | C | MYOD1   | exonic | nonsynonymous SNV | MYOD1:NM_002478:exon1:c.G62C:p.C215,PTPN5:NM_001278238:exon11:c.C1234T:p.R412W,PTPN5:NM_001278239:exon11:c.C1138T:p.R380W,PTPN5:NM_001039970:exon12:c.C1210T:p.R404W,PTPN5:NM_001278236:exon12:c.C1210T:p.R404W,PTPN5:NM_006906:exon12:c.C1306T:p.R436W,PTPN5:NM_032781:exon12:c.C1306T:p.R436W                                                                                                                                                                                                                                                                                                                        | 1.49  | 0.0002   | 0.0003   | 0.0001                 | Fam118_f_m_aM_aF_uM     | 0/0;0/1;0/0;0/1;0/0     |
| chr11 | 18732615 | 18732615 | G | A | PTPN5   | exonic | nonsynonymous SNV | MYOD1:NM_002478:exon1:c.G62C:p.C215,PTPN5:NM_001278238:exon11:c.C1234T:p.R412W,PTPN5:NM_001278239:exon11:c.C1138T:p.R380W,PTPN5:NM_001039970:exon12:c.C1210T:p.R404W,PTPN5:NM_001278236:exon12:c.C1210T:p.R404W,PTPN5:NM_006906:exon12:c.C1306T:p.R436W,PTPN5:NM_032781:exon12:c.C1306T:p.R436W                                                                                                                                                                                                                                                                                                                        | 1.018 | 7.34E-05 | 0.0001   | 3.49E-05               | Fam42_f_m_aM_uF         | 0/0;0/1;0/1;0/1         |
| chr11 | 19224693 | 19224693 | G | A | E2F8    | exonic | stopgain          | E2F8:NM_001256371:exon13:c.C2569T:p.R857X,E2F8:NM_001256372:exon13:c.C2569T:p.R857X,E2F8:NM_024680:exon13:c.C2569T:p.R857X,NAV2:NM_001110119:exon16:c.C2570T:p.A857V,NAV2:NM_001110118:exon26:c.C5186T:p.A1729V,NAV2:NM_145117:exon26:c.C5378T:p.A1793V,NAV2:NM_182964:exon26:c.C5387T:p.A1796V,NAV2:NM_001244963:exon28:c.C555T:p.A1852V,NAV2:NM_001110119:exon22:c.C3451A:p.L1151I,NAV2:NM_001110118:exon32:c.C6067A:p.L2023I,NAV2:NM_145117:exon32:c.C6259A:p.L2087I,NAV2:NM_182964:exon32:c.C6268A:p.L2090I,NAV2:NM_001244963:exon34:c.C6436A:p.L2146I                                                             | 0.539 |          | 0.0002   | 9.77E-05               | Fam118_f_m_aM_aF_uM     | 0/0;0/1;0/0;0/1;0/0     |
| chr11 | 20083059 | 20083059 | C | T | NAV2    | exonic | nonsynonymous SNV | E2F8:NM_001256371:exon13:c.C2569T:p.R857X,E2F8:NM_001256372:exon13:c.C2569T:p.R857X,E2F8:NM_024680:exon13:c.C2569T:p.R857X,NAV2:NM_001110119:exon16:c.C2570T:p.A857V,NAV2:NM_001110118:exon26:c.C5186T:p.A1729V,NAV2:NM_145117:exon26:c.C5378T:p.A1793V,NAV2:NM_182964:exon26:c.C5387T:p.A1796V,NAV2:NM_001244963:exon28:c.C555T:p.A1852V,NAV2:NM_001110119:exon22:c.C3451A:p.L1151I,NAV2:NM_001110118:exon32:c.C6067A:p.L2023I,NAV2:NM_145117:exon32:c.C6259A:p.L2087I,NAV2:NM_182964:exon32:c.C6268A:p.L2090I,NAV2:NM_001244963:exon34:c.C6436A:p.L2146I                                                             | 1.244 |          | 3.35E-05 | 6.98E-06               | Fam26_f_m_aM_uM         | 0/1;0/0;0/1;0/1         |
| chr11 | 20101014 | 20101014 | C | A | NAV2    | exonic | nonsynonymous SNV | E2F8:NM_001256371:exon13:c.C2569T:p.R857X,E2F8:NM_001256372:exon13:c.C2569T:p.R857X,E2F8:NM_024680:exon13:c.C2569T:p.R857X,NAV2:NM_001110119:exon16:c.C2570T:p.A857V,NAV2:NM_001110118:exon26:c.C5186T:p.A1729V,NAV2:NM_145117:exon26:c.C5378T:p.A1793V,NAV2:NM_182964:exon26:c.C5387T:p.A1796V,NAV2:NM_001244963:exon28:c.C555T:p.A1852V,NAV2:NM_001110119:exon22:c.C3451A:p.L1151I,NAV2:NM_001110118:exon32:c.C6067A:p.L2023I,NAV2:NM_145117:exon32:c.C6259A:p.L2087I,NAV2:NM_182964:exon32:c.C6268A:p.L2090I,NAV2:NM_001244963:exon34:c.C6436A:p.L2146I                                                             | 1.286 |          |          | Fam26_f_m_aM_uM        | 0/1;0/0;0/1;0/1         |                         |



|       |          |          |   |      |         |          |                      |                                                                                                                                                                                                                                                                                                                                                                                                                                                                                                                                                                                                                                                                                                                                                                                                                                                                                                                                                                                                                                                                                                                                                                                                                                                                   |       |          |          |          |                    |                     |
|-------|----------|----------|---|------|---------|----------|----------------------|-------------------------------------------------------------------------------------------------------------------------------------------------------------------------------------------------------------------------------------------------------------------------------------------------------------------------------------------------------------------------------------------------------------------------------------------------------------------------------------------------------------------------------------------------------------------------------------------------------------------------------------------------------------------------------------------------------------------------------------------------------------------------------------------------------------------------------------------------------------------------------------------------------------------------------------------------------------------------------------------------------------------------------------------------------------------------------------------------------------------------------------------------------------------------------------------------------------------------------------------------------------------|-------|----------|----------|----------|--------------------|---------------------|
| chr11 | 31806404 | 31806404 | T | C    | PAX6    | exonic   | nonsynonymous SNV    | PAX6:NM_001310159:exon2:c.A8G:p.N35,PAX6:NM_001258463:exon4:c.A8G:p.N35,PAX6:NM_001258464:exon4:c.A8G:p.N35,PAX6:NM_001368891:exon3:c.A8G:p.N35,PAX6:NM_001368892:exon3:c.A8G:p.N35,PAX6:NM_001368913:exon3:c.A8G:p.N35,PAX6:NM_001368916:exon3:c.A8G:p.N35,PAX6:NM_001368918:exon3:c.A8G:p.N35,PAX6:NM_001368920:exon3:c.A8G:p.N35,PAX6:NM_001368924:exon3:c.A8G:p.N35,PAX6:NM_001368925:exon3:c.A8G:p.N35,PAX6:NM_001368928:exon3:c.A8G:p.N35,PAX6:NM_000280:exon4:c.A8G:p.N35,PAX6:NM_001127612:exon4:c.A8G:p.N35,PAX6:NM_001258462:exon4:c.A8G:p.N35,PAX6:NM_001258463:exon4:c.A8G:p.N35,PAX6:NM_001258464:exon4:c.A8G:p.N35,PAX6:NM_001310158:exon4:c.A8G:p.N35,PAX6:NM_001368887:exon4:c.A8G:p.N35,PAX6:NM_001368888:exon4:c.A8G:p.N35,PAX6:NM_001368890:exon4:c.A8G:p.N35,PAX6:NM_001368894:exon4:c.A8G:p.N35,PAX6:NM_001368912:exon4:c.A8G:p.N35,PAX6:NM_001368914:exon4:c.A8G:p.N35,PAX6:NM_001368915:exon4:c.A8G:p.N35,PAX6:NM_001368917:exon4:c.A8G:p.N35,PAX6:NM_001368919:exon4:c.A8G:p.N35,PAX6:NM_001368921:exon4:c.A8G:p.N35,PAX6:NM_001368922:exon4:c.A8G:p.N35,PAX6:NM_001368923:exon4:c.A8G:p.N35,PAX6:NM_001368926:exon4:c.A8G:p.N35,PAX6:NM_001368927:exon4:c.A8G:p.N35,PAX6:NM_001604:exon4:c.A8G:p.N35,PAX6:NM_001368893:exon5:c.A8G:p.N35 | 1.501 |          |          |          | Fam122_f_m_aM      | 0/1;0/0;0/1         |
| chr11 | 33141645 | 33141645 | - | AAAA | CSTF3   | exonic   | frameshift insertion | CSTF3:NM_001033505:exon3:c.246_247insATTTT;p.F83ifs*21                                                                                                                                                                                                                                                                                                                                                                                                                                                                                                                                                                                                                                                                                                                                                                                                                                                                                                                                                                                                                                                                                                                                                                                                            | 0.377 | 0.0002   | 0.0003   | 0.0003   | Fam49_f_m_aM       | 0/0;0/1;0/1         |
| chr11 | 33751545 | 33751545 | T | G    | FBXO3   | exonic   | nonsynonymous SNV    | FBXO3:NM_012175:exon7:c.A787C:p.I263L,FBXO3:NM_033406:exon7:c.A787C:p.I263L                                                                                                                                                                                                                                                                                                                                                                                                                                                                                                                                                                                                                                                                                                                                                                                                                                                                                                                                                                                                                                                                                                                                                                                       | 1.526 |          | 0.0001   |          | Fam27_f_m_aF_uM_uM | 0/0;0/1;0/1;0/0;0/0 |
| chr11 | 33751545 | 33751545 | T | G    | FBXO3   | exonic   | nonsynonymous SNV    | FBXO3:NM_012175:exon7:c.A787C:p.I263L,FBXO3:NM_033406:exon7:c.A787C:p.I263L                                                                                                                                                                                                                                                                                                                                                                                                                                                                                                                                                                                                                                                                                                                                                                                                                                                                                                                                                                                                                                                                                                                                                                                       | 1.526 |          | 0.0001   |          | Fam59_f_m_aF_uM    | 0/1;0/0;0/1;0/1     |
| chr11 | 34883386 | 34883386 | G | A    | APIP    | exonic   | nonsynonymous SNV    | APIP:NM_015957:exon6:c.C580T;p.R194C                                                                                                                                                                                                                                                                                                                                                                                                                                                                                                                                                                                                                                                                                                                                                                                                                                                                                                                                                                                                                                                                                                                                                                                                                              | 1.244 |          | 2.24E-05 | 2.10E-05 | Fam102_f_m_aM      | 0/0;0/1;0/1         |
| chr11 | 36462525 | 36462525 | T | A    | PRR5L   | exonic   | nonsynonymous SNV    | PRR5L:NM_001160168:exon6:c.T512A;p.I171N,PRR5L:NM_001160167:exon9:c.T896A;p.I299N,PRR5L:NM_024841:exon10:c.T896A;p.I299N                                                                                                                                                                                                                                                                                                                                                                                                                                                                                                                                                                                                                                                                                                                                                                                                                                                                                                                                                                                                                                                                                                                                          | 1.283 |          | 1.18E-05 |          | Fam72_f_m_aF_uF    | 0/1;0/0;0/1;0/0     |
| chr11 | 40115766 | 40115766 | C | G    | LRR4C4  | exonic   | nonsynonymous SNV    | LRR4C4:NM_020929:exon5:c.G527C;p.R176P,LRR4C4:NM_001258419:exon7:c.G527C;p.R176P                                                                                                                                                                                                                                                                                                                                                                                                                                                                                                                                                                                                                                                                                                                                                                                                                                                                                                                                                                                                                                                                                                                                                                                  | 1.732 |          |          |          | Fam103_f_m_aM      | 0/0;0/1;0/1         |
| chr11 | 40319722 | 40319722 | C | T    | LRR4C4  | splicing | .                    | .                                                                                                                                                                                                                                                                                                                                                                                                                                                                                                                                                                                                                                                                                                                                                                                                                                                                                                                                                                                                                                                                                                                                                                                                                                                                 | 0.297 |          |          | 1.40E-05 | Fam7_f_m_aM_aM_uM  | 0/1;0/0;0/1;0/1;0/0 |
| chr11 | 45650489 | 45650489 | G | T    | CHST1   | exonic   | nonsynonymous SNV    | CHST1:NM_003654:exon4:c.C435A;p.N145K                                                                                                                                                                                                                                                                                                                                                                                                                                                                                                                                                                                                                                                                                                                                                                                                                                                                                                                                                                                                                                                                                                                                                                                                                             | 1.89  |          |          |          | Fam92_f_m_aM_raM   | 0/0;0/0;0/0;0/1     |
| chr11 | 45650659 | 45650659 | G | T    | CHST1   | exonic   | nonsynonymous SNV    | CHST1:NM_003654:exon4:c.C265A;p.L89M                                                                                                                                                                                                                                                                                                                                                                                                                                                                                                                                                                                                                                                                                                                                                                                                                                                                                                                                                                                                                                                                                                                                                                                                                              | 2.095 |          | 2.23E-05 |          | Fam29_f_m_aF_uM    | 0/1;0/0;0/1;0/0     |
| chr11 | 46542621 | 46542621 | C | T    | AMBRA1  | exonic   | nonsynonymous SNV    | AMBRA1:NM_001300731:exon7:c.G1396A;p.A466T,AMBRA1:NM_001367468:exon7:c.G1396A;p.A466T,AMBRA1:NM_001267782:exon8:c.G1126A;p.A376T,AMBRA1:NM_001267783:exon8:c.G1126A;p.A376T,AMBRA1:NM_001367469:exon8:c.G1126A;p.A376T,AMBRA1:NM_001367470:exon8:c.G589A;p.A197T,AMBRA1:NM_001367471:exon8:c.G1126A;p.A376T,AMBRA1:NM_017749:exon8:c.G1126A;p.A376T                                                                                                                                                                                                                                                                                                                                                                                                                                                                                                                                                                                                                                                                                                                                                                                                                                                                                                               | 1.418 |          |          |          | Fam27_f_m_aF_uM_uM | 0/0;0/1;0/1;0/0;0/1 |
| chr11 | 46739293 | 46739293 | T | C    | F2      | exonic   | nonsynonymous SNV    | F2:NM_000506:exon14:c.T1754C;p.M585T,F2:NM_001311257:exon14:c.T1706C;p.M569T                                                                                                                                                                                                                                                                                                                                                                                                                                                                                                                                                                                                                                                                                                                                                                                                                                                                                                                                                                                                                                                                                                                                                                                      | 1.483 | 0.0006   | 0.0001   | 6.28E-05 | Fam95_f_m_aM_aM_uF | 0/1;0/0;0/1;0/1;0/1 |
| chr11 | 46899461 | 46899461 | C | A    | LRP4    | exonic   | nonsynonymous SNV    | LRP4:NM_002334:exon5:c.G473T;p.G158V                                                                                                                                                                                                                                                                                                                                                                                                                                                                                                                                                                                                                                                                                                                                                                                                                                                                                                                                                                                                                                                                                                                                                                                                                              | 1.677 |          |          |          | Fam61_f_m_aM       | 0/0;0/1;0/1         |
| chr11 | 47175289 | 47175289 | A | G    | ARFGAP2 | exonic   | nonsynonymous SNV    | ARFGAP2:NM_001242832:exon4:c.T289C;p.C97R,ARFGAP2:NM_032389:exon4:c.T289C;p.C97R,NR1H3:NM_001363595:exon6:c.A694C;p.N232H,NR1H3:NM_001130101:exon7:c.A829C;p.N277H,NR1H3:NM_001130102:exon7:c.A874C;p.N292H,NR1H3:NM_001251934:exon8:c.A1027C;p.N343H,NR1H3:NM_001251935:exon8:c.A1027C;p.N343H,NR1H3:NM_005693:exon8:c.A1009C;p.N337H                                                                                                                                                                                                                                                                                                                                                                                                                                                                                                                                                                                                                                                                                                                                                                                                                                                                                                                            | 1.053 | 0.0002   | 6.70E-05 | 4.19E-05 | Fam87_f_m_aM_uM    | 0/0;0/1;0/1;0/0     |
| chr11 | 47267933 | 47267933 | A | C    | NR1H3   | exonic   | nonsynonymous SNV    | MADD:NM_001135943:exon5:c.G1012A;p.A338T,MADD:NM_001135944:exon5:c.G1012A;p.A338T,MADD:NM_003682:exon5:c.G1012A;p.A338T,MADD:NM_130470:exon5:c.G1012A;p.A338T,MADD:NM_130471:exon5:c.G1012A;p.A338T,MADD:NM_130472:exon5:c.G1012A;p.A338T,MADD:NM_130473:exon5:c.G1012A;p.A338T,MADD:NM_130474:exon5:c.G1012A;p.A338T,MADD:NM_130475:exon5:c.G1012A;p.A338T,MADD:NM_130476:exon5:c.G1012A;p.A338T                                                                                                                                                                                                                                                                                                                                                                                                                                                                                                                                                                                                                                                                                                                                                                                                                                                                 | 1.343 | 7.34E-05 | 0.0001   | 0.0002   | Fam61_f_m_aM       | 0/1;0/0;0/1         |
| chr11 | 47276780 | 47276780 | G | A    | MADD    | exonic   | nonsynonymous SNV    | MADD:NM_001135943:exon5:c.G1012A;p.A338T,MADD:NM_001135944:exon5:c.G1012A;p.A338T,MADD:NM_003682:exon5:c.G1012A;p.A338T,MADD:NM_130470:exon5:c.G1012A;p.A338T,MADD:NM_130471:exon5:c.G1012A;p.A338T,MADD:NM_130472:exon5:c.G1012A;p.A338T,MADD:NM_130473:exon5:c.G1012A;p.A338T,MADD:NM_130474:exon5:c.G1012A;p.A338T,MADD:NM_130475:exon5:c.G1012A;p.A338T,MADD:NM_130476:exon5:c.G1012A;p.A338T                                                                                                                                                                                                                                                                                                                                                                                                                                                                                                                                                                                                                                                                                                                                                                                                                                                                 | 1.1   |          |          |          | Fam121_f_m_aF_aM   | 0/0;0/1;0/1;0/1     |
| chr11 | 47419145 | 47419145 | C | T    | PSMC3   | exonic   | nonsynonymous SNV    | PSMC3:NM_002804:exon11:c.G1180A;p.A394T                                                                                                                                                                                                                                                                                                                                                                                                                                                                                                                                                                                                                                                                                                                                                                                                                                                                                                                                                                                                                                                                                                                                                                                                                           | 2.082 |          |          |          | Fam106_f_m_aM      | 0/0;0/0;0/1         |
| chr11 | 47499490 | 47499490 | T | C    | CELF1   | exonic   | nonsynonymous SNV    | CELF1:NM_001172639:exon3:c.A34G;p.M12V,CELF1:NM_01330272:exon3:c.A34G;p.M12V                                                                                                                                                                                                                                                                                                                                                                                                                                                                                                                                                                                                                                                                                                                                                                                                                                                                                                                                                                                                                                                                                                                                                                                      | 1.027 |          | 4.64E-05 | 1.40E-05 | Fam33_f_m_aM_uM    | 0/0;0/1;0/1;0/1     |
| chr11 | 47808452 | 47808456 | - | ATAA | NUP160  | exonic   | frameshift deletion  | NUP160:NM_015231:exon18:c.2315_2319del;p.S772fs                                                                                                                                                                                                                                                                                                                                                                                                                                                                                                                                                                                                                                                                                                                                                                                                                                                                                                                                                                                                                                                                                                                                                                                                                   | 0.596 |          | 1.12E-05 | 1.40E-05 | Fam86_f_m_aF       | 0/1;0/0;0/1         |
| chr11 | 57659981 | 57659981 | G | A    | CLP1    | exonic   | nonsynonymous SNV    | CLP1:NM_006831:exon2:c.G505A;p.E169K                                                                                                                                                                                                                                                                                                                                                                                                                                                                                                                                                                                                                                                                                                                                                                                                                                                                                                                                                                                                                                                                                                                                                                                                                              | 1.206 |          |          |          | Fam25_f_m_aM       | 0/1;0/0;0/1         |
| chr11 | 57661062 | 57661062 | C | G    | CLP1    | exonic   | nonsynonymous SNV    | CLP1:NM_001142597:exon3:c.C712G;p.R238G,CLP1:NM_006831:exon3:c.C904G;p.R302G                                                                                                                                                                                                                                                                                                                                                                                                                                                                                                                                                                                                                                                                                                                                                                                                                                                                                                                                                                                                                                                                                                                                                                                      | 1.783 |          |          |          | Fam22_f_m_aF_aF_uF | 0/0;0/1;0/1;0/1;0/0 |

|       |          |          |   |   |          |        |                   |                                                                                                                                                                                                                                                                                                                                                                                                                                                                                                                                                                                                                                                                                                                                                                                                                                                                                                                                                                  |       |          |          |                        |                         |                     |
|-------|----------|----------|---|---|----------|--------|-------------------|------------------------------------------------------------------------------------------------------------------------------------------------------------------------------------------------------------------------------------------------------------------------------------------------------------------------------------------------------------------------------------------------------------------------------------------------------------------------------------------------------------------------------------------------------------------------------------------------------------------------------------------------------------------------------------------------------------------------------------------------------------------------------------------------------------------------------------------------------------------------------------------------------------------------------------------------------------------|-------|----------|----------|------------------------|-------------------------|---------------------|
| chr11 | 57801881 | 57801881 | C | T | CTNND1   | exonic | nonsynonymous SNV | CTNND1:NM_001085469:exon4:c.C802T;p.P268S,CTNND1:NM_001085463:exon5:c.C802T;p.P268S,CTNND1:NM_001085464:exon5:c.C802T;p.P268S,CTNND1:NM_001085465:exon5:c.C802T;p.P268S,CTNND1:NM_001085466:exon5:c.C802T;p.P268S,CTNND1:NM_001085467:exon5:c.C802T;p.P268S,CTNND1:NM_001085468:exon5:c.C802T;p.P268S,CTNND1:NM_001206890:exon5:c.C802T;p.P268S,CTNND1:NM_001085462:exon6:c.C1105T;p.P369S,CTNND1:NM_001206883:exon6:c.C943T;p.P315S,CTNND1:NM_001206884:exon6:c.C943T;p.P315S,CTNND1:NM_001206886:exon6:c.C943T;p.P315S,CTNND1:NM_001206887:exon6:c.C943T;p.P315S,CTNND1:NM_001206888:exon6:c.C943T;p.P315S,CTNND1:NM_001085458:exon7:c.C1105T;p.P369S,CTNND1:NM_001085459:exon7:c.C1105T;p.P369S,CTNND1:NM_001085460:exon7:c.C1105T;p.P369S,CTNND1:NM_001085461:exon7:c.C1105T;p.P369S,CTNND1:NM_001206885:exon7:c.C1105T;p.P369S,CTNND1:NM_001206889:exon7:c.C943T;p.P315S,CTNND1:NM_001206891:exon7:c.C943T;p.P315S,CTNND1:NM_0013331:exon7:c.C1105T;p.P369S | 1.004 | 2.25E-05 | 1.40E-05 | Fam13_f_m_aM           | 0/1;0/0;0/1             |                     |
| chr11 | 60936080 | 60936080 | C | T | TMEM132A | exonic | nonsynonymous SNV | TMEM132A:NM_017870:exon11:c.C2248T;p.R750C,TMEM132A:NM_178031:exon11:c.C2245T;p.R749C                                                                                                                                                                                                                                                                                                                                                                                                                                                                                                                                                                                                                                                                                                                                                                                                                                                                            | 1.109 | 0.0001   |          | Fam79_f_m_aM_uM        | 0/1;0/0;0/1;0/0         |                     |
| chr11 | 61009638 | 61009638 | G | A | CD6      | exonic | nonsynonymous SNV | CD6:NM_001254750:exon5:c.G848A;p.R283Q,CD6:NM_001254751:exon5:c.G848A;p.R283Q,CD6:NM_006725:exon5:c.G848A;p.R283Q                                                                                                                                                                                                                                                                                                                                                                                                                                                                                                                                                                                                                                                                                                                                                                                                                                                | 1.514 | 6.18E-05 | 2.79E-05 | Fam12_f_m_aM_uM_aM     | 0/0;0/1;0/0;0/0;0/1     |                     |
| chr11 | 61325657 | 61325657 | T | C | DDB1     | exonic | nonsynonymous SNV | DDB1:NM_001923:exon6:c.A716G;p.Y239C                                                                                                                                                                                                                                                                                                                                                                                                                                                                                                                                                                                                                                                                                                                                                                                                                                                                                                                             | 2.21  |          |          | Fam77_f_m_aM_aF_uM_uFs | 0/0;0/1;0/1;0/1;0/1;0/1 |                     |
| chr11 | 61731407 | 61731407 | G | A | DAGLA    | exonic | nonsynonymous SNV | DAGLA:NM_006133:exon9:c.G940A;p.A314T                                                                                                                                                                                                                                                                                                                                                                                                                                                                                                                                                                                                                                                                                                                                                                                                                                                                                                                            | 1.035 | 7.45E-05 |          | Fam21_f_m_aM_uM        | 0/0;0/1;0/1;0/0         |                     |
| chr11 | 61965497 | 61965497 | C | T | FTH1     | exonic | nonsynonymous SNV | FTH1:NM_002032:exon2:c.G133A;p.D45N                                                                                                                                                                                                                                                                                                                                                                                                                                                                                                                                                                                                                                                                                                                                                                                                                                                                                                                              | 1.636 |          |          | Fam24_f_m_aM_aM        | 0/0;0/1;0/1;0/1         |                     |
| chr11 | 62566920 | 62566920 | C | A | EEF1G    | exonic | nonsynonymous SNV | EEF1G:NM_001404:exon7:c.G743T;p.R248L                                                                                                                                                                                                                                                                                                                                                                                                                                                                                                                                                                                                                                                                                                                                                                                                                                                                                                                            | 1.094 |          | 6.98E-06 | Fam17_f_m_aM_uM        | 0/0;0/1;0/1;0/1         |                     |
| chr11 | 62571680 | 62571680 | T | G | EEF1G    | exonic | nonsynonymous SNV | EEF1G:NM_001404:exon4:c.A238C;p.S80R                                                                                                                                                                                                                                                                                                                                                                                                                                                                                                                                                                                                                                                                                                                                                                                                                                                                                                                             | 1.933 |          |          | Fam15_f_m_aM_aM        | 0/1;0/0;0/1;0/1         |                     |
| chr11 | 62575191 | 62575191 | A | G | TUT1     | exonic | nonsynonymous SNV | TUT1:NM_022830:exon9:c.T2528C;p.L843P                                                                                                                                                                                                                                                                                                                                                                                                                                                                                                                                                                                                                                                                                                                                                                                                                                                                                                                            | 1.015 |          |          | Fam71_f_m_aF           | 0/0;0/1;0/1             |                     |
| chr11 | 62649509 | 62649509 | C | T | INTS5    | exonic | nonsynonymous SNV | INTS5:NM_030628:exon2:c.G571A;p.D191N                                                                                                                                                                                                                                                                                                                                                                                                                                                                                                                                                                                                                                                                                                                                                                                                                                                                                                                            | 1.125 | 4.47E-05 | 2.09E-05 | Fam107_f_m_aM          | 0/0;0/1;0/1             |                     |
| chr11 | 62676909 | 62676909 | C | T | UBXN1    | exonic | nonsynonymous SNV | UBXN1:NM_001286077:exon8:c.G571A;p.E191K,UBXN1:NM_001286077:exon8:c.G748A;p.E250K,UBXN1:NM_015853:exon8:c.G748A;p.E250K                                                                                                                                                                                                                                                                                                                                                                                                                                                                                                                                                                                                                                                                                                                                                                                                                                          | 1.003 | 7.35E-05 | 1.12E-05 | Fam90_f_m_aF_dM        | 0/0;0/1;0/1;0/1         |                     |
| chr11 | 62752410 | 62752410 | C | T | ZBTB3    | exonic | nonsynonymous SNV | ZBTB3:NM_001363108:exon2:c.G1255A;p.E419K,ZBTB3:NM_001363109:exon2:c.G1255A;p.E419K,ZBTB3:NM_001370809:exon2:c.G1255A;p.E419K,ZBTB3:NM_024784:exon2:c.G1405A;p.E469K                                                                                                                                                                                                                                                                                                                                                                                                                                                                                                                                                                                                                                                                                                                                                                                             | 1.142 | 3.35E-05 | 6.98E-06 | Fam42_f_m_aM_uF        | 0/1;0/0;0/1;0/0         |                     |
| chr11 | 62834496 | 62834496 | C | T | WDR74    | exonic | nonsynonymous SNV | WDR74:NM_001307977:exon7:c.G650A;p.R217H,WDR74:NM_001369447:exon7:c.G692A;p.R231H,WDR74:NM_001369450:exon7:c.G650A;p.R217H,WDR74:NM_001369448:exon8:c.G245A;p.R82H,WDR74:NM_001369451:exon8:c.G650A;p.R217H,WDR74:NM_001369453:exon8:c.G650A;p.R217H,WDR74:NM_018093:exon8:c.G650A;p.R217H,WDR74:NM_001369449:exon9:c.G245A;p.R82H                                                                                                                                                                                                                                                                                                                                                                                                                                                                                                                                                                                                                               | 1.247 | 7.36E-05 | 7.76E-05 | 1.41E-05               | Fam55_f_m_aM_aM_dM      | 0/0;0/1;0/1;0/0;0/1 |
| chr11 | 62856328 | 62856328 | C | T | SLC3A2   | exonic | nonsynonymous SNV | SLC3A2:NM_001012662:exon1:c.C59T;p.P20L,SLC3A2:NM_001012664:exon1:c.C59T;p.P20L,SLC3A2:NM_001012662:exon1:c.C71T;p.S24L,SLC3A2:NM_001012664:exon1:c.C71T;p.S24L,SLC3A2:NM_002394:exon1:c.C59T;p.P20L                                                                                                                                                                                                                                                                                                                                                                                                                                                                                                                                                                                                                                                                                                                                                             | 1.408 |          |          | Fam106_f_m_aM          | 0/0;0/1;0/1             |                     |
| chr11 | 62856340 | 62856340 | C | T | SLC3A2   | exonic | nonsynonymous SNV | SLC3A2:NM_001012662:exon1:c.C71T;p.S24L,SLC3A2:NM_001012664:exon1:c.C71T;p.S24L,SLC3A2:NM_002394:exon1:c.C71T;p.S24L                                                                                                                                                                                                                                                                                                                                                                                                                                                                                                                                                                                                                                                                                                                                                                                                                                             | 1.267 | 7.34E-05 | 7.84E-05 | 2.79E-05               | Fam47_f_m_aM            | 0/1;0/0;0/1         |
| chr11 | 62881346 | 62881346 | G | C | SLC3A2   | exonic | nonsynonymous SNV | SLC3A2:NM_001013251:exon1:c.G323C;p.R108P,SLC3A2:NM_001012664:exon2:c.G440C;p.R147P,SLC3A2:NM_001012662:exon4:c.G629C;p.R210P,SLC3A2:NM_002394:exon4:c.G626C;p.R209P                                                                                                                                                                                                                                                                                                                                                                                                                                                                                                                                                                                                                                                                                                                                                                                             | 1.689 | 0.0006   | 3.59E-05 | 3.49E-05               | Fam95_f_m_aM_aM_uF      | 0/0;0/1;0/1;0/1;0/0 |
| chr11 | 62885185 | 62885185 | T | C | SLC3A2   | exonic | nonsynonymous SNV | SLC3A2:NM_001013251:exon6:c.T827C;p.I276T,SLC3A2:NM_001012664:exon7:c.T944C;p.I315T,SLC3A2:NM_001012662:exon9:c.T1133C;p.I378T,SLC3A2:NM_002394:exon9:c.T1130C;p.I377T                                                                                                                                                                                                                                                                                                                                                                                                                                                                                                                                                                                                                                                                                                                                                                                           | 1.582 | 3.35E-05 | 6.98E-06 | Fam31_f_m_aM_uF        | 0/0;0/1;0/1;0/0         |                     |
| chr11 | 62909824 | 62909824 | C | T | CHRM1    | exonic | nonsynonymous SNV | CHRM1:NM_000738:exon2:c.G1277A;p.R426Q                                                                                                                                                                                                                                                                                                                                                                                                                                                                                                                                                                                                                                                                                                                                                                                                                                                                                                                           | 1.694 | 4.47E-05 |          | Fam24_f_m_aM_aM        | 0/1;0/0;0/1;0/0         |                     |
| chr11 | 63014853 | 63014853 | G | T | SLC22A8  | exonic | nonsynonymous SNV | SLC22A8:NM_001184732:exon2:c.C106A;p.L36M,SLC22A8:NM_004254:exon2:c.C106A;p.L36M                                                                                                                                                                                                                                                                                                                                                                                                                                                                                                                                                                                                                                                                                                                                                                                                                                                                                 | 1.056 | 7.34E-05 | 0.0001   | 4.19E-05               | Fam120_f_m_aM_aM        | 0/1;0/0;0/1;0/1     |
| chr11 | 63952522 | 63952522 | C | T | NAA40    | exonic | nonsynonymous SNV | NAA40:NM_001300800:exon5:c.C304T;p.H102Y,NAA40:NM_024771:exon5:c.C367T;p.H123Y                                                                                                                                                                                                                                                                                                                                                                                                                                                                                                                                                                                                                                                                                                                                                                                                                                                                                   | 1.274 | 0.0001   | 0.0004   | 0.0002                 | Fam94_f_m_aM            | 0/1;0/0;0/1         |
| chr11 | 64185962 | 64185962 | G | A | STIP1    | exonic | stopgain          | STIP1:NM_001282652:exon1:c.G138A;p.W46X                                                                                                                                                                                                                                                                                                                                                                                                                                                                                                                                                                                                                                                                                                                                                                                                                                                                                                                          | 0.306 |          | 0.0003   | 1.40E-05               | Fam108_f_m_aM           | 0/0;0/1;0/1         |
| chr11 | 64195749 | 64195749 | C | A | STIP1    | exonic | nonsynonymous SNV | STIP1:NM_001282652:exon5:c.C749A;p.P250H,STIP1:NM_001282653:exon5:c.C536A;p.P179H,STIP1:NM_006819:exon5:c.C608A;p.P203H                                                                                                                                                                                                                                                                                                                                                                                                                                                                                                                                                                                                                                                                                                                                                                                                                                          | 1.077 |          | 2.23E-05 | 6.98E-06               | Fam16_f_m_aM_aM         | 0/0;0/1;0/1;0/1     |
| chr11 | 64197918 | 64197918 | T | C | STIP1    | exonic | nonsynonymous SNV | STIP1:NM_001282652:exon8:c.T1108C;p.Y370H,STIP1:NM_001282653:exon8:c.T895C;p.Y299H,STIP1:NM_006819:exon8:c.T967C;p.Y323H                                                                                                                                                                                                                                                                                                                                                                                                                                                                                                                                                                                                                                                                                                                                                                                                                                         | 1.601 | 3.35E-05 | 6.98E-06 | Fam115_f_m_aF_aM_aF    | 0/1;0/0;0/1;0/1;0/1     |                     |

|       |          |          |   |   |                |        |                   |                                                                                                                                                                                                                                                                                                                                                                                                                                                                                                                    |       |          |          |                     |                     |                 |
|-------|----------|----------|---|---|----------------|--------|-------------------|--------------------------------------------------------------------------------------------------------------------------------------------------------------------------------------------------------------------------------------------------------------------------------------------------------------------------------------------------------------------------------------------------------------------------------------------------------------------------------------------------------------------|-------|----------|----------|---------------------|---------------------|-----------------|
| chr11 | 64242551 | 64242551 | A | T | FKBP2          | exonic | nonsynonymous SNV | FKBP2:NM_001135208:exon2:c.A164T:p.H55L,FKBP2:NM_001370360:exon2:c.A164T:p.H55L,FKBP2:NM_001370362:exon2:c.A164T:p.H55L,FKBP2:NM_001370363:exon2:c.A164T:p.H55L,FKBP2:NM_001370365:exon2:c.A251T:p.H84L,FKBP2:NM_001370367:exon2:c.A5T:p.H2L,FKBP2:NM_004470:exon2:c.A164T:p.H55L,FKBP2:NM_057092:exon2:c.A164T:p.H55L                                                                                                                                                                                             | 1.665 |          |          | Fam57_f_m_aM_uF     | 0/1;0/0;0/1;0/1     |                 |
| chr11 | 64262726 | 64262726 | C | T | PLCB3          | exonic | nonsynonymous SNV | PLCB3:NM_001184883:exon17:c.C2072T:p.T691M,PLCB3:NM_000932:exon19:c.C2273T:p.T758M,PLCB3:NM_001316314:exon19:c.C2273T:p.T758M,RP56KA4:NM_001006944:exon11:c.C1219T:p.R407W,RP56KA4:NM_001300802:exon11:c.C1216T:p.R406W,RP56KA4:NM_001318361:exon11:c.C1048T:p.R350W,RP56KA4:NM_003942:exon11:c.C1237T:p.R413W,RP56KA4:NM_001006944:exon11:c.C1219T:p.R407W,RP56KA4:NM_001300802:exon11:c.C1216T:p.R406W,RP56KA4:NM_001318361:exon11:c.C1048T:p.R350W,RP56KA4:NM_003942:exon11:c.C1237T:p.R413W                    | 1.95  | 1.12E-05 | 6.98E-06 | Fam16_f_m_aM_aM     | 0/0;0/1;0/1;0/1     |                 |
| chr11 | 64368504 | 64368504 | C | T | RPS6KA4        | exonic | nonsynonymous SNV | RP56KA4:NM_001006944:exon11:c.C1219T:p.R407W,RP56KA4:NM_001300802:exon11:c.C1216T:p.R406W,RP56KA4:NM_001318361:exon11:c.C1048T:p.R350W,RP56KA4:NM_003942:exon11:c.C1237T:p.R413W                                                                                                                                                                                                                                                                                                                                   | 2.035 | 1.80E-05 | 2.09E-05 | Fam12_f_m_aM_uM_aM  | 0/0;0/1;0/1;0/1;0/0 |                 |
| chr11 | 64368504 | 64368504 | C | T | RPS6KA4        | exonic | nonsynonymous SNV | RP56KA4:NM_001006944:exon11:c.C1219T:p.R407W,RP56KA4:NM_001300802:exon11:c.C1216T:p.R406W,RP56KA4:NM_001318361:exon11:c.C1048T:p.R350W,RP56KA4:NM_003942:exon11:c.C1237T:p.R413W                                                                                                                                                                                                                                                                                                                                   | 2.035 | 1.80E-05 | 2.09E-05 | Fam21_f_m_aM_uM     | 0/1;0/0;0/1;0/0     |                 |
| chr11 | 64770355 | 64770355 | C | G | SF1            | exonic | nonsynonymous SNV | SF1:NM_001178030:exon4:c.G665C:p.R222P,SF1:NM_00178031:exon4:c.G212C:p.R71P,SF1:NM_001346363:exon4:c.G290C:p.R97P,SF1:NM_001346364:exon4:c.G290C:p.R97P,SF1:NM_004630:exon4:c.G290C:p.R97P,SF1:NM_201995:exon4:c.G290C:p.R97P,SF1:NM_201997:exon4:c.G290C:p.R97P,SF1:NM_201998:exon4:c.G290C:p.R97P                                                                                                                                                                                                                | 2.74  |          |          | Fam51_f_m_aM_uF     | 0/0;0/1;0/1;0/0     |                 |
| chr11 | 64778203 | 64778203 | G | A | SF1            | exonic | nonsynonymous SNV | SF1:NM_001178030:exon1:c.C190T:p.P64S                                                                                                                                                                                                                                                                                                                                                                                                                                                                              | 1.653 | 7.72E-05 | 7.80E-05 | Fam62_f_m_aM_aM     | 0/0;0/1;0/0;0/1     |                 |
| chr11 | 64808019 | 64808019 | C | A | MEN1           | exonic | nonsynonymous SNV | MEN1:NM_000244:exon3:c.G541T:p.A181S,MEN1:NM_001370251:exon3:c.G526T:p.A176S,MEN1:NM_001370259:exon3:c.G526T:p.A176S,MEN1:NM_001370260:exon3:c.G526T:p.A176S,MEN1:NM_001370261:exon3:c.G526T:p.A176S,MEN1:NM_001370262:exon3:c.G526T:p.A176S,MEN1:NM_001370263:exon3:c.G526T:p.A176S,MEN1:NM_130799:exon3:c.G526T:p.A176S,MEN1:NM_130800:exon3:c.G541T:p.A181S,MEN1:NM_130801:exon3:c.G541T:p.A181S,MEN1:NM_130802:exon3:c.G541T:p.A181S,MEN1:NM_130803:exon3:c.G541T:p.A181S,MEN1:NM_130804:exon4:c.G541T:p.A181S | 2.079 | 1.12E-05 | 1.40E-05 | Fam92_f_m_aM_raM    | 0/1;0/0;0/1;0/1     |                 |
| chr11 | 65041339 | 65041339 | C | T | SAC3D1         | exonic | nonsynonymous SNV | SAC3D1:NM_001367486:exon1:c.C47T:p.P16L,SAC3D1:NM_001367488:exon1:c.C47T:p.P16L,SAC3D1:NM_013299:exon1:c.C47T:p.P16L,SAC3D1:NM_001367485:exon2:c.C47T:p.P16L,SAC3D1:NM_001367487:exon2:c.C47T:p.P16L                                                                                                                                                                                                                                                                                                               | 1.252 | 5.42E-05 | 6.98E-06 | Fam85_f_m_aM_aM     | 0/1;0/0;0/1;0/1     |                 |
| chr11 | 65041527 | 65041527 | G | A | SAC3D1         | exonic | nonsynonymous SNV | SAC3D1:NM_001367486:exon1:c.G235A:p.V79M,SAC3D1:NM_001367488:exon1:c.G235A:p.V79M,SAC3D1:NM_013299:exon1:c.G235A:p.V79M,SAC3D1:NM_001367485:exon2:c.G235A:p.V79M,SAC3D1:NM_001367487:exon2:c.G235A:p.V79M                                                                                                                                                                                                                                                                                                          | 1.241 | 7.36E-05 | 3.66E-05 | 1.40E-05            | Fam79_f_m_aM_uM     | 0/0;0/1;0/1;0/0 |
| chr11 | 65088034 | 65088034 | C | T | ZFPL1          | exonic | nonsynonymous SNV | ZFPL1:NM_006782:exon8:c.C853T:p.R285C                                                                                                                                                                                                                                                                                                                                                                                                                                                                              | 1.004 |          | 6.98E-06 | Fam115_f_m_aF_aM_aF | 0/1;0/0;0/1;0/1;0/1 |                 |
| chr11 | 65109443 | 65109443 | C | T | VP551          | exonic | nonsynonymous SNV | VP551:NM_013265:exon6:c.C1607T:p.T536M                                                                                                                                                                                                                                                                                                                                                                                                                                                                             | 1.545 | 7.35E-05 | 0.0002   | 7.68E-05            | Fam15_f_m_aM_aM     | 0/0;0/1;0/0;0/1 |
| chr11 | 65584987 | 65584987 | T | C | EHBP1L1        | exonic | nonsynonymous SNV | EHBP1L1:NM_001351087:exon11:c.T1055C:p.V352A,EHBP1L1:NM_001099409:exon12:c.T3329C:p.V110A                                                                                                                                                                                                                                                                                                                                                                                                                          | 1.808 | 0.0002   | 0.0003   | 9.07E-05            | Fam89_f_m_aM        | 0/1;0/0;0/1     |
| chr11 | 65590165 | 65590165 | C | T | EHBP1L1        | exonic | nonsynonymous SNV | EHBP1L1:NM_001351087:exon14:c.C1864T:p.R622W,EHBP1L1:NM_001099409:exon15:c.C4138T:p.R1380W                                                                                                                                                                                                                                                                                                                                                                                                                         | 1.692 | 0.0002   | 0.0004   | 9.77E-05            | Fam117_f_m_aM_aF    | 0/0;0/1;0/1;0/0 |
| chr11 | 65646775 | 65646775 | C | G | SIPA1          | exonic | nonsynonymous SNV | SIPA1:NM_006747:exon8:c.C1741G:p.L581V                                                                                                                                                                                                                                                                                                                                                                                                                                                                             | 1.809 |          |          | Fam114_f_m_aM       | 0/0;0/1;0/1         |                 |
| chr11 | 65647531 | 65647531 | C | T | SIPA1          | exonic | nonsynonymous SNV | SIPA1:NM_006747:exon9:c.C2179T:p.R727C                                                                                                                                                                                                                                                                                                                                                                                                                                                                             | 3     |          |          | Fam61_f_m_aM        | 0/0;0/1;0/1         |                 |
| chr11 | 65720349 | 65720349 | C | G | RNA5H2C        | exonic | nonsynonymous SNV | RNA5H2C:NM_032193:exon2:c.G241C:p.G81R                                                                                                                                                                                                                                                                                                                                                                                                                                                                             | 1.355 |          |          | Fam90_f_m_aF_dM     | 0/0;0/1;0/1;0/1     |                 |
| chr11 | 65961910 | 65961910 | G | A | SART1          | exonic | nonsynonymous SNV | SART1:NM_005146:exon1:c.G130A:p.G445                                                                                                                                                                                                                                                                                                                                                                                                                                                                               | 2.5   |          |          | Fam28_f_m_aF_uF     | 0/0;0/1;0/1;0/1     |                 |
| chr11 | 66013323 | 66013323 | C | T | CST6           | exonic | nonsynonymous SNV | CST6:NM_001323:exon3:c.C373T:p.R125C                                                                                                                                                                                                                                                                                                                                                                                                                                                                               | 1.467 | 9.83E-05 | 4.89E-05 | Fam121_f_m_aF_aM    | 0/0;0/1;0/1;0/1     |                 |
| chr11 | 66063530 | 66063530 | C | A | SF3B2          | exonic | nonsynonymous SNV | SF3B2:NM_006842:exon18:c.C2216A:p.T739N,KLC2:NM_001134774:exon13:c.G1382C:p.G461A,KLC2:NM_001134775:exon14:c.G1613C:p.G538A,KLC2:NM_001134776:exon14:c.G1613C:p.G538A,KLC2:NM_001318734:exon14:c.G1613C:p.G538A,KLC2:NM_022822:exon14:c.G1613C:p.G538A                                                                                                                                                                                                                                                             | 2.155 |          |          | Fam122_f_m_aM       | 0/0;0/1;0/1         |                 |
| chr11 | 66266103 | 66266103 | G | C | KLC2           | exonic | nonsynonymous SNV | KLC2:NM_001134774:exon13:c.G1382C:p.G461A,KLC2:NM_001134775:exon14:c.G1613C:p.G538A,KLC2:NM_001134776:exon14:c.G1613C:p.G538A,KLC2:NM_001318734:exon14:c.G1613C:p.G538A,KLC2:NM_022822:exon14:c.G1613C:p.G538A                                                                                                                                                                                                                                                                                                     | 1.433 | 3.28E-05 |          | Fam36_f_m_aM_uM     | 0/1;0/0;0/1;0/0     |                 |
| chr11 | 66282286 | 66282286 | G | A | CNIH2          | exonic | nonsynonymous SNV | CNIH2:NM_182553:exon2:c.G109A:p.D37N                                                                                                                                                                                                                                                                                                                                                                                                                                                                               | 2.459 | 1.13E-05 | 6.98E-06 | Fam47_f_m_aM        | 0/1;0/0;0/1         |                 |
| chr11 | 66644124 | 66644124 | G | A | RBM14-RBM4;RBF | exonic | nonsynonymous SNV | RBM14-RBM4:NM_001198845:exon2:c.G1012A:p.A338T,RBM4:NM_002896:exon3:c.G1087A:p.A363T                                                                                                                                                                                                                                                                                                                                                                                                                               | 1.3   | 1.14E-05 |          | Fam9_f_m_aM_dM_uF   | 0/1;0/0;0/1;0/0;0/0 |                 |
| chr11 | 66845018 | 66845018 | C | G | RCE1           | exonic | nonsynonymous SNV | RCE1:NM_001032279:exon5:c.C289G:p.P97A,RCE1:NM_005133:exon5:c.C601G:p.P201A                                                                                                                                                                                                                                                                                                                                                                                                                                        | 1.378 |          |          | Fam68_f_m_aF_uF_uM  | 0/0;0/1;0/1;0/0;0/1 |                 |
| chr11 | 66845206 | 66845206 | G | C | RCE1           | exonic | nonsynonymous SNV | RCE1:NM_001032279:exon6:c.G348C:p.Q116H                                                                                                                                                                                                                                                                                                                                                                                                                                                                            | 1.099 |          |          | Fam73_f_m_aF_dM     | 0/1;0/0;0/1;0/0     |                 |
| chr11 | 66858165 | 66858165 | G | A | LRFN4          | exonic | nonsynonymous SNV | LRFN4:NM_024036:exon1:c.G421A:p.D141N,LRFN4:NM_01363524:exon2:c.G421A:p.D141N                                                                                                                                                                                                                                                                                                                                                                                                                                      | 1.845 |          |          | Fam9_f_m_aM_dM_uF   | 0/0;0/1;0/1;0/1;0/1 |                 |
| chr11 | 66870337 | 66870337 | G | A | PC             | exonic | nonsynonymous SNV | PC:NM_022172:exon7:c.C868T:p.R290W,PC:NM_000920:exon8:c.C868T:p.R290W,PC:NM_001040716:exon9:c.C868T:p.R290W                                                                                                                                                                                                                                                                                                                                                                                                        | 1.789 | 7.36E-05 | 2.26E-05 | 1.40E-05            | Fam74_f_m_aM_uM     | 0/1;0/0;0/1;0/0 |

|       |           |           |   |   |          |          |                   |                                                                                                                                                                                                                                                                                                                                                                                    |       |          |          |                              |                     |
|-------|-----------|-----------|---|---|----------|----------|-------------------|------------------------------------------------------------------------------------------------------------------------------------------------------------------------------------------------------------------------------------------------------------------------------------------------------------------------------------------------------------------------------------|-------|----------|----------|------------------------------|---------------------|
| chr11 | 67283739  | 67283739  | G | T | GRK2     | exonic   | nonsynonymous SNV | GRK2:NM_001619:exon16:c.G1361T:p.R454L                                                                                                                                                                                                                                                                                                                                             | 1.079 |          | 6.72E-05 | Fam75_f_m_aM                 | 0/1;0/0;0/1         |
| chr11 | 67290442  | 67290442  | G | A | ANKRD13D | exonic   | nonsynonymous SNV | ANKRD13D:NM_207354:exon3:c.G347A:p.R116H,ANKRD13D:NM_001347901:exon4:c.G86A:p.R29H                                                                                                                                                                                                                                                                                                 | 1.337 |          | 8.50E-05 | 1.40E-05 Fam79_f_m_aM_uM     | 0/0;0/1;0/1;0/0     |
| chr11 | 67365588  | 67365588  | G | A | CLCF1    | exonic   | nonsynonymous SNV | CLCF1:NM_001166212:exon3:c.C196T:p.P66S,CLCF1:NM_013246:exon3:c.C226T:p.P76S                                                                                                                                                                                                                                                                                                       | 1.114 |          |          | 1.40E-05 Fam66_f_m_aM        | 0/0;0/1;0/1         |
| chr11 | 67451967  | 67451967  | T | C | GPR152   | exonic   | nonsynonymous SNV | GPR152:NM_206997:exon1:c.A758G:p.Y253C                                                                                                                                                                                                                                                                                                                                             | 1.079 |          | 3.38E-05 | Fam81_f_m_aM_uM              | 0/0;0/1;0/1;0/0     |
| chr11 | 67451967  | 67451967  | T | C | GPR152   | exonic   | nonsynonymous SNV | GPR152:NM_206997:exon1:c.A758G:p.Y253C                                                                                                                                                                                                                                                                                                                                             | 1.079 |          | 3.38E-05 | Fam84_f_m_aF                 | 0/1;0/0;0/1         |
| chr11 | 67493965  | 67493965  | G | A | PITPNM1  | exonic   | nonsynonymous SNV | PITPNM1:NM_001130848:exon20:c.C2962T:p.R988C,PITPNM1:NM_004910:exon20:c.C2965T:p.R989C                                                                                                                                                                                                                                                                                             | 1.775 | 7.34E-05 | 3.45E-05 | 6.98E-06 Fam40_f_m_aM_aM     | 0/1;0/0;0/1;0/1     |
| chr11 | 67497324  | 67497324  | G | A | PITPNM1  | exonic   | nonsynonymous SNV | PITPNM1:NM_001130848:exon14:c.C2053T:p.R685C,PITPNM1:NM_004910:exon14:c.C2053T:p.R685C                                                                                                                                                                                                                                                                                             | 1.215 |          | 7.98E-05 | 2.79E-05 Fam65_f_m_aM_uF_dF  | 0/1;0/0;0/1;0/0;0/0 |
| chr11 | 68213475  | 68213475  | A | G | KMT5B    | splicing | .                 | .                                                                                                                                                                                                                                                                                                                                                                                  | 0.19  |          |          | 7.36E-06 Fam12_f_m_aM_uM_aM  | 0/1;0/0;0/1;0/1;0/0 |
| chr11 | 68438611  | 68438611  | A | G | LRP5     | exonic   | nonsynonymous SNV | LRP5:NM_001291902:exon20:c.A2534G:p.Y845C,LRP5:NM_002335:exon20:c.A4277G:p.Y1426C                                                                                                                                                                                                                                                                                                  | 1.237 |          | 1.13E-05 | Fam89_f_m_aM                 | 0/1;0/0;0/1         |
| chr11 | 68761621  | 68761621  | T | C | CPT1A    | exonic   | nonsynonymous SNV | CPT1A:NM_001031847:exon16:c.A1942G:p.M648V,CPT1A:NM_001876:exon16:c.A1942G:p.M648V                                                                                                                                                                                                                                                                                                 | 1.164 |          |          | Fam55_f_m_aM_aM_dM           | 0/0;0/1;0/1;0/0;0/1 |
| chr11 | 68761624  | 68761624  | C | T | CPT1A    | exonic   | nonsynonymous SNV | CPT1A:NM_001031847:exon16:c.G1939A:p.A647T,CPT1A:NM_001876:exon16:c.G1939A:p.A647T                                                                                                                                                                                                                                                                                                 | 1.19  |          | 3.35E-05 | 6.98E-06 Fam79_f_m_aM_uM     | 0/0;0/1;0/1;0/0     |
| chr11 | 69005634  | 69005634  | A | G | MRGPRF   | exonic   | nonsynonymous SNV | MRGPRF:NM_001098515:exon3:c.T676C:p.C226R,MRGPRF:NM_145015:exon3:c.T676C:p.C226R                                                                                                                                                                                                                                                                                                   | 1.746 |          | 6.98E-06 | Fam5_f_m_aM                  | 0/0;0/1;0/1         |
| chr11 | 69005846  | 69005846  | C | T | MRGPRF   | exonic   | nonsynonymous SNV | MRGPRF:NM_001098515:exon3:c.G464A:p.R155Q,MRGPRF:NM_145015:exon3:c.G464A:p.R155Q                                                                                                                                                                                                                                                                                                   | 1.382 | 7.35E-05 | 4.11E-05 | 2.09E-05 Fam37_f_m_aF_uM     | 0/1;0/0;0/1;0/0     |
| chr11 | 70485650  | 70485650  | G | T | SHANK2   | exonic   | nonsynonymous SNV | SHANK2:NM_133266:exon10:c.C2879A:p.P960H,SHANK2:NM_012309:exon24:c.C4643A:p.P1548H                                                                                                                                                                                                                                                                                                 | 1.346 |          |          | Fam14_f_m_aM_aM              | 0/1;0/0;0/0;0/1     |
| chr11 | 72004298  | 72004298  | C | T | NUMA1    | exonic   | nonsynonymous SNV | NUMA1:NM_001286561:exon25:c.G6008A:p.R2003Q,NUMA1:NM_006185:exon25:c.G6050A:p.R2017Q                                                                                                                                                                                                                                                                                               | 1.053 |          | 9.81E-05 | 1.40E-05 Fam123_f_aF         | 0/1;0/1             |
| chr11 | 72006074  | 72006074  | G | A | NUMA1    | exonic   | nonsynonymous SNV | NUMA1:NM_001286561:exon22:c.C5611T:p.R1871C,NUMA1:NM_006185:exon22:c.C5653T:p.R1885C                                                                                                                                                                                                                                                                                               | 1.15  | 0.0003   | 0.0004   | 0.0001 Fam110_f_m_aM_aM_uMs  | 0/0;0/1;0/0;0/1;0/0 |
| chr11 | 72007230  | 72007230  | G | A | NUMA1    | exonic   | nonsynonymous SNV | NUMA1:NM_001286561:exon21:c.C5380T:p.R1794C,NUMA1:NM_006185:exon21:c.C5422T:p.R1808C                                                                                                                                                                                                                                                                                               | 1.101 |          | 6.73E-05 | 2.79E-05 Fam23_f_m_aM_dF_uFs | 0/0;0/1;0/1;0/0;0/0 |
| chr11 | 72013241  | 72013241  | C | T | NUMA1    | exonic   | nonsynonymous SNV | NUMA1:NM_006185:exon15:c.G4262A:p.R1421Q,NUMA1:NM_001286561:exon16:c.G4262A:p.R1421Q                                                                                                                                                                                                                                                                                               | 1.054 |          | 1.13E-05 | Fam28_f_m_aF_uF              | 0/0;0/1;0/1;0/1     |
| chr11 | 72293398  | 72293398  | A | G | CLPB     | exonic   | nonsynonymous SNV | CLPB:NM_001258393:exon15:c.T1916C:p.L639P,CLPB:NM_001258393:exon16:c.T2003C:p.L668P,CLPB:NM_030813:exon17:c.T2093C:p.L698P,CLPB:NM_001258394:exon18:c.T1958C:p.L653P                                                                                                                                                                                                               | 1.404 |          |          | Fam45_f_m_aM_uF              | 0/1;0/0;0/1;0/0     |
| chr11 | 72705855  | 72705855  | C | T | ARAP1    | exonic   | nonsynonymous SNV | ARAP1:NM_001135190:exon11:c.G1024A:p.V342M,ARAP1:NM_001369489:exon11:c.G1024A:p.V342M,ARAP1:NM_015242:exon11:c.G1024A:p.V342M,ARAP1:NM_001040118:exon13:c.G1759A:p.V587M                                                                                                                                                                                                           | 1.06  | 7.35E-05 | 0.0002   | 9.07E-05 Fam44_f_m_aM_uF     | 0/1;0/0;0/1;0/0     |
| chr11 | 73296697  | 73296697  | G | T | P2RY6    | exonic   | nonsynonymous SNV | P2RY6:NM_001277208:exon2:c.G482T:p.R161L,P2RY6:NM_001277204:exon3:c.G179T:p.R60L,P2RY6:NM_001277206:exon3:c.G179T:p.R60L,P2RY6:NM_001277207:exon3:c.G179T:p.R60L,P2RY6:NM_176797:exon3:c.G179T:p.R60L,P2RY6:NM_001277205:exon4:c.G179T:p.R60L,P2RY6:NM_176796:exon4:c.G179T:p.R60L,P2RY6:NM_176798:exon4:c.G179T:p.R60L                                                            | 1.282 |          | 0.0002   | 9.08E-05 Fam88_f_m_aF        | 0/0;0/1;0/1         |
| chr11 | 73296910  | 73296910  | C | T | P2RY6    | exonic   | nonsynonymous SNV | P2RY6:NM_001277208:exon2:c.C695T:p.P232L,P2RY6:NM_001277204:exon3:c.C392T:p.P131L,P2RY6:NM_001277206:exon3:c.C392T:p.P131L,P2RY6:NM_001277207:exon3:c.C392T:p.P131L,P2RY6:NM_176797:exon3:c.C392T:p.P131L,P2RY6:NM_001277205:exon4:c.C392T:p.P131L,P2RY6:NM_176796:exon4:c.C392T:p.P131L,P2RY6:NM_176798:exon4:c.C392T:p.P131L                                                     | 1.159 |          | 3.28E-05 | 1.40E-05 Fam119_f_m_aM_aM    | 0/1;0/0;0/1;0/1     |
| chr11 | 73365499  | 73365499  | A | G | ARHGEF17 | exonic   | nonsynonymous SNV | ARHGEF17:NM_014786:exon19:c.A5660G:p.H1887R                                                                                                                                                                                                                                                                                                                                        | 1.262 | 0.0003   | 0.0001   | 3.49E-05 Fam81_f_m_aM_uM     | 0/0;0/1;0/1;0/1     |
| chr11 | 76140830  | 76140830  | G | A | UVRAG    | exonic   | nonsynonymous SNV | UVRAG:NM_003369:exon15:c.G1517A:p.R506Q                                                                                                                                                                                                                                                                                                                                            | 1.015 |          | 0.0004   | 3.49E-05 Fam26_f_m_aM_uM     | 0/0;0/1;0/1;0/0     |
| chr11 | 76187078  | 76187078  | T | G | WNT11    | exonic   | nonsynonymous SNV | WNT11:NM_004626:exon5:c.A1052C:p.Y351S                                                                                                                                                                                                                                                                                                                                             | 1.237 |          | 3.27E-05 | 1.40E-05 Fam10_f_m_aM_uF     | 0/0;0/1;0/1;0/1     |
| chr11 | 77676889  | 77676889  | C | T | RSF1     | exonic   | nonsynonymous SNV | RSF1:NM_016578:exon13:c.G3244A:p.A1082T                                                                                                                                                                                                                                                                                                                                            | 1.614 | 7.34E-05 | 0.0002   | 4.19E-05 Fam80_f_m_aM_uM     | 0/0;0/1;0/1;0/1     |
| chr11 | 78676202  | 78676202  | G | A | TENM4    | exonic   | nonsynonymous SNV | TENM4:NM_001098816:exon30:c.C5446T:p.R1816C                                                                                                                                                                                                                                                                                                                                        | 1.117 |          |          | Fam100_f_m_aF                | 0/0;0/1;0/1         |
| chr11 | 82733674  | 82733674  | C | G | FAM181B  | exonic   | nonsynonymous SNV | FAM181B:NM_175885:exon1:c.G56C:p.G19A                                                                                                                                                                                                                                                                                                                                              | 1.885 |          | 9.97E-05 | 6.99E-06 Fam82_f_m_aM_uF     | 0/0;0/1;0/1;0/0     |
| chr11 | 83541708  | 83541708  | C | A | DLG2     | exonic   | nonsynonymous SNV | DLG2:NM_001142702:exon3:c.G222T:p.E74D,DLG2:NM_01142700:exon12:c.G1467T:p.E489D,DLG2:NM_001206769:exon14:c.G1893T:p.E631D,DLG2:NM_001300983:exon15:c.G1776T:p.E592D,DLG2:NM_001351276:exon15:c.G1833T:p.E611D,DLG2:NM_001364:exon15:c.G1776T:p.E592D,DLG2:NM_001351275:exon18:c.G2124T:p.E708D,DLG2:NM_001351274:exon19:c.G2127T:p.E709D,DLG2:NM_001142699:exon20:c.G2091T:p.E697D | 1.59  |          | 0.0005   | 1.40E-05 Fam116_f_m_aM_aF    | 0/0;0/1;0/0;0/1     |
| chr11 | 86559712  | 86559712  | G | A | ME3      | exonic   | nonsynonymous SNV | ME3:NM_001014811:exon2:c.C295T:p.R99W,ME3:NM_001351934:exon3:c.C295T:p.R99W,ME3:NM_006680:exon3:c.C295T:p.R99W                                                                                                                                                                                                                                                                     | 1.142 |          | 7.82E-05 | 4.19E-05 Fam101_f_m_aM       | 0/1;0/0;0/1         |
| chr11 | 87309530  | 87309530  | G | A | TMEM135  | exonic   | nonsynonymous SNV | TMEM135:NM_001168724:exon9:c.G728A:p.G243E,TMEM135:NM_022918:exon10:c.G794A:p.G265E                                                                                                                                                                                                                                                                                                | 1.34  |          |          | Fam31_f_m_aM_uF              | 0/1;0/0;0/1;0/1     |
| chr11 | 95026444  | 95026444  | G | A | KDM4E    | exonic   | nonsynonymous SNV | KDM4E:NM_001161630:exon1:c.G887A:p.R296Q                                                                                                                                                                                                                                                                                                                                           | 1.215 |          | 0.0002   | 3.49E-05 Fam20_f_m_aM_uF     | 0/1;0/0;0/1;0/1     |
| chr11 | 101489055 | 101489055 | T | C | TRPC6    | exonic   | nonsynonymous SNV | TRPC6:NM_004621:exon4:c.A1175G:p.Y392C                                                                                                                                                                                                                                                                                                                                             | 1.136 |          | 3.27E-05 | Fam56_f_m_aF_aM              | 0/0;0/1;0/0;0/1     |
| chr11 | 105924660 | 105924660 | G | A | GRIA4    | exonic   | nonsynonymous SNV | GRIA4:NM_000829:exon12:c.G1738A:p.D580N,GRIA4:NM_001077243:exon12:c.G1738A:p.D580N                                                                                                                                                                                                                                                                                                 | 2.02  | 0.0002   | 0.0002   | 7.68E-05 Fam87_f_m_aM_uM     | 0/0;0/1;0/1;0/1     |

|       |           |           |   |   |         |        |                   |                                                                                                                                                                                                                                                                                                                                                                                                                                                                                                                                                                                                                                                                                                                                                                                                                                                                                                                                                                  |       |          |          |                      |                     |                 |
|-------|-----------|-----------|---|---|---------|--------|-------------------|------------------------------------------------------------------------------------------------------------------------------------------------------------------------------------------------------------------------------------------------------------------------------------------------------------------------------------------------------------------------------------------------------------------------------------------------------------------------------------------------------------------------------------------------------------------------------------------------------------------------------------------------------------------------------------------------------------------------------------------------------------------------------------------------------------------------------------------------------------------------------------------------------------------------------------------------------------------|-------|----------|----------|----------------------|---------------------|-----------------|
| chr11 | 108094413 | 108094413 | A | T | CUL5    | exonic | nonsynonymous SNV | CUL5:NM_003478:exon14:c.A1466T:p.Y489F                                                                                                                                                                                                                                                                                                                                                                                                                                                                                                                                                                                                                                                                                                                                                                                                                                                                                                                           | 1.119 | 3.50E-05 | 2.09E-05 | Fam70_f_m_aM         | 0/0;0/1;0/1         |                 |
| chr11 | 111840702 | 111840702 | A | G | ALG9    | exonic | nonsynonymous SNV | ALG9:NM_001352409:exon9:c.T613C:p.Y205H,ALG9:NM_01352418:exon9:c.T1003C:p.Y335H,ALG9:NM_001352423:exon9:c.T490C:p.Y164H,ALG9:NM_001077690:exon10:c.T126C:p.Y376H,ALG9:NM_001077691:exon10:c.T613C:p.Y205H,ALG9:NM_001077692:exon10:c.T613C:p.Y205H,ALG9:NM_001352410:exon10:c.T613C:p.Y205H,ALG9:NM_001352411:exon10:c.T613C:p.Y205H,ALG9:NM_001352412:exon10:c.T613C:p.Y205H,ALG9:NM_001352413:exon10:c.T613C:p.Y205H,ALG9:NM_001352414:exon10:c.T613C:p.Y205H,ALG9:NM_001352415:exon10:c.T613C:p.Y205H,ALG9:NM_01352416:exon10:c.T613C:p.Y205H,ALG9:NM_001352417:exon10:c.T1126C:p.Y376H,ALG9:NM_001352419:exon10:c.T613C:p.Y205H,ALG9:NM_001352420:exon10:c.T613C:p.Y205H,ALG9:NM_001352421:exon10:c.T613C:p.Y205H,ALG9:NM_024740:exon10:c.T1126C:p.Y376H,ALG9:NM_001352422:exon11:c.T538C:p.Y180H<br>CRYAB:NM_001289808:exon1:c.C64T:p.R22C,CRYAB:NM_01289807:exon2:c.C64T:p.R22C,CRYAB:NM_001368245:exon2:c.C64T:p.R22C,CRYAB:NM_001885:exon2:c.C64T:p.R22C | 1.176 |          |          | Fam121_f_m_aF_aM     | 0/1;0/0;0/0;0/1     |                 |
| chr11 | 111911661 | 111911661 | G | A | CRYAB   | exonic | nonsynonymous SNV | CRYAB:NM_001289808:exon1:c.C64T:p.R22C,CRYAB:NM_01289807:exon2:c.C64T:p.R22C,CRYAB:NM_001368245:exon2:c.C64T:p.R22C,CRYAB:NM_001885:exon2:c.C64T:p.R22C                                                                                                                                                                                                                                                                                                                                                                                                                                                                                                                                                                                                                                                                                                                                                                                                          | 1.079 | 6.88E-05 | 6.98E-06 | Fam114_f_m_aM        | 0/1;0/0;0/1         |                 |
| chr11 | 116790601 | 116790601 | G | A | APOA5   | exonic | nonsynonymous SNV | APOA5:NM_001166598:exon4:c.C628T:p.H210Y,APOA5:NM_052968:exon4:c.C628T:p.H210Y                                                                                                                                                                                                                                                                                                                                                                                                                                                                                                                                                                                                                                                                                                                                                                                                                                                                                   | 1.486 |          |          | Fam118_f_m_aM_aF_uM  | 0/0;0/1;0/1;0/0;0/0 |                 |
| chr11 | 117189361 | 117189361 | A | T | SIDT2   | exonic | nonsynonymous SNV | SIDT2:NM_001040455:exon15:c.A1379T:p.Y460F                                                                                                                                                                                                                                                                                                                                                                                                                                                                                                                                                                                                                                                                                                                                                                                                                                                                                                                       | 1.411 |          |          | Fam45_f_m_aM_uF      | 0/0;0/1;0/1;0/0     |                 |
| chr11 | 117518612 | 117518612 | C | T | DSCAML1 | exonic | nonsynonymous SNV | DSCAML1:NM_001367904:exon7:c.G1364A:p.R455H,DSCAML1:NM_001367905:exon7:c.G956A:p.R319H,DSCAML1:NM_020693:exon7:c.G1364A:p.R455H<br>DSCAML1:NM_001367904:exon3:c.A434G:p.K145R,DSCAML1:NM_001367905:exon3:c.A26G:p.K9R,DSCAML1:NM_020693:exon3:c.A434G:p.K145R                                                                                                                                                                                                                                                                                                                                                                                                                                                                                                                                                                                                                                                                                                    | 1.123 | 0.0003   | 0.0005   | 0.0002               | Fam45_f_m_aM_uF     | 0/1;0/0;0/1;0/0 |
| chr11 | 117776868 | 117776868 | T | C | DSCAML1 | exonic | nonsynonymous SNV | DSCAML1:NM_001367905:exon3:c.A26G:p.K9R,DSCAML1:NM_020693:exon3:c.A434G:p.K145R                                                                                                                                                                                                                                                                                                                                                                                                                                                                                                                                                                                                                                                                                                                                                                                                                                                                                  | 1.367 |          |          | Fam49_f_m_aM         | 0/0;0/1;0/1         |                 |
| chr11 | 118373576 | 118373576 | T | C | UBE4A   | exonic | nonsynonymous SNV | UBE4A:NM_001204077:exon8:c.T1007C:p.I336T,UBE4A:NM_004788:exon8:c.T1028C:p.I343T<br>KMT2A:NM_001197104:exon3:c.C991G:p.R331G,KMT2A:NM_005933:exon3:c.C991G:p.R331G                                                                                                                                                                                                                                                                                                                                                                                                                                                                                                                                                                                                                                                                                                                                                                                               | 1.068 |          | 0.0006   | 0.0001               | Fam40_f_m_aM_aM     | 0/0;0/1;0/0;0/1 |
| chr11 | 118472150 | 118472150 | C | G | KMT2A   | exonic | nonsynonymous SNV | KMT2A:NM_001197104:exon3:c.C991G:p.R331G,KMT2A:NM_005933:exon3:c.C991G:p.R331G                                                                                                                                                                                                                                                                                                                                                                                                                                                                                                                                                                                                                                                                                                                                                                                                                                                                                   | 2.108 | 0.0003   | 6.51E-05 | 2.10E-05             | Fam46_f_m_aM_uM     | 0/1;0/0;0/1;0/1 |
| chr11 | 119017482 | 119017482 | A | G | RPS25   | exonic | nonsynonymous SNV | RPS25:NM_001028:exon3:c.T163C:p.Y55H                                                                                                                                                                                                                                                                                                                                                                                                                                                                                                                                                                                                                                                                                                                                                                                                                                                                                                                             | 1.598 |          |          | Fam94_f_m_aM         | 0/1;0/0;0/1         |                 |
| chr11 | 119113637 | 119113637 | G | T | C2CD2L  | exonic | nonsynonymous SNV | C2CD2L:NM_001290474:exon11:c.G1414T:p.V472L,C2CD2L:NM_014807:exon11:c.G1414T:p.V472L                                                                                                                                                                                                                                                                                                                                                                                                                                                                                                                                                                                                                                                                                                                                                                                                                                                                             | 1.371 |          |          | Fam110_f_m_aM_aM_uMs | 0/1;0/0;0/0;0/1;0/1 |                 |
| chr11 | 119336177 | 119336177 | G | A | RNF26   | exonic | nonsynonymous SNV | RNF26:NM_032015:exon1:c.G1055A:p.G352D                                                                                                                                                                                                                                                                                                                                                                                                                                                                                                                                                                                                                                                                                                                                                                                                                                                                                                                           | 1.234 |          | 2.24E-05 | 6.98E-06             | Fam66_f_m_aM        | 0/0;0/1;0/1     |
| chr11 | 121045706 | 121045706 | G | A | TBCEL   | exonic | nonsynonymous SNV | TBCEL:NM_001130047:exon2:c.G16A:p.G6R,TBCEL:NM_0152715:exon2:c.G16A:p.G6R,TBCEL:NM_001363644:exon3:c.G16A:p.G6R                                                                                                                                                                                                                                                                                                                                                                                                                                                                                                                                                                                                                                                                                                                                                                                                                                                  | 1.946 |          |          | Fam116_f_m_aM_aF     | 0/0;0/1;0/0;0/1     |                 |
| chr11 | 121145969 | 121145969 | C | T | TECTA   | exonic | nonsynonymous SNV | TECTA:NM_005422:exon11:c.C3958T:p.P1320S                                                                                                                                                                                                                                                                                                                                                                                                                                                                                                                                                                                                                                                                                                                                                                                                                                                                                                                         | 1.074 | 7.35E-05 | 2.23E-05 | 6.98E-06             | Fam35_f_m_aF_uM     | 0/1;0/0;0/1;0/1 |
| chr11 | 121168904 | 121168904 | G | A | TECTA   | exonic | nonsynonymous SNV | TECTA:NM_005422:exon19:c.G5978A:p.R1993Q                                                                                                                                                                                                                                                                                                                                                                                                                                                                                                                                                                                                                                                                                                                                                                                                                                                                                                                         | 1.146 |          | 0.0002   | 2.10E-05             | Fam17_f_m_aM_uM     | 0/0;0/1;0/1;0/0 |
| chr11 | 121605150 | 121605150 | G | C | SORL1   | exonic | nonsynonymous SNV | SORL1:NM_003105:exon34:c.G4689C:p.W1563C<br>GRAMD1B:NM_001286564:exon18:c.G1795T:p.V599F,GRAMD1B:NM_001330396:exon18:c.G1783T:p.V595F,GRAMD1B:NM_001367418:exon18:c.G1984T:p.V662F,GRAMD1B:NM_020716:exon18:c.G1915T:p.V639F,GRAMD1B:NM_001286563:exon19:c.G1936T:p.V646F,GRAMD1B:NM_001367419:exon19:c.G1996T:p.V666F,GRAMD1B:NM_001367420:exon19:c.G1996T:p.V666F,GRAMD1B:NM_001367421:exon19:c.G2200T:p.V734F                                                                                                                                                                                                                                                                                                                                                                                                                                                                                                                                                 | 1.151 | 0.0003   | 0.0007   | 0.0003               | Fam56_f_m_aF_aM     | 0/1;0/0;0/1;0/1 |
| chr11 | 123618706 | 123618706 | G | T | GRAMD1B | exonic | nonsynonymous SNV | GRAMD1B:NM_001286564:exon18:c.G1795T:p.V599F,GRAMD1B:NM_001330396:exon18:c.G1783T:p.V595F,GRAMD1B:NM_001367418:exon18:c.G1984T:p.V662F,GRAMD1B:NM_020716:exon18:c.G1915T:p.V639F,GRAMD1B:NM_001286563:exon19:c.G1936T:p.V646F,GRAMD1B:NM_001367419:exon19:c.G1996T:p.V666F,GRAMD1B:NM_001367420:exon19:c.G1996T:p.V666F,GRAMD1B:NM_001367421:exon19:c.G2200T:p.V734F                                                                                                                                                                                                                                                                                                                                                                                                                                                                                                                                                                                             | 1.346 |          | 0.0004   | 4.89E-05             | Fam30_f_m_aM_uM     | 0/0;0/1;0/1;0/0 |
| chr11 | 124774775 | 124774775 | T | A | MSANTD2 | exonic | nonsynonymous SNV | MSANTD2:NM_001312920:exon1:c.A20T:p.E7V,MSANTD2:NM_001308027:exon2:c.A710T:p.E237V,MSANTD2:NM_001312921:exon2:c.A20T:p.E7V,MSANTD2:NM_024631:exon2:c.A554T:p.E185V,MSANTD2:NM_001352400:exon3:c.A20T:p.E7V,MSANTD2:NM_001352401:exon3:c.A20T:p.E7V                                                                                                                                                                                                                                                                                                                                                                                                                                                                                                                                                                                                                                                                                                               | 1.82  |          |          | Fam95_f_m_aM_aM_uF   | 0/1;0/0;0/1;0/1;0/0 |                 |
| chr11 | 124921191 | 124921191 | C | T | HEPACAM | exonic | nonsynonymous SNV | HEPACAM:NM_152722:exon7:c.G1198A:p.V400M                                                                                                                                                                                                                                                                                                                                                                                                                                                                                                                                                                                                                                                                                                                                                                                                                                                                                                                         | 2.801 | 0.0004   | 0.0005   | 0.0002               | Fam70_f_m_aM        | 0/0;0/1;0/1     |
| chr11 | 125397932 | 125397932 | A | C | PKNOX2  | exonic | nonsynonymous SNV | PKNOX2:NM_022062:exon7:c.A458C:p.E153A                                                                                                                                                                                                                                                                                                                                                                                                                                                                                                                                                                                                                                                                                                                                                                                                                                                                                                                           | 1.037 |          |          | Fam110_f_m_aM_aM_uMs | 0/1;0/0;0/1;0/0;0/0 |                 |
| chr11 | 125575315 | 125575315 | G | A | EI24    | exonic | nonsynonymous SNV | EI24:NM_001290135:exon3:c.G53A:p.R18Q,EI24:NM_004879:exon3:c.G95A:p.R32Q,EI24:NM_001330419:exon4:c.G95A:p.R32Q                                                                                                                                                                                                                                                                                                                                                                                                                                                                                                                                                                                                                                                                                                                                                                                                                                                   | 1.017 | 7.34E-05 | 0.0003   | 6.98E-06             | Fam74_f_m_aM_uM     | 0/1;0/0;0/1;0/0 |
| chr11 | 125606415 | 125606415 | T | C | STT3A   | exonic | nonsynonymous SNV | STT3A:NM_001278504:exon7:c.T454C:p.Y152H,STT3A:NM_152713:exon8:c.T730C:p.Y244H,STT3A:NM_001278503:exon9:c.T730C:p.Y244H                                                                                                                                                                                                                                                                                                                                                                                                                                                                                                                                                                                                                                                                                                                                                                                                                                          | 2.102 |          |          | Fam76_f_m_aM_uM      | 0/0;0/1;0/1;0/0     |                 |
| chr11 | 126414021 | 126414021 | G | C | ST3GAL4 | exonic | nonsynonymous SNV | ST3GAL4:NM_001254759:exon9:c.G973C:p.A325P,ST3GAL4:NM_001254757:exon11:c.G976C:p.A326P,ST3GAL4:NM_001254758:exon11:c.G976C:p.A326P,ST3GAL4:NM_001348398:exon11:c.G882C:p.E294D,ST3GAL4:NM_001348399:exon11:c.G976C:p.A326P,ST3GAL4:NM_001348400:exon11:c.G964C:p.A322P,ST3GAL4:NM_006278:exon11:c.G964C:p.A322P,ST3GAL4:NM_001348396:exon12:c.G1039C:p.A347P,ST3GAL4:NM_001348397:exon12:c.G1039C:p.A347P                                                                                                                                                                                                                                                                                                                                                                                                                                                                                                                                                        | 1.386 |          |          | Fam74_f_m_aM_uM      | 0/0;0/1;0/1;0/1     |                 |
| chr11 | 128480256 | 128480256 | C | T | ETS1    | exonic | nonsynonymous SNV | ETS1:NM_001162422:exon2:c.G278A:p.R93Q,ETS1:NM_005238:exon6:c.G926A:p.R309Q,ETS1:NM_001143820:exon8:c.G1058A:p.R353Q                                                                                                                                                                                                                                                                                                                                                                                                                                                                                                                                                                                                                                                                                                                                                                                                                                             | 1.228 |          | 1.40E-05 | Fam43_f_m_aM         | 0/0;0/1;0/1         |                 |

|       |           |           |   |   |         |        |                     |                                                                                                                                                                                                                                                                                                                                                                                                                                                                                                                                                                                                                                                                                                                                                                                                                                                                                                                                                                                                                        |       |        |          |          |                        |                         |
|-------|-----------|-----------|---|---|---------|--------|---------------------|------------------------------------------------------------------------------------------------------------------------------------------------------------------------------------------------------------------------------------------------------------------------------------------------------------------------------------------------------------------------------------------------------------------------------------------------------------------------------------------------------------------------------------------------------------------------------------------------------------------------------------------------------------------------------------------------------------------------------------------------------------------------------------------------------------------------------------------------------------------------------------------------------------------------------------------------------------------------------------------------------------------------|-------|--------|----------|----------|------------------------|-------------------------|
| chr11 | 128486122 | 128486122 | T | A | ETS1    | exonic | nonsynonymous SNV   | ETS1:NM_001330451:exon4:c.A428T;p.N143I;ETS1:NM_005238:exon4:c.A428T;p.N143I;ETS1:NM_001143820:exon6:c.A560T;p.N187I                                                                                                                                                                                                                                                                                                                                                                                                                                                                                                                                                                                                                                                                                                                                                                                                                                                                                                   | 1.073 | .      | .        | .        | Fam77_f_m_aM_aF_uM_uFs | 0/0;0/1;0/0;0/1;0/1;0/0 |
| chr11 | 128758299 | 128758299 | G | T | FLI1    | exonic | nonsynonymous SNV   | FLI1:NM_002017:exon2:c.G203T;p.R68L;FLI1:NM_001167681:exon3:c.G104T;p.R35L                                                                                                                                                                                                                                                                                                                                                                                                                                                                                                                                                                                                                                                                                                                                                                                                                                                                                                                                             | 1.02  | 0.0005 | 0.0005   | 0.0003   | Fam5_f_m_aM            | 0/1;0/0;0/1             |
| chr11 | 129914738 | 129914738 | T | C | PRDM10  | exonic | nonsynonymous SNV   | PRDM10:NM_001367898:exon13:c.A2549G;p.Q850R;PRDM10:NM_199439:exon13:c.A2549G;p.Q850R;PRDM10:NM_001367896:exon14:c.A1958G;p.Q653R;PRDM10:NM_001367899:exon14:c.A2561G;p.Q854R;PRDM10:NM_199438:exon14:c.A2561G;p.Q854R;PRDM10:NM_001367895:exon15:c.A1958G;p.Q653R;PRDM10:NM_001367897:exon15:c.A1970G;p.Q657R;PRDM10:NM_001367890:exon16:c.A2459G;p.Q820R;PRDM10:NM_001367891:exon16:c.A2474G;p.Q916R;PRDM10:NM_001367894:exon16:c.A2459G;p.Q820R;PRDM10:NM_199437:exon17:c.A2807G;p.Q936R;PRDM10:NM_001367892:exon18:c.A2753G;p.Q918R;PRDM10:NM_001367893:exon18:c.A2819G;p.Q940R;PRDM10:NM_020228:exon18:c.A2819G;p.Q940R                                                                                                                                                                                                                                                                                                                                                                                            | 1.283 | .      | .        | 6.98E-06 | Fam16_f_m_aM_aM        | 0/1;0/0;0/1;0/1         |
| chr11 | 133921108 | 133921108 | G | A | IGSF9B  | exonic | nonsynonymous SNV   | IGSF9B:NM_001277285:exon18:c.C2617T;p.R873C                                                                                                                                                                                                                                                                                                                                                                                                                                                                                                                                                                                                                                                                                                                                                                                                                                                                                                                                                                            | 2.045 | 0.0001 | 0.0002   | 0.0001   | Fam52_f_m_aM           | 0/1;0/0;0/1             |
| chr11 | 134383897 | 134383897 | C | T | B3GAT1  | exonic | nonsynonymous SNV   | B3GAT1:NM_054025:exon3:c.G404A;p.R135H;B3GAT1:NM_001367973:exon4:c.G443A;p.R148H;B3GAT1:NM_018644:exon4:c.G404A;p.R135H                                                                                                                                                                                                                                                                                                                                                                                                                                                                                                                                                                                                                                                                                                                                                                                                                                                                                                | 1.063 | .      | .        | 2.09E-05 | Fam95_f_m_aM_aM_uF     | 0/0;0/1;0/1;0/1;0/1     |
| chr12 | 157548    | 157548    | A | G | IQSEC3  | exonic | nonsynonymous SNV   | IQSEC3:NM_015232:exon6:c.A1388G;p.N463S;IQSEC3:NM_001170738:exon7:c.A2297G;p.N766S                                                                                                                                                                                                                                                                                                                                                                                                                                                                                                                                                                                                                                                                                                                                                                                                                                                                                                                                     | 1.048 | .      | 7.88E-05 | 6.98E-06 | Fam10_f_m_aM_uF        | 0/0;0/1;0/1;0/1         |
| chr12 | 1632849   | 1632849   | G | A | WNT5B   | exonic | nonsynonymous SNV   | WNT5B:NM_030775:exon3:c.G272A;p.R91Q;WNT5B:NM_032642:exon3:c.G272A;p.R91Q                                                                                                                                                                                                                                                                                                                                                                                                                                                                                                                                                                                                                                                                                                                                                                                                                                                                                                                                              | 1.372 | .      | .        | 1.40E-05 | Fam73_f_m_aF_dM        | 0/1;0/0;0/1;0/0         |
| chr12 | 1646037   | 1646037   | C | A | WNT5B   | exonic | nonsynonymous SNV   | WNT5B:NM_030775:exon5:c.C865A;p.L289M;WNT5B:NM_032642:exon5:c.C865A;p.L289M                                                                                                                                                                                                                                                                                                                                                                                                                                                                                                                                                                                                                                                                                                                                                                                                                                                                                                                                            | 1.13  | .      | 4.50E-05 | .        | Fam47_f_m_aM           | 0/1;0/0;0/1             |
| chr12 | 2493262   | 2493262   | C | T | CACNA1C | exonic | nonsynonymous SNV   | CACNA1C:NM_000719:exon7:c.C989T;p.T330M;CACNA1C:NM_001129827:exon7:c.C989T;p.T330M;CACNA1C:NM_001129829:exon7:c.C989T;p.T330M;CACNA1C:NM_001129830:exon7:c.C989T;p.T330M;CACNA1C:NM_001129831:exon7:c.C989T;p.T330M;CACNA1C:NM_001129832:exon7:c.C989T;p.T330M;CACNA1C:NM_001129833:exon7:c.C989T;p.T330M;CACNA1C:NM_001129834:exon7:c.C989T;p.T330M;CACNA1C:NM_001129835:exon7:c.C989T;p.T330M;CACNA1C:NM_001129836:exon7:c.C989T;p.T330M;CACNA1C:NM_001129837:exon7:c.C989T;p.T330M;CACNA1C:NM_001129838:exon7:c.C989T;p.T330M;CACNA1C:NM_001129839:exon7:c.C989T;p.T330M;CACNA1C:NM_001129840:exon7:c.C989T;p.T330M;CACNA1C:NM_001129841:exon7:c.C989T;p.T330M;CACNA1C:NM_001129842:exon7:c.C989T;p.T330M;CACNA1C:NM_001129843:exon7:c.C989T;p.T330M;CACNA1C:NM_001129844:exon7:c.C980T;p.T327M;CACNA1C:NM_001129846:exon7:c.C989T;p.T330M;CACNA1C:NM_001167623:exon7:c.C989T;p.T330M;CACNA1C:NM_001167624:exon7:c.C989T;p.T330M;CACNA1C:NM_001167625:exon7:c.C989T;p.T330M;CACNA1C:NM_199460:exon7:c.C989T;p.T330M | 2.088 | .      | 3.27E-05 | 2.09E-05 | Fam25_f_m_aM           | 0/0;0/1;0/1             |
| chr12 | 5045554   | 5045554   | C | A | KCNA5   | exonic | nonsynonymous SNV   | KCNA5:NM_002234:exon1:c.C1407A;p.D469E                                                                                                                                                                                                                                                                                                                                                                                                                                                                                                                                                                                                                                                                                                                                                                                                                                                                                                                                                                                 | 1.234 | .      | 1.12E-05 | .        | Fam67_f_m_aM_uF        | 0/1;0/0;0/1;0/1         |
| chr12 | 6375573   | 6375573   | C | - | LTBR    | exonic | frameshift deletion | LTBR:NM_001270987:exon1:c.18delC;p.S7Hfs*2                                                                                                                                                                                                                                                                                                                                                                                                                                                                                                                                                                                                                                                                                                                                                                                                                                                                                                                                                                             | 0.502 | .      | .        | .        | Fam1_f_m_aM            | 0/0;0/1;0/1             |
| chr12 | 6638287   | 6638287   | C | T | ACRBP   | exonic | nonsynonymous SNV   | ACRBP:NM_032489:exon10:c.G1627A;p.G543R                                                                                                                                                                                                                                                                                                                                                                                                                                                                                                                                                                                                                                                                                                                                                                                                                                                                                                                                                                                | 1.127 | 0.0003 | 4.48E-05 | 2.79E-05 | Fam45_f_m_aM_uF        | 0/1;0/0;0/1;0/0         |
| chr12 | 6748976   | 6748976   | G | A | MLF2    | exonic | nonsynonymous SNV   | MLF2:NM_005439:exon8:c.C566T;p.A189V                                                                                                                                                                                                                                                                                                                                                                                                                                                                                                                                                                                                                                                                                                                                                                                                                                                                                                                                                                                   | 2.346 | 0.0006 | 2.60E-05 | 6.98E-06 | Fam117_f_m_aM_aF       | 0/1;0/0;0/1;0/0         |
| chr12 | 6937516   | 6937516   | C | T | ATN1    | exonic | nonsynonymous SNV   | ATN1:NM_001007026:exon5:c.C2249T;p.P750L;ATN1:NM_001940:exon5:c.C2249T;p.P750L                                                                                                                                                                                                                                                                                                                                                                                                                                                                                                                                                                                                                                                                                                                                                                                                                                                                                                                                         | 1.887 | .      | .        | .        | Fam22_f_m_aF_aF_uF     | 0/0;0/1;0/1;0/1;0/0     |
| chr12 | 6937955   | 6937955   | A | G | ATN1    | exonic | nonsynonymous SNV   | ATN1:NM_001007026:exon6:c.A2405G;p.K802R;ATN1:NM_001940:exon6:c.A2405G;p.K802R                                                                                                                                                                                                                                                                                                                                                                                                                                                                                                                                                                                                                                                                                                                                                                                                                                                                                                                                         | 1.077 | .      | 1.64E-05 | .        | Fam13_f_m_aM           | 0/0;0/1;0/1             |
| chr12 | 6955457   | 6955457   | C | T | PTPN6   | exonic | nonsynonymous SNV   | PTPN6:NM_002831:exon6:c.C719T;p.A240V;PTPN6:NM_080548:exon6:c.C725T;p.A242V;PTPN6:NM_080549:exon6:c.C719T;p.A240V                                                                                                                                                                                                                                                                                                                                                                                                                                                                                                                                                                                                                                                                                                                                                                                                                                                                                                      | 1.211 | .      | 2.24E-05 | .        | Fam14_f_m_aM_aM        | 0/1;0/0;0/1;0/1         |
| chr12 | 8095673   | 8095673   | A | T | NECAP1  | exonic | nonsynonymous SNV   | NECAP1:NM_015509:exon7:c.A749T;p.D250V                                                                                                                                                                                                                                                                                                                                                                                                                                                                                                                                                                                                                                                                                                                                                                                                                                                                                                                                                                                 | 1.625 | .      | .        | 6.98E-06 | Fam12_f_m_aM_uM_aM     | 0/1;0/0;0/1;0/0;0/1     |
| chr12 | 8921649   | 8921649   | A | G | PHC1    | exonic | nonsynonymous SNV   | PHC1:NM_004426:exon5:c.A355G;p.S119G                                                                                                                                                                                                                                                                                                                                                                                                                                                                                                                                                                                                                                                                                                                                                                                                                                                                                                                                                                                   | 1.568 | .      | .        | .        | Fam21_f_m_aM_uM        | 0/0;0/1;0/1;0/1         |
| chr12 | 13611737  | 13611737  | C | T | GRIN2B  | exonic | nonsynonymous SNV   | GRIN2B:NM_000834:exon8:c.G1768A;p.A590T                                                                                                                                                                                                                                                                                                                                                                                                                                                                                                                                                                                                                                                                                                                                                                                                                                                                                                                                                                                | 1.596 | 0.0002 | 0.0003   | 6.28E-05 | Fam64_f_m_aM           | 0/0;0/1;0/1             |
| chr12 | 13866019  | 13866019  | C | T | GRIN2B  | exonic | nonsynonymous SNV   | GRIN2B:NM_000834:exon2:c.G190A;p.V64M                                                                                                                                                                                                                                                                                                                                                                                                                                                                                                                                                                                                                                                                                                                                                                                                                                                                                                                                                                                  | 1.2   | 0.0004 | 7.82E-05 | 0.0001   | Fam74_f_m_aM_uM        | 0/1;0/0;0/1;0/1         |
| chr12 | 19253987  | 19253987  | C | T | PLEKHA5 | exonic | nonsynonymous SNV   | PLEKHA5:NM_001143821:exon4:c.C275T;p.P92L;PLEKHA5:NM_001256470:exon4:c.C275T;p.P92L;PLEKHA5:NM_019012:exon4:c.C275T;p.P92L                                                                                                                                                                                                                                                                                                                                                                                                                                                                                                                                                                                                                                                                                                                                                                                                                                                                                             | 1.847 | .      | 3.38E-05 | 6.98E-06 | Fam32_f_m_aM_uM        | 0/1;0/0;0/1;0/1         |
| chr12 | 20680052  | 20680052  | A | C | PDE3A   | exonic | nonsynonymous SNV   | PDE3A:NM_001244683:exon15:c.A2241C;p.R747S;PDE3A:NM_000921:exon16:c.A3207C;p.R1069S                                                                                                                                                                                                                                                                                                                                                                                                                                                                                                                                                                                                                                                                                                                                                                                                                                                                                                                                    | 1.047 | .      | .        | .        | Fam52_f_m_aM           | 0/0;0/1;0/1             |
| chr12 | 21773354  | 21773354  | G | C | KCNJ8   | exonic | nonsynonymous SNV   | KCNJ8:NM_004982:exon2:c.C263G;p.A88G                                                                                                                                                                                                                                                                                                                                                                                                                                                                                                                                                                                                                                                                                                                                                                                                                                                                                                                                                                                   | 2.229 | 0.0004 | 0.0005   | 0.0002   | Fam83_f_m_aF           | 0/0;0/1;0/1             |
| chr12 | 26711246  | 26711246  | C | T | ITPR2   | exonic | nonsynonymous SNV   | ITPR2:NM_002223:exon9:c.G878A;p.R293H                                                                                                                                                                                                                                                                                                                                                                                                                                                                                                                                                                                                                                                                                                                                                                                                                                                                                                                                                                                  | 2.187 | .      | 6.47E-05 | 6.98E-06 | Fam46_f_m_aM_uM        | 0/0;0/1;0/1;0/0         |
| chr12 | 30639602  | 30639602  | A | G | IPO8    | exonic | nonsynonymous SNV   | IPO8:NM_001190995:exon17:c.T1787C;p.L596S;IPO8:NM_006390:exon21:c.T2402C;p.L801S                                                                                                                                                                                                                                                                                                                                                                                                                                                                                                                                                                                                                                                                                                                                                                                                                                                                                                                                       | 1.059 | .      | .        | .        | Fam55_f_m_aM_aM_dM     | 0/0;0/1;0/1;0/0;0/0     |
| chr12 | 30669222  | 30669222  | A | G | IPO8    | exonic | nonsynonymous SNV   | IPO8:NM_001190995:exon6:c.T490C;p.W164R;IPO8:NM_06390:exon10:c.T1105C;p.W369R                                                                                                                                                                                                                                                                                                                                                                                                                                                                                                                                                                                                                                                                                                                                                                                                                                                                                                                                          | 1.264 | .      | 0.0002   | .        | Fam39_f_m_aM           | 0/0;0/1;0/1             |

|       |          |          |   |   |         |          |                   |                                                                                                                                                                                                                                                                                                                                                                                                                                                                                                                                                                                                                                                                                                                                                                       |       |          |          |          |                      |                     |
|-------|----------|----------|---|---|---------|----------|-------------------|-----------------------------------------------------------------------------------------------------------------------------------------------------------------------------------------------------------------------------------------------------------------------------------------------------------------------------------------------------------------------------------------------------------------------------------------------------------------------------------------------------------------------------------------------------------------------------------------------------------------------------------------------------------------------------------------------------------------------------------------------------------------------|-------|----------|----------|----------|----------------------|---------------------|
| chr12 | 31387713 | 31387713 | C | A | DENND5B | exonic   | nonsynonymous SNV | DENND5B:NM_144973:exon21:c.G3715T;p.A1239S;DENND5B:NM_001308339:exon23:c.G3820T;p.A1274S<br>BICD1:NM_001003398:exon2:c.T313C;p.Y105H;BICD1:NM_001354186:exon2:c.T313C;p.Y105H;BICD1:NM_001354187:exon2:c.T313C;p.Y105H;BICD1:NM_001354188:exon2:c.T313C;p.Y105H;BICD1:NM_001354189:exon2:c.T313C;p.Y105H;BICD1:NM_001363603:exon2:c.T313C;p.Y105H;BICD1:NM_001714:exon2:c.T313C;p.Y105H                                                                                                                                                                                                                                                                                                                                                                               | 1.192 | 0.0003   | 7.70E-05 | 3.49E-05 | Fam115_f_m_aF_aM_aF  | 0/0;0/1;0/0;0/1;0/0 |
| chr12 | 32216346 | 32216346 | T | C | BICD1   | exonic   | nonsynonymous SNV | BICD1:NM_001003398:exon5:c.C1108T;p.R370W;BICD1:NM_001354186:exon5:c.C1108T;p.R370W;BICD1:NM_001354187:exon5:c.C1108T;p.R370W;BICD1:NM_001354188:exon5:c.C1108T;p.R370W;BICD1:NM_001354189:exon5:c.C1108T;p.R370W;BICD1:NM_001714:exon5:c.C1108T;p.R370W                                                                                                                                                                                                                                                                                                                                                                                                                                                                                                              | 1.454 |          | 5.58E-05 | 6.98E-06 | Fam99_f_m_aM_aM      | 0/1;0/0;0/1;0/1     |
| chr12 | 32327563 | 32327563 | C | T | BICD1   | exonic   | nonsynonymous SNV | BICD1:NM_001003398:exon5:c.C1108T;p.R370W;BICD1:NM_001354186:exon5:c.C1108T;p.R370W;BICD1:NM_001354187:exon5:c.C1108T;p.R370W;BICD1:NM_001354188:exon5:c.C1108T;p.R370W;BICD1:NM_001354189:exon5:c.C1108T;p.R370W;BICD1:NM_001714:exon5:c.C1108T;p.R370W                                                                                                                                                                                                                                                                                                                                                                                                                                                                                                              | 1.182 |          | 0.0003   | 6.98E-06 | Fam116_f_m_aM_aF     | 0/1;0/0;0/1;0/0     |
| chr12 | 39604902 | 39604902 | C | T | ABCD2   | exonic   | nonsynonymous SNV | ABCD2:NM_005164:exon4:c.G1265A;p.R422Q                                                                                                                                                                                                                                                                                                                                                                                                                                                                                                                                                                                                                                                                                                                                | 1.541 |          |          |          | Fam33_f_m_aM_uM      | 0/1;0/0;0/1;0/1     |
| chr12 | 39618808 | 39618808 | C | T | ABCD2   | exonic   | nonsynonymous SNV | ABCD2:NM_005164:exon1:c.G808A;p.V270M                                                                                                                                                                                                                                                                                                                                                                                                                                                                                                                                                                                                                                                                                                                                 | 1.225 |          |          |          | Fam110_f_m_aM_aM_uMs | 0/1;0/0;0/1;0/0;0/1 |
| chr12 | 41189035 | 41189035 | G | A | PDZRN4  | exonic   | nonsynonymous SNV | PDZRN4:NM_001164595:exon1:c.G580A;p.E194K                                                                                                                                                                                                                                                                                                                                                                                                                                                                                                                                                                                                                                                                                                                             | 1.001 | 7.40E-05 |          | 1.40E-05 | Fam42_f_m_aM_uF      | 0/1;0/0;0/1;0/0     |
| chr12 | 43799442 | 43799442 | G | C | TWF1    | exonic   | nonsynonymous SNV | TWF1:NM_001242397:exon5:c.C439G;p.L147V;TWF1:NM_002822:exon5:c.C439G;p.L147V                                                                                                                                                                                                                                                                                                                                                                                                                                                                                                                                                                                                                                                                                          | 1.107 | 0.0001   | 4.51E-05 | 6.99E-06 | Fam26_f_m_aM_uM      | 0/1;0/0;0/1;0/1     |
| chr12 | 45730067 | 45730067 | C | A | ARID2   | exonic   | nonsynonymous SNV | ARID2:NM_001347839:exon2:c.C116A;p.A39E;ARID2:NM_152641:exon2:c.C116A;p.A39E                                                                                                                                                                                                                                                                                                                                                                                                                                                                                                                                                                                                                                                                                          | 1.847 |          | 6.20E-05 | 3.49E-05 | Fam53_f_m_aM         | 0/0;0/1;0/1         |
| chr12 | 45836783 | 45836783 | C | A | ARID2   | exonic   | nonsynonymous SNV | ARID2:NM_001347839:exon8:c.C815A;p.P272Q;ARID2:NM_152641:exon8:c.C815A;p.P272Q                                                                                                                                                                                                                                                                                                                                                                                                                                                                                                                                                                                                                                                                                        | 2.19  |          |          |          | Fam46_f_m_aM_uM      | 0/0;0/1;0/1;0/0     |
| chr12 | 48071723 | 48071723 | T | C | SENP1   | splicing |                   | PFKM:NM_001166688:exon3:c.G185A;p.G62E;PFKM:NM_001354747:exon3:c.G35A;p.G12E;PFKM:NM_001354748:exon3:c.G35A;p.G12E;PFKM:NM_000289:exon4:c.G185A;p.G62E;PFKM:NM_001166687:exon4:c.G185A;p.G62E;PFKM:NM_001354740:exon4:c.G329A;p.G110E;PFKM:NM_001354742:exon4:c.G185A;p.G62E;PFKM:NM_001354743:exon4:c.G185A;p.G62E;PFKM:NM_001354744:exon4:c.G185A;p.G62E;PFKM:NM_001354746:exon4:c.G185A;p.G62E;PFKM:NM_001363619:exon4:c.G185A;p.G62E;PFKM:NM_001354741:exon5:c.G209A;p.G70E;PFKM:NM_001354745:exon5:c.G98A;p.G33E;PFKM:NM_001166686:exon6:c.G398A;p.G133E;PFKM:NM_001354737:exon6:c.G398A;p.G133E;PFKM:NM_001354738:exon6:c.G398A;p.G133E;PFKM:NM_001354739:exon6:c.G398A;p.G133E;PFKM:NM_001354735:exon7:c.G494A;p.G165E;PFKM:NM_001354736:exon7:c.G494A;p.G165E | 0.427 |          | 2.29E-05 | 6.98E-06 | Fam107_f_m_aM        | 0/1;0/0;0/1         |
| chr12 | 48131341 | 48131341 | G | A | PFKM    | exonic   | nonsynonymous SNV | PFKM:NM_001166688:exon3:c.G185A;p.G62E;PFKM:NM_001354747:exon3:c.G35A;p.G12E;PFKM:NM_001354748:exon3:c.G35A;p.G12E;PFKM:NM_000289:exon4:c.G185A;p.G62E;PFKM:NM_001166687:exon4:c.G185A;p.G62E;PFKM:NM_001354740:exon4:c.G329A;p.G110E;PFKM:NM_001354742:exon4:c.G185A;p.G62E;PFKM:NM_001354743:exon4:c.G185A;p.G62E;PFKM:NM_001354744:exon4:c.G185A;p.G62E;PFKM:NM_001354746:exon4:c.G185A;p.G62E;PFKM:NM_001363619:exon4:c.G185A;p.G62E;PFKM:NM_001354741:exon5:c.G209A;p.G70E;PFKM:NM_001354745:exon5:c.G98A;p.G33E;PFKM:NM_001166686:exon6:c.G398A;p.G133E;PFKM:NM_001354737:exon6:c.G398A;p.G133E;PFKM:NM_001354738:exon6:c.G398A;p.G133E;PFKM:NM_001354739:exon6:c.G398A;p.G133E;PFKM:NM_001354735:exon7:c.G494A;p.G165E;PFKM:NM_001354736:exon7:c.G494A;p.G165E | 1.605 |          | 1.12E-05 | 6.98E-06 | Fam117_f_m_aM_aF     | 0/0;0/1;0/1;0/1     |
| chr12 | 48716570 | 48716570 | A | G | CCNT1   | exonic   | nonsynonymous SNV | CCNT1:NM_001240:exon1:c.T106C;p.S36P;CCNT1:NM_001277842:exon1:c.T106C;p.S36P                                                                                                                                                                                                                                                                                                                                                                                                                                                                                                                                                                                                                                                                                          | 1.449 | 0.0003   | 0.0002   | 7.67E-05 | Fam26_f_m_aM_uM      | 0/0;0/1;0/1;0/1     |
| chr12 | 48771724 | 48771724 | C | T | ADCY6   | exonic   | nonsynonymous SNV | ADCY6:NM_015270:exon19:c.G3037A;p.A1013T                                                                                                                                                                                                                                                                                                                                                                                                                                                                                                                                                                                                                                                                                                                              | 1.152 | 0.0006   | 9.83E-05 | 6.98E-06 | Fam24_f_m_aM_aM      | 0/1;0/0;0/1;0/0     |
| chr12 | 48783221 | 48783221 | G | A | ADCY6   | exonic   | nonsynonymous SNV | ADCY6:NM_015270:exon2:c.C214T;p.R72W                                                                                                                                                                                                                                                                                                                                                                                                                                                                                                                                                                                                                                                                                                                                  | 1.05  | 0.0003   | 6.56E-05 | 2.09E-05 | Fam59_f_m_aF_uM      | 0/0;0/1;0/1;0/1     |
| chr12 | 49024934 | 49024934 | C | T | KMT2D   | exonic   | nonsynonymous SNV | KMT2D:NM_003482:exon49:c.G15797A;p.R5266H                                                                                                                                                                                                                                                                                                                                                                                                                                                                                                                                                                                                                                                                                                                             | 1.186 | 0.0007   | 0.0008   | 0.0005   | Fam10_f_m_aM_uF      | 0/0;0/1;0/1;0/1     |
| chr12 | 49048748 | 49048748 | G | A | KMT2D   | exonic   | nonsynonymous SNV | KMT2D:NM_003482:exon13:c.C4042T;p.P1348S                                                                                                                                                                                                                                                                                                                                                                                                                                                                                                                                                                                                                                                                                                                              | 2.458 |          |          |          | Fam84_f_m_aF         | 0/1;0/0;0/1         |
| chr12 | 49094349 | 49094349 | C | G | DHH     | exonic   | nonsynonymous SNV | DHH:NM_021044:exon1:c.G164C;p.R55P                                                                                                                                                                                                                                                                                                                                                                                                                                                                                                                                                                                                                                                                                                                                    | 2.081 |          |          |          | Fam18_f_m_aM_uF      | 0/1;0/0;0/1;0/0     |
| chr12 | 49094433 | 49094433 | C | T | DHH     | exonic   | nonsynonymous SNV | DHH:NM_021044:exon1:c.G80A;p.R27Q<br>LMBR1L:NM_001352162:exon4:c.C274T;p.R92W;LMBR1L:NM_001352163:exon5:c.C67T;p.R23W;LMBR1L:NM_001352164:exon5:c.C67T;p.R23W;LMBR1L:NM_001352166:exon5:c.C67T;p.R23W;LMBR1L:NM_001300751:exon6:c.C448T;p.R150W;LMBR1L:NM_001352161:exon6:c.C448T;p.R150W;LMBR1L:NM_001352165:exon6:c.C67T;p.R23W;LMBR1L:NM_018113:exon6:c.C448T;p.R150W;LMBR1L:NM_001300750:exon7:c.C433T;p.R145W                                                                                                                                                                                                                                                                                                                                                    | 1.845 |          | 0.0006   | 4.19E-05 | Fam65_f_m_aM_uF_dF   | 0/1;0/0;0/1;0/1;0/0 |
| chr12 | 49103801 | 49103801 | G | A | LMBR1L  | exonic   | nonsynonymous SNV | LMBR1L:NM_001352162:exon4:c.C274T;p.R92W;LMBR1L:NM_001352163:exon5:c.C67T;p.R23W;LMBR1L:NM_001352164:exon5:c.C67T;p.R23W;LMBR1L:NM_001352166:exon5:c.C67T;p.R23W;LMBR1L:NM_001300751:exon6:c.C448T;p.R150W;LMBR1L:NM_001352161:exon6:c.C448T;p.R150W;LMBR1L:NM_001352165:exon6:c.C67T;p.R23W;LMBR1L:NM_018113:exon6:c.C448T;p.R150W;LMBR1L:NM_001300750:exon7:c.C433T;p.R145W                                                                                                                                                                                                                                                                                                                                                                                         | 1.021 |          | 7.48E-05 |          | Fam39_f_m_aM         | 0/1;0/0;0/1         |
| chr12 | 49296985 | 49296985 | G | A | PRPH    | exonic   | nonsynonymous SNV | PRPH:NM_006262:exon4:c.G799A;p.D267N                                                                                                                                                                                                                                                                                                                                                                                                                                                                                                                                                                                                                                                                                                                                  | 1.487 | 0.0001   | 5.62E-05 | 4.19E-05 | Fam61_f_m_aM         | 0/0;0/1;0/1         |
| chr12 | 49543449 | 49543449 | C | T | KCNH3   | exonic   | nonsynonymous SNV | KCNH3:NM_001314030:exon5:c.C574T;p.R192W;KCNH3:NM_012284:exon5:c.C754T;p.R252W                                                                                                                                                                                                                                                                                                                                                                                                                                                                                                                                                                                                                                                                                        | 1.978 |          | 7.54E-05 | 2.09E-05 | Fam112_f_m_aM        | 0/0;0/1;0/1         |
| chr12 | 49550174 | 49550174 | G | A | KCNH3   | exonic   | nonsynonymous SNV | KCNH3:NM_001314030:exon10:c.G1583A;p.R528H;KCNH3:NM_012284:exon10:c.G1763A;p.R588H                                                                                                                                                                                                                                                                                                                                                                                                                                                                                                                                                                                                                                                                                    | 2.517 |          | 9.83E-05 | 2.09E-05 | Fam108_f_m_aM        | 0/0;0/1;0/1         |
| chr12 | 50737085 | 50737085 | C | T | DIP2B   | exonic   | nonsynonymous SNV | DIP2B:NM_173602:exon35:c.C4151T;p.P1384L                                                                                                                                                                                                                                                                                                                                                                                                                                                                                                                                                                                                                                                                                                                              | 1.576 |          | 9.81E-05 | 6.98E-06 | Fam121_f_m_aF_aM     | 0/1;0/0;0/0;0/1     |
| chr12 | 51109158 | 51109158 | T | G | TFCP2   | exonic   | nonsynonymous SNV | TFCP2:NM_001173452:exon6:c.A680C;p.H227P;TFCP2:NM_005653:exon6:c.A680C;p.H227P<br>SLC4A8:NM_001039960:exon16:c.C2150T;p.T717M;SLC4A8:NM_001258401:exon16:c.C1991T;p.T664M;SLC4A8:NM_001258403:exon16:c.C1991T;p.T664M                                                                                                                                                                                                                                                                                                                                                                                                                                                                                                                                                 | 2.003 |          |          |          | Fam88_f_m_aF         | 0/0;0/1;0/1         |
| chr12 | 51475184 | 51475184 | C | T | SLC4A8  | exonic   | nonsynonymous SNV | SLC4A8:NM_001039960:exon16:c.C2150T;p.T717M;SLC4A8:NM_001258401:exon16:c.C1991T;p.T664M;SLC4A8:NM_001258403:exon16:c.C1991T;p.T664M                                                                                                                                                                                                                                                                                                                                                                                                                                                                                                                                                                                                                                   | 1.724 |          |          | 1.40E-05 | Fam122_f_m_aM        | 0/0;0/1;0/1         |
| chr12 | 51920786 | 51920786 | C | T | ACVRL1  | exonic   | nonsynonymous SNV | ACVRL1:NM_001077401:exon9:c.C1405T;p.R469W;ACVRL1:NM_000020:exon10:c.C1405T;p.R469W<br>NR4A1:NM_173157:exon2:c.G187C;p.E63Q;NR4A1:NM_001202234:exon3:c.G349C;p.E117Q;NR4A1:NM_002135:exon3:c.G187C;p.E63Q                                                                                                                                                                                                                                                                                                                                                                                                                                                                                                                                                             | 1.359 | 7.35E-05 | 7.46E-05 | 2.09E-05 | Fam81_f_m_aM_uM      | 0/1;0/0;0/1;0/0     |
| chr12 | 52054515 | 52054515 | G | C | NR4A1   | exonic   | nonsynonymous SNV | NR4A1:NM_173157:exon2:c.G187C;p.E63Q;NR4A1:NM_001202234:exon3:c.G349C;p.E117Q;NR4A1:NM_002135:exon3:c.G187C;p.E63Q                                                                                                                                                                                                                                                                                                                                                                                                                                                                                                                                                                                                                                                    | 1.132 |          | 3.27E-05 |          | Fam70_f_m_aM         | 0/0;0/1;0/1         |
| chr12 | 52365134 | 52365134 | T | A | KRT85   | exonic   | nonsynonymous SNV | KRT85:NM_002283:exon2:c.A457T;p.T153S                                                                                                                                                                                                                                                                                                                                                                                                                                                                                                                                                                                                                                                                                                                                 | 1.028 |          |          |          | Fam15_f_m_aM_aM      | 0/1;0/0;0/0;0/1     |

|       |          |          |   |   |          |          |                     |                                                                                                                                                                                                                                                                                                                                                                                                                                                                                                                                                                                                                                                                                                                                                                                                                    |       |          |          |                 |                        |                         |                 |
|-------|----------|----------|---|---|----------|----------|---------------------|--------------------------------------------------------------------------------------------------------------------------------------------------------------------------------------------------------------------------------------------------------------------------------------------------------------------------------------------------------------------------------------------------------------------------------------------------------------------------------------------------------------------------------------------------------------------------------------------------------------------------------------------------------------------------------------------------------------------------------------------------------------------------------------------------------------------|-------|----------|----------|-----------------|------------------------|-------------------------|-----------------|
| chr12 | 52900649 | 52900649 | A | T | KRT8     | exonic   | nonsynonymous SNV   | KRT8:NM_002273:exon4:c.T629A;p.L210Q,KRT8:NM_001256282:exon5:c.T713A;p.L238Q,KRT8:NM_001256293:exon5:c.T629A;p.L210Q                                                                                                                                                                                                                                                                                                                                                                                                                                                                                                                                                                                                                                                                                               | 1.426 | 3.27E-05 |          | Fam15_f_m_aM_aM | 0/0/0/1;0/0/0/1        |                         |                 |
| chr12 | 53016553 | 53016553 | A | G | EIF4B    | exonic   | nonsynonymous SNV   | EIF4B:NM_001300821:exon2:c.A94G;p.T32A,EIF4B:NM_001330654:exon2:c.A94G;p.T32A,EIF4B:NM_001417:exon2:c.A94G;p.T32A                                                                                                                                                                                                                                                                                                                                                                                                                                                                                                                                                                                                                                                                                                  | 1.084 | 0.0002   | 0.0004   | 0.0004          | Fam91_m_aM_dM_aM_dM    | 0/0/0/1;0/0/0/0/0       |                 |
| chr12 | 53517183 | 53517183 | T | G | ATF7     | exonic   | nonsynonymous SNV   | ATF7:NM_001366561:exon11:c.A1241C;p.Q414P,ATF7:NM_001130060:exon12:c.A1343C;p.Q448P,ATF7:NM_001366555:exon12:c.A1439C;p.Q480P,ATF7:NM_001366556:exon12:c.A1406C;p.Q469P,ATF7:NM_001366558:exon12:c.A1406C;p.Q469P,ATF7:NM_006856:exon12:c.A1406C;p.Q469P                                                                                                                                                                                                                                                                                                                                                                                                                                                                                                                                                           | 1.309 |          | 9.81E-05 | 2.09E-05        | Fam77_f_m_aM_aF_uM_uFs | 0/1/0/0/0/1;0/1/0/1;0/0 |                 |
| chr12 | 54411882 | 54411882 | A | G | ITGA5    | exonic   | nonsynonymous SNV   | ITGA5:NM_002205:exon2:c.T301C;p.W101R                                                                                                                                                                                                                                                                                                                                                                                                                                                                                                                                                                                                                                                                                                                                                                              | 1.407 | 7.36E-05 | 7.11E-05 | 2.80E-05        | Fam12_f_m_aM_uM_aM     | 0/1/0/0/0/0/0/0/1       |                 |
| chr12 | 54419037 | 54419037 | C | - | ITGA5    | exonic   | frameshift deletion | ITGA5:NM_002205:exon1:c.162delG;p.P56Rfs*114                                                                                                                                                                                                                                                                                                                                                                                                                                                                                                                                                                                                                                                                                                                                                                       | 0.455 |          |          |                 | Fam53_f_m_aM           | 0/1/0/0/0/1             |                 |
| chr12 | 54575631 | 54575631 | A | G | PDE1B    | exonic   | nonsynonymous SNV   | PDE1B:NM_001315535:exon9:c.A654G;p.I218M,PDE1B:NM_001165975:exon11:c.A1206G;p.I402M,PDE1B:NM_001288769:exon11:c.A1143G;p.I381M,PDE1B:NM_001315534:exon11:c.A855G;p.I285M,PDE1B:NM_000924:exon12:c.A1266G;p.I422M,PDE1B:NM_001288768:exon12:c.A855G;p.I285M                                                                                                                                                                                                                                                                                                                                                                                                                                                                                                                                                         | 1.292 |          | 1.12E-05 | 1.40E-05        | Fam32_f_m_aM_uM        | 0/0/0/1;0/1/0/1         |                 |
| chr12 | 54582761 | 54582761 | T | G | PPP1R1A  | exonic   | nonsynonymous SNV   | PPP1R1A:NM_006741:exon4:c.A218C;p.K73T                                                                                                                                                                                                                                                                                                                                                                                                                                                                                                                                                                                                                                                                                                                                                                             | 1.127 |          |          |                 | Fam91_m_aM_dM_aM_dM    | 0/0/0/0/0/1;0/1/0/1     |                 |
| chr12 | 56169868 | 56169868 | T | C | SMARCC2  | exonic   | nonsynonymous SNV   | SMARCC2:NM_003075:exon23:c.A2363G;p.E788G,SMARCC2:NM_001130420:exon24:c.A2456G;p.E819G,SMARCC2:NM_001330288:exon24:c.A2456G;p.E819G,SMARCC2:NM_139067:exon24:c.A2456G;p.E819G                                                                                                                                                                                                                                                                                                                                                                                                                                                                                                                                                                                                                                      | 1.506 | 0.0003   | 0.0005   | 0.0002          | Fam90_f_m_aF_dM        | 0/0/0/1;0/1/0/1         |                 |
| chr12 | 56169904 | 56169904 | C | T | SMARCC2  | exonic   | nonsynonymous SNV   | SMARCC2:NM_001130420:exon24:c.G2420A;p.R807Q,SMARCC2:NM_001330288:exon24:c.G2420A;p.R807Q,SMARCC2:NM_139067:exon24:c.G2420A;p.R807Q                                                                                                                                                                                                                                                                                                                                                                                                                                                                                                                                                                                                                                                                                | 1.293 | 0.0006   | 7.45E-05 | 3.49E-05        | Fam95_f_m_aM_aM_uF     | 0/0/0/1;0/1/0/1;0/1     |                 |
| chr12 | 56214032 | 56214032 | T | C | RNF41    | exonic   | nonsynonymous SNV   | RNF41:NM_001242826:exon3:c.A16G;p.T6A,RNF41:NM_05785:exon3:c.A16G;p.T6A,RNF41:NM_194359:exon3:c.A16G;p.T6A                                                                                                                                                                                                                                                                                                                                                                                                                                                                                                                                                                                                                                                                                                         | 1.23  | 0.0004   | 0.0004   | 0.0002          | Fam98_f_m_aM           | 0/1/0/0/0/1             |                 |
| chr12 | 56245548 | 56245548 | C | T | ANKRD52  | exonic   | nonsynonymous SNV   | ANKRD52:NM_173595:exon21:c.G2233A;p.A745T                                                                                                                                                                                                                                                                                                                                                                                                                                                                                                                                                                                                                                                                                                                                                                          | 1.863 |          | 1.14E-05 |                 | Fam114_f_m_aM          | 0/1/0/0/0/1             |                 |
| chr12 | 56315157 | 56315157 | G | A | CNPY2    | exonic   | nonsynonymous SNV   | CNPY2:NM_001190991:exon2:c.C61T;p.R21W,CNPY2:NM_014255:exon2:c.C61T;p.R21W                                                                                                                                                                                                                                                                                                                                                                                                                                                                                                                                                                                                                                                                                                                                         | 1.256 |          | 2.23E-05 | 6.99E-06        | Fam56_f_m_aF_aM        | 0/0/0/1;0/1/0/1         |                 |
| chr12 | 57091718 | 57091718 | C | G | NAB2     | exonic   | nonsynonymous SNV   | NAB2:NM_001330305:exon2:c.C677G;p.A226G,NAB2:NM_005967:exon2:c.C677G;p.A226G                                                                                                                                                                                                                                                                                                                                                                                                                                                                                                                                                                                                                                                                                                                                       | 1.52  |          | 4.50E-05 | 6.98E-06        | Fam44_f_m_aM_uF        | 0/0/0/1;0/1/0/1         |                 |
| chr12 | 57254975 | 57254975 | C | A | R3HDM2   | exonic   | nonsynonymous SNV   | R3HDM2:NM_001351217:exon22:c.G2675T;p.G892V,R3HDM2:NM_001351213:exon23:c.G2777T;p.G926V,R3HDM2:NM_001351214:exon23:c.G2777T;p.G926V,R3HDM2:NM_01351215:exon23:c.G2777T;p.G926V,R3HDM2:NM_001351216:exon23:c.G2765T;p.G922V,R3HDM2:NM_001351218:exon23:c.G2675T;p.G892V,R3HDM2:NM_001330122:exon24:c.G2831T;p.G944V,R3HDM2:NM_001330123:exon24:c.G2699T;p.G900V,R3HDM2:NM_001351208:exon24:c.G2873T;p.G958V,R3HDM2:NM_001351209:exon24:c.G2825T;p.G942V,R3HDM2:NM_001351212:exon24:c.G2777T;p.G926V,R3HDM2:NM_014925:exon24:c.G2729T;p.G910V,R3HDM2:NM_001330121:exon25:c.G2831T;p.G944V,R3HDM2:NM_001351205:exon25:c.G2927T;p.G976V,R3HDM2:NM_01351206:exon25:c.G2927T;p.G976V,R3HDM2:NM_001351211:exon25:c.G2795T;p.G932V,R3HDM2:NM_001351204:exon26:c.G2927T;p.G976V,R3HDM2:NM_001351207:exon27:c.G2897T;p.G966V | 1.058 |          | 3.28E-05 |                 | Fam85_f_m_aM_aM        | 0/0/0/1;0/1/0/0         |                 |
| chr12 | 57575130 | 57575130 | G | A | KIF5A    | exonic   | nonsynonymous SNV   | KIF5A:NM_001354705:exon13:c.G1496A;p.R499Q,KIF5A:NM_004984:exon16:c.G1763A;p.R588Q                                                                                                                                                                                                                                                                                                                                                                                                                                                                                                                                                                                                                                                                                                                                 | 1.571 |          | 3.28E-05 |                 | Fam91_m_aM_dM_aM_dM    | 0/0/0/1;0/0/0/0/0/0     |                 |
| chr12 | 57730901 | 57730901 | A | G | AGAP2    | exonic   | nonsynonymous SNV   | AGAP2:NM_001122772:exon11:c.T2198C;p.V733A,AGAP2:NM_014770:exon11:c.T1190C;p.V397A                                                                                                                                                                                                                                                                                                                                                                                                                                                                                                                                                                                                                                                                                                                                 | 1.564 |          |          |                 | Fam116_f_m_aM_aF       | 0/1/0/0/0/0/1           |                 |
| chr12 | 57737484 | 57737484 | C | A | AGAP2    | exonic   | nonsynonymous SNV   | AGAP2:NM_001122772:exon11:c.G763T;p.G255W                                                                                                                                                                                                                                                                                                                                                                                                                                                                                                                                                                                                                                                                                                                                                                          | 1.542 | 7.35E-05 | 3.75E-05 | 3.49E-05        | Fam71_f_m_aF           | 0/1/0/0/0/1             |                 |
| chr12 | 61754898 | 61754898 | G | A | TAF2     | exonic   | nonsynonymous SNV   | TAF2:NM_178539:exon3:c.C233T;p.T78M                                                                                                                                                                                                                                                                                                                                                                                                                                                                                                                                                                                                                                                                                                                                                                                | 1.592 |          | 0.0008   | 3.49E-05        | Fam97_f_m_aM_aF        | 0/0/0/1;0/1/0/1         |                 |
| chr12 | 62302792 | 62302792 | G | A | USP15    | exonic   | nonsynonymous SNV   | USP15:NM_001252078:exon3:c.G220A;p.G74S,USP15:NM_001252079:exon3:c.G220A;p.G74S,USP15:NM_001351161:exon3:c.G220A;p.G74S,USP15:NM_006313:exon3:c.G220A;p.G74S                                                                                                                                                                                                                                                                                                                                                                                                                                                                                                                                                                                                                                                       | 1.054 |          |          | 6.99E-06        | Fam11_f_m_aM_uM        | 0/0/0/1;0/1/0/0         |                 |
| chr12 | 68856465 | 68856465 | A | T | CPM      | exonic   | nonsynonymous SNV   | CPM:NM_001005502:exon9:c.T1304A;p.V435E,CPM:NM_01874:exon9:c.T1304A;p.V435E,CPM:NM_198320:exon9:c.T1304A;p.V435E                                                                                                                                                                                                                                                                                                                                                                                                                                                                                                                                                                                                                                                                                                   | 1.133 |          |          | 6.98E-06        | Fam115_f_m_aF_aM_aF    | 0/0/0/1;0/1/0/0/0/1     |                 |
| chr12 | 70521494 | 70521494 | G | T | PTPRB    | exonic   | nonsynonymous SNV   | PTPRB:NM_001206971:exon31:c.C5719A;p.H1907N,PTPRB:NM_001206972:exon31:c.C5719A;p.H1907N,PTPRB:NM_02837:exon32:c.C5989A;p.H1997N,PTPRB:NM_001330204:exon33:c.C6379A;p.H2127N,PTPRB:NM_001109754:exon34:c.C6643A;p.H2215N                                                                                                                                                                                                                                                                                                                                                                                                                                                                                                                                                                                            | 1.308 |          | 0.0001   | 1.40E-05        | Fam36_f_m_aM_uM        | 0/1/0/0/0/1;0/0         |                 |
| chr12 | 72031568 | 72031568 | C | A | TPH2     | exonic   | nonsynonymous SNV   | TPH2:NM_173353:exon11:c.C1346A;p.P449H                                                                                                                                                                                                                                                                                                                                                                                                                                                                                                                                                                                                                                                                                                                                                                             | 1.158 | 7.34E-05 | 1.12E-05 |                 | Fam79_f_m_aM_uM        | 0/0/0/1;0/1/0/0         |                 |
| chr12 | 72473116 | 72473116 | A | T | TRHDE    | exonic   | nonsynonymous SNV   | TRHDE:NM_013381:exon5:c.A1385T;p.K462M                                                                                                                                                                                                                                                                                                                                                                                                                                                                                                                                                                                                                                                                                                                                                                             | 1.197 |          |          |                 | Fam119_f_m_aM_aM       | 0/1/0/0/0/0/0/1         |                 |
| chr12 | 76031432 | 76031432 | C | A | PHLDA1   | exonic   | nonsynonymous SNV   | PHLDA1:NM_007350:exon1:c.G310T;p.G104C                                                                                                                                                                                                                                                                                                                                                                                                                                                                                                                                                                                                                                                                                                                                                                             | 1.693 |          | 4.42E-05 | 6.98E-06        | Fam108_f_m_aM          | 0/1/0/0/0/1             |                 |
| chr12 | 76809823 | 76809823 | C | T | ZDHHC17  | exonic   | nonsynonymous SNV   | ZDHHC17:NM_001359626:exon5:c.C479T;p.T160I,ZDHHC17:NM_015336:exon5:c.C509T;p.T170I                                                                                                                                                                                                                                                                                                                                                                                                                                                                                                                                                                                                                                                                                                                                 | 1.26  | 7.35E-05 |          | 6.99E-06        | Fam38_f_m_aM           | 0/0/0/1;0/1             |                 |
| chr12 | 79806164 | 79806164 | A | G | PPP1R12A | splicing |                     |                                                                                                                                                                                                                                                                                                                                                                                                                                                                                                                                                                                                                                                                                                                                                                                                                    | 0.158 |          | 0.0003   | 0.0002          | 0.0001                 | Fam48_f_m_aM_uM         | 0/1/0/0/0/1;0/1 |



|       |           |           |    |   |         |        |                   |                                                                                                                                                                                                                                                                                                                                                                                                                                                              |       |  |          |          |                      |                     |                   |                   |
|-------|-----------|-----------|----|---|---------|--------|-------------------|--------------------------------------------------------------------------------------------------------------------------------------------------------------------------------------------------------------------------------------------------------------------------------------------------------------------------------------------------------------------------------------------------------------------------------------------------------------|-------|--|----------|----------|----------------------|---------------------|-------------------|-------------------|
| chr12 | 80708033  | 80708033  | G  | C | MYF6    | exonic | nonsynonymous SNV | MYF6:NM_002469:exon1:c.G314C;p.R105T                                                                                                                                                                                                                                                                                                                                                                                                                         | 1.408 |  |          | 6.98E-06 | Fam50_f_m_aF         | 0/0/0/1/0/1         |                   |                   |
| chr12 | 94149660  | 94149660  | G  | A | PLXNC1  | exonic | nonsynonymous SNV | PLXNC1:NM_005761:exon1:c.G689A;p.G230D                                                                                                                                                                                                                                                                                                                                                                                                                       | 1.799 |  |          |          | Fam87_f_m_aM_uM      | 0/1/0/0/1/0/1       |                   |                   |
| chr12 | 94581940  | 94581940  | G  | T | TMCC3   | exonic | nonsynonymous SNV | TMCC3:NM_001301036:exon2:c.C584A;p.S195Y, TMCC3:NM_020698:exon2:c.C677A;p.S226Y                                                                                                                                                                                                                                                                                                                                                                              | 1.04  |  |          |          | Fam60_f_m_aF         | 0/0/0/1/0/1         |                   |                   |
| chr12 | 94582210  | 94582210  | T  | C | TMCC3   | exonic | nonsynonymous SNV | TMCC3:NM_001301036:exon2:c.A314G;p.Y105C, TMCC3:NM_020698:exon2:c.A407G;p.Y136C                                                                                                                                                                                                                                                                                                                                                                              | 1.081 |  | 5.58E-05 | 6.98E-06 | Fam100_f_m_aF        | 0/0/0/1/0/1         |                   |                   |
| chr12 | 96018846  | 96018846  | A  | T | LTA4H   | exonic | nonsynonymous SNV | LTA4H:NM_000895:exon8:c.T769A;p.Y257N, LTA4H:NM_001256644:exon8:c.T697A;p.Y233N, LTA4H:NM_001256644:exon8:c.T697A;p.Y233N                                                                                                                                                                                                                                                                                                                                    | 1.199 |  |          | 6.98E-06 | Fam17_f_m_aM_uM      | 0/1/0/0/1/0/1       |                   |                   |
| chr12 | 98735585  | 98735586  | GT | - | ANKS1B  | exonic | stopgain          | ANKS1B:NM_001352216:exon9:c.514_515del;p.T172*, ANK S1B:NM_001204081:exon10:c.739_740del;p.T247*, ANKS1 B:NM_001352213:exon10:c.514_515del;p.T172*, ANKS1B: NM_001352214:exon10:c.514_515del;p.T172*, ANKS1B:NM_001352223:exon11:c.814_815del;p.T272*, ANKS1B:NM_020140:exon11:c.1219_1220del;p.T407*, ANKS1B:NM_001352197:exon12:c.1399_1400del;p.T467*, ANKS1B:NM_001352196:exon13:c.1471_1472del;p.T491*, ANKS1B:NM_152788:exon26:c.3721_3722del;p.T1241* | 0.582 |  | 0.0001   | 2.09E-05 | Fam62_f_m_aM_aM      | 0/0/0/1/0/0/1       |                   |                   |
| chr12 | 101110433 | 101110433 | G  | C | ANO4    | exonic | nonsynonymous SNV | ANO4:NM_001286616:exon22:c.G2179C;p.V727L, ANO4:NM_178826:exon22:c.G2074C;p.V692L, ANO4:NM_001286615:exon23:c.G2179C;p.V727L                                                                                                                                                                                                                                                                                                                                 | 1.457 |  |          |          | Fam113_f_m_aF_raM_uF | 0/0/0/0/0/1/0/0     |                   |                   |
| chr12 | 102958692 | 102958692 | G  | T | ASCL1   | exonic | nonsynonymous SNV | ASCL1:NM_004316:exon1:c.G448T;p.A150S                                                                                                                                                                                                                                                                                                                                                                                                                        | 1.007 |  |          | 6.98E-06 | Fam60_f_m_aF         | 0/1/0/0/0/1         |                   |                   |
| chr12 | 103943796 | 103943796 | G  | C | HSP90B1 | exonic | nonsynonymous SNV | HSP90B1:NM_003299:exon14:c.G1949C;p.S650T                                                                                                                                                                                                                                                                                                                                                                                                                    | 1.162 |  |          |          | Fam6_f_m_aM          | 0/1/0/0/0/1         |                   |                   |
| chr12 | 103946665 | 103946665 | C  | T | HSP90B1 | exonic | nonsynonymous SNV | HSP90B1:NM_003299:exon15:c.C2075T;p.P692L                                                                                                                                                                                                                                                                                                                                                                                                                    | 1.293 |  | 0.0003   | 0.0002   | Fam91_m_aM_dM_aM_dM  | 0/0/0/1/0/1/0/0/0/1 |                   |                   |
| chr12 | 103980906 | 103980906 | C  | T | TDG     | exonic | nonsynonymous SNV | TDG:NM_003211:exon4:c.C422T;p.P141L                                                                                                                                                                                                                                                                                                                                                                                                                          | 1.508 |  |          | 6.98E-06 | Fam106_f_m_aM        | 0/1/0/0/0/1         |                   |                   |
| chr12 | 104757034 | 104757034 | G  | A | CHST11  | exonic | nonsynonymous SNV | CHST11:NM_001173982:exon3:c.G275A;p.R92H, CHST11:NM_018413:exon3:c.G290A;p.R97H                                                                                                                                                                                                                                                                                                                                                                              | 1.847 |  | 0.0006   | 0.0002   | Fam28_f_m_aF_uF      | 0/0/0/1/0/1/0/1     |                   |                   |
| chr12 | 104757400 | 104757400 | G  | A | CHST11  | exonic | nonsynonymous SNV | CHST11:NM_001173982:exon3:c.G641A;p.R214H, CHST11:NM_018413:exon3:c.G656A;p.R219H                                                                                                                                                                                                                                                                                                                                                                            | 1.884 |  |          | 3.35E-05 | Fam97_f_m_aM_aF      | 0/1/0/0/1/0/0       |                   |                   |
| chr12 | 106066896 | 106066896 | C  | T | NUAK1   | exonic | nonsynonymous SNV | NUAK1:NM_014840:exon7:c.G1892A;p.R631Q                                                                                                                                                                                                                                                                                                                                                                                                                       | 1.411 |  | 0.0001   | 0.0001   | 0.0006               | Fam86_f_m_aF        | 0/0/0/1/0/1       |                   |
| chr12 | 107657647 | 107657647 | G  | T | BTBD11  | exonic | nonsynonymous SNV | BTBD11:NM_001017523:exon15:c.G1855T;p.D619Y, BTBD11:NM_001347943:exon15:c.G2887T;p.D963Y, BTBD11:NM_001347944:exon15:c.G1789T;p.D597Y, BTBD11:NM_001018072:exon17:c.G3244T;p.D1082Y                                                                                                                                                                                                                                                                          | 1.081 |  |          |          | Fam21_f_m_aM_uM      | 0/1/0/0/1/0/1       |                   |                   |
| chr12 | 108240370 | 108240370 | C  | T | WSCD2   | exonic | nonsynonymous SNV | WSCD2:NM_014653:exon8:c.C1171T;p.R391C, WSCD2:NM_001304447:exon9:c.C1171T;p.R391C                                                                                                                                                                                                                                                                                                                                                                            | 1.253 |  | 7.34E-05 | 3.27E-05 | 6.98E-06             | Fam89_f_m_aM        | 0/0/0/1/0/1       |                   |
| chr12 | 108538193 | 108538193 | A  | C | SART3   | exonic | nonsynonymous SNV | SART3:NM_014706:exon8:c.T1073G;p.L358R                                                                                                                                                                                                                                                                                                                                                                                                                       | 1.013 |  |          |          | Fam82_f_m_aM_uF      | 0/0/0/1/0/1/0/1     |                   |                   |
| chr12 | 109085066 | 109085066 | G  | A | USP30   | exonic | nonsynonymous SNV | USP30:NM_032663:exon12:c.G1282A;p.D428N, USP30:NM_001301175:exon15:c.G1189A;p.D397N                                                                                                                                                                                                                                                                                                                                                                          | 1.068 |  |          | 3.45E-05 | 1.40E-05             | Fam114_f_m_aM       | 0/1/0/0/0/1       |                   |
| chr12 | 109085786 | 109085786 | G  | A | USP30   | exonic | nonsynonymous SNV | USP30:NM_032663:exon13:c.G1409A;p.S470N, USP30:NM_001301175:exon16:c.G1316A;p.S439N                                                                                                                                                                                                                                                                                                                                                                          | 1.081 |  |          |          | Fam86_f_m_aF         | 0/0/0/1/0/1         |                   |                   |
| chr12 | 109180019 | 109180019 | C  | T | ACACB   | exonic | nonsynonymous SNV | ACACB:NM_001093:exon11:c.C1750T;p.R584C                                                                                                                                                                                                                                                                                                                                                                                                                      | 1.027 |  |          | 0.0001   | 2.79E-05             | Fam75_f_m_aM        | 0/0/0/1/0/1       |                   |
| chr12 | 109460713 | 109460713 | C  | G | KCTD10  | exonic | nonsynonymous SNV | KCTD10:NM_001317395:exon3:c.G310C;p.E104Q, KCTD10:NM_001317399:exon3:c.G310C;p.E104Q, KCTD10:NM_031954:exon3:c.G310C;p.E104Q                                                                                                                                                                                                                                                                                                                                 | 1.186 |  |          | 7.35E-05 | 0.0001               | 2.09E-05            | Fam5_f_m_aM       | 0/1/0/0/0/1       |
| chr12 | 109586086 | 109586086 | G  | A | MVK     | exonic | nonsynonymous SNV | MVK:NM_001301182:exon5:c.G436A;p.G146R, MVK:NM_00431:exon6:c.G592A;p.G198R, MVK:NM_001114185:exon6:c.G592A;p.G198R                                                                                                                                                                                                                                                                                                                                           | 1.249 |  |          | 6.54E-05 |                      | Fam30_f_m_aM_uM     | 0/1/0/0/1/0/0     |                   |
| chr12 | 110651307 | 110651307 | C  | T | HVCN1   | exonic | nonsynonymous SNV | HVCN1:NM_001256413:exon5:c.G493A;p.D165N, HVCN1:NM_001040107:exon6:c.G553A;p.D185N, HVCN1:NM_032369:exon6:c.G553A;p.D185N                                                                                                                                                                                                                                                                                                                                    | 1.472 |  |          | 7.35E-05 | 0.0002               | 3.49E-05            | Fam7_f_m_aM_aM_uM | 0/1/0/0/1/0/0/0/1 |
| chr12 | 111320353 | 111320353 | G  | A | CUX2    | exonic | nonsynonymous SNV | CUX2:NM_001370598:exon17:c.G2158A;p.A720T, CUX2:NM_015267:exon17:c.G2344A;p.A782T                                                                                                                                                                                                                                                                                                                                                                            | 1.614 |  |          | 7.36E-05 | 0.0008               | 6.98E-05            | Fam51_f_m_aM_uF   | 0/0/0/1/0/1/0/1   |
| chr12 | 111341911 | 111341911 | G  | A | CUX2    | exonic | nonsynonymous SNV | CUX2:NM_001370598:exon21:c.G3331A;p.V1111M, CUX2:NM_015267:exon21:c.G3517A;p.V1173M                                                                                                                                                                                                                                                                                                                                                                          | 1.691 |  |          |          | 6.98E-06             | Fam27_f_m_aF_uM_uM  | 0/1/0/0/1/0/0/0/1 |                   |
| chr12 | 111418609 | 111418609 | C  | T | SH2B3   | exonic | nonsynonymous SNV | SH2B3:NM_005475:exon2:c.C464T;p.P155L                                                                                                                                                                                                                                                                                                                                                                                                                        | 1.118 |  |          | 0.0004   | 0.0006               | 0.0003              | Fam20_f_m_aM_uF   | 0/1/0/0/1/0/0     |
| chr12 | 112265242 | 112265242 | C  | T | HECTD4  | exonic | nonsynonymous SNV | HECTD4:NM_001109662:exon16:c.G2552A;p.C851Y                                                                                                                                                                                                                                                                                                                                                                                                                  | 1.467 |  |          | 1.13E-05 |                      | Fam51_f_m_aM_uF     | 0/1/0/0/1/0/1     |                   |
| chr12 | 112279335 | 112279335 | T  | C | HECTD4  | exonic | nonsynonymous SNV | HECTD4:NM_001109662:exon9:c.A1580G;p.Y527C                                                                                                                                                                                                                                                                                                                                                                                                                   | 1.268 |  |          |          |                      | Fam85_f_m_aM_aM     | 0/0/0/1/0/0/0/1   |                   |
| chr12 | 112405899 | 112405899 | C  | T | RPL6    | exonic | nonsynonymous SNV | RPL6:NM_000970:exon6:c.G668A;p.R223Q, RPL6:NM_001024662:exon6:c.G668A;p.R223Q, RPL6:NM_001320137:exon6:c.G668A;p.R223Q, RPL6:NM_001320138:exon6:c.G668A;p.R223Q, RPL6:NM_001320139:exon6:c.G668A;p.R223Q, RPL6:NM_001320140:exon6:c.G668A;p.R223Q, RPL6:NM_001320142:exon6:c.G335A;p.R112Q, RPL6:NM_001320141:exon8:c.G668A;p.R223Q                                                                                                                          | 1.001 |  |          | 0.0004   | 0.0004               | 0.0003              | Fam2_f_m_aF       | 0/0/0/1/0/1       |
| chr12 | 112454594 | 112454594 | C  | T | PTPN11  | exonic | nonsynonymous SNV | PTPN11:NM_001330437:exon5:c.C556T;p.R186W, PTPN11:NM_002834:exon5:c.C556T;p.R186W, PTPN11:NM_080601:exon5:c.C556T;p.R186W                                                                                                                                                                                                                                                                                                                                    | 1.85  |  |          | 0.0002   | 2.79E-05             | Fam61_f_m_aM        | 0/1/0/0/0/1       |                   |
| chr12 | 113158957 | 113158957 | G  | A | DDX54   | exonic | nonsynonymous SNV | DDX54:NM_001111322:exon20:c.C2569T;p.R857C, DDX54:NM_024072:exon20:c.C2566T;p.R856C                                                                                                                                                                                                                                                                                                                                                                          | 1.07  |  |          | 6.91E-05 | 2.09E-05             | Fam114_f_m_aM       | 0/0/0/1/0/1       |                   |
| chr12 | 113180977 | 113180977 | G  | A | DDX54   | exonic | nonsynonymous SNV | DDX54:NM_001111322:exon2:c.C256T;p.R86C, DDX54:NM_024072:exon2:c.C256T;p.R86C                                                                                                                                                                                                                                                                                                                                                                                | 1.194 |  |          | 0.0002   | 4.89E-05             | Fam105_f_m_aM       | 0/1/0/0/0/1       |                   |
| chr12 | 114674352 | 114674352 | C  | G | TBX3    | exonic | nonsynonymous SNV | TBX3:NM_005996:exon6:c.G1523C;p.G508A, TBX3:NM_016569:exon7:c.G1583C;p.G528A                                                                                                                                                                                                                                                                                                                                                                                 | 1.2   |  |          |          |                      | Fam96_f_m_aM_uF     | 0/1/0/0/1/0/1     |                   |

|       |           |           |   |   |         |        |                   |                                                                                                                                                                                                                                                                                                                                                                                                                                                                                                                          |       |          |          |          |                        |                         |                 |
|-------|-----------|-----------|---|---|---------|--------|-------------------|--------------------------------------------------------------------------------------------------------------------------------------------------------------------------------------------------------------------------------------------------------------------------------------------------------------------------------------------------------------------------------------------------------------------------------------------------------------------------------------------------------------------------|-------|----------|----------|----------|------------------------|-------------------------|-----------------|
| chr12 | 117218154 | 117218154 | C | T | NOS1    | exonic | nonsynonymous SNV | NOS1:NM_001204213:exon27:c.G3173A:p.R1058Q,NOS1:NM_001204214:exon27:c.G3173A:p.R1058Q,NOS1:NM_00620:exon28:c.G4181A:p.R1394Q,NOS1:NM_001204218:exon29:c.G4283A:p.R1428Q                                                                                                                                                                                                                                                                                                                                                  | 1.618 | 0.0003   | 0.0004   | 0.0001   | Fam15_f_m_aM_aM        | 0/0;0/1;0/1;0/0         |                 |
| chr12 | 117247461 | 117247461 | C | G | NOS1    | exonic | nonsynonymous SNV | NOS1:NM_001204213:exon17:c.G1702C:p.V568L,NOS1:NM_001204214:exon17:c.G1702C:p.V568L,NOS1:NM_000620:exon18:c.G2710C:p.V904L,NOS1:NM_001204218:exon19:c.G2812C:p.V938L                                                                                                                                                                                                                                                                                                                                                     | 1.005 |          |          |          | Fam27_f_m_aF_uM_uM     | 0/1;0/0;0/1;0/0;0/1     |                 |
| chr12 | 118172615 | 118172615 | G | A | TAOK3   | exonic | nonsynonymous SNV | TAOK3:NM_001346494:exon4:c.C361T:p.R121W,TAOK3:NM_001346496:exon4:c.C361T:p.R121W,TAOK3:NM_001346495:exon5:c.C361T:p.R121W,TAOK3:NM_001346497:exon5:c.C361T:p.R121W,TAOK3:NM_001346487:exon17:c.C1768T:p.R590W,TAOK3:NM_001346489:exon17:c.C1741T:p.R581W,TAOK3:NM_016281:exon17:c.C1741T:p.R581W,TAOK3:NM_001346488:exon18:c.C1741T:p.R581W,TAOK3:NM_001346490:exon18:c.C1258T:p.R420W,TAOK3:NM_001346492:exon18:c.C1231T:p.R411W,TAOK3:NM_001346493:exon18:c.C1231T:p.R411W,TAOK3:NM_001346491:exon19:c.C1231T:p.R411W | 1.039 |          | 5.58E-05 | 2.79E-05 | Fam22_f_m_aF_aF_uF     | 0/0;0/1;0/1;0/1;0/1     |                 |
| chr12 | 118235611 | 118235611 | A | C | TAOK3   | exonic | nonsynonymous SNV | TAOK3:NM_001346487:exon8:c.T498G:p.F166L,TAOK3:NM_001346489:exon8:c.T498G:p.F166L,TAOK3:NM_016281:exon8:c.T498G:p.F166L,TAOK3:NM_001346488:exon9:c.T498G:p.F166L                                                                                                                                                                                                                                                                                                                                                         | 1.271 |          | 0.0003   | 0.0002   | Fam27_f_m_aF_uM_uM     | 0/0;0/1;0/1;0/0;0/0     |                 |
| chr12 | 118386143 | 118386143 | A | G | SUDS3   | exonic | nonsynonymous SNV | SUDS3:NM_022491:exon4:c.A298G:p.K100E                                                                                                                                                                                                                                                                                                                                                                                                                                                                                    | 1.179 |          |          |          | Fam120_f_m_aM_aM       | 0/1;0/0;0/1;0/0         |                 |
| chr12 | 119156605 | 119156605 | G | T | SRRM4   | exonic | nonsynonymous SNV | SRRM4:NM_194286:exon13:c.G1643T:p.S548I                                                                                                                                                                                                                                                                                                                                                                                                                                                                                  | 1.123 | 7.35E-05 | 3.58E-05 | 1.40E-05 | Fam110_f_m_aM_aM_uMs   | 0/1;0/0;0/1;0/1;0/1     |                 |
| chr12 | 119697827 | 119697827 | C | T | CIT     | exonic | nonsynonymous SNV | CIT:NM_007174:exon45:c.G5588A:p.R1863Q,CIT:NM_001206999:exon46:c.G5714A:p.R1905Q                                                                                                                                                                                                                                                                                                                                                                                                                                         | 1.569 | 7.34E-05 | 3.27E-05 |          | Fam9_f_m_aM_dM_uF      | 0/0;0/1;0/1;0/0;0/1     |                 |
| chr12 | 119752172 | 119752172 | G | C | CIT     | exonic | nonsynonymous SNV | CIT:NM_007174:exon22:c.C2656G:p.R886G,CIT:NM_001206999:exon23:c.C2782G:p.R928G                                                                                                                                                                                                                                                                                                                                                                                                                                           | 1.747 |          |          |          | Fam48_f_m_aM_uM        | 0/0;0/1;0/1;0/1         |                 |
| chr12 | 120151180 | 120151180 | G | A | GCN1    | exonic | nonsynonymous SNV | GCN1:NM_006836:exon34:c.C4274T:p.A1425V                                                                                                                                                                                                                                                                                                                                                                                                                                                                                  | 1.609 |          |          | 6.98E-06 | Fam119_f_m_aM_aM       | 0/0;0/1;0/1;0/0         |                 |
| chr12 | 120364731 | 120364731 | G | A | MSI1    | exonic | nonsynonymous SNV | MSI1:NM_002442:exon5:c.C292T:p.R98W                                                                                                                                                                                                                                                                                                                                                                                                                                                                                      | 2.037 |          |          |          | Fam12_f_m_aM_uM_aM     | 0/1;0/0;0/0;0/1;0/1     |                 |
| chr12 | 120462116 | 120462116 | T | C | SRSF9   | exonic | nonsynonymous SNV | SRSF9:NM_003769:exon4:c.A569G:p.Y190C                                                                                                                                                                                                                                                                                                                                                                                                                                                                                    | 2.244 |          |          |          | 0                      | Fam119_f_m_aM_aM        | 0/0;0/1;0/0;0/1 |
| chr12 | 120579825 | 120579825 | C | T | POP5    | exonic | nonsynonymous SNV | POP5:NM_015918:exon3:c.G262A:p.E88K                                                                                                                                                                                                                                                                                                                                                                                                                                                                                      | 1.348 | 0.0005   | 0.0004   | 0.0002   | Fam82_f_m_aM_uF        | 0/0;0/1;0/1;0/1         |                 |
| chr12 | 120710481 | 120710481 | G | T | UNC119B | exonic | nonsynonymous SNV | UNC119B:NM_001080533:exon1:c.G7T:p.G3W                                                                                                                                                                                                                                                                                                                                                                                                                                                                                   | 1.661 | 0.0001   |          | 4.19E-05 | Fam123_f_aF            | 0/0;0/1                 |                 |
| chr12 | 121245171 | 121245171 | G | A | CAMKK2  | exonic | nonsynonymous SNV | CAMKK2:NM_001270486:exon14:c.C1522T:p.R508C,CAMKK2:NM_153500:exon14:c.C1393T:p.R465C,CAMKK2:NM_172215:exon14:c.C1393T:p.R465C,CAMKK2:NM_172216:exon14:c.C1393T:p.R465C,CAMKK2:NM_001270485:exon15:c.C1522T:p.R508C,CAMKK2:NM_006549:exon15:c.C1522T:p.R508C,CAMKK2:NM_153499:exon15:c.C1522T:p.R508C,CAMKK2:NM_172214:exon15:c.C1522T:p.R508C,CAMKK2:NM_172226:exon15:c.C1522T:p.R508C                                                                                                                                   | 1.209 |          | 0.0008   | 8.37E-05 | Fam90_f_m_aF_dM        | 0/1;0/0;0/1;0/0         |                 |
| chr12 | 121808279 | 121808279 | G | C | SETD1B  | exonic | nonsynonymous SNV | SETD1B:NM_001353345:exon4:c.G616C:p.E206Q                                                                                                                                                                                                                                                                                                                                                                                                                                                                                | 2.317 |          | 2.04E-05 | 7.01E-06 | Fam31_f_m_aM_uF        | 0/0;0/1;0/1;0/0         |                 |
| chr12 | 121808279 | 121808279 | G | C | SETD1B  | exonic | nonsynonymous SNV | SETD1B:NM_001353345:exon4:c.G616C:p.E206Q                                                                                                                                                                                                                                                                                                                                                                                                                                                                                | 2.317 |          | 2.04E-05 | 7.01E-06 | Fam57_f_m_aM_uF        | 0/0;0/1;0/1;0/1         |                 |
| chr12 | 121817895 | 121817895 | T | C | SETD1B  | exonic | nonsynonymous SNV | SETD1B:NM_001353345:exon9:c.T3409C:p.S1137P                                                                                                                                                                                                                                                                                                                                                                                                                                                                              | 1.623 |          |          |          | Fam1_f_m_aM            | 0/1;0/0;0/1             |                 |
| chr12 | 121823438 | 121823438 | C | T | SETD1B  | exonic | nonsynonymous SNV | SETD1B:NM_001353345:exon11:c.C4859T:p.P1620L                                                                                                                                                                                                                                                                                                                                                                                                                                                                             | 1.355 | 0.0001   | 0.0003   | 9.82E-05 | Fam17_f_m_aM_uM        | 0/1;0/0;0/1;0/1         |                 |
| chr12 | 121825349 | 121825349 | C | A | SETD1B  | exonic | nonsynonymous SNV | SETD1B:NM_001353345:exon12:c.C5320A:p.P1774T                                                                                                                                                                                                                                                                                                                                                                                                                                                                             | 1.464 |          | 4.85E-05 | 6.98E-06 | Fam121_f_m_aF_aM       | 0/1;0/0;0/1;0/1         |                 |
| chr12 | 122354478 | 122354478 | G | C | CLIP1   | exonic | nonsynonymous SNV | CLIP1:NM_001247997:exon7:c.C1282G:p.L428V,CLIP1:NM_002956:exon7:c.C1282G:p.L428V,CLIP1:NM_198240:exon7:c.C1282G:p.L428V                                                                                                                                                                                                                                                                                                                                                                                                  | 1.241 |          |          | 6.98E-06 | Fam9_f_m_aM_dM_uF      | 0/1;0/0;0/1;0/0;0/1     |                 |
| chr12 | 122987336 | 122987336 | C | T | PITPNM2 | exonic | nonsynonymous SNV | PITPNM2:NM_001300801:exon22:c.G3340A:p.V1114M,PITPNM2:NM_020845:exon22:c.G3358A:p.V1120M                                                                                                                                                                                                                                                                                                                                                                                                                                 | 2.152 | 0.0001   | 0.0002   | 0.0001   | Fam85_f_m_aM_aM        | 0/1;0/0;0/1;0/0         |                 |
| chr12 | 122994873 | 122994873 | C | T | PITPNM2 | exonic | nonsynonymous SNV | PITPNM2:NM_001300801:exon14:c.G2161A:p.D721N,PITPNM2:NM_020845:exon14:c.G2161A:p.D721N                                                                                                                                                                                                                                                                                                                                                                                                                                   | 1.456 | 0.0001   | 0.0003   | 4.19E-05 | Fam92_f_m_aM_raM       | 0/0;0/1;0/1;0/0         |                 |
| chr12 | 123465695 | 123465695 | C | T | SNRNP35 | exonic | nonsynonymous SNV | SNRNP35:NM_022717:exon2:c.C155T:p.T57I,SNRNP35:NM_180699:exon2:c.C170T:p.T57I                                                                                                                                                                                                                                                                                                                                                                                                                                            | 1.187 |          | 0.0002   | 1.40E-05 | Fam97_f_m_aM_aF        | 0/0;0/1;0/1;0/0         |                 |
| chr12 | 124012603 | 124012603 | G | T | ZNF664  | exonic | nonsynonymous SNV | ZNF664:NM_001204298:exon5:c.G459T:p.R153S,ZNF664:NM_152437:exon5:c.G459T:p.R153S                                                                                                                                                                                                                                                                                                                                                                                                                                         | 1.08  |          |          |          | Fam22_f_m_aF_aF_uF     | 0/0;0/1;0/0;0/1;0/1     |                 |
| chr12 | 130346489 | 130346489 | C | T | PIWIL1  | exonic | nonsynonymous SNV | PIWIL1:NM_001190971:exon5:c.C436T:p.R146C,PIWIL1:NM_004764:exon5:c.C436T:p.R146C                                                                                                                                                                                                                                                                                                                                                                                                                                         | 1.851 |          | 1.12E-05 | 6.98E-06 | Fam21_f_m_aM_uM        | 0/0;0/1;0/1;0/1         |                 |
| chr12 | 131711370 | 131711370 | C | G | SFSWAP  | exonic | nonsynonymous SNV | SFSWAP:NM_001261411:exon1:c.C141G:p.D47E,SFSWAP:NM_004592:exon1:c.C141G:p.D47E                                                                                                                                                                                                                                                                                                                                                                                                                                           | 1.847 |          |          |          | Fam115_f_m_aF_aM_aF    | 0/1;0/0;0/0;0/1;0/1     |                 |
| chr12 | 131714878 | 131714878 | G | A | SFSWAP  | exonic | nonsynonymous SNV | SFSWAP:NM_001261411:exon3:c.G445A:p.V149M,SFSWAP:NM_004592:exon3:c.G445A:p.V149M                                                                                                                                                                                                                                                                                                                                                                                                                                         | 1.836 | 7.34E-05 | 0.0002   | 4.19E-05 | Fam103_f_m_aM          | 0/1;0/0;0/1             |                 |
| chr12 | 131753245 | 131753245 | G | A | SFSWAP  | exonic | nonsynonymous SNV | SFSWAP:NM_001261411:exon8:c.G1204A:p.V402M,SFSWAP:NM_004592:exon8:c.G1204A:p.V402M                                                                                                                                                                                                                                                                                                                                                                                                                                       | 1.293 |          | 9.83E-05 | 5.58E-05 | Fam45_f_m_aM_uF        | 0/1;0/0;0/1;0/1         |                 |
| chr12 | 132657389 | 132657389 | G | C | POLE    | exonic | nonsynonymous SNV | POLE:NM_006231:exon28:c.C3419G:p.A1140G                                                                                                                                                                                                                                                                                                                                                                                                                                                                                  | 1.572 |          |          |          | Fam2_f_m_aF            | 0/1;0/0;0/1             |                 |
| chr12 | 132661621 | 132661621 | G | A | POLE    | exonic | nonsynonymous SNV | POLE:NM_006231:exon24:c.C2770T:p.R924C                                                                                                                                                                                                                                                                                                                                                                                                                                                                                   | 1.805 | 0.0003   | 6.17E-05 | 3.49E-05 | Fam77_f_m_aM_aF_uM_uFs | 0/1;0/0;0/0;0/1;0/1;0/0 |                 |
| chr13 | 19179518  | 19179518  | C | T | TUBA3C  | exonic | nonsynonymous SNV | TUBA3C:NM_006001:exon2:c.G49A:p.G17S                                                                                                                                                                                                                                                                                                                                                                                                                                                                                     | 1.594 | 7.35E-05 | 0.0001   | 5.58E-05 | Fam5_f_m_aM            | 0/1;0/0;0/1             |                 |
| chr13 | 20979722  | 20979722  | A | G | LATS2   | exonic | nonsynonymous SNV | LATS2:NM_014572:exon7:c.T2741C:p.L914S                                                                                                                                                                                                                                                                                                                                                                                                                                                                                   | 1.851 |          |          |          | Fam105_f_m_aM          | 0/0;0/1;0/1             |                 |

|       |          |          |   |   |          |        |                   |                                                                                                                                                                                                                                                                                                                                                                                                                                                                                                                                 |       |          |          |          |                        |                         |             |
|-------|----------|----------|---|---|----------|--------|-------------------|---------------------------------------------------------------------------------------------------------------------------------------------------------------------------------------------------------------------------------------------------------------------------------------------------------------------------------------------------------------------------------------------------------------------------------------------------------------------------------------------------------------------------------|-------|----------|----------|----------|------------------------|-------------------------|-------------|
| chr13 | 24286296 | 24286296 | C | A | SPATA13  | exonic | nonsynonymous SNV | SPATA13:NM_001286793:exon3:c.C275A:p.A92D,SPATA13:NM_001286795:exon3:c.C275A:p.A92D,SPATA13:NM_001286794:exon4:c.C341A:p.A114D,SPATA13:NM_153023:exon5:c.C509A:p.A170D,SPATA13:NM_001166271:exon6:c.C2384A:p.A795D,SPATA13:NM_001286792:exon8:c.C2570A:p.A857D                                                                                                                                                                                                                                                                  | 1.247 |          |          |          |                        | Fam38_f_m_aM            | 0/1;0/0;0/1 |
| chr13 | 24297502 | 24297502 | G | A | SPATA13  | exonic | nonsynonymous SNV | SPATA13:NM_001286793:exon7:c.G1055A:p.R352H,SPATA13:NM_001286795:exon8:c.G1241A:p.R414H,SPATA13:NM_001286794:exon9:c.G1307A:p.R436H,SPATA13:NM_153023:exon10:c.G1475A:p.R492H,SPATA13:NM_001166271:exon11:c.G3350A:p.R1117H,SPATA13:NM_001286792:exon13:c.G3536A:p.R1179H                                                                                                                                                                                                                                                       | 1.098 | 0.0004   | 0.0005   | 0.0003   | Fam9_f_m_aM_dM_uF      | 0/1;0/0;0/1;0/0;0/1     |             |
| chr13 | 26759091 | 26759091 | G | A | GPR12    | exonic | nonsynonymous SNV | GPR12:NM_005288:exon2:c.C737T:p.T246I                                                                                                                                                                                                                                                                                                                                                                                                                                                                                           | 1.929 |          |          |          | Fam61_f_m_aM           | 0/1;0/0;0/1             |             |
| chr13 | 28138761 | 28138761 | G | T | PAN3     | exonic | nonsynonymous SNV | PAN3:NM_175854:exon1:c.G1047:p.G35V                                                                                                                                                                                                                                                                                                                                                                                                                                                                                             | 2.095 |          | 0.0002   | 1.42E-05 | Fam117_f_m_aM_aF       | 0/0;0/1;0/0;0/1         |             |
| chr13 | 28272064 | 28272064 | A | G | PAN3     | exonic | nonsynonymous SNV | PAN3:NM_175854:exon14:c.A2042G:p.Q681R                                                                                                                                                                                                                                                                                                                                                                                                                                                                                          | 1.795 |          |          | 6.98E-06 | Fam116_f_m_aM_aF       | 0/0;0/1;0/0;0/1         |             |
| chr13 | 28277252 | 28277252 | T | C | PAN3     | exonic | nonsynonymous SNV | PAN3:NM_175854:exon15:c.T2065C:p.S689P                                                                                                                                                                                                                                                                                                                                                                                                                                                                                          | 2.032 |          |          |          | Fam37_f_m_aF_uM        | 0/1;0/0;0/1;0/0         |             |
| chr13 | 28427880 | 28427880 | T | C | FLT1     | exonic | nonsynonymous SNV | FLT1:NM_001159920:exon9:c.A1148G:p.Y383C,FLT1:NM_011600330:exon9:c.A1148G:p.Y383C,FLT1:NM_001160031:exon9:c.A1148G:p.Y383C,FLT1:NM_002019:exon9:c.A1148G:p.Y383C                                                                                                                                                                                                                                                                                                                                                                | 1.078 |          | 5.59E-05 | 3.49E-05 | Fam90_f_m_aF_dM        | 0/0;0/1;0/1;0/1         |             |
| chr13 | 29536121 | 29536121 | C | T | SLC7A1   | exonic | nonsynonymous SNV | SLC7A1:NM_003045:exon3:c.G68A:p.R23Q                                                                                                                                                                                                                                                                                                                                                                                                                                                                                            | 1.016 | 7.35E-05 | 9.80E-05 | 2.09E-05 | Fam24_f_m_aM_aM        | 0/1;0/0;0/0;0/1         |             |
| chr13 | 29772186 | 29772186 | T | C | UBL3     | exonic | nonsynonymous SNV | UBL3:NM_007106:exon3:c.A149G:p.E50G                                                                                                                                                                                                                                                                                                                                                                                                                                                                                             | 1.692 |          |          |          | Fam13_f_m_aM           | 0/1;0/0;0/1             |             |
| chr13 | 31150046 | 31150046 | C | G | HSPH1    | exonic | nonsynonymous SNV | HSPH1:NM_001286505:exon6:c.G817C:p.A273P,HSPH1:NM_001286503:exon8:c.G1045C:p.A349P,HSPH1:NM_001286504:exon8:c.G1051C:p.A351P,HSPH1:NM_001349704:exon8:c.G1045C:p.A349P,HSPH1:NM_006644:exon8:c.G1045C:p.A349P                                                                                                                                                                                                                                                                                                                   | 1.409 |          |          |          | Fam87_f_m_aM_uM        | 0/1;0/0;0/1;0/1         |             |
| chr13 | 32185125 | 32185125 | C | T | FRY      | exonic | nonsynonymous SNV | FRY:NM_023037:exon26:c.C3296T:p.A1099V                                                                                                                                                                                                                                                                                                                                                                                                                                                                                          | 1.2   |          |          | 1.40E-05 | Fam88_f_m_aF           | 0/1;0/0;0/1             |             |
| chr13 | 33017246 | 33017246 | A | G | KL       | exonic | nonsynonymous SNV | KL:NM_004795:exon1:c.A806G:p.H269R                                                                                                                                                                                                                                                                                                                                                                                                                                                                                              | 2.298 |          |          | 6.98E-06 | Fam36_f_m_aM_uM        | 0/0;0/1;0/1;0/1         |             |
| chr13 | 36126085 | 36126085 | G | A | DCLK1    | exonic | nonsynonymous SNV | DCLK1:NM_001330071:exon2:c.C53T:p.A18V,DCLK1:NM_004734:exon2:c.C53T:p.A18V                                                                                                                                                                                                                                                                                                                                                                                                                                                      | 1.212 |          | 1.12E-05 |          | Fam40_f_m_aM_aM        | 0/1;0/0;0/0;0/1         |             |
| chr13 | 40665962 | 40665962 | G | A | FOXO1    | exonic | nonsynonymous SNV | FOXO1:NM_002015:exon1:c.C251T:p.P84L                                                                                                                                                                                                                                                                                                                                                                                                                                                                                            | 1.719 | 0.001    |          | 0.0007   | Fam63_f_m_aF           | 0/0;0/1;0/1             |             |
| chr13 | 40665962 | 40665962 | G | A | FOXO1    | exonic | nonsynonymous SNV | FOXO1:NM_002015:exon1:c.C251T:p.P84L                                                                                                                                                                                                                                                                                                                                                                                                                                                                                            | 1.719 | 0.001    |          | 0.0007   | Fam62_f_m_aM_aM        | 0/1;0/0;0/1;0/1         |             |
| chr13 | 40666031 | 40666031 | G | A | FOXO1    | exonic | nonsynonymous SNV | FOXO1:NM_002015:exon1:c.C182T:p.A61V                                                                                                                                                                                                                                                                                                                                                                                                                                                                                            | 1.696 | 7.41E-05 |          | 4.20E-05 | Fam106_f_m_aM          | 0/0;0/1;0/1             |             |
| chr13 | 41131191 | 41131191 | C | G | KBTBD6   | exonic | nonsynonymous SNV | KBTBD6:NM_152903:exon1:c.G1321C:p.G441R                                                                                                                                                                                                                                                                                                                                                                                                                                                                                         | 2.305 |          |          |          | Fam88_f_m_aF           | 0/1;0/0;0/1             |             |
| chr13 | 41192409 | 41192409 | G | A | KBTBD7   | exonic | nonsynonymous SNV | KBTBD7:NM_032138:exon1:c.C1849T:p.R617C                                                                                                                                                                                                                                                                                                                                                                                                                                                                                         | 1.936 |          | 0.0001   | 2.79E-05 | Fam40_f_m_aM_aM        | 0/0;0/0;0/0;0/1         |             |
| chr13 | 43322494 | 43322494 | C | T | ENOX1    | exonic | nonsynonymous SNV | ENOX1:NM_001347963:exon10:c.G1256A:p.R419Q,ENOX1:NM_001347965:exon10:c.G1151A:p.R384Q,ENOX1:NM_01347967:exon10:c.G1151A:p.R384Q,ENOX1:NM_001347970:exon10:c.G1034A:p.R345Q,ENOX1:NM_001347971:exon10:c.G1034A:p.R345Q,ENOX1:NM_001127615:exon11:c.G1151A:p.R384Q,ENOX1:NM_001242863:exon11:c.G1151A:p.R384Q,ENOX1:NM_001347969:exon11:c.G1151A:p.R384Q,ENOX1:NM_017993:exon11:c.G1151A:p.R384Q,ENOX1:NM_001347964:exon12:c.G1151A:p.R384Q,ENOX1:NM_001347966:exon12:c.G1151A:p.R384Q,ENOX1:NM_001347968:exon12:c.G1151A:p.R384Q | 1.64  | 7.34E-05 | 0.0001   | 4.19E-05 | Fam101_f_m_aM          | 0/1;0/0;0/1             |             |
| chr13 | 45411392 | 45411392 | C | T | SLC25A30 | exonic | nonsynonymous SNV | SLC25A30:NM_001010875:exon2:c.G34A:p.G12R                                                                                                                                                                                                                                                                                                                                                                                                                                                                                       | 1.048 |          | 6.55E-05 |          | Fam16_f_m_aM_aM        | 0/1;0/0;0/0;0/1         |             |
| chr13 | 45481237 | 45481237 | T | A | COG3     | exonic | nonsynonymous SNV | COG3:NM_031431:exon5:c.T557A:p.L186H                                                                                                                                                                                                                                                                                                                                                                                                                                                                                            | 1.063 |          |          |          | Fam77_f_m_aM_aF_uM_uFs | 0/0;0/1;0/1;0/1;0/1;0/0 |             |
| chr13 | 46064720 | 46064720 | G | A | CPB2     | exonic | nonsynonymous SNV | CPB2:NM_001278541:exon7:c.C613T:p.R205C,CPB2:NM_01872:exon8:c.C724T:p.R242C                                                                                                                                                                                                                                                                                                                                                                                                                                                     | 1.402 |          | 1.12E-05 |          | Fam35_f_m_aF_uM        | 0/1;0/0;0/1;0/0         |             |
| chr13 | 46154854 | 46154854 | A | G | LCP1     | exonic | nonsynonymous SNV | LCP1:NM_002298:exon6:c.T524C:p.J175T                                                                                                                                                                                                                                                                                                                                                                                                                                                                                            | 1.249 | 7.34E-05 | 3.27E-05 | 1.40E-05 | Fam16_f_m_aM_aM        | 0/0;0/1;0/0;0/1         |             |
| chr13 | 49931134 | 49931134 | C | T | SPRYD7   | exonic | nonsynonymous SNV | SPRYD7:NM_020456:exon2:c.G107A:p.G36E                                                                                                                                                                                                                                                                                                                                                                                                                                                                                           | 1.575 | 7.36E-05 | 0.0006   | 0.0001   | Fam109_f_m_aM          | 0/1;0/0;0/1             |             |
| chr13 | 50843361 | 50843361 | C | G | DLEU7    | exonic | nonsynonymous SNV | DLEU7:NM_001306135:exon1:c.G286C:p.G96R,DLEU7:NM_198989:exon1:c.G286C:p.G96R                                                                                                                                                                                                                                                                                                                                                                                                                                                    | 2.082 |          |          | 1.40E-05 | Fam5_f_m_aM            | 0/0;0/1;0/1             |             |
| chr13 | 75299365 | 75299365 | G | A | TBC1D4   | exonic | nonsynonymous SNV | TBC1D4:NM_001286659:exon15:c.C2932T:p.R978C,TBC1D4:NM_001286658:exon16:c.C3097T:p.R1035C,TBC1D4:NM_014832:exon17:c.C3121T:p.R1041C                                                                                                                                                                                                                                                                                                                                                                                              | 1.284 | 7.34E-05 | 3.27E-05 | 2.79E-05 | Fam81_f_m_aM_uM        | 0/1;0/0;0/1;0/1         |             |
| chr13 | 75481643 | 75481643 | C | T | TBC1D4   | exonic | nonsynonymous SNV | TBC1D4:NM_001286659:exon1:c.G125A:p.G42E,TBC1D4:NM_001286659:exon1:c.G125A:p.G42E,TBC1D4:NM_014832:exon1:c.G125A:p.G42E                                                                                                                                                                                                                                                                                                                                                                                                         | 1.252 |          |          |          | Fam6_f_m_aM            | 0/1;0/0;0/1             |             |
| chr13 | 77007282 | 77007282 | C | T | FBXL3    | exonic | nonsynonymous SNV | FBXL3:NM_012158:exon5:c.G1150A:p.G384S                                                                                                                                                                                                                                                                                                                                                                                                                                                                                          | 2.024 |          |          |          | Fam44_f_m_aM_uF        | 0/1;0/0;0/1;0/0         |             |
| chr13 | 77067627 | 77067627 | C | T | MYCBP2   | exonic | nonsynonymous SNV | MYCBP2:NM_015057:exon71:c.G12409A:p.G4137S                                                                                                                                                                                                                                                                                                                                                                                                                                                                                      | 1.891 |          |          |          | Fam116_f_m_aM_aF       | 0/1;0/0;0/1;0/1         |             |
| chr13 | 77158091 | 77158091 | C | T | MYCBP2   | exonic | nonsynonymous SNV | MYCBP2:NM_015057:exon45:c.G6616A:p.G2206R                                                                                                                                                                                                                                                                                                                                                                                                                                                                                       | 1.066 |          |          |          | Fam113_f_m_aF_raM_uF   | 0/0;0/0;0/0;0/1;0/0     |             |
| chr13 | 79344303 | 79344303 | T | C | RBM26    | exonic | nonsynonymous SNV | RBM26:NM_001286632:exon15:c.A2132G:p.Q711R,RBM26:NM_022118:exon15:c.A2123G:p.Q708R,RBM26:NM_001286631:exon16:c.A2210G:p.Q737R,RBM26:NM_001366735:exon16:c.A2204G:p.Q735R                                                                                                                                                                                                                                                                                                                                                        | 1.2   |          | 1.12E-05 |          | Fam112_f_m_aM          | 0/1;0/0;0/1             |             |
| chr13 | 79481278 | 79481278 | G | C | NDFIP2   | exonic | nonsynonymous SNV | NDFIP2:NM_001161407:exon1:c.G75C:p.E25D,NDFIP2:NM_019080:exon1:c.G75C:p.E25D                                                                                                                                                                                                                                                                                                                                                                                                                                                    | 1.042 |          |          |          | Fam23_f_m_aM_dF_uFs    | 0/1;0/0;0/1;0/1;0/0     |             |
| chr13 | 87676500 | 87676500 | C | A | SLITRK5  | exonic | nonsynonymous SNV | SLITRK5:NM_015567:exon2:c.C1112A:p.P371H                                                                                                                                                                                                                                                                                                                                                                                                                                                                                        | 1.256 |          | 5.59E-05 | 2.09E-05 | Fam100_f_m_aF          | 0/1;0/0;0/1             |             |

|       |           |           |   |   |         |          |                   |                                                                                                                                                                                                                                                                                                                                                                                                                                                                                                                                                                                                                                                                                                                                                                                                                                                                                                                                                                                                                                                  |   |       |          |          |          |                        |                         |                 |
|-------|-----------|-----------|---|---|---------|----------|-------------------|--------------------------------------------------------------------------------------------------------------------------------------------------------------------------------------------------------------------------------------------------------------------------------------------------------------------------------------------------------------------------------------------------------------------------------------------------------------------------------------------------------------------------------------------------------------------------------------------------------------------------------------------------------------------------------------------------------------------------------------------------------------------------------------------------------------------------------------------------------------------------------------------------------------------------------------------------------------------------------------------------------------------------------------------------|---|-------|----------|----------|----------|------------------------|-------------------------|-----------------|
| chr13 | 95641820  | 95641820  | G | T | DZIP1   | exonic   | nonsynonymous SNV | DZIP1.NM_014934:exon5:c.C72A:p.S24R,DZIP1:NM_198968:exon5:c.C72A:p.S24R                                                                                                                                                                                                                                                                                                                                                                                                                                                                                                                                                                                                                                                                                                                                                                                                                                                                                                                                                                          | . | 1.16  | .        | .        | 2.10E-05 | Fam43_f_m_aM           | 0/1;0/0;0/1             |                 |
| chr13 | 98014064  | 98014064  | A | T | IPO5    | exonic   | nonsynonymous SNV | IPO5:NM_002271:exon22:c.A2175T:p.E725D                                                                                                                                                                                                                                                                                                                                                                                                                                                                                                                                                                                                                                                                                                                                                                                                                                                                                                                                                                                                           | . | 1.873 | 0.0005   | 0.001    | 0.0005   | Fam19_f_m_aM           | 0/0;0/1;0/1             |                 |
| chr13 | 98902435  | 98902435  | A | C | DOCK9   | exonic   | nonsynonymous SNV | DOCK9:NM_001130049:exon12:c.T1236G:p.I412M,DOCK9:NM_001130050:exon12:c.T1233G:p.I411M,DOCK9:NM_001366677:exon12:c.T1269G:p.I423M,DOCK9:NM_001366679:exon12:c.T1233G:p.I411M,DOCK9:NM_001366680:exon12:c.T1233G:p.I411M,DOCK9:NM_001366681:exon12:c.T1233G:p.I411M,DOCK9:NM_001366682:exon12:c.T1233G:p.I411M,DOCK9:NM_001366683:exon12:c.T1233G:p.I411M,DOCK9:NM_001366684:exon12:c.T1233G:p.I411M                                                                                                                                                                                                                                                                                                                                                                                                                                                                                                                                                                                                                                               | . | 1.035 | .        | 3.37E-05 | .        | Fam80_f_m_aM_uM        | 0/0;0/1;0/1;0/0         |                 |
| chr13 | 99529570  | 99529570  | T | C | TM9SF2  | exonic   | nonsynonymous SNV | TM9SF2:NM_004800:exon4:c.T437C:p.M146T                                                                                                                                                                                                                                                                                                                                                                                                                                                                                                                                                                                                                                                                                                                                                                                                                                                                                                                                                                                                           | . | 1.423 | .        | 0.0001   | 1.40E-05 | Fam98_f_m_aM           | 0/0;0/1;0/1             |                 |
| chr13 | 101143192 | 101143192 | C | A | NALCN   | exonic   | nonsynonymous SNV | NALCN:NM_001350750:exon16:c.G1919T:p.R640L,NALCN:NM_001350751:exon16:c.G1919T:p.R640L,NALCN:NM_001350748:exon17:c.G2006T:p.R669L,NALCN:NM_001350749:exon17:c.G2006T:p.R669L,NALCN:NM_052867:exon17:c.G2006T:p.R669L                                                                                                                                                                                                                                                                                                                                                                                                                                                                                                                                                                                                                                                                                                                                                                                                                              | . | 1.228 | .        | .        | .        | Fam18_f_m_aM_uF        | 0/1;0/0;0/1;0/0         |                 |
| chr13 | 101567725 | 101567725 | T | C | ITGBL1  | exonic   | nonsynonymous SNV | ITGBL1:NM_001271756:exon2:c.T64C:p.C22R,ITGBL1:NM_004791:exon3:c.T343C:p.C115R                                                                                                                                                                                                                                                                                                                                                                                                                                                                                                                                                                                                                                                                                                                                                                                                                                                                                                                                                                   | . | 1.058 | .        | .        | .        | Fam38_f_m_aM           | 0/1;0/0;0/1             |                 |
| chr13 | 110170577 | 110170577 | G | A | COL4A1  | exonic   | nonsynonymous SNV | COL4A1:NM_001845:exon42:c.C3712T:p.R1238C                                                                                                                                                                                                                                                                                                                                                                                                                                                                                                                                                                                                                                                                                                                                                                                                                                                                                                                                                                                                        | . | 1.408 | 0.0004   | 0.0005   | 0.0001   | Fam100_f_m_aF          | 0/0;0/1;0/1             |                 |
| chr13 | 110457425 | 110457425 | G | C | COL4A2  | exonic   | nonsynonymous SNV | COL4A2:NM_001846:exon21:c.G1422C:p.K474N                                                                                                                                                                                                                                                                                                                                                                                                                                                                                                                                                                                                                                                                                                                                                                                                                                                                                                                                                                                                         | . | 1.087 | .        | .        | .        | Fam110_f_m_aM_aM_uMs   | 0/0;0/1;0/0;0/1;0/0     |                 |
| chr13 | 110503184 | 110503184 | G | A | COL4A2  | exonic   | nonsynonymous SNV | COL4A2:NM_001846:exon42:c.G3941A:p.G1314E                                                                                                                                                                                                                                                                                                                                                                                                                                                                                                                                                                                                                                                                                                                                                                                                                                                                                                                                                                                                        | . | 1.16  | .        | .        | .        | Fam77_f_m_aM_aF_uM_uFs | 0/1;0/0;0/1;0/0;0/1;0/0 |                 |
| chr13 | 110561447 | 110561447 | A | G | RAB20   | exonic   | nonsynonymous SNV | RAB20:NM_017817:exon1:c.T73C:p.Y25H                                                                                                                                                                                                                                                                                                                                                                                                                                                                                                                                                                                                                                                                                                                                                                                                                                                                                                                                                                                                              | . | 1.557 | 0.0005   | 0.0006   | 0.0003   | Fam94_f_m_aM           | 0/0;0/1;0/1             |                 |
| chr13 | 111217851 | 111217851 | G | C | ARHGEF7 | exonic   | nonsynonymous SNV | ARHGEF7:NM_001320851:exon3:c.G170C:p.S57T,ARHGEF7:NM_001330598:exon3:c.G170C:p.S57T,ARHGEF7:NM_001354047:exon3:c.G425C:p.S142T,ARHGEF7:NM_001354053:exon3:c.G170C:p.S57T,ARHGEF7:NM_001354056:exon3:c.G170C:p.S57T,ARHGEF7:NM_001113512:exon4:c.G554C:p.S185T,ARHGEF7:NM_001113513:exon4:c.G170C:p.S57T,ARHGEF7:NM_001320853:exon4:c.G395C:p.S132T,ARHGEF7:NM_001354050:exon4:c.G170C:p.S57T,ARHGEF7:NM_001354051:exon4:c.G170C:p.S57T,ARHGEF7:NM_001354060:exon4:c.G170C:p.S57T,ARHGEF7:NM_003899:exon4:c.G170C:p.S57T,ARHGEF7:NM_001320852:exon5:c.G641C:p.S214T,ARHGEF7:NM_001330597:exon5:c.G170C:p.S57T,ARHGEF7:NM_001354046:exon5:c.G641C:p.S214T,ARHGEF7:NM_001354048:exon5:c.G170C:p.S57T,ARHGEF7:NM_001354049:exon5:c.G170C:p.S57T,ARHGEF7:NM_001354052:exon5:c.G170C:p.S57T,ARHGEF7:NM_001354054:exon5:c.G170C:p.S57T,ARHGEF7:NM_001354057:exon5:c.G170C:p.S57T,ARHGEF7:NM_145735:exon5:c.G641C:p.S214T,ARHGEF7:NM_001113511:exon6:c.G704C:p.S235T,ARHGEF7:NM_001354058:exon6:c.G170C:p.S57T,ARHGEF7:NM_001354059:exon6:c.G170C:p.S57T | . | 1.44  | .        | .        | .        | Fam70_f_m_aM           | 0/1;0/0;0/1             |                 |
| chr13 | 111292198 | 111292198 | A | G | ARHGEF7 | exonic   | nonsynonymous SNV | ARHGEF7:NM_001320854:exon14:c.A1510G:p.S504G,ARHGEF7:NM_001354055:exon14:c.A1510G:p.S504G,ARHGEF7:NM_001354061:exon15:c.A1372G:p.S458G,ARHGEF7:NM_001330598:exon17:c.A1744G:p.S582G,ARHGEF7:NM_001354047:exon17:c.A1999G:p.S667G,ARHGEF7:NM_001354056:exon17:c.A1744G:p.S582G,ARHGEF7:NM_001113512:exon18:c.A2128G:p.S710G,ARHGEF7:NM_001354050:exon18:c.A1744G:p.S582G,ARHGEF7:NM_001354051:exon18:c.A1744G:p.S582G,ARHGEF7:NM_001354060:exon18:c.A1744G:p.S582G,ARHGEF7:NM_001330597:exon19:c.A1744G:p.S582G,ARHGEF7:NM_001354046:exon19:c.A2215G:p.S739G,ARHGEF7:NM_001354048:exon19:c.A1744G:p.S582G,ARHGEF7:NM_001354049:exon19:c.A1744G:p.S582G,ARHGEF7:NM_001354057:exon19:c.A1744G:p.S582G,ARHGEF7:NM_145735:exon19:c.A2215G:p.S739G,ARHGEF7:NM_001113511:exon20:c.A2278G:p.S760G,ARHGEF7:NM_001354058:exon20:c.A1744G:p.S582G,ARHGEF7:NM_001354059:exon20:c.A1744G:p.S582G                                                                                                                                                              | . | 1.432 | 0.0001   | 3.35E-05 | 3.35E-05 | 2.09E-05               | Fam85_f_m_aM_aM         | 0/1;0/0;0/1;0/0 |
| chr13 | 112856059 | 112856059 | C | T | ATP11A  | exonic   | nonsynonymous SNV | ATP11A:NM_015205:exon20:c.C2392T:p.R798C,ATP11A:NM_032189:exon20:c.C2392T:p.R798C                                                                                                                                                                                                                                                                                                                                                                                                                                                                                                                                                                                                                                                                                                                                                                                                                                                                                                                                                                | . | 1.182 | .        | 9.85E-05 | 2.09E-05 | Fam37_f_m_aF_uM        | 0/1;0/0;0/1;0/0         |                 |
| chr13 | 114018110 | 114018110 | C | T | RASA3   | exonic   | nonsynonymous SNV | RASA3:NM_001320822:exon11:c.G989A:p.R330Q,RASA3:NM_007368:exon11:c.G1085A:p.R362Q                                                                                                                                                                                                                                                                                                                                                                                                                                                                                                                                                                                                                                                                                                                                                                                                                                                                                                                                                                | . | 1.284 | .        | 2.18E-05 | 4.19E-05 | Fam42_f_m_aM_uF        | 0/1;0/0;0/1;0/1         |                 |
| chr14 | 20460788  | 20460788  | G | C | PIP4P1  | exonic   | nonsynonymous SNV | PIP4P1:NM_001100814:exon2:c.C221G:p.P74R,PIP4P1:NM_144568:exon2:c.C200G:p.P67R                                                                                                                                                                                                                                                                                                                                                                                                                                                                                                                                                                                                                                                                                                                                                                                                                                                                                                                                                                   | . | 1.598 | 0.0006   | 0.0008   | 0.0002   | Fam15_f_m_aM_aM        | 0/1;0/0;0/1;0/1         |                 |
| chr14 | 20996636  | 20996636  | G | A | METTL17 | exonic   | nonsynonymous SNV | METTL17:NM_001029991:exon13:c.G1190A:p.R397H,METTL17:NM_022734:exon13:c.G1190A:p.R397H                                                                                                                                                                                                                                                                                                                                                                                                                                                                                                                                                                                                                                                                                                                                                                                                                                                                                                                                                           | . | 1.1   | 7.34E-05 | 0.0003   | 4.19E-05 | Fam88_f_m_aF           | 0/1;0/0;0/1             |                 |
| chr14 | 21093244  | 21093244  | G | A | ZNF219  | exonic   | nonsynonymous SNV | ZNF219:NM_001101672:exon3:c.C53T:p.P18L,ZNF219:NM_001102454:exon3:c.C53T:p.P18L                                                                                                                                                                                                                                                                                                                                                                                                                                                                                                                                                                                                                                                                                                                                                                                                                                                                                                                                                                  | . | 1.871 | .        | 1.23E-05 | .        | Fam121_f_m_aF_aM       | 0/0;0/1;0/1;0/0         |                 |
| chr14 | 21403633  | 21403633  | C | T | CHD8    | exonic   | nonsynonymous SNV | CHD8:NM_001170629:exon17:c.G3338A:p.R1113H,CHD8:NM_020920:exon17:c.G2501A:p.R834H                                                                                                                                                                                                                                                                                                                                                                                                                                                                                                                                                                                                                                                                                                                                                                                                                                                                                                                                                                | . | 2.622 | .        | .        | 6.99E-06 | Fam91_m_aM_dM_aM_dM    | 0/0;0/0;0/0;0/1;0/0     |                 |
| chr14 | 21409849  | 21409849  | A | G | CHD8    | splicing | .                 | .                                                                                                                                                                                                                                                                                                                                                                                                                                                                                                                                                                                                                                                                                                                                                                                                                                                                                                                                                                                                                                                | . | 0.144 | .        | .        | 9.92E-05 | 2.09E-05               | Fam62_f_m_aM_aM         | 0/1;0/0;0/1;0/1 |
| chr14 | 22842475  | 22842475  | G | A | MMP14   | exonic   | nonsynonymous SNV | MMP14:NM_004995:exon4:c.G446A:p.R149H                                                                                                                                                                                                                                                                                                                                                                                                                                                                                                                                                                                                                                                                                                                                                                                                                                                                                                                                                                                                            | . | 1.472 | 0.0006   | 0.0002   | 5.58E-05 | Fam119_f_m_aM_aM       | 0/1;0/0;0/1;0/1         |                 |

|       |          |          |   |   |                  |        |                   |                                                                                                                                                                                                                                                                                                                                                                                                                                                                                                                                                                                                                                                                                                                                                                                                                                                                                                                                                                                                                                                          |       |          |          |                        |                         |                         |
|-------|----------|----------|---|---|------------------|--------|-------------------|----------------------------------------------------------------------------------------------------------------------------------------------------------------------------------------------------------------------------------------------------------------------------------------------------------------------------------------------------------------------------------------------------------------------------------------------------------------------------------------------------------------------------------------------------------------------------------------------------------------------------------------------------------------------------------------------------------------------------------------------------------------------------------------------------------------------------------------------------------------------------------------------------------------------------------------------------------------------------------------------------------------------------------------------------------|-------|----------|----------|------------------------|-------------------------|-------------------------|
| chr14 | 22988015 | 22988015 | C | T | C14orf93         | exonic | nonsynonymous SNV | C14orf93:NM_001130708:exon6:c.G1085A:p.G362E,C14orf93:NM_001282970:exon6:c.G1085A:p.G362E,C14orf93:NM_001130706:exon7:c.G1085A:p.G362E,C14orf93:NM_001282968:exon7:c.G545A:p.G182E,C14orf93:NM_001282969:exon7:c.G545A:p.G182E<br>C14orf93:NM_001130708:exon3:c.C673A:p.P225T,C14orf93:NM_001282970:exon3:c.C673A:p.P225T,C14orf93:NM_021944:exon3:c.C673A:p.P225T,C14orf93:NM_001130706:exon4:c.C673A:p.P225T,C14orf93:NM_001282968:exon4:c.C133A:p.P45T,C14orf93:NM_001282969:exon4:c.C133A:p.P45T                                                                                                                                                                                                                                                                                                                                                                                                                                                                                                                                                     | 1.216 | 5.60E-05 | 6.99E-06 | Fam53_f_m_aM           | 0/1;0/0;0/1             |                         |
| chr14 | 22996193 | 22996193 | G | T | C14orf93         | exonic | nonsynonymous SNV | 21944:exon3:c.C673A:p.P225T,C14orf93:NM_001130706:exon4:c.C673A:p.P225T,C14orf93:NM_001282968:exon4:c.C133A:p.P45T,C14orf93:NM_001282969:exon4:c.C133A:p.P45T                                                                                                                                                                                                                                                                                                                                                                                                                                                                                                                                                                                                                                                                                                                                                                                                                                                                                            | 1.119 |          |          | Fam121_f_m_aF_aM       | 0/1;0/0;0/1;0/1         |                         |
| chr14 | 23053548 | 23053548 | G | C | CDH24            | exonic | nonsynonymous SNV | CDH24:NM_022478:exon7:c.C1174G:p.L392V,CDH24:NM_144985:exon7:c.C1174G:p.L392V<br>ACIN1:NM_001164816:exon10:c.G1382T:p.R461L,ACIN1:NM_001164817:exon11:c.G1289T:p.R430L,ACIN1:NM_001164815:exon16:c.G3443T:p.R1148L,ACIN1:NM_001164814:exon17:c.G3524T:p.R1175L,ACIN1:NM_014977:exon17:c.G3563T:p.R1188L                                                                                                                                                                                                                                                                                                                                                                                                                                                                                                                                                                                                                                                                                                                                                  | 1.032 | 0.0001   | 2.79E-05 | Fam62_f_m_aM_aM        | 0/1;0/0;0/1;0/1         |                         |
| chr14 | 23061333 | 23061333 | C | A | ACIN1            | exonic | nonsynonymous SNV | ACIN1:NM_001164816:exon10:c.G1367A:p.R456H,ACIN1:NM_001164817:exon11:c.G1274A:p.R425H,ACIN1:NM_001164815:exon16:c.G3428A:p.R1143H,ACIN1:NM_001164814:exon17:c.G3509A:p.R1170H,ACIN1:NM_014977:exon17:c.G3548A:p.R1183H                                                                                                                                                                                                                                                                                                                                                                                                                                                                                                                                                                                                                                                                                                                                                                                                                                   | 2.298 | 0.0001   | 0.0002   | 0.0002                 | Fam54_f_m_aM_uF         | 0/1;0/0;0/1;0/0         |
| chr14 | 23061348 | 23061348 | C | T | ACIN1            | exonic | nonsynonymous SNV | ACIN1:NM_001164816:exon10:c.G1367A:p.R456H,ACIN1:NM_001164817:exon11:c.G1274A:p.R425H,ACIN1:NM_001164815:exon16:c.G3428A:p.R1143H,ACIN1:NM_001164814:exon17:c.G3509A:p.R1170H,ACIN1:NM_014977:exon17:c.G3548A:p.R1183H                                                                                                                                                                                                                                                                                                                                                                                                                                                                                                                                                                                                                                                                                                                                                                                                                                   | 2.299 |          | 6.56E-05 | 2.79E-05               | Fam85_f_m_aM_aM         | 0/1;0/0;0/0;0/1         |
| chr14 | 23307895 | 23307895 | A | G | BCL2L2;BCL2L2-PA | exonic | nonsynonymous SNV | BCL2L2:NM_001199839:exon3:c.A128G:p.H43R,BCL2L2-PABPN1:NM_001199864:exon3:c.A128G:p.H43R,BCL2L2:NM_004050:exon3:c.A128G:p.H43R<br>PABPN1:NM_001360552:exon5:c.C445T:p.R149C,PABPN1:NM_001360551:exon6:c.C829T:p.R277C,PABPN1:NM_004643:exon6:c.C829T:p.R277C,BCL2L2-PABPN1:NM_001199864:exon8:c.C910T:p.R304C                                                                                                                                                                                                                                                                                                                                                                                                                                                                                                                                                                                                                                                                                                                                            | 1.536 | 0.0001   | 0.0002   | 0.0002                 | Fam64_f_m_aM            | 0/0;0/1;0/1             |
| chr14 | 23324237 | 23324237 | C | T | BCL2L2-PABPN1;P  | exonic | nonsynonymous SNV | MYH6:NM_002471:exon22:c.A2864T:p.D955V                                                                                                                                                                                                                                                                                                                                                                                                                                                                                                                                                                                                                                                                                                                                                                                                                                                                                                                                                                                                                   | 2.133 | 0.0001   | 1.12E-05 | 6.98E-06               | Fam108_f_m_aM           | 0/0;0/1;0/1             |
| chr14 | 23393730 | 23393730 | T | A | MYH6             | exonic | nonsynonymous SNV | MYH6:NM_002471:exon10:c.T824A:p.I275N                                                                                                                                                                                                                                                                                                                                                                                                                                                                                                                                                                                                                                                                                                                                                                                                                                                                                                                                                                                                                    | 1.357 |          |          | Fam64_f_m_aM           | 0/0;0/1;0/1             |                         |
| chr14 | 23403422 | 23403422 | A | T | MYH6             | exonic | nonsynonymous SNV | MYH6:NM_002471:exon10:c.T824A:p.I275N                                                                                                                                                                                                                                                                                                                                                                                                                                                                                                                                                                                                                                                                                                                                                                                                                                                                                                                                                                                                                    | 1.113 | 0.0001   | 0.0002   | 0.0002                 | Fam72_f_m_aF_uF         | 0/1;0/0;0/1;0/0         |
| chr14 | 23416063 | 23416063 | C | T | MYH7             | exonic | nonsynonymous SNV | MYH7:NM_000257:exon34:c.G4894A:p.A1632T                                                                                                                                                                                                                                                                                                                                                                                                                                                                                                                                                                                                                                                                                                                                                                                                                                                                                                                                                                                                                  | 1.522 |          | 0.0002   | 2.79E-05               | Fam49_f_m_aM            | 0/0;0/1;0/1             |
| chr14 | 23418234 | 23418234 | C | T | MYH7             | exonic | nonsynonymous SNV | MYH7:NM_000257:exon30:c.G4145A:p.R1382Q                                                                                                                                                                                                                                                                                                                                                                                                                                                                                                                                                                                                                                                                                                                                                                                                                                                                                                                                                                                                                  | 1.674 |          | 6.17E-05 | 1.40E-05               | Fam65_f_m_aM_uF_dF      | 0/1;0/0;0/1;0/0;0/1     |
| chr14 | 23421008 | 23421008 | C | A | MYH7             | exonic | nonsynonymous SNV | MYH7:NM_000257:exon26:c.G3286T:p.D1096Y                                                                                                                                                                                                                                                                                                                                                                                                                                                                                                                                                                                                                                                                                                                                                                                                                                                                                                                                                                                                                  | 1.278 | 0.0002   | 0.0003   | 0.0001                 | Fam48_f_m_aM_uM         | 0/1;0/0;0/1;0/1         |
| chr14 | 24055701 | 24055701 | G | T | CARMIL3          | exonic | nonsynonymous SNV | CARMIL3:NM_138360:exon10:c.G682T:p.G228C                                                                                                                                                                                                                                                                                                                                                                                                                                                                                                                                                                                                                                                                                                                                                                                                                                                                                                                                                                                                                 | 1.061 |          | 6.55E-05 | 1.40E-05               | Fam121_f_m_aF_aM        | 0/0;0/1;0/1;0/0         |
| chr14 | 24060044 | 24060044 | C | T | CARMIL3          | exonic | nonsynonymous SNV | CARMIL3:NM_138360:exon23:c.C1943T:p.T648I                                                                                                                                                                                                                                                                                                                                                                                                                                                                                                                                                                                                                                                                                                                                                                                                                                                                                                                                                                                                                | 1.053 |          |          | Fam77_f_m_aM_aF_uM_uFs | 0/1;0/0;0/0;0/1;0/0;0/0 |                         |
| chr14 | 24155272 | 24155272 | G | A | RNF31            | exonic | nonsynonymous SNV | RNF31:NM_001310332:exon12:c.G1793A:p.R598H,RNF31:NM_017999:exon12:c.G2246A:p.R749H                                                                                                                                                                                                                                                                                                                                                                                                                                                                                                                                                                                                                                                                                                                                                                                                                                                                                                                                                                       | 1.773 |          | 0.0002   | 6.98E-06               | Fam56_f_m_aF_aM         | 0/1;0/0;0/0;0/1         |
| chr14 | 24427853 | 24427853 | C | T | CBLN3            | exonic | nonsynonymous SNV | CBLN3:NM_001039771:exon3:c.G554A:p.R185Q<br>SCFD1:NM_001283033:exon18:c.G1169A:p.R390Q,SCFD1:NM_001257376:exon19:c.G1448A:p.R483Q,SCFD1:NM_001283031:exon20:c.G1169A:p.R390Q,SCFD1:NM_001283002:exon20:c.G1547A:p.R516Q,SCFD1:NM_182835:exon20:c.G1523A:p.R508Q,SCFD1:NM_016106:exon21:c.G1724A:p.R575Q                                                                                                                                                                                                                                                                                                                                                                                                                                                                                                                                                                                                                                                                                                                                                  | 1.134 | 0.0003   | 0.0005   | 9.78E-05               | Fam46_f_m_aM_uM         | 0/0;0/1;0/1;0/0         |
| chr14 | 30719365 | 30719365 | G | A | SCFD1            | exonic | nonsynonymous SNV | SCFD1:NM_001283033:exon18:c.G1169A:p.R390Q,SCFD1:NM_001257376:exon19:c.G1448A:p.R483Q,SCFD1:NM_001283031:exon20:c.G1169A:p.R390Q,SCFD1:NM_001283002:exon20:c.G1547A:p.R516Q,SCFD1:NM_182835:exon20:c.G1523A:p.R508Q,SCFD1:NM_016106:exon21:c.G1724A:p.R575Q                                                                                                                                                                                                                                                                                                                                                                                                                                                                                                                                                                                                                                                                                                                                                                                              | 1.182 | 7.36E-05 | 7.49E-05 | 2.10E-05               | Fam28_f_m_aF_uF         | 0/1;0/0;0/1;0/1         |
| chr14 | 31109504 | 31109504 | C | G | HECTD1           | exonic | nonsynonymous SNV | HECTD1:NM_015382:exon36:c.G6373C:p.V2125L                                                                                                                                                                                                                                                                                                                                                                                                                                                                                                                                                                                                                                                                                                                                                                                                                                                                                                                                                                                                                | 1.344 |          | 1.12E-05 |                        | Fam119_f_m_aM_aM        | 0/0;0/1;0/1;0/0         |
| chr14 | 31144223 | 31144223 | A | G | HECTD1           | exonic | nonsynonymous SNV | HECTD1:NM_015382:exon17:c.T2666C:p.M889T                                                                                                                                                                                                                                                                                                                                                                                                                                                                                                                                                                                                                                                                                                                                                                                                                                                                                                                                                                                                                 | 1.133 |          |          |                        | Fam38_f_m_aM            | 0/0;0/1;0/1             |
| chr14 | 34783829 | 34783829 | C | T | BAZ1A            | exonic | nonsynonymous SNV | BAZ1A:NM_182648:exon14:c.G1834A:p.A612T,BAZ1A:NM_013448:exon15:c.G1930A:p.A644T                                                                                                                                                                                                                                                                                                                                                                                                                                                                                                                                                                                                                                                                                                                                                                                                                                                                                                                                                                          | 1.187 |          |          |                        | Fam77_f_m_aM_aF_uM_uFs  | 0/0;0/1;0/0;0/1;0/0;0/1 |
| chr14 | 35116626 | 35116626 | G | A | PPP2R3C          | exonic | nonsynonymous SNV | PPP2R3C:NM_017917:exon2:c.C170T:p.P57L                                                                                                                                                                                                                                                                                                                                                                                                                                                                                                                                                                                                                                                                                                                                                                                                                                                                                                                                                                                                                   | 1.236 |          |          |                        | Fam96_f_m_aM_uF         | 0/0;0/1;0/1;0/1         |
| chr14 | 35672956 | 35672956 | T | A | RALGAPA1         | exonic | nonsynonymous SNV | RALGAPA1:NM_001330075:exon24:c.A4843T:p.M1615L,RALGAPA1:NM_001346243:exon24:c.A3466T:p.M1156L,RALGAPA1:NM_001346246:exon24:c.A3466T:p.M1156L,RALGAPA1:NM_001346248:exon24:c.A4843T:p.M1615L,RALGAPA1:NM_014990:exon24:c.A3466T:p.M1156L,RALGAPA1:NM_194301:exon24:c.A3466T:p.M1156L,RALGAPA1:NM_001283043:exon25:c.A3505T:p.M1169L,RALGAPA1:NM_001283044:exon25:c.A3607T:p.M1203L,RALGAPA1:NM_001346245:exon25:c.A3607T:p.M1203L,RALGAPA1:NM_001346247:exon25:c.A3607T:p.M1203L,RALGAPA1:NM_001346249:exon25:c.A4984T:p.M1662L<br>RALGAPA1:NM_001330075:exon19:c.G4135C:p.D1379H,RALGAPA1:NM_001346243:exon19:c.G2758C:p.D920H,RALGAPA1:NM_001346246:exon19:c.G2758C:p.D920H,RALGAPA1:NM_001346248:exon19:c.G4135C:p.D1379H,RALGAPA1:NM_014990:exon19:c.G2758C:p.D920H,RALGAPA1:NM_194301:exon19:c.G2758C:p.D920H,RALGAPA1:NM_001283043:exon20:c.G2797C:p.D933H,RALGAPA1:NM_001283044:exon20:c.G2899C:p.D967H,RALGAPA1:NM_001346245:exon20:c.G2899C:p.D967H,RALGAPA1:NM_001346247:exon20:c.G2899C:p.D967H,RALGAPA1:NM_001346249:exon20:c.G4776C:p.N1476H | 1.578 |          | 1.20E-05 | 2.09E-05               | Fam113_f_m_aF_raM_uF    | 0/0;0/1;0/1;0/0;0/0     |
| chr14 | 35684947 | 35684947 | C | G | RALGAPA1         | exonic | nonsynonymous SNV | RALGAPA1:NM_001330075:exon19:c.G4135C:p.D1379H,RALGAPA1:NM_001346243:exon19:c.G2758C:p.D920H,RALGAPA1:NM_001346246:exon19:c.G2758C:p.D920H,RALGAPA1:NM_001346248:exon19:c.G4135C:p.D1379H,RALGAPA1:NM_014990:exon19:c.G2758C:p.D920H,RALGAPA1:NM_194301:exon19:c.G2758C:p.D920H,RALGAPA1:NM_001283043:exon20:c.G2797C:p.D933H,RALGAPA1:NM_001283044:exon20:c.G2899C:p.D967H,RALGAPA1:NM_001346245:exon20:c.G2899C:p.D967H,RALGAPA1:NM_001346247:exon20:c.G2899C:p.D967H,RALGAPA1:NM_001346249:exon20:c.G4776C:p.N1476H                                                                                                                                                                                                                                                                                                                                                                                                                                                                                                                                   | 1.484 |          | 3.36E-05 | 6.98E-06               | Fam63_f_m_aF            | 0/1;0/0;0/1             |
| chr14 | 38210311 | 38210311 | T | C | SSTR1            | exonic | nonsynonymous SNV | SSTR1:NM_001049:exon3:c.T922C:p.S308P                                                                                                                                                                                                                                                                                                                                                                                                                                                                                                                                                                                                                                                                                                                                                                                                                                                                                                                                                                                                                    | 1.552 |          | 1.12E-05 |                        | Fam56_f_m_aF_aM         | 0/1;0/0;0/1;0/1         |
| chr14 | 38255379 | 38255379 | A | G | CLEC14A          | exonic | nonsynonymous SNV | CLEC14A:NM_175060:exon1:c.T644C:p.L215P                                                                                                                                                                                                                                                                                                                                                                                                                                                                                                                                                                                                                                                                                                                                                                                                                                                                                                                                                                                                                  | 1.733 |          |          |                        | Fam122_f_m_aM           | 0/1;0/0;0/1             |

|       |          |          |      |   |         |          |                     |                                                                                                                                                                                                                                                                                                                                                                                                                |       |          |          |                                 |                         |
|-------|----------|----------|------|---|---------|----------|---------------------|----------------------------------------------------------------------------------------------------------------------------------------------------------------------------------------------------------------------------------------------------------------------------------------------------------------------------------------------------------------------------------------------------------------|-------|----------|----------|---------------------------------|-------------------------|
| chr14 | 50635366 | 50635366 | C    | A | SAV1    | exonic   | nonsynonymous SNV   | SAV1:NM_021818:exon5:c.G969T;p.K323N                                                                                                                                                                                                                                                                                                                                                                           | 1.003 |          | 6.54E-05 | Fam116_f_m_aM_aF                | 0/0;0/1;0/1;0/1         |
| chr14 | 52268375 | 52268375 | G    | T | PTGDR   | exonic   | nonsynonymous SNV   | PTGDR:NM_000953:exon1:c.G561T;p.M187I;PTGDR:NM_01281469:exon1:c.G561T;p.M187I                                                                                                                                                                                                                                                                                                                                  | 1.123 |          | 3.27E-05 | Fam120_f_m_aM_aM                | 0/1;0/0;0/1;0/1         |
| chr14 | 52274846 | 52274846 | G    | C | PTGDR   | exonic   | nonsynonymous SNV   | PTGDR:NM_000953:exon2:c.G962C;p.W321S                                                                                                                                                                                                                                                                                                                                                                          | 1.377 |          |          | Fam88_f_m_aF                    | 0/0;0/1;0/1             |
| chr14 | 53054576 | 53054576 | G    | A | DDHD1   | exonic   | nonsynonymous SNV   | DDHD1:NM_001160148:exon11:c.C2299T;p.R767C,DDHD1:NM_030637:exon11:c.C2299T;p.R767C,DDHD1:NM_001160147:exon12:c.C2320T;p.R774C                                                                                                                                                                                                                                                                                  | 1.515 |          | 3.28E-05 | Fam115_f_m_aF_aM_aF             | 0/1;0/0;0/1;0/0;0/1     |
| chr14 | 53152509 | 53152509 | A    | G | DDHD1   | exonic   | nonsynonymous SNV   | DDHD1:NM_001160147:exon1:c.T590C;p.L197P,DDHD1:NM_001160148:exon1:c.T590C;p.L197P,DDHD1:NM_030637:exon1:c.T590C;p.L197P                                                                                                                                                                                                                                                                                        | 1.622 |          |          | Fam37_f_m_aF_uM                 | 0/1;0/0;0/1;0/0         |
| chr14 | 54737225 | 54737225 | A    | T | SAMD4A  | exonic   | nonsynonymous SNV   | SAMD4A:NM_015589:exon3:c.A917T;p.E306V                                                                                                                                                                                                                                                                                                                                                                         | 1.179 |          |          | Fam84_f_m_aF                    | 0/0;0/1;0/1             |
| chr14 | 54760329 | 54760329 | G    | T | SAMD4A  | exonic   | nonsynonymous SNV   | SAMD4A:NM_001161577:exon2:c.G118T;p.D40Y,SAMD4A:NM_001161576:exon5:c.G1081T;p.D361Y,SAMD4A:NM_015589:exon6:c.G1345T;p.D449Y                                                                                                                                                                                                                                                                                    | 1.27  |          | 3.40E-05 | 6.98E-06 Fam97_f_m_aM_aF        | 0/1;0/0;0/0;0/1         |
| chr14 | 55380648 | 55380648 | A    | G | ATG14   | exonic   | nonsynonymous SNV   | ATG14:NM_014924:exon7:c.T920C;p.L307P                                                                                                                                                                                                                                                                                                                                                                          | 1.249 |          |          | Fam60_f_m_aF                    | 0/1;0/0;0/1             |
| chr14 | 59352581 | 59352581 | A    | G | DAAM1   | exonic   | nonsynonymous SNV   | DAAM1:NM_001270520:exon18:c.A2216G;p.H739R,DAAM1:NM_014992:exon18:c.A2246G;p.H749R                                                                                                                                                                                                                                                                                                                             | 1.051 |          | 1.12E-05 | 6.98E-06 Fam14_f_m_aM_aM        | 0/0;0/1;0/1;0/1         |
| chr14 | 60245952 | 60245956 | AAGA | - | PPM1A   | exonic   | frameshift deletion | PPM1A:NM_177952:exon1:c.105_109del;p.K40Gfs*8                                                                                                                                                                                                                                                                                                                                                                  | 0.396 | 0.0006   | 8.99E-05 | 6.98E-06 Fam32_f_m_aM_uM        | 0/0;0/1;0/1;0/1         |
| chr14 | 60724049 | 60724049 | T    | C | SIX4    | exonic   | nonsynonymous SNV   | SIX4:NM_017420:exon1:c.A26G;p.Q9R                                                                                                                                                                                                                                                                                                                                                                              | 1.23  |          |          | Fam5_f_m_aM                     | 0/0;0/1;0/1             |
| chr14 | 61450860 | 61450860 | G    | A | PRKCH   | exonic   | nonsynonymous SNV   | PRKCH:NM_006255:exon6:c.G721A;p.G241R                                                                                                                                                                                                                                                                                                                                                                          | 1.46  |          | 1.12E-05 | Fam14_f_m_aM_aM                 | 0/1;0/0;0/0;0/1         |
| chr14 | 61549752 | 61549752 | T    | C | PRKCH   | exonic   | nonsynonymous SNV   | PRKCH:NM_006255:exon14:c.T1973C;p.I658T                                                                                                                                                                                                                                                                                                                                                                        | 1.144 |          |          | Fam99_f_m_aM_aM                 | 0/0;0/1;0/1;0/0         |
| chr14 | 61721533 | 61721533 | T    | G | HIF1A   | exonic   | nonsynonymous SNV   | HIF1A:NM_001243084:exon3:c.T323G;p.M108R,HIF1A:NM_001530:exon3:c.T251G;p.M84R,HIF1A:NM_181054:exon3:c.T251G;p.M84R                                                                                                                                                                                                                                                                                             | 1.367 | 0.0003   | 6.56E-05 | 2.09E-05 Fam15_f_m_aM_aM        | 0/0;0/1;0/1;0/0         |
| chr14 | 62779855 | 62779855 | C    | T | KCNH5   | exonic   | nonsynonymous SNV   | KCNH5:NM_139318:exon10:c.G1892A;p.R631Q,PPP2R5E:NM_001282181:exon8:c.A634G;p.I212V,PPP2R5E:NM_001282182:exon8:c.A634G;p.I212V,PPP2R5E:NM_001282179:exon9:c.A862G;p.I288V,PPP2R5E:NM_001282180:exon9:c.A862G;p.I288V,PPP2R5E:NM_006246:exon9:c.A862G;p.I288V                                                                                                                                                    | 1.866 |          |          | 6.98E-06 Fam110_f_m_aM_aM_uMs   | 0/1;0/0;0/1;0/1;0/1     |
| chr14 | 63392013 | 63392013 | T    | C | PPP2R5E | exonic   | nonsynonymous SNV   | PPP2R5E:NM_001282181:exon8:c.A634G;p.I212V,PPP2R5E:NM_001282182:exon8:c.A634G;p.I212V,PPP2R5E:NM_001282179:exon9:c.A862G;p.I288V,PPP2R5E:NM_001282180:exon9:c.A862G;p.I288V,PPP2R5E:NM_006246:exon9:c.A862G;p.I288V                                                                                                                                                                                            | 1.024 | 0.0001   | 3.45E-05 | 6.98E-06 Fam82_f_m_aM_uF        | 0/0;0/1;0/1;0/1         |
| chr14 | 64418025 | 64418025 | G    | A | MTHFD1  | splicing | .                   | .                                                                                                                                                                                                                                                                                                                                                                                                              | 0.511 |          |          | Fam59_f_m_aF_uM                 | 0/0;0/1;0/1;0/0         |
| chr14 | 64454823 | 64454823 | G    | A | MTHFD1  | exonic   | nonsynonymous SNV   | MTHFD1:NM_001364837:exon26:c.G2666A;p.R889H,MTHFD1:NM_005956:exon26:c.G2666A;p.R889H                                                                                                                                                                                                                                                                                                                           | 1.267 | 7.35E-05 | 6.17E-05 | 3.49E-05 Fam78_f_m_aF_uM        | 0/0;0/1;0/1;0/0         |
| chr14 | 64801821 | 64801821 | T    | A | SPTB    | exonic   | nonsynonymous SNV   | SPTB:NM_001024858:exon5:c.A580T;p.N194Y,SPTB:NM_01355436:exon6:c.A580T;p.N194Y,SPTB:NM_001355437:exon6:c.A580T;p.N194Y                                                                                                                                                                                                                                                                                         | 1.812 |          |          | Fam70_f_m_aM                    | 0/1;0/0;0/1             |
| chr14 | 68880003 | 68880003 | G    | C | ACTN1   | exonic   | nonsynonymous SNV   | ACTN1:NM_001102:exon18:c.C2239G;p.Q747E,ACTN1:NM_001130004:exon18:c.C2239G;p.Q747E,ACTN1:NM_001130005:exon18:c.C2239G;p.Q747E                                                                                                                                                                                                                                                                                  | 1.92  | 0.0001   | 0.0001   | 6.98E-05 Fam77_f_m_aM_aF_uM_uFs | 0/1;0/0;0/1;0/1;0/0;0/0 |
| chr14 | 69055254 | 69055254 | C    | T | DCAF5   | exonic   | nonsynonymous SNV   | DCAF5:NM_001284206:exon9:c.G1429A;p.D477N,DCAF5:NM_001284207:exon9:c.G1186A;p.D396N,DCAF5:NM_003861:exon9:c.G1432A;p.D478N                                                                                                                                                                                                                                                                                     | 1.873 | 7.35E-05 | 7.46E-05 | Fam37_f_m_aF_uM                 | 0/0;0/1;0/1;0/0         |
| chr14 | 69338665 | 69338665 | G    | T | GALNT16 | exonic   | nonsynonymous SNV   | GALNT16:NM_001168368:exon10:c.G982T;p.V328L,GALNT16:NM_020692:exon10:c.G982T;p.V328L                                                                                                                                                                                                                                                                                                                           | 1.108 | 0.0001   | 4.47E-05 | 4.19E-05 Fam76_f_m_aM_uM        | 0/1;0/0;0/1;0/0         |
| chr14 | 70801008 | 70801008 | C    | T | MAP3K9  | exonic   | nonsynonymous SNV   | MAP3K9:NM_001284230:exon2:c.G479A;p.R160H,MAP3K9:NM_033141:exon2:c.G479A;p.R160H                                                                                                                                                                                                                                                                                                                               | 1.107 | 0.0003   | 0.0002   | 0.0001 Fam7_f_m_aM_aM_uM        | 0/1;0/0;0/0;0/1;0/0     |
| chr14 | 70808885 | 70808885 | G    | A | MAP3K9  | exonic   | nonsynonymous SNV   | MAP3K9:NM_001284230:exon1:c.C287T;p.T96I,MAP3K9:NM_033141:exon1:c.C287T;p.T96I                                                                                                                                                                                                                                                                                                                                 | 1.031 |          | 2.54E-05 | 1.40E-05 Fam45_f_m_aM_uF        | 0/0;0/1;0/1;0/0         |
| chr14 | 71588320 | 71588320 | G    | A | SIPA1L1 | exonic   | nonsynonymous SNV   | SIPA1L1:NM_001284246:exon2:c.G448A;p.D150N,SIPA1L1:NM_001284247:exon4:c.G448A;p.D150N,SIPA1L1:NM_001354285:exon5:c.G448A;p.D150N,SIPA1L1:NM_001354287:exon5:c.G448A;p.D150N,SIPA1L1:NM_001354288:exon5:c.G448A;p.D150N,SIPA1L1:NM_001354286:exon6:c.G448A;p.D150N,SIPA1L1:NM_001284245:exon7:c.G448A;p.D150N,SIPA1L1:NM_015556:exon7:c.G448A;p.D150N                                                           | 1.055 |          | 0.0002   | 7.68E-05 Fam55_f_m_aM_aM_dM     | 0/0;0/1;0/1;0/1;0/1     |
| chr14 | 71671187 | 71671187 | C    | G | SIPA1L1 | exonic   | nonsynonymous SNV   | SIPA1L1:NM_001284246:exon8:c.C2324G;p.P775R,SIPA1L1:NM_001284247:exon10:c.C2324G;p.P775R,SIPA1L1:NM_01354285:exon11:c.C2324G;p.P775R,SIPA1L1:NM_001354287:exon11:c.C2324G;p.P775R,SIPA1L1:NM_001354288:exon11:c.C2324G;p.P775R,SIPA1L1:NM_001354289:exon11:c.C842G;p.P281R,SIPA1L1:NM_001354286:exon12:c.C2324G;p.P775R,SIPA1L1:NM_001284245:exon13:c.C2324G;p.P775R,SIPA1L1:NM_015556:exon13:c.C2324G;p.P775R | 1.13  |          |          | Fam116_f_m_aM_aF                | 0/1;0/0;0/1;0/0         |

|       |          |          |   |   |         |        |                   |                                                                                                                                                                                                                                                                                                                                                                                                                                                                                                                                                                                                                                                                                                                                                                                                                                                                                                                                                                                                                                                                                                                                                                                                                                                                                                                                                                                                                                                                                  |       |          |              |             |                     |                     |
|-------|----------|----------|---|---|---------|--------|-------------------|----------------------------------------------------------------------------------------------------------------------------------------------------------------------------------------------------------------------------------------------------------------------------------------------------------------------------------------------------------------------------------------------------------------------------------------------------------------------------------------------------------------------------------------------------------------------------------------------------------------------------------------------------------------------------------------------------------------------------------------------------------------------------------------------------------------------------------------------------------------------------------------------------------------------------------------------------------------------------------------------------------------------------------------------------------------------------------------------------------------------------------------------------------------------------------------------------------------------------------------------------------------------------------------------------------------------------------------------------------------------------------------------------------------------------------------------------------------------------------|-------|----------|--------------|-------------|---------------------|---------------------|
| chr14 | 72536225 | 72536225 | C | T | RGS6    | exonic | nonsynonymous SNV | RG56:NM_001370286:exon14:c.C1108T;p.R370C,RG56:NM_001370294:exon14:c.C1081T;p.R361C,RG56:NM_001204419:exon15:c.C1207T;p.R403C,RG56:NM_001204420:exon15:c.C1207T;p.R403C,RG56:NM_001204421:exon15:c.C1207T;p.R403C,RG56:NM_001204422:exon15:c.C1207T;p.R403C,RG56:NM_001204423:exon15:c.C1213T;p.R405C,RG56:NM_001370280:exon15:c.C1192T;p.R398C,RG56:NM_001370283:exon15:c.C1207T;p.R403C,RG56:NM_001370292:exon15:c.C1207T;p.R403C,RG56:NM_001370293:exon15:c.C1207T;p.R403C,RG56:NM_001204416:exon16:c.C1318T;p.R440C,RG56:NM_001204417:exon16:c.C1318T;p.R440C,RG56:NM_001204418:exon16:c.C1318T;p.R440C,RG56:NM_001204424:exon16:c.C1318T;p.R440C,RG56:NM_001370270:exon16:c.C1318T;p.R440C,RG56:NM_001370271:exon16:c.C1318T;p.R440C,RG56:NM_001370272:exon16:c.C1318T;p.R440C,RG56:NM_001370273:exon16:c.C1318T;p.R440C,RG56:NM_001370274:exon16:c.C1318T;p.R440C,RG56:NM_001370275:exon16:c.C1318T;p.R440C,RG56:NM_001370276:exon16:c.C1318T;p.R440C,RG56:NM_001370277:exon16:c.C1318T;p.R440C,RG56:NM_001370278:exon16:c.C1318T;p.R440C,RG56:NM_001370279:exon16:c.C1309T;p.R437C,RG56:NM_001370281:exon16:c.C1318T;p.R440C,RG56:NM_001370282:exon16:c.C1318T;p.R440C,RG56:NM_001370284:exon16:c.C1318T;p.R440C,RG56:NM_001370287:exon16:c.C1318T;p.R440C,RG56:NM_001370288:exon16:c.C1318T;p.R440C,RG56:NM_001370289:exon16:c.C1318T;p.R440C,RG56:NM_001370290:exon16:c.C1318T;p.R440C,RG56:NM_001370291:exon16:c.C1318T;p.R440C,RG56:NM_004296:exon16:c.C1318T;p.R440C | 1.349 | 3.28E-05 | Fam75_f_m_aM | 0/1;0/0;0/1 |                     |                     |
| chr14 | 72753327 | 72753327 | G | A | DPF3    | exonic | nonsynonymous SNV | DPF3:NM_001280542:exon3:c.C238T;p.R80C,DPF3:NM_001280544:exon3:c.C403T;p.R135C,DPF3:NM_012074:exon3:c.C238T;p.R80C,DPF3:NM_001280543:exon4:c.C268T;p.R90C                                                                                                                                                                                                                                                                                                                                                                                                                                                                                                                                                                                                                                                                                                                                                                                                                                                                                                                                                                                                                                                                                                                                                                                                                                                                                                                        | 1.374 | 0.0006   | 9.01E-05     | 0.0001      | Fam15_f_m_aM_aM     | 0/1;0/0;0/1;0/1     |
| chr14 | 73103376 | 73103376 | G | A | RBM25   | exonic | nonsynonymous SNV | RBM25:NM_021239:exon10:c.G1052A;p.R351H                                                                                                                                                                                                                                                                                                                                                                                                                                                                                                                                                                                                                                                                                                                                                                                                                                                                                                                                                                                                                                                                                                                                                                                                                                                                                                                                                                                                                                          | 1.292 |          | 3.36E-05     |             | Fam60_f_m_aF        | 0/0;0/0;0/1         |
| chr14 | 73287209 | 73287209 | G | A | NUMB    | exonic | nonsynonymous SNV | NUMB:NM_001005745:exon8:c.C523T;p.R175W,NUMB:NM_003744:exon8:c.C523T;p.R175W,NUMB:NM_001005743:exon9:c.C556T;p.R186W,NUMB:NM_001005744:exon9:c.C556T;p.R186W,NUMB:NM_001320114:exon9:c.C556T;p.R186W                                                                                                                                                                                                                                                                                                                                                                                                                                                                                                                                                                                                                                                                                                                                                                                                                                                                                                                                                                                                                                                                                                                                                                                                                                                                             | 1.847 |          | 7.45E-05     |             | Fam115_f_m_aF_aM_aF | 0/1;0/0;0/0;0/1;0/0 |
| chr14 | 73738627 | 73738627 | G | T | ELMSAN1 | exonic | nonsynonymous SNV | ELMSAN1:NM_001043318:exon2:c.C1382A;p.S461Y,ELMSAN1:NM_001367710:exon2:c.C1382A;p.S461Y,ELMSAN1:NM_194278:exon2:c.C1382A;p.S461Y,ELMSAN1:NM_001043318:exon2:c.T863G;p.F288C,ELMSAN1:NM_001367710:exon2:c.T863G;p.F288C                                                                                                                                                                                                                                                                                                                                                                                                                                                                                                                                                                                                                                                                                                                                                                                                                                                                                                                                                                                                                                                                                                                                                                                                                                                           | 1.371 |          |              |             | Fam86_f_m_aF        | 0/0;0/1;0/1         |
| chr14 | 73739146 | 73739146 | A | C | ELMSAN1 | exonic | nonsynonymous SNV | ELMSAN1:NM_001367710:exon2:c.T863G;p.F288C,ELMSAN1:NM_194278:exon2:c.T863G;p.F288C                                                                                                                                                                                                                                                                                                                                                                                                                                                                                                                                                                                                                                                                                                                                                                                                                                                                                                                                                                                                                                                                                                                                                                                                                                                                                                                                                                                               | 1.364 | 0.0002   | 0.0008       | 0.0001      | Fam120_f_m_aM_aM    | 0/1;0/0;0/1;0/1     |
| chr14 | 74494896 | 74494896 | G | T | ISCA2   | exonic | nonsynonymous SNV | ISCA2:NM_194279:exon4:c.G361T;p.V121L                                                                                                                                                                                                                                                                                                                                                                                                                                                                                                                                                                                                                                                                                                                                                                                                                                                                                                                                                                                                                                                                                                                                                                                                                                                                                                                                                                                                                                            | 1.153 |          | 0.0001       | 9.77E-05    | Fam69_f_m_aM        | 0/0;0/1;0/1         |
| chr14 | 74674069 | 74674069 | G | A | AREL1   | exonic | nonsynonymous SNV | AREL1:NM_001039479:exon9:c.C1123T;p.R375C                                                                                                                                                                                                                                                                                                                                                                                                                                                                                                                                                                                                                                                                                                                                                                                                                                                                                                                                                                                                                                                                                                                                                                                                                                                                                                                                                                                                                                        | 1.11  |          | 9.86E-05     | 8.38E-05    | Fam92_f_m_aM_raM    | 0/0;0/1;0/1;0/0     |
| chr14 | 74817234 | 74817234 | G | T | YLP1M   | exonic | nonsynonymous SNV | YLP1M:NM_019589:exon15:c.G5903T;p.G1968V                                                                                                                                                                                                                                                                                                                                                                                                                                                                                                                                                                                                                                                                                                                                                                                                                                                                                                                                                                                                                                                                                                                                                                                                                                                                                                                                                                                                                                         | 1.555 |          | 7.24E-05     | 2.09E-05    | Fam91_m_aM_dM_aM_dM | 0/0;0/1;0/1;0/1;0/0 |
| chr14 | 76776177 | 76776177 | G | C | VASH1   | exonic | nonsynonymous SNV | VASH1:NM_014909:exon5:c.G816C;p.Q272H                                                                                                                                                                                                                                                                                                                                                                                                                                                                                                                                                                                                                                                                                                                                                                                                                                                                                                                                                                                                                                                                                                                                                                                                                                                                                                                                                                                                                                            | 1.463 |          |              | 6.98E-06    | Fam26_f_m_aM_uM     | 0/0;0/1;0/1;0/1     |
| chr14 | 77133828 | 77133828 | C | T | ZDHH22  | exonic | nonsynonymous SNV | ZDHH22:NM_001364172:exon3:c.G647A;p.R216H,ZDHH22:NM_174976:exon3:c.G647A;p.R216H                                                                                                                                                                                                                                                                                                                                                                                                                                                                                                                                                                                                                                                                                                                                                                                                                                                                                                                                                                                                                                                                                                                                                                                                                                                                                                                                                                                                 | 1.122 |          |              |             | Fam33_f_m_aM_uM     | 0/0;0/1;0/1;0/1     |
| chr14 | 77248804 | 77248804 | C | T | TMEM63C | exonic | nonsynonymous SNV | TMEM63C:NM_020431:exon20:c.C1802T;p.A601V                                                                                                                                                                                                                                                                                                                                                                                                                                                                                                                                                                                                                                                                                                                                                                                                                                                                                                                                                                                                                                                                                                                                                                                                                                                                                                                                                                                                                                        | 1.231 | 0.0002   | 6.46E-05     | 6.28E-05    | Fam112_f_m_aM       | 0/0;0/1;0/1         |
| chr14 | 78709371 | 78709371 | G | C | NRXN3   | exonic | nonsynonymous SNV | NRXN3:NM_004796:exon4:c.G257C;p.S86T,NRXN3:NM_001330195:exon7:c.G1376C;p.S459T,NRXN3:NM_001366425:exon7:c.G1376C;p.S459T,NRXN3:NM_001366426:exon8:c.G1388C;p.S463T,NRXN3:NM_004796:exon5:c.G703A;p.V235M,NRXN3:NM_001330195:exon8:c.G1822A;p.V608M,NRXN3:NM_001366425:exon8:c.G1822A;p.V608M,NRXN3:NM_001366426:exon9:c.G1834A;p.V612M                                                                                                                                                                                                                                                                                                                                                                                                                                                                                                                                                                                                                                                                                                                                                                                                                                                                                                                                                                                                                                                                                                                                           | 1.111 |          | 1.12E-05     | 6.98E-06    | Fam85_f_m_aM_aM     | 0/0;0/1;0/1;0/1     |
| chr14 | 78714917 | 78714917 | G | A | NRXN3   | exonic | nonsynonymous SNV | NRXN3:NM_004796:exon8:c.G1822A;p.V608M,NRXN3:NM_001366425:exon8:c.G1822A;p.V608M,NRXN3:NM_001366426:exon9:c.G1834A;p.V612M                                                                                                                                                                                                                                                                                                                                                                                                                                                                                                                                                                                                                                                                                                                                                                                                                                                                                                                                                                                                                                                                                                                                                                                                                                                                                                                                                       | 1.687 |          |              |             | Fam87_f_m_aM_uM     | 0/1;0/0;0/1;0/1     |
| chr14 | 78957260 | 78957260 | T | C | NRXN3   | exonic | nonsynonymous SNV | NRXN3:NM_004796:exon8:c.T1175C;p.L392S,NRXN3:NM_001330195:exon11:c.T2294C;p.L765S,NRXN3:NM_001366425:exon11:c.T2294C;p.L765S,NRXN3:NM_001366426:exon12:c.T2306C;p.L769S                                                                                                                                                                                                                                                                                                                                                                                                                                                                                                                                                                                                                                                                                                                                                                                                                                                                                                                                                                                                                                                                                                                                                                                                                                                                                                          | 1.959 |          |              | 6.98E-06    | Fam31_f_m_aM_uF     | 0/1;0/0;0/1;0/1     |
| chr14 | 78957262 | 78957262 | T | C | NRXN3   | exonic | nonsynonymous SNV | NRXN3:NM_004796:exon8:c.T1177C;p.Y393H,NRXN3:NM_001330195:exon11:c.T2296C;p.Y766H,NRXN3:NM_001366425:exon11:c.T2296C;p.Y766H,NRXN3:NM_001366426:exon12:c.T2308C;p.Y770H                                                                                                                                                                                                                                                                                                                                                                                                                                                                                                                                                                                                                                                                                                                                                                                                                                                                                                                                                                                                                                                                                                                                                                                                                                                                                                          | 1.898 |          |              |             | Fam28_f_m_aF_uF     | 0/0;0/1;0/1;0/0     |
| chr14 | 78966073 | 78966073 | C | T | NRXN3   | exonic | nonsynonymous SNV | NRXN3:NM_004796:exon9:c.C1325T;p.T442M,NRXN3:NM_001330195:exon12:c.C2444T;p.T815M,NRXN3:NM_001366425:exon12:c.C2444T;p.T815M,NRXN3:NM_001366426:exon13:c.C2456T;p.T819M                                                                                                                                                                                                                                                                                                                                                                                                                                                                                                                                                                                                                                                                                                                                                                                                                                                                                                                                                                                                                                                                                                                                                                                                                                                                                                          | 1.697 |          | 0.0002       | 2.79E-05    | Fam121_f_m_aF_aM    | 0/0;0/1;0/1;0/1     |
| chr14 | 78967269 | 78967269 | C | T | NRXN3   | exonic | nonsynonymous SNV | NRXN3:NM_004796:exon10:c.C1720T;p.R574C,NRXN3:NM_001330195:exon13:c.C2839T;p.R947C,NRXN3:NM_001366425:exon13:c.C2839T;p.R947C,NRXN3:NM_001366426:exon14:c.C2851T;p.R951C                                                                                                                                                                                                                                                                                                                                                                                                                                                                                                                                                                                                                                                                                                                                                                                                                                                                                                                                                                                                                                                                                                                                                                                                                                                                                                         | 1.942 |          | 6.56E-05     | 2.10E-05    | Fam106_f_m_aM       | 0/1;0/0;0/1         |
| chr14 | 81487891 | 81487891 | C | T | SEL1L   | exonic | nonsynonymous SNV | SEL1L:NM_005065:exon15:c.G1447A;p.V483M                                                                                                                                                                                                                                                                                                                                                                                                                                                                                                                                                                                                                                                                                                                                                                                                                                                                                                                                                                                                                                                                                                                                                                                                                                                                                                                                                                                                                                          | 1.256 | 7.34E-05 | 6.17E-05     | 6.98E-06    | Fam96_f_m_aM_uF     | 0/0;0/1;0/1;0/0     |
| chr14 | 88517219 | 88517219 | G | A | PTPN21  | exonic | nonsynonymous SNV | PTPN21:NM_007039:exon3:c.C223T;p.R75C                                                                                                                                                                                                                                                                                                                                                                                                                                                                                                                                                                                                                                                                                                                                                                                                                                                                                                                                                                                                                                                                                                                                                                                                                                                                                                                                                                                                                                            | 1.135 | 0.0003   | 0.0004       | 0.0001      | Fam118_f_m_aM_aF_uM | 0/1;0/0;0/1;0/1;0/0 |

|       |           |           |   |    |           |        |                      |                                                                                                                                                                                                                                                                                                                                                                                                                                                                                                                                                                                                                                                        |       |          |          |          |                        |                         |
|-------|-----------|-----------|---|----|-----------|--------|----------------------|--------------------------------------------------------------------------------------------------------------------------------------------------------------------------------------------------------------------------------------------------------------------------------------------------------------------------------------------------------------------------------------------------------------------------------------------------------------------------------------------------------------------------------------------------------------------------------------------------------------------------------------------------------|-------|----------|----------|----------|------------------------|-------------------------|
| chr14 | 91234368  | 91234368  | C | T  | GPR68     | exonic | nonsynonymous SNV    | GPR68:NM_001177676:exon2:c.G683A:p.R228Q,GPR68:NM_003485:exon2:c.G683A:p.R228Q,GPR68:NM_001348437:exon3:c.G683A:p.R228Q                                                                                                                                                                                                                                                                                                                                                                                                                                                                                                                                | 1.079 | 0.0001   | 0.0001   | 8.37E-05 | Fam72_f_m_aF_uF        | 0/1;0/0;0/1;0/0         |
| chr14 | 91475932  | 91475932  | G | A  | PPP4R3A   | exonic | nonsynonymous SNV    | PPP4R3A:NM_001284281:exon5:c.C428T:p.T1431,PPP4R3A:NM_001284280:exon7:c.C1145T:p.T3821,PPP4R3A:NM_001366432:exon7:c.C1145T:p.T3821                                                                                                                                                                                                                                                                                                                                                                                                                                                                                                                     | 1.716 |          | 1.14E-05 | 2.10E-05 | Fam68_f_m_aF_uF_uM     | 0/0;0/1;0/1;0/1;0/0     |
| chr14 | 91937063  | 91937063  | - | CC | FBLN5     | exonic | frameshift insertion | FBLN5:NM_006329:exon4:c.262_263insGG:p.Y88Wfs*81                                                                                                                                                                                                                                                                                                                                                                                                                                                                                                                                                                                                       | 0.581 |          |          |          | Fam89_f_m_aM           | 0/0;0/1;0/1             |
| chr14 | 91937064  | 91937064  | A | C  | FBLN5     | exonic | nonsynonymous SNV    | FBLN5:NM_006329:exon4:c.T262G:p.Y88D                                                                                                                                                                                                                                                                                                                                                                                                                                                                                                                                                                                                                   | 1.245 |          |          |          | Fam89_f_m_aM           | 0/0;0/1;0/1             |
| chr14 | 92993993  | 92993993  | T | C  | ITPK1     | exonic | nonsynonymous SNV    | ITPK1:NM_001142593:exon5:c.A251G:p.Y84C,ITPK1:NM_01142594:exon5:c.A251G:p.Y84C,ITPK1:NM_014216:exon5:c.A251G:p.Y84C                                                                                                                                                                                                                                                                                                                                                                                                                                                                                                                                    | 1.458 |          |          |          | Fam122_f_m_aM          | 0/0;0/1;0/1             |
| chr14 | 93571980  | 93571980  | T | A  | UNC79     | exonic | nonsynonymous SNV    | UNC79:NM_001346218:exon15:c.T1842A:p.N614K,UNC79:NM_020818:exon15:c.T1311A:p.N437K                                                                                                                                                                                                                                                                                                                                                                                                                                                                                                                                                                     | 1.152 |          |          |          | Fam113_f_m_aF_raM_uF   | 0/1;0/0;0/1;0/0;0/1     |
| chr14 | 93939434  | 93939434  | G | T  | ASB2      | exonic | nonsynonymous SNV    | ASB2:NM_016150:exon6:c.C1147A:p.L383M,ASB2:NM_001202429:exon8:c.C1291A:p.L431M                                                                                                                                                                                                                                                                                                                                                                                                                                                                                                                                                                         | 2.181 |          |          | 1.40E-05 | Fam78_f_m_aF_uM        | 0/0;0/1;0/1;0/1         |
| chr14 | 99398996  | 99398996  | G | A  | SETD3     | exonic | nonsynonymous SNV    | SETD3:NM_032233:exon13:c.C1468T:p.R490C                                                                                                                                                                                                                                                                                                                                                                                                                                                                                                                                                                                                                | 1.108 | 7.34E-05 | 0.0006   | 0.0001   | Fam54_f_m_aM_uF        | 0/0;0/1;0/1;0/1         |
| chr14 | 99399086  | 99399086  | G | A  | SETD3     | exonic | nonsynonymous SNV    | SETD3:NM_032233:exon13:c.C1378T:p.R460C                                                                                                                                                                                                                                                                                                                                                                                                                                                                                                                                                                                                                | 1.339 | 0.0001   | 9.11E-05 | 4.89E-05 | Fam62_f_m_aM_aM        | 0/1;0/0;0/1;0/0         |
| chr14 | 100123554 | 100123554 | G | A  | EVL       | exonic | nonsynonymous SNV    | EVL:NM_001330221:exon4:c.G368A:p.R123H,EVL:NM_016337:exon4:c.G374A:p.R125H                                                                                                                                                                                                                                                                                                                                                                                                                                                                                                                                                                             | 1.324 |          | 5.59E-05 | 4.19E-05 | Fam40_f_m_aM_aM        | 0/0;0/1;0/1;0/1         |
| chr14 | 100123554 | 100123554 | G | A  | EVL       | exonic | nonsynonymous SNV    | EVL:NM_001330221:exon4:c.G368A:p.R123H,EVL:NM_016337:exon4:c.G374A:p.R125H                                                                                                                                                                                                                                                                                                                                                                                                                                                                                                                                                                             | 1.324 |          | 5.59E-05 | 4.19E-05 | Fam64_f_m_aM           | 0/1;0/0;0/1             |
| chr14 | 100538718 | 100538718 | C | G  | BEGAIN    | exonic | nonsynonymous SNV    | BEGAIN:NM_001159531:exon6:c.G1033C:p.G345R,BEGAIN:NM_020836:exon7:c.G1033C:p.G345R                                                                                                                                                                                                                                                                                                                                                                                                                                                                                                                                                                     | 1.101 |          |          |          | Fam56_f_m_aF_aM        | 0/0;0/1;0/1;0/0         |
| chr14 | 100538723 | 100538723 | T | C  | BEGAIN    | exonic | nonsynonymous SNV    | BEGAIN:NM_001159531:exon6:c.A1028G:p.Y343C,BEGAIN:NM_020836:exon7:c.A1028G:p.Y343C                                                                                                                                                                                                                                                                                                                                                                                                                                                                                                                                                                     | 1.346 |          | 4.48E-05 | 1.40E-05 | Fam36_f_m_aM_uM        | 0/0;0/1;0/1;0/1         |
| chr14 | 100883646 | 100883646 | C | A  | RTL1      | exonic | nonsynonymous SNV    | RTL1:NM_001134888:exon1:c.G1143T:p.W381C                                                                                                                                                                                                                                                                                                                                                                                                                                                                                                                                                                                                               | 1.847 |          | 9.70E-05 | 9.79E-05 | Fam4_f_m_aM            | 0/1;0/0;0/1             |
| chr14 | 100884710 | 100884710 | C | T  | RTL1      | exonic | nonsynonymous SNV    | RTL1:NM_001134888:exon1:c.G79A:p.E27K                                                                                                                                                                                                                                                                                                                                                                                                                                                                                                                                                                                                                  | 1.674 | 7.35E-05 | 9.85E-05 | 9.08E-05 | Fam91_m_aM_dM_aM_dM    | 0/0;0/1;0/1;0/0;0/0     |
| chr14 | 101988838 | 101988838 | G | C  | DYNC1H1   | exonic | nonsynonymous SNV    | DYNC1H1:NM_001376:exon10:c.G2854C:p.E952Q                                                                                                                                                                                                                                                                                                                                                                                                                                                                                                                                                                                                              | 1.181 |          |          |          | Fam122_f_m_aM          | 0/0;0/1;0/1             |
| chr14 | 102016376 | 102016376 | T | C  | DYNC1H1   | exonic | nonsynonymous SNV    | DYNC1H1:NM_001376:exon37:c.T7501C:p.S2501P                                                                                                                                                                                                                                                                                                                                                                                                                                                                                                                                                                                                             | 2.521 |          |          |          | Fam122_f_m_aM          | 0/0;0/0;0/1             |
| chr14 | 102026607 | 102026607 | G | A  | DYNC1H1   | exonic | nonsynonymous SNV    | DYNC1H1:NM_001376:exon44:c.G8671A:p.D2891N                                                                                                                                                                                                                                                                                                                                                                                                                                                                                                                                                                                                             | 1.739 |          |          |          | Fam97_f_m_aM_aF        | 0/1;0/0;0/1;0/1         |
| chr14 | 102042720 | 102042720 | G | T  | DYNC1H1   | exonic | nonsynonymous SNV    | DYNC1H1:NM_001376:exon69:c.G12485T:p.S4162I                                                                                                                                                                                                                                                                                                                                                                                                                                                                                                                                                                                                            | 1.415 |          | 1.12E-05 |          | Fam119_f_m_aM_aM       | 0/0;0/1;0/0;0/1         |
| chr14 | 102438034 | 102438034 | T | C  | TECPR2    | exonic | nonsynonymous SNV    | TECPR2:NM_001172631:exon10:c.T2407C:p.W803R,TECPR2:NM_014844:exon10:c.T2407C:p.W803R                                                                                                                                                                                                                                                                                                                                                                                                                                                                                                                                                                   | 1.394 |          | 1.12E-05 |          | Fam77_f_m_aM_aF_uM_uFs | 0/1;0/0;0/1;0/1;0/1;0/0 |
| chr14 | 102450629 | 102450629 | C | A  | TECPR2    | exonic | nonsynonymous SNV    | TECPR2:NM_001172631:exon15:c.C3386A:p.S1129Y,TECPR2:NM_014844:exon15:c.C3386A:p.S1129Y                                                                                                                                                                                                                                                                                                                                                                                                                                                                                                                                                                 | 1.064 | 0.0001   | 0.0006   | 0.0003   | Fam115_f_m_aF_aM_aF    | 0/0;0/1;0/0;0/1;0/1     |
| chr14 | 102507549 | 102507549 | C | A  | ANKRD9    | exonic | nonsynonymous SNV    | ANKRD9:NM_001348652:exon3:c.G341T:p.G114V,ANKRD9:NM_001348651:exon4:c.G341T:p.G114V,ANKRD9:NM_152326:exon4:c.G341T:p.G114V                                                                                                                                                                                                                                                                                                                                                                                                                                                                                                                             | 1.822 | 0.0003   |          | 6.37E-05 | Fam2_f_m_aF            | 0/1;0/0;0/1             |
| chr14 | 102945689 | 102945689 | G | A  | CDC42BPB  | exonic | nonsynonymous SNV    | CDC42BPB:NM_006035:exon29:c.C3784T:p.L1262F                                                                                                                                                                                                                                                                                                                                                                                                                                                                                                                                                                                                            | 1.335 |          | 0.0003   | 0.0001   | Fam39_f_m_aM           | 0/1;0/0;0/1             |
| chr14 | 102972016 | 102972016 | C | T  | CDC42BPB  | exonic | nonsynonymous SNV    | CDC42BPB:NM_006035:exon13:c.G1787A:p.R596Q                                                                                                                                                                                                                                                                                                                                                                                                                                                                                                                                                                                                             | 1.374 | 7.35E-05 | 3.28E-05 | 2.09E-05 | Fam108_f_m_aM          | 0/1;0/0;0/1             |
| chr14 | 102983706 | 102983706 | G | C  | CDC42BPB  | exonic | nonsynonymous SNV    | CDC42BPB:NM_006035:exon7:c.C741G:p.I247M                                                                                                                                                                                                                                                                                                                                                                                                                                                                                                                                                                                                               | 2.492 |          |          |          | Fam92_f_m_aM_raM       | 0/0;0/0;0/0;0/1         |
| chr14 | 103521318 | 103521318 | G | A  | CKB       | exonic | nonsynonymous SNV    | CKB:NM_001362531:exon4:c.C670T:p.P224S,CKB:NM_001823:exon5:c.C598T:p.P200S                                                                                                                                                                                                                                                                                                                                                                                                                                                                                                                                                                             | 1.474 | 7.35E-05 |          | 6.98E-06 | Fam13_f_m_aM           | 0/1;0/0;0/1             |
| chr14 | 103740147 | 103740147 | C | A  | PPP1R13B  | exonic | nonsynonymous SNV    | PPP1R13B:NM_015316:exon12:c.G2269T:p.D757Y                                                                                                                                                                                                                                                                                                                                                                                                                                                                                                                                                                                                             | 1.305 |          |          |          | Fam82_f_m_aM_uF        | 0/0;0/1;0/1;0/0         |
| chr14 | 103749910 | 103749910 | G | C  | PPP1R13B  | exonic | nonsynonymous SNV    | PPP1R13B:NM_015316:exon8:c.C853G:p.Q285E                                                                                                                                                                                                                                                                                                                                                                                                                                                                                                                                                                                                               | 1.224 |          | 8.99E-05 | 4.19E-05 | Fam68_f_m_aF_uF_uM     | 0/1;0/0;0/1;0/1;0/1     |
| chr14 | 105529754 | 105529754 | C | T  | TMEM121   | exonic | nonsynonymous SNV    | TMEM121:NM_001331238:exon2:c.C920T:p.P307L,TMEM121:NM_025268:exon2:c.C920T:p.P307L                                                                                                                                                                                                                                                                                                                                                                                                                                                                                                                                                                     | 1.219 |          | 0.0001   | 5.58E-05 | Fam115_f_m_aF_aM_aF    | 0/1;0/0;0/0;0/0;0/1     |
| chr15 | 23686343  | 23686343  | G | C  | NDN       | exonic | nonsynonymous SNV    | NDN:NM_002487:exon1:c.C875G:p.S292C                                                                                                                                                                                                                                                                                                                                                                                                                                                                                                                                                                                                                    | 1.509 |          |          |          | Fam62_f_m_aM_aM        | 0/0;0/1;0/1;0/0         |
| chr15 | 24976412  | 24976412  | A | G  | SNRPN     | exonic | nonsynonymous SNV    | SNRPN:NM_001349464:exon6:c.A263G:p.K88R,SNRPN:NM_003097:exon6:c.A263G:p.K88R,SNRPN:NM_001349463:exon7:c.A263G:p.K88R,SNRPN:NM_001349465:exon7:c.A263G:p.K88R,SNRPN:NM_001349459:exon8:c.A263G:p.K88R,SNRPN:NM_022805:exon8:c.A263G:p.K88R,SNRPN:NM_022808:exon8:c.A263G:p.K88R,SNRPN:NM_001349455:exon9:c.A263G:p.K88R,SNRPN:NM_001349456:exon9:c.A263G:p.K88R,SNRPN:NM_001349458:exon9:c.A263G:p.K88R,SNRPN:NM_001349461:exon9:c.A263G:p.K88R,SNRPN:NM_001349462:exon9:c.A263G:p.K88R,SNRPN:NM_022807:exon9:c.A263G:p.K88R,SNRPN:NM_001349454:exon10:c.A263G:p.K88R,SNRPN:NM_001349457:exon10:c.A263G:p.K88R,SNRPN:NM_001349460:exon11:c.A263G:p.K88R | 1.091 |          |          |          | Fam40_f_m_aM_aM        | 0/0;0/1;0/1;0/0         |
| chr15 | 25863014  | 25863014  | C | T  | ATP10A    | exonic | nonsynonymous SNV    | ATP10A:NM_024490:exon1:c.G83A:p.R28H                                                                                                                                                                                                                                                                                                                                                                                                                                                                                                                                                                                                                   | 1.651 |          |          |          | Fam12_f_m_aM_uM_aM     | 0/1;0/0;0/1;0/1;0/0     |
| chr15 | 28113577  | 28113577  | G | A  | HERC2     | exonic | nonsynonymous SNV    | HERC2:NM_004667:exon91:c.C14015T:p.T4672M                                                                                                                                                                                                                                                                                                                                                                                                                                                                                                                                                                                                              | 1.759 | 7.34E-05 | 0.0003   | 0.0001   | Fam101_f_m_aM          | 0/0;0/1;0/1             |
| chr15 | 28141791  | 28141791  | T | C  | HERC2     | exonic | nonsynonymous SNV    | HERC2:NM_004667:exon77:c.A11756G:p.H3919R                                                                                                                                                                                                                                                                                                                                                                                                                                                                                                                                                                                                              | 1.957 |          |          | 6.98E-06 | Fam9_f_m_aM_dM_uF      | 0/1;0/0;0/1;0/0;0/1     |
| chr15 | 28142369  | 28142369  | G | C  | HERC2     | exonic | nonsynonymous SNV    | HERC2:NM_004667:exon76:c.C11569G:p.L3857V                                                                                                                                                                                                                                                                                                                                                                                                                                                                                                                                                                                                              | 1.735 |          |          |          | Fam22_f_m_aF_aF_uF     | 0/1;0/0;0/1;0/1;0/1     |
| chr15 | 28144801  | 28144801  | C | A  | HERC2     | exonic | nonsynonymous SNV    | HERC2:NM_004667:exon72:c.G11012T:p.R3671L                                                                                                                                                                                                                                                                                                                                                                                                                                                                                                                                                                                                              | 2.008 |          |          |          | Fam123_f_aF            | 0/0;0/1                 |
| chr15 | 28238731  | 28238731  | C | A  | HERC2     | exonic | nonsynonymous SNV    | HERC2:NM_004667:exon24:c.G3619T:p.V1207L                                                                                                                                                                                                                                                                                                                                                                                                                                                                                                                                                                                                               | 1.165 |          | 2.24E-05 |          | Fam24_f_m_aM_aM        | 0/0;0/1;0/1;0/0         |
| chr15 | 29268926  | 29268926  | C | G  | NSMCE3    | exonic | nonsynonymous SNV    | NSMCE3:NM_138704:exon1:c.G780C:p.K260N                                                                                                                                                                                                                                                                                                                                                                                                                                                                                                                                                                                                                 | 1.399 |          |          |          | Fam76_f_m_aM_uM        | 0/0;0/1;0/1;0/1         |
| chr15 | 30633569  | 30633569  | C | T  | ARHGAP11B | exonic | nonsynonymous SNV    | ARHGAP11B:NM_001039841:exon3:c.C280T:p.R94C                                                                                                                                                                                                                                                                                                                                                                                                                                                                                                                                                                                                            | 1.58  |          | 5.60E-05 | 6.99E-05 | Fam44_f_m_aM_uF        | 0/0;0/1;0/1;0/0         |



|       |          |          |   |   |               |        |                      |                                                                                                                                                                                                                                                                                                                                                                                                                                                |       |          |          |                      |                      |                     |
|-------|----------|----------|---|---|---------------|--------|----------------------|------------------------------------------------------------------------------------------------------------------------------------------------------------------------------------------------------------------------------------------------------------------------------------------------------------------------------------------------------------------------------------------------------------------------------------------------|-------|----------|----------|----------------------|----------------------|---------------------|
| chr15 | 32616250 | 32616250 | G | T | ARHGAP11A;ARH | exonic | nonsynonymous SNV    | ARHGAP11A-<br>SCG5:NM_001368319:exon1:c.G39T:p.Q13H,ARHGAP11A:<br>NM_014783:exon1:c.G39T:p.Q13H,ARHGAP11A:NM_1993<br>57:exon1:c.G39T:p.Q13H                                                                                                                                                                                                                                                                                                    | 2.284 | 0.0001   | 4.19E-05 | Fam11_f_m_aM_uM      | 0/1;0/0;0/1;0/0      |                     |
| chr15 | 34103574 | 34103574 | C | A | PGBD4         | exonic | nonsynonymous SNV    | PGBD4:NM_152595:exon1:c.C1043A:p.T348N<br>SLC12A6:NM_001042497:exon15:c.G2013A:p.M6711,SLC12<br>A6:NM_005135:exon16:c.G1905A:p.M6351,SLC12A6:NM_1<br>33647:exon16:c.G2058A:p.M6861,SLC12A6:NM_00104249<br>4:exon17:c.G1881A:p.M6271,SLC12A6:NM_001042495:exo<br>n17:c.G1881A:p.M6271,SLC12A6:NM_001042496:exon17:c.<br>G2031A:p.M6771,SLC12A6:NM_001365088:exon17:c.G205<br>8A:p.M6861                                                         | 1.311 | 7.82E-05 | 2.10E-05 | Fam48_f_m_aM_uM      | 0/0;0/1;0/1;0/1      |                     |
| chr15 | 34242206 | 34242206 | C | T | SLC12A6       | exonic | nonsynonymous SNV    | SLC12A6:NM_001042497:exon15:c.G2013A:p.M6711,SLC12<br>A6:NM_005135:exon16:c.G1905A:p.M6351,SLC12A6:NM_1<br>33647:exon16:c.G2058A:p.M6861,SLC12A6:NM_00104249<br>4:exon17:c.G1881A:p.M6271,SLC12A6:NM_001042495:exo<br>n17:c.G1881A:p.M6271,SLC12A6:NM_001042496:exon17:c.<br>G2031A:p.M6771,SLC12A6:NM_001365088:exon17:c.G205<br>8A:p.M6861                                                                                                   | 1.143 |          |          | Fam108_f_m_aM        | 0/0;0/1;0/1          |                     |
| chr15 | 34365142 | 34365142 | C | T | LPCAT4        | exonic | nonsynonymous SNV    | LPCAT4:NM_153613:exon3:c.G344A:p.R115Q                                                                                                                                                                                                                                                                                                                                                                                                         | 1.799 | 0.0006   | 0.0001   | 6.98E-06             | Fam25_f_m_aM         | 0/1;0/0;0/1         |
| chr15 | 38299531 | 38299531 | G | A | SPRED1        | exonic | nonsynonymous SNV    | SPRED1:NM_152594:exon2:c.G191A:p.R64Q<br>RASGRP1:NM_001128602:exon9:c.T1159C:p.Y387H,RASGR<br>P1:NM_001306086:exon9:c.T1159C:p.Y387H,RASGRP1:NM<br>005739:exon9:c.T1159C:p.Y387H                                                                                                                                                                                                                                                               | 1.189 |          |          | Fam32_f_m_aM_uM      | 0/0;0/1;0/1;0/0      |                     |
| chr15 | 38507809 | 38507809 | A | G | RASGRP1       | exonic | nonsynonymous SNV    | RASGRP1:NM_001128602:exon9:c.T1159C:p.Y387H,RASGR<br>P1:NM_001306086:exon9:c.T1159C:p.Y387H,RASGRP1:NM<br>005739:exon9:c.T1159C:p.Y387H                                                                                                                                                                                                                                                                                                        | 1.146 | 7.35E-05 | 0.0002   | 8.38E-05             | Fam123_f_aF          | 0/0;0/1             |
| chr15 | 39592745 | 39592745 | C | T | THBS1         | exonic | nonsynonymous SNV    | THBS1:NM_003246:exon17:c.C2710T:p.P904S                                                                                                                                                                                                                                                                                                                                                                                                        | 1.303 |          |          | Fam42_f_m_aM_uF      | 0/0;0/1;0/1;0/0      |                     |
| chr15 | 40367062 | 40367062 | G | A | DISP2         | exonic | nonsynonymous SNV    | DISP2:NM_033510:exon8:c.G950A:p.R317H                                                                                                                                                                                                                                                                                                                                                                                                          | 1.334 | 0.0003   | 0.0002   | 0.0001               | Fam32_f_m_aM_uM      | 0/1;0/0;0/1;0/0     |
| chr15 | 40369548 | 40369548 | C | T | DISP2         | exonic | nonsynonymous SNV    | DISP2:NM_033510:exon8:c.C3436T:p.R1146C                                                                                                                                                                                                                                                                                                                                                                                                        | 1.305 |          | 0.0003   | 1.40E-05             | Fam22_f_m_aF_aF_uF   | 0/1;0/0;0/1;0/1;0/0 |
| chr15 | 40472009 | 40472009 | T | C | CHST14        | exonic | nonsynonymous SNV    | CHST14:NM_130468:exon1:c.T796C:p.Y266H                                                                                                                                                                                                                                                                                                                                                                                                         | 1.765 | 0.0002   | 7.46E-05 | 8.37E-05             | Fam19_f_m_aM         | 0/0;0/1;0/1         |
| chr15 | 40931610 | 40931610 | C | T | DLL4          | exonic | nonsynonymous SNV    | DLL4:NM_019074:exon4:c.C502T:p.R168C                                                                                                                                                                                                                                                                                                                                                                                                           | 2.555 |          |          |                      | Fam36_f_m_aM_uM      | 0/0;0/1;0/1;0/0     |
| chr15 | 40936645 | 40936645 | G | A | DLL4          | exonic | nonsynonymous SNV    | DLL4:NM_019074:exon9:c.G1658A:p.R553Q                                                                                                                                                                                                                                                                                                                                                                                                          | 1.138 | 0.0001   | 9.48E-05 | 7.68E-05             | Fam113_f_m_aF_raM_uF | 0/0;0/1;0/1;0/0;0/1 |
| chr15 | 41573715 | 41573715 | C | T | TYRO3         | exonic | nonsynonymous SNV    | TYRO3:NM_001330264:exon18:c.C2047T:p.R683C,TYRO3:<br>NM_006293:exon18:c.C2182T:p.R728C                                                                                                                                                                                                                                                                                                                                                         | 1.019 |          | 4.47E-05 | 6.98E-05             | Fam24_f_m_aM_aM      | 0/1;0/0;0/1;0/1     |
| chr15 | 41900716 | 41900716 | C | T | EHD4          | exonic | nonsynonymous SNV    | EHD4:NM_139265:exon6:c.G1555A:p.E519K<br>TP53BP1:NM_001141979:exon21:c.C4327T:p.R1443C,TP53<br>BP1:NM_001141980:exon21:c.C4327T:p.R1443C,TP53BP1:<br>NM_005657:exon21:c.C4312T:p.R1438C,TP53BP1:NM_001<br>355001:exon22:c.C1447T:p.R483C<br>TP53BP1:NM_001141979:exon20:c.C4228T:p.P1410S,TP53<br>BP1:NM_001141980:exon20:c.C4228T:p.P1410S,TP53BP1:<br>NM_005657:exon20:c.C4213T:p.P14055,TP53BP1:NM_001<br>355001:exon21:c.C1348T:p.P450S    | 1.071 |          | 3.28E-05 | Fam19_f_m_aM         | 0/0;0/1;0/1          |                     |
| chr15 | 43420659 | 43420659 | G | A | TP53BP1       | exonic | nonsynonymous SNV    | TP53BP1:NM_001141979:exon21:c.C4327T:p.R1443C,TP53<br>BP1:NM_001141980:exon21:c.C4327T:p.R1443C,TP53BP1:<br>NM_005657:exon21:c.C4312T:p.R1438C,TP53BP1:NM_001<br>355001:exon22:c.C1447T:p.R483C<br>TP53BP1:NM_001141979:exon20:c.C4228T:p.P1410S,TP53<br>BP1:NM_001141980:exon20:c.C4228T:p.P1410S,TP53BP1:<br>NM_005657:exon20:c.C4213T:p.P14055,TP53BP1:NM_001<br>355001:exon21:c.C1348T:p.P450S                                             | 1.999 |          |          | Fam15_f_m_aM_aM      | 0/0;0/1;0/1;0/0      |                     |
| chr15 | 43421047 | 43421047 | G | A | TP53BP1       | exonic | nonsynonymous SNV    | TP53BP1:NM_001141979:exon21:c.C4327T:p.R1443C,TP53<br>BP1:NM_001141980:exon21:c.C4327T:p.R1443C,TP53BP1:<br>NM_005657:exon21:c.C4312T:p.R1438C,TP53BP1:NM_001<br>355001:exon22:c.C1447T:p.R483C<br>TP53BP1:NM_001141979:exon20:c.C4228T:p.P1410S,TP53<br>BP1:NM_001141980:exon20:c.C4228T:p.P1410S,TP53BP1:<br>NM_005657:exon20:c.C4213T:p.P14055,TP53BP1:NM_001<br>355001:exon21:c.C1348T:p.P450S                                             | 1.72  |          | 3.30E-05 | Fam110_f_m_aM_aM_uMs | 0/0;0/1;0/1;0/1;0/0  |                     |
| chr15 | 43793080 | 43793080 | A | G | SERF2         | exonic | nonsynonymous SNV    | SERF2:NM_001018108:exon2:c.A113G:p.Q38R,SERF2:NM_<br>001199875:exon2:c.A113G:p.Q38R,SERF2:NM_001199876:<br>exon2:c.A113G:p.Q38R,SERF2:NM_001199878:exon2:c.A7<br>1G:p.Q24R,SERF2:NM_001199877:exon4:c.A113G:p.Q38R<br>FRMD5:NM_001322951:exon5:c.G400A:p.E134K,FRMD5:N<br>M_001322949:exon6:c.G505A:p.E169K,FRMD5:NM_00132<br>2950:exon6:c.G505A:p.E169K,FRMD5:NM_032892:exon6:c<br>.G505A:p.E169K,FRMD5:NM_001286490:exon7:c.G238A:p.<br>E80K | 1.687 | 0.0001   |          | 6.98E-06             | Fam66_f_m_aM         | 0/1;0/0;0/1         |
| chr15 | 43905874 | 43905874 | C | T | FRMD5         | exonic | nonsynonymous SNV    | FRMD5:NM_001322951:exon5:c.G400A:p.E134K,FRMD5:N<br>M_001322949:exon6:c.G505A:p.E169K,FRMD5:NM_00132<br>2950:exon6:c.G505A:p.E169K,FRMD5:NM_032892:exon6:c<br>.G505A:p.E169K,FRMD5:NM_001286490:exon7:c.G238A:p.<br>E80K                                                                                                                                                                                                                       | 2.065 | 0.0006   | 0.0008   | 0.0005               | Fam77_f_m_aM_aF      | 0/1;0/0;0/0;0/1     |
| chr15 | 44403030 | 44403030 | G | A | CASC4         | exonic | nonsynonymous SNV    | CASC4:NM_138423:exon9:c.G1216A:p.D406N                                                                                                                                                                                                                                                                                                                                                                                                         | 1.261 |          |          |                      | Fam95_f_m_aM_aM_uF   | 0/0;0/1;0/1;0/1;0/1 |
| chr15 | 45160849 | 45160849 | G | A | DUOX1         | exonic | nonsynonymous SNV    | DUOX1:NM_175940:exon29:c.G3715A:p.G1239S,DUOX1:N<br>M_017434:exon30:c.G3715A:p.G1239S                                                                                                                                                                                                                                                                                                                                                          | 1.013 | 7.35E-05 |          | 6.98E-06             | Fam75_f_m_aM         | 0/0;0/1;0/1         |
| chr15 | 47763853 | 47763853 | G | A | SEMA6D        | exonic | nonsynonymous SNV    | SEMA6D:NM_001358351:exon10:c.G751A:p.V251M,SEMA<br>6D:NM_001358352:exon10:c.G751A:p.V251M,SEMA6D:N<br>M_020858:exon10:c.G751A:p.V251M,SEMA6D:NM_02496<br>6:exon10:c.G751A:p.V251M,SEMA6D:NM_153616:exon10:<br>c.G751A:p.V251M,SEMA6D:NM_153617:exon10:c.G751A:<br>p.V251M,SEMA6D:NM_153618:exon10:c.G751A:p.V251M,<br>SEMA6D:NM_153619:exon10:c.G751A:p.V251M,SEMA6D:<br>NM_001198999:exon13:c.G751A:p.V251M                                   | 1.127 | 0.0006   | 0.0007   | 0.0004               | Fam4_f_m_aM          | 0/0;0/1;0/1         |
| chr15 | 47764025 | 47764025 | G | A | SEMA6D        | exonic | nonsynonymous SNV    | SEMA6D:NM_001358351:exon10:c.G923A:p.G308D,SEMA<br>6D:NM_001358352:exon10:c.G923A:p.G308D,SEMA6D:N<br>M_020858:exon10:c.G923A:p.G308D,SEMA6D:NM_02496<br>6:exon10:c.G923A:p.G308D,SEMA6D:NM_153616:exon10:<br>c.G923A:p.G308D,SEMA6D:NM_153617:exon10:c.G923A:p<br>.G308D,SEMA6D:NM_153618:exon10:c.G923A:p.G308D,SE<br>MA6D:NM_153619:exon10:c.G923A:p.G308D,SEMA6D:NM<br>_001198999:exon13:c.G923A:p.G308D                                   | 1.913 |          | 1.12E-05 |                      | Fam78_f_m_aF_uM      | 0/0;0/1;0/1;0/0     |
| chr15 | 48427606 | 48427606 | G | A | FBN1          | exonic | nonsynonymous SNV    | FBN1:NM_000138:exon58:c.C7165T:p.L2389F                                                                                                                                                                                                                                                                                                                                                                                                        | 1.39  |          |          |                      | Fam72_f_m_aF_uF      | 0/0;0/1;0/1;0/0     |
| chr15 | 48515404 | 48515404 | A | G | FBN1          | exonic | nonsynonymous SNV    | FBN1:NM_000138:exon12:c.T1451C:p.L484P                                                                                                                                                                                                                                                                                                                                                                                                         | 1.632 |          |          |                      | Fam25_f_m_aM         | 0/1;0/0;0/1         |
| chr15 | 50958794 | 50958794 | - | - | GTAA AP4E1    | exonic | frameshift insertion | AP4E1:NM_001252127:exon14:c.1626_1627insGTAA:p.D5<br>445fs*14,AP4E1:NM_007347:exon14:c.1851_1852insGTAA<br>.p.D6195fs*14                                                                                                                                                                                                                                                                                                                       | 0.577 | 0.0001   | 0.0008   | 4.89E-05             | Fam10_f_m_aM_uF      | 0/0;0/1;0/1;0/0     |
| chr15 | 52112705 | 52112705 | G | A | BCL2L10       | exonic | nonsynonymous SNV    | BCL2L10:NM_001306168:exon1:c.C22T:p.R8C,BCL2L10:NM<br>_020396:exon1:c.C22T:p.R8C                                                                                                                                                                                                                                                                                                                                                               | 1.278 |          | 0.0006   | 0.0002               | Fam27_f_m_aF_uM_uM   | 0/1;0/0;0/1;0/0;0/0 |
| chr15 | 52416277 | 52416277 | G | C | MYO5A         | exonic | nonsynonymous SNV    | MYO5A:NM_000259:exon5:c.C480G:p.I160M,MYO5A:NM_<br>001142495:exon5:c.C480G:p.I160M                                                                                                                                                                                                                                                                                                                                                             | 1.132 |          |          |                      | Fam14_f_m_aM_aM      | 0/1;0/0;0/1;0/0     |
| chr15 | 52433186 | 52433186 | C | T | MYO5A         | exonic | nonsynonymous SNV    | MYO5A:NM_000259:exon2:c.G127A:p.E43K,MYO5A:NM_0<br>01142495:exon2:c.G127A:p.E43K                                                                                                                                                                                                                                                                                                                                                               | 1.078 |          | 1.12E-05 | 2.10E-05             | Fam44_f_m_aM_uF      | 0/1;0/0;0/1;0/1     |
| chr15 | 52789080 | 52789080 | G | C | ONECUT1       | exonic | nonsynonymous SNV    | ONECUT1:NM_004498:exon1:c.C805G:p.R269G                                                                                                                                                                                                                                                                                                                                                                                                        | 1.709 | 0.0006   | 0.0009   | 0.0006               | Fam67_f_m_aM_uF      | 0/0;0/1;0/1;0/1     |

|       |          |          |   |   |         |        |                   |                                                                                                                                                                                                                                                                                                                                                                                                                                                                                                                          |       |   |          |   |          |                     |                     |                     |                     |
|-------|----------|----------|---|---|---------|--------|-------------------|--------------------------------------------------------------------------------------------------------------------------------------------------------------------------------------------------------------------------------------------------------------------------------------------------------------------------------------------------------------------------------------------------------------------------------------------------------------------------------------------------------------------------|-------|---|----------|---|----------|---------------------|---------------------|---------------------|---------------------|
| chr15 | 58014245 | 58014245 | C | T | ALDH1A2 | exonic | nonsynonymous SNV | ALDH1A2:NM_003888:exon2:c.G154A:p.G52R,ALDH1A2:NM_170696:exon2:c.G154A:p.G52R,ALDH1A2:NM_001206897:exon3:c.G91A:p.G31R                                                                                                                                                                                                                                                                                                                                                                                                   | 1.284 | . | .        | . | .        | Fam23_f_m_aM_dF_uFs | 0/1;0/0;0/1;0/0;0/0 |                     |                     |
| chr15 | 58611843 | 58611843 | C | G | ADAM10  | exonic | nonsynonymous SNV | ADAM10:NM_001320570:exon11:c.G1567C:p.D523H,ADAM10:NM_001110:exon12:c.G1660C:p.D554H                                                                                                                                                                                                                                                                                                                                                                                                                                     | 1.365 | . | .        | . | .        | Fam109_f_m_aM       | 0/1;0/0;0/1         |                     |                     |
| chr15 | 58887385 | 58887385 | C | T | SLTM    | exonic | nonsynonymous SNV | SLTM:NM_001013843:exon18:c.G2477A:p.R826Q,SLTM:NM_024755:exon18:c.G2531A:p.R844Q                                                                                                                                                                                                                                                                                                                                                                                                                                         | 1.197 | . | 0.0001   | . | 0.0002   | 9.79E-05            | Fam14_f_m_aM_aM     | 0/1;0/0;0/0;0/1     |                     |
| chr15 | 63061245 | 63061245 | T | G | TPM1    | exonic | nonsynonymous SNV | TPM1:NM_001330344:exon5:c.T503G:p.L168W,TPM1:NM_001330351:exon5:c.T503G:p.L168W,TPM1:NM_001365781:exon5:c.T503G:p.L168W,TPM1:NM_000366:exon6:c.T611G:p.L204W,TPM1:NM_001018006:exon6:c.T611G:p.L204W,TPM1:NM_001018020:exon6:c.T611G:p.L204W                                                                                                                                                                                                                                                                             | 3.119 | . | .        | . | .        | Fam10_f_m_aM_uF     | 0/0;0/1;0/1;0/0     |                     |                     |
| chr15 | 63249686 | 63249686 | C | T | RAB8B   | exonic | nonsynonymous SNV | RAB8B:NM_016530:exon3:c.C227T:p.A76V                                                                                                                                                                                                                                                                                                                                                                                                                                                                                     | 2.081 | . | .        | . | .        | 1.40E-05            | Fam85_f_m_aM_aM     | 0/0;0/0;0/1;0/0     |                     |
| chr15 | 63654211 | 63654211 | G | A | HERC1   | exonic | nonsynonymous SNV | HERC1:NM_003922:exon51:c.C10198T:p.R3400C                                                                                                                                                                                                                                                                                                                                                                                                                                                                                | 1.278 | . | 0.0001   | . | 4.50E-05 | 2.09E-05            | Fam88_f_m_aF        | 0/1;0/0;0/1         |                     |
| chr15 | 63672581 | 63672581 | T | C | HERC1   | exonic | nonsynonymous SNV | HERC1:NM_003922:exon39:c.A7960G:p.T2654A                                                                                                                                                                                                                                                                                                                                                                                                                                                                                 | 1.064 | . | .        | . | 3.43E-05 | .                   | Fam97_f_m_aM_aF     | 0/1;0/0;0/0;0/1     |                     |
| chr15 | 63680710 | 63680710 | G | C | HERC1   | exonic | nonsynonymous SNV | HERC1:NM_003922:exon35:c.C6292G:p.H2098D                                                                                                                                                                                                                                                                                                                                                                                                                                                                                 | 1.227 | . | .        | . | .        | .                   | Fam79_f_m_aM_uM     | 0/1;0/0;0/1;0/0     |                     |
| chr15 | 63758210 | 63758210 | G | A | HERC1   | exonic | nonsynonymous SNV | HERC1:NM_003922:exon4:c.C1186T:p.P396S                                                                                                                                                                                                                                                                                                                                                                                                                                                                                   | 1.732 | . | .        | . | .        | .                   | Fam35_f_m_aF_uM     | 0/1;0/0;0/1;0/0     |                     |
| chr15 | 64156789 | 64156789 | G | A | PPIB    | exonic | nonsynonymous SNV | PPIB:NM_000942:exon4:c.C464T:p.T155M                                                                                                                                                                                                                                                                                                                                                                                                                                                                                     | 1.068 | . | .        | . | 6.17E-05 | 1.40E-05            | Fam64_f_m_aM        | 0/0;0/1;0/1         |                     |
| chr15 | 64162872 | 64162872 | C | A | PPIB    | exonic | nonsynonymous SNV | PPIB:NM_000942:exon1:c.G115T:p.G39W                                                                                                                                                                                                                                                                                                                                                                                                                                                                                      | 1.131 | . | .        | . | 2.32E-05 | .                   | Fam2_f_m_aF         | 0/0;0/1;0/1         |                     |
| chr15 | 65055203 | 65055203 | C | T | RASL12  | exonic | nonsynonymous SNV | RASL12:NM_001307930:exon4:c.G440A:p.C147Y,RASL12:NM_016563:exon5:c.G497A:p.C166Y                                                                                                                                                                                                                                                                                                                                                                                                                                         | 1.078 | . | .        | . | 3.31E-05 | 2.09E-05            | Fam24_f_m_aM_aM     | 0/1;0/0;0/1;0/1     |                     |
| chr15 | 65077356 | 65077356 | G | T | KBTBD13 | exonic | nonsynonymous SNV | KBTBD13:NM_001101362:exon1:c.G541T:p.D181Y                                                                                                                                                                                                                                                                                                                                                                                                                                                                               | 1.64  | . | .        | . | 0.0001   | .                   | Fam97_f_m_aM_aF     | 0/1;0/0;0/0;0/1     |                     |
| chr15 | 65395923 | 65395923 | A | C | IGDCC4  | exonic | nonsynonymous SNV | IGDCC4:NM_020962:exon7:c.T1238G:p.M413R                                                                                                                                                                                                                                                                                                                                                                                                                                                                                  | 2.092 | . | .        | . | .        | .                   | Fam9_f_m_aM_dM_uF   | 0/0;0/1;0/1;0/1;0/0 |                     |
| chr15 | 68208360 | 68208360 | A | G | CLN6    | exonic | nonsynonymous SNV | CLN6:NM_017882:exon7:c.T716C:p.F239S                                                                                                                                                                                                                                                                                                                                                                                                                                                                                     | 1.385 | . | .        | . | .        | .                   | Fam15_f_m_aM_aM     | 0/0;0/1;0/1;0/0     |                     |
| chr15 | 68218598 | 68218598 | C | T | CLN6    | exonic | nonsynonymous SNV | CLN6:NM_017882:exon2:c.G136A:p.D46N                                                                                                                                                                                                                                                                                                                                                                                                                                                                                      | 1.009 | . | 7.35E-05 | . | 6.17E-05 | 3.49E-05            | Fam117_f_m_aM_aF    | 0/1;0/0;0/0;0/1     |                     |
| chr15 | 68710778 | 68710778 | C | T | CORO2B  | exonic | nonsynonymous SNV | CORO2B:NM_001190456:exon4:c.C365T:p.T122M,CORO2B:NM_001190457:exon4:c.C365T:p.T122M,CORO2B:NM_001324015:exon4:c.C365T:p.T122M,CORO2B:NM_006091:exon4:c.C380T:p.T127M,CORO2B:NM_001324014:exon5:c.C365T:p.T122M                                                                                                                                                                                                                                                                                                           | 1.117 | . | 7.34E-05 | . | 0.0001   | .                   | 4.19E-05            | Fam15_f_m_aM_aM     | 0/0;0/1;0/0;0/1     |
| chr15 | 72046188 | 72046188 | G | A | MYO9A   | exonic | nonsynonymous SNV | MYO9A:NM_006901:exon2:c.C376T:p.R126W                                                                                                                                                                                                                                                                                                                                                                                                                                                                                    | 1.143 | . | 0.0001   | . | 0.0003   | .                   | 0.0001              | Fam74_f_m_aM_uM     | 0/0;0/1;0/1;0/0     |
| chr15 | 73984005 | 73984005 | G | A | STOML1  | exonic | nonsynonymous SNV | STOML1:NM_001256673:exon6:c.C979T:p.R327W,STOML1:NM_001256674:exon6:c.C976T:p.R326W,STOML1:NM_001256675:exon6:c.C916T:p.R306W,STOML1:NM_001324226:exon6:c.C658T:p.R220W,STOML1:NM_001324229:exon6:c.C661T:p.R221W,STOML1:NM_001256672:exon7:c.C1126T:p.R376W,STOML1:NM_001256676:exon7:c.C865T:p.R289W,STOML1:NM_001324227:exon7:c.C868T:p.R290W,STOML1:NM_001324228:exon7:c.C868T:p.R290W,STOML1:NM_004809:exon7:c.C1129T:p.R377W,STOML1:NM_001256677:exon8:c.C1000T:p.R334W,STOML1:NM_001324230:exon8:c.C1003T:p.R335W | 1.105 | . | 0.0006   | . | 7.46E-05 | .                   | 2.79E-05            | Fam83_f_m_aF        | 0/1;0/0;0/1         |
| chr15 | 74410761 | 74410761 | G | A | SEMA7A  | exonic | nonsynonymous SNV | SEMA7A:NM_001146030:exon13:c.C1822T:p.R608C,SEMA7A:NM_001146030:exon14:c.C1369T:p.R457C,SEMA7A:NM_003612:exon14:c.C1864T:p.R622C                                                                                                                                                                                                                                                                                                                                                                                         | 1.447 | . | 0.0006   | . | 0.0004   | .                   | 0.0005              | Fam94_f_m_aM        | 0/0;0/1;0/1         |
| chr15 | 75381678 | 75381678 | C | T | SIN3A   | exonic | nonsynonymous SNV | SIN3A:NM_001145357:exon18:c.G3223A:p.V1075I,SIN3A:NM_001145358:exon18:c.G3223A:p.V1075I,SIN3A:NM_015477:exon18:c.G3223A:p.V1075I                                                                                                                                                                                                                                                                                                                                                                                         | 1     | . | .        | . | 1.12E-05 | .                   | Fam15_f_m_aM_aM     | 0/0;0/1;0/1;0/0     |                     |
| chr15 | 75639903 | 75639903 | A | C | IMP3    | exonic | nonsynonymous SNV | IMP3:NM_018285:exon1:c.T266G:p.V89G                                                                                                                                                                                                                                                                                                                                                                                                                                                                                      | 1.089 | . | .        | . | .        | .                   | Fam94_f_m_aM        | 0/0;0/1;0/1         |                     |
| chr15 | 75657046 | 75657046 | G | A | SNX33   | exonic | nonsynonymous SNV | SNX33:NM_153271:exon2:c.G1556A:p.R519H,SNX33:NM_001318146:exon3:c.G1334A:p.R445H                                                                                                                                                                                                                                                                                                                                                                                                                                         | 1.445 | . | .        | . | 3.28E-05 | .                   | Fam51_f_m_aM_uF     | 0/0;0/1;0/1;0/1     |                     |
| chr15 | 75675693 | 75675693 | G | A | CSPG4   | exonic | nonsynonymous SNV | CSPG4:NM_001897:exon10:c.C6826T:p.R2276C                                                                                                                                                                                                                                                                                                                                                                                                                                                                                 | 1.282 | . | .        | . | 0.0005   | 2.09E-05            | Fam47_f_m_aM        | 0/0;0/1;0/1         |                     |
| chr15 | 76665774 | 76665774 | T | C | SCAPER  | exonic | nonsynonymous SNV | SCAPER:NM_001145923:exon21:c.A1786G:p.K596E,SCAPER:NM_020843:exon21:c.A2524G:p.K842E,SCAPER:NM_001353009:exon22:c.A2542G:p.K848E,SCAPER:NM_001353010:exon22:c.A2122G:p.K708E,SCAPER:NM_001353011:exon22:c.A2140G:p.K714E,SCAPER:NM_001353012:exon22:c.A2122G:p.K708E                                                                                                                                                                                                                                                     | 1.177 | . | .        | . | .        | .                   | Fam56_f_m_aF_aM     | 0/0;0/1;0/0;0/1     |                     |
| chr15 | 78999766 | 78999766 | C | T | RASGRF1 | exonic | nonsynonymous SNV | RASGRF1:NM_153815:exon4:c.G419A:p.R140Q,RASGRF1:NM_001145648:exon17:c.G2723A:p.R908Q,RASGRF1:NM_02891:exon18:c.G2771A:p.R924Q                                                                                                                                                                                                                                                                                                                                                                                            | 1.104 | . | .        | . | 3.28E-05 | .                   | 6.98E-06            | Fam95_f_m_aM_aM_uF  | 0/1;0/0;0/1;0/1;0/0 |
| chr15 | 79970918 | 79970918 | T | C | BCL2A1  | exonic | nonsynonymous SNV | BCL2A1:NM_001114735:exon1:c.A202G:p.R68G,BCL2A1:NM_004049:exon1:c.A202G:p.R68G                                                                                                                                                                                                                                                                                                                                                                                                                                           | 1.344 | . | .        | . | .        | .                   | Fam48_f_m_aM_uM     | 0/0;0/1;0/1;0/1     |                     |
| chr15 | 80404543 | 80404543 | C | T | ARNT2   | exonic | nonsynonymous SNV | ARNT2:NM_014862:exon1:c.C28T:p.P10S                                                                                                                                                                                                                                                                                                                                                                                                                                                                                      | 1.63  | . | 7.93E-05 | . | 0.0004   | .                   | 8.60E-05            | Fam109_f_m_aM       | 0/0;0/1;0/1         |
| chr15 | 80925650 | 80925650 | C | T | CEMIP   | exonic | nonsynonymous SNV | CEMIP:NM_018689:exon18:c.C2315T:p.P772L,CEMIP:NM_001293298:exon19:c.C2315T:p.P772L,CEMIP:NM_001293304:exon19:c.C2315T:p.P772L                                                                                                                                                                                                                                                                                                                                                                                            | 1.148 | . | 0.0001   | . | 0.0003   | .                   | 0.0002              | Fam36_f_m_aM_uM     | 0/0;0/1;0/1;0/1     |
| chr15 | 80937826 | 80937826 | C | A | CEMIP   | exonic | nonsynonymous SNV | CEMIP:NM_018689:exon24:c.C3254A:p.P1085Q,CEMIP:NM_001293298:exon25:c.C3254A:p.P1085Q,CEMIP:NM_001293304:exon25:c.C3254A:p.P1085Q                                                                                                                                                                                                                                                                                                                                                                                         | 1.117 | . | .        | . | 1.12E-05 | .                   | Fam118_f_m_aM_aF_uM | 0/1;0/0;0/1;0/1;0/0 |                     |
| chr15 | 81003077 | 81003077 | A | C | TLNRD1  | exonic | nonsynonymous SNV | TLNRD1:NM_022566:exon1:c.A806C:p.Q269P                                                                                                                                                                                                                                                                                                                                                                                                                                                                                   | 1.062 | . | .        | . | .        | .                   | Fam56_f_m_aF_aM     | 0/1;0/0;0/0;0/1     |                     |
| chr15 | 82666816 | 82666816 | G | A | AP3B2   | exonic | nonsynonymous SNV | AP3B2:NM_001278511:exon14:c.C1687T:p.L563F,AP3B2:NM_001278512:exon15:c.C1783T:p.L595F,AP3B2:NM_004644:exon15:c.C1783T:p.L595F                                                                                                                                                                                                                                                                                                                                                                                            | 1.38  | . | 7.35E-05 | . | 5.63E-05 | .                   | 1.40E-05            | Fam16_f_m_aM_aM     | 0/0;0/1;0/1;0/0     |

|       |          |          |   |   |           |          |                     |                                                                                                                                                                                                                                                                                                                                                                                                                                                                                                                                                                                                                                                                                                                                   |       |          |          |          |                      |                     |
|-------|----------|----------|---|---|-----------|----------|---------------------|-----------------------------------------------------------------------------------------------------------------------------------------------------------------------------------------------------------------------------------------------------------------------------------------------------------------------------------------------------------------------------------------------------------------------------------------------------------------------------------------------------------------------------------------------------------------------------------------------------------------------------------------------------------------------------------------------------------------------------------|-------|----------|----------|----------|----------------------|---------------------|
| chr15 | 83572657 | 83572657 | C | T | SH3GL3    | exonic   | nonsynonymous SNV   | SH3GL3:NM_001324182:exon5:c.C424T;p.P1425,SH3GL3:NM_001324187:exon5:c.C217T;p.P735,SH3GL3:NM_003027:exon5:c.C424T;p.P1425,SH3GL3:NM_001324183:exon6:c.C448T;p.P1505,SH3GL3:NM_001324185:exon6:c.C217T;p.P735,SH3GL3:NM_001324186:exon6:c.C319T;p.P1075,SH3GL3:NM_001324184:exon7:c.C319T;p.P1075,SH3GL3:NM_001301109:exon8:c.C448T;p.P1505,SH3GL3:NM_001301108:exon6:c.T399A;p.F133L,SH3GL3:NM_001324182:exon6:c.T606A;p.F202L,SH3GL3:NM_001324187:exon6:c.T399A;p.F133L,SH3GL3:NM_003027:exon6:c.T606A;p.F202L,SH3GL3:NM_001324183:exon7:c.T630A;p.F210L,SH3GL3:NM_001324185:exon7:c.T399A;p.F133L,SH3GL3:NM_001324186:exon7:c.T501A;p.F167L,SH3GL3:NM_001324184:exon8:c.T501A;p.F167L,SH3GL3:NM_001301110:exon9:c.T630A;p.F210L | 1.271 |          |          |          | Fam78_f_m_aF_uM      | 0/1;0/0;0/1;0/0     |
| chr15 | 83576723 | 83576723 | T | A | SH3GL3    | exonic   | nonsynonymous SNV   | NTRK3:NM_001243101:exon18:c.G2312A;p.R771Q,NTRK3:NM_002530:exon19:c.G2346A;p.R779Q,NTRK3:NM_001012338:exon20:c.G2378A;p.R793Q,NTRK3:NM_001320134:exon12:c.G1489A;p.G497R,NTRK3:NM_001320135:exon12:c.G1195A;p.G399R,NTRK3:NM_001243101:exon13:c.G1465A;p.G489R,NTRK3:NM_001007156:exon14:c.G1489A;p.G497R,NTRK3:NM_001012338:exon14:c.G1489A;p.G497R,NTRK3:NM_002530:exon14:c.G1489A;p.G497R                                                                                                                                                                                                                                                                                                                                      | 1.365 |          |          |          | Fam26_f_m_aM_uM      | 0/0;0/1;0/1;0/1     |
| chr15 | 87877077 | 87877077 | C | T | NTRK3     | exonic   | nonsynonymous SNV   | NTRK3:NM_001243101:exon18:c.G2312A;p.R771Q,NTRK3:NM_002530:exon19:c.G2346A;p.R779Q,NTRK3:NM_001012338:exon20:c.G2378A;p.R793Q,NTRK3:NM_001320134:exon12:c.G1489A;p.G497R,NTRK3:NM_001320135:exon12:c.G1195A;p.G399R,NTRK3:NM_001243101:exon13:c.G1465A;p.G489R,NTRK3:NM_001007156:exon14:c.G1489A;p.G497R,NTRK3:NM_001012338:exon14:c.G1489A;p.G497R,NTRK3:NM_002530:exon14:c.G1489A;p.G497R                                                                                                                                                                                                                                                                                                                                      | 1.417 | 0.0003   | 0.0007   | 6.98E-05 | Fam116_f_m_aM_aF     | 0/1;0/0;0/1;0/0     |
| chr15 | 88032953 | 88032953 | C | T | NTRK3     | exonic   | nonsynonymous SNV   | NTRK3:NM_001243101:exon18:c.G2312A;p.R771Q,NTRK3:NM_002530:exon19:c.G2346A;p.R779Q,NTRK3:NM_001012338:exon20:c.G2378A;p.R793Q,NTRK3:NM_001320134:exon12:c.G1489A;p.G497R,NTRK3:NM_001320135:exon12:c.G1195A;p.G399R,NTRK3:NM_001243101:exon13:c.G1465A;p.G489R,NTRK3:NM_001007156:exon14:c.G1489A;p.G497R,NTRK3:NM_001012338:exon14:c.G1489A;p.G497R,NTRK3:NM_002530:exon14:c.G1489A;p.G497R                                                                                                                                                                                                                                                                                                                                      | 1.237 | 0.0003   | 0.0001   | 8.41E-05 | Fam110_f_m_aM_aM_uMs | 0/1;0/0;0/1;0/1;0/0 |
| chr15 | 89104046 | 89104046 | T | A | ABHD2     | splicing |                     | IDH2:NM_001290114:exon5:c.500delT;p.V167Afs*33,IDH2:NM_001289910:exon7:c.734delT;p.V245Afs*33,IDH2:NM_002168:exon7:c.890delT;p.V297Afs*33                                                                                                                                                                                                                                                                                                                                                                                                                                                                                                                                                                                         | 0.571 |          | 0.0006   | 2.79E-05 | Fam95_f_m_aM_aM_uF   | 0/0;0/1;0/1;0/1;0/1 |
| chr15 | 90087189 | 90087189 | A | - | IDH2      | exonic   | frameshift deletion | IDH2:NM_001290114:exon5:c.500delT;p.V167Afs*33,IDH2:NM_001289910:exon7:c.734delT;p.V245Afs*33,IDH2:NM_002168:exon7:c.890delT;p.V297Afs*33                                                                                                                                                                                                                                                                                                                                                                                                                                                                                                                                                                                         | 0.502 |          |          |          | Fam47_f_m_aM         | 0/0;0/1;0/1         |
| chr15 | 90088364 | 90088364 | C | T | IDH2      | exonic   | nonsynonymous SNV   | IDH2:NM_001290114:exon3:c.G283A;p.D95N,IDH2:NM_001289910:exon5:c.G517A;p.D173N,IDH2:NM_002168:exon5:c.G673A;p.D225N                                                                                                                                                                                                                                                                                                                                                                                                                                                                                                                                                                                                               | 1.418 | 0.0004   | 0.0004   | 0.0003   | Fam99_f_m_aM_aM      | 0/1;0/0;0/0;0/1     |
| chr15 | 90476810 | 90476810 | T | G | IQGAP1    | exonic   | nonsynonymous SNV   | IQGAP1:NM_003870:exon24:c.T2932G;p.L978V,FES:NM_001143783:exon13:c.C1687T;p.R563C,FES:NM_001143784:exon13:c.C1651T;p.R551C,FES:NM_001143785:exon13:c.C1477T;p.R493C,FES:NM_002005:exon15:c.C1861T;p.R621C                                                                                                                                                                                                                                                                                                                                                                                                                                                                                                                         | 1.786 |          |          | 6.98E-06 | Fam87_f_m_aM_uM      | 0/0;0/1;0/1;0/1     |
| chr15 | 90893134 | 90893134 | C | T | FES       | exonic   | nonsynonymous SNV   | IQGAP1:NM_003870:exon24:c.T2932G;p.L978V,FES:NM_001143783:exon13:c.C1687T;p.R563C,FES:NM_001143784:exon13:c.C1651T;p.R551C,FES:NM_001143785:exon13:c.C1477T;p.R493C,FES:NM_002005:exon15:c.C1861T;p.R621C                                                                                                                                                                                                                                                                                                                                                                                                                                                                                                                         | 1.182 |          | 3.27E-05 |          | Fam71_f_m_aF         | 0/1;0/0;0/1         |
| chr15 | 90905279 | 90905279 | T | C | MAN2A2    | exonic   | nonsynonymous SNV   | MAN2A2:NM_006122:exon3:c.T161C;p.I54T,MAN2A2:NM_001320977:exon4:c.T161C;p.I54T                                                                                                                                                                                                                                                                                                                                                                                                                                                                                                                                                                                                                                                    | 1.07  |          | 3.28E-05 | 6.98E-06 | Fam71_f_m_aF         | 0/1;0/0;0/1         |
| chr15 | 90957272 | 90957272 | C | T | RCCD1     | exonic   | nonsynonymous SNV   | RCCD1:NM_001017919:exon3:c.C326T;p.P109L,RCCD1:NM_033544:exon4:c.C326T;p.P109L                                                                                                                                                                                                                                                                                                                                                                                                                                                                                                                                                                                                                                                    | 1.925 |          |          |          | Fam17_f_m_aM_uM      | 0/0;0/1;0/1;0/1     |
| chr15 | 91916183 | 91916183 | C | G | SLCO3A1   | exonic   | nonsynonymous SNV   | SLCO3A1:NM_001145044:exon2:c.C371G;p.A124G,SLCO3A1:NM_013272:exon2:c.C371G;p.A124G                                                                                                                                                                                                                                                                                                                                                                                                                                                                                                                                                                                                                                                | 2.419 |          |          |          | Fam95_f_m_aM_aM_uF   | 0/1;0/0;0/1;0/1;0/0 |
| chr15 | 92984426 | 92984426 | G | C | CHD2      | exonic   | nonsynonymous SNV   | CHD2:NM_001271:exon25:c.G3163C;p.V1055L                                                                                                                                                                                                                                                                                                                                                                                                                                                                                                                                                                                                                                                                                           | 1.3   |          | 1.12E-05 |          | Fam65_f_m_aM_uF_dF   | 0/1;0/0;0/1;0/0;0/0 |
| chr15 | 92985627 | 92985627 | G | T | CHD2      | exonic   | nonsynonymous SNV   | CHD2:NM_001271:exon26:c.G3367T;p.V1123L                                                                                                                                                                                                                                                                                                                                                                                                                                                                                                                                                                                                                                                                                           | 1.339 |          |          | 6.98E-06 | Fam110_f_m_aM_aM_uMs | 0/0;0/1;0/1;0/1;0/0 |
| chr15 | 98916752 | 98916752 | G | A | IGF1R     | exonic   | nonsynonymous SNV   | IGF1R:NM_000875:exon10:c.G2077A;p.G693S,IGF1R:NM_001291858:exon10:c.G2077A;p.G693S                                                                                                                                                                                                                                                                                                                                                                                                                                                                                                                                                                                                                                                | 1.39  | 7.34E-05 | 0.0002   | 6.28E-05 | Fam87_f_m_aM_uM      | 0/1;0/0;0/1;0/0     |
| chr16 | 58672    | 58672    | G | A | RHBDF1    | exonic   | nonsynonymous SNV   | RHBDF1:NM_022450:exon18:c.C2236T;p.R746C                                                                                                                                                                                                                                                                                                                                                                                                                                                                                                                                                                                                                                                                                          | 1.337 |          | 0.0002   | 6.98E-06 | Fam115_f_m_aF_aM_aF  | 0/1;0/0;0/1;0/1;0/1 |
| chr16 | 426164   | 426164   | C | T | RAB11FIP3 | exonic   | nonsynonymous SNV   | RAB11FIP3:NM_001370401:exon1:c.C158T;p.P53L,RAB11FIP3:NM_014700:exon1:c.C158T;p.P53L                                                                                                                                                                                                                                                                                                                                                                                                                                                                                                                                                                                                                                              | 1.038 |          |          |          | Fam72_f_m_aF_uF      | 0/1;0/0;0/1;0/1     |
| chr16 | 676999   | 676999   | G | A | RHBDL1    | exonic   | nonsynonymous SNV   | RHBDL1:NM_001278721:exon3:c.G230A;p.R77H,RHBDL1:NM_001318733:exon3:c.G650A;p.R217H,RHBDL1:NM_001278720:exon4:c.G455A;p.R152H                                                                                                                                                                                                                                                                                                                                                                                                                                                                                                                                                                                                      | 1.42  |          | 7.91E-05 | 2.79E-05 | Fam114_f_m_aM        | 0/0;0/1;0/1         |
| chr16 | 685982   | 685982   | A | G | WDR24     | exonic   | nonsynonymous SNV   | WDR24:NM_032259:exon5:c.T1460C;p.L487P                                                                                                                                                                                                                                                                                                                                                                                                                                                                                                                                                                                                                                                                                            | 1.464 |          | 9.80E-05 | 6.98E-06 | Fam22_f_m_aF_aF_uF   | 0/1;0/0;0/1;0/1;0/1 |
| chr16 | 689238   | 689238   | C | G | WDR24     | exonic   | nonsynonymous SNV   | WDR24:NM_032259:exon1:c.G403C;p.V135L                                                                                                                                                                                                                                                                                                                                                                                                                                                                                                                                                                                                                                                                                             | 1.175 |          |          |          | Fam112_f_m_aM        | 0/1;0/0;0/1         |
| chr16 | 1413848  | 1413848  | G | C | UNKL      | exonic   | nonsynonymous SNV   | UNKL:NM_001037125:exon2:c.C285G;p.D95E,UNKL:NM_01193388:exon2:c.C285G;p.D95E                                                                                                                                                                                                                                                                                                                                                                                                                                                                                                                                                                                                                                                      | 1.262 |          |          |          | Fam51_f_m_aM_uF      | 0/0;0/1;0/1;0/1     |
| chr16 | 1669109  | 1669109  | A | G | CRAMP1    | exonic   | nonsynonymous SNV   | CRAMP1:NM_020825:exon18:c.A3443G;p.H1148R                                                                                                                                                                                                                                                                                                                                                                                                                                                                                                                                                                                                                                                                                         | 1.037 |          | 1.16E-05 |          | Fam9_f_m_aM_dM_uF    | 0/1;0/0;0/1;0/0;0/1 |
| chr16 | 1766766  | 1766766  | C | T | MAPK8IP3  | exonic   | nonsynonymous SNV   | MAPK8IP3:NM_001040439:exon23:c.C2962T;p.H988Y,MAPK8IP3:NM_001318852:exon24:c.C2983T;p.H995Y,MAPK8IP3:NM_015133:exon24:c.C2980T;p.H994Y                                                                                                                                                                                                                                                                                                                                                                                                                                                                                                                                                                                            | 1.206 | 7.35E-05 | 1.14E-05 | 6.98E-06 | Fam108_f_m_aM        | 0/1;0/0;0/1         |
| chr16 | 1767211  | 1767211  | C | T | MAPK8IP3  | exonic   | nonsynonymous SNV   | MAPK8IP3:NM_001040439:exon25:c.C3130T;p.R1044C,MAPK8IP3:NM_001318852:exon26:c.C3151T;p.R1051C,MAPK8IP3:NM_015133:exon26:c.C3148T;p.R1050C                                                                                                                                                                                                                                                                                                                                                                                                                                                                                                                                                                                         | 2.034 |          |          |          | Fam2_f_m_aF          | 0/1;0/0;0/1         |
| chr16 | 1767223  | 1767223  | G | A | MAPK8IP3  | exonic   | nonsynonymous SNV   | MAPK8IP3:NM_001040439:exon25:c.C3142A;p.V1048I,MAPK8IP3:NM_001318852:exon26:c.G3163A;p.V1055I,MAPK8IP3:NM_015133:exon26:c.G3160A;p.V1054I                                                                                                                                                                                                                                                                                                                                                                                                                                                                                                                                                                                         | 1.245 |          |          |          | Fam7_f_m_aM_aM_uM    | 0/1;0/0;0/0;0/1;0/1 |
| chr16 | 2171598  | 2171598  | G | C | TRAF7     | exonic   | nonsynonymous SNV   | TRAF7:NM_032271:exon7:c.G468C;p.L156F,MLST8:NM_001352059:exon3:c.C31T;p.P115,MLST8:NM_01352060:exon3:c.C31T;p.P115,MLST8:NM_001199173:exon4:c.C229T;p.P775,MLST8:NM_001199174:exon4:c.C229T;p.P775,MLST8:NM_001199175:exon4:c.C226T;p.P765,MLST8:NM_001352057:exon4:c.C247T;p.P835,MLST8:NM_022372:exon4:c.C229T;p.P775                                                                                                                                                                                                                                                                                                                                                                                                           | 1.243 | 0.0001   | 0.0005   | 6.28E-05 | Fam70_f_m_aM         | 0/0;0/1;0/1         |
| chr16 | 2206544  | 2206544  | C | T | MLST8     | exonic   | nonsynonymous SNV   | MLST8:NM_001352059:exon3:c.C31T;p.P115,MLST8:NM_01352060:exon3:c.C31T;p.P115,MLST8:NM_001199173:exon4:c.C229T;p.P775,MLST8:NM_001199174:exon4:c.C229T;p.P775,MLST8:NM_001199175:exon4:c.C226T;p.P765,MLST8:NM_001352057:exon4:c.C247T;p.P835,MLST8:NM_022372:exon4:c.C229T;p.P775                                                                                                                                                                                                                                                                                                                                                                                                                                                 | 1.448 |          | 1.12E-05 | 6.98E-06 | Fam48_f_m_aM_uM      | 0/1;0/0;0/1;0/1     |
| chr16 | 2233094  | 2233094  | C | G | E4F1      | exonic   | nonsynonymous SNV   | E4F1:NM_001288776:exon7:c.C967G;p.L323V,E4F1:NM_004424:exon7:c.C967G;p.L323V                                                                                                                                                                                                                                                                                                                                                                                                                                                                                                                                                                                                                                                      | 1.101 |          | 2.24E-05 | 1.40E-05 | Fam56_f_m_aF_aM      | 0/1;0/0;0/1;0/1     |
| chr16 | 2472326  | 2472326  | C | T | NTN3      | exonic   | nonsynonymous SNV   | NTN3:NM_006181:exon1:c.C625T;p.P209S                                                                                                                                                                                                                                                                                                                                                                                                                                                                                                                                                                                                                                                                                              | 1.017 |          | 1.16E-05 | 6.98E-06 | Fam91_m_aM_dM_aM_dM  | 0/1;0/1;0/1;0/0;0/1 |

|       |          |          |   |   |           |        |                   |                                                                                                                                                                                                                                                                                                        |       |          |                    |                     |                     |                 |
|-------|----------|----------|---|---|-----------|--------|-------------------|--------------------------------------------------------------------------------------------------------------------------------------------------------------------------------------------------------------------------------------------------------------------------------------------------------|-------|----------|--------------------|---------------------|---------------------|-----------------|
| chr16 | 2967053  | 2967053  | C | T | KREMEN2   | exonic | nonsynonymous SNV | KREMEN2:NM_001253725:exon6:c.C667T;p.L223F,KREMEN2:NM_001253726:exon6:c.C667T;p.L223F,KREMEN2:NM_024507:exon6:c.C784T;p.L262F,KREMEN2:NM_172229:exon6:c.C784T;p.L262F                                                                                                                                  | 1.431 | 7.21E-05 | Fam86_f_m_aF       | 0/1;0/0;0/1         |                     |                 |
| chr16 | 2967059  | 2967059  | G | C | KREMEN2   | exonic | nonsynonymous SNV | KREMEN2:NM_001253725:exon6:c.G673C;p.E225Q,KREMEN2:NM_001253726:exon6:c.G673C;p.E225Q,KREMEN2:NM_024507:exon6:c.G790C;p.E264Q,KREMEN2:NM_172229:exon6:c.G790C;p.E264Q                                                                                                                                  | 1.532 |          | Fam60_f_m_aF       | 0/1;0/0;0/1         |                     |                 |
| chr16 | 3021791  | 3021791  | G | A | TNFRSF12A | exonic | nonsynonymous SNV | TNFRSF12A:NM_016639:exon4:c.G355A;p.G119R                                                                                                                                                                                                                                                              | 1.365 | 0.0003   | 2.79E-05           | Fam28_f_m_aF_uF     | 0/1;0/0;0/1;0/0     |                 |
| chr16 | 3140979  | 3140979  | A | G | ZNF213    | exonic | nonsynonymous SNV | ZNF213:NM_001134655:exon6:c.A1012G;p.T338A,ZNF213:NM_004220:exon6:c.A1012G;p.T338A,NUDT16L1:NM_001193452:exon2:c.C271G;p.L91V,NUDT16L1:NM_001370585:exon2:c.C265G;p.L89V,NUDT16L1:NM_001370586:exon2:c.C265G;p.L89V,NUDT16L1:NM_001370587:exon2:c.C271G;p.L91V,NUDT16L1:NM_032349:exon2:c.C271G;p.L91V | 1.007 |          | 6.98E-06           | Fam51_f_m_aM_uF     | 0/1;0/0;0/1;0/0     |                 |
| chr16 | 4694095  | 4694095  | C | G | NUDT16L1  | exonic | nonsynonymous SNV | NUDT16L1:NM_001370588:exon2:c.G300C;p.K100N,NUDT16L1:NM_001370585:exon3:c.G555C;p.K185N,NUDT16L1:NM_001370587:exon3:c.G441C;p.K147N,NUDT16L1:NM_032349:exon3:c.G561C;p.K187N                                                                                                                           | 1.529 |          | Fam82_f_m_aM_uF    | 0/1;0/0;0/1;0/0     |                     |                 |
| chr16 | 4695104  | 4695104  | G | C | NUDT16L1  | exonic | nonsynonymous SNV | NUDT16L1:NM_001370585:exon3:c.G555C;p.K185N,NUDT16L1:NM_001370587:exon3:c.G441C;p.K147N,NUDT16L1:NM_032349:exon3:c.G561C;p.K187N                                                                                                                                                                       | 1.31  | 0.0001   | 4.19E-05           | Fam91_m_aM_dM_aM_dM | 0/1;0/1;0/1;0/0;0/1 |                 |
| chr16 | 10941798 | 10941798 | G | T | DEXI      | exonic | nonsynonymous SNV | DEXI:NM_014015:exon1:c.C208A;p.L70I                                                                                                                                                                                                                                                                    | 1.824 | 7.35E-05 | 1.40E-05           | Fam86_f_m_aF        | 0/1;0/0;0/1         |                 |
| chr16 | 11886558 | 11886558 | T | C | GSPT1     | exonic | nonsynonymous SNV | GSPT1:NM_001130006:exon9:c.A1163G;p.N388S,GSPT1:NM_001130007:exon9:c.A752G;p.N2515,GSPT1:NM_002094:exon9:c.A1166G;p.N389S                                                                                                                                                                              | 1.087 | 0.0002   | 3.49E-05           | Fam84_f_m_aF        | 0/1;0/0;0/1         |                 |
| chr16 | 15612561 | 15612561 | A | G | MARF1     | exonic | nonsynonymous SNV | MARF1:NM_001184998:exon17:c.T3470C;p.L1157S,MARF1:NM_001184999:exon17:c.T3461C;p.L1154S,MARF1:NM_014647:exon17:c.T3470C;p.L1157S                                                                                                                                                                       | 1.682 |          | 3.28E-05           | Fam35_f_m_aF_uM     | 0/0;0/1;0/1;0/0     |                 |
| chr16 | 15741818 | 15741818 | T | A | MYH11     | exonic | nonsynonymous SNV | MYH11:NM_002474:exon21:c.A2594T;p.K865M,MYH11:NM_022844:exon21:c.A2594T;p.K865M,MYH11:NM_001040113:exon22:c.A2615T;p.K872M,MYH11:NM_001040114:exon22:c.A2615T;p.K872M                                                                                                                                  | 1.81  |          | Fam5_f_m_aM        | 0/0;0/1;0/1         |                     |                 |
| chr16 | 16114878 | 16114878 | T | G | ABCC1     | exonic | nonsynonymous SNV | ABCC1:NM_004996:exon23:c.T3192G;p.F1064L                                                                                                                                                                                                                                                               | 1.188 |          | 6.98E-06           | Fam46_f_m_aM_uM     | 0/0;0/1;0/1;0/1     |                 |
| chr16 | 16136619 | 16136619 | T | A | ABCC1     | exonic | nonsynonymous SNV | ABCC1:NM_004996:exon29:c.T4267A;p.C1423S                                                                                                                                                                                                                                                               | 1.22  | 0.0009   | 0.0005             | 0.0003              | Fam114_f_m_aM       | 0/1;0/0;0/1     |
| chr16 | 18795529 | 18795529 | T | G | ARL6IP1   | exonic | nonsynonymous SNV | ARL6IP1:NM_001313858:exon4:c.A256C;p.T86P,ARL6IP1:NM_015161:exon4:c.A343C;p.T115P                                                                                                                                                                                                                      | 1.554 |          | Fam17_f_m_aM_uM    | 0/1;0/0;0/1;0/1     |                     |                 |
| chr16 | 19627783 | 19627783 | G | A | VPS35L    | exonic | nonsynonymous SNV | VPS35L:NM_001300743:exon14:c.G1160A;p.C387Y,VPS35L:NM_001365294:exon14:c.G1160A;p.C387Y,VPS35L:NM_01365293:exon16:c.G1361A;p.C454Y,VPS35L:NM_020314:exon16:c.G1361A;p.C454Y,VPS35L:NM_001365295:exon17:c.G473A;p.C158Y                                                                                 | 1.012 | 1.12E-05 | 1.40E-05           | Fam40_f_m_aM_aM     | 0/0;0/1;0/0;0/1     |                 |
| chr16 | 19872287 | 19872287 | G | A | GPRC5B    | exonic | nonsynonymous SNV | GPRC5B:NM_001304771:exon2:c.C952T;p.R318C,GPRC5B:NM_016235:exon2:c.C597T;p.R187C                                                                                                                                                                                                                       | 1.465 |          | Fam68_f_m_aF_uF_uM | 0/0;0/1;0/1;0/0;0/1 |                     |                 |
| chr16 | 22313637 | 22313637 | C | T | POLR3E    | exonic | nonsynonymous SNV | POLR3E:NM_001258034:exon6:c.C274T;p.P92S,POLR3E:NM_001258035:exon6:c.C274T;p.P92S,POLR3E:NM_001258036:exon7:c.C382T;p.P128S,POLR3E:NM_001258036:exon7:c.C382T;p.P128S,POLR3E:NM_018119:exon7:c.C382T;p.P128S                                                                                           | 1.209 | 3.28E-05 | 6.98E-06           | Fam36_f_m_aM_uM     | 0/0;0/1;0/1;0/0     |                 |
| chr16 | 22915429 | 22915429 | G | A | HS3ST2    | exonic | nonsynonymous SNV | HS3ST2:NM_006043:exon2:c.G971A;p.R324Q                                                                                                                                                                                                                                                                 | 2.192 |          | 7.00E-06           | Fam1_f_m_aM         | 0/0;0/1;0/1         |                 |
| chr16 | 23406239 | 23406239 | T | C | COG7      | exonic | nonsynonymous SNV | COG7:NM_153603:exon12:c.A1499G;p.Y500C                                                                                                                                                                                                                                                                 | 1.052 | 7.34E-05 | 0.0007             | 0.0002              | Fam56_f_m_aF_aM     | 0/0;0/1;0/0;0/1 |
| chr16 | 23410314 | 23410314 | C | T | COG7      | exonic | nonsynonymous SNV | COG7:NM_153603:exon11:c.G1456A;p.E486K                                                                                                                                                                                                                                                                 | 1     | 0.0006   | 2.09E-05           | Fam9_f_m_aM_dM_uF   | 0/0;0/1;0/1;0/1;0/0 |                 |
| chr16 | 24092883 | 24092883 | A | G | PRKCB     | exonic | nonsynonymous SNV | PRKCB:NM_002738:exon6:c.A622G;p.S208G,PRKCB:NM_12535:exon6:c.A622G;p.S208G                                                                                                                                                                                                                             | 1.01  |          | Fam13_f_m_aM       | 0/1;0/0;0/1         |                     |                 |
| chr16 | 24113032 | 24113032 | G | A | PRKCB     | exonic | nonsynonymous SNV | PRKCB:NM_002738:exon8:c.G881A;p.G294E                                                                                                                                                                                                                                                                  | 1.365 | 0.0003   | 0.0006             | 0.0003              | Fam71_f_m_aF        | 0/0;0/1;0/1     |
| chr16 | 24113068 | 24113068 | A | C | PRKCB     | exonic | nonsynonymous SNV | PRKCB:NM_002738:exon8:c.A917C;p.E306A,PRKCB:NM_212535:exon8:c.A917C;p.E306A                                                                                                                                                                                                                            | 1.325 |          | Fam95_f_m_aM_aM_uF | 0/1;0/0;0/1;0/1;0/0 |                     |                 |
| chr16 | 24816854 | 24816854 | A | G | TNRC6A    | exonic | nonsynonymous SNV | TNRC6A:NM_001330520:exon19:c.A4723G;p.I1575V,TNRC6A:NM_001331850:exon19:c.A4750G;p.I1584V,TNRC6A:NM_014494:exon20:c.A4870G;p.I1624V                                                                                                                                                                    | 1.322 | 3.29E-05 | 6.98E-06           | Fam117_f_m_aM_aF    | 0/1;0/0;0/1;0/1     |                 |
| chr16 | 24820246 | 24820246 | C | G | TNRC6A    | exonic | nonsynonymous SNV | TNRC6A:NM_001330520:exon21:c.C5041G;p.P1681A,TNRC6A:NM_001331850:exon21:c.C5068G;p.P1690A,TNRC6A:NM_014494:exon22:c.C5188G;p.P1730A                                                                                                                                                                    | 1.462 | 5.58E-05 | 2.10E-05           | Fam107_f_m_aM       | 0/1;0/0;0/1         |                 |
| chr16 | 27493242 | 27493242 | G | A | GTF3C1    | exonic | nonsynonymous SNV | GTF3C1:NM_001286242:exon17:c.C2833T;p.R945C,GTF3C1:NM_001520:exon17:c.C2833T;p.R945C                                                                                                                                                                                                                   | 1.267 | 9.83E-05 | 1.40E-05           | Fam119_f_m_aM_aM    | 0/0;0/1;0/1;0/0     |                 |
| chr16 | 28956306 | 28956306 | G | A | NFATC2IP  | exonic | nonsynonymous SNV | NFATC2IP:NM_032815:exon5:c.G815A;p.R272Q                                                                                                                                                                                                                                                               | 1.001 |          | Fam36_f_m_aM_uM    | 0/0;0/1;0/1;0/1     |                     |                 |
| chr16 | 28983930 | 28983930 | C | T | SPNS1     | exonic | nonsynonymous SNV | SPNS1:NM_001142449:exon9:c.C1243T;p.R415C,SPNS1:NM_001142451:exon10:c.C1309T;p.R437C,SPNS1:NM_032038:exon11:c.C1465T;p.R489C,SPNS1:NM_001142448:exon12:c.C1465T;p.R489C,SPNS1:NM_001142450:exon12:c.C146T;p.R416C                                                                                      | 1.556 | 7.60E-05 | Fam53_f_m_aM       | 0/1;0/0;0/1         |                     |                 |
| chr16 | 29695171 | 29695171 | A | T | QPRT      | exonic | nonsynonymous SNV | QPRT:NM_014298:exon2:c.A521T;p.H174L                                                                                                                                                                                                                                                                   | 1.588 | 0.0003   | 5.58E-05           | Fam97_f_m_aM_aF     | 0/1;0/0;0/0;0/1     |                 |
| chr16 | 29695171 | 29695171 | A | T | QPRT      | exonic | nonsynonymous SNV | QPRT:NM_014298:exon2:c.A521T;p.H174L                                                                                                                                                                                                                                                                   | 1.588 | 0.0003   | 5.58E-05           | Fam25_f_m_aM        | 0/1;0/0;0/1         |                 |
| chr16 | 29840203 | 29840203 | C | T | MVP       | exonic | nonsynonymous SNV | MVP:NM_001293204:exon7:c.C935T;p.P312L,MVP:NM_001293205:exon7:c.C935T;p.P312L,MVP:NM_005115:exon8:c.C935T;p.P312L,MVP:NM_017458:exon8:c.C935T;p.P312L                                                                                                                                                  | 1.131 | 1.12E-05 | Fam89_f_m_aM       | 0/1;0/0;0/1         |                     |                 |

|       |          |          |      |   |          |        |                     |                                                                                                                                                                                                                                        |       |          |          |          |                        |                         |                 |
|-------|----------|----------|------|---|----------|--------|---------------------|----------------------------------------------------------------------------------------------------------------------------------------------------------------------------------------------------------------------------------------|-------|----------|----------|----------|------------------------|-------------------------|-----------------|
| chr16 | 29840254 | 29840254 | A    | C | MVP      | exonic | nonsynonymous SNV   | MVP:NM_001293204:exon7:c.A986C:p.Q329P,MVP:NM_01293205:exon7:c.A986C:p.Q329P,MVP:NM_005115:exon8:c.A986C:p.Q329P,MVP:NM_017458:exon8:c.A986C:p.Q329P                                                                                   | 1.226 |          |          |          | Fam79_f_m_aM_uM        | 0/0;0/1;0/1;0/1         |                 |
| chr16 | 29841656 | 29841656 | G    | A | MVP      | exonic | nonsynonymous SNV   | MVP:NM_001293204:exon8:c.G1252A:p.E418K,MVP:NM_001293205:exon8:c.G1252A:p.E418K,MVP:NM_005115:exon9:c.G1252A:p.E418K,MVP:NM_017458:exon9:c.G1252A:p.E418K                                                                              | 1.176 | 0.0002   | 0.0003   | 6.98E-05 | Fam110_f_m_aM_aM_uMs   | 0/0;0/1;0/1;0/0;0/0     |                 |
| chr16 | 30009243 | 30009243 | C    | T | DOC2A    | exonic | nonsynonymous SNV   | DOC2A:NM_001282068:exon4:c.G376A:p.D126N,DOC2A:NM_003586:exon4:c.G376A:p.D126N,DOC2A:NM_001282062:exon5:c.G376A:p.D126N,DOC2A:NM_001282063:exon5:c.G376A:p.D126N                                                                       | 1.117 |          | 9.33E-05 |          | Fam26_f_m_aM_uM        | 0/1;0/0;0/1;0/0         |                 |
| chr16 | 30370015 | 30370015 | C    | G | TBC1D10B | exonic | nonsynonymous SNV   | TBC1D10B:NM_015527:exon1:c.G169C:p.E57Q                                                                                                                                                                                                | 1.533 | 7.41E-05 |          | 3.49E-05 | Fam110_f_m_aM_aM_uMs   | 0/0;0/1;0/0;0/1;0/0     |                 |
| chr16 | 30418102 | 30418102 | C    | T | ZNF771   | exonic | nonsynonymous SNV   | ZNF771:NM_001142305:exon3:c.C689T:p.P230L,ZNF771:NM_016643:exon3:c.C689T:p.P230L                                                                                                                                                       | 3.171 |          |          |          | Fam112_f_m_aM          | 0/1;0/0;0/1             |                 |
| chr16 | 30496190 | 30496190 | G    | A | ITGAL    | exonic | nonsynonymous SNV   | ITGAL:NM_001114380:exon12:c.G1348A:p.G450S,ITGAL:NM_002209:exon14:c.G1597A:p.G533S                                                                                                                                                     | 1.014 |          | 0.0007   | 4.19E-05 | Fam22_f_m_aF_aF_uF     | 0/0;0/1;0/1;0/1;0/1     |                 |
| chr16 | 30525322 | 30525322 | C    | A | ZNF768   | exonic | nonsynonymous SNV   | ZNF768:NM_024671:exon2:c.G818T:p.G273V                                                                                                                                                                                                 | 1.876 |          |          | 6.98E-06 | Fam107_f_m_aM          | 0/0;0/1;0/1             |                 |
| chr16 | 30662847 | 30662847 | T    | A | FBRS     | exonic | nonsynonymous SNV   | FBRS:NM_001105079:exon6:c.T1043A:p.L348H                                                                                                                                                                                               | 2.271 |          | 0.0001   | 6.28E-05 | Fam91_m_aM_dM_aM_dM    | 0/0;0/1;0/0;0/0;0/1     |                 |
| chr16 | 30766503 | 30766503 | G    | A | RNF40    | exonic | nonsynonymous SNV   | RNF40:NM_001207033:exon10:c.G1238A:p.R413Q,RNF40:NM_001286572:exon10:c.G1238A:p.R413Q,RNF40:NM_014771:exon10:c.G1238A:p.R413Q                                                                                                          | 1.565 | 7.35E-05 | 7.51E-05 | 2.09E-05 | Fam13_f_m_aM           | 0/0;0/1;0/1             |                 |
| chr16 | 31001112 | 31001112 | C    | A | STX1B    | exonic | nonsynonymous SNV   | STX1B:NM_052874:exon3:c.G187T:p.A63S                                                                                                                                                                                                   | 1.094 |          | 1.12E-05 | 6.98E-06 | Fam29_f_m_aF_uM        | 0/1;0/0;0/1;0/0         |                 |
| chr16 | 31001159 | 31001159 | G    | A | STX1B    | exonic | nonsynonymous SNV   | STX1B:NM_052874:exon3:c.C140T:p.S47L                                                                                                                                                                                                   | 1.326 |          | 3.35E-05 | 6.98E-06 | Fam108_f_m_aM          | 0/0;0/1;0/1             |                 |
| chr16 | 31061150 | 31061150 | G    | A | ZNF668   | exonic | nonsynonymous SNV   | ZNF668:NM_001172668:exon3:c.C1778T:p.T593I,ZNF668:NM_001172670:exon3:c.C1778T:p.T593I,ZNF668:NM_024706:exon3:c.C1778T:p.T593I,ZNF668:NM_001172669:exon4:c.C1847T:p.T616I                                                               | 2.032 |          | 0.0003   | 3.49E-05 | Fam23_f_m_aM_dF_uFs    | 0/1;0/0;0/1;0/0;0/0     |                 |
| chr16 | 31321615 | 31321615 | C    | T | ITGAM    | exonic | nonsynonymous SNV   | ITGAM:NM_000632:exon16:c.C1990T:p.R664W,ITGAM:NM_001145808:exon16:c.C1993T:p.R665W                                                                                                                                                     | 1.009 |          | 0.0001   | 4.19E-05 | Fam40_f_m_aM_aM        | 0/1;0/0;0/1;0/0         |                 |
| chr16 | 31466484 | 31466484 | G    | T | ARMC5    | exonic | nonsynonymous SNV   | ARMC5:NM_001105247:exon6:c.G2403T:p.W801C,ARMC5:NM_001301820:exon7:c.G2499T:p.W833C,ARMC5:NM_01288767:exon8:c.G2688T:p.W896C                                                                                                           | 1.79  | 0.0001   | 5.67E-05 | 3.49E-05 | Fam39_f_m_aM           | 0/1;0/0;0/1             |                 |
| chr16 | 46909852 | 46909852 | C    | T | GPT2     | exonic | nonsynonymous SNV   | GPT2:NM_001142466:exon6:c.C445T:p.R149W,GPT2:NM_133443:exon6:c.C745T:p.R249W                                                                                                                                                           | 1.266 | 0.0006   | 0.0003   | 0.0002   | Fam75_f_m_aM           | 0/0;0/1;0/1             |                 |
| chr16 | 46918675 | 46918675 | G    | A | GPT2     | exonic | nonsynonymous SNV   | GPT2:NM_001142466:exon8:c.G655A:p.V219M,GPT2:NM_133443:exon8:c.G955A:p.V319M                                                                                                                                                           | 1.281 | 0.0001   | 0.0002   | 0.0002   | Fam113_f_m_aF_raM_uF   | 0/0;0/0;0/0;0/1;0/0     |                 |
| chr16 | 47161796 | 47161796 | T    | G | ITFG1    | exonic | nonsynonymous SNV   | ITFG1:NM_001305002:exon16:c.A1276C:p.N426H,ITFG1:NM_030790:exon16:c.A1615C:p.N539H                                                                                                                                                     | 1.249 |          |          | 1.40E-05 | Fam2_f_m_aF            | 0/1;0/0;0/1             |                 |
| chr16 | 47454023 | 47454023 | A    | C | ITFG1    | exonic | nonsynonymous SNV   | ITFG1:NM_001305002:exon3:c.T78G:p.N26K,ITFG1:NM_030790:exon3:c.T417G:p.N139K                                                                                                                                                           | 1.296 |          | 0.0006   | 4.19E-05 | Fam116_f_m_aM_aF       | 0/0;0/1;0/0;0/1         |                 |
| chr16 | 50304495 | 50304495 | C    | T | ADCY7    | exonic | nonsynonymous SNV   | ADCY7:NM_001114:exon11:c.C1504T:p.H502Y,ADCY7:NM_001286057:exon11:c.C1504T:p.H502Y                                                                                                                                                     | 1.331 |          |          | 3.49E-05 | Fam55_f_m_aM_aM_dM     | 0/0;0/1;0/0;0/1;0/0     |                 |
| chr16 | 50308352 | 50308352 | G    | A | ADCY7    | exonic | nonsynonymous SNV   | ADCY7:NM_001114:exon16:c.G1876A:p.G626R,ADCY7:NM_001286057:exon16:c.G1876A:p.G626R                                                                                                                                                     | 1.468 | 0.0001   | 0.0001   | 2.79E-05 | Fam46_f_m_aM_uM        | 0/0;0/1;0/1;0/1         |                 |
| chr16 | 54931226 | 54931226 | C    | T | IRX5     | exonic | stopgain            | IRX5:NM_001252197:exon1:c.C28T:p.Q10X,IRX5:NM_005853:exon1:c.C28T:p.Q10X                                                                                                                                                               | 0.417 |          |          |          | Fam102_f_m_aM          | 0/0;0/0;0/1             |                 |
| chr16 | 55485759 | 55485759 | G    | A | MMP2     | exonic | nonsynonymous SNV   | MMP2:NM_001127891:exon5:c.G664A:p.G222S,MMP2:NM_001302508:exon5:c.G586A:p.G196S,MMP2:NM_001302509:exon5:c.G586A:p.G196S,MMP2:NM_001302510:exon5:c.G586A:p.G196S,MMP2:NM_004530:exon5:c.G814A:p.G272S                                   | 1.014 |          |          |          | Fam64_f_m_aM           | 0/0;0/1;0/1             |                 |
| chr16 | 55498306 | 55498306 | T    | C | MMP2     | exonic | nonsynonymous SNV   | MMP2:NM_001127891:exon11:c.T1477C:p.Y493H,MMP2:NM_001302508:exon11:c.T1399C:p.Y467H,MMP2:NM_001302510:exon11:c.T1399C:p.Y467H,MMP2:NM_004530:exon11:c.T1627C:p.Y543H                                                                   | 1.184 | 0.0002   | 0.0002   | 9.77E-05 | Fam74_f_m_aM_uM        | 0/0;0/1;0/1;0/0         |                 |
| chr16 | 56834232 | 56834232 | C    | T | NUP93    | exonic | nonsynonymous SNV   | NUP93:NM_001242795:exon12:c.C1273T:p.L425F,NUP93:NM_001242796:exon12:c.C1273T:p.L425F,NUP93:NM_014669:exon14:c.C1642T:p.L548F                                                                                                          | 1.124 |          | 0.0001   | 5.58E-05 | Fam66_f_m_aM           | 0/1;0/0;0/1             |                 |
| chr16 | 57216984 | 57216984 | T    | G | RSPRY1   | exonic | nonsynonymous SNV   | RSPRY1:NM_001305163:exon8:c.T850G:p.Y284D,RSPRY1:NM_001305164:exon8:c.T850G:p.Y284D,RSPRY1:NM_133368:exon8:c.T850G:p.Y284D                                                                                                             | 2.213 |          |          |          | Fam65_f_m_aM_uF_dF     | 0/0;0/1;0/1;0/0;0/1     |                 |
| chr16 | 57470012 | 57470012 | A    | G | POLR2C   | exonic | nonsynonymous SNV   | POLR2C:NM_032940:exon7:c.A491G:p.Y164C                                                                                                                                                                                                 | 1.842 | 7.35E-05 | 0.0004   | 2.79E-05 | Fam57_f_m_aM_uF        | 0/0;0/1;0/1;0/0         |                 |
| chr16 | 57470122 | 57470122 | G    | A | POLR2C   | exonic | nonsynonymous SNV   | POLR2C:NM_032940:exon7:c.G601A:p.E201K                                                                                                                                                                                                 | 1.331 |          | 1.12E-05 | 6.98E-06 | Fam118_f_m_aM_aF_uM    | 0/0;0/0;0/1;0/1;0/0     |                 |
| chr16 | 58543534 | 58543537 | AGAC | - | CNOT1    | exonic | frameshift deletion | CNOT1:NM_206999:exon31:c.4504_4507del:p.V1502ifs*18                                                                                                                                                                                    | 0.064 |          | 0.0003   | 0.0001   | 6.99E-05               | Fam21_f_m_aM_uM         | 0/1;0/0;0/1;0/0 |
| chr16 | 58546700 | 58546700 | G    | C | CNOT1    | exonic | nonsynonymous SNV   | CNOT1:NM_001265612:exon28:c.C3785G:p.A1262G,CNOT1:NM_016284:exon28:c.C3800G:p.A1267G,CNOT1:NM_206999:exon28:c.C3800G:p.A1267G                                                                                                          | 1.257 |          | 3.28E-05 | 6.98E-06 | Fam34_f_m_aM_uF        | 0/1;0/0;0/1;0/1         |                 |
| chr16 | 61653663 | 61653663 | C    | T | CDH8     | exonic | nonsynonymous SNV   | CDH8:NM_001796:exon12:c.G2345A:p.R782H                                                                                                                                                                                                 | 1.422 |          | 6.19E-05 | 2.79E-05 | Fam40_f_m_aM_aM        | 0/0;0/1;0/1;0/1         |                 |
| chr16 | 66517140 | 66517140 | G    | A | TK2      | exonic | nonsynonymous SNV   | TK2:NM_001172644:exon7:c.C539T:p.P180L,TK2:NM_001172645:exon7:c.C560T:p.P187L,TK2:NM_001172643:exon8:c.C521T:p.P174L,TK2:NM_001272050:exon8:c.C323T:p.P108L,TK2:NM_004614:exon8:c.C614T:p.P205L,TK2:NM_001271934:exon9:c.C467T:p.P156L | 1.118 |          | 6.17E-05 | 5.58E-05 | Fam35_f_m_aF_uM        | 0/1;0/0;0/1;0/1         |                 |
| chr16 | 66922156 | 66922156 | C    | G | RRAD     | exonic | nonsynonymous SNV   | RRAD:NM_001128850:exon5:c.G847C:p.G283R,RRAD:NM_004165:exon5:c.G847C:p.G283R                                                                                                                                                           | 1.799 |          | 0.0001   | 5.58E-05 | Fam77_f_m_aM_aF_uM_uFs | 0/0;0/1;0/0;0/1;0/1;0/0 |                 |
| chr16 | 66923600 | 66923600 | G    | A | RRAD     | exonic | nonsynonymous SNV   | RRAD:NM_001128850:exon4:c.C565T:p.R189C,RRAD:NM_004165:exon4:c.C565T:p.R189C                                                                                                                                                           | 1.925 | 7.37E-05 | 3.27E-05 | 1.40E-05 | Fam10_f_m_aM_uF        | 0/0;0/1;0/1;0/1         |                 |

|       |          |          |   |   |          |        |                   |                                                                                                                                                                                                                                                                                                                                                                                                                                                                 |       |          |          |          |                        |                         |                     |
|-------|----------|----------|---|---|----------|--------|-------------------|-----------------------------------------------------------------------------------------------------------------------------------------------------------------------------------------------------------------------------------------------------------------------------------------------------------------------------------------------------------------------------------------------------------------------------------------------------------------|-------|----------|----------|----------|------------------------|-------------------------|---------------------|
| chr16 | 67149444 | 67149444 | G | A | B3GNT9   | exonic | nonsynonymous SNV | B3GNT9:NM_033309:exon2:c.C1042T;p.P348S                                                                                                                                                                                                                                                                                                                                                                                                                         | 1.818 | .        | .        | .        | Fam35_f_m_aF_uM        | 0/0;0/1;0/1;0/0         |                     |
| chr16 | 67150026 | 67150026 | A | C | B3GNT9   | exonic | nonsynonymous SNV | B3GNT9:NM_033309:exon2:c.T460G;p.F154V                                                                                                                                                                                                                                                                                                                                                                                                                          | 2.078 | .        | .        | .        | Fam118_f_m_aM_aF_uM    | 0/1;0/0;0/1;0/0;0/0     |                     |
| chr16 | 67163215 | 67163215 | C | G | FBXL8    | exonic | nonsynonymous SNV | FBXL8:NM_018378:exon3:c.C520G;p.L174V                                                                                                                                                                                                                                                                                                                                                                                                                           | 1.279 | .        | .        | .        | Fam84_f_m_aF           | 0/1;0/0;0/1             |                     |
| chr16 | 67238250 | 67238250 | G | A | FHOD1    | exonic | nonsynonymous SNV | FHOD1:NM_001318202:exon5:c.C499T;p.R167C;FHOD1:NM_013241:exon5:c.C499T;p.R167C;SLC9A5:NM_001323971:exon1:c.C71T;p.P24L;SLC9A5:NM_001323972:exon1:c.C71T;p.P24L;SLC9A5:NM_001323973:exon1:c.C71T;p.P24L;SLC9A5:NM_004594:exon1:c.C71T;p.P24L                                                                                                                                                                                                                     | 1.665 | 7.35E-05 | 6.53E-05 | 2.79E-05 | Fam71_f_m_aF           | 0/1;0/0;0/1             |                     |
| chr16 | 67249085 | 67249085 | C | T | SLC9A5   | exonic | nonsynonymous SNV | SLC9A5:NM_001323972:exon1:c.C71T;p.P24L;SLC9A5:NM_001323973:exon1:c.C71T;p.P24L;SLC9A5:NM_004594:exon1:c.C71T;p.P24L                                                                                                                                                                                                                                                                                                                                            | 1.491 | .        | .        | .        | Fam35_f_m_aF_uM        | 0/0;0/1;0/1;0/0         |                     |
| chr16 | 67438551 | 67438551 | C | T | ATP6V0D1 | exonic | nonsynonymous SNV | ATP6V0D1:NM_004691:exon8:c.G1033A;p.D345N                                                                                                                                                                                                                                                                                                                                                                                                                       | 1.044 | .        | .        | .        | Fam118_f_m_aM_aF_uM    | 0/0;0/1;0/0;0/1;0/1     |                     |
| chr16 | 67540119 | 67540119 | C | T | RIPOR1   | exonic | nonsynonymous SNV | RIPOR1:NM_001193522:exon7:c.C493T;p.R165C;RIPOR1:NM_001193523:exon7:c.C541T;p.R181C;RIPOR1:NM_001193524:exon7:c.C523T;p.R175C;RIPOR1:NM_024519:exon7:c.C481T;p.R161C;RIPOR1:NM_001193522:exon7:c.G566A;p.R189H;RIPOR1:NM_001193523:exon7:c.G614A;p.R205H;RIPOR1:NM_001193524:exon7:c.G596A;p.R199H;RIPOR1:NM_024519:exon7:c.G554A;p.R185H;CTCF:NM_001191022:exon7:c.C569G;p.T190S;CTCF:NM_01363916:exon9:c.C1553G;p.T518S;CTCF:NM_006565:exon9:c.C1553G;p.T518S | 1.767 | 7.35E-05 | 6.70E-05 | 0.0002   | Fam82_f_m_aM_uF        | 0/0;0/1;0/1;0/1         |                     |
| chr16 | 67540192 | 67540192 | G | A | RIPOR1   | exonic | nonsynonymous SNV | RIPOR1:NM_001193523:exon7:c.G614A;p.R205H;RIPOR1:NM_001193524:exon7:c.G596A;p.R199H;RIPOR1:NM_024519:exon7:c.G554A;p.R185H;CTCF:NM_001191022:exon7:c.C569G;p.T190S;CTCF:NM_01363916:exon9:c.C1553G;p.T518S;CTCF:NM_006565:exon9:c.C1553G;p.T518S                                                                                                                                                                                                                | 1.664 | 7.35E-05 | 0.0002   | 0.0002   | Fam99_f_m_aM_aM        | 0/0;0/1;0/1;0/1         |                     |
| chr16 | 67628404 | 67628404 | C | G | CTCF     | exonic | nonsynonymous SNV | CTCF:NM_001191022:exon7:c.C569G;p.T190S;CTCF:NM_01363916:exon9:c.C1553G;p.T518S;CTCF:NM_006565:exon9:c.C1553G;p.T518S                                                                                                                                                                                                                                                                                                                                           | 1.903 | .        | .        | .        | Fam33_f_m_aM_uM        | 0/0;0/1;0/1;0/1         |                     |
| chr16 | 67629412 | 67629412 | A | T | CTCF     | exonic | nonsynonymous SNV | CTCF:NM_001191022:exon8:c.A732T;p.R244S;CTCF:NM_01363916:exon10:c.A1716T;p.R572S;CTCF:NM_006565:exon10:c.A1716T;p.R572S                                                                                                                                                                                                                                                                                                                                         | 3.211 | .        | .        | .        | Fam45_f_m_aM_uF        | 0/1;0/0;0/1;0/1         |                     |
| chr16 | 67649936 | 67649936 | C | T | CARMIL2  | exonic | nonsynonymous SNV | CARMIL2:NM_001013838:exon21:c.C2050T;p.R684C;CARMIL2:NM_001317026:exon22:c.C1942T;p.R648C                                                                                                                                                                                                                                                                                                                                                                       | 1.233 | .        | .        | 0.0003   | 3.49E-05               | Fam98_f_m_aM            | 0/0;0/1;0/1         |
| chr16 | 67668021 | 67668021 | G | A | C16orf86 | exonic | nonsynonymous SNV | C16orf86:NM_001012984:exon3:c.G476A;p.R159H                                                                                                                                                                                                                                                                                                                                                                                                                     | 1.108 | .        | .        | 1.13E-05 | 6.98E-06               | Fam91_m_aM_dM_aM_dM     | 0/0;0/1;0/1;0/0;0/1 |
| chr16 | 67729990 | 67729990 | G | A | RANBP10  | exonic | nonsynonymous SNV | RANBP10:NM_001320238:exon7:c.C595T;p.R199C;RANBP10:NM_001320239:exon7:c.C778T;p.R260C;RANBP10:NM_020850:exon8:c.C946T;p.R316C;RANBP10:NM_001320240:exon11:c.C259T;p.R87C                                                                                                                                                                                                                                                                                        | 1.228 | .        | .        | 9.80E-05 | 2.79E-05               | Fam14_f_m_aM_aM         | 0/1;0/0;0/0;0/1     |
| chr16 | 67806443 | 67806443 | C | T | RANBP10  | exonic | nonsynonymous SNV | RANBP10:NM_001320239:exon1:c.G94A;p.E32K;RANBP10:NM_020850:exon1:c.G94A;p.E32K                                                                                                                                                                                                                                                                                                                                                                                  | 1.215 | 0.0001   | 0.0004   | 0.0003   | Fam37_f_m_aF_uM        | 0/0;0/1;0/1;0/0         |                     |
| chr16 | 67806454 | 67806454 | G | C | RANBP10  | exonic | nonsynonymous SNV | RANBP10:NM_001320239:exon1:c.C83G;p.P28R;RANBP10:NM_020850:exon1:c.C83G;p.P28R                                                                                                                                                                                                                                                                                                                                                                                  | 1.111 | .        | .        | 8.18E-05 | 6.28E-05               | Fam69_f_m_aM            | 0/1;0/0;0/1         |
| chr16 | 67945180 | 67945180 | G | A | SLC12A4  | exonic | nonsynonymous SNV | SLC12A4:NM_001145962:exon22:c.C3079T;p.L1027F;SLC12A4:NM_001145961:exon23:c.C3055T;p.L1019F;SLC12A4:NM_001145963:exon23:c.C3055T;p.L1019F;SLC12A4:NM_001145964:exon23:c.C2980T;p.L994F;SLC12A4:NM_005072:exon23:c.C3073T;p.L1025F                                                                                                                                                                                                                               | 1.032 | .        | .        | 1.25E-05 | 2.10E-05               | Fam40_f_m_aM_aM         | 0/0;0/1;0/1;0/1     |
| chr16 | 67947331 | 67947331 | C | T | SLC12A4  | exonic | nonsynonymous SNV | SLC12A4:NM_001145962:exon15:c.G2078A;p.R693Q;SLC12A4:NM_001145961:exon16:c.G2072A;p.R691Q;SLC12A4:NM_001145963:exon16:c.G2054A;p.R685Q;SLC12A4:NM_001145964:exon16:c.G1979A;p.R660Q;SLC12A4:NM_005072:exon16:c.G2072A;p.R691Q                                                                                                                                                                                                                                   | 1.078 | .        | .        | 0.0001   | 3.49E-05               | Fam64_f_m_aM            | 0/0;0/1;0/1         |
| chr16 | 68255795 | 68255795 | C | T | PLA2G15  | exonic | nonsynonymous SNV | PLA2G15:NM_012320:exon5:c.C532T;p.R178C                                                                                                                                                                                                                                                                                                                                                                                                                         | 1.331 | .        | .        | 0.0003   | 4.89E-05               | Fam80_f_m_aM_uM         | 0/1;0/0;0/1;0/1     |
| chr16 | 69109607 | 69109607 | G | A | HAS3     | exonic | nonsynonymous SNV | HAS3:NM_001199280:exon2:c.G212A;p.R71Q;HAS3:NM_05329:exon2:c.G212A;p.R71Q;HAS3:NM_138612:exon2:c.G212A;p.R71Q                                                                                                                                                                                                                                                                                                                                                   | 1.168 | 0.0006   | 0.0005   | 0.0002   | Fam75_f_m_aM           | 0/1;0/0;0/1             |                     |
| chr16 | 70251474 | 70251474 | G | C | EXOSC6   | exonic | nonsynonymous SNV | EXOSC6:NM_058219:exon1:c.C427G;p.Q143E                                                                                                                                                                                                                                                                                                                                                                                                                          | 1.2   | 7.54E-05 | .        | .        | 1.41E-05               | Fam28_f_m_aF_uF         | 0/0;0/1;0/1;0/0     |
| chr16 | 70251621 | 70251621 | C | A | EXOSC6   | exonic | nonsynonymous SNV | EXOSC6:NM_058219:exon1:c.G280T;p.G94C                                                                                                                                                                                                                                                                                                                                                                                                                           | 1.662 | .        | .        | .        | 7.21E-06               | Fam102_f_m_aM           | 0/0;0/1;0/1         |
| chr16 | 70329381 | 70329381 | C | A | DDX198   | exonic | nonsynonymous SNV | DDX198:NM_001257175:exon5:c.C244A;p.P82T;DDX198:NM_001014449:exon6:c.C370A;p.P124T;DDX198:NM_001257174:exon6:c.C370A;p.P124T;DDX198:NM_001014451:exon7:c.C604A;p.P202T;DDX198:NM_001257172:exon7:c.C619A;p.P207T;DDX198:NM_001257173:exon7:c.C370A;p.P124T;DDX198:NM_001363938:exon8:c.C712A;p.P238T;DDX198:NM_007242:exon8:c.C697A;p.P233T                                                                                                                     | 1.051 | 7.37E-05 | 3.35E-05 | 4.19E-05 | Fam60_f_m_aF           | 0/1;0/0;0/1             |                     |
| chr16 | 70544474 | 70544474 | T | C | SF3B3    | exonic | nonsynonymous SNV | SF3B3:NM_012426:exon10:c.T1270C;p.Y424H                                                                                                                                                                                                                                                                                                                                                                                                                         | 2.487 | .        | .        | .        | Fam78_f_m_aF_uM        | 0/0;0/1;0/1;0/1         |                     |
| chr16 | 72107486 | 72107486 | C | T | DHX38    | exonic | nonsynonymous SNV | DHX38:NM_014003:exon20:c.C2747T;p.P916L                                                                                                                                                                                                                                                                                                                                                                                                                         | 1.583 | .        | .        | .        | Fam65_f_m_aM_uF_dF     | 0/1;0/0;0/1;0/0;0/1     |                     |
| chr16 | 74774578 | 74774578 | C | T | FA2H     | exonic | nonsynonymous SNV | FA2H:NM_024306:exon1:c.G178A;p.A60T                                                                                                                                                                                                                                                                                                                                                                                                                             | 1.943 | .        | .        | 0.0002   | Fam22_f_m_aF_aF_uF     | 0/0;0/1;0/1;0/1;0/1     |                     |
| chr16 | 74999883 | 74999883 | T | C | ZNRF1    | exonic | nonsynonymous SNV | ZNRF1:NM_032268:exon1:c.T212C;p.L71P                                                                                                                                                                                                                                                                                                                                                                                                                            | 1.303 | .        | .        | .        | Fam69_f_m_aM           | 0/1;0/0;0/1             |                     |
| chr16 | 74999994 | 74999994 | G | C | ZNRF1    | exonic | nonsynonymous SNV | ZNRF1:NM_032268:exon1:c.G323C;p.G108A                                                                                                                                                                                                                                                                                                                                                                                                                           | 1.139 | 0.0001   | 0.0002   | 0.0001   | Fam89_f_m_aM           | 0/1;0/0;0/1             |                     |
| chr16 | 75648499 | 75648499 | C | A | TERF2IP  | exonic | nonsynonymous SNV | TERF2IP:NM_018975:exon1:c.C617A;p.S206Y                                                                                                                                                                                                                                                                                                                                                                                                                         | 1.927 | 0.0003   | 0.0001   | 0.0002   | Fam77_f_m_aM_aF_uM_uFs | 0/0;0/1;0/0;0/1;0/1;0/0 |                     |
| chr16 | 77194781 | 77194781 | C | G | MON1B    | exonic | nonsynonymous SNV | MON1B:NM_001286640:exon2:c.C484G;p.L162V;MON1B:NM_001286639:exon3:c.C595G;p.L199V;MON1B:NM_014940:exon4:c.C922G;p.L308V                                                                                                                                                                                                                                                                                                                                         | 1.105 | 7.35E-05 | 0.0002   | 7.67E-05 | Fam113_f_m_aF_raM_uF   | 0/0;0/1;0/1;0/0;0/0     |                     |
| chr16 | 83899245 | 83899245 | G | T | MLYCD    | exonic | nonsynonymous SNV | MLYCD:NM_012213:exon1:c.G101T;p.G34V                                                                                                                                                                                                                                                                                                                                                                                                                            | 1.545 | .        | .        | .        | Fam45_f_m_aM_uF        | 0/1;0/0;0/1;0/1         |                     |
| chr16 | 87343657 | 87343657 | T | C | FBXO31   | exonic | nonsynonymous SNV | FBXO31:NM_024735:exon4:c.A598G;p.K200E;FBXO31:NM_001282683:exon5:c.A82G;p.K28E                                                                                                                                                                                                                                                                                                                                                                                  | 1.532 | 7.34E-05 | 0.0001   | 4.19E-05 | Fam110_f_m_aM_aM_uMs   | 0/1;0/0;0/1;0/0;0/1     |                     |
| chr16 | 87851784 | 87851784 | C | T | SLC7A5   | exonic | nonsynonymous SNV | SLC7A5:NM_003486:exon2:c.G604A;p.A202T                                                                                                                                                                                                                                                                                                                                                                                                                          | 1.753 | .        | .        | .        | 6.98E-06               | Fam36_f_m_aM_uM         | 0/1;0/0;0/1;0/0     |
| chr16 | 88433270 | 88433270 | C | T | ZNF469   | exonic | stopgain          | ZNF469:NM_001367624:exon1:c.C5800T;p.R1934X                                                                                                                                                                                                                                                                                                                                                                                                                     | 0.552 | .        | .        | .        | Fam40_f_m_aM_aM        | 0/0;0/1;0/1;0/0         |                     |
| chr16 | 89290777 | 89290777 | G | A | ANKRD11  | exonic | nonsynonymous SNV | ANKRD11:NM_001256183:exon6:c.C449T;p.T150M;ANKRD11:NM_013275:exon6:c.C449T;p.T150M;ANKRD11:NM_001256182:exon7:c.C449T;p.T150M                                                                                                                                                                                                                                                                                                                                   | 1.991 | 7.35E-05 | 7.45E-05 | 1.40E-05 | Fam62_f_m_aM_aM        | 0/0;0/1;0/0;0/1         |                     |

|       |         |         |   |   |                 |        |                      |                                                                                                                                                                                                                                                                                                    |       |          |          |          |                      |                     |             |
|-------|---------|---------|---|---|-----------------|--------|----------------------|----------------------------------------------------------------------------------------------------------------------------------------------------------------------------------------------------------------------------------------------------------------------------------------------------|-------|----------|----------|----------|----------------------|---------------------|-------------|
| chr17 | 1437104 | 1437104 | G | A | CRK             | exonic | nonsynonymous SNV    | CRK:NM_005206:exon2:c.C293T;p.P98L,CRK:NM_016823:exon2:c.C293T;p.P98L                                                                                                                                                                                                                              | 1.86  |          |          |          |                      | Fam38_f_m_aM        | 0/0;0/1;0/1 |
| chr17 | 1538889 | 1538889 | G | C | PITPNA          | exonic | nonsynonymous SNV    | PITPNA:NM_006224:exon7:c.C436G;p.R146G                                                                                                                                                                                                                                                             | 1.889 | 0.0001   | 9.86E-05 | 2.09E-05 | Fam99_f_m_aM_aM      | 0/0;0/1;0/1;0/0     |             |
| chr17 | 1591428 | 1591428 | T | A | SLC43A2         | exonic | nonsynonymous SNV    | SLC43A2:NM_001284499:exon4:c.A361T;p.T1215,SLC43A2:NM_001284498:exon8:c.A772T;p.T258S,SLC43A2:NM_001321365:exon8:c.A772T;p.T258S,SLC43A2:NM_152346:exon8:c.A772T;p.T258S                                                                                                                           | 1.089 | 7.36E-05 | 1.12E-05 | 6.98E-06 | Fam101_f_m_aM        | 0/0;0/1;0/1         |             |
| chr17 | 1676690 | 1676690 | T | C | PRPF8           | exonic | nonsynonymous SNV    | PRPF8:NM_006445:exon16:c.A2203G;p.I735V                                                                                                                                                                                                                                                            | 1.312 |          |          |          | Fam109_f_m_aM        | 0/1;0/0;0/1         |             |
| chr17 | 1731222 | 1731222 | T | C | WDR81           | exonic | nonsynonymous SNV    | WDR81:NM_001163673:exon4:c.T512C;p.L171P,WDR81:NM_001163809:exon4:c.T4121C;p.L1374P,WDR81:NM_001163811:exon4:c.T440C;p.L147P,WDR81:NM_152348:exon5:c.T968C;p.L323P                                                                                                                                 | 1.563 |          |          |          | Fam71_f_m_aF         | 0/1;0/0;0/1         |             |
| chr17 | 2670194 | 2670194 | G | A | PAFAH1B1        | exonic | nonsynonymous SNV    | PAFAH1B1:NM_000430:exon6:c.G431A;p.R144Q                                                                                                                                                                                                                                                           | 1.59  |          |          |          | Fam15_f_m_aM_aM      | 0/0;0/0;0/0;0/1     |             |
| chr17 | 3664211 | 3664211 | C | T | TAX1BP3         | exonic | nonsynonymous SNV    | TAX1BP3:NM_014604:exon3:c.G221A;p.G74E                                                                                                                                                                                                                                                             | 1.448 | 0.0001   | 3.36E-05 | 2.79E-05 | Fam24_f_m_aM_aM      | 0/1;0/0;0/1;0/1     |             |
| chr17 | 3813159 | 3813159 | - | C | NCBP3           | exonic | frameshift insertion | NCBP3:NM_001114118:exon13:c.1747dupG;p.A583Gfs*4                                                                                                                                                                                                                                                   | 0.404 |          |          |          | Fam25_f_m_aM         | 0/0;0/1;0/1         |             |
| chr17 | 3947675 | 3947675 | C | A | ATP2A3          | exonic | nonsynonymous SNV    | ATP2A3:NM_005173:exon8:c.G811T;p.V271L,ATP2A3:NM_174953:exon8:c.G811T;p.V271L,ATP2A3:NM_174954:exon8:c.G811T;p.V271L,ATP2A3:NM_174955:exon8:c.G811T;p.V271L,ATP2A3:NM_174956:exon8:c.G811T;p.V271L,ATP2A3:NM_174957:exon8:c.G811T;p.V271L,ATP2A3:NM_174958:exon8:c.G811T;p.V271L                   | 1.463 |          | 0.0002   |          | Fam56_f_m_aF_aM      | 0/1;0/0;0/1;0/0     |             |
| chr17 | 3951265 | 3951265 | A | G | ATP2A3          | exonic | nonsynonymous SNV    | ATP2A3:NM_005173:exon5:c.T449C;p.I150T,ATP2A3:NM_174953:exon5:c.T449C;p.I150T,ATP2A3:NM_174954:exon5:c.T449C;p.I150T,ATP2A3:NM_174955:exon5:c.T449C;p.I150T,ATP2A3:NM_174956:exon5:c.T449C;p.I150T,ATP2A3:NM_174957:exon5:c.T449C;p.I150T                                                          | 1.631 | 0.0003   | 0.0002   | 0.0002   | Fam80_f_m_aM_uM      | 0/1;0/0;0/1;0/1     |             |
| chr17 | 4513256 | 4513256 | T | C | SPNS2           | exonic | nonsynonymous SNV    | SPNS2:NM_001124758:exon2:c.T380C;p.L127P                                                                                                                                                                                                                                                           | 1.29  |          |          |          | Fam122_f_m_aM        | 0/1;0/0;0/1         |             |
| chr17 | 4720429 | 4720429 | C | A | ARRB2           | exonic | nonsynonymous SNV    | ARRB2:NM_001330064:exon11:c.C462A;p.H154Q,ARRB2:NM_001257331:exon12:c.C993A;p.H331Q,ARRB2:NM_199004:exon12:c.C993A;p.H331Q,ARRB2:NM_001257328:exon13:c.C1101A;p.H367Q,ARRB2:NM_001257329:exon13:c.C907A;p.P303T,ARRB2:NM_001257330:exon13:c.C1038A;p.H346Q,ARRB2:NM_004313:exon13:c.C1038A;p.H346Q | 1.945 |          |          |          | Fam110_f_m_aM_aM_uMs | 0/0;0/1;0/0;0/1;0/0 |             |
| chr17 | 4896211 | 4896211 | C | T | MINK1           | exonic | nonsynonymous SNV    | MINK1:NM_015716:exon28:c.C3373T;p.H1125Y,MINK1:NM_001024937:exon29:c.C3424T;p.H1142Y,MINK1:NM_001321236:exon29:c.C3208T;p.H1070Y,MINK1:NM_153827:exon29:c.C3484T;p.H1162Y,MINK1:NM_170663:exon29:c.C3397T;p.H1133Y                                                                                 | 1.951 | 7.35E-05 | 6.02E-05 | 3.49E-05 | Fam12_f_m_aM_uM_aM   | 0/0;0/1;0/1;0/0;0/0 |             |
| chr17 | 5001351 | 5001351 | T | C | KIF1C           | exonic | nonsynonymous SNV    | KIF1C:NM_006612:exon5:c.T313C;p.Y105H                                                                                                                                                                                                                                                              | 1.105 |          |          |          | Fam119_f_m_aM_aM     | 0/1;0/0;0/0;0/1     |             |
| chr17 | 5438130 | 5438130 | C | T | C1QBP           | exonic | nonsynonymous SNV    | C1QBP:NM_001212:exon2:c.G376A;p.G126R                                                                                                                                                                                                                                                              | 1.141 |          | 0.0005   | 7.68E-05 | Fam86_f_m_aF         | 0/0;0/1;0/1         |             |
| chr17 | 6471163 | 6471163 | C | G | PITPNM3         | exonic | nonsynonymous SNV    | PITPNM3:NM_001165966:exon11:c.G1514C;p.R505P,PITPNM3:NM_031220:exon12:c.G1622C;p.R541P                                                                                                                                                                                                             | 1.097 |          |          | 1.40E-05 | Fam69_f_m_aM         | 0/1;0/0;0/1         |             |
| chr17 | 6483736 | 6483736 | C | T | PITPNM3         | exonic | nonsynonymous SNV    | PITPNM3:NM_001165966:exon5:c.G260A;p.R87H,PITPNM3:NM_031220:exon6:c.G368A;p.R123H                                                                                                                                                                                                                  | 1.067 | 7.35E-05 | 6.82E-05 | 6.98E-06 | Fam26_f_m_aM_uM      | 0/1;0/0;0/1;0/1     |             |
| chr17 | 7026613 | 7026613 | T | C | BCL6B           | exonic | nonsynonymous SNV    | BCL6B:NM_181844:exon6:c.T1046C;p.V349A                                                                                                                                                                                                                                                             | 1.291 | 0.0001   | 0.0001   | 2.79E-05 | Fam4_f_m_aM          | 0/1;0/0;0/1         |             |
| chr17 | 7323503 | 7323503 | T | C | NEURL4          | exonic | nonsynonymous SNV    | NEURL4:NM_001005408:exon14:c.A2399G;p.Y800C,NEURL4:NM_032442:exon14:c.A2399G;p.Y800C                                                                                                                                                                                                               | 1.589 | 0.0004   | 0.0001   | 0.0001   | Fam45_f_m_aM_uF      | 0/1;0/0;0/1;0/0     |             |
| chr17 | 7323905 | 7323905 | C | T | NEURL4          | exonic | nonsynonymous SNV    | NEURL4:NM_001005408:exon12:c.G2170A;p.G724S,NEURL4:NM_032442:exon12:c.G2170A;p.G724S                                                                                                                                                                                                               | 1.464 |          | 1.12E-05 | 6.98E-06 | Fam115_f_m_aF_aM_aF  | 0/0;0/0;0/1;0/0;0/0 |             |
| chr17 | 7344077 | 7344077 | G | A | ACAP1           | exonic | nonsynonymous SNV    | ACAP1:NM_014716:exon9:c.G698A;p.R233Q                                                                                                                                                                                                                                                              | 1.269 |          | 1.31E-05 |          | Fam116_f_m_aM_aF     | 0/0;0/1;0/1;0/1     |             |
| chr17 | 7408418 | 7408418 | C | T | NLGN2           | exonic | nonsynonymous SNV    | NLGN2:NM_020795:exon1:c.C163T;p.R55W                                                                                                                                                                                                                                                               | 2.265 |          | 4.37E-05 |          | Fam88_f_m_aF         | 0/0;0/1;0/1         |             |
| chr17 | 7415791 | 7415791 | G | A | NLGN2           | exonic | nonsynonymous SNV    | NLGN2:NM_020795:exon6:c.G1883A;p.D440N                                                                                                                                                                                                                                                             | 2.298 | 7.34E-05 | 7.82E-05 | 4.88E-05 | Fam48_f_m_aM_uM      | 0/1;0/0;0/1;0/0     |             |
| chr17 | 7417174 | 7417174 | G | A | NLGN2           | exonic | nonsynonymous SNV    | NLGN2:NM_020795:exon7:c.G1883A;p.R628H                                                                                                                                                                                                                                                             | 1.363 | 7.37E-05 | 0.0002   | 0.0002   | Fam43_f_m_aM         | 0/1;0/0;0/1         |             |
| chr17 | 7417323 | 7417323 | G | A | NLGN2           | exonic | nonsynonymous SNV    | NLGN2:NM_020795:exon7:c.G2032A;p.V678I                                                                                                                                                                                                                                                             | 2.015 |          |          |          | Fam81_f_m_aM_uM      | 0/1;0/0;0/1;0/0     |             |
| chr17 | 7446929 | 7446929 | G | A | CHRN1           | exonic | nonsynonymous SNV    | CHRN1:NM_000747:exon4:c.G340A;p.V114M                                                                                                                                                                                                                                                              | 1.236 | 0.0007   | 0.0005   | 0.0002   | Fam4_f_m_aM          | 0/0;0/1;0/1         |             |
| chr17 | 7556873 | 7556873 | C | T | TNFSF12;TNFSF12 | exonic | nonsynonymous SNV    | TNFSF12:NM_003809:exon6:c.C469T;p.R157W,TNFSF12:NM_172089:exon6:c.C469T;p.R157W                                                                                                                                                                                                                    | 1.312 | 7.35E-05 | 0.0001   | 2.79E-05 | Fam63_f_m_aF         | 0/0;0/1;0/1         |             |
| chr17 | 7777504 | 7777504 | G | A | DNAH2           | exonic | nonsynonymous SNV    | DNAH2:NM_020877:exon33:c.G5117A;p.R1706Q                                                                                                                                                                                                                                                           | 1.016 | 0.0006   | 0.0008   | 0.0002   | Fam30_f_m_aM_uM      | 0/0;0/1;0/1;0/0     |             |
| chr17 | 7819231 | 7819231 | G | A | DNAH2           | exonic | nonsynonymous SNV    | DNAH2:NM_020877:exon72:c.G10838A;p.R3613Q                                                                                                                                                                                                                                                          | 1.025 |          | 3.27E-05 | 1.40E-05 | Fam16_f_m_aM_aM      | 0/0;0/1;0/0;0/1     |             |
| chr17 | 7905904 | 7905904 | A | G | CHD3            | exonic | nonsynonymous SNV    | CHD3:NM_001005271:exon28:c.A4450G;p.M1484V,CHD3:NM_001005273:exon28:c.A4273G;p.M1425V,CHD3:NM_005852:exon28:c.A4273G;p.M1425V                                                                                                                                                                      | 1.534 |          |          |          | Fam67_f_m_aM_uF      | 0/0;0/1;0/1;0/1     |             |
| chr17 | 7910572 | 7910572 | C | T | CHD3            | exonic | nonsynonymous SNV    | CHD3:NM_001005271:exon38:c.C5912T;p.T1971M,CHD3:NM_001005273:exon38:c.C5735T;p.T1912M                                                                                                                                                                                                              | 1.224 | 0.0008   | 0.0005   | 0.0003   | Fam53_f_m_aM         | 0/1;0/0;0/1         |             |
| chr17 | 8015999 | 8015999 | T | C | GUCY2D          | exonic | nonsynonymous SNV    | GUCY2D:NM_000180:exon17:c.T3116C;p.L1039P                                                                                                                                                                                                                                                          | 1.818 |          |          | 6.98E-06 | Fam13_f_m_aM         | 0/1;0/0;0/1         |             |
| chr17 | 8542210 | 8542210 | A | G | MYH10           | exonic | nonsynonymous SNV    | MYH10:NM_005964:exon13:c.T1472C;p.M491T,MYH10:NM_001256012:exon14:c.T1502C;p.M501T,MYH10:NM_001256095:exon14:c.T1499C;p.M500T                                                                                                                                                                      | 1.122 |          |          |          | Fam72_f_m_aF_uF      | 0/0;0/1;0/1;0/1     |             |
| chr17 | 8623221 | 8623221 | T | C | MYH10           | exonic | nonsynonymous SNV    | MYH10:NM_001256012:exon2:c.A26G;p.D9G,MYH10:NM_001256095:exon2:c.A26G;p.D9G,MYH10:NM_005964:exon2:c.A26G;p.D9G                                                                                                                                                                                     | 2.4   | 7.34E-05 | 3.50E-05 | 1.40E-05 | Fam27_f_m_aF_uM_uM   | 0/1;0/0;0/1;0/1;0/1 |             |

|       |          |          |   |   |          |        |                   |                                                                                                                                                                                                                                                                                                                                                                                                                                                                                                                                                                                                                                                                                                                                                         |       |          |          |          |                      |                        |                         |
|-------|----------|----------|---|---|----------|--------|-------------------|---------------------------------------------------------------------------------------------------------------------------------------------------------------------------------------------------------------------------------------------------------------------------------------------------------------------------------------------------------------------------------------------------------------------------------------------------------------------------------------------------------------------------------------------------------------------------------------------------------------------------------------------------------------------------------------------------------------------------------------------------------|-------|----------|----------|----------|----------------------|------------------------|-------------------------|
| chr17 | 8909156  | 8909156  | C | G | PIK3R5   | exonic | nonsynonymous SNV | PIK3R5:NM_001142633:exon3:c.G122C;p.C415,PIK3R5:NM_014308:exon3:c.G122C;p.C415                                                                                                                                                                                                                                                                                                                                                                                                                                                                                                                                                                                                                                                                          | 1.38  |          |          |          |                      | Fam121_f_m_aF_aM       | 0/0;0/1;0/1;0/1         |
| chr17 | 10528976 | 10528976 | C | T | MYH2     | exonic | nonsynonymous SNV | MYH2:NM_001100112:exon27:c.G3458A;p.S1153N,MYH2:NM_017534:exon27:c.G3458A;p.S1153N                                                                                                                                                                                                                                                                                                                                                                                                                                                                                                                                                                                                                                                                      | 1.033 |          |          |          |                      | Fam77_f_m_aM_aF_uM_uFs | 0/0;0/0;0/1;0/0;0/0;0/0 |
| chr17 | 10640363 | 10640363 | C | T | MYH3     | exonic | nonsynonymous SNV | MYH3:NM_002470:exon21:c.G2396A;p.R799H                                                                                                                                                                                                                                                                                                                                                                                                                                                                                                                                                                                                                                                                                                                  | 2.1   |          | 9.80E-05 |          | 6.98E-06             | Fam25_f_m_aM           | 0/0;0/1;0/1             |
| chr17 | 10640375 | 10640375 | C | G | MYH3     | exonic | nonsynonymous SNV | MYH3:NM_002470:exon21:c.G2384C;p.G795A                                                                                                                                                                                                                                                                                                                                                                                                                                                                                                                                                                                                                                                                                                                  | 1.971 | 7.34E-05 |          | 0.0001   | 3.49E-05             | Fam4_f_m_aM            | 0/0;0/1;0/1             |
| chr17 | 10729805 | 10729805 | A | G | TMEM220  | exonic | nonsynonymous SNV | TMEM220:NM_001004313:exon1:c.T47C;p.F165,TMEM220:NM_001330139:exon1:c.T47C;p.F165,TMEM220:NM_001330140:exon1:c.T47C;p.F165,TMEM220:NM_001359647:exon1:c.T47C;p.F165                                                                                                                                                                                                                                                                                                                                                                                                                                                                                                                                                                                     | 1.525 |          |          |          |                      | Fam36_f_m_aM_uM        | 0/1;0/0;0/1;0/0         |
| chr17 | 10729806 | 10729806 | A | C | TMEM220  | exonic | nonsynonymous SNV | TMEM220:NM_001004313:exon1:c.T46G;p.F16V,TMEM220:NM_001330139:exon1:c.T46G;p.F16V,TMEM220:NM_001330140:exon1:c.T46G;p.F16V,TMEM220:NM_001359647:exon1:c.T46G;p.F16V                                                                                                                                                                                                                                                                                                                                                                                                                                                                                                                                                                                     | 1.296 |          |          |          |                      | Fam36_f_m_aM_uM        | 0/1;0/0;0/1;0/0         |
| chr17 | 12915955 | 12915955 | C | T | ARHGAP44 | exonic | nonsynonymous SNV | ARHGAP44:NM_001321164:exon5:c.C331T;p.H111Y,ARHGAP44:NM_001321166:exon5:c.C331T;p.H111Y,ARHGAP44:NM_01321167:exon5:c.C331T;p.H111Y,ARHGAP44:NM_014859:exon5:c.C331T;p.H111Y                                                                                                                                                                                                                                                                                                                                                                                                                                                                                                                                                                             | 1.449 | 7.34E-05 | 9.00E-05 | 1.40E-05 | Fam82_f_m_aM_uF      | 0/1;0/0;0/1;0/0        |                         |
| chr17 | 16064885 | 16064885 | C | G | NCOR1    | exonic | nonsynonymous SNV | NCOR1:NM_001190440:exon33:c.G5134C;p.A1712P,NCOR1:NM_006311:exon34:c.G5086C;p.A1696P                                                                                                                                                                                                                                                                                                                                                                                                                                                                                                                                                                                                                                                                    | 1.101 | 7.34E-05 | 0.0003   | 0.0002   | Fam117_f_m_aM_aF     | 0/0;0/1;0/0;0/1        |                         |
| chr17 | 16064885 | 16064885 | C | G | NCOR1    | exonic | nonsynonymous SNV | NCOR1:NM_001190440:exon33:c.G5134C;p.A1712P,NCOR1:NM_006311:exon34:c.G5086C;p.A1696P                                                                                                                                                                                                                                                                                                                                                                                                                                                                                                                                                                                                                                                                    | 1.101 | 7.34E-05 | 0.0003   | 0.0002   | Fam12_f_m_aM_uM_aM   | 0/0;0/1;0/1;0/1;0/0    |                         |
| chr17 | 16065554 | 16065554 | G | A | NCOR1    | exonic | nonsynonymous SNV | NCOR1:NM_001190440:exon32:c.C4930T;p.R1644C,NCOR1:NM_006311:exon33:c.C4882T;p.R1628C                                                                                                                                                                                                                                                                                                                                                                                                                                                                                                                                                                                                                                                                    | 1.129 | 7.34E-05 |          |          | 6.98E-06             | Fam67_f_m_aM_uF        | 0/0;0/1;0/1;0/1         |
| chr17 | 16171876 | 16171876 | C | T | NCOR1    | exonic | nonsynonymous SNV | NCOR1:NM_001190440:exon3:c.G362A;p.R121H,NCOR1:NM_006311:exon4:c.G362A;p.R121H                                                                                                                                                                                                                                                                                                                                                                                                                                                                                                                                                                                                                                                                          | 1.923 |          |          | 3.31E-05 | Fam25_f_m_aM         | 0/1;0/0;0/1            |                         |
| chr17 | 17221617 | 17221617 | G | A | FLCN     | exonic | nonsynonymous SNV | FLCN:NM_144606:exon8:c.C791T;p.A264V,FLCN:NM_144997:exon8:c.C791T;p.A264V,FLCN:NM_001353230:exon9:c.C791T;p.A264V,FLCN:NM_001353231:exon9:c.C791T;p.A264V,FLCN:NM_001353229:exon10:c.C845T;p.A282V                                                                                                                                                                                                                                                                                                                                                                                                                                                                                                                                                      | 1.145 |          |          | 9.81E-05 | 6.98E-06             | Fam75_f_m_aM           | 0/1;0/0;0/1             |
| chr17 | 17346937 | 17346937 | G | A | NT5M     | exonic | nonsynonymous SNV | NT5M:NM_020201:exon5:c.G677A;p.R226Q                                                                                                                                                                                                                                                                                                                                                                                                                                                                                                                                                                                                                                                                                                                    | 1.125 |          |          | 7.47E-05 | 6.98E-06             | Fam1_f_m_aM            | 0/0;0/1;0/1             |
| chr17 | 17813391 | 17813391 | T | T | SREBF1   | exonic | nonsynonymous SNV | SREBF1:NM_001321096:exon18:c.G3119A;p.R1040Q,SREBF1:NM_0004176:exon18:c.G3191A;p.R1064Q,SREBF1:NM_01005291:exon19:c.G3281A;p.R1094Q                                                                                                                                                                                                                                                                                                                                                                                                                                                                                                                                                                                                                     | 1.089 |          | 0.0001   | 4.89E-05 | Fam122_f_m_aM        | 0/1;0/0;0/1            |                         |
| chr17 | 18264154 | 18264154 | G | A | MIEF2    | exonic | nonsynonymous SNV | MIEF2:NM_139162:exon4:c.G755A;p.R252H,MIEF2:NM_148886:exon4:c.G788A;p.R263H                                                                                                                                                                                                                                                                                                                                                                                                                                                                                                                                                                                                                                                                             | 1.038 | 0.0003   | 0.0003   | 0.0003   | 0.0003               | Fam118_f_m_aM_aF_uM    | 0/0;0/1;0/1;0/0;0/1     |
| chr17 | 18889849 | 18889849 | G | A | PRPSAP2  | exonic | nonsynonymous SNV | PRPSAP2:NM_001243936:exon6:c.G436A;p.V146M,PRPSAP2:NM_001243941:exon6:c.G298A;p.V100M,PRPSAP2:NM_001353103:exon6:c.G298A;p.V100M,PRPSAP2:NM_001353104:exon6:c.G298A;p.V100M,PRPSAP2:NM_001243940:exon7:c.G556A;p.V186M,PRPSAP2:NM_001243942:exon7:c.G298A;p.V100M,PRPSAP2:NM_001353101:exon7:c.G556A;p.V186M,PRPSAP2:NM_001353105:exon7:c.G556A;p.V186M,PRPSAP2:NM_001353107:exon7:c.G556A;p.V186M,PRPSAP2:NM_001353096:exon8:c.G421A;p.V141M,PRPSAP2:NM_001353097:exon8:c.G421A;p.V141M,PRPSAP2:NM_001353098:exon8:c.G718A;p.V240M,PRPSAP2:NM_001353099:exon8:c.G421A;p.V141M,PRPSAP2:NM_001353100:exon8:c.G298A;p.V100M,PRPSAP2:NM_001353102:exon8:c.G556A;p.V186M,PRPSAP2:NM_001353106:exon8:c.G556A;p.V186M,PRPSAP2:NM_002767:exon8:c.G556A;p.V186M | 1.887 | 0.0001   | 0.0003   | 5.59E-05 | Fam66_f_m_aM         | 0/1;0/0;0/1            |                         |
| chr17 | 19415190 | 19415190 | C | A | RNF112   | exonic | nonsynonymous SNV | RNF112:NM_007148:exon11:c.C1279A;p.L427I                                                                                                                                                                                                                                                                                                                                                                                                                                                                                                                                                                                                                                                                                                                | 1.09  |          | 0.0001   | 1.40E-05 | Fam22_f_m_aF_aF_uF   | 0/1;0/0;0/1;0/1;0/0    |                         |
| chr17 | 27597293 | 27597293 | T | C | KSR1     | exonic | nonsynonymous SNV | KSR1:NM_001367810:exon9:c.T1325C;p.L442P,KSR1:NM_014238:exon10:c.T914C;p.L305P                                                                                                                                                                                                                                                                                                                                                                                                                                                                                                                                                                                                                                                                          | 1.495 | 7.36E-05 | 0.0005   | 7.68E-05 | Fam19_f_m_aM         | 0/0;0/1;0/1            |                         |
| chr17 | 28681890 | 28681890 | G | T | SUPT6H   | exonic | nonsynonymous SNV | SUPT6H:NM_003170:exon13:c.G1507T;p.D503Y,SUPT6H:NM_001320755:exon14:c.G1507T;p.D503Y                                                                                                                                                                                                                                                                                                                                                                                                                                                                                                                                                                                                                                                                    | 1.021 |          |          |          | Fam96_f_m_aM_uF      | 0/0;0/1;0/1;0/1        |                         |
| chr17 | 28722809 | 28722809 | T | C | RPL23A   | exonic | nonsynonymous SNV | RPL23A:NM_000984:exon3:c.T296C;p.I99T                                                                                                                                                                                                                                                                                                                                                                                                                                                                                                                                                                                                                                                                                                                   | 1.928 | 0.0005   | 0.0006   | 0.0003   | Fam95_f_m_aM_aM_uF   | 0/1;0/0;0/1;0/1;0/0    |                         |
| chr17 | 28749267 | 28749267 | G | A | TRAF4    | exonic | nonsynonymous SNV | TRAF4:NM_004295:exon7:c.G1103A;p.R368H                                                                                                                                                                                                                                                                                                                                                                                                                                                                                                                                                                                                                                                                                                                  | 1.935 |          | 7.45E-05 | 3.49E-05 | Fam63_f_m_aF         | 0/1;0/0;0/1            |                         |
| chr17 | 29577706 | 29577706 | G | A | GIT1     | exonic | nonsynonymous SNV | GIT1:NM_014030:exon10:c.C920T;p.T307I,GIT1:NM_001085454:exon11:c.C947T;p.T316I                                                                                                                                                                                                                                                                                                                                                                                                                                                                                                                                                                                                                                                                          | 1.349 |          |          |          | Fam123_f_aF          | 0/1;0/1                |                         |
| chr17 | 29610746 | 29610746 | A | G | ANKRD13B | exonic | nonsynonymous SNV | ANKRD13B:NM_152345:exon8:c.A884G;p.Q295R                                                                                                                                                                                                                                                                                                                                                                                                                                                                                                                                                                                                                                                                                                                | 1.732 |          |          |          | Fam95_f_m_aM_aM_uF   | 0/0;0/1;0/1;0/1;0/0    |                         |
| chr17 | 29611975 | 29611975 | C | T | ANKRD13B | exonic | nonsynonymous SNV | ANKRD13B:NM_152345:exon10:c.C1069T;p.R357C                                                                                                                                                                                                                                                                                                                                                                                                                                                                                                                                                                                                                                                                                                              | 2.223 | 7.35E-05 | 3.28E-05 | 6.98E-06 | Fam30_f_m_aM_uM      | 0/0;0/1;0/1;0/0        |                         |
| chr17 | 29650713 | 29650713 | T | G | SSH2     | exonic | nonsynonymous SNV | SSH2:NM_033389:exon12:c.A1086C;p.E362D,SSH2:NM_01282129:exon13:c.A1167C;p.E389D                                                                                                                                                                                                                                                                                                                                                                                                                                                                                                                                                                                                                                                                         | 1.978 |          | 1.12E-05 | 6.98E-06 | Fam17_f_m_aM_uM      | 0/0;0/1;0/1;0/0        |                         |
| chr17 | 29677698 | 29677698 | T | A | SSH2     | exonic | nonsynonymous SNV | SSH2:NM_001282131:exon5:c.A463T;p.T155S,SSH2:NM_01282130:exon6:c.A442T;p.T1485,SSH2:NM_033389:exon6:c.A442T;p.T1485,SSH2:NM_001282129:exon7:c.A523T;p.T175S                                                                                                                                                                                                                                                                                                                                                                                                                                                                                                                                                                                             | 1.736 |          |          |          | Fam110_f_m_aM_aM_uMs | 0/0;0/1;0/0;0/1;0/0    |                         |
| chr17 | 30449576 | 30449576 | G | A | CPD      | exonic | nonsynonymous SNV | CPD:NM_001199775:exon13:c.G2156A;p.R719H,CPD:NM_001304:exon13:c.G2897A;p.R966H                                                                                                                                                                                                                                                                                                                                                                                                                                                                                                                                                                                                                                                                          | 1     |          | 0.0001   | 6.99E-06 | Fam36_f_m_aM_uM      | 0/0;0/1;0/1;0/1        |                         |
| chr17 | 30926914 | 30926914 | T | C | ADAP2    | exonic | nonsynonymous SNV | ADAP2:NM_001346712:exon3:c.T331C;p.C111R,ADAP2:NM_001346714:exon3:c.T313C;p.C105R,ADAP2:NM_001346716:exon3:c.T313C;p.C105R,ADAP2:NM_018404:exon3:c.T313C;p.C105R                                                                                                                                                                                                                                                                                                                                                                                                                                                                                                                                                                                        | 1.567 |          |          |          | Fam47_f_m_aM         | 0/1;0/0;0/1            |                         |
| chr17 | 31201469 | 31201469 | A | G | NF1      | exonic | nonsynonymous SNV | NF1:NM_000267:exon11:c.A1244G;p.H415R,NF1:NM_001042492:exon11:c.A1244G;p.H415R,NF1:NM_001128147:exon11:c.A1244G;p.H415R                                                                                                                                                                                                                                                                                                                                                                                                                                                                                                                                                                                                                                 | 1.055 |          |          |          | Fam61_f_m_aM         | 0/0;0/1;0/1            |                         |



|       |          |          |   |   |           |        |                   |                                                                                                                                                                                                                     |       |       |          |          |          |                        |                         |                 |
|-------|----------|----------|---|---|-----------|--------|-------------------|---------------------------------------------------------------------------------------------------------------------------------------------------------------------------------------------------------------------|-------|-------|----------|----------|----------|------------------------|-------------------------|-----------------|
| chr17 | 31434092 | 31434092 | C | A | RAB11FIP4 | exonic | stopgain          | RAB11FIP4:NM_032932:exon3:c.C306A;p.C102X                                                                                                                                                                           | 0.5   | .     | .        | .        | .        | .                      | Fam109_f_m_aM           | 0/1;0/0;0/1     |
| chr17 | 31988443 | 31988443 | G | A | SUZ12     | exonic | nonsynonymous SNV | SUZ12:NM_001321207:exon9:c.G1078A;p.E360K,SUZ12:NM_015355:exon10:c.G1147A;p.E383K                                                                                                                                   | 1.196 | .     | .        | .        | .        | .                      | Fam54_f_m_aM_uF         | 0/0;0/1;0/1;0/0 |
| chr17 | 32288819 | 32288819 | C | T | RHBDL3    | exonic | nonsynonymous SNV | RHBDL3:NM_001363834:exon2:c.C139T;p.R47C,RHBDL3:NM_001330181:exon3:c.C298T;p.R100C,RHBDL3:NM_001363835:exon4:c.C322T;p.R108C,RHBDL3:NM_001363836:exon4:c.C28T;p.R10C,RHBDL3:NM_138328:exon4:c.C322T;p.R108C         | 1.028 | .     | .        | 0.0003   | 2.09E-05 | Fam77_f_m_aM_aF_uM_uFs | 0/1;0/0;0/1;0/1;0/1;0/0 |                 |
| chr17 | 32365414 | 32365414 | C | G | ZNF207    | exonic | nonsynonymous SNV | ZNF207:NM_003457:exon7:c.C707G;p.P236R,ZNF207:NM_001032293:exon8:c.C755G;p.P252R,ZNF207:NM_001098507:exon8:c.C755G;p.P252R                                                                                          | 1.111 | .     | .        | .        | .        | .                      | Fam101_f_m_aM           | 0/0;0/1;0/1     |
| chr17 | 33292010 | 33292010 | C | T | ASIC2     | exonic | nonsynonymous SNV | ASIC2:NM_183377:exon1:c.G106A;p.G36R                                                                                                                                                                                | 1.389 | .     | .        | .        | .        | .                      | Fam47_f_m_aM            | 0/0;0/1;0/1     |
| chr17 | 34637852 | 34637852 | G | A | TMEM132E  | exonic | nonsynonymous SNV | TMEM132E:NM_001304438:exon9:c.G2845A;p.E949K                                                                                                                                                                        | 1.163 | .     | .        | 1.16E-05 | 1.40E-05 | Fam64_f_m_aM           | 0/1;0/0;0/1             |                 |
| chr17 | 34961724 | 34961724 | G | T | ZNF830    | exonic | nonsynonymous SNV | ZNF830:NM_052857:exon1:c.G158T;p.C53F                                                                                                                                                                               | 1.527 | .     | .        | 9.80E-05 | .        | Fam73_f_m_aF_dM        | 0/1;0/0;0/1;0/1         |                 |
| chr17 | 34961747 | 34961747 | A | G | ZNF830    | exonic | nonsynonymous SNV | ZNF830:NM_052857:exon1:c.A181G;p.K61E                                                                                                                                                                               | 1.451 | .     | .        | 1.12E-05 | 2.09E-05 | Fam4_f_m_aM            | 0/1;0/0;0/1             |                 |
| chr17 | 34962634 | 34962634 | A | C | ZNF830    | exonic | nonsynonymous SNV | ZNF830:NM_052857:exon1:c.A1068C;p.E356D                                                                                                                                                                             | 1.153 | .     | .        | .        | .        | Fam116_f_m_aM_aF       | 0/0;0/1;0/1;0/1         |                 |
| chr17 | 35136183 | 35136183 | A | G | NLE1      | exonic | nonsynonymous SNV | NLE1:NM_001014445:exon8:c.T121C;p.Y41H,NLE1:NM_018096:exon9:c.T997C;p.Y333H                                                                                                                                         | 1.2   | .     | .        | .        | .        | Fam31_f_m_aM_uF        | 0/0;0/1;0/1;0/0         |                 |
| chr17 | 39175200 | 39175200 | A | T | CACNB1    | exonic | nonsynonymous SNV | CACNB1:NM_000723:exon14:c.T1790A;p.I597N                                                                                                                                                                            | 1.024 | .     | .        | .        | .        | Fam22_f_m_aF_aF_uF     | 0/1;0/0;0/1;0/1;0/1;0/0 |                 |
| chr17 | 39419878 | 39419878 | T | G | MED1      | exonic | nonsynonymous SNV | MED1:NM_004774:exon14:c.A1136C;p.D379A                                                                                                                                                                              | 1.052 | .     | .        | 3.35E-05 | .        | Fam5_f_m_aM            | 0/1;0/0;0/1             |                 |
| chr17 | 39633892 | 39633892 | G | A | PPP1R1B   | exonic | nonsynonymous SNV | PPP1R1B:NM_001242464:exon5:c.G143A;p.R48H,PPP1R1B:NM_032192:exon5:c.G251A;p.R84H,PPP1R1B:NM_181505:exon5:c.G143A;p.R48H                                                                                             | 1.369 | .     | 7.34E-05 | 6.54E-05 | 2.79E-05 | Fam106_f_m_aM          | 0/1;0/0;0/1             |                 |
| chr17 | 39715792 | 39715792 | C | T | ERBB2     | exonic | nonsynonymous SNV | ERBB2:NM_001289937:exon12:c.C1366T;p.R456C,ERBB2:NM_004448:exon12:c.C1366T;p.R456C,ERBB2:NM_001005862:exon15:c.C1276T;p.R426C,ERBB2:NM_001289938:exon15:c.C1276T;p.R426C,ERBB2:NM_001289936:exon16:c.C1321T;p.R441C | 1.305 | .     | .        | 0.0001   | 2.09E-05 | Fam80_f_m_aM_uM        | 0/0;0/1;0/1;0/0         |                 |
| chr17 | 39730199 | 39730199 | C | T | MIEN1     | exonic | nonsynonymous SNV | MIEN1:NM_001330206:exon2:c.G182A;p.G61D,MIEN1:NM_032339:exon2:c.G182A;p.G61D                                                                                                                                        | 1.292 | .     | .        | 2.32E-05 | 1.40E-05 | Fam52_f_m_aM           | 0/1;0/0;0/1             |                 |
| chr17 | 40027940 | 40027940 | A | T | MED24     | exonic | nonsynonymous SNV | MED24:NM_001079518:exon14:c.T1377A;p.N459K,MED24:NM_001267797:exon14:c.T1377A;p.N459K,MED24:NM_014815:exon15:c.T1416A;p.N472K,MED24:NM_001330211:exon16:c.T1473A;p.N491K                                            | 3.339 | .     | .        | .        | .        | Fam70_f_m_aM           | 0/0;0/1;0/1             |                 |
| chr17 | 40129538 | 40129538 | C | T | MSL1      | exonic | nonsynonymous SNV | MSL1:NM_001365919:exon3:c.C1286T;p.T429I,MSL1:NM_001365921:exon3:c.C1286T;p.T429I,MSL1:NM_001012241:exon4:c.C497T;p.T166I                                                                                           | 1.021 | .     | .        | .        | .        | Fam116_f_m_aM_aF       | 0/1;0/0;0/1;0/0         |                 |
| chr17 | 40363019 | 40363019 | G | C | GJD3      | exonic | nonsynonymous SNV | GJD3:NM_152219:exon1:c.C797G;p.A266G                                                                                                                                                                                | 2.491 | .     | .        | .        | .        | Fam70_f_m_aM           | 0/1;0/0;0/1             |                 |
| chr17 | 40363508 | 40363508 | T | C | GJD3      | exonic | nonsynonymous SNV | GJD3:NM_152219:exon1:c.A308G;p.E103G                                                                                                                                                                                | 1.452 | .     | .        | .        | .        | Fam64_f_m_aM           | 0/0;0/1;0/1             |                 |
| chr17 | 40555118 | 40555118 | C | T | CCR7      | exonic | nonsynonymous SNV | CCR7:NM_001301714:exon2:c.G572A;p.R191H,CCR7:NM_001301716:exon3:c.G743A;p.R248H,CCR7:NM_001301717:exon3:c.G743A;p.R248H,CCR7:NM_001301718:exon3:c.G743A;p.R248H,CCR7:NM_001838:exon3:c.G761A;p.R254H                | 1.104 | .     | .        | 0.0001   | .        | Fam6_f_m_aM            | 0/0;0/1;0/1             |                 |
| chr17 | 41525219 | 41525219 | G | A | KRT19     | exonic | nonsynonymous SNV | KRT19:NM_002276:exon2:c.C475T;p.R159C                                                                                                                                                                               | 1.164 | .     | 7.35E-05 | 0.0001   | 7.68E-05 | Fam67_f_m_aM_uF        | 0/0;0/1;0/1;0/1         |                 |
| chr17 | 41968488 | 41968488 | C | G | CNP       | exonic | nonsynonymous SNV | CNP:NM_001330216:exon2:c.C364G;p.Q122E,CNP:NM_033133:exon2:c.C424G;p.Q142E                                                                                                                                          | 1.408 | .     | .        | .        | .        | Fam63_f_m_aF           | 0/1;0/0;0/1             |                 |
| chr17 | 41973590 | 41973590 | C | T | CNP       | exonic | nonsynonymous SNV | CNP:NM_001330216:exon4:c.C872T;p.P291I,CNP:NM_033133:exon4:c.C932T;p.P311L                                                                                                                                          | 1.026 | .     | .        | 3.28E-05 | 1.40E-05 | Fam39_f_m_aM           | 0/0;0/1;0/1             |                 |
| chr17 | 41997236 | 41997236 | A | G | DNAJC7    | exonic | startloss         | DNAJC7:NM_001144766:exon3:c.T2C;p.M17,DNAJC7:NM_003315:exon3:c.T170C;p.M57T                                                                                                                                         | 0.393 | 0.716 | 7.36E-05 | 9.04E-05 | 6.28E-05 | Fam85_f_m_aM_aM        | 0/1;0/0;0/0;0/1         |                 |
| chr17 | 42111835 | 42111835 | T | A | DHX58     | exonic | nonsynonymous SNV | DHX58:NM_024119:exon3:c.A58T;p.I20F                                                                                                                                                                                 | 1.069 | .     | .        | .        | .        | Fam115_f_m_aF_aM_aF    | 0/0;0/1;0/1;0/1;0/0     |                 |
| chr17 | 42113734 | 42113734 | G | A | KAT2A     | exonic | nonsynonymous SNV | KAT2A:NM_021078:exon18:c.C2429T;p.P810L                                                                                                                                                                             | 2.044 | .     | .        | 3.31E-05 | 2.79E-05 | Fam109_f_m_aM          | 0/1;0/0;0/1             |                 |
| chr17 | 42201778 | 42201778 | C | T | STAT5B    | exonic | nonsynonymous SNV | STAT5B:NM_012448:exon19:c.G2324A;p.R775Q                                                                                                                                                                            | 2.023 | .     | .        | 0.0002   | 6.98E-06 | Fam15_f_m_aM_aM        | 0/1;0/0;0/1;0/0         |                 |
| chr17 | 42564465 | 42564465 | T | C | COASY     | exonic | nonsynonymous SNV | COASY:NM_025233:exon3:c.T935C;p.L312S,COASY:NM_001042529:exon4:c.T935C;p.L312S,COASY:NM_001042532:exon5:c.T1022C;p.L341S                                                                                            | 1.032 | .     | .        | 1.12E-05 | 6.98E-06 | Fam64_f_m_aM           | 0/0;0/1;0/1             |                 |
| chr17 | 42567129 | 42567129 | C | T | MLX       | exonic | nonsynonymous SNV | MLX:NM_170607:exon1:c.C5T;p.T2M,MLX:NM_198204:exon1:c.C5T;p.T2M,MLX:NM_198205:exon1:c.C5T;p.T2M                                                                                                                     | 1.028 | .     | .        | .        | .        | Fam112_f_m_aM          | 0/0;0/1;0/1             |                 |
| chr17 | 42613856 | 42613856 | C | T | TUBG1     | exonic | nonsynonymous SNV | TUBG1:NM_001070:exon8:c.C701T;p.T234I                                                                                                                                                                               | 2.198 | .     | .        | .        | .        | Fam28_f_m_aF_uF        | 0/1;0/0;0/1;0/1         |                 |
| chr17 | 42670124 | 42670124 | G | C | PLEKHH3   | exonic | nonsynonymous SNV | PLEKHH3:NM_024927:exon11:c.C1807G;p.R603G                                                                                                                                                                           | 1.82  | .     | .        | .        | 7.18E-06 | Fam114_f_m_aM          | 0/0;0/1;0/1             |                 |
| chr17 | 42680401 | 42680401 | G | C | CCR10     | exonic | nonsynonymous SNV | CCR10:NM_016602:exon2:c.C241G;p.L81V                                                                                                                                                                                | 2.26  | .     | 7.34E-05 | 0.0001   | 6.98E-05 | Fam82_f_m_aM_uF        | 0/1;0/0;0/1;0/0         |                 |
| chr17 | 42687886 | 42687886 | G | C | CNTNAP1   | exonic | nonsynonymous SNV | CNTNAP1:NM_003632:exon8:c.G1211C;p.G404A                                                                                                                                                                            | 1.078 | .     | .        | 3.27E-05 | 6.98E-06 | Fam7_f_m_aM_aM_uM      | 0/0;0/1;0/0;0/1;0/1     |                 |
| chr17 | 42688507 | 42688507 | C | T | CNTNAP1   | exonic | nonsynonymous SNV | CNTNAP1:NM_003632:exon9:c.C1352T;p.A451V                                                                                                                                                                            | 1.245 | .     | .        | .        | .        | Fam91_m_aM_dM_aM_dM    | 0/0;0/1;0/1;0/1;0/0     |                 |
| chr17 | 42692715 | 42692715 | A | G | CNTNAP1   | exonic | nonsynonymous SNV | CNTNAP1:NM_003632:exon17:c.A2747G;p.Y916C                                                                                                                                                                           | 1.036 | .     | .        | 0.0001   | 5.59E-05 | Fam21_f_m_aM_uM        | 0/1;0/0;0/1;0/1         |                 |
| chr17 | 43018696 | 43018696 | T | G | VAT1      | exonic | nonsynonymous SNV | VAT1:NM_006373:exon2:c.A491C;p.E164A                                                                                                                                                                                | 1.162 | .     | .        | .        | .        | Fam85_f_m_aM_aM        | 0/0;0/1;0/1;0/1         |                 |

|       |          |          |   |   |                 |        |                   |                                                                                                                                                                                                                                                                                                                                                                                                                                                                                                                                                                                              |       |          |          |          |                      |                     |
|-------|----------|----------|---|---|-----------------|--------|-------------------|----------------------------------------------------------------------------------------------------------------------------------------------------------------------------------------------------------------------------------------------------------------------------------------------------------------------------------------------------------------------------------------------------------------------------------------------------------------------------------------------------------------------------------------------------------------------------------------------|-------|----------|----------|----------|----------------------|---------------------|
| chr17 | 43504798 | 43504798 | C | G | DHX8            | exonic | nonsynonymous SNV | DHX8:NM_001322217:exon11:c.C1428G;p.I476M,DHX8:NM_001302623:exon12:c.C1701G;p.I567M,DHX8:NM_00132218:exon12:c.C876G;p.I292M,DHX8:NM_001322218:exon12:c.C1695G;p.I565M,DHX8:NM_001322219:exon12:c.C1701G;p.I567M,DHX8:NM_001322220:exon12:c.C1701G;p.I567M,DHX8:NM_001322221:exon12:c.C1695G;p.I565M,DHX8:NM_004941:exon12:c.C1701G;p.I567M                                                                                                                                                                                                                                                   | 2.561 |          |          |          | Fam20_f_m_aM_uF      | 0/0;0/1;0/1;0/0     |
| chr17 | 43811181 | 43811181 | T | C | MPP3            | exonic | nonsynonymous SNV | MPP3:NM_001330233:exon17:c.A1355G;p.H452R,MPP3:NM_001932:exon17:c.A1280G;p.H427R,MPP3:NM_001353080:exon18:c.A1304G;p.H435R                                                                                                                                                                                                                                                                                                                                                                                                                                                                   | 1.221 | 0.0004   | 0.0007   | 0.0003   | Fam92_f_m_aM_raM     | 0/0;0/0;0/0;0/1     |
| chr17 | 43879892 | 43879892 | G | A | MPP2            | exonic | nonsynonymous SNV | MPP2:NM_001278371:exon10:c.C1210T;p.R404C,MPP2:NM_001278373:exon10:c.C1210T;p.R404C,MPP2:NM_001278375:exon10:c.C1210T;p.R404C,MPP2:NM_001278376:exon10:c.C1210T;p.R404C,MPP2:NM_001278377:exon10:c.C1378T;p.R460C,MPP2:NM_005374:exon11:c.C1243T;p.R415C,MPP2:NM_001278372:exon12:c.C1315T;p.R439C,MPP2:NM_001278381:exon12:c.C1243T;p.R415C                                                                                                                                                                                                                                                 | 1.773 |          | 0.0001   | 6.99E-06 | Fam74_f_m_aM_uM      | 0/1;0/0;0/1;0/1     |
| chr17 | 44007460 | 44007460 | C | T | NAGS            | exonic | nonsynonymous SNV | NAGS:NM_153006:exon5:c.C1234T;p.R412C                                                                                                                                                                                                                                                                                                                                                                                                                                                                                                                                                        | 2.017 | 0.0003   | 0.0003   | 0.0001   | Fam81_f_m_aM_uM      | 0/0;0/1;0/1;0/0     |
| chr17 | 44007460 | 44007460 | C | T | NAGS            | exonic | nonsynonymous SNV | NAGS:NM_153006:exon5:c.C1234T;p.R412C                                                                                                                                                                                                                                                                                                                                                                                                                                                                                                                                                        | 2.017 | 0.0003   | 0.0003   | 0.0001   | Fam107_f_m_aM        | 0/1;0/0;0/1         |
| chr17 | 44007635 | 44007635 | G | T | NAGS            | exonic | nonsynonymous SNV | NAGS:NM_153006:exon6:c.G1313T;p.G438V                                                                                                                                                                                                                                                                                                                                                                                                                                                                                                                                                        | 2.034 |          |          |          | Fam87_f_m_aM_uM      | 0/1;0/0;0/1;0/0     |
| chr17 | 44074230 | 44074230 | G | T | G6PC3           | exonic | nonsynonymous SNV | G6PC3:NM_001319945:exon2:c.G289T;p.V97F,G6PC3:NM_138387:exon2:c.G289T;p.V97F                                                                                                                                                                                                                                                                                                                                                                                                                                                                                                                 | 1     |          |          |          | Fam106_f_m_aM        | 0/0;0/1;0/1         |
| chr17 | 44091461 | 44091461 | G | A | HDAC5           | exonic | nonsynonymous SNV | HDAC5:NM_001015053:exon11:c.C1199T;p.A400V,HDAC5:NM_005474:exon11:c.C1196T;p.A399V                                                                                                                                                                                                                                                                                                                                                                                                                                                                                                           | 1.038 |          |          |          | Fam52_f_m_aM         | 0/1;0/0;0/1         |
| chr17 | 44176980 | 44176980 | T | G | ASB16           | exonic | nonsynonymous SNV | ASB16:NM_080863:exon3:c.T812G;p.L271R                                                                                                                                                                                                                                                                                                                                                                                                                                                                                                                                                        | 1.258 |          |          |          | Fam15_f_m_aM_aM      | 0/1;0/0;0/0;0/1     |
| chr17 | 44210433 | 44210433 | G | A | UBTF            | exonic | nonsynonymous SNV | UBTF:NM_001076683:exon13:c.C1289T;p.S430L,UBTF:NM_001076684:exon13:c.C1289T;p.S430L,UBTF:NM_014233:exon14:c.C1400T;p.S467L                                                                                                                                                                                                                                                                                                                                                                                                                                                                   | 1.314 |          |          |          | Fam21_f_m_aM_uM      | 0/1;0/0;0/1;0/1     |
| chr17 | 44259173 | 44259173 | A | G | SLC4A1          | exonic | nonsynonymous SNV | SLC4A1:NM_000342:exon9:c.T866C;p.M289T                                                                                                                                                                                                                                                                                                                                                                                                                                                                                                                                                       | 1.182 |          | 3.28E-05 | 6.98E-06 | Fam65_f_m_aM_uF_dF   | 0/0;0/1;0/1;0/0;0/1 |
| chr17 | 44259320 | 44259320 | G | A | SLC4A1          | exonic | nonsynonymous SNV | SLC4A1:NM_000342:exon9:c.C719T;p.P240L                                                                                                                                                                                                                                                                                                                                                                                                                                                                                                                                                       | 1.125 | 7.35E-05 | 0.0002   | 3.49E-05 | Fam99_f_m_aM_aM      | 0/0;0/1;0/1;0/0     |
| chr17 | 44773366 | 44773366 | C | T | ADAM11          | exonic | nonsynonymous SNV | ADAM11:NM_001318933:exon11:c.C331T;p.R111W,ADAM11:NM_002390:exon11:c.C931T;p.R311W                                                                                                                                                                                                                                                                                                                                                                                                                                                                                                           | 1.258 | 0.0001   | 8.94E-05 | 0.0001   | Fam16_f_m_aM_aM      | 0/1;0/0;0/0;0/1     |
| chr17 | 44776903 | 44776903 | G | A | ADAM11          | exonic | nonsynonymous SNV | ADAM11:NM_001318933:exon20:c.G1022A;p.R341H,ADAM11:NM_002390:exon20:c.G1622A;p.R541H                                                                                                                                                                                                                                                                                                                                                                                                                                                                                                         | 1.018 |          | 3.28E-05 |          | Fam59_f_m_aF_uM      | 0/0;0/1;0/1;0/0     |
| chr17 | 44805429 | 44805429 | G | A | GJC1            | exonic | nonsynonymous SNV | GJC1:NM_001080383:exon3:c.C389T;p.T130M,GJC1:NM_005497:exon3:c.C389T;p.T130M                                                                                                                                                                                                                                                                                                                                                                                                                                                                                                                 | 1.038 |          | 9.83E-05 | 2.79E-05 | Fam15_f_m_aM_aM      | 0/0;0/1;0/1;0/1     |
| chr17 | 45149768 | 45149768 | T | G | HEXIM1          | exonic | nonsynonymous SNV | HEXIM1:NM_006460:exon1:c.T578G;p.M193R                                                                                                                                                                                                                                                                                                                                                                                                                                                                                                                                                       | 1.762 | 7.35E-05 | 0.0001   | 8.38E-05 | Fam25_f_m_aM         | 0/0;0/1;0/1         |
| chr17 | 45243961 | 45243961 | C | T | FMNL1           | exonic | nonsynonymous SNV | FMNL1:NM_005892:exon18:c.C2384T;p.P795L                                                                                                                                                                                                                                                                                                                                                                                                                                                                                                                                                      | 1.369 | 0.0006   | 0.0008   | 6.28E-05 | Fam20_f_m_aM_uF      | 0/1;0/0;0/1;0/0     |
| chr17 | 45245274 | 45245274 | C | T | FMNL1           | exonic | nonsynonymous SNV | FMNL1:NM_005892:exon22:c.C2750T;p.A917V                                                                                                                                                                                                                                                                                                                                                                                                                                                                                                                                                      | 1.506 | 0.0001   | 0.0001   | 9.07E-05 | Fam105_f_m_aM        | 0/1;0/0;0/1         |
| chr17 | 45245327 | 45245327 | C | T | FMNL1           | exonic | nonsynonymous SNV | FMNL1:NM_005892:exon22:c.C2803T;p.R935W                                                                                                                                                                                                                                                                                                                                                                                                                                                                                                                                                      | 1.587 |          | 0.0001   | 1.40E-05 | Fam65_f_m_aM_uF_dF   | 0/1;0/0;0/1;0/1;0/0 |
| chr17 | 45398035 | 45398035 | C | G | ARHGAP27        | exonic | nonsynonymous SNV | ARHGAP27:NM_001282290:exon10:c.G1756C;p.D586H,ARHGAP27:NM_199282:exon10:c.G733C;p.D245H,CRHR1:NM_001303018:exon11:c.G587A;p.R196H,CRHR1:NM_001145147:exon12:c.G992A;p.R331H,CRHR1:NM_001145148:exon12:c.G1070A;p.R357H,CRHR1:NM_001303020:exon12:c.G809A;p.R270H,LINC02210:CRHR1:NM_001303016:exon13:c.G673A;p.V225I,CRHR1:NM_004382:exon13:c.G1112A;p.R371H,CRHR1:NM_001145146:exon14:c.G1199A;p.R400H,LINC02210:CRHR1:NM_001256299:exon15:c.G587A;p.R196H,KANSL1:NM_001193466:exon10:c.A2458G;p.S820G,KANSL1:NM_015443:exon10:c.A2458G;p.S820G,KANSL1:NM_001193465:exon11:c.A2458G;p.S820G | 1.292 | 0.0001   | 0.0003   | 9.77E-05 | Fam47_f_m_aM         | 0/0;0/1;0/1         |
| chr17 | 45834628 | 45834628 | G | A | CRHR1;LINC02210 | exonic | nonsynonymous SNV | CRHR1:NM_001303016:exon13:c.G673A;p.V225I,CRHR1:NM_004382:exon13:c.G1112A;p.R371H,CRHR1:NM_001145146:exon14:c.G1199A;p.R400H,LINC02210:CRHR1:NM_001256299:exon15:c.G587A;p.R196H,KANSL1:NM_001193466:exon10:c.A2458G;p.S820G,KANSL1:NM_015443:exon10:c.A2458G;p.S820G,KANSL1:NM_001193465:exon11:c.A2458G;p.S820G                                                                                                                                                                                                                                                                            | 1.204 | 7.36E-05 | 0.0001   | 3.49E-05 | Fam14_f_m_aM_aM      | 0/0;0/1;0/0;0/1     |
| chr17 | 46038621 | 46038621 | T | C | KANSL1          | exonic | nonsynonymous SNV | NSF:NM_006178:exon14:c.G1516A;p.G506S                                                                                                                                                                                                                                                                                                                                                                                                                                                                                                                                                        | 1.148 |          | 9.38E-05 | 6.98E-06 | Fam23_f_m_aM_dF_uFs  | 0/0;0/1;0/1;0/0;0/1 |
| chr17 | 46711008 | 46711008 | G | A | NSF             | exonic | nonsynonymous SNV | NSF:NM_006178:exon14:c.G1516A;p.G506S                                                                                                                                                                                                                                                                                                                                                                                                                                                                                                                                                        | 1.148 |          | 9.38E-05 | 6.98E-06 | Fam23_f_m_aM_dF_uFs  | 0/0;0/1;0/1;0/0;0/1 |
| chr17 | 47283375 | 47283375 | C | T | ITGB3           | exonic | nonsynonymous SNV | ITGB3:NM_000212:exon3:c.C187T;p.R63C                                                                                                                                                                                                                                                                                                                                                                                                                                                                                                                                                         | 1.457 | 0.0001   | 7.45E-05 | 2.09E-05 | Fam40_f_m_aM_aM      | 0/0;0/1;0/1;0/0     |
| chr17 | 47300558 | 47300558 | T | C | ITGB3           | exonic | nonsynonymous SNV | ITGB3:NM_000212:exon12:c.T1994C;p.I665T                                                                                                                                                                                                                                                                                                                                                                                                                                                                                                                                                      | 1.37  |          | 3.28E-05 |          | Fam55_f_m_aM_aM_dM   | 0/1;0/0;0/0;0/1;0/0 |
| chr17 | 47310197 | 47310197 | G | T | ITGB3           | exonic | nonsynonymous SNV | ITGB3:NM_000212:exon15:c.G2360T;p.G787V                                                                                                                                                                                                                                                                                                                                                                                                                                                                                                                                                      | 1.398 |          | 3.35E-05 |          | Fam37_f_m_aF_uM      | 0/1;0/0;0/1;0/0     |
| chr17 | 47605523 | 47605523 | G | T | NPEPPS          | exonic | nonsynonymous SNV | NPEPPS:NM_006310:exon17:c.G2066T;p.R689L,NPEPPS:NM_001330257:exon18:c.G2054T;p.R685I                                                                                                                                                                                                                                                                                                                                                                                                                                                                                                         | 1.534 |          |          |          | Fam7_f_m_aM_aM_uM    | 0/0;0/1;0/1;0/0;0/0 |
| chr17 | 47650433 | 47650433 | G | A | KPNB1           | exonic | nonsynonymous SNV | KPNB1:NM_002265:exon2:c.G88A;p.V30M                                                                                                                                                                                                                                                                                                                                                                                                                                                                                                                                                          | 1.477 |          |          |          | Fam12_f_m_aM_uM_aM   | 0/1;0/0;0/1;0/1;0/1 |
| chr17 | 47696191 | 47696191 | C | T | TBKBP1          | exonic | nonsynonymous SNV | TBKBP1:NM_014726:exon1:c.C79T;p.P27S                                                                                                                                                                                                                                                                                                                                                                                                                                                                                                                                                         | 1.186 |          | 3.29E-05 |          | Fam43_f_m_aM         | 0/0;0/1;0/1         |
| chr17 | 47699459 | 47699459 | G | T | TBKBP1          | exonic | nonsynonymous SNV | TBKBP1:NM_014726:exon5:c.G774T;p.Q258H                                                                                                                                                                                                                                                                                                                                                                                                                                                                                                                                                       | 1.105 |          | 2.77E-05 |          | Fam85_f_m_aM_aM      | 0/0;0/1;0/1;0/1     |
| chr17 | 47848101 | 47848101 | G | T | SP6             | exonic | nonsynonymous SNV | SP6:NM_001258248:exon2:c.C329A;p.P110Q,SP6:NM_199262:exon2:c.C329A;p.P110Q                                                                                                                                                                                                                                                                                                                                                                                                                                                                                                                   | 1.432 |          |          | 6.98E-06 | Fam65_f_m_aM_uF_dF   | 0/0;0/1;0/1;0/0;0/1 |
| chr17 | 47916262 | 47916262 | C | T | SP2             | exonic | nonsynonymous SNV | SP2:NM_003110:exon3:c.C191T;p.P64L                                                                                                                                                                                                                                                                                                                                                                                                                                                                                                                                                           | 1.405 | 0.0001   | 0.0001   | 7.68E-05 | Fam120_f_m_aM_aM     | 0/1;0/0;0/1;0/0     |
| chr17 | 47916262 | 47916262 | C | T | SP2             | exonic | nonsynonymous SNV | SP2:NM_003110:exon3:c.C191T;p.P64L                                                                                                                                                                                                                                                                                                                                                                                                                                                                                                                                                           | 1.405 | 0.0001   | 0.0001   | 7.68E-05 | Fam14_f_m_aM_aM      | 0/1;0/0;0/1;0/1     |
| chr17 | 48058980 | 48058980 | G | A | NFE2L1          | exonic | nonsynonymous SNV | NFE2L1:NM_001330262:exon5:c.G1568A;p.R523H,NFE2L1:NM_001330261:exon6:c.G1625A;p.R542H,NFE2L1:NM_003204:exon6:c.G1658A;p.R553H                                                                                                                                                                                                                                                                                                                                                                                                                                                                | 1.374 | 0.0007   | 0.0006   | 0.0002   | Fam110_f_m_aM_aM_uMs | 0/0;0/1;0/1;0/0;0/0 |
| chr17 | 48608002 | 48608002 | C | G | HOXB7           | exonic | nonsynonymous SNV | HOXB7:NM_004502:exon2:c.G494C;p.R165P                                                                                                                                                                                                                                                                                                                                                                                                                                                                                                                                                        | 1.167 |          | 0.0002   |          | Fam22_f_m_aF_aF_uF   | 0/1;0/0;0/1;0/1;0/0 |
| chr17 | 48623124 | 48623124 | C | T | HOXB9           | exonic | nonsynonymous SNV | HOXB9:NM_024017:exon2:c.G529A;p.A177T                                                                                                                                                                                                                                                                                                                                                                                                                                                                                                                                                        | 1.032 | 0.0001   | 0.0003   | 0.0001   | Fam85_f_m_aM_aM      | 0/0;0/1;0/1;0/1     |

|       |          |          |   |   |         |          |                   |                                                                                                                                                                                                                                                                                                                                                                                                                                                                                                                                                                                                                                                                                                                                                                                                                                                                                                                                                                                                                                                                                                                         |           |          |          |          |                        |                         |
|-------|----------|----------|---|---|---------|----------|-------------------|-------------------------------------------------------------------------------------------------------------------------------------------------------------------------------------------------------------------------------------------------------------------------------------------------------------------------------------------------------------------------------------------------------------------------------------------------------------------------------------------------------------------------------------------------------------------------------------------------------------------------------------------------------------------------------------------------------------------------------------------------------------------------------------------------------------------------------------------------------------------------------------------------------------------------------------------------------------------------------------------------------------------------------------------------------------------------------------------------------------------------|-----------|----------|----------|----------|------------------------|-------------------------|
| chr17 | 48912894 | 48912894 | G | A | UBE2Z   | exonic   | nonsynonymous SNV | UBE2Z:NM_023079:exon3:c.G451A:p.V151M                                                                                                                                                                                                                                                                                                                                                                                                                                                                                                                                                                                                                                                                                                                                                                                                                                                                                                                                                                                                                                                                                   | . 1.589 . | .        | .        | .        | Fam65_f_m_aM_uF_dF     | 0/1;0/0;0/1;0/1;0/0     |
| chr17 | 49512954 | 49512954 | G | A | NGFR    | exonic   | nonsynonymous SNV | NGFR:NM_002507:exon6:c.G1229A:p.R410Q                                                                                                                                                                                                                                                                                                                                                                                                                                                                                                                                                                                                                                                                                                                                                                                                                                                                                                                                                                                                                                                                                   | . 1.583 . | .        | 6.72E-05 | 2.79E-05 | Fam80_f_m_aM_uM        | 0/0;0/1;0/1;0/0         |
| chr17 | 49792035 | 49792035 | - | A | KAT7    | splicing | .                 | .                                                                                                                                                                                                                                                                                                                                                                                                                                                                                                                                                                                                                                                                                                                                                                                                                                                                                                                                                                                                                                                                                                                       | 0.275 .   | 7.36E-05 | 0.0003   | 5.59E-05 | Fam70_f_m_aM           | 0/0;0/1;0/1             |
| chr17 | 50068222 | 50068222 | C | T | ITGA3   | exonic   | nonsynonymous SNV | ITGA3:NM_002204:exon4:c.C581T:p.T194M                                                                                                                                                                                                                                                                                                                                                                                                                                                                                                                                                                                                                                                                                                                                                                                                                                                                                                                                                                                                                                                                                   | . 1.131 . | .        | 9.83E-05 | 1.40E-05 | Fam84_f_m_aF           | 0/1;0/0;0/1             |
| chr17 | 50191856 | 50191856 | C | T | COL11A1 | exonic   | nonsynonymous SNV | COL11A1:NM_000088:exon31:c.G2059A:p.V687M                                                                                                                                                                                                                                                                                                                                                                                                                                                                                                                                                                                                                                                                                                                                                                                                                                                                                                                                                                                                                                                                               | . 1.494 . | .        | 3.55E-05 | .        | Fam35_f_m_aF_uM        | 0/1;0/0;0/1;0/1         |
| chr17 | 50356622 | 50356622 | G | A | XYLT2   | exonic   | nonsynonymous SNV | XYLT2:NM_022167:exon8:c.G1594A:p.A532T                                                                                                                                                                                                                                                                                                                                                                                                                                                                                                                                                                                                                                                                                                                                                                                                                                                                                                                                                                                                                                                                                  | . 1.133 . | .        | .        | .        | Fam97_f_m_aM_aF        | 0/1;0/0;0/1;0/1         |
| chr17 | 50468549 | 50468549 | C | G | CHAD    | exonic   | nonsynonymous SNV | CHAD:NM_001267:exon1:c.G265C:p.E89Q                                                                                                                                                                                                                                                                                                                                                                                                                                                                                                                                                                                                                                                                                                                                                                                                                                                                                                                                                                                                                                                                                     | . 1.2 .   | .        | 6.55E-05 | .        | Fam91_m_aM_dM_aM_dM    | 0/0;0/1;0/1;0/1;0/0     |
| chr17 | 50569291 | 50569291 | A | T | CACNA1G | exonic   | nonsynonymous SNV | CACNA1G:NM_001256324:exon3:c.A481T:p.I161F,CACNA1G:NM_001256325:exon3:c.A481T:p.I161F,CACNA1G:NM_01256326:exon3:c.A481T:p.I161F,CACNA1G:NM_001256327:exon3:c.A481T:p.I161F,CACNA1G:NM_001256328:exon3:c.A481T:p.I161F,CACNA1G:NM_001256329:exon3:c.A481T:p.I161F,CACNA1G:NM_001256330:exon3:c.A481T:p.I161F,CACNA1G:NM_001256331:exon3:c.A481T:p.I161F,CACNA1G:NM_001256332:exon3:c.A481T:p.I161F,CACNA1G:NM_01256333:exon3:c.A481T:p.I161F,CACNA1G:NM_001256334:exon3:c.A481T:p.I161F,CACNA1G:NM_001256335:exon3:c.A481T:p.I161F,CACNA1G:NM_001256336:exon3:c.A481T:p.I161F,CACNA1G:NM_001256337:exon3:c.A481T:p.I161F,CACNA1G:NM_198377:exon3:c.A481T:p.I161F,CACNA1G:NM_198378:exon3:c.A481T:p.I161F,CACNA1G:NM_198379:exon3:c.A481T:p.I161F,CACNA1G:NM_198380:exon3:c.A481T:p.I161F,CACNA1G:NM_198382:exon3:c.A481T:p.I161F,CACNA1G:NM_198383:exon3:c.A481T:p.I161F,CACNA1G:NM_198384:exon3:c.A481T:p.I161F,CACNA1G:NM_198385:exon3:c.A481T:p.I161F,CACNA1G:NM_198386:exon3:c.A481T:p.I161F,CACNA1G:NM_198387:exon3:c.A481T:p.I161F,CACNA1G:NM_198388:exon3:c.A481T:p.I161F,CACNA1G:NM_198396:exon3:c.A481T:p.I161F | . 2.84 .  | .        | 3.37E-05 | .        | Fam48_f_m_aM_uM        | 0/1;0/0;0/1;0/0         |
| chr17 | 58206479 | 58206479 | A | C | MKS1    | exonic   | nonsynonymous SNV | MKS1:NM_001321268:exon15:c.T867G:p.C289W,MKS1:NM_001165927:exon16:c.T1446G:p.C482W,MKS1:NM_017777:exon16:c.T1476G:p.C492W                                                                                                                                                                                                                                                                                                                                                                                                                                                                                                                                                                                                                                                                                                                                                                                                                                                                                                                                                                                               | . 1.052 . | .        | 4.49E-05 | 2.79E-05 | Fam83_f_m_aF           | 0/0;0/1;0/1             |
| chr17 | 58272772 | 58272772 | G | A | MPO     | exonic   | nonsynonymous SNV | MPO:NM_000250:exon10:c.C1768T:p.R590C                                                                                                                                                                                                                                                                                                                                                                                                                                                                                                                                                                                                                                                                                                                                                                                                                                                                                                                                                                                                                                                                                   | . 1.323 . | 7.35E-05 | 0.0001   | 9.07E-05 | Fam9_f_m_aM_dM_uF      | 0/1;0/0;0/1;0/0;0/0     |
| chr17 | 58358335 | 58358335 | T | C | RNF43   | exonic   | nonsynonymous SNV | RNF43:NM_001305545:exon8:c.A1060G:p.N354D,RNF43:NM_001305544:exon9:c.A1441G:p.N481D,RNF43:NM_017763:exon9:c.A1441G:p.N481D                                                                                                                                                                                                                                                                                                                                                                                                                                                                                                                                                                                                                                                                                                                                                                                                                                                                                                                                                                                              | . 1.324 . | .        | .        | .        | Fam53_f_m_aM           | 0/0;0/1;0/1             |
| chr17 | 58511501 | 58511501 | C | T | MTMR4   | exonic   | nonsynonymous SNV | MTMR4:NM_004687:exon5:c.G221A:p.R74Q                                                                                                                                                                                                                                                                                                                                                                                                                                                                                                                                                                                                                                                                                                                                                                                                                                                                                                                                                                                                                                                                                    | . 1.691 . | 7.35E-05 | 0.0002   | 5.58E-05 | Fam39_f_m_aM           | 0/1;0/0;0/1             |
| chr17 | 58521077 | 58521077 | G | A | SEPTIN4 | exonic   | nonsynonymous SNV | SEPTIN4:NM_001363803:exon9:c.C901T:p.R301W,SEPTIN4:NM_001198713:exon10:c.C1174T:p.R392W,SEPTIN4:NM_001256822:exon10:c.C757T:p.R253W,SEPTIN4:NM_004574:exon10:c.C1198T:p.R400W,SEPTIN4:NM_080416:exon10:c.C1141T:p.R381W,SEPTIN4:NM_001256782:exon11:c.C1243T:p.R415W,SEPTIN4:NM_001368771:exon12:c.C2752T:p.R918W,SEPTIN4:NM_001368772:exon12:c.C1177T:p.R393W                                                                                                                                                                                                                                                                                                                                                                                                                                                                                                                                                                                                                                                                                                                                                          | . 1.244 . | 0.0001   | 0.0003   | 0.0002   | Fam78_f_m_aF_uM        | 0/1;0/0;0/1;0/0         |
| chr17 | 58955677 | 58955677 | T | G | PPM1E   | exonic   | nonsynonymous SNV | PPM1E:NM_014906:exon2:c.T493G:p.L165V                                                                                                                                                                                                                                                                                                                                                                                                                                                                                                                                                                                                                                                                                                                                                                                                                                                                                                                                                                                                                                                                                   | . 1.854 . | .        | .        | .        | Fam24_f_m_aM_aM        | 0/1;0/0;0/1;0/1         |
| chr17 | 59605560 | 59605560 | T | G | DHX40   | exonic   | nonsynonymous SNV | DHX40:NM_001166301:exon16:c.T1855G:p.L619V,DHX40:NM_024612:exon17:c.T2086G:p.L696V                                                                                                                                                                                                                                                                                                                                                                                                                                                                                                                                                                                                                                                                                                                                                                                                                                                                                                                                                                                                                                      | . 1.435 . | .        | .        | .        | Fam55_f_m_aM_aM_dM     | 0/1;0/0;0/0;0/1;0/0     |
| chr17 | 59765035 | 59765035 | C | T | VMP1    | exonic   | nonsynonymous SNV | VMP1:NM_001329400:exon4:c.C77T:p.P26L,VMP1:NM_001329396:exon5:c.C368T:p.P123L,VMP1:NM_001329398:exon5:c.C188T:p.P63L,VMP1:NM_001329399:exon5:c.C188T:p.P63L,VMP1:NM_001329394:exon6:c.C479T:p.P160L,VMP1:NM_001329395:exon6:c.C479T:p.P160L,VMP1:NM_030938:exon6:c.C479T:p.P160L                                                                                                                                                                                                                                                                                                                                                                                                                                                                                                                                                                                                                                                                                                                                                                                                                                        | . 1.665 . | .        | .        | .        | Fam94_f_m_aM           | 0/0;0/1;0/1             |
| chr17 | 60301646 | 60301646 | A | G | USP32   | exonic   | nonsynonymous SNV | USP32:NM_032582:exon3:c.T245C:p.V82A                                                                                                                                                                                                                                                                                                                                                                                                                                                                                                                                                                                                                                                                                                                                                                                                                                                                                                                                                                                                                                                                                    | . 1.001 . | 7.34E-05 | 0.0002   | 6.98E-06 | Fam77_f_m_aM_aF_uM_uFs | 0/0;0/1;0/0;0/1;0/0;0/1 |
| chr17 | 60466371 | 60466371 | T | C | APBP2   | exonic   | nonsynonymous SNV | APBP2:NM_001282476:exon4:c.A379G:p.K127E,APBP2:NM_006380:exon5:c.A592G:p.K198E                                                                                                                                                                                                                                                                                                                                                                                                                                                                                                                                                                                                                                                                                                                                                                                                                                                                                                                                                                                                                                          | . 1.165 . | .        | 0.0007   | 6.98E-06 | Fam22_f_m_aF_aF_uF     | 0/0;0/1;0/1;0/1;0/1     |
| chr17 | 60600542 | 60600542 | G | A | PPM1D   | exonic   | nonsynonymous SNV | PPM1D:NM_003620:exon1:c.G128A:p.R43Q                                                                                                                                                                                                                                                                                                                                                                                                                                                                                                                                                                                                                                                                                                                                                                                                                                                                                                                                                                                                                                                                                    | . 1.364 . | 0.0001   | 0.0003   | 7.68E-05 | Fam102_f_m_aM          | 0/1;0/0;0/1             |
| chr17 | 60600542 | 60600542 | G | A | PPM1D   | exonic   | nonsynonymous SNV | PPM1D:NM_003620:exon1:c.G128A:p.R43Q                                                                                                                                                                                                                                                                                                                                                                                                                                                                                                                                                                                                                                                                                                                                                                                                                                                                                                                                                                                                                                                                                    | . 1.364 . | 0.0001   | 0.0003   | 7.68E-05 | Fam70_f_m_aM           | 0/1;0/0;0/1             |
| chr17 | 63418356 | 63418356 | C | G | TANC2   | exonic   | nonsynonymous SNV | TANC2:NM_025185:exon25:c.C3965G:p.P1322R                                                                                                                                                                                                                                                                                                                                                                                                                                                                                                                                                                                                                                                                                                                                                                                                                                                                                                                                                                                                                                                                                | . 1.021 . | .        | .        | .        | Fam102_f_m_aM          | 0/0;0/1;0/1             |
| chr17 | 63706670 | 63706670 | C | T | STRADA  | exonic   | nonsynonymous SNV | STRADA:NM_001003786:exon8:c.G712A:p.G238S,STRADA:NM_001165969:exon8:c.G736A:p.G246S,STRADA:NM_001165970:exon8:c.G691A:p.G231S,STRADA:NM_001363787:exon8:c.G736A:p.G246S,STRADA:NM_001363789:exon8:c.G712A:p.G238S,STRADA:NM_153335:exon8:c.G712A:p.G238S,STRADA:NM_001003788:exon9:c.G649A:p.G217S,STRADA:NM_001363790:exon9:c.G649A:p.G217S,STRADA:NM_001363791:exon9:c.G649A:p.G217S,STRADA:NM_001003787:exon10:c.G823A:p.G275S,STRADA:NM_001363786:exon10:c.G799A:p.G267S,STRADA:NM_001363788:exon10:c.G823A:n.G275S                                                                                                                                                                                                                                                                                                                                                                                                                                                                                                                                                                                                 | . 1.283 . | .        | 6.54E-05 | .        | Fam118_f_m_aM_aF_uM    | 0/0;0/1;0/0;0/1;0/1     |

|       |          |          |   |   |         |          |                   |                                                                                                                                                                                                                                                                                                                                                                                                                                                                                                                                                                                                         |       |          |                   |                     |                      |                     |
|-------|----------|----------|---|---|---------|----------|-------------------|---------------------------------------------------------------------------------------------------------------------------------------------------------------------------------------------------------------------------------------------------------------------------------------------------------------------------------------------------------------------------------------------------------------------------------------------------------------------------------------------------------------------------------------------------------------------------------------------------------|-------|----------|-------------------|---------------------|----------------------|---------------------|
| chr17 | 63707293 | 63707293 | T | C | STRADA  | exonic   | nonsynonymous SNV | STRADA:NM_001003786:exon7:c.A596G;p.Y199C,STRADA:NM_001165969:exon7:c.A620G;p.Y207C,STRADA:NM_001165970:exon7:c.A575G;p.Y192C,STRADA:NM_001363787:exon7:c.A620G;p.Y207C,STRADA:NM_001363789:exon7:c.A596G;p.Y199C,STRADA:NM_153335:exon7:c.A596G;p.Y199C,STRADA:NM_001003788:exon8:c.A533G;p.Y178C,STRADA:NM_001363790:exon8:c.A533G;p.Y178C,STRADA:NM_001363791:exon8:c.A533G;p.Y178C,STRADA:NM_001003787:exon9:c.A707G;p.Y236C,STRADA:NM_001363786:exon9:c.A683G;p.Y228C,STRADA:NM_001363788:exon9:c.A707G;p.Y236C                                                                                    | 1.412 | 1.12E-05 | Fam7_f_m_aM_aM_uM | 0/0;0/1;0/1;0/1;0/1 |                      |                     |
| chr17 | 64188359 | 64188359 | G | A | TEX2    | exonic   | nonsynonymous SNV | TEX2:NM_001288732:exon5:c.C2233T;p.R745C,TEX2:NM_001288733:exon5:c.C2233T;p.R745C,TEX2:NM_018469:exon5:c.C2254T;p.R752C                                                                                                                                                                                                                                                                                                                                                                                                                                                                                 | 1.119 | 0.0002   | 8.38E-05          | Fam12_f_m_aM_uM_aM  | 0/0;0/1;0/1;0/0;0/1  |                     |
| chr17 | 67160319 | 67160319 | T | G | HELZ    | exonic   | nonsynonymous SNV | HELZ:NM_001330447:exon17:c.A2122C;p.I708L,HELZ:NM_014877:exon17:c.A2119C;p.I707L                                                                                                                                                                                                                                                                                                                                                                                                                                                                                                                        | 1.632 |          |                   | Fam34_f_m_aM_uF     | 0/1;0/0;0/1;0/1      |                     |
| chr17 | 67178722 | 67178722 | T | C | HELZ    | exonic   | nonsynonymous SNV | HELZ:NM_001330447:exon13:c.A1367G;p.Y456C,HELZ:NM_014877:exon13:c.A1367G;p.Y456C                                                                                                                                                                                                                                                                                                                                                                                                                                                                                                                        | 1.854 | 6.47E-05 | 2.09E-05          | Fam27_f_m_aF_uM_uM  | 0/0;0/1;0/1;0/1;0/1  |                     |
| chr17 | 67342248 | 67342248 | C | T | PSMD12  | exonic   | nonsynonymous SNV | PSMD12:NM_174871:exon9:c.G1039A;p.A347T,PSMD12:NM_002816:exon10:c.G1099A;p.A367T,PSMD12:NM_00131631:exon12:c.G922A;p.A308T                                                                                                                                                                                                                                                                                                                                                                                                                                                                              | 1.545 | 7.34E-05 | 6.18E-05          | 3.49E-05            | Fam78_f_m_aF_uM      | 0/1;0/0;0/1;0/0     |
| chr17 | 68274038 | 68274038 | C | T | SLC16A6 | exonic   | nonsynonymous SNV | SLC16A6:NM_004694:exon3:c.G265A;p.G89R,SLC16A6:NM_001174166:exon4:c.G265A;p.G89R                                                                                                                                                                                                                                                                                                                                                                                                                                                                                                                        | 1.458 | 0.0004   | 0.0004            | 0.0002              | Fam27_f_m_aF_uM_uM   | 0/0;0/1;0/1;0/1;0/1 |
| chr17 | 68274038 | 68274038 | C | T | SLC16A6 | exonic   | nonsynonymous SNV | SLC16A6:NM_004694:exon3:c.G265A;p.G89R,SLC16A6:NM_001174166:exon4:c.G265A;p.G89R,ARSG:NM_001267727:exon3:c.G284A;p.R95Q,ARSG:NM_01352899:exon3:c.G284A;p.R95Q,ARSG:NM_001352900:exon3:c.G284A;p.R95Q,ARSG:NM_001352901:exon3:c.G284A;p.R95Q,ARSG:NM_001352902:exon3:c.G284A;p.R95Q,ARSG:NM_001352903:exon3:c.G284A;p.R95Q,ARSG:NM_001352904:exon3:c.G284A;p.R95Q,ARSG:NM_001352905:exon3:c.G284A;p.R95Q,ARSG:NM_001352906:exon3:c.G284A;p.R95Q,ARSG:NM_001352907:exon3:c.G284A;p.R95Q,ARSG:NM_001352909:exon3:c.G284A;p.R95Q,ARSG:NM_001352910:exon3:c.G284A;p.R95Q,ARSG:NM_014960:exon3:c.G284A;p.R95Q | 1.458 | 0.0004   | 0.0004            | 0.0002              | Fam7_f_m_aM_aM_uM    | 0/0;0/1;0/1;0/1;0/1 |
| chr17 | 68343669 | 68343669 | G | A | ARSG    | exonic   | nonsynonymous SNV | ARSG:NM_001352903:exon3:c.G284A;p.R95Q,ARSG:NM_001352904:exon3:c.G284A;p.R95Q,ARSG:NM_001352905:exon3:c.G284A;p.R95Q,ARSG:NM_001352906:exon3:c.G284A;p.R95Q,ARSG:NM_001352907:exon3:c.G284A;p.R95Q,ARSG:NM_001352909:exon3:c.G284A;p.R95Q,ARSG:NM_001352910:exon3:c.G284A;p.R95Q,ARSG:NM_014960:exon3:c.G284A;p.R95Q                                                                                                                                                                                                                                                                                    | 1.148 | 7.35E-05 | 1.12E-05          | 2.79E-05            | Fam35_f_m_aF_uM      | 0/1;0/0;0/1;0/1     |
| chr17 | 69519349 | 69519349 | C | T | MAP2K6  | exonic   | nonsynonymous SNV | MAP2K6:NM_001330450:exon5:c.C115T;p.R39W,MAP2K6:NM_002758:exon5:c.C283T;p.R95W                                                                                                                                                                                                                                                                                                                                                                                                                                                                                                                          | 2.236 | 7.34E-05 | 7.47E-05          | 2.79E-05            | Fam6_f_m_aM          | 0/0;0/1;0/1         |
| chr17 | 72122721 | 72122721 | T | A | SOX9    | exonic   | nonsynonymous SNV | SOX9:NM_000346:exon2:c.T434A;p.L145H                                                                                                                                                                                                                                                                                                                                                                                                                                                                                                                                                                    | 2.212 |          | 1.13E-05          | Fam87_f_m_aM_uM     | 0/1;0/0;0/1;0/0      |                     |
| chr17 | 73424094 | 73424094 | T | A | SDK2    | splicing |                   |                                                                                                                                                                                                                                                                                                                                                                                                                                                                                                                                                                                                         | 0.555 |          |                   | Fam101_f_m_aM       | 0/1;0/0;0/1          |                     |
| chr17 | 75321750 | 75321750 | T | C | GRB2    | exonic   | nonsynonymous SNV | GRB2:NM_203506:exon4:c.A254G;p.N85S,GRB2:NM_002086:exon5:c.A377G;p.N126S                                                                                                                                                                                                                                                                                                                                                                                                                                                                                                                                | 1.073 |          | 0.0002            | Fam92_f_m_aM_raM    | 0/0;0/0;0/0;0/1      |                     |
| chr17 | 75321750 | 75321750 | T | C | GRB2    | exonic   | nonsynonymous SNV | GRB2:NM_203506:exon4:c.A254G;p.N85S,GRB2:NM_002086:exon5:c.A377G;p.N126S                                                                                                                                                                                                                                                                                                                                                                                                                                                                                                                                | 1.073 |          | 0.0002            | Fam91_m_aM_dM_aM_dM | 0/1;0/0;0/0;0/1;0/0  |                     |
| chr17 | 75493717 | 75493717 | C | G | TMEM94  | exonic   | nonsynonymous SNV | TMEM94:NM_001321148:exon17:c.C2238G;p.F746L,TMEM94:NM_001351203:exon17:c.C2238G;p.F746L,TMEM94:NM_001321149:exon18:c.C2220G;p.F740L,TMEM94:NM_01351202:exon18:c.C2160G;p.F720L,TMEM94:NM_014738:exon18:c.C2208G;p.F736L                                                                                                                                                                                                                                                                                                                                                                                 | 1.304 |          | 3.35E-05          | 2.09E-05            | Fam98_f_m_aM         | 0/0;0/1;0/1         |
| chr17 | 75496430 | 75496430 | C | T | TMEM94  | exonic   | nonsynonymous SNV | TMEM94:NM_001321148:exon23:c.C3232T;p.R1078C,TMEM94:NM_001351203:exon23:c.C3229T;p.R1077C,TMEM94:NM_001321149:exon24:c.C3214T;p.R1072C,TMEM94:NM_001351202:exon24:c.C3154T;p.R1052C,TMEM94:NM_014738:exon24:c.C3202T;p.R1068C                                                                                                                                                                                                                                                                                                                                                                           | 1.199 |          | 6.20E-05          | 2.79E-05            | Fam101_f_m_aM        | 0/0;0/0;0/1         |
| chr17 | 75507123 | 75507123 | C | T | CASKIN2 | exonic   | nonsynonymous SNV | CASKIN2:NM_001142643:exon4:c.G5A;p.R2H,CASKIN2:NM_020753:exon5:c.G251A;p.R84H                                                                                                                                                                                                                                                                                                                                                                                                                                                                                                                           | 1.707 | 7.36E-05 | 9.97E-05          | 6.98E-06            | Fam103_f_m_aM        | 0/1;0/0;0/1         |
| chr17 | 75742587 | 75742587 | C | T | ITGB4   | exonic   | nonsynonymous SNV | ITGB4:NM_001005619:exon24:c.C2788T;p.R930W,ITGB4:NM_000213:exon25:c.C2788T;p.R930W,ITGB4:NM_001005731:exon25:c.C2788T;p.R930W,ITGB4:NM_001321123:exon25:c.C2788T;p.R930W                                                                                                                                                                                                                                                                                                                                                                                                                                | 1.002 |          | 0.0001            | 4.19E-05            | Fam31_f_m_aM_uF      | 0/0;0/1;0/1;0/0     |
| chr17 | 75754594 | 75754594 | G | A | ITGB4   | exonic   | nonsynonymous SNV | ITGB4:NM_001005619:exon32:c.G4127A;p.R1376Q,ITGB4:NM_001005731:exon33:c.G4127A;p.R1376Q,ITGB4:NM_01321123:exon33:c.G4127A;p.R1376Q,ITGB4:NM_000213:exon34:c.G4337A;p.R1446Q                                                                                                                                                                                                                                                                                                                                                                                                                             | 1.084 | 0.0001   | 7.89E-05          | 4.19E-05            | Fam103_f_m_aM        | 0/0;0/1;0/1         |
| chr17 | 75955858 | 75955858 | G | A | ACOX1   | exonic   | nonsynonymous SNV | ACOX1:NM_001185039:exon5:c.C514T;p.R172C,ACOX1:NM_004035:exon5:c.C628T;p.R210C,ACOX1:NM_007292:exon5:c.C628T;p.R210C                                                                                                                                                                                                                                                                                                                                                                                                                                                                                    | 1.942 | 7.34E-05 | 0.0001            | 6.99E-05            | Fam17_f_m_aM_uM      | 0/1;0/0;0/1;0/1     |
| chr17 | 75960313 | 75960313 | A | G | ACOX1   | exonic   | nonsynonymous SNV | ACOX1:NM_001185039:exon3:c.T218C;p.L73S,ACOX1:NM_004035:exon3:c.T332C;p.L111S                                                                                                                                                                                                                                                                                                                                                                                                                                                                                                                           | 1.901 |          |                   | Fam64_f_m_aM        | 0/1;0/0;0/1          |                     |
| chr17 | 75979058 | 75979058 | G | A | ACOX1   | exonic   | nonsynonymous SNV | ACOX1:NM_004035:exon1:c.C16T;p.R6C,ACOX1:NM_007292:exon1:c.C16T;p.R6C                                                                                                                                                                                                                                                                                                                                                                                                                                                                                                                                   | 1.307 |          | 0.0002            | 7.68E-05            | Fam24_f_m_aM_aM      | 0/1;0/0;0/0;0/1     |
| chr17 | 75979058 | 75979058 | G | A | ACOX1   | exonic   | nonsynonymous SNV | ACOX1:NM_004035:exon1:c.C16T;p.R6C,ACOX1:NM_007292:exon1:c.C16T;p.R6C                                                                                                                                                                                                                                                                                                                                                                                                                                                                                                                                   | 1.307 |          | 0.0002            | 7.68E-05            | Fam114_f_m_aM        | 0/1;0/0;0/1         |
| chr17 | 76002371 | 76002371 | G | A | CDK3    | exonic   | nonsynonymous SNV | CDK3:NM_001258:exon5:c.G439A;p.G147S                                                                                                                                                                                                                                                                                                                                                                                                                                                                                                                                                                    | 1.221 | 0.0006   | 3.28E-05          | 7.00E-06            | Fam113_f_m_aF_raM_uF | 0/0;0/0;0/0;0/1;0/0 |
| chr17 | 76070403 | 76070403 | G | A | SRP68   | exonic   | nonsynonymous SNV | SRP68:NM_001260502:exon2:c.C226T;p.R76W,SRP68:NM_014230:exon2:c.C226T;p.R76W                                                                                                                                                                                                                                                                                                                                                                                                                                                                                                                            | 1.525 |          | 6.17E-05          | Fam17_f_m_aM_uM     | 0/0;0/1;0/1;0/1      |                     |
| chr17 | 76313853 | 76313853 | C | T | PRPSAP1 | exonic   | nonsynonymous SNV | PRPSAP1:NM_001330503:exon7:c.G511A;p.G171R,PRPSAP1:NM_001366236:exon8:c.G511A;p.G171R,PRPSAP1:NM_002766:exon8:c.G820A;p.G274R                                                                                                                                                                                                                                                                                                                                                                                                                                                                           | 1.298 |          | 3.35E-05          | 6.98E-06            | Fam70_f_m_aM         | 0/1;0/0;0/1         |
| chr17 | 76391541 | 76391541 | T | C | UBE2O   | exonic   | nonsynonymous SNV | UBE2O:NM_022066:exon18:c.A3281G;p.Y1094C                                                                                                                                                                                                                                                                                                                                                                                                                                                                                                                                                                | 1.266 |          |                   | Fam37_f_m_aF_uM     | 0/1;0/0;0/1;0/0      |                     |

|       |          |          |   |   |          |        |                   |                                                                                                                                                                                                                                                                                                                                                                                                                                                                                           |       |          |          |          |                      |                     |
|-------|----------|----------|---|---|----------|--------|-------------------|-------------------------------------------------------------------------------------------------------------------------------------------------------------------------------------------------------------------------------------------------------------------------------------------------------------------------------------------------------------------------------------------------------------------------------------------------------------------------------------------|-------|----------|----------|----------|----------------------|---------------------|
| chr17 | 76926616 | 76926616 | G | A | MGAT5B   | exonic | nonsynonymous SNV | MGAT5B:NM_198955:exon9:c.G1210A:p.D404N,MGAT5B:NM_001199172:exon10:c.G1177A:p.D393N,MGAT5B:NM_144677:exon10:c.G1177A:p.D393N                                                                                                                                                                                                                                                                                                                                                              | 2.032 | .        | .        | 6.98E-06 | Fam15_f_m_aM_aM      | 0/0/0/0/1/0/0       |
| chr17 | 76940526 | 76940526 | G | A | MGAT5B   | exonic | nonsynonymous SNV | MGAT5B:NM_198955:exon12:c.G1736A:p.R579Q,MGAT5B:NM_001199172:exon13:c.G1709A:p.R570Q,MGAT5B:NM_144677:exon13:c.G1703A:p.R568Q                                                                                                                                                                                                                                                                                                                                                             | 2.136 | .        | 9.87E-05 | 6.98E-06 | Fam42_f_m_aM_uF      | 0/1/0/0/1/0/1       |
| chr17 | 77190846 | 77190846 | T | C | SEC14L1  | exonic | nonsynonymous SNV | SEC14L1:NM_001144001:exon2:c.T5C:p.F25,SEC14L1:NM_001039573:exon4:c.T107C:p.F365,SEC14L1:NM_001143999:exon4:c.T107C:p.F365,SEC14L1:NM_001143999:exon4:c.T107C:p.F365,SEC14L1:NM_0030003:exon4:c.T107C:p.F365,SEC14L1:NM_001204410:exon5:c.T107C:p.F365,SEC14L1:NM_001204408:exon6:c.T107C:p.F365                                                                                                                                                                                          | 1.905 | .        | .        | .        | Fam54_f_m_aM_uF      | 0/0/0/1/0/1/0/1     |
| chr17 | 77190924 | 77190924 | A | T | SEC14L1  | exonic | nonsynonymous SNV | SEC14L1:NM_001144001:exon2:c.A83T:p.D28V,SEC14L1:NM_001039573:exon4:c.A185T:p.D62V,SEC14L1:NM_001143999:exon4:c.A185T:p.D62V,SEC14L1:NM_001143999:exon4:c.A185T:p.D62V,SEC14L1:NM_0030003:exon4:c.A185T:p.D62V,SEC14L1:NM_001204410:exon5:c.A185T:p.D62V,SEC14L1:NM_001204408:exon6:c.A185T:p.D62V                                                                                                                                                                                        | 1.786 | .        | 2.23E-05 | 6.98E-06 | Fam113_f_m_aF_raM_uF | 0/0/0/0/0/0/1/0/0   |
| chr17 | 77488806 | 77488806 | T | T | SEPTIN9  | exonic | nonsynonymous SNV | SEPTIN9:NM_001113495:exon5:c.C868T:p.R290C,SEPTIN9:NM_001113496:exon5:c.C451T:p.R151C,SEPTIN9:NM_001293696:exon5:c.C532T:p.R178C,SEPTIN9:NM_001293697:exon5:c.C451T:p.R151C,SEPTIN9:NM_001293698:exon5:c.C451T:p.R151C,SEPTIN9:NM_001113493:exon6:c.C1183T:p.R395C,SEPTIN9:NM_001113494:exon6:c.C712T:p.R238C,SEPTIN9:NM_001293695:exon6:c.C1147T:p.R383C,SEPTIN9:NM_006640:exon6:c.C1150T:p.R384C,SEPTIN9:NM_001113491:exon7:c.C1204T:p.R402C,SEPTIN9:NM_001113492:exon7:c.C712T:p.R238C | 1.82  | .        | 7.51E-05 | 2.79E-05 | Fam101_f_m_aM        | 0/0/0/1/0/1         |
| chr17 | 78049486 | 78049486 | G | A | TNRC6C   | exonic | nonsynonymous SNV | TNRC6C:NM_001142640:exon4:c.G424A:p.G142R,TNRC6C:NM_018996:exon4:c.G424A:p.G142R                                                                                                                                                                                                                                                                                                                                                                                                          | 1.061 | 0.0007   | 0.0008   | 0.0003   | Fam80_f_m_aM_uM      | 0/0/0/1/0/1/0/1     |
| chr17 | 78049486 | 78049486 | G | A | TNRC6C   | exonic | nonsynonymous SNV | TNRC6C:NM_001142640:exon4:c.G424A:p.G142R,TNRC6C:NM_018996:exon4:c.G424A:p.G142R                                                                                                                                                                                                                                                                                                                                                                                                          | 1.061 | 0.0007   | 0.0008   | 0.0003   | Fam38_f_m_aM         | 0/1/0/0/0/1         |
| chr17 | 79047988 | 79047988 | G | A | C1QTNF1  | exonic | nonsynonymous SNV | C1QTNF1:NM_198594:exon3:c.G500A:p.R167H,C1QTNF1:NM_030968:exon4:c.G746A:p.R249H,C1QTNF1:NM_153372:exon4:c.G746A:p.R249H,C1QTNF1:NM_198593:exon4:c.G746A:p.R249H                                                                                                                                                                                                                                                                                                                           | 1.094 | 0.0004   | 0.0004   | 0.0003   | Fam19_f_m_aM         | 0/1/0/0/0/1         |
| chr17 | 80332437 | 80332437 | C | A | RNF213   | exonic | nonsynonymous SNV | RNF213:NM_001256071:exon21:c.C3949A:p.L1317M                                                                                                                                                                                                                                                                                                                                                                                                                                              | 1.059 | 7.34E-05 | 0.0002   | 7.68E-05 | Fam42_f_m_aM_uF      | 0/0/0/1/0/1/0/0     |
| chr17 | 80345918 | 80345918 | G | A | RNF213   | exonic | nonsynonymous SNV | RNF213:NM_001256071:exon29:c.G7583A:p.R2528Q                                                                                                                                                                                                                                                                                                                                                                                                                                              | 1.161 | 0.0003   | 0.0006   | 0.0001   | Fam115_f_m_aF_aM_aF  | 0/1/0/0/0/1/0/0/0/0 |
| chr17 | 80347189 | 80347189 | G | A | RNF213   | exonic | nonsynonymous SNV | RNF213:NM_001256071:exon29:c.G8854A:p.G2952R                                                                                                                                                                                                                                                                                                                                                                                                                                              | 1.185 | 0.0001   | 7.47E-05 | 4.89E-05 | Fam88_f_m_aF         | 0/1/0/0/0/1         |
| chr17 | 80473250 | 80473250 | C | G | NPTX1    | exonic | nonsynonymous SNV | NPTX1:NM_002522:exon3:c.G847C:p.V283L                                                                                                                                                                                                                                                                                                                                                                                                                                                     | 1.576 | 0.0001   | 6.56E-05 | 8.37E-05 | Fam70_f_m_aM         | 0/1/0/0/0/1         |
| chr17 | 81715482 | 81715482 | C | A | SLC25A10 | exonic | nonsynonymous SNV | SLC25A10:NM_001270888:exon3:c.C218A:p.T73N,SLC25A10:NM_001270953:exon3:c.C218A:p.T73N,SLC25A10:NM_012140:exon3:c.C218A:p.T73N                                                                                                                                                                                                                                                                                                                                                             | 1.121 | .        | .        | .        | Fam6_f_m_aM          | 0/0/0/1/0/1         |
| chr17 | 81869353 | 81869353 | A | G | ARHGDI   | exonic | nonsynonymous SNV | ARHGDI:NM_001301243:exon3:c.T463C:p.Y155H,ARHGDI:NM_001185077:exon4:c.T328C:p.Y110H,ARHGDI:NM_001185078:exon4:c.T328C:p.Y110H,ARHGDI:NM_001301241:exon4:c.T328C:p.Y110H,ARHGDI:NM_001301242:exon4:c.T328C:p.Y110H,ARHGDI:NM_004309:exon4:c.T328C:p.Y110H                                                                                                                                                                                                                                  | 1.93  | .        | .        | .        | Fam6_f_m_aM          | 0/0/0/1/0/1         |
| chr17 | 81922891 | 81922891 | C | T | MAFG     | exonic | nonsynonymous SNV | MAFG:NM_002359:exon3:c.G203A:p.C68Y,MAFG:NM_032711:exon3:c.G203A:p.C68Y                                                                                                                                                                                                                                                                                                                                                                                                                   | 2.504 | .        | .        | .        | Fam61_f_m_aM         | 0/0/0/1/0/1         |
| chr17 | 81956919 | 81956919 | G | A | NOTUM    | exonic | nonsynonymous SNV | NOTUM:NM_178493:exon7:c.C851T:p.T284M                                                                                                                                                                                                                                                                                                                                                                                                                                                     | 1.113 | 0.0003   | 0.0001   | 0.0001   | Fam106_f_m_aM        | 0/1/0/0/0/1         |
| chr17 | 81960825 | 81960825 | G | C | NOTUM    | exonic | nonsynonymous SNV | NOTUM:NM_178493:exon1:c.C85G:p.R29G                                                                                                                                                                                                                                                                                                                                                                                                                                                       | 1.503 | .        | 2.43E-05 | 1.40E-05 | Fam83_f_m_aF         | 0/0/0/1/0/1         |
| chr17 | 81960825 | 81960825 | G | C | NOTUM    | exonic | nonsynonymous SNV | NOTUM:NM_178493:exon1:c.C85G:p.R29G                                                                                                                                                                                                                                                                                                                                                                                                                                                       | 1.503 | .        | 2.43E-05 | 1.40E-05 | Fam113_f_m_aF_raM_uF | 0/0/0/1/0/1/0/0/0/0 |
| chr17 | 82050717 | 82050717 | C | G | RFNG     | exonic | nonsynonymous SNV | RFNG:NM_002917:exon3:c.G364C:p.A122P                                                                                                                                                                                                                                                                                                                                                                                                                                                      | 1.226 | .        | .        | .        | Fam97_f_m_aM_aF      | 0/1/0/0/0/0/0/1     |
| chr17 | 82418479 | 82418479 | G | A | OGFOD3   | exonic | nonsynonymous SNV | OGFOD3:NM_024648:exon1:c.C7T:p.P35,OGFOD3:NM_175902:exon1:c.C7T:p.P35                                                                                                                                                                                                                                                                                                                                                                                                                     | 1.725 | 0.0002   | 0.0002   | 9.11E-05 | Fam45_f_m_aM_uF      | 0/0/0/1/0/1/0/0     |
| chr18 | 3457467  | 3457467  | A | G | TGIF1    | exonic | nonsynonymous SNV | TGIF1:NM_001278682:exon3:c.A355G:p.K119E,TGIF1:NM_003244:exon3:c.A346G:p.K116E,TGIF1:NM_170695:exon3:c.A733G:p.K245E,TGIF1:NM_173207:exon3:c.A388G:p.K130E,TGIF1:NM_173209:exon3:c.A286G:p.K96E,TGIF1:NM_173210:exon3:c.A286G:p.K96E,TGIF1:NM_173211:exon3:c.A286G:p.K96E,TGIF1:NM_001278684:exon4:c.A346G:p.K116E,TGIF1:NM_001278686:exon4:c.A286G:p.K96E,TGIF1:NM_173208:exon4:c.A346G:p.K116E,TGIF1:NM_174886:exon4:c.A286G:p.K96E                                                     | 1.29  | .        | 1.12E-05 | .        | Fam117_f_m_aM_aF     | 0/0/0/1/0/1/0/0     |
| chr18 | 8380398  | 8380398  | G | A | PTPRM    | exonic | nonsynonymous SNV | PTPRM:NM_002845:exon27:c.G3850A:p.V1284I,PTPRM:NM_001105244:exon29:c.G3889A:p.V1297I                                                                                                                                                                                                                                                                                                                                                                                                      | 1.1   | .        | 0.0003   | .        | Fam116_f_m_aM_aF     | 0/0/0/1/0/1/0/0     |
| chr18 | 10715717 | 10715717 | C | T | PIEZO2   | exonic | nonsynonymous SNV | PIEZO2:NM_022068:exon35:c.G5015A:p.R1672K                                                                                                                                                                                                                                                                                                                                                                                                                                                 | 1.016 | .        | .        | .        | Fam63_f_m_aF         | 0/1/0/0/0/1         |
| chr18 | 10784824 | 10784824 | G | A | PIEZO2   | exonic | nonsynonymous SNV | PIEZO2:NM_022068:exon17:c.C2452T:p.L818F                                                                                                                                                                                                                                                                                                                                                                                                                                                  | 1.064 | .        | .        | .        | Fam34_f_m_aM_uF      | 0/1/0/0/0/1/0/1     |
| chr18 | 11851548 | 11851548 | T | A | CHMP1B   | exonic | nonsynonymous SNV | CHMP1B:NM_020412:exon1:c.T37A:p.F13I                                                                                                                                                                                                                                                                                                                                                                                                                                                      | 1.059 | 7.34E-05 | 4.65E-05 | 4.88E-05 | Fam87_f_m_aM_uM      | 0/0/0/1/0/1/0/0     |
| chr18 | 11851819 | 11851819 | T | G | CHMP1B   | exonic | nonsynonymous SNV | CHMP1B:NM_020412:exon1:c.T308G:p.L103W                                                                                                                                                                                                                                                                                                                                                                                                                                                    | 1.995 | .        | .        | .        | Fam80_f_m_aM_uM      | 0/0/0/1/0/1/0/1     |
| chr18 | 12308299 | 12308299 | G | C | TUBB6    | exonic | nonsynonymous SNV | TUBB6:NM_001303525:exon1:c.G7C:p.E3Q,TUBB6:NM_001303526:exon1:c.G7C:p.E3Q,TUBB6:NM_032525:exon1:c.G7C:p.E3Q,TUBB6:NM_001303524:exon2:c.G7C:p.E3Q                                                                                                                                                                                                                                                                                                                                          | 2.091 | .        | .        | 7.03E-06 | Fam87_f_m_aM_uM      | 0/1/0/0/0/1/0/1     |

|       |          |          |   |   |         |        |                   |                                                                                                                                                                                                                                                                                                                                                                                                                                                                                                                                                                                                                                                                                                                                                                                                                                                                                                                                                                                                                                                                                                                                                                                                                                                                                                                                                                                                                                                                                                                                                                                                                                                                                                                                                                                                                                                                                                                                                                                                                                                                                                                        |       |          |          |                              |                     |
|-------|----------|----------|---|---|---------|--------|-------------------|------------------------------------------------------------------------------------------------------------------------------------------------------------------------------------------------------------------------------------------------------------------------------------------------------------------------------------------------------------------------------------------------------------------------------------------------------------------------------------------------------------------------------------------------------------------------------------------------------------------------------------------------------------------------------------------------------------------------------------------------------------------------------------------------------------------------------------------------------------------------------------------------------------------------------------------------------------------------------------------------------------------------------------------------------------------------------------------------------------------------------------------------------------------------------------------------------------------------------------------------------------------------------------------------------------------------------------------------------------------------------------------------------------------------------------------------------------------------------------------------------------------------------------------------------------------------------------------------------------------------------------------------------------------------------------------------------------------------------------------------------------------------------------------------------------------------------------------------------------------------------------------------------------------------------------------------------------------------------------------------------------------------------------------------------------------------------------------------------------------------|-------|----------|----------|------------------------------|---------------------|
| chr18 | 12358723 | 12358723 | T | G | AFG3L2  | exonic | nonsynonymous SNV | AFG3L2:NM_006796:exon8:c.A973C:p.N325H                                                                                                                                                                                                                                                                                                                                                                                                                                                                                                                                                                                                                                                                                                                                                                                                                                                                                                                                                                                                                                                                                                                                                                                                                                                                                                                                                                                                                                                                                                                                                                                                                                                                                                                                                                                                                                                                                                                                                                                                                                                                                 | 2.051 | 1.12E-05 | 6.98E-06 | Fam48_f_m_aM_uM              | 0/0;0/1;0/1;0/1     |
| chr18 | 23234645 | 23234645 | G | A | CABLES1 | exonic | nonsynonymous SNV | CABLES1:NM_001100619:exon5:c.G1126A:p.A376T,CABLES1:NM_001256438:exon5:c.G145A:p.A49T,CABLES1:NM_138375:exon5:c.G331A:p.A111T,RMC1:NM_001318707:exon9:c.A560T:p.Q187L,RMC1:NM_001276342:exon10:c.A887T:p.Q296L,RMC1:NM_001318709:exon10:c.A887T:p.Q296L,RMC1:NM_001318708:exon11:c.A560T:p.Q187L,RMC1:NM_013326:exon12:c.A1031T:p.Q344L                                                                                                                                                                                                                                                                                                                                                                                                                                                                                                                                                                                                                                                                                                                                                                                                                                                                                                                                                                                                                                                                                                                                                                                                                                                                                                                                                                                                                                                                                                                                                                                                                                                                                                                                                                                | 1.238 |          |          | Fam62_f_m_aM_aM              | 0/0;0/1;0/1;0/0     |
| chr18 | 23524453 | 23524453 | A | T | RMC1    | exonic | nonsynonymous SNV | TTC39C:NM_001292030:exon4:c.C349A:p.Q117K,TTC39C:NM_001135993:exon9:c.C1270A:p.Q424K,TTC39C:NM_153211:exon9:c.C1087A:p.Q363K                                                                                                                                                                                                                                                                                                                                                                                                                                                                                                                                                                                                                                                                                                                                                                                                                                                                                                                                                                                                                                                                                                                                                                                                                                                                                                                                                                                                                                                                                                                                                                                                                                                                                                                                                                                                                                                                                                                                                                                           | 1.135 | 7.35E-05 | 6.70E-05 | Fam117_f_m_aM_aF             | 0/0;0/1;0/1;0/1     |
| chr18 | 24123917 | 24123917 | C | A | TTC39C  | exonic | nonsynonymous SNV | OSBPL1A:NM_018030:exon7:c.A478G:p.I160V,OSBPL1A:NM_001242508:exon9:c.A871G:p.I291V,OSBPL1A:NM_080597:exon21:c.A2017G:p.I673V                                                                                                                                                                                                                                                                                                                                                                                                                                                                                                                                                                                                                                                                                                                                                                                                                                                                                                                                                                                                                                                                                                                                                                                                                                                                                                                                                                                                                                                                                                                                                                                                                                                                                                                                                                                                                                                                                                                                                                                           | 1.535 |          |          | Fam110_f_m_aM_aM_uMs         | 0/0;0/1;0/0;0/1;0/0 |
| chr18 | 24178089 | 24178089 | T | C | OSBPL1A | exonic | nonsynonymous SNV | CDH2:NM_001308176:exon2:c.T85C:p.F29L,CDH2:NM_001792:exon3:c.T178C:p.F60L                                                                                                                                                                                                                                                                                                                                                                                                                                                                                                                                                                                                                                                                                                                                                                                                                                                                                                                                                                                                                                                                                                                                                                                                                                                                                                                                                                                                                                                                                                                                                                                                                                                                                                                                                                                                                                                                                                                                                                                                                                              | 1.057 | 0.0001   | 0.0001   | Fam24_f_m_aM_aM              | 0/0;0/1;0/0;0/1     |
| chr18 | 28013904 | 28013904 | A | G | CDH2    | exonic | nonsynonymous SNV | TTR:NM_000371:exon3:c.A293T:p.Y98F                                                                                                                                                                                                                                                                                                                                                                                                                                                                                                                                                                                                                                                                                                                                                                                                                                                                                                                                                                                                                                                                                                                                                                                                                                                                                                                                                                                                                                                                                                                                                                                                                                                                                                                                                                                                                                                                                                                                                                                                                                                                                     | 1.092 |          |          | Fam80_f_m_aM_uM              | 0/0;0/1;0/1;0/0     |
| chr18 | 31595212 | 31595212 | A | T | TTR     | exonic | nonsynonymous SNV | B4GALT6:NM_001330570:exon3:c.C343A:p.P115T,B4GALT6:NM_004775:exon4:c.C460A:p.P154T                                                                                                                                                                                                                                                                                                                                                                                                                                                                                                                                                                                                                                                                                                                                                                                                                                                                                                                                                                                                                                                                                                                                                                                                                                                                                                                                                                                                                                                                                                                                                                                                                                                                                                                                                                                                                                                                                                                                                                                                                                     | 1.049 |          |          | 6.98E-06 Fam26_f_m_aM_uM     | 0/1;0/0;0/1;0/1     |
| chr18 | 31645366 | 31645366 | G | T | B4GALT6 | exonic | nonsynonymous SNV | KLHL14:NM_020805:exon2:c.C710T:p.A237V                                                                                                                                                                                                                                                                                                                                                                                                                                                                                                                                                                                                                                                                                                                                                                                                                                                                                                                                                                                                                                                                                                                                                                                                                                                                                                                                                                                                                                                                                                                                                                                                                                                                                                                                                                                                                                                                                                                                                                                                                                                                                 | 1.631 | 0.0001   | 0.0002   | 0.0001 Fam45_f_m_aM_uF       | 0/0;0/1;0/1;0/0     |
| chr18 | 32769882 | 32769882 | G | A | KLHL14  | exonic | nonsynonymous SNV | KLHL14:NM_020805:exon2:c.C686G:p.P229R                                                                                                                                                                                                                                                                                                                                                                                                                                                                                                                                                                                                                                                                                                                                                                                                                                                                                                                                                                                                                                                                                                                                                                                                                                                                                                                                                                                                                                                                                                                                                                                                                                                                                                                                                                                                                                                                                                                                                                                                                                                                                 | 1.145 |          | 6.76E-05 | 5.58E-05 Fam91_m_aM_dM_aM_dM | 0/0;0/1;0/1;0/0;0/1 |
| chr18 | 32769906 | 32769906 | G | C | KLHL14  | exonic | nonsynonymous SNV | DTNA:NM_001198943:exon8:c.C827T:p.P276L,DTNA:NM_001198944:exon9:c.C713T:p.P238L,DTNA:NM_032980:exon9:c.C701T:p.P234L,DTNA:NM_001198942:exon11:c.C884T:p.P295L,DTNA:NM_001198938:exon16:c.C1577T:p.P526L,DTNA:NM_001198940:exon16:c.C1577T:p.P526L,DTNA:NM_001198939:exon17:c.C1598T:p.P533L,DTNA:NM_001390:exon17:c.C1757T:p.P586L,DTNA:NM_032975:exon17:c.C1586T:p.P529L                                                                                                                                                                                                                                                                                                                                                                                                                                                                                                                                                                                                                                                                                                                                                                                                                                                                                                                                                                                                                                                                                                                                                                                                                                                                                                                                                                                                                                                                                                                                                                                                                                                                                                                                              | 1.294 | 0.0003   | 0.0003   | 0.0002 Fam20_f_m_aM_uF       | 0/0;0/1;0/1;0/1     |
| chr18 | 34875333 | 34875333 | C | T | DTNA    | exonic | nonsynonymous SNV | RPRD1A:NM_001303413:exon1:c.C20T:p.A7V,RPRD1A:NM_018170:exon1:c.C20T:p.A7V                                                                                                                                                                                                                                                                                                                                                                                                                                                                                                                                                                                                                                                                                                                                                                                                                                                                                                                                                                                                                                                                                                                                                                                                                                                                                                                                                                                                                                                                                                                                                                                                                                                                                                                                                                                                                                                                                                                                                                                                                                             | 1.064 | 7.34E-05 | 0.0002   | 0.0001 Fam45_f_m_aM_uF       | 0/1;0/0;0/1;0/1     |
| chr18 | 36067385 | 36067385 | G | A | RPRD1A  | exonic | nonsynonymous SNV | CELFA4:NM_001025087:exon1:c.G50A:p.S17N,CELFA4:NM_01025088:exon1:c.G50A:p.S17N,CELFA4:NM_001025089:exon1:c.G50A:p.S17N,CELFA4:NM_001330603:exon1:c.G50A:p.S17N,CELFA4:NM_001353695:exon1:c.G50A:p.S17N,CELFA4:NM_001353696:exon1:c.G50A:p.S17N,CELFA4:NM_001353697:exon1:c.G50A:p.S17N,CELFA4:NM_001353698:exon1:c.G50A:p.S17N,CELFA4:NM_001353699:exon1:c.G50A:p.S17N,CELFA4:NM_001353700:exon1:c.G50A:p.S17N,CELFA4:NM_001353701:exon1:c.G50A:p.S17N,CELFA4:NM_001353702:exon1:c.G50A:p.S17N,CELFA4:NM_001353703:exon1:c.G50A:p.S17N,CELFA4:NM_001353705:exon1:c.G50A:p.S17N,CELFA4:NM_001353706:exon1:c.G50A:p.S17N,CELFA4:NM_001353707:exon1:c.G50A:p.S17N,CELFA4:NM_001353708:exon1:c.G50A:p.S17N,CELFA4:NM_001353709:exon1:c.G50A:p.S17N,CELFA4:NM_001353710:exon1:c.G50A:p.S17N,CELFA4:NM_001353711:exon1:c.G50A:p.S17N,CELFA4:NM_001353712:exon1:c.G50A:p.S17N,CELFA4:NM_001353713:exon1:c.G50A:p.S17N,CELFA4:NM_001353714:exon1:c.G50A:p.S17N,CELFA4:NM_001353715:exon1:c.G50A:p.S17N,CELFA4:NM_001353716:exon1:c.G50A:p.S17N,CELFA4:NM_001353717:exon1:c.G50A:p.S17N,CELFA4:NM_001353718:exon1:c.G50A:p.S17N,CELFA4:NM_001353719:exon1:c.G50A:p.S17N,CELFA4:NM_001353720:exon1:c.G50A:p.S17N,CELFA4:NM_001353721:exon1:c.G50A:p.S17N,CELFA4:NM_001353722:exon1:c.G50A:p.S17N,CELFA4:NM_001353723:exon1:c.G50A:p.S17N,CELFA4:NM_001353724:exon1:c.G50A:p.S17N,CELFA4:NM_001353725:exon1:c.G50A:p.S17N,CELFA4:NM_001353726:exon1:c.G50A:p.S17N,CELFA4:NM_001353727:exon1:c.G50A:p.S17N,CELFA4:NM_001353728:exon1:c.G50A:p.S17N,CELFA4:NM_001353729:exon1:c.G50A:p.S17N,CELFA4:NM_001353730:exon1:c.G50A:p.S17N,CELFA4:NM_001353731:exon1:c.G50A:p.S17N,CELFA4:NM_001353732:exon1:c.G50A:p.S17N,CELFA4:NM_001353733:exon1:c.G50A:p.S17N,CELFA4:NM_001353734:exon1:c.G50A:p.S17N,CELFA4:NM_001353735:exon1:c.G50A:p.S17N,CELFA4:NM_001353736:exon1:c.G50A:p.S17N,CELFA4:NM_001353737:exon1:c.G50A:p.S17N,CELFA4:NM_001353738:exon1:c.G50A:p.S17N,CELFA4:NM_001353739:exon1:c.G50A:p.S17N,CELFA4:NM_001353740:exon1:c.G50A:p.S17N,CELFA4:NM_001353741:exon1:c.G50A:p.S17N,CELFA4:NM_001353742:exon2:c.T87A:p.H29Q | 1.568 | 3.57E-05 | 1.40E-05 | Fam89_f_m_aM                 | 0/0;0/1;0/1         |
| chr18 | 37565592 | 37565592 | C | T | CELFA4  | exonic | nonsynonymous SNV | RNF165:NM_152470:exon3:c.G392A:p.R131H                                                                                                                                                                                                                                                                                                                                                                                                                                                                                                                                                                                                                                                                                                                                                                                                                                                                                                                                                                                                                                                                                                                                                                                                                                                                                                                                                                                                                                                                                                                                                                                                                                                                                                                                                                                                                                                                                                                                                                                                                                                                                 | 1.136 |          |          | Fam88_f_m_aF                 | 0/1;0/0;0/1         |
| chr18 | 46433215 | 46433215 | T | A | RNF165  | exonic | nonsynonymous SNV |                                                                                                                                                                                                                                                                                                                                                                                                                                                                                                                                                                                                                                                                                                                                                                                                                                                                                                                                                                                                                                                                                                                                                                                                                                                                                                                                                                                                                                                                                                                                                                                                                                                                                                                                                                                                                                                                                                                                                                                                                                                                                                                        | 1.59  | 7.36E-05 | 1.22E-05 | Fam62_f_m_aM_aM              | 0/0;0/1;0/1;0/1     |
| chr18 | 46435303 | 46435303 | G | A | RNF165  | exonic | nonsynonymous SNV |                                                                                                                                                                                                                                                                                                                                                                                                                                                                                                                                                                                                                                                                                                                                                                                                                                                                                                                                                                                                                                                                                                                                                                                                                                                                                                                                                                                                                                                                                                                                                                                                                                                                                                                                                                                                                                                                                                                                                                                                                                                                                                                        | 1.695 | 7.36E-05 | 0.0003   | 1.40E-05 Fam35_f_m_aF_uM     | 0/0;0/1;0/1;0/0     |

|       |          |          |   |   |        |        |                   |                                                                                                                                                                                                                                                                                                                                                                                                                                                                                                                                                                                                                                                                                                                                                                                                                                                                                  |       |          |                                  |                     |
|-------|----------|----------|---|---|--------|--------|-------------------|----------------------------------------------------------------------------------------------------------------------------------------------------------------------------------------------------------------------------------------------------------------------------------------------------------------------------------------------------------------------------------------------------------------------------------------------------------------------------------------------------------------------------------------------------------------------------------------------------------------------------------------------------------------------------------------------------------------------------------------------------------------------------------------------------------------------------------------------------------------------------------|-------|----------|----------------------------------|---------------------|
| chr18 | 46890997 | 46890997 | G | A | PIAS2  | exonic | nonsynonymous SNV | PIAS2:NM_001324058:exon2:c.C82T;p.R28W,PIAS2:NM_01324060:exon2:c.C94T;p.R32W,PIAS2:NM_001354034:exon2:c.C82T;p.R28W,PIAS2:NM_004671:exon2:c.C82T;p.R28W,PIAS2:NM_173206:exon2:c.C82T;p.R28W,PIAS2:NM_01324047:exon3:c.C55T;p.R19W,PIAS2:NM_001324051:exon3:c.C55T;p.R19W,PIAS2:NM_001324054:exon3:c.C55T;p.R19W,PIAS2:NM_001354036:exon3:c.C55T;p.R19W,PIAS2:NM_001354037:exon3:c.C55T;p.R19W,PIAS2:NM_001324046:exon4:c.C55T;p.R19W,PIAS2:NM_001324048:exon4:c.C55T;p.R19W,PIAS2:NM_001324055:exon4:c.C55T;p.R19W,PIAS2:NM_001324059:exon4:c.C55T;p.R19W,PIAS2:NM_01354033:exon4:c.C55T;p.R19W,PIAS2:NM_001354039:exon4:c.C55T;p.R19W,PIAS2:NM_001324049:exon5:c.C55T;p.R19W,PIAS2:NM_001324052:exon5:c.C55T;p.R19W,PIAS2:NM_001324053:exon5:c.C55T;p.R19W,PIAS2:NM_001324057:exon5:c.C55T;p.R19W,PIAS2:NM_001354035:exon5:c.C55T;p.R19W,PIAS2:NM_001354038:exon5:c.C55T;p.R19W | 1.071 | 6.40E-05 | Fam91_m_aM_dM_aM_dM              | 0/0;0/0;0/0;0/1;0/0 |
| chr18 | 47247568 | 47247568 | C | T | SKOR2  | exonic | nonsynonymous SNV | SKOR2:NM_001278063:exon2:c.G1616A;p.G539D                                                                                                                                                                                                                                                                                                                                                                                                                                                                                                                                                                                                                                                                                                                                                                                                                                        | 1.215 |          | Fam36_f_m_aM_uM                  | 0/0;0/1;0/1;0/1     |
| chr18 | 47248859 | 47248859 | G | A | SKOR2  | exonic | nonsynonymous SNV | SKOR2:NM_001037802:exon2:c.C325T;p.P109S,SKOR2:NM_001278063:exon2:c.C325T;p.P109S                                                                                                                                                                                                                                                                                                                                                                                                                                                                                                                                                                                                                                                                                                                                                                                                | 2.128 |          | Fam63_f_m_aF                     | 0/0;0/1;0/1         |
| chr18 | 48040120 | 48040120 | C | T | ZBTB7C | exonic | nonsynonymous SNV | ZBTB7C:NM_001039360:exon2:c.G988A;p.D330N,ZBTB7C:NM_001318841:exon4:c.G988A;p.D330N,ZBTB7C:NM_001371286:exon4:c.G988A;p.D330N,ZBTB7C:NM_001371288:exon4:c.G988A;p.D330N,ZBTB7C:NM_001371285:exon5:c.G988A;p.D330N,ZBTB7C:NM_001371287:exon5:c.G988A;p.D330N,ZBTB7C:NM_001371284:exon6:c.G988A;p.D330N,ZBTB7C:NM_001371291:exon6:c.G988A;p.D330N,ZBTB7C:NM_001371290:exon9:c.G988A;p.D330N                                                                                                                                                                                                                                                                                                                                                                                                                                                                                        | 1.218 | 7.46E-05 | 1.40E-05 Fam1_f_m_aM             | 0/0;0/1;0/1         |
| chr18 | 48040381 | 48040381 | C | T | ZBTB7C | exonic | nonsynonymous SNV | ZBTB7C:NM_001039360:exon2:c.G727A;p.D243N,ZBTB7C:NM_001318841:exon4:c.G727A;p.D243N,ZBTB7C:NM_001371286:exon4:c.G727A;p.D243N,ZBTB7C:NM_001371288:exon4:c.G727A;p.D243N,ZBTB7C:NM_001371285:exon5:c.G727A;p.D243N,ZBTB7C:NM_001371287:exon5:c.G727A;p.D243N,ZBTB7C:NM_001371284:exon6:c.G727A;p.D243N,ZBTB7C:NM_001371291:exon6:c.G727A;p.D243N,ZBTB7C:NM_001371290:exon9:c.G727A;p.D243N                                                                                                                                                                                                                                                                                                                                                                                                                                                                                        | 1.189 | 0.0002   | 0.0001 Fam118_f_m_aM_aF_uM       | 0/0;0/1;0/1;0/0;0/1 |
| chr18 | 48040867 | 48040867 | G | C | ZBTB7C | exonic | nonsynonymous SNV | ZBTB7C:NM_001039360:exon2:c.C241G;p.Q81E,ZBTB7C:NM_001318841:exon4:c.C241G;p.Q81E,ZBTB7C:NM_001371286:exon4:c.C241G;p.Q81E,ZBTB7C:NM_001371288:exon4:c.C241G;p.Q81E,ZBTB7C:NM_001371285:exon5:c.C241G;p.Q81E,ZBTB7C:NM_001371287:exon5:c.C241G;p.Q81E,ZBTB7C:NM_001371284:exon6:c.C241G;p.Q81E,ZBTB7C:NM_001371291:exon6:c.C241G;p.Q81E,ZBTB7C:NM_001371290:exon9:c.C241G;p.Q81E                                                                                                                                                                                                                                                                                                                                                                                                                                                                                                 | 1.147 |          | Fam80_f_m_aM_uM                  | 0/0;0/1;0/1;0/1     |
| chr18 | 48950327 | 48950327 | C | T | SMAD7  | exonic | nonsynonymous SNV | SMAD7:NM_001190821:exon1:c.G98A;p.G33E,SMAD7:NM_005904:exon1:c.G98A;p.G33E                                                                                                                                                                                                                                                                                                                                                                                                                                                                                                                                                                                                                                                                                                                                                                                                       | 1.312 | 0.0002   | 6.99E-06 Fam95_f_m_aM_aM_uF      | 0/1;0/0;0/1;0/1;0/0 |
| chr18 | 50274338 | 50274338 | G | T | MBD1   | exonic | nonsynonymous SNV | MBD1:NM_001204141:exon10:c.C844A;p.R282S,MBD1:NM_001204151:exon10:c.C925A;p.R309S,MBD1:NM_001323953:exon10:c.C418A;p.R140S,MBD1:NM_015845:exon10:c.C925A;p.R309S,MBD1:NM_015847:exon10:c.C847A;p.R282S,MBD1:NM_001204136:exon11:c.C994A;p.R332S,MBD1:NM_001204139:exon11:c.C994A;p.R332S,MBD1:NM_001204142:exon11:c.C994A;p.R332S,MBD1:NM_001323950:exon11:c.C991A;p.R331S,MBD1:NM_001323951:exon11:c.C994A;p.R332S,MBD1:NM_015846:exon11:c.C994A;p.R332S,MBD1:NM_001204137:exon12:c.C1069A;p.R357S,MBD1:NM_001204138:exon12:c.C1069A;p.R357S,MBD1:NM_01323942:exon12:c.C1069A;p.R357S,MBD1:NM_001323947:exon12:c.C1069A;p.R357S,MBD1:NM_001323949:exon12:c.C562A;p.R188S                                                                                                                                                                                                        | 1.334 | 2.28E-05 | Fam113_f_m_aF_raM_uF             | 0/0;0/0;0/0;0/1;0/0 |
| chr18 | 50282702 | 50282702 | T | C | CXXC1  | exonic | nonsynonymous SNV | CXXC1:NM_001101654:exon15:c.A1874G;p.N625S,CXXC1:NM_014593:exon15:c.A1862G;p.N621S                                                                                                                                                                                                                                                                                                                                                                                                                                                                                                                                                                                                                                                                                                                                                                                               | 2.355 | 2.23E-05 | Fam74_f_m_aM_uM                  | 0/1;0/0;0/1;0/1     |
| chr18 | 50285208 | 50285208 | G | A | CXXC1  | exonic | nonsynonymous SNV | CXXC1:NM_001101654:exon7:c.C706T;p.R236C,CXXC1:NM_014593:exon7:c.C706T;p.R236C                                                                                                                                                                                                                                                                                                                                                                                                                                                                                                                                                                                                                                                                                                                                                                                                   | 1.096 | 7.35E-05 | 0.0001 2.09E-05 Fam98_f_m_aM     | 0/0;0/1;0/1         |
| chr18 | 50920554 | 50920554 | A | G | ME2    | exonic | nonsynonymous SNV | ME2:NM_001168335:exon8:c.A833G;p.D278G,ME2:NM_02396:exon8:c.A833G;p.D278G                                                                                                                                                                                                                                                                                                                                                                                                                                                                                                                                                                                                                                                                                                                                                                                                        | 1.184 |          | Fam51_f_m_aM_uF                  | 0/1;0/0;0/1;0/0     |
| chr18 | 56756676 | 56756676 | G | A | WDR7   | exonic | nonsynonymous SNV | WDR7:NM_015285:exon15:c.G2083A;p.V695M,WDR7:NM_052834:exon15:c.G2083A;p.V695M                                                                                                                                                                                                                                                                                                                                                                                                                                                                                                                                                                                                                                                                                                                                                                                                    | 1.121 | 2.23E-05 | 4.89E-05 Fam29_f_m_aF_uM         | 0/0;0/1;0/1;0/1     |
| chr18 | 57571470 | 57571470 | C | T | FECH   | exonic | nonsynonymous SNV | FECH:NM_000140:exon4:c.G385A;p.G129R,FECH:NM_00102515:exon4:c.G403A;p.G135R,FECH:NM_001371094:exon4:c.G385A;p.G129R,FECH:NM_001371095:exon5:c.G169A;p.G57R                                                                                                                                                                                                                                                                                                                                                                                                                                                                                                                                                                                                                                                                                                                       | 1.34  | 0.0003   | 0.0003 9.79E-05 Fam92_f_m_aM_raM | 0/0;0/1;0/1;0/0     |
| chr18 | 57607247 | 57607247 | C | A | NARS   | exonic | nonsynonymous SNV | NARS:NM_004539:exon9:c.G888T;p.L296F                                                                                                                                                                                                                                                                                                                                                                                                                                                                                                                                                                                                                                                                                                                                                                                                                                             | 1.012 |          | Fam117_f_m_aM_aF                 | 0/1;0/0;0/1;0/1     |

|       |          |          |   |   |          |        |                   |                                                                                                                                                                                                                                                                                                                                                                                                                                                                   |       |          |          |                      |                     |                     |
|-------|----------|----------|---|---|----------|--------|-------------------|-------------------------------------------------------------------------------------------------------------------------------------------------------------------------------------------------------------------------------------------------------------------------------------------------------------------------------------------------------------------------------------------------------------------------------------------------------------------|-------|----------|----------|----------------------|---------------------|---------------------|
| chr18 | 58351045 | 58351045 | A | T | NEDD4L   | exonic | nonsynonymous SNV | NEDD4L:NM_001144970:exon16:c.A1285T;p.N429Y,NEDD4L:NM_001243960:exon16:c.A1516T;p.N506Y,NEDD4L:NM_001144966:exon17:c.A1345T;p.N449Y,NEDD4L:NM_001144969:exon17:c.A1624T;p.N542Y,NEDD4L:NM_0152777:exon17:c.A1648T;p.N550Y,NEDD4L:NM_001144964:exon18:c.A1345T;p.N449Y,NEDD4L:NM_001144965:exon18:c.A1345T;p.N449Y,NEDD4L:NM_001144967:exon18:c.A1708T;p.N570Y,NEDD4L:NM_001144968:exon18:c.A1684T;p.N562Y,NEDD4L:NM_001144971:exon18:c.A1285T;p.N429Y             | 2.373 |          |          | Fam91_m_aM_dM_aM_dM  | 0/1;0/1;0/1;0/0;0/0 |                     |
| chr18 | 58389182 | 58389182 | G | C | NEDD4L   | exonic | nonsynonymous SNV | NEDD4L:NM_001144970:exon26:c.G2222C;p.W741S,NEDD4L:NM_001243960:exon26:c.G2453C;p.W818S,NEDD4L:NM_001144966:exon27:c.G2282C;p.W761S,NEDD4L:NM_001144969:exon27:c.G2561C;p.W854S,NEDD4L:NM_0152777:exon27:c.G2585C;p.W862S,NEDD4L:NM_001144964:exon28:c.G2282C;p.W761S,NEDD4L:NM_001144965:exon28:c.G2282C;p.W761S,NEDD4L:NM_001144967:exon28:c.G2645C;p.W882S,NEDD4L:NM_001144968:exon28:c.G2621C;p.W874S,NEDD4L:NM_001144971:exon28:c.G2222C;p.W741S             | 2.726 | 0.0003   | 4.88E-05 | Fam97_f_m_aM_aF      | 0/1;0/0;0/1;0/0     |                     |
| chr18 | 58671749 | 58671749 | C | T | MALT1    | exonic | nonsynonymous SNV | MALT1:NM_006785:exon1:c.C106T;p.P36S,MALT1:NM_173844:exon1:c.C106T;p.P36S                                                                                                                                                                                                                                                                                                                                                                                         | 1.058 |          |          | Fam106_f_m_aM        | 0/0;0/1;0/1         |                     |
| chr18 | 59272434 | 59272434 | T | C | RAX      | exonic | nonsynonymous SNV | RAX:NM_013435:exon2:c.A470C;p.K157T                                                                                                                                                                                                                                                                                                                                                                                                                               | 1.938 |          | 7.82E-05 | Fam50_f_m_aF         | 0/0;0/1;0/1         |                     |
| chr18 | 61554613 | 61554613 | A | C | CDH20    | exonic | nonsynonymous SNV | CDH20:NM_031891:exon12:c.A2324C;p.D775A                                                                                                                                                                                                                                                                                                                                                                                                                           | 1.177 |          | 1.21E-05 | Fam89_f_m_aM         | 0/0;0/1;0/1         |                     |
| chr18 | 62716171 | 62716171 | C | T | PHLPP1   | exonic | nonsynonymous SNV | PHLPP1:NM_194449:exon1:c.C488T;p.A163V                                                                                                                                                                                                                                                                                                                                                                                                                            | 1.559 |          | 4.88E-05 | Fam1_f_m_aM          | 0/1;0/0;0/1         |                     |
| chr18 | 62716314 | 62716314 | A | G | PHLPP1   | exonic | nonsynonymous SNV | PHLPP1:NM_194449:exon1:c.A631G;p.M211V                                                                                                                                                                                                                                                                                                                                                                                                                            | 1.587 | 7.41E-05 | 4.82E-05 | Fam56_f_m_aF_aM      | 0/0;0/1;0/1;0/1     |                     |
| chr18 | 76442990 | 76442990 | C | T | ZNF516   | exonic | nonsynonymous SNV | ZNF516:NM_014643:exon3:c.G65A;p.R22Q                                                                                                                                                                                                                                                                                                                                                                                                                              | 1.646 |          | 1.16E-05 | Fam59_f_m_aF_uM      | 0/0;0/1;0/1;0/0     |                     |
| chr18 | 76851911 | 76851911 | C | A | ZNF236   | exonic | nonsynonymous SNV | ZNF236:NM_001306089:exon3:c.C335A;p.A112E,ZNF236:NM_007345:exon3:c.C329A;p.A110E                                                                                                                                                                                                                                                                                                                                                                                  | 1.711 |          |          | Fam15_f_m_aM_aM      | 0/1;0/0;0/1;0/1     |                     |
| chr18 | 76925348 | 76925348 | T | C | ZNF236   | exonic | nonsynonymous SNV | ZNF236:NM_001306089:exon22:c.T3821C;p.F1274S,ZNF236:NM_007345:exon22:c.T3815C;p.F1272S                                                                                                                                                                                                                                                                                                                                                                            | 1.301 |          |          | Fam102_f_m_aM        | 0/0;0/1;0/1         |                     |
| chr18 | 77268610 | 77268610 | T | C | GALR1    | exonic | nonsynonymous SNV | GALR1:NM_001480:exon3:c.T758C;p.V253A                                                                                                                                                                                                                                                                                                                                                                                                                             | 1.33  |          | 4.48E-05 | Fam115_f_m_aF_aM_aF  | 0/1;0/0;0/1;0/0;0/1 |                     |
| chr18 | 78994128 | 78994128 | G | A | SALL3    | exonic | nonsynonymous SNV | SALL3:NM_171999:exon2:c.G2137A;p.G713S                                                                                                                                                                                                                                                                                                                                                                                                                            | 1.216 |          | 3.29E-05 | Fam87_f_m_aM_uM      | 0/1;0/0;0/1;0/1     |                     |
| chr18 | 78994519 | 78994519 | T | C | SALL3    | exonic | nonsynonymous SNV | SALL3:NM_171999:exon2:c.T2528C;p.L843P                                                                                                                                                                                                                                                                                                                                                                                                                            | 1.569 |          | 9.81E-05 | Fam22_f_m_aF_aF_uF   | 0/1;0/0;0/1;0/1;0/1 |                     |
| chr18 | 78994638 | 78994638 | G | A | SALL3    | exonic | nonsynonymous SNV | SALL3:NM_171999:exon2:c.G2647A;p.V883M,NFATC1:NM_001278673:exon4:c.G280A;p.V94I,NFATC1:NM_172388:exon4:c.G280A;p.V94I,NFATC1:NM_001278669:exon5:c.G1696A;p.V566I,NFATC1:NM_001278670:exon5:c.G1696A;p.V566I,NFATC1:NM_001278672:exon5:c.G1657A;p.V553I,NFATC1:NM_001278675:exon5:c.G1657A;p.V553I,NFATC1:NM_006162:exon5:c.G1696A;p.V566I,NFATC1:NM_172387:exon5:c.G1657A;p.V553I,NFATC1:NM_172389:exon5:c.G1657A;p.V553I,NFATC1:NM_172390:exon5:c.G1696A;p.V566I | 1.052 | 7.35E-05 | 6.63E-05 | Fam71_f_m_aF         | 0/1;0/0;0/1         |                     |
| chr18 | 79451060 | 79451060 | G | A | NFATC1   | exonic | nonsynonymous SNV | NFATC1:NM_001278673:exon4:c.G280A;p.V94I,NFATC1:NM_172388:exon4:c.G280A;p.V94I,NFATC1:NM_001278669:exon5:c.G1696A;p.V566I,NFATC1:NM_001278670:exon5:c.G1696A;p.V566I,NFATC1:NM_001278672:exon5:c.G1657A;p.V553I,NFATC1:NM_001278675:exon5:c.G1657A;p.V553I,NFATC1:NM_006162:exon5:c.G1696A;p.V566I,NFATC1:NM_172387:exon5:c.G1657A;p.V553I,NFATC1:NM_172389:exon5:c.G1657A;p.V553I,NFATC1:NM_172390:exon5:c.G1696A;p.V566I                                        | 1.443 | 0.0009   | 0.0004   | Fam91_m_aM_dM_aM_dM  | 0/1;0/1;0/1;0/0;0/0 |                     |
| chr18 | 80159782 | 80159782 | C | A | PAR6G    | exonic | nonsynonymous SNV | PAR6G:NM_032510:exon3:c.G1120T;p.V374F                                                                                                                                                                                                                                                                                                                                                                                                                            | 1.613 |          | 0.0005   | Fam71_f_m_aF         | 0/1;0/0;0/1         |                     |
| chr18 | 80159857 | 80159857 | G | C | PAR6G    | exonic | nonsynonymous SNV | PAR6G:NM_032510:exon3:c.C1045G;p.L349V                                                                                                                                                                                                                                                                                                                                                                                                                            | 1.887 |          |          | Fam42_f_m_aM_uF      | 0/0;0/1;0/1;0/1     |                     |
| chr18 | 80160089 | 80160089 | G | C | PAR6G    | exonic | nonsynonymous SNV | PAR6G:NM_032510:exon3:c.C813G;p.D271E                                                                                                                                                                                                                                                                                                                                                                                                                             | 1.11  | 0.0006   | 0.0005   | 0.0003               | Fam70_f_m_aM        | 0/1;0/0;0/1         |
| chr19 | 917735   | 917735   | A | G | KISS1R   | exonic | nonsynonymous SNV | KISS1R:NM_032551:exon1:c.A233G;p.N78S,ARHGAP45:NM_001282334:exon8:c.G1253T;p.C418F,ARHGAP45:NM_001282335:exon17:c.G1997T;p.C666F,ARHGAP45:NM_001282338:exon18:c.G2396T;p.C799F,ARHGAP45:NM_001321232:exon18:c.G2360T;p.C787F,ARHGAP45:NM_012292:exon18:c.G2348T;p.C783F,SBNO2:NM_001100122:exon26:c.A3110G;p.Y1037C,SBNO2:NM_014963:exon29:c.A3281G;p.Y1094C,APC2:NM_001351273:exon1:c.C79G;p.Q27E,APC2:NM_005883:exon2:c.C79G;p.Q27E                             | 1.319 |          | 3.37E-05 | Fam9_f_m_aM_dM_uF    | 0/1;0/0;0/1;0/0;0/0 |                     |
| chr19 | 1081707  | 1081707  | G | T | ARHGAP45 | exonic | nonsynonymous SNV | ARHGAP45:NM_001282334:exon8:c.G1253T;p.C418F,ARHGAP45:NM_001282335:exon17:c.G1997T;p.C666F,ARHGAP45:NM_001282338:exon18:c.G2396T;p.C799F,ARHGAP45:NM_001321232:exon18:c.G2360T;p.C787F,ARHGAP45:NM_012292:exon18:c.G2348T;p.C783F,SBNO2:NM_001100122:exon26:c.A3110G;p.Y1037C,SBNO2:NM_014963:exon29:c.A3281G;p.Y1094C,APC2:NM_001351273:exon1:c.C79G;p.Q27E,APC2:NM_005883:exon2:c.C79G;p.Q27E                                                                   | 1.073 |          |          | Fam55_f_m_aM_aM_dM   | 0/1;0/0;0/0;0/1;0/0 |                     |
| chr19 | 1109359  | 1109359  | T | C | SBNO2    | exonic | nonsynonymous SNV | SBNO2:NM_001100122:exon26:c.A3110G;p.Y1037C,SBNO2:NM_014963:exon29:c.A3281G;p.Y1094C,APC2:NM_001351273:exon1:c.C79G;p.Q27E,APC2:NM_005883:exon2:c.C79G;p.Q27E                                                                                                                                                                                                                                                                                                     | 1.302 |          |          | Fam82_f_m_aM_uF      | 0/0;0/1;0/1;0/0     |                     |
| chr19 | 1453080  | 1453080  | C | G | APC2     | exonic | nonsynonymous SNV | APC2:NM_001351273:exon11:c.G1483A;p.A495T,APC2:NM_005883:exon12:c.G1486A;p.A496T                                                                                                                                                                                                                                                                                                                                                                                  | 1.429 |          | 1.14E-05 | Fam26_f_m_aM_uM      | 0/0;0/1;0/1;0/0     |                     |
| chr19 | 1465155  | 1465155  | G | T | APC2     | exonic | nonsynonymous SNV | APC2:NM_001351273:exon14:c.G1851T;p.R617S,APC2:NM_005883:exon15:c.G1854T;p.R618S                                                                                                                                                                                                                                                                                                                                                                                  | 1.609 |          |          | Fam94_f_m_aM         | 0/0;0/1;0/1         |                     |
| chr19 | 1466605  | 1466605  | G | A | APC2     | exonic | nonsynonymous SNV | APC2:NM_001351273:exon14:c.G3301A;p.E1101K,APC2:NM_005883:exon15:c.G3304A;p.E1102K                                                                                                                                                                                                                                                                                                                                                                                | 1.306 |          | 1.79E-05 | Fam110_f_m_aM_aM_uMs | 0/1;0/0;0/0;0/1;0/1 |                     |
| chr19 | 1469768  | 1469768  | A | G | APC2     | exonic | nonsynonymous SNV | APC2:NM_001351273:exon14:c.A6464G;p.H2155R,APC2:NM_005883:exon15:c.A6467G;p.H2156R                                                                                                                                                                                                                                                                                                                                                                                | 1.664 |          |          | Fam110_f_m_aM_aM_uMs | 0/1;0/0;0/1;0/0;0/0 |                     |
| chr19 | 2252568  | 2252568  | C | T | JSRP1    | exonic | nonsynonymous SNV | JSRP1:NM_144616:exon7:c.G757A;p.E253K                                                                                                                                                                                                                                                                                                                                                                                                                             | 1.17  |          |          | Fam44_f_m_aM_uF      | 0/1;0/0;0/1;0/0     |                     |
| chr19 | 2321772  | 2321772  | C | T | LSM7     | exonic | nonsynonymous SNV | LSM7:NM_016199:exon4:c.G220A;p.V74M                                                                                                                                                                                                                                                                                                                                                                                                                               | 1.879 |          | 0.0001   | Fam116_f_m_aM_aF     | 0/0;0/1;0/1;0/1     |                     |
| chr19 | 3110232  | 3110232  | G | T | GNA11    | exonic | nonsynonymous SNV | GNA11:NM_002067:exon2:c.G220T;p.G74C                                                                                                                                                                                                                                                                                                                                                                                                                              | 1.518 |          |          | Fam12_f_m_aM_uM_aM   | 0/0;0/1;0/0;0/1;0/1 |                     |
| chr19 | 3207443  | 3207443  | C | T | NCLN     | exonic | nonsynonymous SNV | NCLN:NM_001321463:exon14:c.C1603T;p.L535F,NCLN:NM_020170:exon14:c.C1606T;p.L536F                                                                                                                                                                                                                                                                                                                                                                                  | 1.477 |          |          | Fam97_f_m_aM_aF      | 0/1;0/0;0/0;0/1     |                     |
| chr19 | 3531961  | 3531961  | A | G | FZR1     | exonic | nonsynonymous SNV | FZR1:NM_001136197:exon7:c.A607G;p.M203V,FZR1:NM_001136198:exon9:c.A874G;p.M292V,FZR1:NM_016263:exon10:c.A874G;p.M292V,FZR1:NM_001136197:exon8:c.G775A;p.V259M,FZR1:NM_001136198:exon10:c.G1042A;p.V348M,FZR1:NM_016263:exon11:c.G1042A;p.V348M                                                                                                                                                                                                                    | 1.32  | 0.0003   | 0.0007   | 0.0003               | Fam27_f_m_aF_uM_uM  | 0/0;0/1;0/1;0/1;0/0 |
| chr19 | 3532450  | 3532450  | G | A | FZR1     | exonic | nonsynonymous SNV | FZR1:NM_001136197:exon8:c.G775A;p.V259M,FZR1:NM_001136198:exon10:c.G1042A;p.V348M,FZR1:NM_016263:exon11:c.G1042A;p.V348M                                                                                                                                                                                                                                                                                                                                          | 1.377 |          | 7.63E-05 | 1.40E-05             | Fam24_f_m_aM_aM     | 0/1;0/0;0/1;0/1     |



|       |          |          |   |   |          |        |                   |                                                                                                                                                                                                                                                                                                    |       |          |          |          |                      |                     |             |
|-------|----------|----------|---|---|----------|--------|-------------------|----------------------------------------------------------------------------------------------------------------------------------------------------------------------------------------------------------------------------------------------------------------------------------------------------|-------|----------|----------|----------|----------------------|---------------------|-------------|
| chr19 | 3612324  | 3612324  | G | T | CACTIN   | exonic | nonsynonymous SNV | CACTIN:NM_001080543:exon10:c.C1876A:p.P626T,CACTIN:NM_021231:exon10:c.C1876A:p.P626T                                                                                                                                                                                                               | 2.676 | .        | .        | .        | .                    | Fam71_f_m_aF        | 0/1;0/0;0/1 |
| chr19 | 3908279  | 3908279  | G | A | ATCAY    | exonic | nonsynonymous SNV | ATCAY:NM_033064:exon6:c.G556A:p.E186K                                                                                                                                                                                                                                                              | 1.358 | 7.37E-05 | 9.24E-05 | 4.89E-05 | Fam36_f_m_aM_uM      | 0/1;0/0;0/1;0/0     |             |
| chr19 | 4254468  | 4254468  | G | C | YJU2     | exonic | nonsynonymous SNV | YJU2:NM_018074:exon4:c.G384C:p.E128D                                                                                                                                                                                                                                                               | 1.169 | 0.0005   | 0.001    | 0.0006   | Fam13_f_m_aM         | 0/0;0/1;0/1         |             |
| chr19 | 4254468  | 4254468  | G | C | YJU2     | exonic | nonsynonymous SNV | YJU2:NM_018074:exon4:c.G384C:p.E128D                                                                                                                                                                                                                                                               | 1.169 | 0.0005   | 0.001    | 0.0006   | Fam20_f_m_aM_uF      | 0/1;0/0;0/1;0/0     |             |
| chr19 | 4343779  | 4343779  | G | C | MPND     | exonic | nonsynonymous SNV | MPND:NM_001159846:exon2:c.G79C:p.A27P,MPND:NM_001300862:exon2:c.G79C:p.A27P,MPND:NM_032868:exon2:c.G79C:p.A27P                                                                                                                                                                                     | 2.287 | .        | .        | .        | Fam120_f_m_aM_aM     | 0/0;0/1;0/1;0/1     |             |
| chr19 | 4354347  | 4354347  | T | G | MPND     | exonic | nonsynonymous SNV | MPND:NM_001159846:exon6:c.T773G:p.V258G,MPND:NM_001300862:exon6:c.T773G:p.V258G,MPND:NM_032868:exon6:c.T773G:p.V258G                                                                                                                                                                               | 1.153 | .        | .        | .        | Fam72_f_m_aF_uF      | 0/1;0/0;0/1;0/0     |             |
| chr19 | 4363794  | 4363794  | G | A | SH3GL1   | exonic | nonsynonymous SNV | SH3GL1:NM_001199943:exon5:c.C406T:p.R136C,SH3GL1:NM_001199944:exon6:c.C358T:p.R120C,SH3GL1:NM_003025:exon6:c.C550T:p.R184C                                                                                                                                                                         | 1.323 | .        | 7.46E-05 | .        | Fam82_f_m_aM_uF      | 0/0;0/1;0/1;0/0     |             |
| chr19 | 4366976  | 4366976  | C | T | SH3GL1   | exonic | nonsynonymous SNV | SH3GL1:NM_001199943:exon2:c.G64A:p.G22R,SH3GL1:NM_001199944:exon2:c.G64A:p.G22R,SH3GL1:NM_003025:exon2:c.G64A:p.G22R                                                                                                                                                                               | 1.319 | .        | 3.27E-05 | 6.98E-06 | Fam12_f_m_aM_uM_aM   | 0/1;0/0;0/1;0/1;0/1 |             |
| chr19 | 4429451  | 4429451  | G | A | CHAF1A   | exonic | nonsynonymous SNV | CHAF1A:NM_005483:exon9:c.G1618A:p.V540M                                                                                                                                                                                                                                                            | 1.738 | .        | .        | 1.40E-05 | Fam56_f_m_aF_aM      | 0/1;0/0;0/0;0/1     |             |
| chr19 | 4543879  | 4543879  | G | C | SEMA6B   | exonic | nonsynonymous SNV | SEMA6B:NM_032108:exon17:c.C2389G:p.R797G                                                                                                                                                                                                                                                           | 3.597 | .        | .        | .        | Fam100_f_m_aF        | 0/1;0/0;0/1         |             |
| chr19 | 4548309  | 4548309  | C | T | SEMA6B   | exonic | nonsynonymous SNV | SEMA6B:NM_032108:exon13:c.G1408A:p.G470R                                                                                                                                                                                                                                                           | 1.272 | .        | .        | .        | Fam118_f_m_aM_aF_uM  | 0/0;0/1;0/0;0/1;0/1 |             |
| chr19 | 5604851  | 5604851  | G | A | SAFB2    | exonic | nonsynonymous SNV | SAFB2:NM_014649:exon10:c.C1382T:p.A461V                                                                                                                                                                                                                                                            | 1.303 | .        | 9.83E-05 | 4.89E-05 | Fam24_f_m_aM_aM      | 0/0;0/1;0/0;0/1     |             |
| chr19 | 5827860  | 5827860  | C | A | NRTN     | exonic | nonsynonymous SNV | NRTN:NM_004558:exon2:c.C281A:p.A94E                                                                                                                                                                                                                                                                | 1.701 | 0.0002   | 0.0006   | 0.0002   | Fam24_f_m_aM_aM      | 0/0;0/1;0/1;0/0     |             |
| chr19 | 6004235  | 6004235  | A | G | RFX2     | exonic | nonsynonymous SNV | RFX2:NM_134433:exon12:c.T1391C:p.M464T,RFX2:NM_00635:exon13:c.T1466C:p.M489T                                                                                                                                                                                                                       | 1.395 | .        | .        | .        | Fam114_f_m_aM        | 0/1;0/0;0/1         |             |
| chr19 | 6418052  | 6418052  | G | T | KHSRP    | exonic | nonsynonymous SNV | KHSRP:NM_001366299:exon10:c.C907A:p.L303I,KHSRP:NM_001366300:exon10:c.C907A:p.L303I,KHSRP:NM_003685:exon10:c.C907A:p.L303I                                                                                                                                                                         | 2.337 | .        | .        | .        | Fam118_f_m_aM_aF_uM  | 0/0;0/1;0/1;0/0;0/0 |             |
| chr19 | 6531050  | 6531050  | C | G | TNFSF9   | exonic | nonsynonymous SNV | TNFSF9:NM_003811:exon1:c.C14G:p.S5C                                                                                                                                                                                                                                                                | 1.512 | .        | .        | .        | Fam7_f_m_aM_aM_uM    | 0/1;0/0;0/1;0/0;0/0 |             |
| chr19 | 6714442  | 6714442  | G | A | C3       | exonic | nonsynonymous SNV | C3:NM_000064:exon5:c.C509T:p.P170L                                                                                                                                                                                                                                                                 | 1.583 | .        | 1.12E-05 | .        | Fam69_f_m_aM         | 0/1;0/0;0/1         |             |
| chr19 | 6826628  | 6826628  | C | T | VAV1     | exonic | nonsynonymous SNV | VAV1:NM_001258207:exon8:c.C748T:p.R250C,VAV1:NM_01258206:exon9:c.C844T:p.R282C,VAV1:NM_005428:exon9:c.C844T:p.R282C                                                                                                                                                                                | 2.075 | 7.35E-05 | 9.35E-05 | 2.79E-05 | Fam52_f_m_aM         | 0/1;0/0;0/1         |             |
| chr19 | 6857093  | 6857093  | T | G | VAV1     | exonic | nonsynonymous SNV | VAV1:NM_001258206:exon26:c.T2458G:p.S820A,VAV1:NM_001258207:exon26:c.T2428G:p.S810A,VAV1:NM_005428:exon27:c.T2524G:p.S842A                                                                                                                                                                         | 1.805 | .        | .        | .        | Fam6_f_m_aM          | 0/1;0/0;0/1         |             |
| chr19 | 7125348  | 7125348  | G | C | INSR     | exonic | nonsynonymous SNV | INSR:NM_001079817:exon16:c.C3157G:p.L1053V,INSR:NM_000208:exon17:c.C3193G:p.L1065V                                                                                                                                                                                                                 | 1.184 | 0.0005   | 0.0005   | 0.0002   | Fam110_f_m_aM_aM_uMs | 0/1;0/0;0/1;0/1;0/0 |             |
| chr19 | 7126628  | 7126628  | G | A | INSR     | exonic | nonsynonymous SNV | INSR:NM_001079817:exon15:c.C2933T:p.P978I,INSR:NM_000208:exon16:c.C2969T:p.P990L                                                                                                                                                                                                                   | 1.734 | .        | 9.50E-05 | .        | Fam119_f_m_aM_aM     | 0/0;0/1;0/1;0/0     |             |
| chr19 | 7170587  | 7170587  | C | T | INSR     | exonic | nonsynonymous SNV | INSR:NM_000208:exon6:c.G1433A:p.R478H,INSR:NM_001079817:exon6:c.G1433A:p.R478H                                                                                                                                                                                                                     | 2.017 | 7.35E-05 | 0.0001   | 5.59E-05 | Fam37_f_m_aF_uM      | 0/1;0/0;0/1;0/1     |             |
| chr19 | 7615554  | 7615554  | G | A | CAMSAP3  | exonic | nonsynonymous SNV | CAMSAP3:NM_020902:exon13:c.G2947A:p.E983K,CAMSAP3:NM_001080429:exon15:c.G3028A:p.E1010K                                                                                                                                                                                                            | 1.733 | 7.35E-05 | 2.57E-05 | 6.98E-06 | Fam45_f_m_aM_uF      | 0/1;0/0;0/1;0/0     |             |
| chr19 | 7627817  | 7627817  | G | A | XAB2     | exonic | nonsynonymous SNV | XAB2:NM_020196:exon3:c.C235T:p.R79W                                                                                                                                                                                                                                                                | 1.339 | .        | 1.12E-05 | 2.09E-05 | Fam2_f_m_aF          | 0/1;0/0;0/1         |             |
| chr19 | 7729433  | 7729433  | A | T | CLEC4G   | exonic | nonsynonymous SNV | CLEC4G:NM_001244856:exon9:c.T779A:p.L260Q,CLEC4G:NM_198492:exon9:c.T815A:p.L272Q                                                                                                                                                                                                                   | 1.409 | .        | .        | .        | Fam117_f_m_aM_aF     | 0/0;0/1;0/0;0/1     |             |
| chr19 | 7767520  | 7767520  | T | C | CLEC4M   | exonic | nonsynonymous SNV | CLEC4M:NM_001144906:exon5:c.T533C:p.F178S,CLEC4M:NM_001144907:exon5:c.T740C:p.F247S,CLEC4M:NM_001144904:exon6:c.T788C:p.F263S,CLEC4M:NM_014257:exon6:c.T941C:p.F314S,CLEC4M:NM_001144905:exon7:c.T869C:p.F290S,CLEC4M:NM_001144909:exon7:c.T803C:p.F268S,CLEC4M:NM_001144910:exon7:c.T872C:p.F291S | 1.077 | .        | .        | .        | Fam48_f_m_aM_uM      | 0/0;0/1;0/1;0/1     |             |
| chr19 | 7850027  | 7850027  | G | A | EVI5L    | exonic | nonsynonymous SNV | EVI5L:NM_001159944:exon6:c.G658A:p.V220M,EVI5L:NM_145245:exon6:c.G658A:p.V220M                                                                                                                                                                                                                     | 2.026 | .        | 3.55E-05 | 6.99E-06 | Fam72_f_m_aF_uF      | 0/0;0/1;0/1;0/0     |             |
| chr19 | 7967610  | 7967610  | G | A | ELAVL1   | exonic | nonsynonymous SNV | ELAVL1:NM_001419:exon5:c.C611T:p.A204V                                                                                                                                                                                                                                                             | 1.488 | .        | 4.48E-05 | 6.98E-06 | Fam76_f_m_aM_uM      | 0/0;0/1;0/1;0/0     |             |
| chr19 | 8399920  | 8399920  | G | A | RAB11B   | exonic | nonsynonymous SNV | RAB11B:NM_004218:exon2:c.G98A:p.R33H                                                                                                                                                                                                                                                               | 2.605 | .        | .        | .        | Fam52_f_m_aM         | 0/0;0/0;0/1         |             |
| chr19 | 8605263  | 8605263  | G | A | ADAMTS10 | exonic | nonsynonymous SNV | ADAMTS10:NM_030957:exon4:c.C184T:p.R62W                                                                                                                                                                                                                                                            | 1.553 | .        | 3.30E-05 | 6.98E-06 | Fam116_f_m_aM_aF     | 0/0;0/1;0/0;0/1     |             |
| chr19 | 10223921 | 10223921 | G | A | S1PR2    | exonic | nonsynonymous SNV | S1PR2:NM_004230:exon2:c.C985T:p.R329C                                                                                                                                                                                                                                                              | 1.675 | .        | 6.88E-05 | 2.09E-05 | Fam2_f_m_aF          | 0/1;0/0;0/1         |             |
| chr19 | 10256820 | 10256820 | G | A | MRPL4    | exonic | nonsynonymous SNV | MRPL4:NM_015956:exon5:c.G440A:p.R147Q,MRPL4:NM_146388:exon5:c.G440A:p.R147Q,MRPL4:NM_146387:exon6:c.G440A:p.R147Q                                                                                                                                                                                  | 1.194 | 0.0007   | 0.0001   | 7.07E-06 | Fam27_f_m_aF_uM_uM   | 0/0;0/1;0/1;0/1;0/0 |             |
| chr19 | 10335275 | 10335275 | A | G | ICAM3    | exonic | nonsynonymous SNV | ICAM3:NM_001320606:exon4:c.T497C:p.L166P,ICAM3:NM_002162:exon4:c.T728C:p.L243P                                                                                                                                                                                                                     | 1.588 | .        | 0.0001   | 1.40E-05 | Fam30_f_m_aM_uM      | 0/0;0/1;0/1;0/1     |             |
| chr19 | 10489302 | 10489302 | C | T | KEAP1    | exonic | nonsynonymous SNV | KEAP1:NM_012289:exon5:c.G1598A:p.S533N,KEAP1:NM_03500:exon5:c.G1598A:p.S533N                                                                                                                                                                                                                       | 1.742 | .        | .        | .        | Fam53_f_m_aM         | 0/1;0/0;0/1         |             |
| chr19 | 10499441 | 10499441 | T | G | KEAP1    | exonic | nonsynonymous SNV | KEAP1:NM_012289:exon2:c.A593C:p.E198A,KEAP1:NM_03500:exon2:c.A593C:p.E198A                                                                                                                                                                                                                         | 2.191 | .        | 3.29E-05 | .        | Fam40_f_m_aM_aM      | 0/1;0/0;0/1;0/1     |             |
| chr19 | 10544813 | 10544813 | G | A | ATG4D    | exonic | nonsynonymous SNV | ATG4D:NM_001281504:exon2:c.G77A:p.S26N,ATG4D:NM_032885:exon2:c.G266A:p.S89N                                                                                                                                                                                                                        | 1     | 0.0008   | 0.001    | 0.0007   | Fam120_f_m_aM_aM     | 0/0;0/1;0/0;0/1     |             |
| chr19 | 10871716 | 10871716 | C | G | CARM1    | exonic | nonsynonymous SNV | CARM1:NM_001370088:exon1:c.C14G:p.A5G,CARM1:NM_199141:exon1:c.C14G:p.A5G                                                                                                                                                                                                                           | 1.278 | .        | .        | .        | Fam49_f_m_aM         | 0/1;0/0;0/1         |             |

|       |          |          |   |   |            |        |                   |                                                                                                                                                                                                                                                                                                                                                                                                                                                                                                                                                                                                                                                        |       |          |          |          |                     |                     |
|-------|----------|----------|---|---|------------|--------|-------------------|--------------------------------------------------------------------------------------------------------------------------------------------------------------------------------------------------------------------------------------------------------------------------------------------------------------------------------------------------------------------------------------------------------------------------------------------------------------------------------------------------------------------------------------------------------------------------------------------------------------------------------------------------------|-------|----------|----------|----------|---------------------|---------------------|
| chr19 | 11007921 | 11007921 | C | T | SMARCA4    | exonic | nonsynonymous SNV | SMARCA4:NM_001128845:exon13:c.C2021T:p.P674L,SMARCA4:NM_001128846:exon13:c.C2021T:p.P674L,SMARCA4:NM_001128848:exon13:c.C2021T:p.P674L,SMARCA4:NM_001128847:exon14:c.C2021T:p.P674L,SMARCA4:NM_001128849:exon14:c.C2021T:p.P674L,SMARCA4:NM_003072:exon14:c.C2021T:p.P674L,SMARCA4:NM_001128844:exon15:c.C2021T:p.P674L,SMARCA4:NM_001128845:exon32:c.G4744A:p.G1582S,SMARCA4:NM_001128846:exon32:c.G4741A:p.G1581S,SMARCA4:NM_001128848:exon32:c.G4732A:p.G1578S,SMARCA4:NM_001128847:exon33:c.G4735A:p.G1579S,SMARCA4:NM_003072:exon34:c.G4834A:p.G1612S,SMARCA4:NM_001128844:exon35:c.G4834A:p.G1612S,SMARCA4:NM_001128849:exon35:c.G4930A:p.G1644S | 1.275 | 7.36E-05 | 8.94E-05 | 6.99E-06 | Fam45_f_m_aM_uF     | 0/0;0/1;0/1;0/0     |
| chr19 | 11060110 | 11060110 | G | A | SMARCA4    | exonic | nonsynonymous SNV | SMARCA4:NM_001128845:exon32:c.G4744A:p.G1582S,SMARCA4:NM_001128846:exon32:c.G4741A:p.G1581S,SMARCA4:NM_001128848:exon32:c.G4732A:p.G1578S,SMARCA4:NM_001128847:exon33:c.G4735A:p.G1579S,SMARCA4:NM_003072:exon34:c.G4834A:p.G1612S,SMARCA4:NM_001128844:exon35:c.G4834A:p.G1612S,SMARCA4:NM_001128849:exon35:c.G4930A:p.G1644S                                                                                                                                                                                                                                                                                                                         | 1.811 | 7.35E-05 | 0.0001   | 1.40E-05 | Fam21_f_m_aM_uM     | 0/0;0/1;0/1;0/1     |
| chr19 | 11380920 | 11380920 | A | C | EPOR       | exonic | nonsynonymous SNV | EPOR:NM_000121:exon6:c.T791G:p.V264G                                                                                                                                                                                                                                                                                                                                                                                                                                                                                                                                                                                                                   | 1.105 | 0.0001   | 0.001    | 0.0001   | Fam122_f_m_aM       | 0/1;0/0;0/1         |
| chr19 | 11383229 | 11383229 | G | A | EPOR       | exonic | nonsynonymous SNV | EPOR:NM_000121:exon2:c.C119T:p.A40V                                                                                                                                                                                                                                                                                                                                                                                                                                                                                                                                                                                                                    | 1.15  |          | 2.33E-05 | 2.09E-05 | Fam42_f_m_aM_uF     | 0/0;0/1;0/1;0/0     |
| chr19 | 11466710 | 11466710 | C | T | ELAVL3     | exonic | nonsynonymous SNV | ELAVL3:NM_001420:exon2:c.G127A:p.V43I,ELAVL3:NM_032281:exon2:c.G127A:p.V43I                                                                                                                                                                                                                                                                                                                                                                                                                                                                                                                                                                            | 1.057 |          | 1.12E-05 |          | Fam107_f_m_aM       | 0/1;0/0;0/1         |
| chr19 | 11505503 | 11505503 | C | G | ZNF653     | exonic | nonsynonymous SNV | ZNF653:NM_138783:exon1:c.G284C:p.R95P                                                                                                                                                                                                                                                                                                                                                                                                                                                                                                                                                                                                                  | 1.327 |          |          |          | Fam116_f_m_aM_aF    | 0/0;0/1;0/1;0/0     |
| chr19 | 11576580 | 11576580 | G | C | ACPS5      | exonic | nonsynonymous SNV | ACPS5:NM_001611:exon4:c.C398G:p.P133R,ACPS5:NM_00111034:exon5:c.C398G:p.P133R,ACPS5:NM_00111036:exon5:c.C398G:p.P133R,ACPS5:NM_001322023:exon5:c.C398G:p.P133R,ACPS5:NM_00111035:exon6:c.C398G:p.P133R                                                                                                                                                                                                                                                                                                                                                                                                                                                 | 1.048 |          |          |          | Fam32_f_m_aM_uM     | 0/0;0/1;0/1;0/0     |
| chr19 | 12691450 | 12691450 | C | A | FBXW9      | exonic | nonsynonymous SNV | FBXW9:NM_032301:exon4:c.G683T:p.W228L                                                                                                                                                                                                                                                                                                                                                                                                                                                                                                                                                                                                                  | 1.456 |          |          |          | Fam95_f_m_aM_aM_uF  | 0/0;0/1;0/1;0/1;0/1 |
| chr19 | 12694706 | 12694706 | A | G | FBXW9      | exonic | nonsynonymous SNV | FBXW9:NM_032301:exon3:c.T566C:p.L189P                                                                                                                                                                                                                                                                                                                                                                                                                                                                                                                                                                                                                  | 1.706 |          | 3.28E-05 | 1.40E-05 | Fam30_f_m_aM_uM     | 0/0;0/1;0/1;0/1     |
| chr19 | 12696529 | 12696529 | G | C | FBXW9      | exonic | nonsynonymous SNV | FBXW9:NM_032301:exon1:c.C53G:p.S18W                                                                                                                                                                                                                                                                                                                                                                                                                                                                                                                                                                                                                    | 1.605 | 7.36E-05 | 3.48E-05 |          | Fam114_f_m_aM       | 0/1;0/0;0/1         |
| chr19 | 12706612 | 12706612 | C | T | TNPO2      | exonic | nonsynonymous SNV | TNPO2:NM_001136196:exon13:c.G1454A:p.R485H,TNPO2:NM_013433:exon13:c.G1454A:p.R485H,TNPO2:NM_001136195:exon14:c.G1454A:p.R485H                                                                                                                                                                                                                                                                                                                                                                                                                                                                                                                          | 2.487 |          |          |          | Fam94_f_m_aM        | 0/1;0/0;0/1         |
| chr19 | 12737528 | 12737528 | G | C | GET3       | exonic | nonsynonymous SNV | GET3:NM_004317:exon1:c.G23C:p.W8S                                                                                                                                                                                                                                                                                                                                                                                                                                                                                                                                                                                                                      | 1.092 | 0.0003   | 0.0004   | 0.0001   | Fam99_f_m_aM_aM     | 0/0;0/1;0/0;0/1     |
| chr19 | 12755439 | 12755439 | C | A | BEST2      | exonic | nonsynonymous SNV | BEST2:NM_017682:exon6:c.C697A:p.P233T                                                                                                                                                                                                                                                                                                                                                                                                                                                                                                                                                                                                                  | 1.515 |          |          |          | Fam117_f_m_aM_aF    | 0/0;0/1;0/0;0/1     |
| chr19 | 12924185 | 12924185 | C | T | FARSA      | exonic | nonsynonymous SNV | FARSA:NM_004461:exon12:c.G1354A:p.V452M                                                                                                                                                                                                                                                                                                                                                                                                                                                                                                                                                                                                                | 1.121 | 7.34E-05 | 7.46E-05 | 2.09E-05 | Fam42_f_m_aM_uF     | 0/1;0/0;0/1;0/1     |
| chr19 | 12928349 | 12928349 | G | C | FARSA      | exonic | nonsynonymous SNV | FARSA:NM_004461:exon7:c.C834G:p.F278L                                                                                                                                                                                                                                                                                                                                                                                                                                                                                                                                                                                                                  | 1.308 |          | 1.12E-05 | 6.98E-06 | Fam122_f_m_aM       | 0/1;0/0;0/1         |
| chr19 | 12948742 | 12948742 | C | T | RAD23A     | exonic | stopgain          | RAD23A:NM_001270362:exon5:c.C529T:p.R177X,RAD23A:NM_001270363:exon5:c.C529T:p.R177X,RAD23A:NM_005053:exon5:c.C529T:p.R177X,RAD23A:NM_001270362:exon5:c.C535T:p.R179W,RAD23A:NM_001270363:exon5:c.C535T:p.R179W,RAD23A:NM_005053:exon5:c.C535T:p.R179W                                                                                                                                                                                                                                                                                                                                                                                                  | 0.548 |          | 1.12E-05 |          | Fam101_f_m_aM       | 0/0;0/1;0/1         |
| chr19 | 12948748 | 12948748 | C | T | RAD23A     | exonic | nonsynonymous SNV | RAD23A:NM_001270363:exon5:c.C535T:p.R179W,RAD23A:NM_005053:exon5:c.C535T:p.R179W                                                                                                                                                                                                                                                                                                                                                                                                                                                                                                                                                                       | 1.154 |          | 7.46E-05 | 6.98E-06 | Fam17_f_m_aM_uM     | 0/0;0/1;0/1;0/0     |
| chr19 | 12954305 | 12954305 | T | G | GADD45GIP1 | exonic | nonsynonymous SNV | GADD45GIP1:NM_052850:exon2:c.A572C:p.K191T                                                                                                                                                                                                                                                                                                                                                                                                                                                                                                                                                                                                             | 1.549 |          | 3.27E-05 |          | Fam49_f_m_aM        | 0/1;0/0;0/1         |
| chr19 | 13025217 | 13025217 | T | C | NFIX       | exonic | nonsynonymous SNV | NFIX:NM_001365984:exon1:c.T221C:p.L74P,NFIX:NM_001365985:exon1:c.T221C:p.L74P,NFIX:NM_001271043:exon2:c.T248C:p.L83P,NFIX:NM_001271044:exon2:c.T200C:p.L67P,NFIX:NM_001365902:exon2:c.T224C:p.L75P,NFIX:NM_001365982:exon2:c.T224C:p.L75P,NFIX:NM_001365983:exon2:c.T83C:p.L28P,NFIX:NM_002501:exon2:c.T224C:p.L75P                                                                                                                                                                                                                                                                                                                                    | 3.285 |          |          |          | Fam81_f_m_aM_uM     | 0/0;0/0;0/1;0/0     |
| chr19 | 13983216 | 13983216 | G | A | RFX1       | exonic | stopgain          | RFX1:NM_002918:exon4:c.C484T:p.Q162X                                                                                                                                                                                                                                                                                                                                                                                                                                                                                                                                                                                                                   | 0.588 |          | 8.70E-05 |          | Fam14_f_m_aM_aM     | 0/0;0/1;0/0;0/1     |
| chr19 | 14156704 | 14156704 | T | C | ADGRL1     | exonic | nonsynonymous SNV | ADGRL1:NM_014921:exon16:c.A2987G:p.N996S,ADGRL1:NM_001008701:exon17:c.A3002G:p.N1001S                                                                                                                                                                                                                                                                                                                                                                                                                                                                                                                                                                  | 1.656 |          | 7.55E-05 |          | Fam91_m_aM_dM_aM_dM | 0/0;0/0;0/0;0/1;0/1 |
| chr19 | 14162968 | 14162968 | G | C | ADGRL1     | exonic | nonsynonymous SNV | ADGRL1:NM_014921:exon5:c.C833G:p.T278S,ADGRL1:NM_001008701:exon6:c.C848G:p.T283S                                                                                                                                                                                                                                                                                                                                                                                                                                                                                                                                                                       | 1.746 | 0.0004   | 0.0002   | 0.0003   | Fam63_f_m_aF        | 0/0;0/1;0/1         |
| chr19 | 14163220 | 14163220 | G | A | ADGRL1     | exonic | nonsynonymous SNV | ADGRL1:NM_014921:exon5:c.C581T:p.A194V,ADGRL1:NM_001008701:exon6:c.C596T:p.A199V                                                                                                                                                                                                                                                                                                                                                                                                                                                                                                                                                                       | 1.468 |          |          |          | Fam34_f_m_aM_uF     | 0/0;0/1;0/1;0/1     |
| chr19 | 14397745 | 14397745 | G | A | ADGRE5     | exonic | nonsynonymous SNV | ADGRE5:NM_001784:exon5:c.G434A:p.R145H,ADGRE5:NM_001025160:exon6:c.G566A:p.R189H,ADGRE5:NM_078481:exon7:c.G713A:p.R238H                                                                                                                                                                                                                                                                                                                                                                                                                                                                                                                                | 2.232 | 9.92E-05 | 0.0005   | 0.0001   | Fam119_f_m_aM_aM    | 0/0;0/1;0/0;0/1     |
| chr19 | 14972742 | 14972742 | C | T | SLC1A6     | exonic | nonsynonymous SNV | SLC1A6:NM_005071:exon1:c.G169A:p.A57T,SLC1A6:NM_01272087:exon2:c.G169A:p.A57T,SLC1A6:NM_005071:exon1:c.G126C:p.Q42H,SLC1A6:NM_01272088:exon2:c.G126C:p.Q42H,SLC1A6:NM_001272087:exon4:c.G126C:p.Q42H                                                                                                                                                                                                                                                                                                                                                                                                                                                   | 1.283 |          | 4.56E-05 | 1.40E-05 | Fam121_f_m_aF_aM    | 0/0;0/1;0/1;0/0     |
| chr19 | 14972785 | 14972785 | C | G | SLC1A6     | exonic | nonsynonymous SNV | SLC1A6:NM_005071:exon1:c.G126C:p.Q42H,SLC1A6:NM_01272088:exon2:c.G126C:p.Q42H,SLC1A6:NM_001272087:exon4:c.G126C:p.Q42H                                                                                                                                                                                                                                                                                                                                                                                                                                                                                                                                 | 1.257 |          |          |          | Fam53_f_m_aM        | 0/0;0/1;0/1         |
| chr19 | 15021466 | 15021466 | G | C | CCDC105    | exonic | nonsynonymous SNV | CCDC105:NM_173482:exon4:c.G988C:p.D330H                                                                                                                                                                                                                                                                                                                                                                                                                                                                                                                                                                                                                | 1.245 | 7.35E-05 | 8.94E-05 | 4.88E-05 | Fam84_f_m_aF        | 0/1;0/0;0/1         |
| chr19 | 15179033 | 15179033 | C | A | NOTCH3     | exonic | nonsynonymous SNV | NOTCH3:NM_000435:exon22:c.G3710T:p.G1237V                                                                                                                                                                                                                                                                                                                                                                                                                                                                                                                                                                                                              | 1.273 |          |          |          | Fam117_f_m_aM_aF    | 0/0;0/1;0/0;0/1     |
| chr19 | 15184333 | 15184333 | C | A | NOTCH3     | exonic | nonsynonymous SNV | NOTCH3:NM_000435:exon16:c.G2528T:p.G843V                                                                                                                                                                                                                                                                                                                                                                                                                                                                                                                                                                                                               | 1.429 |          |          |          | Fam95_f_m_aM_aM_uF  | 0/1;0/0;0/1;0/1;0/0 |
| chr19 | 15191610 | 15191610 | C | T | NOTCH3     | exonic | nonsynonymous SNV | NOTCH3:NM_000435:exon6:c.G850A:p.A284T                                                                                                                                                                                                                                                                                                                                                                                                                                                                                                                                                                                                                 | 1.251 | 7.35E-05 | 0.0002   | 0.0002   | Fam92_f_m_aM_raM    | 0/1;0/0;0/1;0/1     |
| chr19 | 15257055 | 15257055 | T | C | BRD4       | exonic | nonsynonymous SNV | BRD4:NM_001330384:exon8:c.A1460G:p.D487G,BRD4:NM_014299:exon8:c.A1460G:p.D487G,BRD4:NM_058243:exon8:c.A1460G:p.D487G                                                                                                                                                                                                                                                                                                                                                                                                                                                                                                                                   | 1.506 |          | 1.22E-05 | 1.40E-05 | Fam87_f_m_aM_uM     | 0/1;0/0;0/1;0/1     |
| chr19 | 17102423 | 17102423 | G | A | MYO9B      | exonic | nonsynonymous SNV | MYO9B:NM_001130065:exon2:c.G706A:p.V236M,MYO9B:NM_004145:exon2:c.G706A:p.V236M                                                                                                                                                                                                                                                                                                                                                                                                                                                                                                                                                                         | 1.784 |          | 3.27E-05 | 6.98E-06 | Fam26_f_m_aM_uM     | 0/1;0/0;0/1;0/0     |
| chr19 | 17206358 | 17206358 | G | A | MYO9B      | exonic | nonsynonymous SNV | MYO9B:NM_001130065:exon33:c.G5368A:p.D1790N,MYO9B:NM_004145:exon33:c.G5368A:p.D1790N                                                                                                                                                                                                                                                                                                                                                                                                                                                                                                                                                                   | 1.024 |          |          |          | Fam50_f_m_aF        | 0/0;0/1;0/1         |

|       |          |          |   |   |                 |        |                   |                                                                                                                                                                                                                                                                 |       |          |          |          |                      |                     |
|-------|----------|----------|---|---|-----------------|--------|-------------------|-----------------------------------------------------------------------------------------------------------------------------------------------------------------------------------------------------------------------------------------------------------------|-------|----------|----------|----------|----------------------|---------------------|
| chr19 | 17207197 | 17207197 | C | A | MYO9B           | exonic | nonsynonymous SNV | MYO9B:NM_001130065:exon35:c.C5577A:p.D1859E,MYO9B:NM_004145:exon35:c.C5577A:p.D1859E                                                                                                                                                                            | 1.039 | 0.0002   | 4.88E-05 | 3.49E-05 | Fam49_f_m_aM         | 0/0;0/1;0/1         |
| chr19 | 17210358 | 17210358 | C | T | MYO9B           | exonic | nonsynonymous SNV | MYO9B:NM_001130065:exon37:c.C5774T:p.S1925L,MYO9B:NM_004145:exon37:c.C5774T:p.S1925L                                                                                                                                                                            | 1.012 | 0.0006   | 0.0002   | 9.77E-05 | Fam13_f_m_aM         | 0/1;0/0;0/1         |
| chr19 | 17215457 | 17215457 | G | A | USE1            | exonic | nonsynonymous SNV | USE1:NM_018467:exon1:c.G52A:p.E18K                                                                                                                                                                                                                              | 1.154 |          |          |          | Fam14_f_m_aM_aM      | 0/1;0/0;0/1;0/1     |
| chr19 | 17232606 | 17232606 | G | A | NR2F6           | exonic | nonsynonymous SNV | NR2F6:NM_005234:exon4:c.C961T:p.P321S                                                                                                                                                                                                                           | 1.407 |          | 4.50E-05 | 6.98E-06 | Fam17_f_m_aM_uM      | 0/0;0/1;0/1;0/0     |
| chr19 | 17339192 | 17339192 | G | C | GTPBP3          | exonic | nonsynonymous SNV | GTPBP3:NM_133644:exon5:c.G830C:p.R277T,GTPBP3:NM_001128855:exon6:c.G734C:p.R245T,GTPBP3:NM_001195422:exon6:c.G800C:p.R267T,GTPBP3:NM_032620:exon6:c.G734C:p.R245T                                                                                               | 1.201 |          | 1.13E-05 | 6.98E-06 | Fam73_f_m_aF_dM      | 0/1;0/0;0/1;0/0     |
| chr19 | 17540548 | 17540548 | G | T | NIBAN3          | exonic | nonsynonymous SNV | NIBAN3:NM_001321828:exon8:c.G407T:p.R136L,NIBAN3:NM_001321826:exon9:c.G1136T:p.R379L,NIBAN3:NM_001321827:exon9:c.G1136T:p.R379L,NIBAN3:NM_001363609:exon9:c.G1136T:p.R379L,NIBAN3:NM_001098524:exon10:c.G1229T:p.R410L,NIBAN3:NM_173544:exon10:c.G1229T:p.R410L | 1.004 | 7.35E-05 | 9.32E-05 | 5.58E-05 | Fam24_f_m_aM_aM      | 0/1;0/0;0/1;0/1     |
| chr19 | 17540548 | 17540548 | G | T | NIBAN3          | exonic | nonsynonymous SNV | NIBAN3:NM_001321828:exon8:c.G407T:p.R136L,NIBAN3:NM_001321826:exon9:c.G1136T:p.R379L,NIBAN3:NM_001321827:exon9:c.G1136T:p.R379L,NIBAN3:NM_001363609:exon9:c.G1136T:p.R379L,NIBAN3:NM_001098524:exon10:c.G1229T:p.R410L,NIBAN3:NM_173544:exon10:c.G1229T:p.R410L | 1.004 | 7.35E-05 | 9.32E-05 | 5.58E-05 | Fam40_f_m_aM_aM      | 0/1;0/0;0/1;0/1     |
| chr19 | 17581337 | 17581337 | C | T | COLGALT1        | exonic | nonsynonymous SNV | COLGALT1:NM_024656:exon12:c.C1762T:p.R588C                                                                                                                                                                                                                      | 1.143 | 0.0001   | 0.0003   | 0.0004   | Fam38_f_m_aM         | 0/0;0/1;0/1         |
| chr19 | 17581337 | 17581337 | C | T | COLGALT1        | exonic | nonsynonymous SNV | COLGALT1:NM_024656:exon12:c.C1762T:p.R588C                                                                                                                                                                                                                      | 1.143 | 0.0001   | 0.0003   | 0.0004   | Fam47_f_m_aM         | 0/1;0/0;0/1         |
| chr19 | 17617790 | 17617790 | G | T | UNC13A          | exonic | nonsynonymous SNV | UNC13A:NM_001080421:exon39:c.C4470A:p.D1490E                                                                                                                                                                                                                    | 1.871 |          |          |          | Fam91_m_aM_dM_aM_dM  | 0/1;0/1;0/0;0/1;0/0 |
| chr19 | 17618943 | 17618943 | T | A | UNC13A          | exonic | nonsynonymous SNV | UNC13A:NM_001080421:exon37:c.A4292T:p.N1431I                                                                                                                                                                                                                    | 2.095 |          | 6.47E-05 | 2.09E-05 | Fam40_f_m_aM_aM      | 0/0;0/1;0/0;0/1     |
| chr19 | 17641522 | 17641522 | C | C | UNC13A          | exonic | nonsynonymous SNV | UNC13A:NM_001080421:exon20:c.A2507G:p.N836S                                                                                                                                                                                                                     | 1.141 |          | 0.0001   | 0.0001   | Fam6_f_m_aM          | 0/1;0/0;0/1         |
| chr19 | 17734352 | 17734352 | G | A | MAP1S           | exonic | nonsynonymous SNV | MAP1S:NM_001308363:exon7:c.G3026A:p.G1009D,MAP1S:NM_018174:exon7:c.G3104A:p.G1035D                                                                                                                                                                              | 1.123 |          |          |          | Fam90_f_m_aF_dM      | 0/0;0/1;0/1;0/1     |
| chr19 | 17811968 | 17811968 | T | C | B3GNT3          | exonic | nonsynonymous SNV | B3GNT3:NM_014256:exon3:c.T965C:p.V322A                                                                                                                                                                                                                          | 1.062 | 0.0004   | 0.0006   | 0.0006   | Fam70_f_m_aM         | 0/1;0/0;0/1         |
| chr19 | 18163344 | 18163344 | C | T | PIK3R2          | exonic | nonsynonymous SNV | PIK3R2:NM_005027:exon11:c.C1372T:p.R458C                                                                                                                                                                                                                        | 1.385 |          | 1.12E-05 |          | Fam15_f_m_aM_aM      | 0/0;0/1;0/1;0/1     |
| chr19 | 18198769 | 18198769 | C | T | RAB3A           | exonic | nonsynonymous SNV | RAB3A:NM_002866:exon4:c.G428A:p.R143Q                                                                                                                                                                                                                           | 2.131 |          | 1.12E-05 |          | Fam16_f_m_aM_aM      | 0/0;0/1;0/1;0/0     |
| chr19 | 18216772 | 18216772 | C | T | PDE4C           | exonic | nonsynonymous SNV | PDE4C:NM_001369701:exon11:c.G761A:p.R254Q,PDE4C:NM_001098818:exon12:c.G1358A:p.R453Q,PDE4C:NM_001098819:exon12:c.G1136A:p.R379Q,PDE4C:NM_000923:exon13:c.G1454A:p.R485Q,PDE4C:NM_001330172:exon13:c.G1454A:p.R485Q                                              | 1.049 |          |          |          | Fam38_f_m_aM         | 0/1;0/0;0/1         |
| chr19 | 18446757 | 18446757 | T | C | ELL             | exonic | nonsynonymous SNV | ELL:NM_006532:exon9:c.A1523G:p.D508G                                                                                                                                                                                                                            | 1.795 |          |          |          | Fam110_f_m_aM_aM_uMs | 0/1;0/0;0/1;0/1;0/0 |
| chr19 | 18541870 | 18541870 | T | A | FKBP8           | exonic | nonsynonymous SNV | FKBP8:NM_001308373:exon2:c.A101T:p.E34V,FKBP8:NM_012181:exon2:c.A101T:p.E34V                                                                                                                                                                                    | 1.718 |          | 1.16E-05 |          | Fam24_f_m_aM_aM      | 0/1;0/0;0/1;0/1     |
| chr19 | 18589521 | 18589521 | C | A | REX1BD          | exonic | nonsynonymous SNV | REX1BD:NM_001100418:exon3:c.C291A:p.F97L,REX1BD:NM_001100419:exon3:c.C225A:p.F75L                                                                                                                                                                               | 1.259 |          |          |          | Fam121_f_m_aF_aM     | 0/0;0/1;0/0;0/1     |
| chr19 | 19147090 | 19147090 | C | T | BORCS8-MEF2B;IV | exonic | nonsynonymous SNV | MEF2B:NM_001145785:exon5:c.G487A:p.A163T,MEF2B:NM_001367282:exon5:c.G487A:p.A163T,BORCS8-MEF2B:NM_005919:exon7:c.G487A:p.A163T                                                                                                                                  | 1.132 |          | 0.0002   | 4.89E-05 | Fam25_f_m_aM         | 0/0;0/1;0/1         |
| chr19 | 19219115 | 19219115 | C | A | NCAN            | exonic | nonsynonymous SNV | NCAN:NM_004386:exon3:c.C274A:p.P92T                                                                                                                                                                                                                             | 1.282 | 0.0006   | 7.46E-05 | 3.49E-05 | Fam95_f_m_aM_aM_uF   | 0/0;0/1;0/1;0/1;0/0 |
| chr19 | 19219301 | 19219301 | C | G | NCAN            | exonic | nonsynonymous SNV | NCAN:NM_004386:exon3:c.C460G:p.P154A                                                                                                                                                                                                                            | 1.119 | 0.0004   | 0.0002   | 0.0001   | Fam10_f_m_aM_uF      | 0/0;0/1;0/1;0/1     |
| chr19 | 19224325 | 19224325 | C | T | NCAN            | exonic | nonsynonymous SNV | NCAN:NM_004386:exon5:c.C670T:p.R224C                                                                                                                                                                                                                            | 1.42  |          |          |          | Fam2_f_m_aF          | 0/0;0/1;0/1         |
| chr19 | 19258559 | 19258559 | G | T | HAPLN4          | exonic | nonsynonymous SNV | HAPLN4:NM_023002:exon4:c.C781A:p.R261S                                                                                                                                                                                                                          | 1.662 |          |          |          | Fam106_f_m_aM        | 0/0;0/1;0/1         |
| chr19 | 19544950 | 19544950 | C | G | CILP2           | exonic | nonsynonymous SNV | CILP2:NM_153221:exon8:c.C2405G:p.P802R                                                                                                                                                                                                                          | 1.104 |          |          |          | Fam62_f_m_aM_aM      | 0/0;0/1;0/1;0/1     |
| chr19 | 19624401 | 19624401 | C | T | LPAR2           | exonic | nonsynonymous SNV | LPAR2:NM_004720:exon3:c.G911A:p.R304H                                                                                                                                                                                                                           | 1.226 |          | 0.0006   | 2.09E-05 | Fam116_f_m_aM_aF     | 0/0;0/1;0/1;0/1     |
| chr19 | 19635030 | 19635030 | C | T | GMIP            | exonic | nonsynonymous SNV | GMIP:NM_001288998:exon15:c.G1657A:p.V553M,GMIP:NM_001288999:exon15:c.G1666A:p.V556M,GMIP:NM_0016573:exon16:c.G1744A:p.V582M                                                                                                                                     | 1.808 |          | 0.0002   | 2.09E-05 | Fam119_f_m_aM_aM     | 0/0;0/1;0/1;0/0     |
| chr19 | 29812751 | 29812751 | G | C | CCNE1           | exonic | nonsynonymous SNV | CCNE1:NM_001322262:exon2:c.G41C:p.R14T,CCNE1:NM_01238:exon3:c.G86C:p.R29T,CCNE1:NM_001322259:exon3:c.G86C:p.R29T,CCNE1:NM_001322261:exon3:c.G86C:p.R29T                                                                                                         | 1.646 |          |          |          | Fam45_f_m_aM_uF      | 0/0;0/1;0/1;0/1     |
| chr19 | 30445414 | 30445414 | T | G | ZNF536          | exonic | nonsynonymous SNV | ZNF536:NM_001352260:exon2:c.T1852G:p.Y618D,ZNF536:NM_014717:exon2:c.T1852G:p.Y618D                                                                                                                                                                              | 2.321 | 7.37E-05 | 0.0002   | 7.70E-05 | Fam74_f_m_aM_uM      | 0/0;0/1;0/1;0/1     |
| chr19 | 31278576 | 31278576 | A | G | TSHZ3           | exonic | nonsynonymous SNV | TSHZ3:NM_020856:exon2:c.T1217C:p.M406T                                                                                                                                                                                                                          | 1.139 |          |          |          | Fam44_f_m_aM_uF      | 0/1;0/0;0/1;0/0     |
| chr19 | 32864261 | 32864261 | C | T | SLC7A9          | exonic | nonsynonymous SNV | SLC7A9:NM_001126335:exon4:c.G313A:p.G105R,SLC7A9:NM_001243036:exon4:c.G313A:p.G105R,SLC7A9:NM_014270:exon4:c.G313A:p.G105R                                                                                                                                      | 1.076 | 0.0004   | 0.0006   | 0.0002   | Fam105_f_m_aM        | 0/1;0/0;0/1         |
| chr19 | 33205587 | 33205587 | G | A | LRP3            | exonic | nonsynonymous SNV | LRP3:NM_002333:exon5:c.G817A:p.A273T                                                                                                                                                                                                                            | 1.016 |          | 0.0009   | 6.98E-06 | Fam101_f_m_aM        | 0/0;0/1;0/1         |
| chr19 | 33207022 | 33207022 | G | A | LRP3            | exonic | nonsynonymous SNV | LRP3:NM_002333:exon7:c.G1760A:p.R587Q                                                                                                                                                                                                                           | 1.088 | 0.0003   | 0.0002   | 0.0003   | Fam25_f_m_aM         | 0/0;0/1;0/1         |
| chr19 | 33215911 | 33215911 | C | T | SLC7A10         | exonic | nonsynonymous SNV | SLC7A10:NM_019849:exon2:c.G214A:p.V72M                                                                                                                                                                                                                          | 1.17  |          | 0.0002   | 5.58E-05 | Fam4_f_m_aM          | 0/1;0/0;0/1         |
| chr19 | 33772506 | 33772506 | G | C | CHST8           | exonic | nonsynonymous SNV | CHST8:NM_001127896:exon4:c.G718C:p.D240H,CHST8:NM_022467:exon4:c.G718C:p.D240H,CHST8:NM_001127895:exon5:c.G718C:p.D240H                                                                                                                                         | 1.63  |          |          |          | Fam24_f_m_aM_aM      | 0/1;0/0;0/1;0/1     |
| chr19 | 34495739 | 34495739 | A | G | WTIP            | exonic | nonsynonymous SNV | WTIP:NM_001080436:exon7:c.A1120G:p.R374G                                                                                                                                                                                                                        | 1.108 | 0.0003   | 9.84E-05 | 0.0001   | Fam99_f_m_aM_aM      | 0/1;0/0;0/0;0/1     |

|       |          |          |   |   |          |        |                   |                                                                                                                                                                                                                                                                                                                                                                                                                                                                                                                                                                                                                                                                                                                                                                                                                                                                                                                                                                                                                                                                                                                                                                                                                                                                                                                                                                                                                                                                                                                                                                                                                                                                                                                                                                                                                                                                                                                                                                                                           |       |          |          |                    |                     |                     |
|-------|----------|----------|---|---|----------|--------|-------------------|-----------------------------------------------------------------------------------------------------------------------------------------------------------------------------------------------------------------------------------------------------------------------------------------------------------------------------------------------------------------------------------------------------------------------------------------------------------------------------------------------------------------------------------------------------------------------------------------------------------------------------------------------------------------------------------------------------------------------------------------------------------------------------------------------------------------------------------------------------------------------------------------------------------------------------------------------------------------------------------------------------------------------------------------------------------------------------------------------------------------------------------------------------------------------------------------------------------------------------------------------------------------------------------------------------------------------------------------------------------------------------------------------------------------------------------------------------------------------------------------------------------------------------------------------------------------------------------------------------------------------------------------------------------------------------------------------------------------------------------------------------------------------------------------------------------------------------------------------------------------------------------------------------------------------------------------------------------------------------------------------------------|-------|----------|----------|--------------------|---------------------|---------------------|
| chr19 | 35021578 | 35021578 | G | A | GRAMD1A  | exonic | nonsynonymous SNV | GRAMD1A:NM_001136199:exon13:c.G1531A;p.G5115,GRAMD1A:NM_001320035:exon13:c.G850A;p.G2845,GRAMD1A:NM_001320034:exon14:c.G1552A;p.G5185,GRAMD1A:NM_020895:exon14:c.G1552A;p.G5185,GRAMD1A:NM_001320036:exon15:c.G1810A;p.G6045                                                                                                                                                                                                                                                                                                                                                                                                                                                                                                                                                                                                                                                                                                                                                                                                                                                                                                                                                                                                                                                                                                                                                                                                                                                                                                                                                                                                                                                                                                                                                                                                                                                                                                                                                                              | 1.101 | 2.24E-05 | 6.98E-06 | Fam10_f_m_aM_uF    | 0/0;0/1;0/1;0/1     |                     |
| chr19 | 35059888 | 35059888 | C | A | HPN      | exonic | nonsynonymous SNV | HPN:NM_182983:exon6:c.C305A;p.S102Y,HPN:NM_002151:exon7:c.C305A;p.S102Y                                                                                                                                                                                                                                                                                                                                                                                                                                                                                                                                                                                                                                                                                                                                                                                                                                                                                                                                                                                                                                                                                                                                                                                                                                                                                                                                                                                                                                                                                                                                                                                                                                                                                                                                                                                                                                                                                                                                   | 1.4   |          |          | Fam12_f_m_aM_uM_aM | 0/0;0/1;0/0;0/0;0/1 |                     |
| chr19 | 35351934 | 35351934 | C | A | FFAR1    | exonic | nonsynonymous SNV | FFAR1:NM_005303:exon1:c.C383A;p.A128E                                                                                                                                                                                                                                                                                                                                                                                                                                                                                                                                                                                                                                                                                                                                                                                                                                                                                                                                                                                                                                                                                                                                                                                                                                                                                                                                                                                                                                                                                                                                                                                                                                                                                                                                                                                                                                                                                                                                                                     | 1.351 | 6.55E-05 |          | Fam57_f_m_aM_uF    | 0/1;0/0;0/1;0/1     |                     |
| chr19 | 35778298 | 35778298 | C | T | ARHGAP33 | exonic | nonsynonymous SNV | ARHGAP33:NM_001366178:exon4:c.C208T;p.R70C,ARHGAP33:NM_052948:exon4:c.C208T;p.R70C,NFKBID:NM_001321831:exon11:c.C818T;p.P273L,NFKBID:NM_001365705:exon11:c.C773T;p.P258L,NFKBID:NM_032721:exon11:c.C1229T;p.P410L,NFKBID:NM_139239:exon11:c.C773T;p.P258L,NFKBID:NM_001321831:exon7:c.C383T;p.A128V,NFKBID:NM_001365705:exon7:c.C388T;p.A113V,NFKBID:NM_001365706:exon7:c.C388T;p.A113V,NFKBID:NM_032721:exon7:c.C794T;p.A265V,NFKBID:NM_139239:exon7:c.C388T;p.A113V,NFKBID:NM_001321831:exon7:c.C383T;p.A128V,NFKBID:NM_001365705:exon7:c.C388T;p.A113V,NFKBID:NM_001365706:exon7:c.C388T;p.A113V,NFKBID:NM_032721:exon7:c.C794T;p.A265V,NFKBID:NM_139239:exon7:c.C388T;p.A113V                                                                                                                                                                                                                                                                                                                                                                                                                                                                                                                                                                                                                                                                                                                                                                                                                                                                                                                                                                                                                                                                                                                                                                                                                                                                                                                         | 1.583 | 7.35E-05 | 0.0006   | 0.0003             | Fam33_f_m_aM_uM     | 0/0;0/1;0/1;0/1     |
| chr19 | 35890005 | 35890005 | G | A | NFKBID   | exonic | nonsynonymous SNV | NFKBID:NM_001365705:exon11:c.C773T;p.P258L,NFKBID:NM_032721:exon11:c.C1229T;p.P410L,NFKBID:NM_139239:exon11:c.C773T;p.P258L,NFKBID:NM_001321831:exon7:c.C383T;p.A128V,NFKBID:NM_001365705:exon7:c.C388T;p.A113V,NFKBID:NM_001365706:exon7:c.C388T;p.A113V,NFKBID:NM_032721:exon7:c.C794T;p.A265V,NFKBID:NM_139239:exon7:c.C388T;p.A113V,NFKBID:NM_001321831:exon7:c.C383T;p.A128V,NFKBID:NM_001365705:exon7:c.C388T;p.A113V,NFKBID:NM_001365706:exon7:c.C388T;p.A113V,NFKBID:NM_032721:exon7:c.C794T;p.A265V,NFKBID:NM_139239:exon7:c.C388T;p.A113V                                                                                                                                                                                                                                                                                                                                                                                                                                                                                                                                                                                                                                                                                                                                                                                                                                                                                                                                                                                                                                                                                                                                                                                                                                                                                                                                                                                                                                                       | 1.326 | 1.20E-05 |          | Fam72_f_m_aF_uF    | 0/0;0/1;0/1;0/1     |                     |
| chr19 | 35896459 | 35896459 | G | A | NFKBID   | exonic | nonsynonymous SNV | NFKBID:NM_001365705:exon7:c.C388T;p.A113V,NFKBID:NM_001365706:exon7:c.C388T;p.A113V,NFKBID:NM_032721:exon7:c.C794T;p.A265V,NFKBID:NM_139239:exon7:c.C388T;p.A113V,NFKBID:NM_001321831:exon7:c.C383T;p.A128V,NFKBID:NM_001365705:exon7:c.C388T;p.A113V,NFKBID:NM_001365706:exon7:c.C388T;p.A113V,NFKBID:NM_032721:exon7:c.C794T;p.A265V,NFKBID:NM_139239:exon7:c.C388T;p.A113V                                                                                                                                                                                                                                                                                                                                                                                                                                                                                                                                                                                                                                                                                                                                                                                                                                                                                                                                                                                                                                                                                                                                                                                                                                                                                                                                                                                                                                                                                                                                                                                                                             | 1.798 | 0.0001   | 0.0002   | 5.58E-05           | Fam52_f_m_aM        | 0/0;0/1;0/1         |
| chr19 | 35896459 | 35896459 | G | A | NFKBID   | exonic | nonsynonymous SNV | NFKBID:NM_001365705:exon7:c.C388T;p.A113V,NFKBID:NM_001365706:exon7:c.C388T;p.A113V,NFKBID:NM_032721:exon7:c.C794T;p.A265V,NFKBID:NM_139239:exon7:c.C388T;p.A113V,NFKBID:NM_001321831:exon7:c.C383T;p.A128V,NFKBID:NM_001365705:exon7:c.C388T;p.A113V,NFKBID:NM_001365706:exon7:c.C388T;p.A113V,NFKBID:NM_032721:exon7:c.C794T;p.A265V,NFKBID:NM_139239:exon7:c.C388T;p.A113V                                                                                                                                                                                                                                                                                                                                                                                                                                                                                                                                                                                                                                                                                                                                                                                                                                                                                                                                                                                                                                                                                                                                                                                                                                                                                                                                                                                                                                                                                                                                                                                                                             | 1.798 | 0.0001   | 0.0002   | 5.58E-05           | Fam33_f_m_aM_uM     | 0/1;0/0;0/1;0/0     |
| chr19 | 35903786 | 35903786 | T | C | HCST     | exonic | nonsynonymous SNV | HCST:NM_001007469:exon3:c.T124C;p.C42R,HCST:NM_014266:exon3:c.T124C;p.C42R                                                                                                                                                                                                                                                                                                                                                                                                                                                                                                                                                                                                                                                                                                                                                                                                                                                                                                                                                                                                                                                                                                                                                                                                                                                                                                                                                                                                                                                                                                                                                                                                                                                                                                                                                                                                                                                                                                                                | 1.893 | 0.0004   | 0.0008   | 0.0004             | Fam10_f_m_aM_uF     | 0/1;0/0;0/1;0/1     |
| chr19 | 36393196 | 36393196 | T | A | ZFP82    | exonic | nonsynonymous SNV | ZFP82:NM_001321917:exon5:c.A1147T;p.I383F,ZFP82:NM_133466:exon5:c.A1144T;p.I382F                                                                                                                                                                                                                                                                                                                                                                                                                                                                                                                                                                                                                                                                                                                                                                                                                                                                                                                                                                                                                                                                                                                                                                                                                                                                                                                                                                                                                                                                                                                                                                                                                                                                                                                                                                                                                                                                                                                          | 1.572 |          |          | Fam48_f_m_aM_uM    | 0/0;0/1;0/1;0/1     |                     |
| chr19 | 38081641 | 38081641 | C | T | SIPA1L3  | exonic | nonsynonymous SNV | SIPA1L3:NM_015073:exon3:c.C76T;p.L26F                                                                                                                                                                                                                                                                                                                                                                                                                                                                                                                                                                                                                                                                                                                                                                                                                                                                                                                                                                                                                                                                                                                                                                                                                                                                                                                                                                                                                                                                                                                                                                                                                                                                                                                                                                                                                                                                                                                                                                     | 1.095 |          |          | Fam34_f_m_aM_uF    | 0/0;0/1;0/1;0/0     |                     |
| chr19 | 38081641 | 38081641 | C | T | SIPA1L3  | exonic | nonsynonymous SNV | SIPA1L3:NM_015073:exon3:c.C76T;p.L26F                                                                                                                                                                                                                                                                                                                                                                                                                                                                                                                                                                                                                                                                                                                                                                                                                                                                                                                                                                                                                                                                                                                                                                                                                                                                                                                                                                                                                                                                                                                                                                                                                                                                                                                                                                                                                                                                                                                                                                     | 1.095 |          |          | Fam62_f_m_aM_aM    | 0/1;0/0;0/1;0/0     |                     |
| chr19 | 38082472 | 38082472 | C | G | SIPA1L3  | exonic | nonsynonymous SNV | SIPA1L3:NM_015073:exon3:c.C907G;p.R303G                                                                                                                                                                                                                                                                                                                                                                                                                                                                                                                                                                                                                                                                                                                                                                                                                                                                                                                                                                                                                                                                                                                                                                                                                                                                                                                                                                                                                                                                                                                                                                                                                                                                                                                                                                                                                                                                                                                                                                   | 1.461 | 0.0002   | 9.02E-05 | 4.19E-05           | Fam40_f_m_aM_aM     | 0/1;0/0;0/1;0/1     |
| chr19 | 38130651 | 38130651 | G | A | SIPA1L3  | exonic | nonsynonymous SNV | SIPA1L3:NM_015073:exon10:c.G3022A;p.V1008M,RASGRP4:NM_001146206:exon11:c.C1141T;p.R381C,RASGRP4:NM_001146207:exon12:c.C1417T;p.R473C,RASGRP4:NM_001146203:exon13:c.C1432T;p.R478C,RASGRP4:NM_001146202:exon14:c.C166T;p.R556C,RASGRP4:NM_001146204:exon14:c.C1501T;p.R501C,RASGRP4:NM_001146205:exon14:c.C1606T;p.R536C,RASGRP4:NM_170604:exon14:c.C1708T;p.R570C,RYR1:NM_000540:exon28:c.C3800A;p.P1267H,RYR1:NM_01042723:exon28:c.C3800A;p.P1267H,MAP4K1:NM_001042600:exon26:c.G2047A;p.G683R,MAP4K1:NM_007181:exon26:c.G2047A;p.G683R,MAP4K1:NM_001042600:exon23:c.G1714A;p.E572K,MAP4K1:NM_007181:exon23:c.G1714A;p.E572K,NFKBIB:NM_001243116:exon5:c.C550T;p.R184C,NFKBIB:NM_001369699:exon5:c.C808T;p.R270C,NFKBIB:NM_001369700:exon5:c.C532T;p.R178C,NFKBIB:NM_002503:exon5:c.C808T;p.R270C,NFKBIB:NM_001243116:exon5:c.G632A;p.G211E,NFKBIB:NM_001369699:exon5:c.G890A;p.G297E,NFKBIB:NM_001369700:exon5:c.G614A;p.G205E,NFKBIB:NM_002503:exon5:c.G890A;p.G297E,ACP7:NM_001363687:exon7:c.A697C;p.T233P,ACP7:NM_01004318:exon8:c.A821C;p.N274T,PAF1:NM_001256826:exon2:c.C114G;p.F38L,PAF1:NM_019088:exon3:c.C144G;p.F48L,TIMM50:NM_001001563:exon1:c.T44G;p.L15R,DLL3:NM_016941:exon7:c.G1264A;p.G422S,DLL3:NM_203486:exon7:c.G1264A;p.G422S,DYRK1B:NM_004714:exon11:c.G1652C;p.R551P,DYRK1B:NM_006483:exon11:c.G1532C;p.R511P,DYRK1B:NM_006484:exon12:c.G1568C;p.R523P,DYRK1B:NM_004714:exon9:c.C1228T;p.R410C,DYRK1B:NM_006483:exon9:c.C1108T;p.R370C,DYRK1B:NM_006484:exon10:c.C1144T;p.R382C,DYRK1B:NM_004714:exon4:c.C316T;p.R106C,DYRK1B:NM_006484:exon4:c.C316T;p.R106C,MAP3K10:NM_002446:exon1:c.G58T;p.V20F,SHKBP1:NM_138392:exon4:c.T227C;p.L76P,LTBP4:NM_001042545:exon13:c.T1993C;p.S665P,LTBP4:NM_001042544:exon16:c.T2194C;p.S732P,LTBP4:NM_003573:exon16:c.T2083C;p.S695P,NUMBL:NM_001289979:exon6:c.G470A;p.R157Q,NUMBL:NM_001289980:exon6:c.G470A;p.R157Q,NUMBL:NM_004756:exon7:c.G593A;p.R198Q,COQ8B:NM_001142555:exon9:c.G743A;p.R248H,COQ8B:NM_024876:exon10:c.G866A;p.R289H | 1.294 |          | 1.12E-05 | 1.40E-05           | Fam119_f_m_aM_aM    | 0/1;0/0;0/1;0/1     |
| chr19 | 38411354 | 38411354 | G | A | RASGRP4  | exonic | nonsynonymous SNV | RASGRP4:NM_001146206:exon11:c.C1141T;p.R381C,RASGRP4:NM_001146207:exon12:c.C1417T;p.R473C,RASGRP4:NM_001146203:exon13:c.C1432T;p.R478C,RASGRP4:NM_001146202:exon14:c.C166T;p.R556C,RASGRP4:NM_001146204:exon14:c.C1501T;p.R501C,RASGRP4:NM_001146205:exon14:c.C1606T;p.R536C,RASGRP4:NM_170604:exon14:c.C1708T;p.R570C,RYR1:NM_000540:exon28:c.C3800A;p.P1267H,RYR1:NM_01042723:exon28:c.C3800A;p.P1267H,MAP4K1:NM_001042600:exon26:c.G2047A;p.G683R,MAP4K1:NM_007181:exon26:c.G2047A;p.G683R,MAP4K1:NM_001042600:exon23:c.G1714A;p.E572K,MAP4K1:NM_007181:exon23:c.G1714A;p.E572K,NFKBIB:NM_001243116:exon5:c.C550T;p.R184C,NFKBIB:NM_001369699:exon5:c.C808T;p.R270C,NFKBIB:NM_001369700:exon5:c.C532T;p.R178C,NFKBIB:NM_002503:exon5:c.C808T;p.R270C,NFKBIB:NM_001243116:exon5:c.G632A;p.G211E,NFKBIB:NM_001369699:exon5:c.G890A;p.G297E,NFKBIB:NM_001369700:exon5:c.G614A;p.G205E,NFKBIB:NM_002503:exon5:c.G890A;p.G297E,ACP7:NM_001363687:exon7:c.A697C;p.T233P,ACP7:NM_01004318:exon8:c.A821C;p.N274T,PAF1:NM_001256826:exon2:c.C114G;p.F38L,PAF1:NM_019088:exon3:c.C144G;p.F48L,TIMM50:NM_001001563:exon1:c.T44G;p.L15R,DLL3:NM_016941:exon7:c.G1264A;p.G422S,DLL3:NM_203486:exon7:c.G1264A;p.G422S,DYRK1B:NM_004714:exon11:c.G1652C;p.R551P,DYRK1B:NM_006483:exon11:c.G1532C;p.R511P,DYRK1B:NM_006484:exon12:c.G1568C;p.R523P,DYRK1B:NM_004714:exon9:c.C1228T;p.R410C,DYRK1B:NM_006483:exon9:c.C1108T;p.R370C,DYRK1B:NM_006484:exon10:c.C1144T;p.R382C,DYRK1B:NM_004714:exon4:c.C316T;p.R106C,DYRK1B:NM_006484:exon4:c.C316T;p.R106C,MAP3K10:NM_002446:exon1:c.G58T;p.V20F,SHKBP1:NM_138392:exon4:c.T227C;p.L76P,LTBP4:NM_001042545:exon13:c.T1993C;p.S665P,LTBP4:NM_001042544:exon16:c.T2194C;p.S732P,LTBP4:NM_003573:exon16:c.T2083C;p.S695P,NUMBL:NM_001289979:exon6:c.G470A;p.R157Q,NUMBL:NM_001289980:exon6:c.G470A;p.R157Q,NUMBL:NM_004756:exon7:c.G593A;p.R198Q,COQ8B:NM_001142555:exon9:c.G743A;p.R248H,COQ8B:NM_024876:exon10:c.G866A;p.R289H                                            | 1.147 | 0.0001   | 0.0003   | 0.0002             | Fam115_f_m_aF_aM_aF | 0/1;0/0;0/1;0/1;0/0 |
| chr19 | 38473411 | 38473411 | C | A | RYR1     | exonic | nonsynonymous SNV | RYR1:NM_000540:exon28:c.C3800A;p.P1267H,RYR1:NM_01042723:exon28:c.C3800A;p.P1267H,MAP4K1:NM_001042600:exon26:c.G2047A;p.G683R,MAP4K1:NM_007181:exon26:c.G2047A;p.G683R,MAP4K1:NM_001042600:exon23:c.G1714A;p.E572K,MAP4K1:NM_007181:exon23:c.G1714A;p.E572K,NFKBIB:NM_001243116:exon5:c.C550T;p.R184C,NFKBIB:NM_001369699:exon5:c.C808T;p.R270C,NFKBIB:NM_001369700:exon5:c.C532T;p.R178C,NFKBIB:NM_002503:exon5:c.C808T;p.R270C,NFKBIB:NM_001243116:exon5:c.G632A;p.G211E,NFKBIB:NM_001369699:exon5:c.G890A;p.G297E,NFKBIB:NM_001369700:exon5:c.G614A;p.G205E,NFKBIB:NM_002503:exon5:c.G890A;p.G297E,ACP7:NM_001363687:exon7:c.A697C;p.T233P,ACP7:NM_01004318:exon8:c.A821C;p.N274T,PAF1:NM_001256826:exon2:c.C114G;p.F38L,PAF1:NM_019088:exon3:c.C144G;p.F48L,TIMM50:NM_001001563:exon1:c.T44G;p.L15R,DLL3:NM_016941:exon7:c.G1264A;p.G422S,DLL3:NM_203486:exon7:c.G1264A;p.G422S,DYRK1B:NM_004714:exon11:c.G1652C;p.R551P,DYRK1B:NM_006483:exon11:c.G1532C;p.R511P,DYRK1B:NM_006484:exon12:c.G1568C;p.R523P,DYRK1B:NM_004714:exon9:c.C1228T;p.R410C,DYRK1B:NM_006483:exon9:c.C1108T;p.R370C,DYRK1B:NM_006484:exon10:c.C1144T;p.R382C,DYRK1B:NM_004714:exon4:c.C316T;p.R106C,DYRK1B:NM_006484:exon4:c.C316T;p.R106C,MAP3K10:NM_002446:exon1:c.G58T;p.V20F,SHKBP1:NM_138392:exon4:c.T227C;p.L76P,LTBP4:NM_001042545:exon13:c.T1993C;p.S665P,LTBP4:NM_001042544:exon16:c.T2194C;p.S732P,LTBP4:NM_003573:exon16:c.T2083C;p.S695P,NUMBL:NM_001289979:exon6:c.G470A;p.R157Q,NUMBL:NM_001289980:exon6:c.G470A;p.R157Q,NUMBL:NM_004756:exon7:c.G593A;p.R198Q,COQ8B:NM_001142555:exon9:c.G743A;p.R248H,COQ8B:NM_024876:exon10:c.G866A;p.R289H                                                                                                                                                                                                                                                                                                                                                                   | 1.107 |          | 6.54E-05 |                    | Fam10_f_m_aM_uF     | 0/1;0/0;0/1;0/1     |
| chr19 | 38596381 | 38596381 | C | T | MAP4K1   | exonic | nonsynonymous SNV | MAP4K1:NM_001042600:exon26:c.G2047A;p.G683R,MAP4K1:NM_007181:exon26:c.G2047A;p.G683R,MAP4K1:NM_001042600:exon23:c.G1714A;p.E572K,MAP4K1:NM_007181:exon23:c.G1714A;p.E572K,NFKBIB:NM_001243116:exon5:c.C550T;p.R184C,NFKBIB:NM_001369699:exon5:c.C808T;p.R270C,NFKBIB:NM_001369700:exon5:c.C532T;p.R178C,NFKBIB:NM_002503:exon5:c.C808T;p.R270C,NFKBIB:NM_001243116:exon5:c.G632A;p.G211E,NFKBIB:NM_001369699:exon5:c.G890A;p.G297E,NFKBIB:NM_001369700:exon5:c.G614A;p.G205E,NFKBIB:NM_002503:exon5:c.G890A;p.G297E,ACP7:NM_001363687:exon7:c.A697C;p.T233P,ACP7:NM_01004318:exon8:c.A821C;p.N274T,PAF1:NM_001256826:exon2:c.C114G;p.F38L,PAF1:NM_019088:exon3:c.C144G;p.F48L,TIMM50:NM_001001563:exon1:c.T44G;p.L15R,DLL3:NM_016941:exon7:c.G1264A;p.G422S,DLL3:NM_203486:exon7:c.G1264A;p.G422S,DYRK1B:NM_004714:exon11:c.G1652C;p.R551P,DYRK1B:NM_006483:exon11:c.G1532C;p.R511P,DYRK1B:NM_006484:exon12:c.G1568C;p.R523P,DYRK1B:NM_004714:exon9:c.C1228T;p.R410C,DYRK1B:NM_006483:exon9:c.C1108T;p.R370C,DYRK1B:NM_006484:exon10:c.C1144T;p.R382C,DYRK1B:NM_004714:exon4:c.C316T;p.R106C,DYRK1B:NM_006484:exon4:c.C316T;p.R106C,MAP3K10:NM_002446:exon1:c.G58T;p.V20F,SHKBP1:NM_138392:exon4:c.T227C;p.L76P,LTBP4:NM_001042545:exon13:c.T1993C;p.S665P,LTBP4:NM_001042544:exon16:c.T2194C;p.S732P,LTBP4:NM_003573:exon16:c.T2083C;p.S695P,NUMBL:NM_001289979:exon6:c.G470A;p.R157Q,NUMBL:NM_001289980:exon6:c.G470A;p.R157Q,NUMBL:NM_004756:exon7:c.G593A;p.R198Q,COQ8B:NM_001142555:exon9:c.G743A;p.R248H,COQ8B:NM_024876:exon10:c.G866A;p.R289H                                                                                                                                                                                                                                                                                                                                                                                                                                                     | 1.841 |          | 1.30E-05 | 1.40E-05           | Fam54_f_m_aM_uF     | 0/1;0/0;0/1;0/1     |
| chr19 | 38597550 | 38597550 | C | T | MAP4K1   | exonic | nonsynonymous SNV | MAP4K1:NM_001042600:exon23:c.G1714A;p.E572K,MAP4K1:NM_007181:exon23:c.G1714A;p.E572K,NFKBIB:NM_001243116:exon5:c.C550T;p.R184C,NFKBIB:NM_001369699:exon5:c.C808T;p.R270C,NFKBIB:NM_001369700:exon5:c.C532T;p.R178C,NFKBIB:NM_002503:exon5:c.C808T;p.R270C,NFKBIB:NM_001243116:exon5:c.G632A;p.G211E,NFKBIB:NM_001369699:exon5:c.G890A;p.G297E,NFKBIB:NM_001369700:exon5:c.G614A;p.G205E,NFKBIB:NM_002503:exon5:c.G890A;p.G297E,ACP7:NM_001363687:exon7:c.A697C;p.T233P,ACP7:NM_01004318:exon8:c.A821C;p.N274T,PAF1:NM_001256826:exon2:c.C114G;p.F38L,PAF1:NM_019088:exon3:c.C144G;p.F48L,TIMM50:NM_001001563:exon1:c.T44G;p.L15R,DLL3:NM_016941:exon7:c.G1264A;p.G422S,DLL3:NM_203486:exon7:c.G1264A;p.G422S,DYRK1B:NM_004714:exon11:c.G1652C;p.R551P,DYRK1B:NM_006483:exon11:c.G1532C;p.R511P,DYRK1B:NM_006484:exon12:c.G1568C;p.R523P,DYRK1B:NM_004714:exon9:c.C1228T;p.R410C,DYRK1B:NM_006483:exon9:c.C1108T;p.R370C,DYRK1B:NM_006484:exon10:c.C1144T;p.R382C,DYRK1B:NM_004714:exon4:c.C316T;p.R106C,DYRK1B:NM_006484:exon4:c.C316T;p.R106C,MAP3K10:NM_002446:exon1:c.G58T;p.V20F,SHKBP1:NM_138392:exon4:c.T227C;p.L76P,LTBP4:NM_001042545:exon13:c.T1993C;p.S665P,LTBP4:NM_001042544:exon16:c.T2194C;p.S732P,LTBP4:NM_003573:exon16:c.T2083C;p.S695P,NUMBL:NM_001289979:exon6:c.G470A;p.R157Q,NUMBL:NM_001289980:exon6:c.G470A;p.R157Q,NUMBL:NM_004756:exon7:c.G593A;p.R198Q,COQ8B:NM_001142555:exon9:c.G743A;p.R248H,COQ8B:NM_024876:exon10:c.G866A;p.R289H                                                                                                                                                                                                                                                                                                                                                                                                                                                                                                                                          | 1.907 |          |          |                    | Fam35_f_m_aF_uM     | 0/1;0/0;0/1;0/1     |
| chr19 | 38907498 | 38907498 | C | T | NFKBIB   | exonic | nonsynonymous SNV | NFKBIB:NM_001243116:exon5:c.C550T;p.R184C,NFKBIB:NM_001369699:exon5:c.C808T;p.R270C,NFKBIB:NM_001369700:exon5:c.C532T;p.R178C,NFKBIB:NM_002503:exon5:c.C808T;p.R270C,NFKBIB:NM_001243116:exon5:c.G632A;p.G211E,NFKBIB:NM_001369699:exon5:c.G890A;p.G297E,NFKBIB:NM_001369700:exon5:c.G614A;p.G205E,NFKBIB:NM_002503:exon5:c.G890A;p.G297E,ACP7:NM_001363687:exon7:c.A697C;p.T233P,ACP7:NM_01004318:exon8:c.A821C;p.N274T,PAF1:NM_001256826:exon2:c.C114G;p.F38L,PAF1:NM_019088:exon3:c.C144G;p.F48L,TIMM50:NM_001001563:exon1:c.T44G;p.L15R,DLL3:NM_016941:exon7:c.G1264A;p.G422S,DLL3:NM_203486:exon7:c.G1264A;p.G422S,DYRK1B:NM_004714:exon11:c.G1652C;p.R551P,DYRK1B:NM_006483:exon11:c.G1532C;p.R511P,DYRK1B:NM_006484:exon12:c.G1568C;p.R523P,DYRK1B:NM_004714:exon9:c.C1228T;p.R410C,DYRK1B:NM_006483:exon9:c.C1108T;p.R370C,DYRK1B:NM_006484:exon10:c.C1144T;p.R382C,DYRK1B:NM_004714:exon4:c.C316T;p.R106C,DYRK1B:NM_006484:exon4:c.C316T;p.R106C,MAP3K10:NM_002446:exon1:c.G58T;p.V20F,SHKBP1:NM_138392:exon4:c.T227C;p.L76P,LTBP4:NM_001042545:exon13:c.T1993C;p.S665P,LTBP4:NM_001042544:exon16:c.T2194C;p.S732P,LTBP4:NM_003573:exon16:c.T2083C;p.S695P,NUMBL:NM_001289979:exon6:c.G470A;p.R157Q,NUMBL:NM_001289980:exon6:c.G470A;p.R157Q,NUMBL:NM_004756:exon7:c.G593A;p.R198Q,COQ8B:NM_001142555:exon9:c.G743A;p.R248H,COQ8B:NM_024876:exon10:c.G866A;p.R289H                                                                                                                                                                                                                                                                                                                                                                                                                                                                                                                                                                                                                               | 1.21  | 7.35E-05 | 0.0004   | 1.40E-05           | Fam114_f_m_aM       | 0/1;0/0;0/1         |
| chr19 | 38907580 | 38907580 | G | A | NFKBIB   | exonic | nonsynonymous SNV |                                                                                                                                                                                                                                                                                                                                                                                                                                                                                                                                                                                                                                                                                                                                                                                                                                                                                                                                                                                                                                                                                                                                                                                                                                                                                                                                                                                                                                                                                                                                                                                                                                                                                                                                                                                                                                                                                                                                                                                                           |       |          |          |                    |                     |                     |

|       |          |          |   |   |         |        |                   |                                                                                                                                                                                                                                                                                                    |       |       |          |          |          |                      |                     |
|-------|----------|----------|---|---|---------|--------|-------------------|----------------------------------------------------------------------------------------------------------------------------------------------------------------------------------------------------------------------------------------------------------------------------------------------------|-------|-------|----------|----------|----------|----------------------|---------------------|
| chr19 | 40718213 | 40718213 | G | C | ITPKC   | exonic | nonsynonymous SNV | ITPKC:NM_025194:exon1:c.G1078C;p.A360P                                                                                                                                                                                                                                                             | 1.326 | .     | .        | .        | .        | Fam64_f_m_aM         | 0/0;0/1;0/1         |
| chr19 | 40800709 | 40800709 | C | T | EGLN2   | exonic | nonsynonymous SNV | EGLN2:NM_053046:exon2:c.C1377T;p.P46L;EGLN2:NM_080732:exon2:c.C1377T;p.P46L                                                                                                                                                                                                                        | 1.528 | .     | 6.18E-05 | .        | 6.98E-06 | Fam22_f_m_aF_aF_uF   | 0/1;0/0;0/1;0/1;0/0 |
| chr19 | 41197851 | 41197851 | G | A | CYP2S1  | exonic | nonsynonymous SNV | CYP2S1:NM_030622:exon3:c.G416A;p.G139D                                                                                                                                                                                                                                                             | 1.136 | .     | .        | .        | .        | Fam87_f_m_aM_uM      | 0/1;0/0;0/1;0/1     |
| chr19 | 41198537 | 41198537 | G | A | CYP2S1  | exonic | nonsynonymous SNV | CYP2S1:NM_030622:exon4:c.G569A;p.R190H                                                                                                                                                                                                                                                             | 1.107 | .     | 7.36E-05 | 2.23E-05 | .        | Fam17_f_m_aM_uM      | 0/1;0/0;0/1;0/0     |
| chr19 | 41397216 | 41397216 | A | G | EXOSC5  | exonic | nonsynonymous SNV | EXOSC5:NM_020158:exon1:c.T113C;p.L38P                                                                                                                                                                                                                                                              | 1.012 | .     | .        | .        | .        | Fam88_f_m_aF         | 0/0;0/1;0/1         |
| chr19 | 41879134 | 41879134 | C | T | CD79A   | exonic | nonsynonymous SNV | CD79A:NM_001783:exon2:c.C224T;p.T75M;CD79A:NM_021601:exon2:c.C224T;p.T75M                                                                                                                                                                                                                          | 1.225 | .     | .        | 0.001    | 0.0001   | Fam32_f_m_aM_uM      | 0/0;0/1;0/1;0/1     |
| chr19 | 42042595 | 42042595 | G | A | GRIK5   | exonic | nonsynonymous SNV | GRIK5:NM_001301030:exon11:c.C1430T;p.P477L;GRIK5:NM_002088:exon11:c.C1430T;p.P477L                                                                                                                                                                                                                 | 1.947 | .     | .        | .        | .        | Fam89_f_m_aM         | 0/1;0/0;0/1         |
| chr19 | 42216709 | 42216709 | G | A | DEDD2   | exonic | nonsynonymous SNV | DEDD2:NM_001270615:exon2:c.C299T;p.P100L;DEDD2:NM_133328:exon2:c.C299T;p.P100L                                                                                                                                                                                                                     | 1.651 | .     | .        | 7.79E-05 | 6.98E-06 | Fam9_f_m_aM_dM_uF    | 0/1;0/0;0/1;0/1;0/1 |
| chr19 | 42242290 | 42242290 | C | T | GSK3A   | exonic | nonsynonymous SNV | GSK3A:NM_019884:exon1:c.G176A;p.G59D                                                                                                                                                                                                                                                               | 1.267 | .     | .        | .        | .        | Fam20_f_m_aM_uF      | 0/0;0/1;0/1;0/0     |
| chr19 | 42249238 | 42249238 | C | T | ERF     | exonic | nonsynonymous SNV | ERF:NM_001301035:exon4:c.G649A;p.G217R;ERF:NM_001301035:exon4:c.G649A;p.G217R;ERF:NM_001312656:exon4:c.G649A;p.G217R;ERF:NM_006494:exon4:c.G874A;p.G292R                                                                                                                                           | 1.756 | .     | 0.0003   | 6.49E-05 | 1.40E-05 | Fam107_f_m_aM        | 0/1;0/0;0/1         |
| chr19 | 42249926 | 42249926 | G | T | ERF     | exonic | nonsynonymous SNV | ERF:NM_001301035:exon3:c.C49A;p.R175;ERF:NM_001301035:exon3:c.C49A;p.R175;ERF:NM_001312656:exon3:c.C49A;p.R175;ERF:NM_006494:exon3:c.C274A;p.R92S                                                                                                                                                  | 1.729 | .     | .        | .        | .        | Fam1_f_m_aM          | 0/1;0/0;0/1         |
| chr19 | 42375771 | 42375771 | G | A | MEGF8   | exonic | nonsynonymous SNV | MEGF8:NM_001410:exon41:c.G7333A;p.V2445M;MEGF8:NM_001271938:exon42:c.G7534A;p.V2445M                                                                                                                                                                                                               | 1.282 | .     | 0.0006   | 0.0008   | 0.0002   | Fam28_f_m_aF_uF      | 0/1;0/0;0/1;0/1     |
| chr19 | 43719174 | 43719174 | G | A | IRGC    | exonic | nonsynonymous SNV | IRGC:NM_019612:exon2:c.G616A;p.G206S                                                                                                                                                                                                                                                               | 1.221 | .     | .        | 3.31E-05 | .        | Fam16_f_m_aM_aM      | 0/1;0/0;0/1;0/1     |
| chr19 | 44647327 | 44647327 | T | C | PVR     | exonic | nonsynonymous SNV | PVR:NM_001135768:exon2:c.T184C;p.S62P;PVR:NM_001135770:exon2:c.T184C;p.S62P;PVR:NM_006505:exon2:c.T184C;p.S62P                                                                                                                                                                                     | 1.234 | .     | .        | .        | .        | Fam12_f_m_aM_uM_aM   | 0/1;0/0;0/1;0/0;0/0 |
| chr19 | 44781044 | 44781044 | G | A | CBLC    | exonic | nonsynonymous SNV | CBLC:NM_001130852:exon2:c.G493A;p.G165R;CBLC:NM_012116:exon2:c.G493A;p.G165R                                                                                                                                                                                                                       | 1.081 | .     | 0.0003   | 0.0005   | 0.0004   | Fam6_f_m_aM          | 0/0;0/1;0/1         |
| chr19 | 44977457 | 44977457 | C | T | CLPTM1  | exonic | nonsynonymous SNV | CLPTM1:NM_001282175:exon5:c.C541T;p.R181W;CLPTM1:NM_001282176:exon5:c.C277T;p.R93W;CLPTM1:NM_001294:exon5:c.C583T;p.R195W                                                                                                                                                                          | 1.708 | .     | .        | 1.12E-05 | .        | Fam114_f_m_aM        | 0/1;0/0;0/1         |
| chr19 | 44990451 | 44990451 | T | G | CLPTM1  | exonic | nonsynonymous SNV | CLPTM1:NM_001282175:exon10:c.T1147G;p.F383V;CLPTM1:NM_001282176:exon10:c.T883G;p.F295V;CLPTM1:NM_01294:exon10:c.T1189G;p.F397V                                                                                                                                                                     | 1.157 | .     | 0.0006   | 0.0007   | 0.0003   | Fam16_f_m_aM_aM      | 0/0;0/1;0/1;0/1     |
| chr19 | 44992641 | 44992641 | G | A | CLPTM1  | exonic | nonsynonymous SNV | CLPTM1:NM_001282175:exon14:c.G1712A;p.R571Q;CLPTM1:NM_001282176:exon14:c.G1448A;p.R483Q;CLPTM1:NM_001294:exon14:c.G1754A;p.R585Q                                                                                                                                                                   | 1.9   | .     | 7.35E-05 | 1.13E-05 | .        | Fam16_f_m_aM_aM      | 0/0;0/1;0/1;0/1     |
| chr19 | 45071876 | 45071876 | C | T | ZNF296  | exonic | nonsynonymous SNV | ZNF296:NM_145288:exon3:c.G1153A;p.G385R                                                                                                                                                                                                                                                            | 1.645 | .     | 7.35E-05 | 0.001    | 5.58E-05 | Fam84_f_m_aF         | 0/0;0/1;0/1         |
| chr19 | 45152615 | 45152615 | G | A | NKPD1   | exonic | nonsynonymous SNV | NKPD1:NM_198478:exon4:c.C1822T;p.R608C                                                                                                                                                                                                                                                             | 1.76  | .     | .        | 1.35E-05 | .        | Fam120_f_m_aM_aM     | 0/0;0/1;0/1;0/1     |
| chr19 | 45712213 | 45712213 | G | A | FBXO46  | exonic | nonsynonymous SNV | FBXO46:NM_001080469:exon2:c.C1283T;p.P428L;FBXO46:NM_001329632:exon2:c.C1283T;p.P428L;FBXO46:NM_001329633:exon2:c.C1283T;p.P428L;FBXO46:NM_001329634:exon2:c.C1283T;p.P428L                                                                                                                        | 1.689 | .     | 0.0009   | 0.0007   | 0.0002   | Fam11_f_m_aM_uM      | 0/1;0/0;0/1;0/1     |
| chr19 | 45712819 | 45712819 | C | G | FBXO46  | exonic | nonsynonymous SNV | FBXO46:NM_001080469:exon2:c.G677C;p.R226P;FBXO46:NM_001329632:exon2:c.G677C;p.R226P;FBXO46:NM_001329633:exon2:c.G677C;p.R226P;FBXO46:NM_001329634:exon2:c.G677C;p.R226P                                                                                                                            | 2.004 | .     | .        | 6.75E-05 | 6.98E-06 | Fam52_f_m_aM         | 0/1;0/0;0/1         |
| chr19 | 45768654 | 45768654 | G | A | SIX5    | exonic | nonsynonymous SNV | SIX5:NM_175875:exon1:c.C191T;p.P64L                                                                                                                                                                                                                                                                | 1.822 | .     | .        | .        | 1.44E-05 | Fam7_f_m_aM_aM_uM    | 0/0;0/1;0/0;0/1;0/1 |
| chr19 | 45771642 | 45771642 | C | T | DMPK    | exonic | nonsynonymous SNV | DMPK:NM_001288765:exon10:c.G1259A;p.R420Q;DMPK:NM_001081563:exon11:c.G1556A;p.R519Q;DMPK:NM_001081560:exon12:c.G1511A;p.R504Q;DMPK:NM_001081562:exon12:c.G1511A;p.R504Q;DMPK:NM_001288766:exon12:c.G1511A;p.R504Q;DMPK:NM_004409:exon12:c.G1526A;p.R509Q;DMPK:NM_001288764:exon13:c.G1604A;p.R535Q | 1.061 | .     | .        | .        | 6.98E-06 | Fam115_f_m_aF_aM_aF  | 0/0;0/1;0/0;0/1;0/1 |
| chr19 | 46723174 | 46723174 | G | A | STRN4   | exonic | nonsynonymous SNV | STRN4:NM_001039877:exon13:c.C1726T;p.R576C;STRN4:NM_013403:exon13:c.C1705T;p.R569C                                                                                                                                                                                                                 | 1.469 | .     | .        | 0.0004   | 1.40E-05 | Fam113_f_m_aF_raM_uF | 0/0;0/0;0/0;0/1;0/0 |
| chr19 | 47046013 | 47046013 | C | T | TMEM160 | exonic | nonsynonymous SNV | TMEM160:NM_017854:exon3:c.G541A;p.E181K                                                                                                                                                                                                                                                            | 1.321 | .     | .        | .        | .        | Fam57_f_m_aM_uF      | 0/0;0/1;0/1;0/1     |
| chr19 | 47209207 | 47209207 | G | A | SAE1    | exonic | stopgain          | SAE1:NM_001145713:exon7:c.G782A;p.W261X                                                                                                                                                                                                                                                            | 0.491 | 0.753 | .        | 6.56E-05 | .        | Fam31_f_m_aM_uF      | 0/0;0/1;0/1;0/1     |
| chr19 | 48136106 | 48136106 | G | A | LIG1    | exonic | nonsynonymous SNV | LIG1:NM_001289064:exon13:c.C1147T;p.R383C;LIG1:NM_001289063:exon14:c.C1258T;p.R420C;LIG1:NM_001320971:exon14:c.C1261T;p.R421C;LIG1:NM_000234:exon15:c.C1351T;p.R451C;LIG1:NM_001320970:exon15:c.C1348T;p.R450C                                                                                     | 1.129 | .     | .        | 1.73E-05 | 3.49E-05 | Fam15_f_m_aM_aM      | 0/0;0/1;0/0;0/1     |
| chr19 | 48462371 | 48462371 | T | G | KCNJ14  | exonic | nonsynonymous SNV | KCNJ14:NM_013348:exon2:c.T647G;p.M216R                                                                                                                                                                                                                                                             | 2.676 | .     | .        | .        | .        | Fam57_f_m_aM_uF      | 0/0;0/1;0/1;0/1     |
| chr19 | 48610846 | 48610846 | A | G | FAM83E  | exonic | nonsynonymous SNV | FAM83E:NM_017708:exon2:c.T467C;p.L156P                                                                                                                                                                                                                                                             | 1.124 | .     | .        | .        | .        | Fam26_f_m_aM_uM      | 0/1;0/0;0/1;0/0     |
| chr19 | 48635666 | 48635666 | C | T | DBP     | exonic | nonsynonymous SNV | DBP:NM_001352:exon2:c.G464A;p.G155D                                                                                                                                                                                                                                                                | 1.105 | .     | 0.0001   | .        | 0.0001   | Fam69_f_m_aM         | 0/1;0/0;0/1         |
| chr19 | 48645617 | 48645617 | G | A | CA11    | exonic | nonsynonymous SNV | CA11:NM_001217:exon1:c.C16T;p.R6C                                                                                                                                                                                                                                                                  | 1.957 | .     | .        | 0.0004   | 7.00E-06 | Fam91_m_aM_dM_aM_dM  | 0/0;0/0;0/1;0/1;0/0 |
| chr19 | 48729502 | 48729502 | T | C | RASIP1  | exonic | nonsynonymous SNV | RASIP1:NM_017805:exon5:c.A1268G;p.Y423C                                                                                                                                                                                                                                                            | 1.722 | .     | .        | 0.0002   | 4.19E-05 | Fam15_f_m_aM_aM      | 0/0;0/1;0/1;0/0     |
| chr19 | 48739362 | 48739362 | C | T | RASIP1  | exonic | nonsynonymous SNV | RASIP1:NM_017805:exon3:c.G421A;p.A141T                                                                                                                                                                                                                                                             | 1.461 | .     | .        | .        | .        | Fam43_f_m_aM         | 0/0;0/1;0/1         |
| chr19 | 48745804 | 48745804 | G | T | IZUMO1  | exonic | nonsynonymous SNV | IZUMO1:NM_182575:exon2:c.C56A;p.A19D                                                                                                                                                                                                                                                               | 1.324 | .     | .        | .        | .        | Fam71_f_m_aF         | 0/1;0/0;0/1         |

|       |          |          |   |   |          |        |                   |                                                                                                                                                                                                                                                                                                                                                                                                                                                                                                                                                                                                                                                                                              |       |        |          |          |                      |                     |
|-------|----------|----------|---|---|----------|--------|-------------------|----------------------------------------------------------------------------------------------------------------------------------------------------------------------------------------------------------------------------------------------------------------------------------------------------------------------------------------------------------------------------------------------------------------------------------------------------------------------------------------------------------------------------------------------------------------------------------------------------------------------------------------------------------------------------------------------|-------|--------|----------|----------|----------------------|---------------------|
| chr19 | 48799726 | 48799726 | G | C | BCAT2    | exonic | nonsynonymous SNV | BCAT2:NM_001164773:exon4:c.C368G;p.P123R,BCAT2:NM_001190:exon6:c.C644G;p.P215R,BCAT2:NM_001284325:exon7:c.C524G;p.P175R                                                                                                                                                                                                                                                                                                                                                                                                                                                                                                                                                                      | 1.263 | 0.0003 | 0.0003   | 0.0003   | Fam74_f_m_aM_uM      | 0/1;0/0;0/1;0/1     |
| chr19 | 48806597 | 48806597 | C | T | BCAT2    | exonic | nonsynonymous SNV | BCAT2:NM_001190:exon3:c.G220A;p.G745,BCAT2:NM_001284325:exon4:c.G100A;p.G345                                                                                                                                                                                                                                                                                                                                                                                                                                                                                                                                                                                                                 | 1.184 | 0.0001 | 0.0007   | 0.0002   | Fam80_f_m_aM_uM      | 0/1;0/0;0/1;0/0     |
| chr19 | 48985862 | 48985862 | G | C | GYS1     | exonic | nonsynonymous SNV | GYS1:NM_001161587:exon3:c.C474G;p.N158K,GYS1:NM_002103:exon4:c.C666G;p.N222K                                                                                                                                                                                                                                                                                                                                                                                                                                                                                                                                                                                                                 | 1.474 | 0.0007 | 0.0007   | 0.0004   | Fam90_f_m_aF_dM      | 0/0;0/1;0/1;0/0     |
| chr19 | 48985888 | 48985888 | A | G | GYS1     | exonic | nonsynonymous SNV | GYS1:NM_001161587:exon3:c.T448C;p.C150R,GYS1:NM_002103:exon4:c.T640C;p.C214R                                                                                                                                                                                                                                                                                                                                                                                                                                                                                                                                                                                                                 | 1.857 |        |          |          | Fam27_f_m_aF_uM_uM   | 0/0;0/1;0/1;0/0;0/1 |
| chr19 | 49086537 | 49086537 | T | G | SNRNP70  | exonic | nonsynonymous SNV | SNRNP70:NM_001301069:exon2:c.T123G;p.I41M,SNRNP70:NM_003089:exon2:c.T123G;p.I41M                                                                                                                                                                                                                                                                                                                                                                                                                                                                                                                                                                                                             | 2.248 |        |          |          | Fam30_f_m_aM_uM      | 0/0;0/1;0/1;0/0     |
| chr19 | 49128018 | 49128018 | G | T | PPFIA3   | exonic | nonsynonymous SNV | PPFIA3:NM_003660:exon2:c.G145T;p.A49S                                                                                                                                                                                                                                                                                                                                                                                                                                                                                                                                                                                                                                                        | 1.475 |        |          |          | Fam33_f_m_aM_uM      | 0/0;0/1;0/1;0/1     |
| chr19 | 49157889 | 49157889 | A | C | TRPM4    | exonic | nonsynonymous SNV | TRPM4:NM_001195227:exon1:c.A23C;p.Q8P,TRPM4:NM_001321281:exon1:c.A23C;p.Q8P,TRPM4:NM_017636:exon1:c.A23C;p.Q8P                                                                                                                                                                                                                                                                                                                                                                                                                                                                                                                                                                               | 1.084 |        |          |          | Fam79_f_m_aM_uM      | 0/0;0/1;0/1;0/0     |
| chr19 | 49167957 | 49167957 | A | G | TRPM4    | exonic | nonsynonymous SNV | TRPM4:NM_001195227:exon4:c.A308G;p.Y103C,TRPM4:NM_017636:exon4:c.A308G;p.Y103C                                                                                                                                                                                                                                                                                                                                                                                                                                                                                                                                                                                                               | 1.099 | 0.001  | 0.0006   | 0.0004   | Fam32_f_m_aM_uM      | 0/1;0/0;0/1;0/0     |
| chr19 | 49172108 | 49172108 | G | C | TRPM4    | exonic | nonsynonymous SNV | TRPM4:NM_001321283:exon7:c.G628C;p.A210P,TRPM4:NM_001195227:exon9:c.G1150C;p.A384P,TRPM4:NM_017636:exon9:c.G1150C;p.A384P                                                                                                                                                                                                                                                                                                                                                                                                                                                                                                                                                                    | 1.073 |        | 0.0004   |          | Fam116_f_m_aM_aF     | 0/0;0/1;0/0;0/1     |
| chr19 | 49210301 | 49210301 | T | C | TRPM4    | exonic | nonsynonymous SNV | TRPM4:NM_001321285:exon16:c.T2162C;p.L721P,TRPM4:NM_001321281:exon19:c.T2879C;p.L960P,TRPM4:NM_001321283:exon19:c.T2702C;p.L901P,TRPM4:NM_001195227:exon20:c.T2789C;p.L930P,TRPM4:NM_001321282:exon20:c.T1616C;p.L539P,TRPM4:NM_017636:exon21:c.T3224C;p.L1075P                                                                                                                                                                                                                                                                                                                                                                                                                              | 1.089 | 0.0008 | 0.0001   | 0.0002   | Fam59_f_m_aF_uM      | 0/1;0/0;0/1;0/0     |
| chr19 | 49447053 | 49447053 | G | A | PIH1D1   | exonic | nonsynonymous SNV | PIH1D1:NM_017916:exon7:c.C658T;p.L220F                                                                                                                                                                                                                                                                                                                                                                                                                                                                                                                                                                                                                                                       | 1.329 |        |          |          | Fam49_f_m_aM         | 0/1;0/0;0/1         |
| chr19 | 49490262 | 49490262 | G | A | RPL13A   | exonic | nonsynonymous SNV | RPL13A:NM_012423:exon3:c.G119A;p.G40D                                                                                                                                                                                                                                                                                                                                                                                                                                                                                                                                                                                                                                                        | 1.025 | 0.0006 | 0.0005   | 0.0002   | Fam85_f_m_aM_aM      | 0/0;0/1;0/0;0/1     |
| chr19 | 49534365 | 49534365 | C | T | RCN3     | exonic | nonsynonymous SNV | RCN3:NM_020650:exon3:c.C415T;p.R139C                                                                                                                                                                                                                                                                                                                                                                                                                                                                                                                                                                                                                                                         | 1.939 |        | 4.60E-05 | 1.40E-05 | Fam118_f_m_aM_aF_uM  | 0/1;0/0;0/1;0/1;0/1 |
| chr19 | 49595846 | 49595846 | G | C | PRR12    | exonic | nonsynonymous SNV | PRR12:NM_020719:exon4:c.G1511C;p.G504A                                                                                                                                                                                                                                                                                                                                                                                                                                                                                                                                                                                                                                                       | 1.23  |        | 0.0002   |          | Fam53_f_m_aM         | 0/1;0/0;0/1         |
| chr19 | 49597399 | 49597399 | G | A | PRR12    | exonic | nonsynonymous SNV | PRR12:NM_020719:exon4:c.G3064A;p.V1022I                                                                                                                                                                                                                                                                                                                                                                                                                                                                                                                                                                                                                                                      | 1.099 |        |          |          | Fam84_f_m_aF         | 0/0;0/1;0/1         |
| chr19 | 49653618 | 49653618 | C | T | SCAF1    | exonic | nonsynonymous SNV | SCAF1:NM_021228:exon7:c.C3229T;p.R1077C                                                                                                                                                                                                                                                                                                                                                                                                                                                                                                                                                                                                                                                      | 1.736 |        | 0.0006   |          | Fam10_f_m_aM_uF      | 0/0;0/1;0/1;0/1     |
| chr19 | 49654384 | 49654384 | C | G | SCAF1    | exonic | nonsynonymous SNV | SCAF1:NM_021228:exon8:c.C3352G;p.L1118V                                                                                                                                                                                                                                                                                                                                                                                                                                                                                                                                                                                                                                                      | 1.186 |        |          |          | Fam110_f_m_aM_aM_uMs | 0/0;0/1;0/0;0/1;0/0 |
| chr19 | 50625263 | 50625263 | G | A | SYT3     | exonic | nonsynonymous SNV | SYT3:NM_032298:exon7:c.C1606T;p.R536C,SYT3:NM_001160329:exon9:c.C1606T;p.R536C                                                                                                                                                                                                                                                                                                                                                                                                                                                                                                                                                                                                               | 1.534 |        |          | 6.98E-06 | Fam9_f_m_aM_dM_uF    | 0/1;0/0;0/1;0/0;0/0 |
| chr19 | 50629457 | 50629457 | G | A | SYT3     | exonic | nonsynonymous SNV | SYT3:NM_032298:exon4:c.C1118T;p.P373L,SYT3:NM_001160329:exon6:c.C1118T;p.P373L                                                                                                                                                                                                                                                                                                                                                                                                                                                                                                                                                                                                               | 1.398 |        |          |          | Fam62_f_m_aM_aM      | 0/1;0/0;0/0;0/1     |
| chr19 | 50825878 | 50825878 | C | A | KLK15    | exonic | nonsynonymous SNV | KLK15:NM_001277081:exon5:c.G686T;p.C229F,KLK15:NM_017509:exon5:c.G689T;p.C230F                                                                                                                                                                                                                                                                                                                                                                                                                                                                                                                                                                                                               | 1.521 |        |          |          | Fam16_f_m_aM_aM      | 0/0;0/1;0/1;0/1     |
| chr19 | 51965747 | 51965747 | A | G | ZNF350   | exonic | nonsynonymous SNV | ZNF350:NM_021632:exon5:c.T706C;p.C236R                                                                                                                                                                                                                                                                                                                                                                                                                                                                                                                                                                                                                                                       | 1.042 |        |          |          | Fam100_f_m_aF        | 0/0;0/1;0/1         |
| chr19 | 53577290 | 53577290 | G | A | ZNF331   | exonic | nonsynonymous SNV | ZNF331:NM_001253801:exon5:c.G730A;p.E244K,ZNF331:NM_001317113:exon5:c.G730A;p.E244K,ZNF331:NM_001317116:exon5:c.G730A;p.E244K,ZNF331:NM_001317119:exon5:c.G730A;p.E244K,ZNF331:NM_001317121:exon5:c.G730A;p.E244K,ZNF331:NM_001079906:exon6:c.G730A;p.E244K,ZNF331:NM_001079907:exon6:c.G730A;p.E244K,ZNF331:NM_001253799:exon6:c.G730A;p.E244K,ZNF331:NM_001253800:exon6:c.G730A;p.E244K,ZNF331:NM_001317114:exon6:c.G730A;p.E244K,ZNF331:NM_001317117:exon6:c.G730A;p.E244K,ZNF331:NM_001317118:exon6:c.G730A;p.E244K,ZNF331:NM_001253798:exon7:c.G730A;p.E244K,ZNF331:NM_001317115:exon7:c.G730A;p.E244K,ZNF331:NM_001317120:exon7:c.G730A;p.E244K,ZNF331:NM_018555:exon7:c.G730A;p.E244K | 1.691 | 0.0002 | 0.0001   | 0.0001   | Fam1_f_m_aM          | 0/1;0/0;0/1         |
| chr19 | 53914515 | 53914515 | G | A | CACNG7   | exonic | nonsynonymous SNV | CACNG7:NM_031896:exon2:c.G212A;p.R71H                                                                                                                                                                                                                                                                                                                                                                                                                                                                                                                                                                                                                                                        | 1.027 |        | 7.45E-05 | 6.98E-06 | Fam123_f_aF          | 0/1;0/1             |
| chr19 | 54096050 | 54096050 | G | C | OSCAR    | exonic | nonsynonymous SNV | OSCAR:NM_001282350:exon4:c.C444G;p.F148L,OSCAR:NM_133168:exon4:c.C444G;p.F148L,OSCAR:NM_001282349:exon5:c.C477G;p.F159L,OSCAR:NM_133169:exon5:c.C477G;p.F159L,OSCAR:NM_130771:exon6:c.C489G;p.F163L,OSCAR:NM_206818:exon6:c.C489G;p.F163L                                                                                                                                                                                                                                                                                                                                                                                                                                                    | 1.215 | 0.0006 | 0.0002   | 0.0001   | Fam36_f_m_aM_uM      | 0/1;0/0;0/1;0/0     |
| chr19 | 54118454 | 54118454 | T | A | PRPF31   | exonic | nonsynonymous SNV | PRPF31:NM_015629:exon2:c.T176A;p.M59K                                                                                                                                                                                                                                                                                                                                                                                                                                                                                                                                                                                                                                                        | 1.258 |        |          |          | Fam107_f_m_aM        | 0/1;0/0;0/1         |
| chr19 | 54121892 | 54121892 | C | T | PRPF31   | exonic | nonsynonymous SNV | PRPF31:NM_015629:exon4:c.C271T;p.R91C                                                                                                                                                                                                                                                                                                                                                                                                                                                                                                                                                                                                                                                        | 1.115 | 0.0004 | 0.0003   | 9.77E-05 | Fam15_f_m_aM_aM      | 0/0;0/1;0/1;0/0     |
| chr19 | 54192323 | 54192323 | T | G | TSEN34   | exonic | nonsynonymous SNV | TSEN34:NM_001077446:exon3:c.T695G;p.F232C,TSEN34:NM_001282332:exon4:c.T695G;p.F232C,TSEN34:NM_001282333:exon4:c.T704G;p.F235C,TSEN34:NM_024075:exon4:c.T695G;p.F232C                                                                                                                                                                                                                                                                                                                                                                                                                                                                                                                         | 1.195 |        |          |          | Fam91_m_aM_dM_aM_dM  | 0/0;0/1;0/1;0/0;0/1 |
| chr19 | 55096117 | 55096117 | G | A | PPP1R12C | exonic | nonsynonymous SNV | PPP1R12C:NM_001271618:exon8:c.C1087T;p.R363C,PPP1R12C:NM_017607:exon8:c.C1087T;p.R363C                                                                                                                                                                                                                                                                                                                                                                                                                                                                                                                                                                                                       | 1.287 |        | 0.0001   | 4.19E-05 | Fam72_f_m_aF_uF      | 0/1;0/0;0/1;0/0     |
| chr19 | 55289548 | 55289548 | C | T | BRSK1    | exonic | nonsynonymous SNV | BRSK1:NM_032430:exon4:c.C386T;p.T129M                                                                                                                                                                                                                                                                                                                                                                                                                                                                                                                                                                                                                                                        | 2.715 |        | 0.0001   | 2.79E-05 | Fam16_f_m_aM_aM      | 0/0;0/1;0/1;0/0     |
| chr19 | 55354461 | 55354461 | C | A | COX6B2   | exonic | nonsynonymous SNV | COX6B2:NM_001369798:exon2:c.C61T;p.P21S,COX6B2:NM_001369799:exon2:c.C61T;p.P21S,COX6B2:NM_001369800:exon2:c.C61T;p.P21S,COX6B2:NM_144613:exon2:c.C61T;p.P21S                                                                                                                                                                                                                                                                                                                                                                                                                                                                                                                                 | 1.1   |        |          | 6.98E-06 | Fam14_f_m_aM_aM      | 0/1;0/0;0/1;0/0     |

|       |          |          |   |   |         |        |                   |                                                                                                                                                                                                                                                                                                                                                                                                                      |       |          |          |          |                      |                     |
|-------|----------|----------|---|---|---------|--------|-------------------|----------------------------------------------------------------------------------------------------------------------------------------------------------------------------------------------------------------------------------------------------------------------------------------------------------------------------------------------------------------------------------------------------------------------|-------|----------|----------|----------|----------------------|---------------------|
| chr19 | 55376993 | 55376993 | G | A | TMEM190 | exonic | nonsynonymous SNV | TMEM190:NM_139172:exon2:c.G61A:p.G21R                                                                                                                                                                                                                                                                                                                                                                                | 1.412 | 0.0003   | 0.0004   | 0.0002   | Fam2_f_m_aF          | 0/0/0/1/0/1         |
| chr19 | 55377616 | 55377616 | C | T | TMEM190 | exonic | nonsynonymous SNV | TMEM190:NM_139172:exon3:c.C118T:p.R40W                                                                                                                                                                                                                                                                                                                                                                               | 1.16  | .        | 3.29E-05 | 1.40E-05 | Fam101_f_m_aM        | 0/1/0/0/0/1         |
| chr19 | 55486586 | 55486586 | G | C | NAT14   | exonic | nonsynonymous SNV | NAT14:NM_020378:exon3:c.G251C:p.R84P                                                                                                                                                                                                                                                                                                                                                                                 | 1.143 | 0.0002   | 0.0001   | 7.68E-05 | Fam92_f_m_aM_raM     | 0/1/0/0/0/1/0/1     |
| chr19 | 55530214 | 55530214 | A | G | SBK2    | exonic | nonsynonymous SNV | SBK2:NM_001370096:exon4:c.T566C:p.V189A                                                                                                                                                                                                                                                                                                                                                                              | 2.302 | .        | 2.53E-05 | 6.98E-06 | Fam6_f_m_aM          | 0/1/0/0/0/1         |
| chr19 | 56146960 | 56146960 | G | A | ZNF444  | exonic | nonsynonymous SNV | ZNF444:NM_001253792:exon3:c.G49A:p.D17N,ZNF444:NM_018337:exon3:c.G49A:p.D17N                                                                                                                                                                                                                                                                                                                                         | 1.858 | .        | .        | .        | Fam9_f_m_aM_dM_uF    | 0/1/0/0/0/1/0/1/0/0 |
| chr19 | 56159930 | 56159930 | C | G | ZNF444  | exonic | nonsynonymous SNV | ZNF444:NM_001253792:exon5:c.C710G:p.P237R,ZNF444:NM_018337:exon5:c.C713G:p.P238R                                                                                                                                                                                                                                                                                                                                     | 1.748 | .        | .        | .        | Fam51_f_m_aM_uF      | 0/1/0/0/0/1/0/0     |
| chr19 | 58356914 | 58356914 | G | A | ZNF497  | exonic | nonsynonymous SNV | ZNF497:NM_001207009:exon2:c.C722T:p.T241M,ZNF497:NM_198458:exon3:c.C722T:p.T241M                                                                                                                                                                                                                                                                                                                                     | 1.078 | .        | 2.57E-05 | 7.00E-06 | Fam6_f_m_aM          | 0/1/0/0/0/1         |
| chr19 | 58357131 | 58357131 | T | C | ZNF497  | exonic | nonsynonymous SNV | ZNF497:NM_001207009:exon2:c.A505G:p.K169E,ZNF497:NM_198458:exon3:c.A505G:p.K169E                                                                                                                                                                                                                                                                                                                                     | 1.205 | 0.0004   | 0.0004   | 0.0003   | Fam10_f_m_aM_uF      | 0/1/0/0/0/1/0/1     |
| chr19 | 58470901 | 58470901 | A | C | ZNF324  | exonic | nonsynonymous SNV | ZNF324:NM_014347:exon4:c.A409C:p.T137P                                                                                                                                                                                                                                                                                                                                                                               | 1.8   | .        | .        | .        | Fam19_f_m_aM         | 0/0/0/1/0/1         |
| chr2  | 45460    | 45460    | T | C | FAM110C | exonic | nonsynonymous SNV | FAM110C:NM_001077710:exon1:c.A926G:p.Q309R                                                                                                                                                                                                                                                                                                                                                                           | 1.088 | .        | .        | 6.98E-06 | Fam114_f_m_aM        | 0/1/0/0/0/1         |
| chr2  | 1648445  | 1648445  | C | T | PXDN    | exonic | nonsynonymous SNV | PXDN:NM_012293:exon17:c.G3335A:p.G1112D                                                                                                                                                                                                                                                                                                                                                                              | 1.388 | .        | .        | .        | Fam70_f_m_aM         | 0/0/0/1/0/1         |
| chr2  | 3194030  | 3194030  | G | T | EIPR1   | exonic | nonsynonymous SNV | EIPR1:NM_001330531:exon6:c.C358A:p.P120T,EIPR1:NM_003310:exon7:c.C790A:p.P264T,EIPR1:NM_001330530:exon8:c.C871A:p.P291T                                                                                                                                                                                                                                                                                              | 1.409 | 0.0002   | 0.0003   | 8.38E-05 | Fam18_f_m_aM_uF      | 0/0/0/1/0/1/0/1     |
| chr2  | 5693118  | 5693118  | A | G | SOX11   | exonic | nonsynonymous SNV | SOX11:NM_003108:exon1:c.A397G:p.S133G                                                                                                                                                                                                                                                                                                                                                                                | 1.025 | .        | .        | 6.98E-06 | Fam113_f_m_aF_raM_uF | 0/0/0/0/0/0/1/0/0   |
| chr2  | 9961240  | 9961240  | A | G | GRHL1   | exonic | nonsynonymous SNV | GRHL1:NM_198182:exon4:c.A473G:p.K158R                                                                                                                                                                                                                                                                                                                                                                                | 1.041 | .        | 3.27E-05 | .        | Fam47_f_m_aM         | 0/0/0/1/0/1         |
| chr2  | 10419935 | 10419935 | G | A | HPCAL1  | exonic | nonsynonymous SNV | HPCAL1:NM_001258357:exon3:c.G178A:p.D60N,HPCAL1:NM_001258358:exon3:c.G178A:p.D60N,HPCAL1:NM_001258359:exon3:c.G178A:p.D60N,HPCAL1:NM_002149:exon3:c.G178A:p.D60N,HPCAL1:NM_134421:exon4:c.G178A:p.D60N                                                                                                                                                                                                               | 1.945 | .        | .        | .        | Fam98_f_m_aM         | 0/1/0/0/0/1         |
| chr2  | 10913776 | 10913776 | C | A | KCNF1   | exonic | nonsynonymous SNV | KCNF1:NM_002236:exon1:c.C1350A:p.D450E                                                                                                                                                                                                                                                                                                                                                                               | 1.053 | .        | .        | .        | Fam42_f_m_aM_uF      | 0/1/0/0/0/1/0/1     |
| chr2  | 11207781 | 11207781 | T | C | ROCK2   | exonic | nonsynonymous SNV | ROCK2:NM_001321643:exon20:c.A2236G:p.N746D,ROCK2:NM_004850:exon20:c.A2494G:p.N832D                                                                                                                                                                                                                                                                                                                                   | 1.692 | 7.35E-05 | 3.37E-05 | 6.98E-06 | Fam7_f_m_aM_aM_uM    | 0/0/0/1/0/1/0/0/0/1 |
| chr2  | 11588812 | 11588812 | C | T | GREB1   | exonic | nonsynonymous SNV | GREB1:NM_014668:exon10:c.C1226T:p.T409M,GREB1:NM_033090:exon10:c.C1226T:p.T409M                                                                                                                                                                                                                                                                                                                                      | 1.072 | .        | 0.0002   | 0.0002   | Fam10_f_m_aM_uF      | 0/1/0/0/0/1/0/1     |
| chr2  | 11588827 | 11588827 | C | T | GREB1   | exonic | nonsynonymous SNV | GREB1:NM_014668:exon10:c.C1241T:p.S414F,GREB1:NM_033090:exon10:c.C1241T:p.S414F                                                                                                                                                                                                                                                                                                                                      | 1.213 | .        | 6.17E-05 | 6.98E-06 | Fam98_f_m_aM         | 0/1/0/0/0/1         |
| chr2  | 14634613 | 14634613 | T | C | LRATD1  | exonic | nonsynonymous SNV | LRATD1:NM_145175:exon2:c.T634C:p.S212P,LRATD1:NM_001369364:exon3:c.T634C:p.S212P                                                                                                                                                                                                                                                                                                                                     | 1.518 | .        | .        | .        | Fam87_f_m_aM_uM      | 0/0/0/1/0/1/0/1     |
| chr2  | 15618263 | 15618263 | G | C | DDX1    | exonic | nonsynonymous SNV | DDX1:NM_004939:exon16:c.G1199C:p.R400T                                                                                                                                                                                                                                                                                                                                                                               | 1.139 | 0.0003   | 0.0001   | 7.68E-05 | Fam92_f_m_aM_raM     | 0/0/0/0/0/0/0/1     |
| chr2  | 20278672 | 20278672 | C | A | PUM2    | exonic | nonsynonymous SNV | PUM2:NM_001282752:exon12:c.G1700T:p.G567V,PUM2:NM_001352930:exon12:c.G1190T:p.G397V,PUM2:NM_001352917:exon13:c.G1868T:p.G623V,PUM2:NM_001352918:exon13:c.G1868T:p.G623V,PUM2:NM_001352919:exon13:c.G1868T:p.G623V,PUM2:NM_015317:exon13:c.G1868T:p.G623V                                                                                                                                                             | 1.323 | .        | 0.0002   | 3.50E-05 | Fam80_f_m_aM_uM      | 0/0/0/1/0/1/0/1     |
| chr2  | 21006966 | 21006966 | G | C | APOB    | exonic | stopgain          | APOB:NM_000384:exon26:c.C9902G:p.S3301X                                                                                                                                                                                                                                                                                                                                                                              | 0.537 | .        | .        | .        | Fam47_f_m_aM         | 0/1/0/0/0/1         |
| chr2  | 24826055 | 24826055 | A | T | ADCY3   | exonic | nonsynonymous SNV | ADCY3:NM_001320613:exon16:c.T2570A:p.F857Y,ADCY3:NM_004036:exon16:c.T2567A:p.F856Y                                                                                                                                                                                                                                                                                                                                   | 1.017 | 0.0006   | 0.0004   | 2.10E-05 | Fam95_f_m_aM_aM_uF   | 0/0/0/1/0/1/0/1/0/1 |
| chr2  | 27222298 | 27222298 | C | G | CAD     | exonic | nonsynonymous SNV | CAD:NM_001306079:exon4:c.C457G:p.P153A,CAD:NM_004341:exon4:c.C457G:p.P153A                                                                                                                                                                                                                                                                                                                                           | 1.054 | .        | .        | .        | Fam86_f_m_aF         | 0/1/0/0/0/1         |
| chr2  | 27224842 | 27224842 | A | G | CAD     | exonic | nonsynonymous SNV | CAD:NM_001306079:exon10:c.A1352G:p.Y451C,CAD:NM_004341:exon10:c.A1352G:p.Y451C                                                                                                                                                                                                                                                                                                                                       | 1.11  | 7.35E-05 | 7.45E-05 | 1.40E-05 | Fam48_f_m_aM_uM      | 0/1/0/0/0/1/0/1     |
| chr2  | 27239119 | 27239119 | C | T | CAD     | exonic | nonsynonymous SNV | CAD:NM_001306079:exon31:c.C4951T:p.L1651F,CAD:NM_004341:exon32:c.C5140T:p.L1714F                                                                                                                                                                                                                                                                                                                                     | 1.227 | .        | 8.98E-05 | 4.88E-05 | Fam38_f_m_aM         | 0/0/0/1/0/1         |
| chr2  | 27239430 | 27239430 | C | T | CAD     | exonic | nonsynonymous SNV | CAD:NM_001306079:exon32:c.C5164T:p.R1722C,CAD:NM_004341:exon33:c.C5353T:p.R1785C                                                                                                                                                                                                                                                                                                                                     | 1.566 | .        | 2.24E-05 | 1.40E-05 | Fam113_f_m_aF_raM_uF | 0/0/0/1/0/1/0/0/0/1 |
| chr2  | 27364775 | 27364775 | C | T | EIF2B4  | exonic | nonsynonymous SNV | EIF2B4:NM_001318965:exon11:c.G1378A:p.E460K,EIF2B4:NM_001318968:exon11:c.G730A:p.E244K,EIF2B4:NM_172195:exon11:c.G1375A:p.E459K,EIF2B4:NM_001034116:exon12:c.G1315A:p.E439K,EIF2B4:NM_001318966:exon12:c.G1270A:p.E424K,EIF2B4:NM_001318967:exon12:c.G1222A:p.E408K,EIF2B4:NM_001318969:exon12:c.G697A:p.E233K,EIF2B4:NM_015636:exon12:c.G1312A:p.E438K                                                              | 1.192 | .        | .        | .        | Fam113_f_m_aF_raM_uF | 0/1/0/0/0/1/0/1/0/1 |
| chr2  | 27621162 | 27621162 | G | A | ZNF512  | exonic | nonsynonymous SNV | ZNF512:NM_001271286:exon13:c.G1318A:p.V440I,ZNF512:NM_001271287:exon13:c.G1174A:p.V392I,ZNF512:NM_01271288:exon13:c.G1174A:p.V392I,ZNF512:NM_001271289:exon13:c.G1090A:p.V364I,ZNF512:NM_032434:exon14:c.G1405A:p.V469I,ZNF512:NM_001271318:exon15:c.G1174A:p.V392I                                                                                                                                                  | 1.307 | 0.0002   | 0.0003   | 0.0002   | Fam122_f_m_aM        | 0/0/0/1/0/1         |
| chr2  | 28025316 | 28025316 | C | T | BABAM2  | exonic | nonsynonymous SNV | BABAM2:NM_001261840:exon5:c.C391T:p.R131C,BABAM2:NM_001329112:exon5:c.C391T:p.R131C,BABAM2:NM_001329114:exon5:c.C391T:p.R131C,BABAM2:NM_004899:exon5:c.C391T:p.R131C,BABAM2:NM_199191:exon5:c.C391T:p.R131C,BABAM2:NM_199192:exon5:c.C391T:p.R131C,BABAM2:NM_001329113:exon6:c.C391T:p.R131C,BABAM2:NM_001329115:exon6:c.C391T:p.R131C,BABAM2:NM_199193:exon6:c.C391T:p.R131C,BABAM2:NM_199194:exon6:c.C391T:p.R131C | 1.321 | 0.0003   | 1.12E-05 | 1.40E-05 | Fam52_f_m_aM         | 0/0/0/1/0/1         |
| chr2  | 31266441 | 31266441 | G | A | EHD3    | exonic | nonsynonymous SNV | EHD3:NM_014600:exon6:c.G1345A:p.D449N                                                                                                                                                                                                                                                                                                                                                                                | 1.171 | 0.0001   | 0.0002   | 0.0001   | Fam51_f_m_aM_uF      | 0/0/0/1/0/1/0/0     |

|      |          |          |   |   |           |        |                   |                                                                                                                                                                                                                                                                                                                                                                                                                                                                                                                                                                                                                                                                                                                                                                                                                                                                     |       |          |          |                          |                     |
|------|----------|----------|---|---|-----------|--------|-------------------|---------------------------------------------------------------------------------------------------------------------------------------------------------------------------------------------------------------------------------------------------------------------------------------------------------------------------------------------------------------------------------------------------------------------------------------------------------------------------------------------------------------------------------------------------------------------------------------------------------------------------------------------------------------------------------------------------------------------------------------------------------------------------------------------------------------------------------------------------------------------|-------|----------|----------|--------------------------|---------------------|
| chr2 | 32039314 | 32039314 | G | A | DPY30     | exonic | nonsynonymous SNV | DPY30:NM_001321209:exon3:c.C49T;p.P175,DPY30:NM_01321210:exon3:c.C49T;p.P175,DPY30:NM_032574:exon3:c.C49T;p.P175                                                                                                                                                                                                                                                                                                                                                                                                                                                                                                                                                                                                                                                                                                                                                    | 1.928 |          |          | Fam117_f_m_aM_aF         | 0/1;0/0;0/1;0/0     |
| chr2 | 37060632 | 37060632 | C | T | HEATR5B   | exonic | nonsynonymous SNV | HEATR5B:NM_019024:exon12:c.G1798A;p.D600N                                                                                                                                                                                                                                                                                                                                                                                                                                                                                                                                                                                                                                                                                                                                                                                                                           | 1.058 |          | 2.23E-05 | Fam84_f_m_aF             | 0/0;0/1;0/1         |
| chr2 | 37064747 | 37064747 | T | A | HEATR5B   | exonic | nonsynonymous SNV | HEATR5B:NM_019024:exon10:c.A1577T;p.K526I                                                                                                                                                                                                                                                                                                                                                                                                                                                                                                                                                                                                                                                                                                                                                                                                                           | 1.116 | 0.0003   | 8.94E-05 | 3.49E-05 Fam98_f_m_aM    | 0/1;0/0;0/1         |
| chr2 | 39006475 | 39006475 | C | G | SOS1      | exonic | nonsynonymous SNV | SOS1:NM_005633:exon17:c.G2728C;p.D910H                                                                                                                                                                                                                                                                                                                                                                                                                                                                                                                                                                                                                                                                                                                                                                                                                              | 1.667 |          | 9.81E-05 | 1.40E-05 Fam53_f_m_aM    | 0/1;0/0;0/1         |
| chr2 | 39051253 | 39051253 | A | G | SOS1      | exonic | nonsynonymous SNV | SOS1:NM_005633:exon6:c.T755C;p.I252T                                                                                                                                                                                                                                                                                                                                                                                                                                                                                                                                                                                                                                                                                                                                                                                                                                | 1.497 |          | 0.0003   | 2.79E-05 Fam94_f_m_aM    | 0/0;0/1;0/1         |
| chr2 | 43225113 | 43225113 | C | T | ZFP36L2   | exonic | nonsynonymous SNV | ZFP36L2:NM_006887:exon2:c.G691A;p.G231R                                                                                                                                                                                                                                                                                                                                                                                                                                                                                                                                                                                                                                                                                                                                                                                                                             | 1.251 |          |          | 6.98E-06 Fam14_f_m_aM_aM | 0/1;0/0;0/1;0/0     |
| chr2 | 50091394 | 50091394 | C | T | NRXN1     | exonic | nonsynonymous SNV | NRXN1:NM_001330091:exon3:c.G542A;p.R181H, NRXN1:NM_001330092:exon3:c.G542A;p.R181H, NRXN1:NM_001330097:exon3:c.G542A;p.R181H, NRXN1:NM_138735:exon3:c.G542A;p.R181H, NRXN1:NM_001330087:exon14:c.G3536A:p.R1179H, NRXN1:NM_001330096:exon14:c.G3536A:p.R1179H, NRXN1:NM_001330083:exon15:c.G3581A;p.R1194H, NRXN1:NM_001330084:exon15:c.G3581A;p.R1194H, NRXN1:NM_001330088:exon15:c.G3566A;p.R1189H, NRXN1:NM_001330095:exon17:c.G3596A;p.R1199H, NRXN1:NM_001330077:exon18:c.G3623A;p.R1208H, NRXN1:NM_001330082:exon18:c.G3623A;p.R1208H, NRXN1:NM_001330085:exon18:c.G3620A;p.R1207H, NRXN1:NM_001330094:exon18:c.G3635A;p.R1212H, NRXN1:NM_001330078:exon19:c.G3647A:p.R1216H, NRXN1:NM_001330086:exon19:c.G3647A:p.R1216H, NRXN1:NM_001330093:exon19:c.G3644A;p.R1215H, NRXN1:NM_004801:exon19:c.G3647A;p.R1216H, NRXN1:NM_001135659:exon20:c.G3767A;p.R1256H | 2.007 |          | 2.23E-05 | Fam57_f_m_aM_uF          | 0/1;0/0;0/1;0/0     |
| chr2 | 51027514 | 51027514 | C | G | NRXN1     | exonic | nonsynonymous SNV | NRXN1:NM_001135659:exon2:c.G760C;p.D254H, NRXN1:NM_001330077:exon2:c.G760C;p.D254H, NRXN1:NM_001330078:exon2:c.G760C;p.D254H, NRXN1:NM_001330079:exon2:c.G760C;p.D254H, NRXN1:NM_001330081:exon2:c.G760C;p.D254H, NRXN1:NM_001330082:exon2:c.G760C;p.D254H, NRXN1:NM_001330083:exon2:c.G760C;p.D254H, NRXN1:NM_001330084:exon2:c.G760C;p.D254H, NRXN1:NM_001330085:exon2:c.G760C;p.D254H, NRXN1:NM_001330086:exon2:c.G760C;p.D254H, NRXN1:NM_001330087:exon2:c.G760C;p.D254H, NRXN1:NM_001330088:exon2:c.G760C;p.D254H, NRXN1:NM_001330089:exon2:c.G760C;p.D254H, NRXN1:NM_001330090:exon2:c.G760C;p.D254H, NRXN1:NM_001330093:exon2:c.G760C;p.D254H, NRXN1:NM_001330094:exon2:c.G760C;p.D254H, NRXN1:NM_001330095:exon2:c.G760C;p.D254H, NRXN1:NM_001330096:exon2:c.G760C;p.D254H, NRXN1:NM_004801:exon2:c.G760C;p.D254H                                           | 1.449 |          |          | Fam20_f_m_aM_uF          | 0/1;0/0;0/1;0/0     |
| chr2 | 69172373 | 69172373 | A | - | ANTXR1    | exonic | stopgain          | ANTXR1:NM_053034:exon15:c.1096delA;p.L367*                                                                                                                                                                                                                                                                                                                                                                                                                                                                                                                                                                                                                                                                                                                                                                                                                          | 0.347 | 0.0001   | 0.0007   | 8.39E-05 Fam56_f_m_aF_aM | 0/1;0/0;0/1;0/0     |
| chr2 | 69354287 | 69354287 | G | C | GFPT1     | exonic | nonsynonymous SNV | GFPT1:NM_001244710:exon9:c.C711G;p.F237L                                                                                                                                                                                                                                                                                                                                                                                                                                                                                                                                                                                                                                                                                                                                                                                                                            | 1.316 |          | 1.25E-05 | 1.40E-05 Fam112_f_m_aM   | 0/0;0/1;0/1         |
| chr2 | 70704435 | 70704435 | G | A | ADD2      | exonic | nonsynonymous SNV | ADD2:NM_001185055:exon3:c.C256T;p.L86F, ADD2:NM_001185054:exon4:c.C208T;p.L70F, ADD2:NM_001617:exon4:c.C208T;p.L70F, ADD2:NM_017482:exon4:c.C208T;p.L70F, ADD2:NM_017488:exon4:c.C208T;p.L70F                                                                                                                                                                                                                                                                                                                                                                                                                                                                                                                                                                                                                                                                       | 1.14  |          |          | Fam88_f_m_aF             | 0/0;0/1;0/1         |
| chr2 | 70963244 | 70963244 | G | A | ATP6V1B1  | exonic | nonsynonymous SNV | ATP6V1B1:NM_001692:exon10:c.G992A;p.R331Q                                                                                                                                                                                                                                                                                                                                                                                                                                                                                                                                                                                                                                                                                                                                                                                                                           | 1.105 | 0.0003   | 0.0003   | 4.89E-05 Fam53_f_m_aM    | 0/0;0/1;0/1         |
| chr2 | 72135278 | 72135278 | G | A | CYP26B1   | exonic | nonsynonymous SNV | CYP26B1:NM_001277742:exon2:c.C346T;p.R116C, CYP26B1:NM_019885:exon3:c.C571T;p.R191C                                                                                                                                                                                                                                                                                                                                                                                                                                                                                                                                                                                                                                                                                                                                                                                 | 1.135 | 7.35E-05 | 0.0003   | 0.0002 Fam88_f_m_aF      | 0/1;0/0;0/1         |
| chr2 | 73112660 | 73112660 | T | C | RAB11FIP5 | exonic | nonsynonymous SNV | RAB11FIP5:NM_001371272:exon1:c.A118G;p.S40G, RAB11FIP5:NM_015470:exon1:c.A118G;p.S40G                                                                                                                                                                                                                                                                                                                                                                                                                                                                                                                                                                                                                                                                                                                                                                               | 1.424 |          |          | Fam118_f_m_aM_aF_uM      | 0/0;0/1;0/1;0/0;0/0 |
| chr2 | 73233156 | 73233156 | A | G | PRADC1    | exonic | nonsynonymous SNV | PRADC1:NM_032319:exon1:c.T5C;p.V2A                                                                                                                                                                                                                                                                                                                                                                                                                                                                                                                                                                                                                                                                                                                                                                                                                                  | 1.592 |          | 0.0005   | 0.0001 Fam106_f_m_aM     | 0/0;0/1;0/1         |
| chr2 | 73250364 | 73250364 | G | A | CCT7      | exonic | nonsynonymous SNV | CCT7:NM_001009570:exon5:c.G517A;p.G173S, CCT7:NM_01166284:exon8:c.G868A;p.G290S, CCT7:NM_006429:exon10:c.G1129A;p.G377S, CCT7:NM_001166285:exon11:c.G997A;p.G333S                                                                                                                                                                                                                                                                                                                                                                                                                                                                                                                                                                                                                                                                                                   | 1.041 | 0.0004   | 0.0006   | 0.0003 Fam99_f_m_aM_aM   | 0/0;0/1;0/0;0/1     |
| chr2 | 73250364 | 73250364 | G | A | CCT7      | exonic | nonsynonymous SNV | CCT7:NM_001009570:exon5:c.G517A;p.G173S, CCT7:NM_01166284:exon8:c.G868A;p.G290S, CCT7:NM_006429:exon10:c.G1129A;p.G377S, CCT7:NM_001166285:exon11:c.G997A;p.G333S                                                                                                                                                                                                                                                                                                                                                                                                                                                                                                                                                                                                                                                                                                   | 1.041 | 0.0004   | 0.0006   | 0.0003 Fam10_f_m_aM_uF   | 0/0;0/1;0/1;0/0     |
| chr2 | 73292017 | 73292017 | C | T | EGR4      | exonic | nonsynonymous SNV | EGR4:NM_001965:exon2:c.G901A;p.G301R                                                                                                                                                                                                                                                                                                                                                                                                                                                                                                                                                                                                                                                                                                                                                                                                                                | 1.496 |          | 0.0001   | 1.40E-05 Fam66_f_m_aM    | 0/0;0/1;0/1         |
| chr2 | 74530335 | 74530335 | C | G | HTRA2     | exonic | nonsynonymous SNV | HTRA2:NM_001321727:exon1:c.C329G;p.A110G, HTRA2:NM_001321728:exon1:c.C329G;p.A110G, HTRA2:NM_013247:exon1:c.C329G;p.A110G, HTRA2:NM_145074:exon1:c.C329G;p.A110G                                                                                                                                                                                                                                                                                                                                                                                                                                                                                                                                                                                                                                                                                                    | 1.309 |          | 3.62E-05 | 6.99E-06 Fam43_f_m_aM    | 0/0;0/1;0/1         |
| chr2 | 74534424 | 74534424 | G | A | LOXL3     | exonic | nonsynonymous SNV | LOXL3:NM_001289165:exon7:c.C748T;p.H250Y, LOXL3:NM_001289164:exon9:c.C1396T;p.H466Y, LOXL3:NM_032603:exon11:c.C1831T;p.H611Y                                                                                                                                                                                                                                                                                                                                                                                                                                                                                                                                                                                                                                                                                                                                        | 1.364 |          |          | Fam22_f_m_aF_aF_uF       | 0/1;0/0;0/1;0/1;0/0 |
| chr2 | 74881851 | 74881851 | G | A | HK2       | exonic | nonsynonymous SNV | HK2:NM_000189:exon11:c.G1711A;p.G571R                                                                                                                                                                                                                                                                                                                                                                                                                                                                                                                                                                                                                                                                                                                                                                                                                               | 1.257 |          | 6.18E-05 | 2.09E-05 Fam15_f_m_aM_aM | 0/1;0/0;0/0;0/1     |
| chr2 | 80393247 | 80393247 | G | A | CTNNA2    | exonic | nonsynonymous SNV | CTNNA2:NM_001282599:exon2:c.G130A;p.A44T, CTNNA2:NM_001164883:exon8:c.G1093A;p.A365T, CTNNA2:NM_001282597:exon8:c.G1093A;p.A365T, CTNNA2:NM_001282598:exon8:c.G1195A;p.A399T, CTNNA2:NM_004389:exon8:c.G1093A;p.A365T                                                                                                                                                                                                                                                                                                                                                                                                                                                                                                                                                                                                                                               | 1.249 |          |          | Fam11_f_m_aM_uM          | 0/0;0/1;0/1;0/1     |



|      |           |           |   |   |          |        |                     |                                                                                                                                                                                                                                                                                                                                                                                                                                                                                                                                                                             |       |   |          |          |          |                     |                     |
|------|-----------|-----------|---|---|----------|--------|---------------------|-----------------------------------------------------------------------------------------------------------------------------------------------------------------------------------------------------------------------------------------------------------------------------------------------------------------------------------------------------------------------------------------------------------------------------------------------------------------------------------------------------------------------------------------------------------------------------|-------|---|----------|----------|----------|---------------------|---------------------|
| chr2 | 85599276  | 85599276  | C | G | TMEM150A | exonic | nonsynonymous SNV   | TMEM150A:NM_001369917:exon7:c.G616C;p.G206R,TM150A:NM_153342:exon7:c.G457C;p.G153R,TMEM150A:NM_001031738:exon8:c.G616C;p.G206R                                                                                                                                                                                                                                                                                                                                                                                                                                              | 1.318 | . | .        | .        | .        | Fam78_f_m_aF_uM     | 0/1;0/0;0/1;0/1     |
| chr2 | 85600008  | 85600008  | G | C | TMEM150A | exonic | nonsynonymous SNV   | TMEM150A:NM_001369917:exon5:c.C279G;p.I93M,TMEM150A:NM_153342:exon5:c.C120G;p.I40M,TMEM150A:NM_001031738:exon6:c.C279G;p.I93M                                                                                                                                                                                                                                                                                                                                                                                                                                               | 1.062 | . | .        | .        | 6.98E-06 | Fam91_m_aM_dM_aM_dM | 0/0;0/1;0/1;0/0;0/1 |
| chr2 | 85609535  | 85609535  | C | A | C2orf68  | exonic | nonsynonymous SNV   | C2orf68:NM_001013649:exon3:c.G278T;p.S931                                                                                                                                                                                                                                                                                                                                                                                                                                                                                                                                   | 1.274 | . | .        | .        | .        | Fam94_f_m_aM        | 0/1;0/0;0/1         |
| chr2 | 85840389  | 85840389  | C | A | ST3GAL5  | exonic | nonsynonymous SNV   | ST3GAL5:NM_001354248:exon6:c.G628T;p.V210F,ST3GAL5:NM_001363847:exon6:c.G853T;p.V285F,ST3GAL5:NM_001042437:exon7:c.G943T;p.V315F,ST3GAL5:NM_001354226:exon7:c.G628T;p.V210F,ST3GAL5:NM_001354238:exon7:c.G928T;p.V310F,ST3GAL5:NM_001354247:exon7:c.G289T;p.V97F,ST3GAL5:NM_003896:exon7:c.G1012T;p.V338F,ST3GAL5:NM_001354224:exon8:c.G628T;p.V210F,ST3GAL5:NM_001354227:exon8:c.G928T;p.V310F,ST3GAL5:NM_001354229:exon8:c.G928T;p.V310F,ST3GAL5:NM_001354233:exon8:c.G628T;p.V210F,ST3GAL5:NM_001354223:exon9:c.G628T;p.V210F,ST3GAL5:NM_001354234:exon9:c.G628T;p.V210F | 1.172 | . | .        | .        | .        | Fam120_f_m_aM_aM    | 0/0;0/1;0/1;0/1     |
| chr2 | 86048953  | 86048953  | C | G | POLR1A   | exonic | nonsynonymous SNV   | POLR1A:NM_015425:exon18:c.G2565C;p.Q855H                                                                                                                                                                                                                                                                                                                                                                                                                                                                                                                                    | 1.313 | . | 7.34E-05 | 7.86E-05 | 2.09E-05 | Fam90_f_m_aF_dM     | 0/0;0/1;0/1;0/0     |
| chr2 | 86054260  | 86054260  | G | C | POLR1A   | exonic | nonsynonymous SNV   | POLR1A:NM_015425:exon15:c.C2088G;p.I696M                                                                                                                                                                                                                                                                                                                                                                                                                                                                                                                                    | 1.361 | . | .        | .        | .        | Fam55_f_m_aM_aM_dM  | 0/0;0/1;0/1;0/0;0/1 |
| chr2 | 86078260  | 86078260  | C | G | POLR1A   | exonic | nonsynonymous SNV   | POLR1A:NM_015425:exon10:c.G1111C;p.D371H                                                                                                                                                                                                                                                                                                                                                                                                                                                                                                                                    | 1.477 | . | .        | .        | .        | Fam62_f_m_aM_aM     | 0/0;0/1;0/1;0/0     |
| chr2 | 86098697  | 86098697  | C | T | POLR1A   | exonic | nonsynonymous SNV   | POLR1A:NM_015425:exon3:c.G346A;p.V116M                                                                                                                                                                                                                                                                                                                                                                                                                                                                                                                                      | 1.277 | . | 7.35E-05 | 4.50E-05 | 4.19E-05 | Fam67_f_m_aM_uF     | 0/0;0/1;0/1;0/0     |
| chr2 | 95382405  | 95382405  | A | G | KCNIP3   | exonic | nonsynonymous SNV   | KCNIP3:NM_001034914:exon6:c.A506G;p.Y169C,KCNIP3:NM_013434:exon7:c.A584G;p.Y195C                                                                                                                                                                                                                                                                                                                                                                                                                                                                                            | 1.428 | . | .        | .        | .        | Fam54_f_m_aM_uF     | 0/0;0/1;0/1;0/1     |
| chr2 | 96145218  | 96145218  | G | T | DUSP2    | exonic | nonsynonymous SNV   | DUSP2:NM_004418:exon1:c.C137A;p.A46E                                                                                                                                                                                                                                                                                                                                                                                                                                                                                                                                        | 2.291 | . | .        | .        | .        | Fam79_f_m_aM_uM     | 0/0;0/1;0/1;0/1     |
| chr2 | 96186734  | 96186734  | G | A | STARD7   | exonic | nonsynonymous SNV   | STARD7:NM_020151:exon8:c.C1109T;p.A370V                                                                                                                                                                                                                                                                                                                                                                                                                                                                                                                                     | 1.538 | . | .        | .        | .        | Fam49_f_m_aM        | 0/1;0/0;0/1         |
| chr2 | 96284568  | 96284568  | G | C | SNRNP200 | exonic | stopgain            | SNRNP200:NM_014014:exon31:c.C4182G;p.Y1394X                                                                                                                                                                                                                                                                                                                                                                                                                                                                                                                                 | 0.312 | . | .        | .        | .        | Fam98_f_m_aM        | 0/1;0/0;0/1         |
| chr2 | 96286455  | 96286455  | G | A | SNRNP200 | exonic | nonsynonymous SNV   | SNRNP200:NM_014014:exon29:c.C3859T;p.R1287W                                                                                                                                                                                                                                                                                                                                                                                                                                                                                                                                 | 2.153 | . | .        | .        | .        | Fam60_f_m_aF        | 0/1;0/0;0/1         |
| chr2 | 96296651  | 96296651  | C | T | SNRNP200 | exonic | nonsynonymous SNV   | SNRNP200:NM_014014:exon13:c.G1556A;p.R519Q                                                                                                                                                                                                                                                                                                                                                                                                                                                                                                                                  | 1.092 | . | .        | 1.12E-05 | .        | Fam63_f_m_aF        | 0/1;0/0;0/1         |
| chr2 | 96296979  | 96296979  | C | T | SNRNP200 | exonic | nonsynonymous SNV   | SNRNP200:NM_014014:exon12:c.G1469A;p.R490H                                                                                                                                                                                                                                                                                                                                                                                                                                                                                                                                  | 1.175 | . | .        | 3.27E-05 | 1.40E-05 | Fam71_f_m_aF        | 0/1;0/0;0/1         |
| chr2 | 96865743  | 96865743  | G | T | SEMA4C   | exonic | nonsynonymous SNV   | SEMA4C:NM_017789:exon5:c.C343A;p.R1155                                                                                                                                                                                                                                                                                                                                                                                                                                                                                                                                      | 1.962 | . | .        | .        | .        | Fam1_f_m_aM         | 0/1;0/0;0/1         |
| chr2 | 97735320  | 97735320  | C | T | ZAP70    | exonic | nonsynonymous SNV   | ZAP70:NM_207519:exon2:c.C232T;p.R78C,ZAP70:NM_001079:exon10:c.C1153T;p.R385C                                                                                                                                                                                                                                                                                                                                                                                                                                                                                                | 1.863 | . | 0.0001   | 0.0001   | 4.88E-05 | Fam27_f_m_aF_uM_uM  | 0/0;0/1;0/1;0/0;0/1 |
| chr2 | 102619936 | 102619936 | G | C | SLC9A2   | exonic | nonsynonymous SNV   | SLC9A2:NM_003048:exon1:c.G88C;p.G30R                                                                                                                                                                                                                                                                                                                                                                                                                                                                                                                                        | 1.388 | . | .        | .        | .        | Fam16_f_m_aM_aM     | 0/0;0/1;0/0;0/1     |
| chr2 | 105307898 | 105307898 | C | A | TGFBRAP1 | exonic | nonsynonymous SNV   | TGFBRAP1:NM_001142621:exon2:c.G404T;p.C135F,TGFBRAP1:NM_001328646:exon2:c.G404T;p.C135F,TGFBRAP1:NM_004257:exon2:c.G404T;p.C135F                                                                                                                                                                                                                                                                                                                                                                                                                                            | 1.207 | . | 7.34E-05 | .        | .        | Fam33_f_m_aM_uM     | 0/0;0/1;0/1;0/1     |
| chr2 | 106843814 | 106843814 | T | C | ST6GAL2  | exonic | nonsynonymous SNV   | ST6GAL2:NM_001142351:exon2:c.A164G;p.Q55R,ST6GAL2:NM_001142352:exon2:c.A164G;p.Q55R,ST6GAL2:NM_00132262:exon2:c.A164G;p.Q55R,ST6GAL2:NM_032528:exon2:c.A164G;p.Q55R                                                                                                                                                                                                                                                                                                                                                                                                         | 1.451 | . | .        | 1.16E-05 | 1.40E-05 | Fam37_f_m_aF_uM     | 0/0;0/1;0/1;0/0     |
| chr2 | 107997852 | 107997852 | G | A | SLC5A7   | exonic | nonsynonymous SNV   | SLC5A7:NM_001305006:exon4:c.G148A;p.V50M,SLC5A7:NM_001305005:exon5:c.G463A;p.V155M,SLC5A7:NM_021815:exon5:c.G463A;p.V155M                                                                                                                                                                                                                                                                                                                                                                                                                                                   | 1.923 | . | .        | 1.13E-05 | 2.79E-05 | Fam34_f_m_aM_uF     | 0/0;0/1;0/1;0/1     |
| chr2 | 108782651 | 108782651 | C | T | RANBP2   | exonic | nonsynonymous SNV   | RANBP2:NM_006267:exon28:c.C9158T;p.S305L                                                                                                                                                                                                                                                                                                                                                                                                                                                                                                                                    | 1.049 | . | .        | 0.0001   | 4.19E-05 | Fam14_f_m_aM_aM     | 0/1;0/0;0/1;0/1     |
| chr2 | 112187348 | 112187348 | C | A | FBLN7    | exonic | nonsynonymous SNV   | FBLN7:NM_001128165:exon7:c.C1024A;p.R342S,FBLN7:NM_153214:exon8:c.C1162A;p.R388S                                                                                                                                                                                                                                                                                                                                                                                                                                                                                            | 1.048 | . | .        | .        | .        | Fam100_f_m_aF       | 0/1;0/0;0/1         |
| chr2 | 117819792 | 117819792 | G | - | DDX18    | exonic | frameshift deletion | DDX18:NM_006773:exon3:c.514delG;p.G172Efs*20                                                                                                                                                                                                                                                                                                                                                                                                                                                                                                                                | 0.496 | . | .        | .        | .        | Fam45_f_m_aM_uF     | 0/0;0/1;0/1;0/0     |
| chr2 | 119157614 | 119157614 | A | G | C1QL2    | exonic | nonsynonymous SNV   | C1QL2:NM_182528:exon1:c.T656C;p.M219T                                                                                                                                                                                                                                                                                                                                                                                                                                                                                                                                       | 1.543 | . | .        | .        | .        | Fam4_f_m_aM         | 0/1;0/0;0/1         |
| chr2 | 120222207 | 120222207 | A | G | TMEM185B | exonic | nonsynonymous SNV   | TMEM185B:NM_024121:exon1:c.T770C;p.L257S                                                                                                                                                                                                                                                                                                                                                                                                                                                                                                                                    | 1.013 | . | 0.0006   | 0.0006   | 0.0002   | Fam119_f_m_aM_aM    | 0/0;0/1;0/1;0/1     |
| chr2 | 120349458 | 120349458 | G | A | INHBB    | exonic | nonsynonymous SNV   | INHBB:NM_002193:exon2:c.G808A;p.E270K                                                                                                                                                                                                                                                                                                                                                                                                                                                                                                                                       | 1.585 | . | .        | .        | .        | Fam13_f_m_aM        | 0/0;0/1;0/1         |
| chr2 | 120986563 | 120986563 | G | A | GLI2     | exonic | nonsynonymous SNV   | GLI2:NM_001371271:exon13:c.G2242A;p.G748R,GLI2:NM_005270:exon13:c.G2242A;p.G748R                                                                                                                                                                                                                                                                                                                                                                                                                                                                                            | 1.179 | . | .        | 0.0004   | 0.0002   | Fam25_f_m_aM        | 0/0;0/1;0/1         |
| chr2 | 121242406 | 121242406 | C | T | TFCP2L1  | exonic | nonsynonymous SNV   | TFCP2L1:NM_014553:exon7:c.G721A;p.E241K                                                                                                                                                                                                                                                                                                                                                                                                                                                                                                                                     | 1.442 | . | .        | .        | .        | Fam60_f_m_aF        | 0/0;0/1;0/1         |
| chr2 | 121367762 | 121367762 | G | A | CLASP1   | exonic | nonsynonymous SNV   | CLASP1:NM_001142274:exon33:c.C3511T;p.R1171W,CLASP1:NM_001207051:exon33:c.C3529T;p.R1177W,CLASP1:NM_001142273:exon34:c.C3535T;p.R1179W,CLASP1:NM_015282:exon34:c.C3712T;p.R1238W                                                                                                                                                                                                                                                                                                                                                                                            | 1.123 | . | 7.35E-05 | 3.38E-05 | 2.09E-05 | Fam65_f_m_aM_uF_dF  | 0/1;0/0;0/1;0/1;0/0 |
| chr2 | 127292740 | 127292740 | T | G | ERCC3    | exonic | nonsynonymous SNV   | ERCC3:NM_000122:exon3:c.A341C;p.H114P,ERCC3:NM_001303418:exon3:c.A149C;p.H50P                                                                                                                                                                                                                                                                                                                                                                                                                                                                                               | 1.129 | . | .        | 1.12E-05 | .        | Fam44_f_m_aM_uF     | 0/1;0/0;0/1;0/1     |
| chr2 | 127496086 | 127496086 | C | T | IWS1     | exonic | nonsynonymous SNV   | IWS1:NM_017969:exon7:c.G1628A;p.R543H                                                                                                                                                                                                                                                                                                                                                                                                                                                                                                                                       | 2.4   | . | 7.34E-05 | 7.46E-05 | 6.98E-06 | Fam12_f_m_aM_uM_aM  | 0/0;0/1;0/1;0/0;0/0 |
| chr2 | 127651499 | 127651499 | G | A | GPR17    | exonic | nonsynonymous SNV   | GPR17:NM_001161417:exon2:c.G764A;p.R255H,GPR17:NM_001161416:exon3:c.G764A;p.R255H,GPR17:NM_005291:exon3:c.G848A;p.R283H,GPR17:NM_001161415:exon4:c.G848A;p.R283H                                                                                                                                                                                                                                                                                                                                                                                                            | 1.008 | . | .        | 0.0001   | 2.09E-05 | Fam28_f_m_aF_uF     | 0/0;0/1;0/1;0/0     |
| chr2 | 127708860 | 127708860 | G | A | WDR33    | exonic | nonsynonymous SNV   | WDR33:NM_018383:exon21:c.C3598T;p.R1200C                                                                                                                                                                                                                                                                                                                                                                                                                                                                                                                                    | 1.121 | . | 0.0003   | 7.49E-05 | 4.19E-05 | Fam121_f_m_aF_aM    | 0/0;0/1;0/1;0/1     |
| chr2 | 132417658 | 132417658 | A | G | GPR39    | exonic | nonsynonymous SNV   | GPR39:NM_001508:exon1:c.A616G;p.N206D                                                                                                                                                                                                                                                                                                                                                                                                                                                                                                                                       | 1.131 | . | .        | 1.12E-05 | 6.98E-06 | Fam4_f_m_aM         | 0/1;0/0;0/1         |
| chr2 | 134349873 | 134349873 | C | G | MGAT5    | exonic | nonsynonymous SNV   | MGAT5:NM_002410:exon9:c.C1181G;p.S394W,MGAT5:NM_001371457:exon10:c.C1181G;p.S394W                                                                                                                                                                                                                                                                                                                                                                                                                                                                                           | 1.909 | . | .        | .        | 6.98E-06 | Fam2_f_m_aF         | 0/1;0/0;0/1         |
| chr2 | 135798074 | 135798074 | G | A | LCT      | exonic | nonsynonymous SNV   | LCT:NM_002299:exon13:c.C4931T;p.T1644M                                                                                                                                                                                                                                                                                                                                                                                                                                                                                                                                      | 1.611 | . | .        | 9.80E-05 | 1.40E-05 | Fam25_f_m_aM        | 0/1;0/0;0/1         |
| chr2 | 135808933 | 135808933 | T | G | LCT      | exonic | nonsynonymous SNV   | LCT:NM_002299:exon8:c.A3414C;p.R1138S                                                                                                                                                                                                                                                                                                                                                                                                                                                                                                                                       | 1.565 | . | .        | .        | .        | Fam95_f_m_aM_aM_uF  | 0/0;0/1;0/1;0/1;0/0 |

|      |           |           |   |   |          |          |                   |                                                                                                                                                                                                                                                                                                                                                                                                                                                                                                                                                                |       |          |          |                      |                     |                     |
|------|-----------|-----------|---|---|----------|----------|-------------------|----------------------------------------------------------------------------------------------------------------------------------------------------------------------------------------------------------------------------------------------------------------------------------------------------------------------------------------------------------------------------------------------------------------------------------------------------------------------------------------------------------------------------------------------------------------|-------|----------|----------|----------------------|---------------------|---------------------|
| chr2 | 135809642 | 135809642 | G | T | LCT      | exonic   | nonsynonymous SNV | LCT:NM_002299:exon8:c.C2705A:p.T902K                                                                                                                                                                                                                                                                                                                                                                                                                                                                                                                           | 1.416 | 3.28E-05 | 6.98E-06 | Fam114_f_m_aM        | 0/1;0/0;0/1         |                     |
| chr2 | 147917386 | 147917386 | T | G | ACVR2A   | exonic   | nonsynonymous SNV | ACVR2A:NM_001278580:exon6:c.T452G;p.V151G,ACVR2A:NM_001616:exon6:c.T776G;p.V259G,ACVR2A:NM_001278579:exon7:c.T776G;p.V259G                                                                                                                                                                                                                                                                                                                                                                                                                                     | 1.051 |          |          | Fam103_f_m_aM        | 0/0;0/1;0/1         |                     |
| chr2 | 148994424 | 148994424 | G | A | KIF5C    | exonic   | nonsynonymous SNV | KIF5C:NM_004522:exon17:c.G1909A;p.E637K                                                                                                                                                                                                                                                                                                                                                                                                                                                                                                                        | 1.21  |          | 3.49E-05 | Fam34_f_m_aM_uF      | 0/1;0/0;0/1;0/0     |                     |
| chr2 | 150470051 | 150470051 | G | C | RND3     | exonic   | nonsynonymous SNV | RND3:NM_001254738:exon5:c.C671G;p.P224R,RND3:NM_005168:exon6:c.C671G;p.P224R                                                                                                                                                                                                                                                                                                                                                                                                                                                                                   | 1.228 | 1.12E-05 | 2.09E-05 | Fam84_f_m_aF         | 0/1;0/0;0/1         |                     |
| chr2 | 151667802 | 151667802 | A | T | NEB      | splicing | .                 | .                                                                                                                                                                                                                                                                                                                                                                                                                                                                                                                                                              | 0.597 |          |          | Fam69_f_m_aM         | 0/1;0/0;0/1         |                     |
| chr2 | 151860740 | 151860740 | A | G | CACNB4   | exonic   | nonsynonymous SNV | CACNB4:NM_001005747:exon9:c.T737C;p.I246T,CACNB4:NM_001330114:exon9:c.T185C;p.I62T,CACNB4:NM_000726:exon10:c.T839C;p.I280T,CACNB4:NM_001005746:exon10:c.T785C;p.I262T,CACNB4:NM_001145798:exon10:c.T839C;p.I280T,CACNB4:NM_001320722:exon10:c.T698C;p.I233T,CACNB4:NM_001330118:exon10:c.T698C;p.I233T,CACNB4:NM_001330117:exon11:c.T281C;p.I94T                                                                                                                                                                                                               | 1.692 | 0.0003   | 6.98E-06 | Fam98_f_m_aM         | 0/1;0/0;0/1         |                     |
| chr2 | 152626621 | 152626621 | G | C | FMNL2    | exonic   | nonsynonymous SNV | FMNL2:NM_052905:exon17:c.G2059C;p.G687R                                                                                                                                                                                                                                                                                                                                                                                                                                                                                                                        | 1.2   | 0.0002   | 6.29E-05 | Fam51_f_m_aM_uF      | 0/1;0/0;0/1;0/1     |                     |
| chr2 | 161203491 | 161203491 | A | G | TANK     | exonic   | nonsynonymous SNV | TANK:NM_001199135:exon3:c.A104G;p.E35G,TANK:NM_004180:exon3:c.A104G;p.E35G,TANK:NM_133484:exon3:c.A104G;p.E35G                                                                                                                                                                                                                                                                                                                                                                                                                                                 | 1.077 |          |          | Fam67_f_m_aM_uF      | 0/0;0/1;0/1;0/1     |                     |
| chr2 | 165090286 | 165090286 | T | C | SCN3A    | exonic   | nonsynonymous SNV | SCN3A:NM_001081676:exon28:c.A5720G;p.E1907G,SCN3A:NM_001081677:exon28:c.A5720G;p.E1907G,SCN3A:NM_006922:exon28:c.A5867G;p.E1956G                                                                                                                                                                                                                                                                                                                                                                                                                               | 1.813 |          |          | Fam29_f_m_aF_uM      | 0/1;0/0;0/1;0/1     |                     |
| chr2 | 165091265 | 165091265 | G | A | SCN3A    | exonic   | stopgain          | SCN3A:NM_001081676:exon28:c.C4741T;p.R1581X,SCN3A:NM_001081677:exon28:c.C4741T;p.R1581X,SCN3A:NM_006922:exon28:c.C4888T;p.R1630X                                                                                                                                                                                                                                                                                                                                                                                                                               | 0.348 |          |          | Fam40_f_m_aM_aM      | 0/0;0/0;0/1;0/0     |                     |
| chr2 | 165374892 | 165374892 | C | T | SCN2A    | exonic   | stopgain          | SCN2A:NM_001040142:exon22:c.C4180T;p.Q1394X,SCN2A:NM_001371246:exon22:c.C4180T;p.Q1394X,SCN2A:NM_001371247:exon22:c.C4180T;p.Q1394X,SCN2A:NM_021007:exon22:c.C4180T;p.Q1394X,SCN2A:NM_001040143:exon23:c.C4180T;p.Q1394X                                                                                                                                                                                                                                                                                                                                       | 0.161 |          |          | Fam113_f_m_aF_raM_uF | 0/0;0/0;0/0;0/1;0/0 |                     |
| chr2 | 166043728 | 166043728 | A | C | SCN1A    | exonic   | nonsynonymous SNV | SCN1A:NM_001353948:exon12:c.T1984G;p.S662A,SCN1A:NM_001353949:exon12:c.T1984G;p.S662A,SCN1A:NM_001353951:exon12:c.T1984G;p.S662A,SCN1A:NM_001353955:exon12:c.T1981G;p.S661A,SCN1A:NM_001202435:exon13:c.T1984G;p.S662A,SCN1A:NM_001353950:exon13:c.T1984G;p.S662A,SCN1A:NM_001353952:exon13:c.T1984G;p.S662A,SCN1A:NM_001353954:exon13:c.T1981G;p.S661A,SCN1A:NM_001165963:exon14:c.T1984G;p.S662A,SCN1A:NM_006920:exon14:c.T1984G;p.S662A                                                                                                                     | 1.069 |          |          | Fam43_f_m_aM         | 0/1;0/0;0/1         |                     |
| chr2 | 166073542 | 166073542 | C | G | SCN1A    | exonic   | nonsynonymous SNV | SCN1A:NM_001353948:exon2:c.G80C;p.R27T,SCN1A:NM_001353949:exon2:c.G80C;p.R27T,SCN1A:NM_001353951:exon2:c.G80C;p.R27T,SCN1A:NM_001353955:exon2:c.G80C;p.R27T,SCN1A:NM_001353957:exon2:c.G80C;p.R27T,SCN1A:NM_001165964:exon3:c.G80C;p.R27T,SCN1A:NM_001202435:exon3:c.G80C;p.R27T,SCN1A:NM_001353950:exon3:c.G80C;p.R27T,SCN1A:NM_001353952:exon3:c.G80C;p.R27T,SCN1A:NM_001353954:exon3:c.G80C;p.R27T,SCN1A:NM_001353958:exon3:c.G80C;p.R27T,SCN1A:NM_001353960:exon3:c.G80C;p.R27T,SCN1A:NM_001165963:exon4:c.G80C;p.R27T,SCN1A:NM_006920:exon4:c.G80C;p.R27T | 1.001 | 0.0001   | 5.59E-05 | Fam69_f_m_aM         | 0/0;0/1;0/1         |                     |
| chr2 | 168167368 | 168167368 | C | T | STK39    | exonic   | nonsynonymous SNV | STK39:NM_013233:exon3:c.G361A;p.V121I                                                                                                                                                                                                                                                                                                                                                                                                                                                                                                                          | 1.013 | 0.0003   | 7.68E-05 | Fam47_f_m_aM         | 0/0;0/1;0/1         |                     |
| chr2 | 168247235 | 168247235 | C | G | STK39    | exonic   | nonsynonymous SNV | STK39:NM_013233:exon1:c.G201C;p.E67D                                                                                                                                                                                                                                                                                                                                                                                                                                                                                                                           | 1.066 |          |          | Fam39_f_m_aM         | 0/0;0/1;0/1         |                     |
| chr2 | 169170603 | 169170603 | C | A | LRP2     | exonic   | nonsynonymous SNV | LRP2:NM_004525:exon59:c.G11328T;p.W3776C                                                                                                                                                                                                                                                                                                                                                                                                                                                                                                                       | 1.101 | 7.34E-05 | 6.70E-05 | Fam38_f_m_aM         | 0/0;0/1;0/1         |                     |
| chr2 | 170853871 | 170853871 | A | T | GAD1     | splicing | .                 | .                                                                                                                                                                                                                                                                                                                                                                                                                                                                                                                                                              | 0.569 |          |          | Fam81_f_m_aM_uM      | 0/1;0/0;0/1;0/1     |                     |
| chr2 | 170853966 | 170853966 | A | G | GAD1     | exonic   | nonsynonymous SNV | GAD1:NM_000817:exon14:c.A1357G;p.I453V                                                                                                                                                                                                                                                                                                                                                                                                                                                                                                                         | 1.391 |          |          | Fam24_f_m_aM_aM      | 0/1;0/0;0/0;0/1     |                     |
| chr2 | 171787636 | 171787636 | C | A | SLC25A12 | exonic   | nonsynonymous SNV | SLC25A12:NM_003705:exon17:c.G1770T;p.Q590H                                                                                                                                                                                                                                                                                                                                                                                                                                                                                                                     | 1.509 |          |          | Fam27_f_m_aF_uM_uM   | 0/1;0/0;0/1;0/1;0/0 |                     |
| chr2 | 172487808 | 172487808 | G | A | ITGA6    | splicing | .                 | .                                                                                                                                                                                                                                                                                                                                                                                                                                                                                                                                                              | 0.52  |          | 1.12E-05 | Fam99_f_m_aM_aM      | 0/0;0/1;0/0;0/1     |                     |
| chr2 | 172491261 | 172491261 | C | T | ITGA6    | exonic   | nonsynonymous SNV | ITGA6:NM_000210:exon22:c.C2819T;p.P940L,ITGA6:NM_01079818:exon22:c.C2819T;p.P940L,ITGA6:NM_001316306:exon22:c.C2462T;p.P821L,ITGA6:NM_001365529:exon22:c.C2774T;p.P925L,ITGA6:NM_001365530:exon22:c.C2774T;p.P925L                                                                                                                                                                                                                                                                                                                                             | 1.232 | 0.0009   | 0.001    | 0.0009               | Fam12_f_m_aM_uM_aM  | 0/1;0/0;0/1;0/1;0/1 |
| chr2 | 172985472 | 172985472 | C | T | RAPGEF4  | exonic   | nonsynonymous SNV | RAPGEF4:NM_001282901:exon6:c.C469T;p.H157Y,RAPGEF4:NM_001282900:exon8:c.C616T;p.H206Y,RAPGEF4:NM_01100397:exon9:c.C697T;p.H233Y,RAPGEF4:NM_001282899:exon9:c.C670T;p.H224Y,RAPGEF4:NM_007023:exon12:c.C1129T;p.H377Y                                                                                                                                                                                                                                                                                                                                           | 1.129 |          |          | Fam42_f_m_aM_uF      | 0/1;0/0;0/1;0/0     |                     |
| chr2 | 174754320 | 174754320 | A | G | CHRNA1   | exonic   | nonsynonymous SNV | CHRNA1:NM_000079:exon5:c.T439C;p.Y147H,CHRNA1:NM_001039523:exon6:c.T514C;p.Y172H                                                                                                                                                                                                                                                                                                                                                                                                                                                                               | 1.039 | 1.12E-05 | 6.98E-06 | Fam64_f_m_aM         | 0/1;0/0;0/1         |                     |
| chr2 | 176122910 | 176122910 | C | T | HOXD9    | exonic   | nonsynonymous SNV | HOXD9:NM_014213:exon1:c.C142T;p.R48W                                                                                                                                                                                                                                                                                                                                                                                                                                                                                                                           | 1.509 |          |          | Fam39_f_m_aM         | 0/0;0/1;0/1         |                     |
| chr2 | 176123076 | 176123076 | C | G | HOXD9    | exonic   | nonsynonymous SNV | HOXD9:NM_014213:exon1:c.C308G;p.P103R                                                                                                                                                                                                                                                                                                                                                                                                                                                                                                                          | 1.417 |          | 3.53E-05 | Fam21_f_m_aM_uM      | 0/1;0/0;0/1;0/0     |                     |
| chr2 | 177482157 | 177482157 | G | A | AGPS     | exonic   | nonsynonymous SNV | AGPS:NM_003659:exon11:c.G1204A;p.V402I                                                                                                                                                                                                                                                                                                                                                                                                                                                                                                                         | 1.137 | 7.40E-05 | 0.0005   | 4.20E-05             | Fam73_f_m_aF_dM     | 0/1;0/0;0/1;0/0     |

|      |           |           |   |   |          |          |                   |                                                                                                                                                                                                                                                                                                                                                                                                                                                                                                                                                                                                                                  |       |          |                      |                          |                     |                     |
|------|-----------|-----------|---|---|----------|----------|-------------------|----------------------------------------------------------------------------------------------------------------------------------------------------------------------------------------------------------------------------------------------------------------------------------------------------------------------------------------------------------------------------------------------------------------------------------------------------------------------------------------------------------------------------------------------------------------------------------------------------------------------------------|-------|----------|----------------------|--------------------------|---------------------|---------------------|
| chr2 | 178374007 | 178374007 | G | C | OSBPL6   | exonic   | nonsynonymous SNV | OSBPL6:NM_001201481:exon14:c.G1420C:p.A474P,OSBPL6:NM_001201482:exon14:c.G1405C:p.A469P,OSBPL6:NM_145739:exon14:c.G1525C:p.A509P,OSBPL6:NM_032523:exon15:c.G1513C:p.A505P,OSBPL6:NM_001201480:exon16:c.G1588C:p.A530P                                                                                                                                                                                                                                                                                                                                                                                                            | 1.143 | 6.56E-05 | Fam4_f_m_aM          | 0/0;0/1;0/1              |                     |                     |
| chr2 | 178384178 | 178384178 | T | C | OSBPL6   | splicing | .                 | .                                                                                                                                                                                                                                                                                                                                                                                                                                                                                                                                                                                                                                | 0.476 | .        | Fam117_f_m_aM_aF     | 0/1;0/0;0/0;0/1          |                     |                     |
| chr2 | 179172200 | 179172200 | C | T | SESTD1   | exonic   | nonsynonymous SNV | SESTD1:NM_178123:exon5:c.G289A:p.V97M                                                                                                                                                                                                                                                                                                                                                                                                                                                                                                                                                                                            | 1.532 | .        | Fam74_f_m_aM_uM      | 0/1;0/0;0/1;0/1          |                     |                     |
| chr2 | 181498664 | 181498664 | G | C | ITGA4    | exonic   | nonsynonymous SNV | ITGA4:NM_000885:exon15:c.G1582C:p.E528Q                                                                                                                                                                                                                                                                                                                                                                                                                                                                                                                                                                                          | 1.11  | 0.0001   | 6.75E-05             | 0.0003 Fam53_f_m_aM      | 0/0;0/1;0/1         |                     |
| chr2 | 182925721 | 182925721 | C | T | NCKAP1   | exonic   | nonsynonymous SNV | NCKAP1:NM_013436:exon31:c.G3368A:p.S1123N,NCKAP1:NM_205842:exon32:c.G3386A:p.S1129N,CALCRL:NM_001271751:exon9:c.T722C:p.I241T,CALCRL:NM_005795:exon10:c.T722C:p.I241T,CALCRL:NM_001369434:exon11:c.T722C:p.I241T,CALCRL:NM_001369435:exon11:c.T722C:p.I241T                                                                                                                                                                                                                                                                                                                                                                      | 1.117 | .        | 6.99E-06             | Fam15_f_m_aM_aM          | 0/0;0/1;0/1;0/0     |                     |
| chr2 | 187360657 | 187360657 | A | G | CALCRL   | exonic   | nonsynonymous SNV | M_005795:exon10:c.T722C:p.I241T,CALCRL:NM_001369434:exon11:c.T722C:p.I241T,CALCRL:NM_001369435:exon11:c.T722C:p.I241T                                                                                                                                                                                                                                                                                                                                                                                                                                                                                                            | 1.422 | .        | Fam119_f_m_aM_aM     | 0/0;0/1;0/1;0/0          |                     |                     |
| chr2 | 189179604 | 189179604 | T | C | COL5A2   | exonic   | startloss         | COL5A2:NM_000393:exon1:c.A1G:p.M2del                                                                                                                                                                                                                                                                                                                                                                                                                                                                                                                                                                                             | 0.106 | .        | 6.87E-05             | 1.40E-05 Fam40_f_m_aM_aM | 0/0;0/1;0/1;0/0     |                     |
| chr2 | 190659385 | 190659385 | A | T | NAB1     | exonic   | nonsynonymous SNV | NAB1:NM_001321314:exon1:c.A209T:p.K70M,NAB1:NM_01321315:exon1:c.A209T:p.K70M,NAB1:NM_001321312:exon2:c.A209T:p.K70M,NAB1:NM_001321313:exon2:c.A209T:p.K70M,NAB1:NM_005966:exon4:c.A209T:p.K70M                                                                                                                                                                                                                                                                                                                                                                                                                                   | 1.096 | .        | Fam13_f_m_aM         | 0/0;0/1;0/1              |                     |                     |
| chr2 | 190982452 | 190982452 | G | A | STAT1    | exonic   | stopgain          | STAT1:NM_007315:exon18:c.C1513T:p.Q505X,STAT1:NM_139266:exon18:c.C1513T:p.Q505X                                                                                                                                                                                                                                                                                                                                                                                                                                                                                                                                                  | 0.271 | .        | Fam37_f_m_aF_uM      | 0/0;0/1;0/1;0/0          |                     |                     |
| chr2 | 191341485 | 191341485 | A | G | MYO1B    | exonic   | nonsynonymous SNV | MYO1B:NM_001130158:exon5:c.A371G:p.Y124C,MYO1B:NM_001161819:exon5:c.A371G:p.Y124C,MYO1B:NM_001330237:exon5:c.A371G:p.Y124C,MYO1B:NM_001330238:exon5:c.A371G:p.Y124C,MYO1B:NM_012223:exon5:c.A371G:p.Y124C                                                                                                                                                                                                                                                                                                                                                                                                                        | 1.247 | 2.24E-05 | 2.09E-05             | Fam75_f_m_aM             | 0/0;0/1;0/1         |                     |
| chr2 | 191846602 | 191846602 | G | T | CAVIN2   | exonic   | nonsynonymous SNV | CAVIN2:NM_004657:exon1:c.C324A:p.S108R                                                                                                                                                                                                                                                                                                                                                                                                                                                                                                                                                                                           | 1.014 | .        | Fam65_f_m_aM_uF_dF   | 0/1;0/0;0/1;0/1;0/1      |                     |                     |
| chr2 | 195728251 | 195728251 | C | T | SLC39A10 | exonic   | nonsynonymous SNV | SLC39A10:NM_001127257:exon9:c.C2239T:p.L747F,SLC39A10:NM_020342:exon9:c.C2239T:p.L747F                                                                                                                                                                                                                                                                                                                                                                                                                                                                                                                                           | 1.361 | .        | Fam110_f_m_aM_aM_uMs | 0/0;0/1;0/1;0/0;0/0      |                     |                     |
| chr2 | 196253944 | 196253944 | C | T | HECW2    | exonic   | nonsynonymous SNV | HECW2:NM_001304840:exon17:c.G2437A:p.V813M,HECW2:NM_001348768:exon19:c.G3505A:p.V1169M,HECW2:NM_020760:exon19:c.G3505A:p.V1169M                                                                                                                                                                                                                                                                                                                                                                                                                                                                                                  | 1.129 | 7.34E-05 | 0.0001               | 6.98E-06                 | Fam118_f_m_aM_aF_uM | 0/0;0/1;0/1;0/1;0/0 |
| chr2 | 196271199 | 196271199 | G | A | HECW2    | exonic   | nonsynonymous SNV | HECW2:NM_001348768:exon15:c.C2261T:p.S754L,HECW2:NM_001348768:exon17:c.C3329T:p.S1110L,HECW2:NM_020760:exon17:c.C3329T:p.S1110L                                                                                                                                                                                                                                                                                                                                                                                                                                                                                                  | 1.049 | .        | Fam85_f_m_aM_aM      | 0/0;0/1;0/0;0/1          |                     |                     |
| chr2 | 196317282 | 196317282 | A | G | HECW2    | exonic   | nonsynonymous SNV | HECW2:NM_001304840:exon8:c.T1358C:p.L453P,HECW2:NM_001348768:exon10:c.T2426C:p.L809P,HECW2:NM_020760:exon10:c.T2426C:p.L809P                                                                                                                                                                                                                                                                                                                                                                                                                                                                                                     | 1.317 | .        | Fam68_f_m_aF_uF_uM   | 0/0;0/0;0/1;0/0;0/0      |                     |                     |
| chr2 | 198084406 | 198084406 | C | T | PLCL1    | exonic   | nonsynonymous SNV | PLCL1:NM_006226:exon2:c.C889T:p.R297C                                                                                                                                                                                                                                                                                                                                                                                                                                                                                                                                                                                            | 1.042 | .        | 1.12E-05             | 6.98E-06                 | Fam37_f_m_aF_uM     | 0/0;0/1;0/1;0/1     |
| chr2 | 198084752 | 198084752 | C | G | PLCL1    | exonic   | nonsynonymous SNV | PLCL1:NM_006226:exon2:c.C1235G:p.S412C                                                                                                                                                                                                                                                                                                                                                                                                                                                                                                                                                                                           | 1.036 | .        | Fam24_f_m_aM_aM      | 0/0;0/1;0/1;0/1          |                     |                     |
| chr2 | 198085060 | 198085060 | C | T | PLCL1    | exonic   | nonsynonymous SNV | PLCL1:NM_006226:exon2:c.C1543T:p.L515F                                                                                                                                                                                                                                                                                                                                                                                                                                                                                                                                                                                           | 1.094 | .        | 1.12E-05             | Fam89_f_m_aM             | 0/1;0/0;0/1         |                     |
| chr2 | 199959809 | 199959809 | C | T | MAIP1    | exonic   | nonsynonymous SNV | MAIP1:NM_001369399:exon4:c.C578T:p.A193V,M_024520:exon4:c.C578T:p.A193V,FAM126B:NM_001321618:exon11:c.G1457A:p.R486Q,FAM126B:NM_001321621:exon11:c.G1457A:p.R486Q,FAM126B:NM_001321619:exon12:c.G1457A:p.R486Q,FAM126B:NM_001321624:exon12:c.G1625A:p.R542Q,FAM126B:NM_173822:exon12:c.G1457A:p.R486Q,FAM126B:NM_001321622:exon13:c.G1457A:p.R486Q,FAM126B:NM_001321623:exon13:c.G1625A:p.R542Q,FAM126B:NM_001321625:exon13:c.G1625A:p.R542Q,FAM126B:NM_001321626:exon13:c.G1625A:p.R542Q,FAM126B:NM_001321629:exon13:c.G1211A:p.R404Q,FAM126B:NM_001321627:exon14:c.G1379A:p.R460Q,FAM126B:NM_001321628:exon14:c.G1379A:p.R460Q | 1.206 | .        | 6.98E-06             | Fam19_f_m_aM             | 0/0;0/1;0/1         |                     |
| chr2 | 200981406 | 200981406 | C | T | FAM126B  | exonic   | nonsynonymous SNV | STRADB:NM_001206864:exon8:c.T593C:p.V198A,STRADB:NM_018571:exon8:c.T593C:p.V198A                                                                                                                                                                                                                                                                                                                                                                                                                                                                                                                                                 | 1.198 | .        | 6.98E-06             | Fam33_f_m_aM_uM          | 0/1;0/0;0/1;0/1     |                     |
| chr2 | 201477663 | 201477663 | T | C | STRADB   | exonic   | nonsynonymous SNV | STRADB:NM_001206864:exon8:c.T593C:p.V198A,STRADB:NM_018571:exon8:c.T593C:p.V198A                                                                                                                                                                                                                                                                                                                                                                                                                                                                                                                                                 | 1.721 | 2.23E-05 | 1.40E-05             | Fam106_f_m_aM            | 0/1;0/0;0/1         |                     |
| chr2 | 202034999 | 202034999 | C | T | FZD7     | exonic   | nonsynonymous SNV | FZD7:NM_003507:exon1:c.C352T:p.P118S                                                                                                                                                                                                                                                                                                                                                                                                                                                                                                                                                                                             | 2.117 | .        | 6.98E-06             | Fam36_f_m_aM_uM          | 0/1;0/0;0/1;0/0     |                     |
| chr2 | 202520142 | 202520142 | G | A | BMPR2    | exonic   | nonsynonymous SNV | BMPR2:NM_001204:exon7:c.G908A:p.R303H                                                                                                                                                                                                                                                                                                                                                                                                                                                                                                                                                                                            | 1.147 | 0.0001   | 4.94E-05             | Fam88_f_m_aF             | 0/1;0/0;0/1         |                     |
| chr2 | 202552887 | 202552887 | C | T | BMPR2    | exonic   | nonsynonymous SNV | BMPR2:NM_001204:exon11:c.C1585T:p.R529C                                                                                                                                                                                                                                                                                                                                                                                                                                                                                                                                                                                          | 1.263 | 9.80E-05 | 6.98E-06             | Fam35_f_m_aF_uM          | 0/1;0/0;0/1;0/0     |                     |
| chr2 | 209976983 | 209976983 | G | A | UNC80    | exonic   | nonsynonymous SNV | UNC80:NM_032504:exon57:c.G8645A:p.R2882Q,UNC80:NM_182587:exon57:c.G8630A:p.R2877Q                                                                                                                                                                                                                                                                                                                                                                                                                                                                                                                                                | 1.12  | .        | 6.98E-06             | Fam120_f_m_aM_aM         | 0/0;0/1;0/1;0/1     |                     |
| chr2 | 209978684 | 209978684 | C | T | UNC80    | exonic   | nonsynonymous SNV | UNC80:NM_032504:exon58:c.C8896T:p.R2966W,UNC80:NM_182587:exon58:c.C8881T:p.R2961W                                                                                                                                                                                                                                                                                                                                                                                                                                                                                                                                                | 1.076 | 0.0006   | 0.0001               | 6.98E-06                 | Fam43_f_m_aM        | 0/0;0/1;0/1         |
| chr2 | 216660707 | 216660707 | A | G | IGFBP2   | exonic   | nonsynonymous SNV | IGFBP2:NM_000597:exon2:c.A593G:p.Q198R,IGFBP2:NM_001313990:exon2:c.A161G:p.Q54R,IGFBP2:NM_001313992:exon2:c.A95G:p.Q32R,IGFBP2:NM_001313993:exon2:c.A95G:p.Q32R                                                                                                                                                                                                                                                                                                                                                                                                                                                                  | 1.69  | .        | Fam83_f_m_aF         | 0/0;0/1;0/1              |                     |                     |
| chr2 | 218266493 | 218266493 | G | A | AAMP     | exonic   | nonsynonymous SNV | AAMP:NM_001087:exon5:c.C629T:p.T210I,AAMP:NM_001302545:exon5:c.C632T:p.T211I                                                                                                                                                                                                                                                                                                                                                                                                                                                                                                                                                     | 1.407 | .        | Fam56_f_m_aF_aM      | 0/1;0/0;0/1;0/1          |                     |                     |
| chr2 | 219418678 | 219418678 | C | A | DES      | exonic   | nonsynonymous SNV | DES:NM_001927:exon1:c.C216A:p.S72R                                                                                                                                                                                                                                                                                                                                                                                                                                                                                                                                                                                               | 1.734 | 0.0003   | 7.68E-05             | Fam67_f_m_aM_uF          | 0/1;0/0;0/1;0/1     |                     |
| chr2 | 219469011 | 219469011 | T | C | SPEG     | exonic   | nonsynonymous SNV | SPEG:NM_005876:exon12:c.T3454C:p.Y1152H                                                                                                                                                                                                                                                                                                                                                                                                                                                                                                                                                                                          | 1.9   | .        | 6.98E-06             | Fam60_f_m_aF             | 0/1;0/0;0/1         |                     |
| chr2 | 219469158 | 219469158 | C | T | SPEG     | exonic   | nonsynonymous SNV | SPEG:NM_005876:exon13:c.C3494T:p.S1165L                                                                                                                                                                                                                                                                                                                                                                                                                                                                                                                                                                                          | 1.509 | 0.0001   | 6.55E-05             | 4.19E-05                 | Fam22_f_m_aF_aF_uF  | 0/0;0/1;0/1;0/1;0/0 |
| chr2 | 219483098 | 219483098 | C | T | SPEG     | exonic   | nonsynonymous SNV | SPEG:NM_005876:exon30:c.C5635T:p.R1879C                                                                                                                                                                                                                                                                                                                                                                                                                                                                                                                                                                                          | 1.615 | 0.0003   | 0.0005               | 0.0002                   | Fam118_f_m_aM_aF_uM | 0/0;0/1;0/1;0/1;0/0 |
| chr2 | 219506398 | 219506398 | C | A | GMPPA    | exonic   | nonsynonymous SNV | GMPPA:NM_013335:exon12:c.C1138A:p.L380M,GMPPA:NM_205847:exon12:c.C1138A:p.L380M                                                                                                                                                                                                                                                                                                                                                                                                                                                                                                                                                  | 1.178 | .        | Fam86_f_m_aF         | 0/1;0/0;0/1              |                     |                     |

|      |           |           |   |   |           |        |                   |                                                                                                                                                                                                                                                                                                                                                                                              |       |          |          |                    |                     |                     |                 |
|------|-----------|-----------|---|---|-----------|--------|-------------------|----------------------------------------------------------------------------------------------------------------------------------------------------------------------------------------------------------------------------------------------------------------------------------------------------------------------------------------------------------------------------------------------|-------|----------|----------|--------------------|---------------------|---------------------|-----------------|
| chr2 | 219531821 | 219531821 | C | T | ASIC4     | exonic | nonsynonymous SNV | ASIC4:NM_018674:exon2:c.C1027T:p.R343W,ASIC4:NM_182847:exon2:c.C1027T:p.R343W                                                                                                                                                                                                                                                                                                                | 1.001 | 7.84E-05 | 0.0001   | Fam51_f_m_aM_uF    | 0/1;0/0;0/1;0/1     |                     |                 |
| chr2 | 219570911 | 219570911 | C | T | OBSL1     | exonic | nonsynonymous SNV | OBSL1:NM_001173408:exon1:c.G322A:p.D108N,OBSL1:NM_001173431:exon1:c.G322A:p.D108N,OBSL1:NM_015311:exon1:c.G322A:p.D108N                                                                                                                                                                                                                                                                      | 1.287 |          |          | Fam12_f_m_aM_uM_aM | 0/1;0/0;0/0;0/1;0/1 |                     |                 |
| chr2 | 219571203 | 219571203 | G | C | OBSL1     | exonic | nonsynonymous SNV | OBSL1:NM_001173408:exon1:c.C30G:p.S10R,OBSL1:NM_001173431:exon1:c.C30G:p.S10R,OBSL1:NM_015311:exon1:c.C30G:p.S10R                                                                                                                                                                                                                                                                            | 1.562 |          |          | Fam82_f_m_aM_uF    | 0/0;0/1;0/1;0/0     |                     |                 |
| chr2 | 222220315 | 222220315 | G | A | PAX3      | exonic | nonsynonymous SNV | PAX3:NM_001127366:exon7:c.C995T:p.P332L,PAX3:NM_181457:exon7:c.C998T:p.P333L,PAX3:NM_181458:exon7:c.C998T:p.P333L,PAX3:NM_181459:exon7:c.C998T:p.P333L,PAX3:NM_181460:exon7:c.C998T:p.P333L,PAX3:NM_181461:exon7:c.C998T:p.P333L                                                                                                                                                             | 1.325 | 6.55E-05 | 6.98E-06 | Fam12_f_m_aM_uM_aM | 0/1;0/0;0/1;0/0;0/0 |                     |                 |
| chr2 | 223991844 | 223991844 | T | C | SERPINE2  | exonic | nonsynonymous SNV | SERPINE2:NM_001136528:exon4:c.A644G:p.Y215C,SERPINE2:NM_001136530:exon4:c.A680G:p.Y227C,SERPINE2:NM_006216:exon4:c.A644G:p.Y215C                                                                                                                                                                                                                                                             | 1.12  | 9.89E-05 |          | Fam9_f_m_aM_dM_uF  | 0/1;0/0;0/1;0/0;0/1 |                     |                 |
| chr2 | 229418193 | 229418193 | - |   | TCAT DNER | exonic | stopgain          | DNER:NM_139072:exon9:c.1523_1524insATGA:p.C509*                                                                                                                                                                                                                                                                                                                                              | 0.562 |          |          | Fam122_f_m_aM      | 0/0;0/1;0/1         |                     |                 |
| chr2 | 231397747 | 231397747 | C | T | B3GNT7    | exonic | nonsynonymous SNV | B3GNT7:NM_145236:exon2:c.C28T:p.R10W                                                                                                                                                                                                                                                                                                                                                         | 1.285 | 7.73E-05 |          | Fam96_f_m_aM_uF    | 0/0;0/1;0/1;0/1     |                     |                 |
| chr2 | 232263211 | 232263211 | T | G | DIS3L2    | exonic | nonsynonymous SNV | DIS3L2:NM_001257281:exon13:c.T1430G:p.L477R,DIS3L2:NM_152383:exon13:c.T1430G:p.L477R                                                                                                                                                                                                                                                                                                         | 1.009 | 7.34E-05 | 0.0001   | 0.0002             | Fam115_f_m_aF_aM_aF | 0/1;0/0;0/1;0/0;0/1 |                 |
| chr2 | 232768789 | 232768789 | C | T | KCNJ13    | exonic | nonsynonymous SNV | KCNJ13:NM_001172417:exon3:c.G245A:p.R82Q,KCNJ13:NM_002242:exon3:c.G485A:p.R162Q                                                                                                                                                                                                                                                                                                              | 1.536 |          | 0.0007   | 0.0001             | Fam98_f_m_aM        | 0/1;0/0;0/1         |                 |
| chr2 | 233060513 | 233060513 | G | A | INPP5D    | exonic | nonsynonymous SNV | INPP5D:NM_001017915:exon1:c.G35A:p.R12H,INPP5D:NM_005541:exon1:c.G35A:p.R12H                                                                                                                                                                                                                                                                                                                 | 3.005 |          |          | 6.98E-06           | Fam68_f_m_aF_uF_uM  | 0/1;0/0;0/1;0/0;0/1 |                 |
| chr2 | 233204413 | 233204413 | G | A | INPP5D    | exonic | nonsynonymous SNV | INPP5D:NM_001017915:exon26:c.G3263A:p.C1088Y,INPP5D:NM_005541:exon26:c.G3260A:p.C1087Y                                                                                                                                                                                                                                                                                                       | 1.007 |          |          |                    | Fam66_f_m_aM        | 0/1;0/0;0/1         |                 |
| chr2 | 233464251 | 233464251 | C | T | DGKD      | exonic | nonsynonymous SNV | DGKD:NM_003648:exon26:c.C3142T:p.L1048F,DGKD:NM_152879:exon27:c.C3274T:p.L1092F                                                                                                                                                                                                                                                                                                              | 1.286 | 0.0004   | 0.0005   | 0.0002             | Fam16_f_m_aM_aM     | 0/0;0/1;0/1;0/0     |                 |
| chr2 | 235717639 | 235717639 | C | T | AGAP1     | exonic | nonsynonymous SNV | AGAP1:NM_001037131:exon3:c.C305T:p.P102L,AGAP1:NM_001244888:exon3:c.C305T:p.P102L,AGAP1:NM_014914:exon3:c.C305T:p.P102L                                                                                                                                                                                                                                                                      | 1.262 |          | 1.16E-05 | 6.98E-06           | Fam107_f_m_aM       | 0/1;0/0;0/1         |                 |
| chr2 | 236120347 | 236120347 | G | T | AGAP1     | exonic | nonsynonymous SNV | AGAP1:NM_014914:exon16:c.G2111T:p.R704L,AGAP1:NM_001037131:exon17:c.G2270T:p.R757L                                                                                                                                                                                                                                                                                                           | 1.374 |          | 5.71E-05 | 2.79E-05           | Fam44_f_m_aM_uF     | 0/0;0/1;0/1;0/0     |                 |
| chr2 | 236123941 | 236123941 | G | A | AGAP1     | exonic | nonsynonymous SNV | AGAP1:NM_014914:exon17:c.G2234A:p.R745Q,AGAP1:NM_001037131:exon18:c.G2393A:p.R798Q                                                                                                                                                                                                                                                                                                           | 1.347 | 0.0004   | 0.0008   | 0.0004             | Fam52_f_m_aM        | 0/0;0/1;0/1         |                 |
| chr2 | 236123941 | 236123941 | G | A | AGAP1     | exonic | nonsynonymous SNV | AGAP1:NM_014914:exon17:c.G2234A:p.R745Q,AGAP1:NM_001037131:exon18:c.G2393A:p.R798Q                                                                                                                                                                                                                                                                                                           | 1.347 | 0.0004   | 0.0008   | 0.0004             | Fam72_f_m_aF_uF     | 0/0;0/1;0/1;0/0     |                 |
| chr2 | 236214616 | 236214616 | C | T | ASB18     | exonic | nonsynonymous SNV | ASB18:NM_212556:exon4:c.G847A:p.G283R                                                                                                                                                                                                                                                                                                                                                        | 1.834 | 0.0003   |          | 0.0002             | Fam67_f_m_aM_uF     | 0/0;0/1;0/1;0/1     |                 |
| chr2 | 236237719 | 236237719 | A | G | ASB18     | exonic | nonsynonymous SNV | ASB18:NM_212556:exon3:c.T566C:p.L189P                                                                                                                                                                                                                                                                                                                                                        | 2.798 |          |          |                    | Fam55_f_m_aM_aM_dM  | 0/1;0/0;0/1;0/1;0/0 |                 |
| chr2 | 238239095 | 238239095 | C | T | HE56      | exonic | nonsynonymous SNV | HE56:NM_001142853:exon4:c.G401A:p.R134H,HE56:NM_018645:exon4:c.G407A:p.R136H                                                                                                                                                                                                                                                                                                                 | 1.518 |          | 3.47E-05 | 1.40E-05           | Fam39_f_m_aM        | 0/1;0/0;0/1         |                 |
| chr2 | 238848286 | 238848286 | G | A | TWIST2    | exonic | nonsynonymous SNV | TWIST2:NM_001271893:exon1:c.G71A:p.R24K,TWIST2:NM_057179:exon1:c.G71A:p.R24K                                                                                                                                                                                                                                                                                                                 | 1.619 | 7.37E-05 | 4.64E-05 | 2.10E-05           | Fam11_f_m_aM_uM     | 0/1;0/0;0/1;0/1     |                 |
| chr2 | 239189859 | 239189859 | C | T | HDAC4     | exonic | nonsynonymous SNV | HDAC4:NM_006037:exon4:c.G313A:p.E105K                                                                                                                                                                                                                                                                                                                                                        | 1.346 |          |          |                    | 6.98E-06            | Fam96_f_m_aM_uF     | 0/0;0/1;0/1;0/0 |
| chr2 | 240723546 | 240723546 | C | T | KIF1A     | exonic | nonsynonymous SNV | KIF1A:NM_004321:exon40:c.G4028A:p.R1343Q,KIF1A:NM_001320705:exon41:c.G4055A:p.R1352Q,KIF1A:NM_001330290:exon41:c.G4130A:p.R1377Q,KIF1A:NM_001244008:exon42:c.G4331A:p.R1444Q,KIF1A:NM_001330289:exon42:c.G4082A:p.R1361Q                                                                                                                                                                     | 1.377 |          | 1.92E-05 |                    | Fam117_f_m_aM_aF    | 0/1;0/0;0/1;0/1     |                 |
| chr2 | 240746168 | 240746168 | C | T | KIF1A     | exonic | nonsynonymous SNV | KIF1A:NM_004321:exon28:c.G2770A:p.E924K,KIF1A:NM_001320705:exon29:c.G2797A:p.E933K,KIF1A:NM_001330289:exon29:c.G2797A:p.E933K,KIF1A:NM_001330290:exon29:c.G2872A:p.E958K,KIF1A:NM_001244008:exon30:c.G3073A:p.E1025K                                                                                                                                                                         | 1.372 |          | 0.0003   |                    | Fam116_f_m_aM_aF    | 0/0;0/1;0/1;0/1     |                 |
| chr2 | 240998853 | 240998853 | G | C | SNED1     | exonic | nonsynonymous SNV | SNED1:NM_001080437:exon1:c.G16C:p.A6P                                                                                                                                                                                                                                                                                                                                                        | 2.287 | 0.0002   |          | 5.66E-05           | Fam83_f_m_aF        | 0/1;0/0;0/1         |                 |
| chr2 | 241182653 | 241182653 | G | A | PPP1R7    | exonic | nonsynonymous SNV | PPP1R7:NM_001282409:exon9:c.G784A:p.D262N,PPP1R7:NM_001282413:exon9:c.G736A:p.D246N,PPP1R7:NM_001282412:exon10:c.G865A:p.D289N,PPP1R7:NM_002712:exon10:c.G913A:p.D305N                                                                                                                                                                                                                       | 1.802 |          | 3.28E-05 |                    | Fam6_f_m_aM         | 0/0;0/1;0/1         |                 |
| chr2 | 241495666 | 241495666 | C | T | STK25     | exonic | nonsynonymous SNV | STK25:NM_001271978:exon11:c.G1277A:p.R426H,STK25:NM_001271979:exon11:c.G1046A:p.R349H,STK25:NM_001271980:exon11:c.G1046A:p.R349H,STK25:NM_001282305:exon11:c.G995A:p.R332H,STK25:NM_001282307:exon11:c.G995A:p.R332H,STK25:NM_001282308:exon11:c.G995A:p.R332H,STK25:NM_001271977:exon12:c.G1277A:p.R426H,STK25:NM_001282306:exon12:c.G1055A:p.R352H,STK25:NM_006374:exon12:c.G1277A:p.R426H | 1.858 | 0.0004   | 0.0002   | 0.0001             | Fam74_f_m_aM_uM     | 0/1;0/0;0/1;0/0     |                 |
| chr2 | 241559533 | 241559533 | C | T | BOK       | exonic | nonsynonymous SNV | BOK:NM_032515:exon2:c.C50T:p.A17V                                                                                                                                                                                                                                                                                                                                                            | 1.302 |          |          |                    | Fam91_m_aM_dM_aM_dM | 0/1;0/0;0/1;0/1;0/1 |                 |
| chr2 | 241678528 | 241678528 | T | C | DTYMK     | exonic | nonsynonymous SNV | DTYMK:NM_001320902:exon3:c.A323G:p.Y108C,DTYMK:NM_001320903:exon3:c.A289G:p.M97V,DTYMK:NM_001165031:exon4:c.A380G:p.Y127C,DTYMK:NM_001320904:exon4:c.A395G:p.Y132C,DTYMK:NM_012145:exon4:c.A452G:p.Y151C,DTYMK:NM_001320905:exon5:c.A569G:p.Y190C                                                                                                                                            | 1.075 | 1.12E-05 | 1.40E-05 |                    | Fam49_f_m_aM        | 0/1;0/0;0/1         |                 |
| chr2 | 241742460 | 241742460 | G | A | D2HGDH    | exonic | nonsynonymous SNV | D2HGDH:NM_152783:exon4:c.G376A:p.V126M                                                                                                                                                                                                                                                                                                                                                       | 1.172 | 0.0003   | 3.30E-05 | 2.79E-05           | Fam87_f_m_aM_uM     | 0/0;0/0;0/1;0/0     |                 |
| chr2 | 241804132 | 241804132 | A | C | GAL3ST2   | exonic | nonsynonymous SNV | GAL3ST2:NM_022134:exon4:c.A1163C:p.K388T                                                                                                                                                                                                                                                                                                                                                     | 1.365 |          | 0.0003   | 3.49E-05           | Fam44_f_m_aM_uF     | 0/0;0/1;0/1;0/0     |                 |
| chr2 | 241804132 | 241804132 | A | C | GAL3ST2   | exonic | nonsynonymous SNV | GAL3ST2:NM_022134:exon4:c.A1163C:p.K388T                                                                                                                                                                                                                                                                                                                                                     | 1.365 |          | 0.0003   | 3.49E-05           | Fam28_f_m_aF_uF     | 0/1;0/0;0/1;0/0     |                 |

|       |          |          |   |   |         |        |                     |                                                                                                                                                                                                                                               |       |          |          |          |                      |                     |
|-------|----------|----------|---|---|---------|--------|---------------------|-----------------------------------------------------------------------------------------------------------------------------------------------------------------------------------------------------------------------------------------------|-------|----------|----------|----------|----------------------|---------------------|
| chr20 | 604598   | 604598   | C | T | TCF15   | exonic | nonsynonymous SNV   | TCF15:NM_004609:exon2:c.G593A:p.R198Q                                                                                                                                                                                                         | 1.331 | .        | .        | 2.09E-05 | Fam52_f_m_aM         | 0/1;0/0;0/1         |
| chr20 | 663779   | 663779   | C | G | SCRT2   | exonic | nonsynonymous SNV   | SCRT2:NM_033129:exon2:c.G816C:p.Q272H                                                                                                                                                                                                         | 1.231 | 0.0004   | 0.0005   | 0.0002   | Fam18_f_m_aM_uF      | 0/1;0/0;0/1;0/1     |
| chr20 | 2102068  | 2102068  | T | C | STK35   | exonic | nonsynonymous SNV   | STK35:NM_080836:exon1:c.T187C:p.S63P                                                                                                                                                                                                          | 1.681 | .        | .        | .        | Fam113_f_m_aF_raM_uF | 0/0;0/1;0/1;0/0;0/0 |
| chr20 | 2988403  | 2988403  | G | A | PTPRA   | exonic | nonsynonymous SNV   | PTPRA:NM_080840:exon8:c.G640A:p.V214M,PTPRA:NM_080841:exon8:c.G640A:p.V214M,PTPRA:NM_002836:exon13:c.G667A:p.V223M                                                                                                                            | 1.518 | 0.0003   | 0.0002   | 9.77E-05 | Fam55_f_m_aM_aM_dM   | 0/0;0/1;0/0;0/1;0/1 |
| chr20 | 3164518  | 3164518  | T | C | LZTS3   | exonic | nonsynonymous SNV   | LZTS3:NM_001365618:exon5:c.A1958G:p.H653R,LZTS3:NM_001367609:exon5:c.A2048G:p.H683R,LZTS3:NM_001282533:exon6:c.A1820G:p.H607R                                                                                                                 | 1.524 | .        | .        | 6.98E-06 | Fam95_f_m_aM_aM_uF   | 0/0;0/1;0/1;0/1;0/1 |
| chr20 | 3230618  | 3230618  | G | C | SLC4A11 | exonic | nonsynonymous SNV   | SLC4A11:NM_001363745:exon11:c.C1198G:p.L400V,SLC4A11:NM_032034:exon11:c.C1360G:p.L454V,SLC4A11:NM_01174089:exon12:c.C1312G:p.L438V,SLC4A11:NM_001174090:exon12:c.C1441G:p.L481V                                                               | 1.001 | .        | .        | .        | Fam65_f_m_aM_uF_dF   | 0/1;0/0;0/1;0/0;0/1 |
| chr20 | 3540289  | 3540289  | G | A | ATRN    | exonic | nonsynonymous SNV   | ATRN:NM_001207047:exon3:c.G214A:p.V72I,ATRN:NM_001323332:exon3:c.G562A:p.V188I,ATRN:NM_139321:exon3:c.G562A:p.V188I,ATRN:NM_139322:exon3:c.G562A:p.V188I                                                                                      | 1.187 | .        | .        | .        | Fam12_f_m_aM_uM_aM   | 0/1;0/0;0/1;0/1;0/1 |
| chr20 | 3584059  | 3584059  | T | C | ATRN    | exonic | nonsynonymous SNV   | ATRN:NM_001207047:exon17:c.T2578C:p.W860R,ATRN:NM_001323332:exon17:c.T2926C:p.W976R,ATRN:NM_139321:exon17:c.T2926C:p.W976R,ATRN:NM_139322:exon17:c.T2926C:p.W976R                                                                             | 1.962 | .        | .        | .        | Fam91_m_aM_dM_aM_dM  | 0/1;0/0;0/1;0/1;0/1 |
| chr20 | 3661142  | 3661142  | C | A | GFRA4   | exonic | nonsynonymous SNV   | GFRA4:NM_022139:exon2:c.G194T:p.R65L,GFRA4:NM_145762:exon2:c.G194T:p.R65L                                                                                                                                                                     | 1.054 | 0.0002   | .        | 2.11E-05 | Fam69_f_m_aM         | 0/0;0/1;0/1         |
| chr20 | 3673480  | 3673480  | G | C | ADAM33  | exonic | nonsynonymous SNV   | ADAM33:NM_001282447:exon11:c.C1007G:p.P336R,ADAM33:NM_025220:exon11:c.C1007G:p.P336R,ADAM33:NM_153202:exon11:c.C1007G:p.P336R                                                                                                                 | 1.854 | .        | .        | .        | Fam31_f_m_aM_uF      | 0/0;0/1;0/1;0/1     |
| chr20 | 3745068  | 3745068  | A | G | HSPA12B | exonic | nonsynonymous SNV   | HSPA12B:NM_001318322:exon4:c.A175G:p.M59V,HSPA12B:NM_001197327:exon5:c.A433G:p.M145V,HSPA12B:NM_052970:exon5:c.A433G:p.M145V                                                                                                                  | 1.835 | .        | .        | .        | Fam48_f_m_aM_uM      | 0/0;0/1;0/1;0/0     |
| chr20 | 3785046  | 3785046  | C | A | CENPB   | exonic | nonsynonymous SNV   | CENPB:NM_001810:exon1:c.G1438T:p.V480L                                                                                                                                                                                                        | 1.437 | 7.36E-05 | 3.28E-05 | 6.98E-06 | Fam64_f_m_aM         | 0/1;0/0;0/1         |
| chr20 | 4790537  | 4790537  | G | A | RASSF2  | exonic | nonsynonymous SNV   | RASSF2:NM_170774:exon6:c.C451T:p.R151C,RASSF2:NM_014737:exon7:c.C451T:p.R151C                                                                                                                                                                 | 1.353 | .        | 0.0004   | 1.40E-05 | Fam116_f_m_aM_aF     | 0/1;0/0;0/1;0/0     |
| chr20 | 5184929  | 5184929  | G | A | CDS2    | exonic | nonsynonymous SNV   | CDS2:NM_003818:exon8:c.G743A:p.R248Q                                                                                                                                                                                                          | 2.798 | .        | 2.23E-05 | .        | Fam99_f_m_aM_aM      | 0/1;0/0;0/0;0/1     |
| chr20 | 5558719  | 5558719  | T | C | GPCPD1  | exonic | nonsynonymous SNV   | GPCPD1:NM_019593:exon18:c.A1633G:p.I545V                                                                                                                                                                                                      | 1.103 | 7.35E-05 | 0.0003   | 4.89E-05 | Fam44_f_m_aM_uF      | 0/0;0/1;0/1;0/0     |
| chr20 | 5580074  | 5580074  | C | T | GPCPD1  | exonic | nonsynonymous SNV   | GPCPD1:NM_019593:exon7:c.G407A:p.R136H                                                                                                                                                                                                        | 1.463 | .        | .        | .        | Fam54_f_m_aM_uF      | 0/0;0/1;0/1;0/0     |
| chr20 | 8740398  | 8740398  | C | T | PLCB1   | exonic | nonsynonymous SNV   | PLCB1:NM_015192:exon22:c.C2363T:p.A788V,PLCB1:NM_182734:exon22:c.C2363T:p.A788V                                                                                                                                                               | 1.132 | .        | .        | .        | Fam101_f_m_aM        | 0/1;0/0;0/1         |
| chr20 | 10643817 | 10643817 | C | T | JAG1    | exonic | nonsynonymous SNV   | JAG1:NM_000214:exon20:c.G2419A:p.E807K                                                                                                                                                                                                        | 1.392 | .        | 3.28E-05 | .        | Fam24_f_m_aM_aM      | 0/1;0/0;0/1;0/1     |
| chr20 | 11922786 | 11922786 | C | G | BTBD3   | exonic | nonsynonymous SNV   | BTBD3:NM_001282552:exon4:c.C236G:p.S79C,BTBD3:NM_001282554:exon4:c.C236G:p.S79C,BTBD3:NM_014962:exon4:c.C689G:p.S230C,BTBD3:NM_001282550:exon5:c.C506G:p.S169C,BTBD3:NM_001282551:exon5:c.C506G:p.S169C,BTBD3:NM_181443:exon5:c.C818G:p.S273C | 1.283 | .        | .        | .        | Fam75_f_m_aM         | 0/0;0/1;0/1         |
| chr20 | 13630022 | 13630022 | C | G | TASP1   | exonic | nonsynonymous SNV   | TASP1:NM_001323602:exon2:c.G57C:p.Q19H,TASP1:NM_017714:exon2:c.G57C:p.Q19H                                                                                                                                                                    | 1.387 | .        | 5.59E-05 | .        | Fam85_f_m_aM_aM      | 0/0;0/1;0/1;0/0     |
| chr20 | 16506085 | 16506085 | G | T | KIF16B  | exonic | nonsynonymous SNV   | KIF16B:NM_001199865:exon8:c.C805A:p.L269I,KIF16B:NM_001199866:exon8:c.C805A:p.L269I,KIF16B:NM_024704:exon8:c.C805A:p.L269I                                                                                                                    | 1.408 | .        | .        | 2.10E-05 | Fam17_f_m_aM_uM      | 0/1;0/0;0/1;0/0     |
| chr20 | 17735795 | 17735795 | G | T | BANF2   | exonic | nonsynonymous SNV   | BANF2:NM_001014977:exon3:c.G257T:p.C86F,BANF2:NM_001159495:exon3:c.G278T:p.C93F,BANF2:NM_178477:exon4:c.G257T:p.C86F                                                                                                                          | 1.017 | .        | .        | .        | Fam113_f_m_aF_raM_uF | 0/0;0/0;0/0;0/1;0/0 |
| chr20 | 19684188 | 19684188 | G | A | SLC24A3 | exonic | nonsynonymous SNV   | SLC24A3:NM_020689:exon11:c.G914A:p.R305H                                                                                                                                                                                                      | 1.081 | 0.0003   | 0.0007   | 0.0002   | Fam6_f_m_aM          | 0/0;0/1;0/1         |
| chr20 | 20052656 | 20052656 | C | - | CRNKL1  | exonic | frameshift deletion | CRNKL1:NM_001278625:exon2:c.134delG:p.G45Dfs*83,CRNKL1:NM_016652:exon2:c.170delG:p.G57Dfs*83                                                                                                                                                  | 0.445 | .        | .        | .        | Fam57_f_m_aM_uF      | 0/1;0/0;0/1;0/1     |
| chr20 | 23036115 | 23036115 | T | C | SSTR4   | exonic | nonsynonymous SNV   | SSTR4:NM_001052:exon1:c.T632C:p.F211S                                                                                                                                                                                                         | 1.735 | 7.35E-05 | 1.14E-05 | 6.98E-06 | Fam65_f_m_aM_uF_dF   | 0/0;0/1;0/1;0/0;0/0 |
| chr20 | 23036388 | 23036388 | C | G | SSTR4   | exonic | nonsynonymous SNV   | SSTR4:NM_001052:exon1:c.C905G:p.A302G                                                                                                                                                                                                         | 1.111 | .        | .        | 6.98E-06 | Fam110_f_m_aM_aM_uMs | 0/0;0/1;0/0;0/1;0/0 |
| chr20 | 23354275 | 23354275 | G | C | NXT1    | exonic | nonsynonymous SNV   | NXT1:NM_013248:exon2:c.G234C:p.Q78H                                                                                                                                                                                                           | 1.802 | .        | 1.12E-05 | .        | Fam50_f_m_aF         | 0/0;0/1;0/1         |
| chr20 | 23637679 | 23637679 | T | C | CST3    | exonic | nonsynonymous SNV   | CST3:NM_000099:exon1:c.A184G:p.K62E,CST3:NM_00128614:exon1:c.A184G:p.K62E                                                                                                                                                                     | 1.248 | .        | 2.16E-05 | 6.98E-06 | Fam48_f_m_aM_uM      | 0/1;0/0;0/1;0/0     |
| chr20 | 25030885 | 25030885 | C | A | ACSS1   | exonic | nonsynonymous SNV   | ACSS1:NM_001252676:exon2:c.G142T:p.A48S,ACSS1:NM_001252675:exon3:c.G505T:p.A169S,ACSS1:NM_001252677:exon3:c.G505T:p.A169S,ACSS1:NM_032501:exon3:c.G505T:p.A169S                                                                               | 1.298 | .        | .        | 6.98E-06 | Fam6_f_m_aM          | 0/0;0/1;0/1         |
| chr20 | 25030891 | 25030891 | G | T | ACSS1   | exonic | nonsynonymous SNV   | ACSS1:NM_001252676:exon2:c.C136A:p.R46S,ACSS1:NM_001252675:exon3:c.C499A:p.R167S,ACSS1:NM_001252677:exon3:c.C499A:p.R167S,ACSS1:NM_032501:exon3:c.C499A:p.R167S                                                                               | 1.551 | .        | .        | .        | Fam115_f_m_aF_aM_aF  | 0/0;0/1;0/1;0/0;0/0 |

|       |          |          |   |   |          |        |                   |                                                                                                                                                                                                                                                                                                                                                                                                                                                                                                                                                                                                                                                                                                                                                                                                                                                                                                                                                                                                                                                |       |          |          |          |                     |                     |
|-------|----------|----------|---|---|----------|--------|-------------------|------------------------------------------------------------------------------------------------------------------------------------------------------------------------------------------------------------------------------------------------------------------------------------------------------------------------------------------------------------------------------------------------------------------------------------------------------------------------------------------------------------------------------------------------------------------------------------------------------------------------------------------------------------------------------------------------------------------------------------------------------------------------------------------------------------------------------------------------------------------------------------------------------------------------------------------------------------------------------------------------------------------------------------------------|-------|----------|----------|----------|---------------------|---------------------|
| chr20 | 25218579 | 25218579 | G | A | ENTPD6   | exonic | nonsynonymous SNV | ENTPD6:NM_001322381:exon7:c.G254A:p.R85H,ENTPD6:NM_001322382:exon7:c.G254A:p.R85H,ENTPD6:NM_001322379:exon8:c.G254A:p.R85H,ENTPD6:NM_001322380:exon8:c.G254A:p.R85H,ENTPD6:NM_001322384:exon8:c.G254A:p.R85H,ENTPD6:NM_001322385:exon8:c.G713A:p.R238H,ENTPD6:NM_001114089:exon9:c.G857A:p.R286H,ENTPD6:NM_001322386:exon9:c.G857A:p.R286H,ENTPD6:NM_01322387:exon9:c.G764A:p.R255H,ENTPD6:NM_001322389:exon9:c.G899A:p.R300H,ENTPD6:NM_001322392:exon9:c.G854A:p.R285H,ENTPD6:NM_001322393:exon9:c.G857A:p.R286H,ENTPD6:NM_001322394:exon9:c.G854A:p.R285H,ENTPD6:NM_001322395:exon9:c.G899A:p.R300H,ENTPD6:NM_001322398:exon9:c.G899A:p.R300H,ENTPD6:NM_001247:exon10:c.G908A:p.R303H,ENTPD6:NM_001317941:exon10:c.G905A:p.R302H,ENTPD6:NM_001322378:exon10:c.G908A:p.R303H,ENTPD6:NM_001322388:exon10:c.G908A:p.R303H,ENTPD6:NM_001322391:exon10:c.G908A:p.R303H,ENTPD6:NM_001322396:exon10:c.G905A:p.R302H,ENTPD6:NM_001322397:exon10:c.G908A:p.R303H,ENTPD6:NM_001322383:exon11:c.G254A:p.R85H,ENTPD6:NM_001322390:exon11:c.G908A:p.R303H | 1.005 | 0.0009   | 0.001    | 0.0007   | Fam70_f_m_aM        | 0/0;0/1;0/1         |
| chr20 | 32019096 | 32019096 | G | T | CCM2L    | exonic | nonsynonymous SNV | CCM2L:NM_001365692:exon5:c.G620T:p.W207L,CCM2L:NM_008625:exon5:c.G620T:p.W207L                                                                                                                                                                                                                                                                                                                                                                                                                                                                                                                                                                                                                                                                                                                                                                                                                                                                                                                                                                 | 1.221 |          |          | 0.0001   | Fam32_f_m_aM_uM     | 0/1;0/0;0/1;0/1     |
| chr20 | 32431426 | 32431426 | C | A | ASXL1    | exonic | nonsynonymous SNV | ASXL1:NM_001363734:exon7:c.C641A:p.A214D,ASXL1:NM_015338:exon8:c.C824A:p.A275D                                                                                                                                                                                                                                                                                                                                                                                                                                                                                                                                                                                                                                                                                                                                                                                                                                                                                                                                                                 | 2.057 |          |          |          | Fam53_f_m_aM        | 0/1;0/0;0/1         |
| chr20 | 33359046 | 33359046 | G | C | CDK5RAP1 | exonic | nonsynonymous SNV | CDK5RAP1:NM_001278168:exon13:c.C1530G:p.C510W,CDK5RAP1:NM_001278167:exon14:c.C1758G:p.C586W,CDK5RAP1:NM_001278169:exon14:c.C1680G:p.C560W,CDK5RAP1:NM_016082:exon14:c.C1764G:p.C588W,CDK5RAP1:NM_016408:exon14:c.C1761G:p.C587W,CDK5RAP1:NM_001365728:exon15:c.C1803G:p.C601W                                                                                                                                                                                                                                                                                                                                                                                                                                                                                                                                                                                                                                                                                                                                                                  | 1.043 | 7.34E-05 |          | 7.68E-05 | Fam115_f_m_aF_aM_aF | 0/1;0/0;0/0;0/1;0/0 |
| chr20 | 33667511 | 33667511 | C | T | ACTL10   | exonic | nonsynonymous SNV | ACTL10:NM_001024675:exon1:c.C14T:p.A5V                                                                                                                                                                                                                                                                                                                                                                                                                                                                                                                                                                                                                                                                                                                                                                                                                                                                                                                                                                                                         | 1.078 |          |          |          | Fam97_f_m_aM_aF     | 0/1;0/0;0/1;0/0     |
| chr20 | 33676818 | 33676818 | C | T | E2F1     | exonic | nonsynonymous SNV | E2F1:NM_005225:exon7:c.G1228A:p.D410N                                                                                                                                                                                                                                                                                                                                                                                                                                                                                                                                                                                                                                                                                                                                                                                                                                                                                                                                                                                                          | 1.51  | 7.36E-05 | 3.55E-05 | 1.40E-05 | Fam15_f_m_aM_aM     | 0/1;0/0;0/1;0/1     |
| chr20 | 35619687 | 35619687 | C | T | SPAG4    | exonic | nonsynonymous SNV | SPAG4:NM_001317931:exon10:c.C787T:p.P263S,SPAG4:NM_003116:exon10:c.C1018T:p.P340S                                                                                                                                                                                                                                                                                                                                                                                                                                                                                                                                                                                                                                                                                                                                                                                                                                                                                                                                                              | 1.355 |          |          | 6.73E-05 | Fam11_f_m_aM_uM     | 0/1;0/0;0/1;0/1     |
| chr20 | 35931414 | 35931414 | A | G | PHF20    | exonic | nonsynonymous SNV | PHF20:NM_016436:exon15:c.A2270G:p.H757R                                                                                                                                                                                                                                                                                                                                                                                                                                                                                                                                                                                                                                                                                                                                                                                                                                                                                                                                                                                                        | 1.311 | 7.34E-05 | 2.23E-05 | 6.98E-06 | Fam38_f_m_aM        | 0/0;0/1;0/1         |
| chr20 | 36432021 | 36432021 | G | A | DLGAP4   | exonic | nonsynonymous SNV | DLGAP4:NM_001365621:exon3:c.G304A:p.A102T,DLGAP4:NM_014902:exon3:c.G304A:p.A102T                                                                                                                                                                                                                                                                                                                                                                                                                                                                                                                                                                                                                                                                                                                                                                                                                                                                                                                                                               | 1.389 | 0.0006   | 0.0003   | 0.0001   | Fam66_f_m_aM        | 0/1;0/0;0/1         |
| chr20 | 36432063 | 36432063 | C | T | DLGAP4   | exonic | nonsynonymous SNV | DLGAP4:NM_001365621:exon3:c.C346T:p.R116C,DLGAP4:NM_014902:exon3:c.C346T:p.R116C                                                                                                                                                                                                                                                                                                                                                                                                                                                                                                                                                                                                                                                                                                                                                                                                                                                                                                                                                               | 1.732 |          | 0.0001   | 3.49E-05 | Fam23_f_m_aM_dF_uFs | 0/0;0/1;0/1;0/1;0/1 |
| chr20 | 36500309 | 36500309 | C | A | DLGAP4   | exonic | nonsynonymous SNV | DLGAP4:NM_001042486:exon4:c.C89A:p.T30N,DLGAP4:NM_183006:exon4:c.C593A:p.T198N,DLGAP4:NM_001365621:exon10:c.C2210A:p.T737N,DLGAP4:NM_014902:exon10:c.C2201A:p.T734N                                                                                                                                                                                                                                                                                                                                                                                                                                                                                                                                                                                                                                                                                                                                                                                                                                                                            | 1.184 |          | 1.12E-05 |          | Fam91_m_aM_dM_aM_dM | 0/1;0/1;0/0;0/0;0/0 |
| chr20 | 37254297 | 37254297 | C | T | GHRH     | exonic | nonsynonymous SNV | GHRH:NM_001184731:exon3:c.G221A:p.R74Q,GHRH:NM_021081:exon3:c.G221A:p.R74Q                                                                                                                                                                                                                                                                                                                                                                                                                                                                                                                                                                                                                                                                                                                                                                                                                                                                                                                                                                     | 1.132 |          | 0.0006   |          | Fam103_f_m_aM       | 0/1;0/0;0/1         |
| chr20 | 38509160 | 38509160 | A | T | RALGAPB  | exonic | nonsynonymous SNV | RALGAPB:NM_001282917:exon6:c.A824T:p.D275V,RALGAPB:NM_001282918:exon6:c.A824T:p.D275V,RALGAPB:NM_020336:exon6:c.A824T:p.D275V                                                                                                                                                                                                                                                                                                                                                                                                                                                                                                                                                                                                                                                                                                                                                                                                                                                                                                                  | 1.551 |          | 1.12E-05 |          | Fam21_f_m_aM_uM     | 0/0;0/1;0/1;0/0     |
| chr20 | 38539810 | 38539810 | G | A | RALGAPB  | exonic | nonsynonymous SNV | RALGAPB:NM_001282917:exon17:c.G2414A:p.R805Q,RALGAPB:NM_001282918:exon17:c.G2402A:p.R801Q,RALGAPB:NM_020336:exon17:c.G2414A:p.R805Q                                                                                                                                                                                                                                                                                                                                                                                                                                                                                                                                                                                                                                                                                                                                                                                                                                                                                                            | 1.381 |          | 0.0008   | 1.40E-05 | Fam97_f_m_aM_aF     | 0/1;0/0;0/1;0/0     |
| chr20 | 38889597 | 38889597 | C | T | PPP1R16B | exonic | nonsynonymous SNV | PPP1R16B:NM_001172735:exon3:c.C253T:p.R85C,PPP1R16B:NM_015568:exon3:c.C253T:p.R85C                                                                                                                                                                                                                                                                                                                                                                                                                                                                                                                                                                                                                                                                                                                                                                                                                                                                                                                                                             | 1.581 |          | 4.47E-05 |          | Fam26_f_m_aM_uM     | 0/1;0/0;0/1;0/1     |
| chr20 | 41491815 | 41491815 | C | T | CHD6     | exonic | nonsynonymous SNV | CHD6:NM_032221:exon11:c.G1319A:p.R440Q                                                                                                                                                                                                                                                                                                                                                                                                                                                                                                                                                                                                                                                                                                                                                                                                                                                                                                                                                                                                         | 2.436 |          | 1.12E-05 |          | Fam90_f_m_aF_dM     | 0/1;0/0;0/1;0/0     |
| chr20 | 42677943 | 42677943 | C | T | PTPRT    | exonic | nonsynonymous SNV | PTPRT:NM_007050:exon7:c.G1076A:p.R359Q,PTPRT:NM_133170:exon7:c.G1076A:p.R359Q                                                                                                                                                                                                                                                                                                                                                                                                                                                                                                                                                                                                                                                                                                                                                                                                                                                                                                                                                                  | 1.203 |          | 3.28E-05 | 1.40E-05 | Fam72_f_m_aF_uF     | 0/0;0/0;0/1;0/0     |
| chr20 | 44279074 | 44279074 | G | A | GDAP1L1  | exonic | nonsynonymous SNV | GDAP1L1:NM_001256740:exon4:c.G665A:p.G222D,GDAP1L1:NM_001256739:exon5:c.G704A:p.G235D,GDAP1L1:NM_001256737:exon6:c.G935A:p.G312D,GDAP1L1:NM_001256738:exon6:c.G611A:p.G204D,GDAP1L1:NM_024034:exon6:c.G878A:p.G293D                                                                                                                                                                                                                                                                                                                                                                                                                                                                                                                                                                                                                                                                                                                                                                                                                            | 1.57  |          | 3.28E-05 | 6.98E-06 | Fam36_f_m_aM_uM     | 0/0;0/1;0/1;0/0     |
| chr20 | 44306716 | 44306716 | G | A | FITM2    | exonic | nonsynonymous SNV | FITM2:NM_001080472:exon2:c.C698T:p.T233I                                                                                                                                                                                                                                                                                                                                                                                                                                                                                                                                                                                                                                                                                                                                                                                                                                                                                                                                                                                                       | 1.236 |          | 0.0001   | 0.0002   | Fam75_f_m_aM        | 0/1;0/0;0/1         |
| chr20 | 44311115 | 44311115 | G | A | FITM2    | exonic | nonsynonymous SNV | FITM2:NM_001080472:exon1:c.C34T:p.R12W,HNF4A:NM_000457:exon7:c.C787T:p.R263W,HNF4A:NM_01030003:exon7:c.C721T:p.R241W,HNF4A:NM_001030004:exon7:c.C721T:p.R241W,HNF4A:NM_175914:exon7:c.C721T:p.R241W,HNF4A:NM_178849:exon7:c.C787T:p.R263W,HNF4A:NM_178850:exon7:c.C787T:p.R263W,HNF4A:NM_01258355:exon8:c.C766T:p.R256W,HNF4A:NM_001287182:exon8:c.C712T:p.R238W,HNF4A:NM_001287183:exon8:c.C712T:p.R238W,HNF4A:NM_001287184:exon8:c.C712T:p.R238W                                                                                                                                                                                                                                                                                                                                                                                                                                                                                                                                                                                             | 1.169 |          |          |          | Fam87_f_m_aM_uM     | 0/1;0/0;0/1;0/0     |
| chr20 | 44419771 | 44419771 | C | T | HNF4A    | exonic | nonsynonymous SNV | HNF4A:NM_178850:exon7:c.C787T:p.R263W,HNF4A:NM_01258355:exon8:c.C766T:p.R256W,HNF4A:NM_001287182:exon8:c.C712T:p.R238W,HNF4A:NM_001287183:exon8:c.C712T:p.R238W,HNF4A:NM_001287184:exon8:c.C712T:p.R238W                                                                                                                                                                                                                                                                                                                                                                                                                                                                                                                                                                                                                                                                                                                                                                                                                                       | 1.003 |          | 1.12E-05 | 1.40E-05 | Fam99_f_m_aM_aM     | 0/1;0/0;0/0;0/1     |
| chr20 | 44480246 | 44480246 | C | T | TTPAL    | exonic | nonsynonymous SNV | TTPAL:NM_001039199:exon2:c.C247T:p.R83C,TTPAL:NM_001261839:exon2:c.C247T:p.R83C,TTPAL:NM_024333:exon3:c.C247T:p.R83C                                                                                                                                                                                                                                                                                                                                                                                                                                                                                                                                                                                                                                                                                                                                                                                                                                                                                                                           | 1.393 |          | 9.81E-05 | 1.40E-05 | Fam22_f_m_aF_aF_uF  | 0/0;0/1;0/1;0/1;0/1 |
| chr20 | 45301137 | 45301137 | C | A | MATN4    | exonic | nonsynonymous SNV | MATN4:NM_030590:exon4:c.G731T:p.G244W,MATN4:NM_003833:exon6:c.G854T:p.G285V                                                                                                                                                                                                                                                                                                                                                                                                                                                                                                                                                                                                                                                                                                                                                                                                                                                                                                                                                                    | 1.415 |          |          |          | Fam80_f_m_aM_uM     | 0/0;0/1;0/1;0/0     |

|       |          |          |    |   |          |          |                      |                                                                                                                                                                                                                                                                                                                                                                                                                                                                                                                                                                                                                                                                                       |       |          |          |          |                     |                     |                     |
|-------|----------|----------|----|---|----------|----------|----------------------|---------------------------------------------------------------------------------------------------------------------------------------------------------------------------------------------------------------------------------------------------------------------------------------------------------------------------------------------------------------------------------------------------------------------------------------------------------------------------------------------------------------------------------------------------------------------------------------------------------------------------------------------------------------------------------------|-------|----------|----------|----------|---------------------|---------------------|---------------------|
| chr20 | 45304434 | 45304434 | G  | T | MATN4    | exonic   | nonsynonymous SNV    | MATN4:NM_030590:exon3:c.C437A:p.T146K,MATN4:NM_030592:exon3:c.C437A:p.T146K,MATN4:NM_003833:exon4:c.C437A:p.T146K                                                                                                                                                                                                                                                                                                                                                                                                                                                                                                                                                                     | 1.403 | .        | .        | .        | .                   | Fam95_f_m_aM_aM_uF  | 0/1;0/0;0/1;0/1;0/1 |
| chr20 | 45947372 | 45947372 | G  | A | PCIF1    | exonic   | nonsynonymous SNV    | PCIF1:NM_022104:exon16:c.G1817A:p.R606H                                                                                                                                                                                                                                                                                                                                                                                                                                                                                                                                                                                                                                               | 1.663 | .        | 0.0002   | .        | .                   | Fam26_f_m_aM_uM     | 0/0;0/1;0/1;0/1     |
| chr20 | 46041382 | 46041382 | C  | A | SLC12A5  | exonic   | nonsynonymous SNV    | SLC12A5:NM_001134771:exon8:c.C977A:p.A326D,SLC12A5:NM_020708:exon8:c.C908A:p.A303D                                                                                                                                                                                                                                                                                                                                                                                                                                                                                                                                                                                                    | 2.044 | .        | .        | .        | .                   | Fam94_f_m_aM        | 0/1;0/0;0/1         |
| chr20 | 46065076 | 46065076 | T  | C | NCOA5    | exonic   | nonsynonymous SNV    | NCOA5:NM_001348148:exon5:c.A467G:p.Q156R,NCOA5:NM_001348148:exon5:c.A467G:p.Q156R,NCOA5:NM_001348149:exon6:c.A782G:p.Q261R,NCOA5:NM_020967:exon6:c.A782G:p.Q261R,NCOA5:NM_001348150:exon7:c.A593G:p.Q198R                                                                                                                                                                                                                                                                                                                                                                                                                                                                             | 1.17  | .        | .        | .        | .                   | Fam112_f_m_aM       | 0/1;0/0;0/1         |
| chr20 | 47180820 | 47180820 | A  | G | EYA2     | exonic   | nonsynonymous SNV    | EYA2:NM_005244:exon14:c.A1319G:p.N4405                                                                                                                                                                                                                                                                                                                                                                                                                                                                                                                                                                                                                                                | 1.709 | .        | .        | .        | .                   | Fam80_f_m_aM_uM     | 0/1;0/0;0/1;0/1     |
| chr20 | 47294721 | 47294721 | A  | G | ZMYND8   | exonic   | nonsynonymous SNV    | ZMYND8:NM_001281771:exon5:c.T437C:p.I146T,ZMYND8:NM_001281775:exon5:c.T512C:p.I171T,ZMYND8:NM_001281777:exon5:c.T512C:p.I171T,ZMYND8:NM_001281777:exon5:c.T437C:p.I146T,ZMYND8:NM_001281778:exon5:c.T437C:p.I146T,ZMYND8:NM_001281781:exon5:c.T437C:p.I146T,ZMYND8:NM_001281782:exon5:c.T437C:p.I146T,ZMYND8:NM_001281783:exon5:c.T512C:p.I171T,ZMYND8:NM_01281784:exon5:c.T437C:p.I146T,ZMYND8:NM_001363714:exon5:c.T533C:p.I178T,ZMYND8:NM_012408:exon5:c.T512C:p.I171T,ZMYND8:NM_183047:exon5:c.T512C:p.I171T,ZMYND8:NM_183048:exon5:c.T437C:p.I146T,ZMYND8:NM_001281773:exon6:c.T452C:p.I151T,ZMYND8:NM_001363741:exon6:c.T452C:p.I151T,ZMYND8:NM_001281772:exon7:c.T452C:p.I151T | 1.403 | 0.0003   | 0.0001   | 4.19E-05 | Fam106_f_m_aM       | 0/0;0/1;0/1         |                     |
| chr20 | 48636584 | 48636584 | C  | T | PREX1    | exonic   | nonsynonymous SNV    | PREX1:NM_020820:exon32:c.G4046A:p.R1349H                                                                                                                                                                                                                                                                                                                                                                                                                                                                                                                                                                                                                                              | 1.204 | 0.0003   | 0.001    | 0.0003   | Fam118_f_m_aM_aF_uM | 0/0;0/1;0/1;0/1;0/1 |                     |
| chr20 | 48649548 | 48649548 | C  | A | PREX1    | exonic   | nonsynonymous SNV    | PREX1:NM_020820:exon25:c.G3057T:p.Q1019H                                                                                                                                                                                                                                                                                                                                                                                                                                                                                                                                                                                                                                              | 1     | .        | .        | .        | Fam69_f_m_aM        | 0/0;0/1;0/1         |                     |
| chr20 | 49023106 | 49023106 | A  | G | ARFGF2   | exonic   | nonsynonymous SNV    | ARFGF2:NM_006420:exon35:c.A4680G:p.I1560M                                                                                                                                                                                                                                                                                                                                                                                                                                                                                                                                                                                                                                             | 1.265 | .        | .        | .        | Fam45_f_m_aM_uF     | 0/0;0/1;0/1;0/0     |                     |
| chr20 | 49270740 | 49270740 | T  | A | ZNFX1    | exonic   | nonsynonymous SNV    | ZNFX1:NM_021035:exon3:c.A1072T:p.I358F                                                                                                                                                                                                                                                                                                                                                                                                                                                                                                                                                                                                                                                | 1.09  | .        | .        | .        | Fam68_f_m_aF_uF_uM  | 0/1;0/0;0/1;0/0;0/0 |                     |
| chr20 | 50191112 | 50191112 | G  | A | CEBPB    | exonic   | nonsynonymous SNV    | CEBPB:NM_001285878:exon1:c.G10A:p.A4T,CEBPB:NM_005194:exon1:c.G79A:p.A27T                                                                                                                                                                                                                                                                                                                                                                                                                                                                                                                                                                                                             | 1.937 | .        | 4.02E-05 | .        | Fam94_f_m_aM        | 0/0;0/1;0/1         |                     |
| chr20 | 51671187 | 51671187 | C  | T | ATP9A    | exonic   | nonsynonymous SNV    | ATP9A:NM_006045:exon12:c.G1108A:p.G370R                                                                                                                                                                                                                                                                                                                                                                                                                                                                                                                                                                                                                                               | 1.837 | 0.0002   | 0.0001   | 0.0003   | Fam84_f_m_aF        | 0/1;0/0;0/1         |                     |
| chr20 | 51791947 | 51791947 | G  | C | SALL4    | exonic   | nonsynonymous SNV    | SALL4:NM_001318031:exon2:c.C536G:p.T179S,SALL4:NM_020436:exon2:c.C536G:p.T179S                                                                                                                                                                                                                                                                                                                                                                                                                                                                                                                                                                                                        | 1.018 | .        | 6.17E-05 | .        | Fam24_f_m_aM_aM     | 0/1;0/0;0/1;0/1     |                     |
| chr20 | 56631590 | 56631590 | G  | C | TFAP2C   | exonic   | nonsynonymous SNV    | TFAP2C:NM_003222:exon2:c.G434C:p.R145P                                                                                                                                                                                                                                                                                                                                                                                                                                                                                                                                                                                                                                                | 2.077 | .        | .        | .        | Fam53_f_m_aM        | 0/1;0/0;0/1         |                     |
| chr20 | 56637775 | 56637775 | C  | G | TFAP2C   | exonic   | nonsynonymous SNV    | TFAP2C:NM_003222:exon7:c.C1115G:p.P372R                                                                                                                                                                                                                                                                                                                                                                                                                                                                                                                                                                                                                                               | 2.1   | .        | .        | .        | Fam89_f_m_aM        | 0/0;0/1;0/1         |                     |
| chr20 | 57171059 | 57171059 | G  | A | BMP7     | exonic   | nonsynonymous SNV    | BMP7:NM_001719:exon7:c.C1196T:p.T399M                                                                                                                                                                                                                                                                                                                                                                                                                                                                                                                                                                                                                                                 | 1.743 | .        | .        | .        | Fam15_f_m_aM_aM     | 0/1;0/0;0/1;0/1     |                     |
| chr20 | 57173297 | 57173297 | G  | A | BMP7     | exonic   | nonsynonymous SNV    | BMP7:NM_001719:exon6:c.C1049T:p.A350V                                                                                                                                                                                                                                                                                                                                                                                                                                                                                                                                                                                                                                                 | 1.706 | .        | 2.23E-05 | 6.98E-06 | Fam74_f_m_aM_uM     | 0/1;0/0;0/1;0/1     |                     |
| chr20 | 57228290 | 57228290 | G  | C | BMP7     | exonic   | nonsynonymous SNV    | BMP7:NM_001719:exon2:c.C550G:p.R184G                                                                                                                                                                                                                                                                                                                                                                                                                                                                                                                                                                                                                                                  | 1.379 | 7.35E-05 | 0.0001   | 2.79E-05 | Fam92_f_m_aM        | 0/1;0/0;0/1         |                     |
| chr20 | 57652300 | 57652300 | C  | T | PMEPA1   | exonic   | nonsynonymous SNV    | PMEPA1:NM_001255976:exon4:c.G533A:p.C178Y,PMEPA1:NM_020182:exon4:c.G617A:p.C206Y,PMEPA1:NM_199169:exon4:c.G512A:p.C171Y,PMEPA1:NM_199170:exon4:c.G467A:p.C156Y,PMEPA1:NM_199171:exon4:c.G467A:p.C156Y                                                                                                                                                                                                                                                                                                                                                                                                                                                                                 | 1.919 | .        | .        | .        | Fam94_f_m_aM        | 0/1;0/0;0/1         |                     |
| chr20 | 58461398 | 58461398 | G  | A | APCDD1L  | exonic   | nonsynonymous SNV    | APCDD1L:NM_153360:exon4:c.C898T:p.R300W,APCDD1L:NM_001304787:exon5:c.C931T:p.R311W                                                                                                                                                                                                                                                                                                                                                                                                                                                                                                                                                                                                    | 1.048 | .        | 3.86E-05 | 1.40E-05 | Fam29_f_m_aF_uM     | 0/1;0/0;0/1;0/1     |                     |
| chr20 | 62012909 | 62012909 | C  | T | TAF4     | exonic   | nonsynonymous SNV    | TAF4:NM_003185:exon3:c.G1547A:p.R516Q                                                                                                                                                                                                                                                                                                                                                                                                                                                                                                                                                                                                                                                 | 1.459 | .        | 1.12E-05 | .        | Fam94_f_m_aM        | 0/0;0/1;0/1         |                     |
| chr20 | 62014567 | 62014567 | C  | T | TAF4     | exonic   | nonsynonymous SNV    | TAF4:NM_003185:exon2:c.G1501A:p.V501I                                                                                                                                                                                                                                                                                                                                                                                                                                                                                                                                                                                                                                                 | 1.452 | .        | 3.30E-05 | 6.99E-06 | Fam119_f_m_aM_aM    | 0/0;0/1;0/1;0/1     |                     |
| chr20 | 62218601 | 62218601 | C  | T | HRH3     | exonic   | nonsynonymous SNV    | HRH3:NM_007232:exon2:c.G307A:p.G103S                                                                                                                                                                                                                                                                                                                                                                                                                                                                                                                                                                                                                                                  | 1.242 | .        | 0.0006   | 0.0001   | Fam27_f_m_aF_uM_uM  | 0/1;0/0;0/1;0/1;0/0 |                     |
| chr20 | 62279303 | 62279303 | C  | T | OSBPL2   | exonic   | nonsynonymous SNV    | OSBPL2:NM_001278649:exon7:c.C362T:p.A121V,OSBPL2:NM_014835:exon7:c.C602T:p.A201V,OSBPL2:NM_144498:exon7:c.C638T:p.A213V,OSBPL2:NM_001363878:exon8:c.C362T:p.A121V                                                                                                                                                                                                                                                                                                                                                                                                                                                                                                                     | 1.578 | .        | 1.12E-05 | .        | Fam80_f_m_aM_uM     | 0/1;0/0;0/1;0/1     |                     |
| chr20 | 62289231 | 62289231 | G  | A | OSBPL2   | exonic   | nonsynonymous SNV    | OSBPL2:NM_014835:exon12:c.G1114A:p.V372M,OSBPL2:NM_144498:exon12:c.G1150A:p.V384M,OSBPL2:NM_001363878:exon13:c.G874A:p.V292M                                                                                                                                                                                                                                                                                                                                                                                                                                                                                                                                                          | 1.562 | .        | 0.0002   | .        | Fam98_f_m_aM        | 0/0;0/1;0/1         |                     |
| chr20 | 62475060 | 62475060 | C  | G | GATA5    | exonic   | nonsynonymous SNV    | GATA5:NM_080473:exon2:c.G462C:p.W154C                                                                                                                                                                                                                                                                                                                                                                                                                                                                                                                                                                                                                                                 | 2.914 | .        | .        | 1.40E-05 | Fam31_f_m_aM_uF     | 0/1;0/0;0/1;0/0     |                     |
| chr20 | 62760080 | 62760080 | C  | G | NTSR1    | exonic   | nonsynonymous SNV    | NTSR1:NM_002531:exon4:c.C1070G:p.S357C                                                                                                                                                                                                                                                                                                                                                                                                                                                                                                                                                                                                                                                | 1.012 | .        | .        | .        | Fam46_f_m_aM_uM     | 0/1;0/0;0/1;0/1     |                     |
| chr20 | 62799453 | 62799454 | CA | - | MIRGBP   | splicing | .                    | .                                                                                                                                                                                                                                                                                                                                                                                                                                                                                                                                                                                                                                                                                     | 0.575 | .        | .        | .        | Fam53_f_m_aM        | 0/1;0/0;0/1         |                     |
| chr20 | 62881698 | 62881698 | C  | G | DIDO1    | exonic   | nonsynonymous SNV    | DIDO1:NM_001193369:exon16:c.G4258C:p.E1420Q,DIDO1:NM_033081:exon16:c.G4258C:p.E1420Q                                                                                                                                                                                                                                                                                                                                                                                                                                                                                                                                                                                                  | 1.158 | .        | 9.80E-05 | 6.98E-06 | Fam90_f_m_aF_dM     | 0/0;0/1;0/1;0/1     |                     |
| chr20 | 62962697 | 62962697 | G  | A | SLC17A9  | exonic   | nonsynonymous SNV    | SLC17A9:NM_022082:exon5:c.G571A:p.G1915,SLC17A9:NM_001302643:exon6:c.G553A:p.G185S                                                                                                                                                                                                                                                                                                                                                                                                                                                                                                                                                                                                    | 1.285 | 7.35E-05 | 3.28E-05 | 1.40E-05 | Fam5_f_m_aM         | 0/1;0/0;0/1         |                     |
| chr20 | 63433803 | 63433803 | -  | G | KCNQ2    | exonic   | frameshift insertion | KCNQ2:NM_172109:exon8:c.1123dupC:p.R375Pfs*30                                                                                                                                                                                                                                                                                                                                                                                                                                                                                                                                                                                                                                         | 0.44  | .        | .        | .        | Fam60_f_m_aF        | 0/1;0/0;0/1         |                     |
| chr20 | 63862115 | 63862115 | C  | T | ABHD16B  | exonic   | nonsynonymous SNV    | ABHD16B:NM_080622:exon1:c.C575T:p.P192L                                                                                                                                                                                                                                                                                                                                                                                                                                                                                                                                                                                                                                               | 1.392 | 7.36E-05 | 8.03E-05 | 6.98E-05 | Fam123_f_aF         | 0/1;0/1             |                     |
| chr20 | 63862133 | 63862133 | C  | G | ABHD16B  | exonic   | nonsynonymous SNV    | ABHD16B:NM_080622:exon1:c.C593G:p.S198C                                                                                                                                                                                                                                                                                                                                                                                                                                                                                                                                                                                                                                               | 1.36  | .        | 4.62E-05 | 6.98E-06 | Fam11_f_m_aM_uM     | 0/1;0/0;0/1;0/1     |                     |
| chr20 | 64076559 | 64076559 | A  | G | RGS19    | exonic   | nonsynonymous SNV    | RGS19:NM_001039467:exon3:c.T118C:p.C40R,RGS19:NM_005873:exon3:c.T118C:p.C40R                                                                                                                                                                                                                                                                                                                                                                                                                                                                                                                                                                                                          | 1.36  | .        | 1.13E-05 | .        | Fam54_f_m_aM_uF     | 0/0;0/1;0/1;0/1     |                     |
| chr20 | 64083391 | 64083391 | C  | G | LKAAEAR1 | exonic   | nonsynonymous SNV    | LKAAEAR1:NM_001007125:exon2:c.G717C:p.K239N                                                                                                                                                                                                                                                                                                                                                                                                                                                                                                                                                                                                                                           | 1.057 | .        | 1.19E-05 | .        | Fam60_f_m_aF        | 0/1;0/0;0/1         |                     |

|       |          |          |      |   |          |        |                      |                                                                                                                                                                                                                                                                                                                                        |       |   |          |          |                              |                     |
|-------|----------|----------|------|---|----------|--------|----------------------|----------------------------------------------------------------------------------------------------------------------------------------------------------------------------------------------------------------------------------------------------------------------------------------------------------------------------------------|-------|---|----------|----------|------------------------------|---------------------|
| chr20 | 64092938 | 64092938 | T    | G | OPRL1    | exonic | nonsynonymous SNV    | OPRL1:NM_001318854:exon1:c.T218G;p.M73R,OPRL1:NM_001318855:exon1:c.T103G;p.C35G,OPRL1:NM_000913:exon2:c.T218G;p.M73R,OPRL1:NM_182647:exon3:c.T218G;p.M73R,OPRL1:NM_001200019:exon4:c.T218G;p.M73R                                                                                                                                      | 1.345 | . | .        | .        | Fam42_f_m_aM_uF              | 0/1;0/0;0/1;0/1     |
| chr21 | 14964725 | 14964728 | TTCT | - | NR1P1    | exonic | frameshift deletion  | NR1P1:NM_003489:exon4:c.3465_3468del;p.K1155Nfs*15                                                                                                                                                                                                                                                                                     | 0.489 | . | 0.0006   | 0.0004   | 0.0001 Fam64_f_m_aM          | 0/0;0/1;0/1         |
| chr21 | 25745266 | 25745266 | A    | G | GABPA    | exonic | nonsynonymous SNV    | GABPA:NM_001197297:exon3:c.A134G;p.N455,GABPA:NM_002040:exon3:c.A134G;p.N455                                                                                                                                                                                                                                                           | 1.045 | . | .        | 7.46E-05 | 4.19E-05 Fam106_f_m_aM       | 0/0;0/1;0/1         |
| chr21 | 26837739 | 26837739 | C    | T | ADAMTS1  | exonic | nonsynonymous SNV    | ADAMTS1:NM_006988:exon9:c.G2744A;p.G915E                                                                                                                                                                                                                                                                                               | 1.037 | . | 7.35E-05 | 3.28E-05 | 1.40E-05 Fam32_f_m_aM_uM     | 0/1;0/0;0/1;0/1     |
| chr21 | 32741605 | 32741605 | -    | A | PAXBP1   | exonic | frameshift insertion | PAXBP1:NM_013329:exon16:c.2351dupT;p.Q785Pfs*69                                                                                                                                                                                                                                                                                        | 0.442 | . | .        | .        | Fam85_f_m_aM_aM              | 0/0;0/1;0/1;0/1     |
| chr21 | 33283199 | 33283199 | G    | A | IL10RB   | exonic | nonsynonymous SNV    | IL10RB:NM_000628:exon5:c.G604A;p.G202R                                                                                                                                                                                                                                                                                                 | 1.171 | . | .        | 1.12E-05 | Fam100_f_m_aF                | 0/0;0/1;0/1         |
| chr21 | 34095505 | 34095505 | C    | T | SLC5A3   | exonic | nonsynonymous SNV    | SLC5A3:NM_006933:exon2:c.C307T;p.R103W                                                                                                                                                                                                                                                                                                 | 1.3   | . | .        | 0.0002   | 6.29E-05 Fam106_f_m_aM       | 0/1;0/0;0/1         |
| chr21 | 37227657 | 37227657 | C    | T | VPS26C   | exonic | nonsynonymous SNV    | VPS26C:NM_001331018:exon4:c.G433A;p.V145M,VPS26C:NM_001331021:exon6:c.G664A;p.V222M,VPS26C:NM_001331022:exon6:c.G727A;p.V243M,VPS26C:NM_006052:exon7:c.G808A;p.V270M                                                                                                                                                                   | 1.358 | . | 0.0007   | 0.0009   | 0.0005 Fam53_f_m_aM          | 0/1;0/0;0/1         |
| chr21 | 38299719 | 38299719 | C    | T | KCNJ15   | exonic | nonsynonymous SNV    | KCNJ15:NM_001276438:exon3:c.C458T;p.T153M,KCNJ15:NM_170736:exon3:c.C458T;p.T153M,KCNJ15:NM_170737:exon3:c.C458T;p.T153M,KCNJ15:NM_001276437:exon4:c.C458T;p.T153M,KCNJ15:NM_001276439:exon4:c.C458T;p.T153M,KCNJ15:NM_002243:exon4:c.C458T;p.T153M,KCNJ15:NM_001276435:exon5:c.C458T;p.T153M,KCNJ15:NM_001276436:exon5:c.C458T;p.T153M | 1.34  | . | .        | .        | Fam115_f_m_aF_aM_aF          | 0/1;0/0;0/1;0/1;0/0 |
| chr21 | 39280235 | 39280235 | G    | C | BRWD1    | exonic | nonsynonymous SNV    | BRWD1:NM_018963:exon9:c.C845G;p.A282G,BRWD1:NM_033656:exon9:c.C845G;p.A282G                                                                                                                                                                                                                                                            | 1.454 | . | .        | 1.15E-05 | 6.98E-06 Fam52_f_m_aM        | 0/1;0/0;0/1         |
| chr21 | 40353548 | 40353548 | C    | T | DSCAM    | exonic | nonsynonymous SNV    | DSCAM:NM_001271534:exon5:c.G851A;p.R284H,DSCAM:NM_001389:exon5:c.G851A;p.R284H                                                                                                                                                                                                                                                         | 1.602 | . | 0.0006   | 0.0004   | 5.58E-05 Fam23_f_m_aM_dF_uFs | 0/1;0/0;0/1;0/1;0/0 |
| chr21 | 40369136 | 40369136 | C    | A | DSCAM    | exonic | nonsynonymous SNV    | DSCAM:NM_001271534:exon4:c.G618T;p.E206D,DSCAM:NM_001389:exon4:c.G618T;p.E206D                                                                                                                                                                                                                                                         | 1.399 | . | .        | .        | Fam120_f_m_aM_aM             | 0/0;0/1;0/0;0/1     |
| chr21 | 41257212 | 41257212 | G    | A | BACE2    | exonic | nonsynonymous SNV    | BACE2:NM_138991:exon7:c.G1039A;p.G347S,BACE2:NM_012105:exon8:c.G1189A;p.G397S                                                                                                                                                                                                                                                          | 1.428 | . | 7.34E-05 | 0.0002   | 7.68E-05 Fam56_f_m_aF_aM     | 0/0;0/1;0/1;0/0     |
| chr21 | 41756622 | 41756622 | G    | A | RIPK4    | exonic | nonsynonymous SNV    | RIPK4:NM_020639:exon2:c.C377T;p.A126V                                                                                                                                                                                                                                                                                                  | 1.254 | . | .        | 6.54E-05 | 6.98E-06 Fam72_f_m_aF_uF     | 0/1;0/0;0/1;0/0     |
| chr21 | 41756812 | 41756812 | G    | A | RIPK4    | exonic | nonsynonymous SNV    | RIPK4:NM_020639:exon2:c.C187T;p.R63C                                                                                                                                                                                                                                                                                                   | 1.496 | . | .        | 0.0001   | 6.98E-06 Fam123_f_aF         | 0/1;0/1             |
| chr21 | 42564785 | 42564785 | G    | A | SLC37A1  | exonic | nonsynonymous SNV    | SLC37A1:NM_001320537:exon14:c.G1213A;p.A405T,SLC37A1:NM_018964:exon15:c.G1213A;p.A405T                                                                                                                                                                                                                                                 | 1.145 | . | .        | 4.50E-05 | 6.98E-06 Fam106_f_m_aM       | 0/1;0/0;0/1         |
| chr21 | 42564786 | 42564786 | C    | A | SLC37A1  | exonic | nonsynonymous SNV    | SLC37A1:NM_001320537:exon14:c.C1214A;p.A405D,SLC37A1:NM_018964:exon15:c.C1214A;p.A405D                                                                                                                                                                                                                                                 | 1.464 | . | .        | 4.50E-05 | 6.98E-06 Fam106_f_m_aM       | 0/1;0/0;0/1         |
| chr21 | 43687996 | 43687996 | C    | T | RRP1B    | exonic | nonsynonymous SNV    | RRP1B:NM_015056:exon13:c.C1622T;p.A541V                                                                                                                                                                                                                                                                                                | 1.099 | . | .        | .        | Fam89_f_m_aM                 | 0/1;0/0;0/1         |
| chr21 | 43970678 | 43970678 | G    | A | AGPAT3   | exonic | nonsynonymous SNV    | AGPAT3:NM_001037553:exon5:c.G536A;p.R179H,AGPAT3:NM_001369878:exon5:c.G536A;p.R179H,AGPAT3:NM_001369880:exon5:c.G536A;p.R179H,AGPAT3:NM_001369881:exon6:c.G350A;p.R117H,AGPAT3:NM_020132:exon6:c.G536A;p.R179H                                                                                                                         | 2.243 | . | .        | .        | Fam17_f_m_aM_uM              | 0/0;0/0;0/1;0/0     |
| chr21 | 43970798 | 43970798 | G    | A | AGPAT3   | exonic | nonsynonymous SNV    | AGPAT3:NM_001037553:exon5:c.G656A;p.R219Q,AGPAT3:NM_001369878:exon5:c.G656A;p.R219Q,AGPAT3:NM_001369880:exon5:c.G656A;p.R219Q,AGPAT3:NM_001369881:exon6:c.G470A;p.R157Q,AGPAT3:NM_020132:exon6:c.G656A;p.R219Q                                                                                                                         | 1.105 | . | 7.36E-05 | 0.0001   | 4.89E-05 Fam116_f_m_aM_aF    | 0/1;0/0;0/1;0/0     |
| chr21 | 44457129 | 44457129 | T    | C | LRRC3    | exonic | nonsynonymous SNV    | LRRC3:NM_030891:exon2:c.T485C;p.L162P                                                                                                                                                                                                                                                                                                  | 1.193 | . | .        | .        | Fam63_f_m_aF                 | 0/0;0/1;0/1         |
| chr21 | 44771433 | 44771433 | G    | A | UBE2G2   | exonic | nonsynonymous SNV    | UBE2G2:NM_001202489:exon4:c.C232T;p.R78W,UBE2G2:NM_003343:exon6:c.C442T;p.R148W,UBE2G2:NM_182688:exon7:c.C358T;p.R120W                                                                                                                                                                                                                 | 2.099 | . | .        | 1.12E-05 | Fam117_f_m_aM_aF             | 0/0;0/1;0/0;0/1     |
| chr21 | 44890068 | 44890068 | C    | A | ITGB2    | exonic | nonsynonymous SNV    | ITGB2:NM_000211:exon12:c.G1567T;p.D523Y,ITGB2:NM_001127491:exon12:c.G1567T;p.D523Y,ITGB2:NM_001303238:exon12:c.G1360T;p.D454Y                                                                                                                                                                                                          | 1.172 | . | .        | .        | Fam59_f_m_aF_uM              | 0/0;0/1;0/1;0/0     |
| chr21 | 45531506 | 45531506 | A    | C | SLC19A1  | exonic | nonsynonymous SNV    | SLC19A1:NM_001205207:exon2:c.T712G;p.S238A,SLC19A1:NM_001205206:exon3:c.T832G;p.S278A,SLC19A1:NM_001352510:exon3:c.T478G;p.S160A,SLC19A1:NM_001352511:exon3:c.T832G;p.S278A,SLC19A1:NM_001352512:exon3:c.T832G;p.S278A,SLC19A1:NM_194255:exon3:c.T832G;p.S278A                                                                         | 1.517 | . | .        | .        | Fam38_f_m_aM                 | 0/0;0/1;0/1         |
| chr21 | 46554919 | 46554919 | C    | T | DIP2A    | exonic | nonsynonymous SNV    | DIP2A:NM_001146116:exon28:c.C3362T;p.T1121I,DIP2A:NM_001353942:exon28:c.C3377T;p.T1126I,DIP2A:NM_001353943:exon28:c.C3374T;p.T1125I,DIP2A:NM_015151:exon28:c.C3374T;p.T1125I                                                                                                                                                           | 1.738 | . | 0.0001   | 9.95E-05 | 7.68E-05 Fam68_f_m_aF_uF_uM  | 0/0;0/1;0/1;0/1;0/1 |
| chr21 | 46566608 | 46566608 | A    | G | DIP2A    | exonic | nonsynonymous SNV    | DIP2A:NM_001146116:exon37:c.A4376G;p.E1459G,DIP2A:NM_001353942:exon37:c.A4391G;p.E1464G,DIP2A:NM_001353943:exon37:c.A4388G;p.E1463G,DIP2A:NM_015151:exon37:c.A4388G;p.E1463G                                                                                                                                                           | 1.803 | . | .        | .        | Fam7_f_m_aM_aM_uM            | 0/1;0/0;0/0;0/1;0/1 |
| chr22 | 17818426 | 17818426 | A    | - | MICAL3   | exonic | frameshift deletion  | MICAL3:NM_015241:exon26:c.4235delT;p.L1412Hfs*26                                                                                                                                                                                                                                                                                       | 0.336 | . | .        | .        | Fam122_f_m_aM                | 0/1;0/0;0/1         |
| chr22 | 19447539 | 19447539 | G    | A | C22orf39 | exonic | nonsynonymous SNV    | C22orf39:NM_001166242:exon2:c.C142T;p.R48C,C22orf39:NM_173793:exon2:c.C142T;p.R48C                                                                                                                                                                                                                                                     | 1.213 | . | .        | 0.0001   | 6.98E-06 Fam78_f_m_aF_uM     | 0/1;0/0;0/1;0/1     |
| chr22 | 20139810 | 20139810 | C    | T | ZDHHC8   | exonic | nonsynonymous SNV    | ZDHHC8:NM_001185024:exon4:c.C475T;p.H159Y,ZDHHC8:NM_013373:exon4:c.C475T;p.H159Y                                                                                                                                                                                                                                                       | 2.287 | . | .        | .        | Fam37_f_m_aF_uM              | 0/1;0/0;0/1;0/0     |
| chr22 | 20464868 | 20464868 | G    | C | KLHL22   | exonic | nonsynonymous SNV    | KLHL22:NM_032775:exon4:c.C1102G;p.R368G                                                                                                                                                                                                                                                                                                | 1.29  | . | .        | 5.65E-05 | Fam56_f_m_aF_aM              | 0/1;0/0;0/0;0/1     |



|       |          |          |   |   |           |        |                   |                                                                                                                                                                                                                                                                                                                                                                                                         |       |          |          |          |                      |                     |
|-------|----------|----------|---|---|-----------|--------|-------------------|---------------------------------------------------------------------------------------------------------------------------------------------------------------------------------------------------------------------------------------------------------------------------------------------------------------------------------------------------------------------------------------------------------|-------|----------|----------|----------|----------------------|---------------------|
| chr22 | 20973823 | 20973823 | C | G | AIFM3     | exonic | nonsynonymous SNV | AIFM3:NM_001018060:exon4:c.C311G;p.A104G,AIFM3:NM_001146288:exon4:c.C329G;p.A110G,AIFM3:NM_144704:exon4:c.C311G;p.A104G                                                                                                                                                                                                                                                                                 | 1.119 | 7.35E-05 | 2.92E-05 | 5.59E-05 | Fam21_f_m_aM_uM      | 0/0;0/1;0/1;0/0     |
| chr22 | 20974736 | 20974736 | C | T | AIFM3     | exonic | nonsynonymous SNV | AIFM3:NM_001018060:exon8:c.C640T;p.R214W,AIFM3:NM_001146288:exon8:c.C658T;p.R220W,AIFM3:NM_144704:exon8:c.C640T;p.R214W                                                                                                                                                                                                                                                                                 | 1.136 | 7.36E-05 | 0.0001   | 9.77E-05 | Fam54_f_m_aM_uF      | 0/1;0/0;0/1;0/0     |
| chr22 | 20974800 | 20974800 | G | A | AIFM3     | exonic | nonsynonymous SNV | AIFM3:NM_001018060:exon8:c.G704A;p.R235H,AIFM3:NM_001146288:exon8:c.G722A;p.R241H,AIFM3:NM_144704:exon8:c.G704A;p.R235H                                                                                                                                                                                                                                                                                 | 1.245 |          | 0.0003   | 6.98E-06 | Fam119_f_m_aM_aM     | 0/1;0/0;0/1;0/1     |
| chr22 | 20979650 | 20979650 | G | T | AIFM3     | exonic | nonsynonymous SNV | AIFM3:NM_001018060:exon18:c.G1600T;p.V534F,AIFM3:NM_001146288:exon18:c.G1618T;p.V540F,AIFM3:NM_144704:exon18:c.G1600T;p.V534F                                                                                                                                                                                                                                                                           | 1.285 |          |          |          | Fam76_f_m_aM_uM      | 0/1;0/0;0/1;0/1     |
| chr22 | 21446079 | 21446079 | G | T | HIC2      | exonic | nonsynonymous SNV | HIC2:NM_015094:exon3:c.G1184T;p.C395F                                                                                                                                                                                                                                                                                                                                                                   | 1.683 |          |          |          | Fam84_f_m_aF         | 0/0;0/1;0/1         |
| chr22 | 21923264 | 21923264 | C | T | PPM1F     | exonic | nonsynonymous SNV | PPM1F:NM_014634:exon8:c.G1193A;p.R398Q                                                                                                                                                                                                                                                                                                                                                                  | 1.003 | 0.0004   | 0.0006   | 0.0002   | Fam29_f_m_aF_uM      | 0/0;0/1;0/1;0/0     |
| chr22 | 21957233 | 21957233 | G | A | TOP3B     | exonic | nonsynonymous SNV | TOP3B:NM_001282112:exon18:c.C2470T;p.R824C, TOP3B:NM_001282113:exon18:c.C2470T;p.R824C, TOP3B:NM_003935:exon18:c.C2470T;p.R824C, TOP3B:NM_001349845:exon19:c.C2470T;p.R824C, TOP3B:NM_001349847:exon19:c.C2470T;p.R824C, TOP3B:NM_001349848:exon19:c.C2062T;p.R688C, TOP3B:NM_001349850:exon20:c.C2062T;p.R688C                                                                                         | 3.328 |          | 0.0001   | 2.10E-05 | Fam91_m_aM_dM_aM_dM  | 0/1;0/1;0/1;0/0;0/1 |
| chr22 | 21959709 | 21959709 | C | A | TOP3B     | exonic | nonsynonymous SNV | TOP3B:NM_001282112:exon15:c.G1682T;p.R561L, TOP3B:NM_001282113:exon15:c.G1682T;p.R561L, TOP3B:NM_003935:exon15:c.G1682T;p.R561L, TOP3B:NM_001349845:exon16:c.G1682T;p.R561L, TOP3B:NM_001349847:exon16:c.G1682T;p.R561L, TOP3B:NM_001349848:exon16:c.G1274T;p.R425L, TOP3B:NM_001349851:exon16:c.G1274T;p.R425L, TOP3B:NM_001349850:exon17:c.G1274T;p.R425L, TOP3B:NM_001349852:exon17:c.G1274T;p.R425L | 1.517 |          |          |          | Fam112_f_m_aM        | 0/0;0/1;0/1         |
| chr22 | 23158001 | 23158001 | C | T | RAB36     | exonic | nonsynonymous SNV | RAB36:NM_001349878:exon7:c.C602T;p.T201M,RAB36:NM_004914:exon7:c.C602T;p.T201M,RAB36:NM_001349877:exon8:c.C674T;p.T225M                                                                                                                                                                                                                                                                                 | 1.261 | 7.34E-05 |          | 6.98E-06 | Fam113_f_m_aF_raM_uF | 0/1;0/0;0/1;0/0;0/1 |
| chr22 | 23767502 | 23767502 | T | C | CHCHD10   | exonic | nonsynonymous SNV | CHCHD10:NM_001301339:exon2:c.A133G;p.M45V,CHCHD10:NM_213720:exon2:c.A133G;p.M45V                                                                                                                                                                                                                                                                                                                        | 1.377 |          |          |          | Fam102_f_m_aM        | 0/1;0/0;0/1         |
| chr22 | 24050974 | 24050974 | C | T | CABIN1    | exonic | nonsynonymous SNV | CABIN1:NM_001199281:exon8:c.C806T;p.T269I,CABIN1:NM_012295:exon8:c.C806T;p.T269I                                                                                                                                                                                                                                                                                                                        | 1.004 | 0.0003   | 2.24E-05 | 6.98E-06 | Fam92_f_m_aM_raM     | 0/0;0/1;0/1;0/0     |
| chr22 | 24072451 | 24072451 | A | G | CABIN1    | exonic | nonsynonymous SNV | CABIN1:NM_001201429:exon17:c.A2423G;p.E808G,CABIN1:NM_001199281:exon18:c.A2573G;p.E858G,CABIN1:NM_012295:exon18:c.A2573G;p.E858G                                                                                                                                                                                                                                                                        | 1.044 | 7.35E-05 | 8.93E-05 | 7.68E-05 | Fam70_f_m_aM         | 0/0;0/1;0/1         |
| chr22 | 24113569 | 24113569 | G | A | CABIN1    | exonic | nonsynonymous SNV | CABIN1:NM_001201429:exon26:c.G3971A;p.R1324Q,CABIN1:NM_001199281:exon27:c.G4121A;p.R1374Q,CABIN1:NM_012295:exon27:c.G4121A;p.R1374Q                                                                                                                                                                                                                                                                     | 1.032 |          | 0.0001   | 6.28E-05 | Fam116_f_m_aM_aF     | 0/1;0/0;0/1;0/1     |
| chr22 | 26443105 | 26443105 | G | C | ASPHD2    | exonic | nonsynonymous SNV | ASPHD2:NM_020437:exon4:c.G1009C;p.E337Q                                                                                                                                                                                                                                                                                                                                                                 | 1.453 | 7.34E-05 | 0.0004   | 0.0001   | Fam109_f_m_aM        | 0/0;0/1;0/1         |
| chr22 | 29049289 | 29049289 | G | A | ZNRF3     | exonic | nonsynonymous SNV | ZNRF3:NM_001206998:exon8:c.G1108A;p.G370S,ZNRF3:NM_032173:exon8:c.G808A;p.G270S                                                                                                                                                                                                                                                                                                                         | 1.189 |          | 3.29E-05 |          | Fam17_f_m_aM_uM      | 0/0;0/1;0/1;0/1     |
| chr22 | 29480753 | 29480753 | G | A | NEFH      | exonic | nonsynonymous SNV | NEFH:NM_021076:exon1:c.G491A;p.R164H                                                                                                                                                                                                                                                                                                                                                                    | 1.325 |          |          |          | Fam47_f_m_aM         | 0/1;0/0;0/1         |
| chr22 | 29481098 | 29481098 | A | G | NEFH      | exonic | nonsynonymous SNV | NEFH:NM_021076:exon1:c.A836G;p.E279G                                                                                                                                                                                                                                                                                                                                                                    | 1.261 |          |          |          | Fam110_f_m_aM_aM_uMs | 0/1;0/0;0/1;0/1;0/0 |
| chr22 | 29528466 | 29528466 | T | C | THOC5     | exonic | nonsynonymous SNV | THOC5:NM_001002879:exon10:c.A926G;p.D309G,THOC5:NM_003678:exon10:c.A926G;p.D309G,THOC5:NM_001002877:exon11:c.A926G;p.D309G,THOC5:NM_001002878:exon11:c.A926G;p.D309G                                                                                                                                                                                                                                    | 1.331 |          |          |          | Fam37_f_m_aF_uM      | 0/1;0/0;0/1;0/0     |
| chr22 | 29531899 | 29531899 | G | A | THOC5     | exonic | nonsynonymous SNV | THOC5:NM_001002879:exon8:c.C779T;p.T260I,THOC5:NM_003678:exon8:c.C779T;p.T260I,THOC5:NM_001002877:exon9:c.C779T;p.T260I,THOC5:NM_001002878:exon9:c.C779T;p.T260I                                                                                                                                                                                                                                        | 1.208 |          | 2.23E-05 |          | Fam27_f_m_aF_uM_uM   | 0/1;0/0;0/1;0/0;0/0 |
| chr22 | 30009123 | 30009123 | C | T | MTMR3     | exonic | nonsynonymous SNV | MTMR3:NM_021090:exon12:c.C1115T;p.P372L,MTMR3:NM_153050:exon12:c.C1115T;p.P372L,MTMR3:NM_153051:exon12:c.C1115T;p.P372L                                                                                                                                                                                                                                                                                 | 2.04  |          | 9.84E-05 | 2.10E-05 | Fam7_f_m_aM_aM_uM    | 0/1;0/0;0/0;0/1;0/1 |
| chr22 | 30287253 | 30287253 | G | A | CASTOR1   | exonic | nonsynonymous SNV | CASTOR1:NM_001037666:exon4:c.C407T;p.T136M                                                                                                                                                                                                                                                                                                                                                              | 1.436 | 7.35E-05 | 8.08E-05 | 7.68E-05 | Fam91_m_aM_dM_aM_dM  | 0/0;0/0;0/0;0/1;0/1 |
| chr22 | 30294970 | 30294970 | C | T | TBC1D10A  | exonic | nonsynonymous SNV | TBC1D10A:NM_001204240:exon5:c.G631A;p.A211T,TBC1D10A:NM_031937:exon5:c.G610A;p.A204T                                                                                                                                                                                                                                                                                                                    | 1.789 |          | 7.46E-05 |          | Fam37_f_m_aF_uM      | 0/1;0/0;0/1;0/0     |
| chr22 | 30345147 | 30345147 | G | A | SF3A1     | exonic | nonsynonymous SNV | SF3A1:NM_005877:exon4:c.C437T;p.P146L                                                                                                                                                                                                                                                                                                                                                                   | 1.963 |          |          |          | Fam29_f_m_aF_uM      | 0/0;0/1;0/1;0/0     |
| chr22 | 30380398 | 30380398 | G | A | RNF215    | exonic | nonsynonymous SNV | RNF215:NM_001017981:exon6:c.C748T;p.P250S,OSBP2:NM_001282742:exon11:c.T1097G;p.L366R,OSBP2:NM_001282740:exon12:c.T1364G;p.L455R,OSBP2:NM_001282741:exon12:c.T1691G;p.L564R,OSBP2:NM_001282739:exon13:c.T2462G;p.L821R,OSBP2:NM_030758:exon13:c.T2465G;p.L822R,OSBP2:NM_001282738:exon14:c.T1967G;p.L656R                                                                                                | 1.13  |          |          |          | Fam91_m_aM_dM_aM_dM  | 0/0;0/1;0/1;0/0;0/0 |
| chr22 | 30905926 | 30905926 | T | G | OSBP2     | exonic | nonsynonymous SNV | MORC2:NM_001303256:exon6:c.A325G;p.M109V,MORC2:NM_001303257:exon6:c.A325G;p.M109V,MORC2:NM_014941:exon7:c.A139G;p.M47V                                                                                                                                                                                                                                                                                  | 1.818 |          |          |          | Fam113_f_m_aF_raM_uF | 0/1;0/0;0/0;0/1;0/1 |
| chr22 | 30946442 | 30946442 | T | C | MORC2     | exonic | nonsynonymous SNV | EIF4ENIF1:NM_001164501:exon5:c.T329C;p.L110S,EIF4ENIF1:NM_019843:exon5:c.T329C;p.L110S                                                                                                                                                                                                                                                                                                                  | 1.891 |          | 0.0002   | 3.49E-05 | Fam75_f_m_aM         | 0/0;0/1;0/1         |
| chr22 | 31463937 | 31463937 | A | G | EIF4ENIF1 | exonic | nonsynonymous SNV |                                                                                                                                                                                                                                                                                                                                                                                                         | 2.082 | 0.0005   | 0.0006   | 0.0002   | Fam123_f_aF          | 0/0;0/1             |

|       |          |          |   |   |         |        |                   |                                                                                                                                                                                                                                                                                                                                                                                                                                                                                                                                                                                                                                                                                                                                                                                                                                                                                                                                                                                                                                                                                                                                                                                                                                                                                                                                                                                                                                                                                                                                                                                                                                                                                                                                                                                                                                                                                                                                                                                                                                                                                                                                                                                                                                                                                                                                                                                                                                                                                                                                                                                                                                                                                                                                                                                                                                                                                                                                                                                                                                                                                                                                                                                                                                                                                                                                                                                                                                                                                                                                                                                                                                                                                                                                                                                                                                                                                                                                                                                                                                                                                                                                                                                                                                                                                                                                                                                                                                                                                                                                                                                                                                                                                                                                                                                                                                                                                                                                                                                                                                                                                                                                                                                                                                                                                                                                                                                                                                                                                                                                                                                                                                                                                                                                                                                                                                                                                                                                                                                                                                                                                                                                                                                                                                                                                                                                                                                                                                                                                                                                                                                                                                                                                                                                                                                                                                                                                                                                                                                                                                                                                                                                                                                                                                                                                                                                                                                                                                                                                                                                                                                                                                                                                                                                                                                                                                                                                                                                                                                                                                                                                                                                                                                                                                                                                                                                                                                                                                                                                                                                                                                                                                                                                                                                           |       |          |          |                      |                     |                     |
|-------|----------|----------|---|---|---------|--------|-------------------|-------------------------------------------------------------------------------------------------------------------------------------------------------------------------------------------------------------------------------------------------------------------------------------------------------------------------------------------------------------------------------------------------------------------------------------------------------------------------------------------------------------------------------------------------------------------------------------------------------------------------------------------------------------------------------------------------------------------------------------------------------------------------------------------------------------------------------------------------------------------------------------------------------------------------------------------------------------------------------------------------------------------------------------------------------------------------------------------------------------------------------------------------------------------------------------------------------------------------------------------------------------------------------------------------------------------------------------------------------------------------------------------------------------------------------------------------------------------------------------------------------------------------------------------------------------------------------------------------------------------------------------------------------------------------------------------------------------------------------------------------------------------------------------------------------------------------------------------------------------------------------------------------------------------------------------------------------------------------------------------------------------------------------------------------------------------------------------------------------------------------------------------------------------------------------------------------------------------------------------------------------------------------------------------------------------------------------------------------------------------------------------------------------------------------------------------------------------------------------------------------------------------------------------------------------------------------------------------------------------------------------------------------------------------------------------------------------------------------------------------------------------------------------------------------------------------------------------------------------------------------------------------------------------------------------------------------------------------------------------------------------------------------------------------------------------------------------------------------------------------------------------------------------------------------------------------------------------------------------------------------------------------------------------------------------------------------------------------------------------------------------------------------------------------------------------------------------------------------------------------------------------------------------------------------------------------------------------------------------------------------------------------------------------------------------------------------------------------------------------------------------------------------------------------------------------------------------------------------------------------------------------------------------------------------------------------------------------------------------------------------------------------------------------------------------------------------------------------------------------------------------------------------------------------------------------------------------------------------------------------------------------------------------------------------------------------------------------------------------------------------------------------------------------------------------------------------------------------------------------------------------------------------------------------------------------------------------------------------------------------------------------------------------------------------------------------------------------------------------------------------------------------------------------------------------------------------------------------------------------------------------------------------------------------------------------------------------------------------------------------------------------------------------------------------------------------------------------------------------------------------------------------------------------------------------------------------------------------------------------------------------------------------------------------------------------------------------------------------------------------------------------------------------------------------------------------------------------------------------------------------------------------------------------------------------------------------------------------------------------------------------------------------------------------------------------------------------------------------------------------------------------------------------------------------------------------------------------------------------------------------------------------------------------------------------------------------------------------------------------------------------------------------------------------------------------------------------------------------------------------------------------------------------------------------------------------------------------------------------------------------------------------------------------------------------------------------------------------------------------------------------------------------------------------------------------------------------------------------------------------------------------------------------------------------------------------------------------------------------------------------------------------------------------------------------------------------------------------------------------------------------------------------------------------------------------------------------------------------------------------------------------------------------------------------------------------------------------------------------------------------------------------------------------------------------------------------------------------------------------------------------------------------------------------------------------------------------------------------------------------------------------------------------------------------------------------------------------------------------------------------------------------------------------------------------------------------------------------------------------------------------------------------------------------------------------------------------------------------------------------------------------------------------------------------------------------------------------------------------------------------------------------------------------------------------------------------------------------------------------------------------------------------------------------------------------------------------------------------------------------------------------------------------------------------------------------------------------------------------------------------------------------------------------------------------------------------------------------------------------------------------------------------------------------------------------------------------------------------------------------------------------------------------------------------------------------------------------------------------------------------------------------------------------------------------------------------------------------------------------------------------------------------------------------------------------------------------------------------------------------|-------|----------|----------|----------------------|---------------------|---------------------|
| chr22 | 31906313 | 31906313 | G | A | DEPDC5  | exonic | nonsynonymous SNV | DEPDC5:NM_001242897:exon40:c.G4328A;p.R1443Q,DEPDC5:NM_001363854:exon41:c.G4394A;p.R1465Q,DEPDC5:NM_001364319:exon41:c.G4394A;p.R1465Q,DEPDC5:NM_001363852:exon42:c.G4562A;p.R1521Q,DEPDC5:NM_001369903:exon42:c.G4544A;p.R1515Q,DEPDC5:NM_001369903:exon42:c.G4535A;p.R1512Q,DEPDC5:NM_014662:exon42:c.G4535A;p.R1512Q,DEPDC5:NM_001136029:exon43:c.G4601A;p.R1534Q,DEPDC5:NM_001242896:exon43:c.G4628A;p.R1543Q,DEPDC5:NM_001364318:exon43:c.G4628A;p.R1543Q                                                                                                                                                                                                                                                                                                                                                                                                                                                                                                                                                                                                                                                                                                                                                                                                                                                                                                                                                                                                                                                                                                                                                                                                                                                                                                                                                                                                                                                                                                                                                                                                                                                                                                                                                                                                                                                                                                                                                                                                                                                                                                                                                                                                                                                                                                                                                                                                                                                                                                                                                                                                                                                                                                                                                                                                                                                                                                                                                                                                                                                                                                                                                                                                                                                                                                                                                                                                                                                                                                                                                                                                                                                                                                                                                                                                                                                                                                                                                                                                                                                                                                                                                                                                                                                                                                                                                                                                                                                                                                                                                                                                                                                                                                                                                                                                                                                                                                                                                                                                                                                                                                                                                                                                                                                                                                                                                                                                                                                                                                                                                                                                                                                                                                                                                                                                                                                                                                                                                                                                                                                                                                                                                                                                                                                                                                                                                                                                                                                                                                                                                                                                                                                                                                                                                                                                                                                                                                                                                                                                                                                                                                                                                                                                                                                                                                                                                                                                                                                                                                                                                                                                                                                                                                                                                                                                                                                                                                                                                                                                                                                                                                                                                                                                                                                                            | 1.3   | 0.0002   | 1.40E-05 | Fam117_f_m_aM_aF     | 0/1;0/0;0/1;0/0     |                     |
| chr22 | 35284013 | 35284013 | G | A | HMGXB4  | exonic | nonsynonymous SNV | HMGXB4:NM_001362972:exon5:c.G940A;p.V314M,HMGXB4:NM_001003681:exon6:c.G1267A;p.V423M                                                                                                                                                                                                                                                                                                                                                                                                                                                                                                                                                                                                                                                                                                                                                                                                                                                                                                                                                                                                                                                                                                                                                                                                                                                                                                                                                                                                                                                                                                                                                                                                                                                                                                                                                                                                                                                                                                                                                                                                                                                                                                                                                                                                                                                                                                                                                                                                                                                                                                                                                                                                                                                                                                                                                                                                                                                                                                                                                                                                                                                                                                                                                                                                                                                                                                                                                                                                                                                                                                                                                                                                                                                                                                                                                                                                                                                                                                                                                                                                                                                                                                                                                                                                                                                                                                                                                                                                                                                                                                                                                                                                                                                                                                                                                                                                                                                                                                                                                                                                                                                                                                                                                                                                                                                                                                                                                                                                                                                                                                                                                                                                                                                                                                                                                                                                                                                                                                                                                                                                                                                                                                                                                                                                                                                                                                                                                                                                                                                                                                                                                                                                                                                                                                                                                                                                                                                                                                                                                                                                                                                                                                                                                                                                                                                                                                                                                                                                                                                                                                                                                                                                                                                                                                                                                                                                                                                                                                                                                                                                                                                                                                                                                                                                                                                                                                                                                                                                                                                                                                                                                                                                                                                      | 1.801 | 0.0004   | 1.40E-05 | Fam106_f_m_aM        | 0/0;0/1;0/1         |                     |
| chr22 | 36284229 | 36284229 | G | A | MYH9    | exonic | nonsynonymous SNV | MYH9:NM_002473:exon40:c.C5629T;p.R1877W                                                                                                                                                                                                                                                                                                                                                                                                                                                                                                                                                                                                                                                                                                                                                                                                                                                                                                                                                                                                                                                                                                                                                                                                                                                                                                                                                                                                                                                                                                                                                                                                                                                                                                                                                                                                                                                                                                                                                                                                                                                                                                                                                                                                                                                                                                                                                                                                                                                                                                                                                                                                                                                                                                                                                                                                                                                                                                                                                                                                                                                                                                                                                                                                                                                                                                                                                                                                                                                                                                                                                                                                                                                                                                                                                                                                                                                                                                                                                                                                                                                                                                                                                                                                                                                                                                                                                                                                                                                                                                                                                                                                                                                                                                                                                                                                                                                                                                                                                                                                                                                                                                                                                                                                                                                                                                                                                                                                                                                                                                                                                                                                                                                                                                                                                                                                                                                                                                                                                                                                                                                                                                                                                                                                                                                                                                                                                                                                                                                                                                                                                                                                                                                                                                                                                                                                                                                                                                                                                                                                                                                                                                                                                                                                                                                                                                                                                                                                                                                                                                                                                                                                                                                                                                                                                                                                                                                                                                                                                                                                                                                                                                                                                                                                                                                                                                                                                                                                                                                                                                                                                                                                                                                                                                   | 1.408 | 7.52E-05 | 1.40E-05 | Fam91_m_aM_dM_aM_dM  | 0/1;0/0;0/0;0/1;0/0 |                     |
| chr22 | 36300183 | 36300183 | T | G | MYH9    | exonic | nonsynonymous SNV | MYH9:NM_002473:exon23:c.A2920C;p.K974Q                                                                                                                                                                                                                                                                                                                                                                                                                                                                                                                                                                                                                                                                                                                                                                                                                                                                                                                                                                                                                                                                                                                                                                                                                                                                                                                                                                                                                                                                                                                                                                                                                                                                                                                                                                                                                                                                                                                                                                                                                                                                                                                                                                                                                                                                                                                                                                                                                                                                                                                                                                                                                                                                                                                                                                                                                                                                                                                                                                                                                                                                                                                                                                                                                                                                                                                                                                                                                                                                                                                                                                                                                                                                                                                                                                                                                                                                                                                                                                                                                                                                                                                                                                                                                                                                                                                                                                                                                                                                                                                                                                                                                                                                                                                                                                                                                                                                                                                                                                                                                                                                                                                                                                                                                                                                                                                                                                                                                                                                                                                                                                                                                                                                                                                                                                                                                                                                                                                                                                                                                                                                                                                                                                                                                                                                                                                                                                                                                                                                                                                                                                                                                                                                                                                                                                                                                                                                                                                                                                                                                                                                                                                                                                                                                                                                                                                                                                                                                                                                                                                                                                                                                                                                                                                                                                                                                                                                                                                                                                                                                                                                                                                                                                                                                                                                                                                                                                                                                                                                                                                                                                                                                                                                                                    | 1.48  | 0.0003   | 6.98E-06 | Fam97_f_m_aM_aF      | 0/1;0/0;0/1;0/0     |                     |
| chr22 | 37373685 | 37373685 | T | A | ELFN2   | exonic | nonsynonymous SNV | ELFN2:NM_052906:exon3:c.A1850T;p.Q617L                                                                                                                                                                                                                                                                                                                                                                                                                                                                                                                                                                                                                                                                                                                                                                                                                                                                                                                                                                                                                                                                                                                                                                                                                                                                                                                                                                                                                                                                                                                                                                                                                                                                                                                                                                                                                                                                                                                                                                                                                                                                                                                                                                                                                                                                                                                                                                                                                                                                                                                                                                                                                                                                                                                                                                                                                                                                                                                                                                                                                                                                                                                                                                                                                                                                                                                                                                                                                                                                                                                                                                                                                                                                                                                                                                                                                                                                                                                                                                                                                                                                                                                                                                                                                                                                                                                                                                                                                                                                                                                                                                                                                                                                                                                                                                                                                                                                                                                                                                                                                                                                                                                                                                                                                                                                                                                                                                                                                                                                                                                                                                                                                                                                                                                                                                                                                                                                                                                                                                                                                                                                                                                                                                                                                                                                                                                                                                                                                                                                                                                                                                                                                                                                                                                                                                                                                                                                                                                                                                                                                                                                                                                                                                                                                                                                                                                                                                                                                                                                                                                                                                                                                                                                                                                                                                                                                                                                                                                                                                                                                                                                                                                                                                                                                                                                                                                                                                                                                                                                                                                                                                                                                                                                                                    | 1.306 |          |          | Fam28_f_m_aF_uF      | 0/0;0/1;0/1;0/1     |                     |
| chr22 | 37374621 | 37374621 | G | A | ELFN2   | exonic | nonsynonymous SNV | ELFN2:NM_052906:exon3:c.C914T;p.T305M                                                                                                                                                                                                                                                                                                                                                                                                                                                                                                                                                                                                                                                                                                                                                                                                                                                                                                                                                                                                                                                                                                                                                                                                                                                                                                                                                                                                                                                                                                                                                                                                                                                                                                                                                                                                                                                                                                                                                                                                                                                                                                                                                                                                                                                                                                                                                                                                                                                                                                                                                                                                                                                                                                                                                                                                                                                                                                                                                                                                                                                                                                                                                                                                                                                                                                                                                                                                                                                                                                                                                                                                                                                                                                                                                                                                                                                                                                                                                                                                                                                                                                                                                                                                                                                                                                                                                                                                                                                                                                                                                                                                                                                                                                                                                                                                                                                                                                                                                                                                                                                                                                                                                                                                                                                                                                                                                                                                                                                                                                                                                                                                                                                                                                                                                                                                                                                                                                                                                                                                                                                                                                                                                                                                                                                                                                                                                                                                                                                                                                                                                                                                                                                                                                                                                                                                                                                                                                                                                                                                                                                                                                                                                                                                                                                                                                                                                                                                                                                                                                                                                                                                                                                                                                                                                                                                                                                                                                                                                                                                                                                                                                                                                                                                                                                                                                                                                                                                                                                                                                                                                                                                                                                                                                     | 1.535 | 7.35E-05 | 0.0005   | Fam60_f_m_aF         | 0/1;0/0;0/1         |                     |
| chr22 | 37824913 | 37824913 | C | G | GALR3   | exonic | nonsynonymous SNV | GALR3:NM_003614:exon2:c.C550G;p.L184V                                                                                                                                                                                                                                                                                                                                                                                                                                                                                                                                                                                                                                                                                                                                                                                                                                                                                                                                                                                                                                                                                                                                                                                                                                                                                                                                                                                                                                                                                                                                                                                                                                                                                                                                                                                                                                                                                                                                                                                                                                                                                                                                                                                                                                                                                                                                                                                                                                                                                                                                                                                                                                                                                                                                                                                                                                                                                                                                                                                                                                                                                                                                                                                                                                                                                                                                                                                                                                                                                                                                                                                                                                                                                                                                                                                                                                                                                                                                                                                                                                                                                                                                                                                                                                                                                                                                                                                                                                                                                                                                                                                                                                                                                                                                                                                                                                                                                                                                                                                                                                                                                                                                                                                                                                                                                                                                                                                                                                                                                                                                                                                                                                                                                                                                                                                                                                                                                                                                                                                                                                                                                                                                                                                                                                                                                                                                                                                                                                                                                                                                                                                                                                                                                                                                                                                                                                                                                                                                                                                                                                                                                                                                                                                                                                                                                                                                                                                                                                                                                                                                                                                                                                                                                                                                                                                                                                                                                                                                                                                                                                                                                                                                                                                                                                                                                                                                                                                                                                                                                                                                                                                                                                                                                                     | 1.803 | 2.99E-05 |          | Fam16_f_m_aM_aM      | 0/0;0/1;0/1;0/0     |                     |
| chr22 | 37983675 | 37983675 | C | T | SOX10   | exonic | nonsynonymous SNV | SOX10:NM_006941:exon2:c.G110A;p.G37D                                                                                                                                                                                                                                                                                                                                                                                                                                                                                                                                                                                                                                                                                                                                                                                                                                                                                                                                                                                                                                                                                                                                                                                                                                                                                                                                                                                                                                                                                                                                                                                                                                                                                                                                                                                                                                                                                                                                                                                                                                                                                                                                                                                                                                                                                                                                                                                                                                                                                                                                                                                                                                                                                                                                                                                                                                                                                                                                                                                                                                                                                                                                                                                                                                                                                                                                                                                                                                                                                                                                                                                                                                                                                                                                                                                                                                                                                                                                                                                                                                                                                                                                                                                                                                                                                                                                                                                                                                                                                                                                                                                                                                                                                                                                                                                                                                                                                                                                                                                                                                                                                                                                                                                                                                                                                                                                                                                                                                                                                                                                                                                                                                                                                                                                                                                                                                                                                                                                                                                                                                                                                                                                                                                                                                                                                                                                                                                                                                                                                                                                                                                                                                                                                                                                                                                                                                                                                                                                                                                                                                                                                                                                                                                                                                                                                                                                                                                                                                                                                                                                                                                                                                                                                                                                                                                                                                                                                                                                                                                                                                                                                                                                                                                                                                                                                                                                                                                                                                                                                                                                                                                                                                                                                                      | 1.08  |          |          | Fam110_f_m_aM_aM_uMs | 0/0;0/1;0/1;0/1;0/0 |                     |
| chr22 | 38073058 | 38073058 | T | C | PICK1   | exonic | nonsynonymous SNV | PICK1:NM_001039583:exon10:c.T749C;p.I250T,PICK1:NM_001039584:exon10:c.T749C;p.I250T,PICK1:NM_012407:exon10:c.T749C;p.I250T                                                                                                                                                                                                                                                                                                                                                                                                                                                                                                                                                                                                                                                                                                                                                                                                                                                                                                                                                                                                                                                                                                                                                                                                                                                                                                                                                                                                                                                                                                                                                                                                                                                                                                                                                                                                                                                                                                                                                                                                                                                                                                                                                                                                                                                                                                                                                                                                                                                                                                                                                                                                                                                                                                                                                                                                                                                                                                                                                                                                                                                                                                                                                                                                                                                                                                                                                                                                                                                                                                                                                                                                                                                                                                                                                                                                                                                                                                                                                                                                                                                                                                                                                                                                                                                                                                                                                                                                                                                                                                                                                                                                                                                                                                                                                                                                                                                                                                                                                                                                                                                                                                                                                                                                                                                                                                                                                                                                                                                                                                                                                                                                                                                                                                                                                                                                                                                                                                                                                                                                                                                                                                                                                                                                                                                                                                                                                                                                                                                                                                                                                                                                                                                                                                                                                                                                                                                                                                                                                                                                                                                                                                                                                                                                                                                                                                                                                                                                                                                                                                                                                                                                                                                                                                                                                                                                                                                                                                                                                                                                                                                                                                                                                                                                                                                                                                                                                                                                                                                                                                                                                                                                                | 2.067 |          |          | Fam2_f_m_aF          | 0/1;0/0;0/1         |                     |
| chr22 | 38081107 | 38081107 | C | T | SLC16A8 | exonic | nonsynonymous SNV | SLC16A8:NM_013356:exon4:c.G931A;p.G311S                                                                                                                                                                                                                                                                                                                                                                                                                                                                                                                                                                                                                                                                                                                                                                                                                                                                                                                                                                                                                                                                                                                                                                                                                                                                                                                                                                                                                                                                                                                                                                                                                                                                                                                                                                                                                                                                                                                                                                                                                                                                                                                                                                                                                                                                                                                                                                                                                                                                                                                                                                                                                                                                                                                                                                                                                                                                                                                                                                                                                                                                                                                                                                                                                                                                                                                                                                                                                                                                                                                                                                                                                                                                                                                                                                                                                                                                                                                                                                                                                                                                                                                                                                                                                                                                                                                                                                                                                                                                                                                                                                                                                                                                                                                                                                                                                                                                                                                                                                                                                                                                                                                                                                                                                                                                                                                                                                                                                                                                                                                                                                                                                                                                                                                                                                                                                                                                                                                                                                                                                                                                                                                                                                                                                                                                                                                                                                                                                                                                                                                                                                                                                                                                                                                                                                                                                                                                                                                                                                                                                                                                                                                                                                                                                                                                                                                                                                                                                                                                                                                                                                                                                                                                                                                                                                                                                                                                                                                                                                                                                                                                                                                                                                                                                                                                                                                                                                                                                                                                                                                                                                                                                                                                                                   | 2.368 |          |          | Fam57_f_m_aM_uF      | 0/1;0/0;0/1;0/1     |                     |
| chr22 | 39233488 | 39233488 | C | T | PDGFB   | exonic | nonsynonymous SNV | PDGFB:NM_002608:exon3:c.G197A;p.R66H,PDGFB:NM_033016:exon3:c.G152A;p.R51H                                                                                                                                                                                                                                                                                                                                                                                                                                                                                                                                                                                                                                                                                                                                                                                                                                                                                                                                                                                                                                                                                                                                                                                                                                                                                                                                                                                                                                                                                                                                                                                                                                                                                                                                                                                                                                                                                                                                                                                                                                                                                                                                                                                                                                                                                                                                                                                                                                                                                                                                                                                                                                                                                                                                                                                                                                                                                                                                                                                                                                                                                                                                                                                                                                                                                                                                                                                                                                                                                                                                                                                                                                                                                                                                                                                                                                                                                                                                                                                                                                                                                                                                                                                                                                                                                                                                                                                                                                                                                                                                                                                                                                                                                                                                                                                                                                                                                                                                                                                                                                                                                                                                                                                                                                                                                                                                                                                                                                                                                                                                                                                                                                                                                                                                                                                                                                                                                                                                                                                                                                                                                                                                                                                                                                                                                                                                                                                                                                                                                                                                                                                                                                                                                                                                                                                                                                                                                                                                                                                                                                                                                                                                                                                                                                                                                                                                                                                                                                                                                                                                                                                                                                                                                                                                                                                                                                                                                                                                                                                                                                                                                                                                                                                                                                                                                                                                                                                                                                                                                                                                                                                                                                                                 | 1.136 | 0.0002   | 1.40E-05 | Fam55_f_m_aM_aM_dM   | 0/1;0/0;0/1;0/1;0/0 |                     |
| chr22 | 39315518 | 39315518 | A | G | RPL3    | exonic | nonsynonymous SNV | RPL3:NM_000967:exon5:c.T539C;p.L180L,RPL3:NM_001033853:exon5:c.T392C;p.L131P                                                                                                                                                                                                                                                                                                                                                                                                                                                                                                                                                                                                                                                                                                                                                                                                                                                                                                                                                                                                                                                                                                                                                                                                                                                                                                                                                                                                                                                                                                                                                                                                                                                                                                                                                                                                                                                                                                                                                                                                                                                                                                                                                                                                                                                                                                                                                                                                                                                                                                                                                                                                                                                                                                                                                                                                                                                                                                                                                                                                                                                                                                                                                                                                                                                                                                                                                                                                                                                                                                                                                                                                                                                                                                                                                                                                                                                                                                                                                                                                                                                                                                                                                                                                                                                                                                                                                                                                                                                                                                                                                                                                                                                                                                                                                                                                                                                                                                                                                                                                                                                                                                                                                                                                                                                                                                                                                                                                                                                                                                                                                                                                                                                                                                                                                                                                                                                                                                                                                                                                                                                                                                                                                                                                                                                                                                                                                                                                                                                                                                                                                                                                                                                                                                                                                                                                                                                                                                                                                                                                                                                                                                                                                                                                                                                                                                                                                                                                                                                                                                                                                                                                                                                                                                                                                                                                                                                                                                                                                                                                                                                                                                                                                                                                                                                                                                                                                                                                                                                                                                                                                                                                                                                              | 2.125 | 0.0001   | 3.49E-05 | Fam56_f_m_aF_aM      | 0/1;0/0;0/1;0/0     |                     |
| chr22 | 39488750 | 39488750 | C | T | MGAT3   | exonic | nonsynonymous SNV | MGAT3:NM_001098270:exon1:c.C1403T;p.T468M,MGAT3:NM_002409:exon2:c.C1403T;p.T468M                                                                                                                                                                                                                                                                                                                                                                                                                                                                                                                                                                                                                                                                                                                                                                                                                                                                                                                                                                                                                                                                                                                                                                                                                                                                                                                                                                                                                                                                                                                                                                                                                                                                                                                                                                                                                                                                                                                                                                                                                                                                                                                                                                                                                                                                                                                                                                                                                                                                                                                                                                                                                                                                                                                                                                                                                                                                                                                                                                                                                                                                                                                                                                                                                                                                                                                                                                                                                                                                                                                                                                                                                                                                                                                                                                                                                                                                                                                                                                                                                                                                                                                                                                                                                                                                                                                                                                                                                                                                                                                                                                                                                                                                                                                                                                                                                                                                                                                                                                                                                                                                                                                                                                                                                                                                                                                                                                                                                                                                                                                                                                                                                                                                                                                                                                                                                                                                                                                                                                                                                                                                                                                                                                                                                                                                                                                                                                                                                                                                                                                                                                                                                                                                                                                                                                                                                                                                                                                                                                                                                                                                                                                                                                                                                                                                                                                                                                                                                                                                                                                                                                                                                                                                                                                                                                                                                                                                                                                                                                                                                                                                                                                                                                                                                                                                                                                                                                                                                                                                                                                                                                                                                                                          | 2.164 |          | 1.40E-05 | Fam5_f_m_aM          | 0/0;0/0;0/1         |                     |
| chr22 | 39664859 | 39664859 | G | A | CACNA1I | exonic | nonsynonymous SNV | CACNA1I:NM_001003406:exon20:c.G3682A;p.G1228R,CACNA1I:NM_021096:exon21:c.G3787A;p.G1263R                                                                                                                                                                                                                                                                                                                                                                                                                                                                                                                                                                                                                                                                                                                                                                                                                                                                                                                                                                                                                                                                                                                                                                                                                                                                                                                                                                                                                                                                                                                                                                                                                                                                                                                                                                                                                                                                                                                                                                                                                                                                                                                                                                                                                                                                                                                                                                                                                                                                                                                                                                                                                                                                                                                                                                                                                                                                                                                                                                                                                                                                                                                                                                                                                                                                                                                                                                                                                                                                                                                                                                                                                                                                                                                                                                                                                                                                                                                                                                                                                                                                                                                                                                                                                                                                                                                                                                                                                                                                                                                                                                                                                                                                                                                                                                                                                                                                                                                                                                                                                                                                                                                                                                                                                                                                                                                                                                                                                                                                                                                                                                                                                                                                                                                                                                                                                                                                                                                                                                                                                                                                                                                                                                                                                                                                                                                                                                                                                                                                                                                                                                                                                                                                                                                                                                                                                                                                                                                                                                                                                                                                                                                                                                                                                                                                                                                                                                                                                                                                                                                                                                                                                                                                                                                                                                                                                                                                                                                                                                                                                                                                                                                                                                                                                                                                                                                                                                                                                                                                                                                                                                                                                                                  | 2.605 | 6.52E-05 | 1.40E-05 | Fam91_m_aM_dM_aM_dM  | 0/0;0/1;0/1;0/0;0/0 |                     |
| chr22 | 39672234 | 39672234 | G | A | CACNA1I | exonic | nonsynonymous SNV | CACNA1I:NM_001003406:exon26:c.G4470A;p.M1490I,CACNA1I:NM_021096:exon27:c.G4575A;p.M1525I                                                                                                                                                                                                                                                                                                                                                                                                                                                                                                                                                                                                                                                                                                                                                                                                                                                                                                                                                                                                                                                                                                                                                                                                                                                                                                                                                                                                                                                                                                                                                                                                                                                                                                                                                                                                                                                                                                                                                                                                                                                                                                                                                                                                                                                                                                                                                                                                                                                                                                                                                                                                                                                                                                                                                                                                                                                                                                                                                                                                                                                                                                                                                                                                                                                                                                                                                                                                                                                                                                                                                                                                                                                                                                                                                                                                                                                                                                                                                                                                                                                                                                                                                                                                                                                                                                                                                                                                                                                                                                                                                                                                                                                                                                                                                                                                                                                                                                                                                                                                                                                                                                                                                                                                                                                                                                                                                                                                                                                                                                                                                                                                                                                                                                                                                                                                                                                                                                                                                                                                                                                                                                                                                                                                                                                                                                                                                                                                                                                                                                                                                                                                                                                                                                                                                                                                                                                                                                                                                                                                                                                                                                                                                                                                                                                                                                                                                                                                                                                                                                                                                                                                                                                                                                                                                                                                                                                                                                                                                                                                                                                                                                                                                                                                                                                                                                                                                                                                                                                                                                                                                                                                                                                  | 1.341 | 2.25E-05 | 6.98E-06 | Fam4_f_m_aM          | 0/1;0/0;0/1         |                     |
| chr22 | 39679369 | 39679369 | G | A | CACNA1I | exonic | nonsynonymous SNV | CACNA1I:NM_001003406:exon31:c.G5213A;p.G1738D,CACNA1I:NM_021096:exon32:c.G5318A;p.G1773D                                                                                                                                                                                                                                                                                                                                                                                                                                                                                                                                                                                                                                                                                                                                                                                                                                                                                                                                                                                                                                                                                                                                                                                                                                                                                                                                                                                                                                                                                                                                                                                                                                                                                                                                                                                                                                                                                                                                                                                                                                                                                                                                                                                                                                                                                                                                                                                                                                                                                                                                                                                                                                                                                                                                                                                                                                                                                                                                                                                                                                                                                                                                                                                                                                                                                                                                                                                                                                                                                                                                                                                                                                                                                                                                                                                                                                                                                                                                                                                                                                                                                                                                                                                                                                                                                                                                                                                                                                                                                                                                                                                                                                                                                                                                                                                                                                                                                                                                                                                                                                                                                                                                                                                                                                                                                                                                                                                                                                                                                                                                                                                                                                                                                                                                                                                                                                                                                                                                                                                                                                                                                                                                                                                                                                                                                                                                                                                                                                                                                                                                                                                                                                                                                                                                                                                                                                                                                                                                                                                                                                                                                                                                                                                                                                                                                                                                                                                                                                                                                                                                                                                                                                                                                                                                                                                                                                                                                                                                                                                                                                                                                                                                                                                                                                                                                                                                                                                                                                                                                                                                                                                                                                                  | 2.626 |          | 1.40E-05 | Fam14_f_m_aM_aM      | 0/0;0/1;0/1;0/0     |                     |
| chr22 | 41578862 | 41578862 | T | A | PMM1    | exonic | nonsynonymous SNV | PMM1:NM_002676:exon6:c.A494T;p.K165M                                                                                                                                                                                                                                                                                                                                                                                                                                                                                                                                                                                                                                                                                                                                                                                                                                                                                                                                                                                                                                                                                                                                                                                                                                                                                                                                                                                                                                                                                                                                                                                                                                                                                                                                                                                                                                                                                                                                                                                                                                                                                                                                                                                                                                                                                                                                                                                                                                                                                                                                                                                                                                                                                                                                                                                                                                                                                                                                                                                                                                                                                                                                                                                                                                                                                                                                                                                                                                                                                                                                                                                                                                                                                                                                                                                                                                                                                                                                                                                                                                                                                                                                                                                                                                                                                                                                                                                                                                                                                                                                                                                                                                                                                                                                                                                                                                                                                                                                                                                                                                                                                                                                                                                                                                                                                                                                                                                                                                                                                                                                                                                                                                                                                                                                                                                                                                                                                                                                                                                                                                                                                                                                                                                                                                                                                                                                                                                                                                                                                                                                                                                                                                                                                                                                                                                                                                                                                                                                                                                                                                                                                                                                                                                                                                                                                                                                                                                                                                                                                                                                                                                                                                                                                                                                                                                                                                                                                                                                                                                                                                                                                                                                                                                                                                                                                                                                                                                                                                                                                                                                                                                                                                                                                                      | 1.288 | 1.12E-05 |          | Fam28_f_m_aF_uF      | 0/0;0/1;0/1;0/1     |                     |
| chr22 | 41996918 | 41996918 | G | T | SEPTIN3 | exonic | nonsynonymous SNV | SEPTIN3:NM_145733:exon11:c.G1028T;p.G343V,SEPTIN3:NM_001363845:exon12:c.G2522T;p.G841V                                                                                                                                                                                                                                                                                                                                                                                                                                                                                                                                                                                                                                                                                                                                                                                                                                                                                                                                                                                                                                                                                                                                                                                                                                                                                                                                                                                                                                                                                                                                                                                                                                                                                                                                                                                                                                                                                                                                                                                                                                                                                                                                                                                                                                                                                                                                                                                                                                                                                                                                                                                                                                                                                                                                                                                                                                                                                                                                                                                                                                                                                                                                                                                                                                                                                                                                                                                                                                                                                                                                                                                                                                                                                                                                                                                                                                                                                                                                                                                                                                                                                                                                                                                                                                                                                                                                                                                                                                                                                                                                                                                                                                                                                                                                                                                                                                                                                                                                                                                                                                                                                                                                                                                                                                                                                                                                                                                                                                                                                                                                                                                                                                                                                                                                                                                                                                                                                                                                                                                                                                                                                                                                                                                                                                                                                                                                                                                                                                                                                                                                                                                                                                                                                                                                                                                                                                                                                                                                                                                                                                                                                                                                                                                                                                                                                                                                                                                                                                                                                                                                                                                                                                                                                                                                                                                                                                                                                                                                                                                                                                                                                                                                                                                                                                                                                                                                                                                                                                                                                                                                                                                                                                                    | 2.106 |          |          | Fam24_f_m_aM_aM      | 0/1;0/0;0/0;0/1     |                     |
| chr22 | 42693201 | 42693201 | G | A | A4GALT  | exonic | nonsynonymous SNV | A4GALT:NM_001318038:exon3:c.C751T;p.P251S,A4GALT:NM_017436:exon3:c.C751T;p.P251S                                                                                                                                                                                                                                                                                                                                                                                                                                                                                                                                                                                                                                                                                                                                                                                                                                                                                                                                                                                                                                                                                                                                                                                                                                                                                                                                                                                                                                                                                                                                                                                                                                                                                                                                                                                                                                                                                                                                                                                                                                                                                                                                                                                                                                                                                                                                                                                                                                                                                                                                                                                                                                                                                                                                                                                                                                                                                                                                                                                                                                                                                                                                                                                                                                                                                                                                                                                                                                                                                                                                                                                                                                                                                                                                                                                                                                                                                                                                                                                                                                                                                                                                                                                                                                                                                                                                                                                                                                                                                                                                                                                                                                                                                                                                                                                                                                                                                                                                                                                                                                                                                                                                                                                                                                                                                                                                                                                                                                                                                                                                                                                                                                                                                                                                                                                                                                                                                                                                                                                                                                                                                                                                                                                                                                                                                                                                                                                                                                                                                                                                                                                                                                                                                                                                                                                                                                                                                                                                                                                                                                                                                                                                                                                                                                                                                                                                                                                                                                                                                                                                                                                                                                                                                                                                                                                                                                                                                                                                                                                                                                                                                                                                                                                                                                                                                                                                                                                                                                                                                                                                                                                                                                                          | 1.092 |          |          | Fam99_f_m_aM_aM      | 0/1;0/0;0/0;0/1     |                     |
| chr22 | 42693390 | 42693390 | C | T | A4GALT  | exonic | nonsynonymous SNV | A4GALT:NM_001318038:exon3:c.G562A;p.G188S,A4GALT:NM_017436:exon3:c.G562A;p.G188S                                                                                                                                                                                                                                                                                                                                                                                                                                                                                                                                                                                                                                                                                                                                                                                                                                                                                                                                                                                                                                                                                                                                                                                                                                                                                                                                                                                                                                                                                                                                                                                                                                                                                                                                                                                                                                                                                                                                                                                                                                                                                                                                                                                                                                                                                                                                                                                                                                                                                                                                                                                                                                                                                                                                                                                                                                                                                                                                                                                                                                                                                                                                                                                                                                                                                                                                                                                                                                                                                                                                                                                                                                                                                                                                                                                                                                                                                                                                                                                                                                                                                                                                                                                                                                                                                                                                                                                                                                                                                                                                                                                                                                                                                                                                                                                                                                                                                                                                                                                                                                                                                                                                                                                                                                                                                                                                                                                                                                                                                                                                                                                                                                                                                                                                                                                                                                                                                                                                                                                                                                                                                                                                                                                                                                                                                                                                                                                                                                                                                                                                                                                                                                                                                                                                                                                                                                                                                                                                                                                                                                                                                                                                                                                                                                                                                                                                                                                                                                                                                                                                                                                                                                                                                                                                                                                                                                                                                                                                                                                                                                                                                                                                                                                                                                                                                                                                                                                                                                                                                                                                                                                                                                                          | 1.083 | 6.19E-05 | 6.98E-06 | Fam90_f_m_aF_dM      | 0/0;0/0;0/1;0/0     |                     |
| chr22 | 42882291 | 42882291 | A | T | PACSIN2 | exonic | nonsynonymous SNV | PACSIN2:NM_001349974:exon6:c.T676A;p.Y226N,PACSIN2:NM_001184970:exon7:c.T799A;p.Y267N,PACSIN2:NM_001184971:exon7:c.T799A;p.Y267N,PACSIN2:NM_001349968:exon7:c.T799A;p.Y267N,PACSIN2:NM_001349969:exon7:c.T799A;p.Y267N,PACSIN2:NM_001349970:exon7:c.T799A;p.Y267N,PACSIN2:NM_001349971:exon7:c.T799A;p.Y267N,PACSIN2:NM_001349972:exon7:c.T799A;p.Y267N,PACSIN2:NM_001349973:exon7:c.T799A;p.Y267N,PACSIN2:NM_007229:exon7:c.T799A;p.Y267N                                                                                                                                                                                                                                                                                                                                                                                                                                                                                                                                                                                                                                                                                                                                                                                                                                                                                                                                                                                                                                                                                                                                                                                                                                                                                                                                                                                                                                                                                                                                                                                                                                                                                                                                                                                                                                                                                                                                                                                                                                                                                                                                                                                                                                                                                                                                                                                                                                                                                                                                                                                                                                                                                                                                                                                                                                                                                                                                                                                                                                                                                                                                                                                                                                                                                                                                                                                                                                                                                                                                                                                                                                                                                                                                                                                                                                                                                                                                                                                                                                                                                                                                                                                                                                                                                                                                                                                                                                                                                                                                                                                                                                                                                                                                                                                                                                                                                                                                                                                                                                                                                                                                                                                                                                                                                                                                                                                                                                                                                                                                                                                                                                                                                                                                                                                                                                                                                                                                                                                                                                                                                                                                                                                                                                                                                                                                                                                                                                                                                                                                                                                                                                                                                                                                                                                                                                                                                                                                                                                                                                                                                                                                                                                                                                                                                                                                                                                                                                                                                                                                                                                                                                                                                                                                                                                                                                                                                                                                                                                                                                                                                                                                                                                                                                                                                                | 1.415 | 0.0003   | 0.0007   | 6.98E-05             | Fam12_f_m_aM_uM_aM  | 0/1;0/0;0/0;0/0;0/1 |
| chr22 | 43212434 | 43212434 | C | G | SCUBE1  | exonic | nonsynonymous SNV | SCUBE1:NM_173050:exon17:c.G2212C;p.E738Q                                                                                                                                                                                                                                                                                                                                                                                                                                                                                                                                                                                                                                                                                                                                                                                                                                                                                                                                                                                                                                                                                                                                                                                                                                                                                                                                                                                                                                                                                                                                                                                                                                                                                                                                                                                                                                                                                                                                                                                                                                                                                                                                                                                                                                                                                                                                                                                                                                                                                                                                                                                                                                                                                                                                                                                                                                                                                                                                                                                                                                                                                                                                                                                                                                                                                                                                                                                                                                                                                                                                                                                                                                                                                                                                                                                                                                                                                                                                                                                                                                                                                                                                                                                                                                                                                                                                                                                                                                                                                                                                                                                                                                                                                                                                                                                                                                                                                                                                                                                                                                                                                                                                                                                                                                                                                                                                                                                                                                                                                                                                                                                                                                                                                                                                                                                                                                                                                                                                                                                                                                                                                                                                                                                                                                                                                                                                                                                                                                                                                                                                                                                                                                                                                                                                                                                                                                                                                                                                                                                                                                                                                                                                                                                                                                                                                                                                                                                                                                                                                                                                                                                                                                                                                                                                                                                                                                                                                                                                                                                                                                                                                                                                                                                                                                                                                                                                                                                                                                                                                                                                                                                                                                                                                                  | 1.472 | 4.81E-05 | 6.98E-06 | Fam53_f_m_aM         | 0/0;0/1;0/1         |                     |
| chr22 | 49885413 | 49885413 | G | A | ZBED4   | exonic | nonsynonymous SNV | ZBED4:NM_014838:exon2:c.G1751A;p.R584Q                                                                                                                                                                                                                                                                                                                                                                                                                                                                                                                                                                                                                                                                                                                                                                                                                                                                                                                                                                                                                                                                                                                                                                                                                                                                                                                                                                                                                                                                                                                                                                                                                                                                                                                                                                                                                                                                                                                                                                                                                                                                                                                                                                                                                                                                                                                                                                                                                                                                                                                                                                                                                                                                                                                                                                                                                                                                                                                                                                                                                                                                                                                                                                                                                                                                                                                                                                                                                                                                                                                                                                                                                                                                                                                                                                                                                                                                                                                                                                                                                                                                                                                                                                                                                                                                                                                                                                                                                                                                                                                                                                                                                                                                                                                                                                                                                                                                                                                                                                                                                                                                                                                                                                                                                                                                                                                                                                                                                                                                                                                                                                                                                                                                                                                                                                                                                                                                                                                                                                                                                                                                                                                                                                                                                                                                                                                                                                                                                                                                                                                                                                                                                                                                                                                                                                                                                                                                                                                                                                                                                                                                                                                                                                                                                                                                                                                                                                                                                                                                                                                                                                                                                                                                                                                                                                                                                                                                                                                                                                                                                                                                                                                                                                                                                                                                                                                                                                                                                                                                                                                                                                                                                                                                                                    | 1.281 | 7.34E-05 | 0.0006   | 0.0004               | Fam56_f_m_aF_aM     | 0/0;0/1;0/0;0/1     |
| chr22 | 50198442 | 50198442 | C | T | TRABD   | exonic | nonsynonymous SNV | TRABD:NM_001320484:exon10:c.C1066T;p.R356C,TRABD:NM_001320485:exon10:c.C1054T;p.R352C,TRABD:NM_001320487:exon10:c.C1054T;p.R352C,TRABD:NM_001320488:exon10:c.C1054T;p.R352C,TRABD:NM_025204:exon10:c.C1054T;p.R352C                                                                                                                                                                                                                                                                                                                                                                                                                                                                                                                                                                                                                                                                                                                                                                                                                                                                                                                                                                                                                                                                                                                                                                                                                                                                                                                                                                                                                                                                                                                                                                                                                                                                                                                                                                                                                                                                                                                                                                                                                                                                                                                                                                                                                                                                                                                                                                                                                                                                                                                                                                                                                                                                                                                                                                                                                                                                                                                                                                                                                                                                                                                                                                                                                                                                                                                                                                                                                                                                                                                                                                                                                                                                                                                                                                                                                                                                                                                                                                                                                                                                                                                                                                                                                                                                                                                                                                                                                                                                                                                                                                                                                                                                                                                                                                                                                                                                                                                                                                                                                                                                                                                                                                                                                                                                                                                                                                                                                                                                                                                                                                                                                                                                                                                                                                                                                                                                                                                                                                                                                                                                                                                                                                                                                                                                                                                                                                                                                                                                                                                                                                                                                                                                                                                                                                                                                                                                                                                                                                                                                                                                                                                                                                                                                                                                                                                                                                                                                                                                                                                                                                                                                                                                                                                                                                                                                                                                                                                                                                                                                                                                                                                                                                                                                                                                                                                                                                                                                                                                                                                       | 1.175 | 0.0002   | 2.79E-05 | Fam121_f_m_aF_aM     | 0/1;0/0;0/0;0/1     |                     |
| chr22 | 50406822 | 50406822 | G | A | PPP6R2  | exonic | nonsynonymous SNV | PPP6R2:NM_001242898:exon4:c.G361A;p.A121T,PPP6R2:NM_001242899:exon4:c.G361A;p.A121T,PPP6R2:NM_001242900:exon4:c.G361A;p.A121T,PPP6R2:NM_001351641:exon4:c.G361A;p.A121T,PPP6R2:NM_001351642:exon4:c.G361A;p.A121T,PPP6R2:NM_001351643:exon4:c.G361A;p.A121T,PPP6R2:NM_001351644:exon4:c.G361A;p.A121T,PPP6R2:NM_001351645:exon4:c.G361A;p.A121T,PPP6R2:NM_001351646:exon4:c.G361A;p.A121T,PPP6R2:NM_001351647:exon4:c.G361A;p.A121T,PPP6R2:NM_001351648:exon4:c.G361A;p.A121T,PPP6R2:NM_001351649:exon4:c.G361A;p.A121T,PPP6R2:NM_001351650:exon4:c.G361A;p.A121T,PPP6R2:NM_001351651:exon4:c.G361A;p.A121T,PPP6R2:NM_001351652:exon4:c.G361A;p.A121T,PPP6R2:NM_001351653:exon4:c.G361A;p.A121T,PPP6R2:NM_001351654:exon4:c.G361A;p.A121T,PPP6R2:NM_001351655:exon4:c.G361A;p.A121T,PPP6R2:NM_001351656:exon4:c.G361A;p.A121T,PPP6R2:NM_001351657:exon4:c.G361A;p.A121T,PPP6R2:NM_001351658:exon4:c.G361A;p.A121T,PPP6R2:NM_001351659:exon4:c.G361A;p.A121T,PPP6R2:NM_001351660:exon4:c.G361A;p.A121T,PPP6R2:NM_001351661:exon4:c.G361A;p.A121T,PPP6R2:NM_001351662:exon4:c.G361A;p.A121T,PPP6R2:NM_001351663:exon4:c.G361A;p.A121T,PPP6R2:NM_001351664:exon4:c.G361A;p.A121T,PPP6R2:NM_001351665:exon4:c.G361A;p.A121T,PPP6R2:NM_001351666:exon4:c.G361A;p.A121T,PPP6R2:NM_001351667:exon4:c.G361A;p.A121T,PPP6R2:NM_001351668:exon4:c.G361A;p.A121T,PPP6R2:NM_001351669:exon4:c.G361A;p.A121T,PPP6R2:NM_001351670:exon4:c.G361A;p.A121T,PPP6R2:NM_001351671:exon4:c.G361A;p.A121T,PPP6R2:NM_001351672:exon4:c.G361A;p.A121T,PPP6R2:NM_001351673:exon4:c.G361A;p.A121T,PPP6R2:NM_001351674:exon4:c.G361A;p.A121T,PPP6R2:NM_001351675:exon4:c.G361A;p.A121T,PPP6R2:NM_001351676:exon4:c.G361A;p.A121T,PPP6R2:NM_001351677:exon4:c.G361A;p.A121T,PPP6R2:NM_001351678:exon4:c.G361A;p.A121T,PPP6R2:NM_001351679:exon4:c.G361A;p.A121T,PPP6R2:NM_001351680:exon4:c.G361A;p.A121T,PPP6R2:NM_001351681:exon4:c.G361A;p.A121T,PPP6R2:NM_001351682:exon4:c.G361A;p.A121T,PPP6R2:NM_001351683:exon4:c.G361A;p.A121T,PPP6R2:NM_001351684:exon4:c.G361A;p.A121T,PPP6R2:NM_001351685:exon4:c.G361A;p.A121T,PPP6R2:NM_001351686:exon4:c.G361A;p.A121T,PPP6R2:NM_001351687:exon4:c.G361A;p.A121T,PPP6R2:NM_001351688:exon4:c.G361A;p.A121T,PPP6R2:NM_001351689:exon4:c.G361A;p.A121T,PPP6R2:NM_001351690:exon4:c.G361A;p.A121T,PPP6R2:NM_001351691:exon4:c.G361A;p.A121T,PPP6R2:NM_001351692:exon4:c.G361A;p.A121T,PPP6R2:NM_001351693:exon4:c.G361A;p.A121T,PPP6R2:NM_001351694:exon4:c.G361A;p.A121T,PPP6R2:NM_001351695:exon4:c.G361A;p.A121T,PPP6R2:NM_001351696:exon4:c.G361A;p.A121T,PPP6R2:NM_001351697:exon4:c.G361A;p.A121T,PPP6R2:NM_001351698:exon4:c.G361A;p.A121T,PPP6R2:NM_001351699:exon4:c.G361A;p.A121T,PPP6R2:NM_001351700:exon4:c.G361A;p.A121T,PPP6R2:NM_001351701:exon4:c.G361A;p.A121T,PPP6R2:NM_001351702:exon4:c.G361A;p.A121T,PPP6R2:NM_001351703:exon4:c.G361A;p.A121T,PPP6R2:NM_001351704:exon4:c.G361A;p.A121T,PPP6R2:NM_001351705:exon4:c.G361A;p.A121T,PPP6R2:NM_001351706:exon4:c.G361A;p.A121T,PPP6R2:NM_001351707:exon4:c.G361A;p.A121T,PPP6R2:NM_001351708:exon4:c.G361A;p.A121T,PPP6R2:NM_001351709:exon4:c.G361A;p.A121T,PPP6R2:NM_001351710:exon4:c.G361A;p.A121T,PPP6R2:NM_001351711:exon4:c.G361A;p.A121T,PPP6R2:NM_001351712:exon4:c.G361A;p.A121T,PPP6R2:NM_001351713:exon4:c.G361A;p.A121T,PPP6R2:NM_001351714:exon4:c.G361A;p.A121T,PPP6R2:NM_001351715:exon4:c.G361A;p.A121T,PPP6R2:NM_001351716:exon4:c.G361A;p.A121T,PPP6R2:NM_001351717:exon4:c.G361A;p.A121T,PPP6R2:NM_001351718:exon4:c.G361A;p.A121T,PPP6R2:NM_001351719:exon4:c.G361A;p.A121T,PPP6R2:NM_001351720:exon4:c.G361A;p.A121T,PPP6R2:NM_001351721:exon4:c.G361A;p.A121T,PPP6R2:NM_001351722:exon4:c.G361A;p.A121T,PPP6R2:NM_001351723:exon4:c.G361A;p.A121T,PPP6R2:NM_001351724:exon4:c.G361A;p.A121T,PPP6R2:NM_001351725:exon4:c.G361A;p.A121T,PPP6R2:NM_001351726:exon4:c.G361A;p.A121T,PPP6R2:NM_001351727:exon4:c.G361A;p.A121T,PPP6R2:NM_001351728:exon4:c.G361A;p.A121T,PPP6R2:NM_001351729:exon4:c.G361A;p.A121T,PPP6R2:NM_001351730:exon4:c.G361A;p.A121T,PPP6R2:NM_001351731:exon4:c.G361A;p.A121T,PPP6R2:NM_001351732:exon4:c.G361A;p.A121T,PPP6R2:NM_001351733:exon4:c.G361A;p.A121T,PPP6R2:NM_001351734:exon4:c.G361A;p.A121T,PPP6R2:NM_001351735:exon4:c.G361A;p.A121T,PPP6R2:NM_001351736:exon4:c.G361A;p.A121T,PPP6R2:NM_001351737:exon4:c.G361A;p.A121T,PPP6R2:NM_001351738:exon4:c.G361A;p.A121T,PPP6R2:NM_001351739:exon4:c.G361A;p.A121T,PPP6R2:NM_001351740:exon4:c.G361A;p.A121T,PPP6R2:NM_001351741:exon4:c.G361A;p.A121T,PPP6R2:NM_001351742:exon4:c.G361A;p.A121T,PPP6R2:NM_001351743:exon4:c.G361A;p.A121T,PPP6R2:NM_001351744:exon4:c.G361A;p.A121T,PPP6R2:NM_001351745:exon4:c.G361A;p.A121T,PPP6R2:NM_001351746:exon4:c.G361A;p.A121T,PPP6R2:NM_001351747:exon4:c.G361A;p.A121T,PPP6R2:NM_001351748:exon4:c.G361A;p.A121T,PPP6R2:NM_001351749:exon4:c.G361A;p.A121T,PPP6R2:NM_001351750:exon4:c.G361A;p.A121T,PPP6R2:NM_001351751:exon4:c.G361A;p.A121T,PPP6R2:NM_001351752:exon4:c.G361A;p.A121T,PPP6R2:NM_001351753:exon4:c.G361A;p.A121T,PPP6R2:NM_001351754:exon4:c.G361A;p.A121T,PPP6R2:NM_001351755:exon4:c.G361A;p.A121T,PPP6R2:NM_001351756:exon4:c.G361A;p.A121T,PPP6R2:NM_001351757:exon4:c.G361A;p.A121T,PPP6R2:NM_001351758:exon4:c.G361A;p.A121T,PPP6R2:NM_001351759:exon4:c.G361A;p.A121T,PPP6R2:NM_001351760:exon4:c.G361A;p.A121T,PPP6R2:NM_001351761:exon4:c.G361A;p.A121T,PPP6R2:NM_001351762:exon4:c.G361A;p.A121T,PPP6R2:NM_001351763:exon4:c.G361A;p.A121T,PPP6R2:NM_001351764:exon4:c.G361A;p.A121T,PPP6R2:NM_001351765:exon4:c.G361A;p.A121T,PPP6R2:NM_001351766:exon4:c.G361A;p.A121T,PPP6R2:NM_001351767:exon4:c.G361A;p.A121T,PPP6R2:NM_001351768:exon4:c.G361A;p.A121T,PPP6R2:NM_001351769:exon4:c.G361A;p.A121T,PPP6R2:NM_001351770:exon4:c.G361A;p.A121T,PPP6R2:NM_001351771:exon4:c.G361A;p.A121T,PPP6R2:NM_001351772:exon4:c.G361A;p.A121T,PPP6R2:NM_001351773:exon4:c.G361A;p.A121T,PPP6R2:NM_001351774:exon4:c.G361A;p.A121T,PPP6R2:NM_001351775:exon4:c.G361A;p.A121T,PPP6R2:NM_001351776:exon4:c.G361A;p.A121T,PPP6R2:NM_001351777:exon4:c.G361A;p.A121T,PPP6R2:NM_001351778:exon4:c.G361A;p.A121T,PPP6R2:NM_001351779:exon4:c.G361A;p.A121T,PPP6R2:NM_001351780:exon4:c.G361A;p.A121T,PPP6R2:NM_001351781:exon4:c.G361A;p.A121T,PPP6R2:NM_001351782:exon4:c.G361A;p.A121T,PPP6R2:NM_001351783:exon4:c.G361A;p.A121T,PPP6R2:NM_001351784:exon4:c.G361A;p.A121T,PPP6R2:NM_001351785:exon4:c.G361A;p.A121T,PPP6R2:NM_001351786:exon4:c.G361A;p.A121T,PPP6R2:NM_001351787:exon4:c.G361A;p.A121T,PPP6R2:NM_001351788:exon4:c.G361A;p.A121T,PPP6R2:NM_001351789:exon4:c.G361A;p.A121T,PPP6R2:NM_001351790:exon4:c.G361A;p.A121T,PPP6R2:NM_001351791:exon4:c.G361A;p.A121T,PPP6R2:NM_001351792:exon4:c.G361A;p.A121T,PPP6R2:NM_001351793:exon4:c.G361A;p.A121T,PPP6R2:NM_001351794:exon4:c.G361A;p.A121T,PPP6R2:NM_001351795:exon4:c.G361A;p.A121T,PPP6R2:NM_001351796:exon4:c.G361A;p.A121T,PPP6R2:NM_001351797:exon4:c.G361A;p.A121T,PPP6R2:NM_001351798:exon4:c.G361A;p.A121T,PPP6R2:NM_001351799:exon4:c.G361A;p.A121T,PPP6R2:NM_001351800:exon4:c.G361A;p.A121T,PPP6R2:NM_001351801:exon4:c.G361A;p.A121T,PPP6R2:NM_001351802:exon4:c.G361A;p.A121T,PPP6R2:NM_001351803:exon4:c.G361A;p.A121T,PPP6R2:NM_001351804:exon4:c.G361A;p.A121T,PPP6R2:NM_001351805:exon4:c.G361A;p.A121T,PPP6R2:NM_001351806:exon4:c.G361A;p.A121T,PPP6R2:NM_001351807:exon4:c.G361A;p.A121T,PPP6R2:NM_001351808:exon4:c.G361A;p.A121T,PPP6R2:NM_001351809:exon4:c.G361A;p.A121T,PPP6R2:NM_001351810:exon4:c.G361A;p.A121T,PPP6R2:NM_001351811:exon4:c.G361A;p.A121T,PPP6R2:NM_001351812:exon4:c.G361A;p.A121T,PPP6R2:NM_001351813:exon4:c.G361A;p.A121T,PPP6R2:NM_001351814:exon4:c.G361A;p.A121T,PPP6R2:NM_001351815:exon4:c.G361A;p.A121T,PPP6R2:NM_001351816:exon4:c.G361A;p.A121T,PPP6R2:NM_001351817:exon4:c.G361A;p.A121T,PPP6R2:NM_001351818:exon4:c.G361A;p.A121T,PPP6R2:NM_001351819:exon4:c.G361A;p.A121T,PPP6R2:NM_001351820:exon4:c.G361A;p.A121T,PPP6R2:NM_001351821:exon4:c.G361A;p.A121T,PPP6R2:NM_001351822:exon4:c.G361A;p.A121T,PPP6R2:NM_001351823:exon4:c.G361A;p.A121T,PPP6R2:NM_001351824:exon4:c.G361A;p.A121T,PPP6R2:NM_001351825:exon4:c.G361A;p.A121T,PPP6R2:NM_001351826:exon4:c.G361A;p.A121T,PPP6R2:NM_001351827:exon4:c.G361A;p.A121T,PPP6R2:NM_001351828:exon4:c.G361A;p.A121T,PPP6R2:NM_001351829:exon4:c.G361A;p.A121T,PPP6R2:NM_001351830:exon4:c.G361A;p.A121T,PPP6R2:NM_001351831:exon4:c.G361A;p.A121T,PPP6R2:NM_001351832:exon4:c.G361A;p.A121T,PPP6R2:NM_001351833:exon4:c.G361A;p.A121T,PPP6R2:NM_001351834:exon4:c.G361A;p.A121T,PPP6R2:NM_001351835:exon4:c.G361A;p.A121T,PPP6R2:NM_001351836:exon4:c.G361A;p.A121T,PPP6R2:NM_001351837:exon4:c.G361A;p |       |          |          |                      |                     |                     |



|      |          |          |   |   |         |        |                   |                                                                                                                                                                                                                                                                                                                                                                                                                                                                                                                                                                                                                                                                                                                                                                                                                                                                                                                                                                                |       |          |          |          |                     |                     |
|------|----------|----------|---|---|---------|--------|-------------------|--------------------------------------------------------------------------------------------------------------------------------------------------------------------------------------------------------------------------------------------------------------------------------------------------------------------------------------------------------------------------------------------------------------------------------------------------------------------------------------------------------------------------------------------------------------------------------------------------------------------------------------------------------------------------------------------------------------------------------------------------------------------------------------------------------------------------------------------------------------------------------------------------------------------------------------------------------------------------------|-------|----------|----------|----------|---------------------|---------------------|
| chr3 | 33581907 | 33581907 | C | T | CLASP2  | exonic | nonsynonymous SNV | CLASP2:NM_001207044:exon17:c.G1562A:p.R521Q,CLASP2:NM_001365630:exon21:c.G2219A:p.R740Q,CLASP2:NM_001365633:exon21:c.G2222A:p.R741Q,CLASP2:NM_001365634:exon21:c.G2219A:p.R740Q,CLASP2:NM_001365627:exon23:c.G2261A:p.R754Q,CLASP2:NM_001365628:exon23:c.G2264A:p.R755Q,CLASP2:NM_001365629:exon23:c.G2261A:p.R754Q,CLASP2:NM_001365631:exon23:c.G2261A:p.R754Q,CLASP2:NM_001365632:exon23:c.G2261A:p.R754Q,CLASP2:NM_015097:exon23:c.G2264A:p.R755Q                                                                                                                                                                                                                                                                                                                                                                                                                                                                                                                           | 1.411 |          |          |          | Fam35_f_m_aF_uM     | 0/1;0/0;0/1;0/0     |
| chr3 | 37997078 | 37997078 | T | A | VILL    | exonic | nonsynonymous SNV | VILL:NM_015873:exon5:c.T452A:p.V151E,SCNSA:NM_001099405:exon27:c.G5744A:p.G1915D,SCNSA:NM_001160161:exon27:c.G5636A:p.G1879D,SCNSA:NM_001354701:exon27:c.G5741A:p.G1914D,SCNSA:NM_000335:exon28:c.G5795A:p.G1932D,SCNSA:NM_001099404:exon28:c.G5798A:p.G1933D,SCNSA:NM_001160160:exon28:c.G5699A:p.G1900D,SCNSA:NM_198056:exon28:c.G5798A:p.G1933D,SCNSA:NM_001099405:exon27:c.G5636A:p.R1879Q,SCNSA:NM_001160161:exon27:c.G5528A:p.R1843Q,SCNSA:NM_001354701:exon27:c.G5633A:p.R1878Q,SCNSA:NM_000335:exon28:c.G5687A:p.R1896Q,SCNSA:NM_001099404:exon28:c.G5690A:p.R1897Q,SCNSA:NM_001160160:exon28:c.G5591A:p.R1864Q,SCNSA:NM_198056:exon28:c.G5690A:p.R1897Q,SCNSA:NM_001099405:exon27:c.G4877A:p.R1626H,SCNSA:NM_001160161:exon27:c.G4769A:p.R1590H,SCNSA:NM_001354701:exon27:c.G4874A:p.R1625H,SCNSA:NM_000335:exon28:c.G4928A:p.R1643H,SCNSA:NM_001099404:exon28:c.G4931A:p.R1644H,SCNSA:NM_001160160:exon28:c.G4832A:p.R1611H,SCNSA:NM_198056:exon28:c.G4931A:p.R1644H | 1.007 |          |          |          | Fam91_m_aM_dM_aM_dM | 0/1;0/0;0/1;0/1;0/1 |
| chr3 | 38550574 | 38550574 | C | T | SCN5A   | exonic | nonsynonymous SNV | SCNSA:NM_000335:exon3:c.A389G:p.H130R,SCNSA:NM_01099405:exon3:c.A389G:p.H130R,SCNSA:NM_001099405:exon3:c.A389G:p.H130R,SCNSA:NM_001160160:exon3:c.A389G:p.H130R,SCNSA:NM_001354701:exon3:c.A389G:p.H130R,SCNSA:NM_198056:exon3:c.A389G:p.H130R                                                                                                                                                                                                                                                                                                                                                                                                                                                                                                                                                                                                                                                                                                                                 | 1.311 | 3.29E-05 |          |          | Fam71_f_m_aF        | 0/0;0/1;0/1         |
| chr3 | 38550682 | 38550682 | C | T | SCN5A   | exonic | nonsynonymous SNV | CTNNB1:NM_001098209:exon9:c.C1499T:p.P500L,CTNNB1:NM_001098210:exon9:c.C1499T:p.P500L,CTNNB1:NM_001904:exon9:c.C1499T:p.P500L,CTNNB1:NM_001330729:exon10:c.C1478T:p.P493L,SNRK:NM_001330750:exon5:c.C1255T:p.R419C,SNRK:NM_001100594:exon6:c.C1873T:p.R625C,SNRK:NM_017719:exon7:c.C1873T:p.R625C                                                                                                                                                                                                                                                                                                                                                                                                                                                                                                                                                                                                                                                                              | 1.544 | 0.0006   | 9.81E-05 | 1.40E-05 | Fam54_f_m_aM_uF     | 0/0;0/1;0/1;0/1     |
| chr3 | 38551441 | 38551441 | C | T | SCN5A   | exonic | nonsynonymous SNV | TMEM158:NM_015444:exon1:c.C158T:p.S53L,SACM1L:NM_001319072:exon7:c.A485G:p.Y162C,SACM1L:NM_014016:exon8:c.A668G:p.Y223C,SACM1L:NM_001319073:exon9:c.A359G:p.Y120C                                                                                                                                                                                                                                                                                                                                                                                                                                                                                                                                                                                                                                                                                                                                                                                                              | 1.606 |          |          | 1.40E-05 | Fam117_f_m_aM_aF    | 0/1;0/0;0/0;0/1     |
| chr3 | 38630314 | 38630314 | T | C | SCN5A   | exonic | nonsynonymous SNV | CCR1:NM_001295:exon2:c.T467G:p.I1565,CCR1:NM_001295:exon2:c.C225G:p.N75K,NBEAL2:NM_001365116:exon47:c.C7351T:p.R2451W,NBEAL2:NM_015175:exon48:c.C7453T:p.R2485W,KLHL18:NM_025010:exon3:c.G376A:p.A126T,SMARCC1:NM_003074:exon6:c.C623G:p.P208R                                                                                                                                                                                                                                                                                                                                                                                                                                                                                                                                                                                                                                                                                                                                 | 1.225 |          |          |          | Fam65_f_m_aM_uF_dF  | 0/0;0/1;0/1;0/0;0/1 |
| chr3 | 41233842 | 41233842 | C | T | CTNNB1  | exonic | nonsynonymous SNV | DHX30:NM_138615:exon5:c.C245G:p.P82R,DHX30:NM_01330990:exon6:c.C161G:p.P54R,DHX30:NM_014966:exon6:c.C128G:p.P43R,DHX30:NM_138615:exon7:c.G430C:p.D144H,DHX30:NM_01330990:exon8:c.G346C:p.D116H,DHX30:NM_014966:exon8:c.G313C:p.D105H                                                                                                                                                                                                                                                                                                                                                                                                                                                                                                                                                                                                                                                                                                                                           | 1.282 |          |          |          | Fam38_f_m_aM        | 0/0;0/1;0/1         |
| chr3 | 43348132 | 43348132 | C | T | SNRK    | exonic | nonsynonymous SNV | PLXNB1:NM_001130082:exon36:c.A6175C:p.T2059P,PLXNB1:NM_002673:exon36:c.A6175C:p.T2059P,PLXNB1:NM_001130082:exon33:c.C5833T:p.R1945C,PLXNB1:NM_002673:exon33:c.C5833T:p.R1945C,PLXNB1:NM_001130082:exon21:c.C4132G:p.P1378A,PLXNB1:NM_002673:exon21:c.C4132G:p.P1378A                                                                                                                                                                                                                                                                                                                                                                                                                                                                                                                                                                                                                                                                                                           | 1.069 | 0.0001   | 0.0004   | 0.0001   | Fam70_f_m_aM        | 0/0;0/1;0/1         |
| chr3 | 45225205 | 45225205 | C | A | TMEM158 | exonic | nonsynonymous SNV | ATRIP:NM_032166:exon11:c.G2149T:p.V717F,ATRIP:NM_01271023:exon12:c.G1951F:p.V651F,ATRIP:NM_130384:exon12:c.G2230T:p.V744F,ATRIP:NM_001271022:exon13:c.G1849T:p.V617F                                                                                                                                                                                                                                                                                                                                                                                                                                                                                                                                                                                                                                                                                                                                                                                                           | 1.429 | 7.51E-05 |          | 2.82E-05 | Fam21_f_m_aM_uM     | 0/1;0/0;0/1;0/0     |
| chr3 | 45225870 | 45225870 | G | A | TMEM158 | exonic | nonsynonymous SNV | PFKFB4:NM_001317135:exon8:c.G677T:p.R226L,PFKFB4:NM_001317137:exon8:c.G710T:p.R237L,PFKFB4:NM_004567:exon8:c.G710T:p.R237L,PFKFB4:NM_001317134:exon9:c.G797T:p.R266L,PFKFB4:NM_001317138:exon9:c.G137T:p.R46L                                                                                                                                                                                                                                                                                                                                                                                                                                                                                                                                                                                                                                                                                                                                                                  | 2.098 |          |          |          | Fam94_f_m_aM        | 0/0;0/1;0/1         |
| chr3 | 45719590 | 45719590 | A | G | SACM1L  | exonic | nonsynonymous SNV | CELRS3:NM_001407:exon1:c.G2675A:p.R892H                                                                                                                                                                                                                                                                                                                                                                                                                                                                                                                                                                                                                                                                                                                                                                                                                                                                                                                                        | 1.391 |          |          |          | Fam117_f_m_aM_aF    | 0/0;0/1;0/0;0/1     |
| chr3 | 46203847 | 46203847 | A | C | CCR1    | exonic | nonsynonymous SNV |                                                                                                                                                                                                                                                                                                                                                                                                                                                                                                                                                                                                                                                                                                                                                                                                                                                                                                                                                                                | 1.105 | 7.34E-05 |          | 6.98E-06 | Fam107_f_m_aM       | 0/1;0/0;0/1         |
| chr3 | 46204089 | 46204089 | G | C | CCR1    | exonic | nonsynonymous SNV |                                                                                                                                                                                                                                                                                                                                                                                                                                                                                                                                                                                                                                                                                                                                                                                                                                                                                                                                                                                | 1.494 |          |          |          | Fam49_f_m_aM        | 0/0;0/1;0/1         |
| chr3 | 47007643 | 47007643 | C | T | NBEAL2  | exonic | nonsynonymous SNV |                                                                                                                                                                                                                                                                                                                                                                                                                                                                                                                                                                                                                                                                                                                                                                                                                                                                                                                                                                                | 1.398 | 7.35E-05 | 0.0001   | 5.58E-05 | Fam26_f_m_aM_uM     | 0/1;0/0;0/1;0/1     |
| chr3 | 47322683 | 47322683 | G | A | KLHL18  | exonic | nonsynonymous SNV |                                                                                                                                                                                                                                                                                                                                                                                                                                                                                                                                                                                                                                                                                                                                                                                                                                                                                                                                                                                | 1.483 | 7.34E-05 | 1.15E-05 | 6.98E-06 | Fam40_f_m_aM_aM     | 0/0;0/1;0/0;0/1     |
| chr3 | 47729048 | 47729048 | G | C | SMARCC1 | exonic | nonsynonymous SNV |                                                                                                                                                                                                                                                                                                                                                                                                                                                                                                                                                                                                                                                                                                                                                                                                                                                                                                                                                                                | 1.104 |          | 1.12E-05 |          | Fam98_f_m_aM        | 0/1;0/0;0/1         |
| chr3 | 47827467 | 47827467 | C | G | DHX30   | exonic | nonsynonymous SNV |                                                                                                                                                                                                                                                                                                                                                                                                                                                                                                                                                                                                                                                                                                                                                                                                                                                                                                                                                                                | 1.951 |          |          |          | Fam82_f_m_aM_uF     | 0/0;0/1;0/1;0/1     |
| chr3 | 47840940 | 47840940 | G | C | DHX30   | exonic | nonsynonymous SNV |                                                                                                                                                                                                                                                                                                                                                                                                                                                                                                                                                                                                                                                                                                                                                                                                                                                                                                                                                                                | 1.376 |          |          |          | Fam66_f_m_aM        | 0/1;0/0;0/1         |
| chr3 | 48406876 | 48406876 | T | G | PLXNB1  | exonic | nonsynonymous SNV |                                                                                                                                                                                                                                                                                                                                                                                                                                                                                                                                                                                                                                                                                                                                                                                                                                                                                                                                                                                | 1.27  |          |          |          | Fam116_f_m_aM_aF    | 0/1;0/0;0/1;0/1     |
| chr3 | 48409677 | 48409677 | G | A | PLXNB1  | exonic | nonsynonymous SNV |                                                                                                                                                                                                                                                                                                                                                                                                                                                                                                                                                                                                                                                                                                                                                                                                                                                                                                                                                                                | 1.626 | 7.35E-05 | 2.24E-05 | 2.79E-05 | Fam6_f_m_aM         | 0/1;0/0;0/1         |
| chr3 | 48414876 | 48414876 | G | C | PLXNB1  | exonic | nonsynonymous SNV |                                                                                                                                                                                                                                                                                                                                                                                                                                                                                                                                                                                                                                                                                                                                                                                                                                                                                                                                                                                | 1.465 |          | 4.48E-05 | 6.98E-06 | Fam50_f_m_aF        | 0/0;0/1;0/1         |
| chr3 | 48465005 | 48465005 | G | T | ATRIP   | exonic | nonsynonymous SNV |                                                                                                                                                                                                                                                                                                                                                                                                                                                                                                                                                                                                                                                                                                                                                                                                                                                                                                                                                                                | 1.084 |          | 6.22E-05 |          | Fam29_f_m_aF_uM     | 0/1;0/0;0/1;0/0     |
| chr3 | 48536386 | 48536386 | C | A | PFKFB4  | exonic | nonsynonymous SNV |                                                                                                                                                                                                                                                                                                                                                                                                                                                                                                                                                                                                                                                                                                                                                                                                                                                                                                                                                                                | 1.523 |          | 3.28E-05 | 6.98E-06 | Fam19_f_m_aM        | 0/0;0/1;0/1         |
| chr3 | 48659960 | 48659960 | C | T | CELRS3  | exonic | nonsynonymous SNV |                                                                                                                                                                                                                                                                                                                                                                                                                                                                                                                                                                                                                                                                                                                                                                                                                                                                                                                                                                                | 2.078 |          | 0.0001   | 3.49E-05 | Fam118_f_m_aM_aF_uM | 0/0;0/1;0/1;0/1;0/0 |

|      |          |          |   |   |                 |          |                   |                                                                                                                                                                                                                                                                                                                                                                                                                                                                                                                                                                                                                                                                                                                                                                                                                                                                                                                                              |       |          |          |          |                     |                     |
|------|----------|----------|---|---|-----------------|----------|-------------------|----------------------------------------------------------------------------------------------------------------------------------------------------------------------------------------------------------------------------------------------------------------------------------------------------------------------------------------------------------------------------------------------------------------------------------------------------------------------------------------------------------------------------------------------------------------------------------------------------------------------------------------------------------------------------------------------------------------------------------------------------------------------------------------------------------------------------------------------------------------------------------------------------------------------------------------------|-------|----------|----------|----------|---------------------|---------------------|
| chr3 | 48661503 | 48661503 | T | C | CELSR3          | exonic   | nonsynonymous SNV | CELSR3:NM_001407:exon1:c.A1132G:p.I378V                                                                                                                                                                                                                                                                                                                                                                                                                                                                                                                                                                                                                                                                                                                                                                                                                                                                                                      | 1.329 | 7.36E-05 | 7.08E-05 | 7.68E-05 | Fam91_m_aM_dM_aM_dM | 0/1;0/0;0/0;0/1;0/1 |
| chr3 | 48973752 | 48973752 | A | G | ARIH2           | exonic   | nonsynonymous SNV | ARIH2:NM_001317334:exon7:c.A398G:p.K133R,ARIH2:NM_001349211:exon8:c.A824G:p.K275R,ARIH2:NM_001349212:exon8:c.A398G:p.K133R,ARIH2:NM_001349209:exon9:c.A824G:p.K275R,ARIH2:NM_001349214:exon9:c.A824G:p.K275R,ARIH2:NM_001349215:exon9:c.A824G:p.K275R,ARIH2:NM_001349218:exon9:c.A608G:p.K203R,ARIH2:NM_001349221:exon9:c.A608G:p.K203R,ARIH2:NM_001349224:exon9:c.A572G:p.K191R,ARIH2:NM_001349226:exon9:c.A572G:p.K191R,ARIH2:NM_006321:exon9:c.A824G:p.K275R,ARIH2:NM_001317333:exon10:c.A824G:p.K275R,ARIH2:NM_001349213:exon10:c.A824G:p.K275R,ARIH2:NM_001349216:exon10:c.A608G:p.K203R,ARIH2:NM_001349217:exon10:c.A608G:p.K203R,ARIH2:NM_001349219:exon10:c.A608G:p.K203R,ARIH2:NM_001349227:exon10:c.A275G:p.K92R,ARIH2:NM_001349210:exon11:c.A824G:p.K275R,ARIH2:NM_001349220:exon11:c.A608G:p.K203R,ARIH2:NM_001349222:exon11:c.A572G:p.K191R,ARIH2:NM_001349223:exon11:c.A572G:p.K191R,ARIH2:NM_001349225:exon12:c.A572G:p.K191R | 1.205 |          | 1.12E-05 |          | Fam7_f_m_aM_aM_uM   | 0/0;0/1;0/0;0/1;0/0 |
| chr3 | 49026836 | 49026836 | G | A | IMPDH2          | exonic   | nonsynonymous SNV | IMPDH2:NM_000884:exon7:c.C670T:p.R224W                                                                                                                                                                                                                                                                                                                                                                                                                                                                                                                                                                                                                                                                                                                                                                                                                                                                                                       | 1.153 |          | 6.17E-05 | 1.40E-05 | Fam71_f_m_aF        | 0/0;0/1;0/1         |
| chr3 | 49098008 | 49098008 | T | C | QARS            | exonic   | nonsynonymous SNV | QARS:NM_001272073:exon23:c.A2228G:p.D743G,QARS:NM_005051:exon23:c.A2261G:p.D754G                                                                                                                                                                                                                                                                                                                                                                                                                                                                                                                                                                                                                                                                                                                                                                                                                                                             | 1.2   | 0.0005   | 0.0004   | 0.0003   | Fam119_f_m_aM_aM    | 0/0;0/1;0/1;0/1     |
| chr3 | 49131675 | 49131675 | G | A | LAMB2           | exonic   | nonsynonymous SNV | LAMB2:NM_002292:exon5:c.C508T:p.R170C                                                                                                                                                                                                                                                                                                                                                                                                                                                                                                                                                                                                                                                                                                                                                                                                                                                                                                        | 1.552 |          | 7.48E-05 | 6.98E-06 | Fam13_f_m_aM        | 0/1;0/0;0/1         |
| chr3 | 49172830 | 49172830 | C | T | KLHDC8B         | exonic   | nonsynonymous SNV | KLHDC8B:NM_173546:exon2:c.C61T:p.R21W                                                                                                                                                                                                                                                                                                                                                                                                                                                                                                                                                                                                                                                                                                                                                                                                                                                                                                        | 1.337 |          |          |          | Fam119_f_m_aM_aM    | 0/1;0/0;0/1;0/1     |
| chr3 | 49532285 | 49532285 | G | A | DAG1            | exonic   | nonsynonymous SNV | DAG1:NM_001177639:exon3:c.G1774A:p.E592K,DAG1:NM_001177643:exon3:c.G1774A:p.E592K,DAG1:NM_001177644:exon3:c.G1774A:p.E592K,DAG1:NM_004393:exon3:c.G1774A:p.E592K,DAG1:NM_001177635:exon4:c.G1774A:p.E592K,DAG1:NM_001177637:exon4:c.G1774A:p.E592K,DAG1:NM_001177638:exon4:c.G1774A:p.E592K,DAG1:NM_001177640:exon4:c.G1774A:p.E592K,DAG1:NM_001177641:exon4:c.G1774A:p.E592K,DAG1:NM_001177642:exon4:c.G1774A:p.E592K,DAG1:NM_001177636:exon5:c.G1774A:p.E592K,DAG1:NM_001165928:exon6:c.G1774A:p.E592K,DAG1:NM_001177634:exon6:c.G1774A:p.E592K                                                                                                                                                                                                                                                                                                                                                                                            | 1.013 |          | 2.24E-05 | 6.98E-06 | Fam14_f_m_aM_aM     | 0/0;0/1;0/1;0/1     |
| chr3 | 50093726 | 50093726 | C | T | RBM5            | exonic   | nonsynonymous SNV | RBM5:NM_005778:exon4:c.C190T:p.R64C                                                                                                                                                                                                                                                                                                                                                                                                                                                                                                                                                                                                                                                                                                                                                                                                                                                                                                          | 1.302 |          | 3.27E-05 |          | Fam75_f_m_aM        | 0/0;0/1;0/1         |
| chr3 | 50183239 | 50183239 | G | A | SEMA3F          | exonic   | nonsynonymous SNV | SEMA3F:NM_001318798:exon10:c.G775A:p.V259I,SEMA3F:NM_001318800:exon10:c.G979A:p.V327I,SEMA3F:NM_004186:exon11:c.G1072A:p.V358I                                                                                                                                                                                                                                                                                                                                                                                                                                                                                                                                                                                                                                                                                                                                                                                                               | 1.517 |          |          | 1.40E-05 | Fam7_f_m_aM_aM_uM   | 0/0;0/1;0/1;0/0;0/1 |
| chr3 | 50503216 | 50503216 | A | C | CACNA2D2        | splicing | .                 | .                                                                                                                                                                                                                                                                                                                                                                                                                                                                                                                                                                                                                                                                                                                                                                                                                                                                                                                                            | 0.41  |          |          |          | Fam72_f_m_aF_uF     | 0/1;0/0;0/1;0/0     |
| chr3 | 50607989 | 50607989 | T | C | CISH            | exonic   | nonsynonymous SNV | CISH:NM_145071:exon3:c.A395G:p.E132G,CISH:NM_013324:exon4:c.A446G:p.E149G                                                                                                                                                                                                                                                                                                                                                                                                                                                                                                                                                                                                                                                                                                                                                                                                                                                                    | 1.079 |          |          |          | Fam51_f_m_aM_uF     | 0/1;0/0;0/1;0/1     |
| chr3 | 51717745 | 51717745 | G | A | GRM2            | exonic   | nonsynonymous SNV | GRM2:NM_001349116:exon4:c.G1339A:p.V447M,GRM2:NM_000839:exon5:c.G2473A:p.V825M,GRM2:NM_00134917:exon6:c.G1282A:p.V428M                                                                                                                                                                                                                                                                                                                                                                                                                                                                                                                                                                                                                                                                                                                                                                                                                       | 1.409 |          | 2.24E-05 |          | Fam7_f_m_aM_aM_uM   | 0/1;0/0;0/1;0/1;0/1 |
| chr3 | 51935602 | 51935602 | C | T | RRP9            | exonic   | nonsynonymous SNV | RRP9:NM_004704:exon9:c.G826A:p.V276M                                                                                                                                                                                                                                                                                                                                                                                                                                                                                                                                                                                                                                                                                                                                                                                                                                                                                                         | 1.29  | 7.34E-05 | 0.0001   | 7.68E-05 | Fam121_f_m_aF_aM    | 0/0;0/1;0/0;0/1     |
| chr3 | 52147085 | 52147085 | C | T | POC1A           | exonic   | nonsynonymous SNV | POC1A:NM_001161580:exon5:c.G466A:p.D156N,POC1A:NM_001161581:exon5:c.G352A:p.D118N,POC1A:NM_015426:exon5:c.G466A:p.D156N                                                                                                                                                                                                                                                                                                                                                                                                                                                                                                                                                                                                                                                                                                                                                                                                                      | 1.009 |          | 0.0002   | 6.98E-05 | Fam20_f_m_aM_uF     | 0/1;0/0;0/1;0/0     |
| chr3 | 52897437 | 52897437 | G | A | STIMATE;STIMATE | exonic   | nonsynonymous SNV | STIMATE-MUSTN1:NM_001198974:exon1:c.C14T:p.A5V,STIMATE:NM_198563:exon1:c.C14T:p.A5V                                                                                                                                                                                                                                                                                                                                                                                                                                                                                                                                                                                                                                                                                                                                                                                                                                                          | 1.667 |          |          | 4.19E-05 | Fam7_f_m_aM_aM_uM   | 0/1;0/0;0/1;0/1;0/1 |
| chr3 | 52912569 | 52912569 | A | G | SFMBT1          | exonic   | nonsynonymous SNV | SFMBT1:NM_016329:exon16:c.T1699C:p.W567R                                                                                                                                                                                                                                                                                                                                                                                                                                                                                                                                                                                                                                                                                                                                                                                                                                                                                                     | 1.457 |          | 3.28E-05 | 6.98E-06 | Fam121_f_m_aF_aM    | 0/1;0/0;0/0;0/1     |
| chr3 | 53231388 | 53231388 | G | C | TKT             | exonic   | nonsynonymous SNV | TKT:NM_001064:exon7:c.C911G:p.P304R,TKT:NM_00113505:exon7:c.C911G:p.P304R,TKT:NM_00128028:exon8:c.C935G:p.P312R                                                                                                                                                                                                                                                                                                                                                                                                                                                                                                                                                                                                                                                                                                                                                                                                                              | 1.144 |          |          |          | Fam85_f_m_aM_aM     | 0/1;0/0;0/1;0/1     |
| chr3 | 53775936 | 53775936 | G | A | CACNA1D         | exonic   | nonsynonymous SNV | CACNA1D:NM_001128839:exon34:c.G4208A:p.G1403E,CACNA1D:NM_001128840:exon35:c.G4253A:p.G1418E,CACNA1D:NM_000720:exon36:c.G4313A:p.G1438E                                                                                                                                                                                                                                                                                                                                                                                                                                                                                                                                                                                                                                                                                                                                                                                                       | 2.143 |          |          |          | Fam54_f_m_aM_uF     | 0/1;0/0;0/1;0/0     |
| chr3 | 56646923 | 56646923 | T | C | TASOR           | exonic   | nonsynonymous SNV | TASOR:NM_015224:exon7:c.A626G:p.Y209C,TASOR:NM_01112736:exon14:c.A1814G:p.Y605C,TASOR:NM_001363940:exon14:c.A1814G:p.Y605C,TASOR:NM_001365635:exon14:c.A1814G:p.Y605C,TASOR:NM_001365636:exon14:c.A1814G:p.Y605C,TASOR:NM_001365637:exon14:c.A1814G:p.Y605C,TASOR:NM_001365638:exon14:c.A1814G:p.Y605C                                                                                                                                                                                                                                                                                                                                                                                                                                                                                                                                                                                                                                       | 1.044 |          | 6.66E-05 |          | Fam42_f_m_aM_uF     | 0/1;0/0;0/1;0/1     |
| chr3 | 57663646 | 57663646 | T | C | DENND6A         | exonic   | nonsynonymous SNV | DENND6A:NM_152678:exon5:c.A503G:p.Y168C                                                                                                                                                                                                                                                                                                                                                                                                                                                                                                                                                                                                                                                                                                                                                                                                                                                                                                      | 1.399 |          | 3.63E-05 |          | Fam5_f_m_aM         | 0/0;0/1;0/1         |
| chr3 | 58136145 | 58136145 | A | T | FLNB            | exonic   | nonsynonymous SNV | FLNB:NM_001164318:exon28:c.A4838T:p.D1613V,FLNB:NM_001164319:exon28:c.A4838T:p.D1613V,FLNB:NM_001457:exon28:c.A4838T:p.D1613V,FLNB:NM_001164317:exon29:c.A4931T:p.D1644V                                                                                                                                                                                                                                                                                                                                                                                                                                                                                                                                                                                                                                                                                                                                                                     | 1.088 |          |          |          | Fam99_f_m_aM_aM     | 0/0;0/1;0/0;0/1     |

|      |           |           |       |   |          |          |                     |                                                                                                                                                                                                                                                                                                                                                                                                                                                                                                                                                                                                                                                                                                                                                                |       |          |          |                      |                     |                 |
|------|-----------|-----------|-------|---|----------|----------|---------------------|----------------------------------------------------------------------------------------------------------------------------------------------------------------------------------------------------------------------------------------------------------------------------------------------------------------------------------------------------------------------------------------------------------------------------------------------------------------------------------------------------------------------------------------------------------------------------------------------------------------------------------------------------------------------------------------------------------------------------------------------------------------|-------|----------|----------|----------------------|---------------------|-----------------|
| chr3 | 58424869  | 58424869  | G     | T | PXK      | exonic   | nonsynonymous SNV   | PXK:NM_001349532:exon14:c.G1172T:p.R391L,PXK:NM_001289101:exon15:c.G1235T:p.R412L,PXK:NM_001349526:exon15:c.G1232T:p.R411L,PXK:NM_001289096:exon16:c.G1547T:p.R516L,PXK:NM_001349500:exon16:c.G1544T:p.R515L,PXK:NM_001349501:exon16:c.G1535T:p.R512L,PXK:NM_001349502:exon16:c.G1532T:p.R511L,PXK:NM_001349491:exon17:c.G1235T:p.R412L,PXK:NM_001349494:exon17:c.G1598T:p.R533L,PXK:NM_001349495:exon17:c.G1595T:p.R532L,PXK:NM_001349496:exon17:c.G1595T:p.R532L,PXK:NM_001349497:exon17:c.G1592T:p.R531L,PXK:NM_001349499:exon17:c.G1583T:p.R528L,PXK:NM_001289099:exon18:c.G1397T:p.R466L,PXK:NM_001349498:exon18:c.G1586T:p.R529L,PXK:NM_017771:exon18:c.G1646T:p.R549L,PXK:NM_001349489:exon19:c.G1397T:p.R466L,PXK:NM_001349521:exon19:c.G1394T:p.R465L | 1.052 |          |          | Fam106_f_m_aM        | 0/1;0/0;0/1         |                 |
| chr3 | 58430809  | 58430809  | C     | T | PDHB     | exonic   | nonsynonymous SNV   | PDHB:NM_001315536:exon5:c.G383A:p.G128E,PDHB:NM_000925:exon6:c.G437A:p.G146E                                                                                                                                                                                                                                                                                                                                                                                                                                                                                                                                                                                                                                                                                   | 1.418 |          |          | Fam121_f_m_aF_aM     | 0/1;0/0;0/0;0/1     |                 |
| chr3 | 58430855  | 58430855  | A     | T | PDHB     | exonic   | nonsynonymous SNV   | PDHB:NM_001315536:exon5:c.T337A:p.Y113N,PDHB:NM_000925:exon6:c.T391A:p.Y131N,PDHB:NM_001173468:exon6:c.T391A:p.Y131N                                                                                                                                                                                                                                                                                                                                                                                                                                                                                                                                                                                                                                           | 1.484 |          |          | Fam44_f_m_aM_uF      | 0/1;0/0;0/1;0/0     |                 |
| chr3 | 64019411  | 64019411  | A     | C | PSMD6    | exonic   | nonsynonymous SNV   | PSMD6:NM_001271780:exon3:c.T268G:p.Y90D,PSMD6:NM_001271781:exon3:c.T265G:p.Y89D,PSMD6:NM_014814:exon3:c.T382G:p.Y128D,PSMD6:NM_001271779:exon4:c.T541G:p.Y181D                                                                                                                                                                                                                                                                                                                                                                                                                                                                                                                                                                                                 | 1.735 | 1.12E-05 |          | Fam7_f_m_aM_aM_uM    | 0/1;0/0;0/1;0/1;0/1 |                 |
| chr3 | 64023343  | 64023343  | A     | C | PSMD6    | exonic   | nonsynonymous SNV   | PSMD6:NM_001271779:exon1:c.T77G:p.L26R,PSMD6:NM_014814:exon1:c.T77G:p.L26R                                                                                                                                                                                                                                                                                                                                                                                                                                                                                                                                                                                                                                                                                     | 1.673 |          |          | Fam70_f_m_aM         | 0/0;0/1;0/1         |                 |
| chr3 | 64147517  | 64147517  | C     | T | PRICKLE2 | exonic   | nonsynonymous SNV   | PRICKLE2:NM_001370528:exon7:c.G973A:p.A325T,PRICKLE2:NM_198859:exon7:c.G973A:p.A325T                                                                                                                                                                                                                                                                                                                                                                                                                                                                                                                                                                                                                                                                           | 1.347 | 9.83E-05 | 3.49E-05 | Fam56_f_m_aF_aM      | 0/1;0/0;0/0;0/1     |                 |
| chr3 | 64604091  | 64604097  | TGGC- |   | ADAMTS9  | splicing | .                   | .                                                                                                                                                                                                                                                                                                                                                                                                                                                                                                                                                                                                                                                                                                                                                              | 0.47  | 6.71E-05 | 3.49E-05 | Fam101_f_m_aM        | 0/0;0/1;0/1         |                 |
| chr3 | 69056810  | 69056810  | A     | - | UBA3     | exonic   | frameshift deletion | UBA3:NM_001363861:exon11:c.847delT:p.C283Vfs*8,UBA3:NM_198195:exon12:c.928delT:p.C310Vfs*8,UBA3:NM_003968:exon13:c.970delT:p.C324Vfs*8                                                                                                                                                                                                                                                                                                                                                                                                                                                                                                                                                                                                                         | 0.437 |          |          | Fam115_f_m_aF_aM_aF  | 0/0;0/1;0/0;0/1;0/1 |                 |
| chr3 | 73624208  | 73624208  | C     | G | PDZRN3   | exonic   | nonsynonymous SNV   | PDZRN3:NM_015009:exon1:c.G618C:p.Q206H                                                                                                                                                                                                                                                                                                                                                                                                                                                                                                                                                                                                                                                                                                                         | 1.328 |          |          | Fam95_f_m_aM_aM_uF   | 0/0;0/1;0/1;0/1;0/0 |                 |
| chr3 | 98581407  | 98581407  | C     | T | CPOX     | exonic   | nonsynonymous SNV   | CPOX:NM_000097:exon6:c.G1277A:p.R426Q                                                                                                                                                                                                                                                                                                                                                                                                                                                                                                                                                                                                                                                                                                                          | 1.55  |          |          | Fam30_f_m_aM_uM      | 0/1;0/0;0/1;0/0     |                 |
| chr3 | 101328508 | 101328508 | G     | C | SENP7    | exonic   | nonsynonymous SNV   | SENP7:NM_001282803:exon19:c.C2342G:p.S781C,SENP7:NM_001077203:exon21:c.C2639G:p.S880C,SENP7:NM_001282802:exon21:c.C2636G:p.S879C,SENP7:NM_001282802:exon21:c.C2735G:p.S912C,SENP7:NM_020654:exon22:c.C2834G:p.S945C                                                                                                                                                                                                                                                                                                                                                                                                                                                                                                                                            | 1.914 | 0.0002   | 6.98E-05 | Fam28_f_m_aF_uF      | 0/0;0/1;0/1;0/1     |                 |
| chr3 | 105751475 | 105751475 | G     | A | CBLB     | exonic   | nonsynonymous SNV   | CBLB:NM_001321796:exon4:c.C563T:p.T188I,CBLB:NM_001321799:exon4:c.C563T:p.T188I,CBLB:NM_001321786:exon5:c.C794T:p.T265I,CBLB:NM_001321788:exon5:c.C710T:p.T237I,CBLB:NM_001321789:exon5:c.C794T:p.T265I,CBLB:NM_001321790:exon5:c.C776T:p.T259I,CBLB:NM_001321791:exon5:c.C710T:p.T237I,CBLB:NM_001321794:exon5:c.C710T:p.T237I,CBLB:NM_001321795:exon5:c.C710T:p.T237I,CBLB:NM_001321797:exon5:c.C710T:p.T237I,CBLB:NM_001321798:exon5:c.C710T:p.T237I,CBLB:NM_170662:exon5:c.C710T:p.T237I                                                                                                                                                                                                                                                                   | 1.502 | 1.12E-05 |          | Fam50_f_m_aF         | 0/1;0/0;0/1         |                 |
| chr3 | 113279353 | 113279353 | C     | T | BOC      | exonic   | nonsynonymous SNV   | BOC:NM_001301861:exon12:c.C1921T:p.R641C,BOC:NM_033254:exon12:c.C1918T:p.R640C                                                                                                                                                                                                                                                                                                                                                                                                                                                                                                                                                                                                                                                                                 | 1.006 | 3.35E-05 |          | Fam113_f_m_aF_raM_uF | 0/0;0/0;0/0;0/1;0/0 |                 |
| chr3 | 114171811 | 114171811 | T     | G | DRD3     | exonic   | nonsynonymous SNV   | DRD3:NM_000796:exon2:c.A182C:p.Q61P,DRD3:NM_033663:exon2:c.A182C:p.Q61P,DRD3:NM_001282563:exon3:c.A182C:p.Q61P,DRD3:NM_001290809:exon3:c.A182C:p.Q61P                                                                                                                                                                                                                                                                                                                                                                                                                                                                                                                                                                                                          | 1.155 |          |          | Fam7_f_m_aM_aM_uM    | 0/0;0/1;0/1;0/1;0/1 |                 |
| chr3 | 114350526 | 114350526 | C     | T | ZBTB20   | exonic   | nonsynonymous SNV   | ZBTB20:NM_001164342:exon4:c.G1552A:p.G518S,ZBTB20:NM_001164346:exon5:c.G1333A:p.G445S,ZBTB20:NM_001164345:exon6:c.G1333A:p.G445S,ZBTB20:NM_001164344:exon7:c.G1333A:p.G445S,ZBTB20:NM_001348804:exon9:c.G1333A:p.G445S,ZBTB20:NM_015642:exon9:c.G1333A:p.G445S,ZBTB20:NM_001348802:exon10:c.G1333A:p.G445S,ZBTB20:NM_001348805:exon10:c.G1333A:p.G445S,ZBTB20:NM_001164343:exon11:c.G1333A:p.G445S,ZBTB20:NM_001348800:exon11:c.G1552A:p.G518S,ZBTB20:NM_001348801:exon11:c.G1333A:p.G445S,ZBTB20:NM_001348803:exon13:c.G1552A:p.G518S                                                                                                                                                                                                                         | 2.337 | 1.12E-05 | 6.98E-06 | Fam69_f_m_aM         | 0/1;0/0;0/1         |                 |
| chr3 | 115676160 | 115676160 | C     | T | GAP43    | exonic   | stopgain            | GAP43:NM_002045:exon2:c.C178T:p.Q60X,GAP43:NM_01130064:exon3:c.C286T:p.Q96X                                                                                                                                                                                                                                                                                                                                                                                                                                                                                                                                                                                                                                                                                    | 0.358 |          |          | Fam48_f_m_aM_uM      | 0/0;0/1;0/1;0/0     |                 |
| chr3 | 120335947 | 120335947 | C     | A | LRRCS8   | exonic   | nonsynonymous SNV   | LRRCS8:NM_001099678:exon2:c.G507T:p.E169D                                                                                                                                                                                                                                                                                                                                                                                                                                                                                                                                                                                                                                                                                                                      | 1.82  | 0.0001   | 6.61E-05 | 2.79E-05             | Fam25_f_m_aM        | 0/1;0/0;0/1     |
| chr3 | 121545871 | 121545871 | G     | T | POLQ     | exonic   | nonsynonymous SNV   | POLQ:NM_199420:exon1:c.C7A:p.L3I                                                                                                                                                                                                                                                                                                                                                                                                                                                                                                                                                                                                                                                                                                                               | 1.084 | 0.0001   | 2.25E-05 | 6.98E-06             | Fam31_f_m_aM_uF     | 0/1;0/0;0/1;0/1 |
| chr3 | 122283867 | 122283867 | G     | A | CASR     | exonic   | nonsynonymous SNV   | CASR:NM_000388:exon7:c.G1913A:p.R638H,CASR:NM_001178065:exon7:c.G1943A:p.R648H                                                                                                                                                                                                                                                                                                                                                                                                                                                                                                                                                                                                                                                                                 | 1.215 | 7.35E-05 | 0.0002   | 4.19E-05             | Fam121_f_m_aF_aM    | 0/1;0/0;0/1;0/1 |
| chr3 | 122795254 | 122795254 | C     | T | SLC49A4  | exonic   | nonsynonymous SNV   | SLC49A4:NM_032839:exon1:c.C62T:p.P21L                                                                                                                                                                                                                                                                                                                                                                                                                                                                                                                                                                                                                                                                                                                          | 1.701 |          |          | Fam72_f_m_aF_uF      | 0/1;0/0;0/1;0/0     |                 |

|      |           |           |   |   |        |        |                   |                                                                                                                                                                                                                                                                                                                                                                                                                                                                                               |       |          |          |                              |                     |
|------|-----------|-----------|---|---|--------|--------|-------------------|-----------------------------------------------------------------------------------------------------------------------------------------------------------------------------------------------------------------------------------------------------------------------------------------------------------------------------------------------------------------------------------------------------------------------------------------------------------------------------------------------|-------|----------|----------|------------------------------|---------------------|
| chr3 | 123494927 | 123494927 | C | A | HACD2  | exonic | nonsynonymous SNV | HACD2:NM_001329786:exon6:c.G393T:p.K131N,HACD2:NM_001329787:exon7:c.G393T:p.K131N,HACD2:NM_198402:exon7:c.G726T:p.K242N,HACD2:NM_001329783:exon8:c.G795T:p.K265N,HACD2:NM_001329784:exon9:c.G447T:p.K149N<br>MYLK:NM_053031:exon2:c.G91A:p.V31M,MYLK:NM_053032:exon2:c.G94A:p.V32M,MYLK:NM_053028:exon31:c.G5014A:p.V1672M,MYLK:NM_001321309:exon32:c.G4846A:p.V1616M,MYLK:NM_053026:exon32:c.G5167A:p.V1723M,MYLK:NM_053027:exon32:c.G5221A:p.V1741M,MYLK:NM_053025:exon33:c.G5374A:p.V1792M | 1.76  |          |          | Fam64_f_m_aM                 | 0/1;0/0/0/1         |
| chr3 | 123618765 | 123618765 | C | T | MYLK   | exonic | nonsynonymous SNV | 14A:p.V1672M,MYLK:NM_001321309:exon32:c.G4846A:p.V1616M,MYLK:NM_053026:exon32:c.G5167A:p.V1723M,MYLK:NM_053027:exon32:c.G5221A:p.V1741M,MYLK:NM_053025:exon33:c.G5374A:p.V1792M                                                                                                                                                                                                                                                                                                               | 1.799 |          | 3.35E-05 | Fam67_f_m_aM_uF              | 0/1;0/0/0/1;0/0     |
| chr3 | 124730495 | 124730495 | G | C | UMPS   | exonic | nonsynonymous SNV | UMPS:NM_000373:exon1:c.G24C:p.L8F                                                                                                                                                                                                                                                                                                                                                                                                                                                             | 2.173 |          | 2.23E-05 | Fam91_m_aM_dM_aM_dM          | 0/1;0/1;0/0/0/1;0/0 |
| chr3 | 126475240 | 126475240 | T | C | ZXDC   | exonic | nonsynonymous SNV | ZXDC:NM_001040653:exon1:c.A626G:p.K209R,ZXDC:NM_025112:exon1:c.A626G:p.K209R                                                                                                                                                                                                                                                                                                                                                                                                                  | 1.818 | 0.001    | 0.0008   | 0.0006 Fam94_f_m_aM          | 0/0;0/1;0/1         |
| chr3 | 126542046 | 126542046 | G | A | CHST13 | exonic | nonsynonymous SNV | CHST13:NM_152889:exon3:c.G494A:p.R165H                                                                                                                                                                                                                                                                                                                                                                                                                                                        | 1.884 |          | 2.61E-05 | Fam42_f_m_aM_uF              | 0/0;0/1;0/1;0/0     |
| chr3 | 126542448 | 126542448 | C | T | CHST13 | exonic | nonsynonymous SNV | CHST13:NM_152889:exon3:c.C896T:p.A299V                                                                                                                                                                                                                                                                                                                                                                                                                                                        | 1.089 |          |          | 6.99E-06 Fam36_f_m_aM_uM     | 0/0;0/1;0/1;0/1     |
| chr3 | 127030357 | 127030357 | G | T | PLXNA1 | exonic | nonsynonymous SNV | PLXNA1:NM_032242:exon28:c.G5176T:p.A17265                                                                                                                                                                                                                                                                                                                                                                                                                                                     | 2.031 |          |          | Fam121_f_m_aF_aM             | 0/1;0/0/0/1;0/1     |
| chr3 | 127033955 | 127033955 | C | T | PLXNA1 | exonic | nonsynonymous SNV | PLXNA1:NM_032242:exon31:c.C5629T:p.R1877W                                                                                                                                                                                                                                                                                                                                                                                                                                                     | 2.066 |          | 3.54E-05 | Fam97_f_m_aM_aF              | 0/0;0/1;0/1;0/0     |
| chr3 | 127033971 | 127033971 | G | A | PLXNA1 | exonic | nonsynonymous SNV | PLXNA1:NM_032242:exon31:c.G5645A:p.R1882Q                                                                                                                                                                                                                                                                                                                                                                                                                                                     | 1.838 |          | 3.44E-05 | 6.98E-06 Fam14_f_m_aM_aM     | 0/1;0/0/0/1;0/1     |
| chr3 | 127608455 | 127608455 | G | A | MCM2   | exonic | nonsynonymous SNV | MCM2:NM_004526:exon7:c.G1175A:p.R392H                                                                                                                                                                                                                                                                                                                                                                                                                                                         | 1.222 |          | 0.0003   | 2.09E-05 Fam15_f_m_aM_aM     | 0/1;0/0/0/0/0/1     |
| chr3 | 129557129 | 129557129 | G | A | PLXND1 | exonic | nonsynonymous SNV | PLXND1:NM_015103:exon34:c.C5540T:p.P1847L                                                                                                                                                                                                                                                                                                                                                                                                                                                     | 1.656 |          | 1.12E-05 | Fam30_f_m_aM_uM              | 0/1;0/0/0/1;0/0     |
| chr3 | 129605486 | 129605486 | G | C | PLXND1 | exonic | nonsynonymous SNV | PLXND1:NM_015103:exon1:c.C1154G:p.P385R                                                                                                                                                                                                                                                                                                                                                                                                                                                       | 1.225 |          | 3.50E-05 | Fam59_f_m_aF_uM              | 0/0;0/1;0/1;0/0     |
| chr3 | 129605646 | 129605646 | T | G | PLXND1 | exonic | nonsynonymous SNV | PLXND1:NM_015103:exon1:c.A994C:p.K332Q                                                                                                                                                                                                                                                                                                                                                                                                                                                        | 2.251 |          |          | Fam26_f_m_aM_uM              | 0/1;0/0/0/1;0/1     |
| chr3 | 129606285 | 129606285 | G | T | PLXND1 | exonic | nonsynonymous SNV | PLXND1:NM_015103:exon1:c.C355A:p.R1195                                                                                                                                                                                                                                                                                                                                                                                                                                                        | 1.292 |          |          | Fam39_f_m_aM                 | 0/0;0/1;0/1         |
| chr3 | 130733634 | 130733634 | T | C | PIK3R4 | exonic | nonsynonymous SNV | PIK3R4:NM_014602:exon4:c.A1364G:p.D455G                                                                                                                                                                                                                                                                                                                                                                                                                                                       | 1.636 |          |          | Fam13_f_m_aM                 | 0/0;0/1;0/1         |
| chr3 | 130744696 | 130744696 | G | C | PIK3R4 | exonic | nonsynonymous SNV | PIK3R4:NM_014602:exon2:c.C523G:p.L175V                                                                                                                                                                                                                                                                                                                                                                                                                                                        | 1.033 |          |          | Fam83_f_m_aF                 | 0/0;0/1;0/1         |
| chr3 | 131381907 | 131381907 | C | A | NUDT16 | exonic | nonsynonymous SNV | NUDT16:NM_001171906:exon1:c.C103A:p.L35I,NUDT16:NM_152395:exon1:c.C103A:p.L35I                                                                                                                                                                                                                                                                                                                                                                                                                | 1.273 |          |          | Fam31_f_m_aM_uF              | 0/1;0/0/0/1;0/1     |
| chr3 | 135249409 | 135249409 | G | A | EPHB1  | exonic | nonsynonymous SNV | EPHB1:NM_004441:exon15:c.G2764A:p.A922T<br>ARMC8:NM_001282342:exon3:c.G157A:p.E53K,ARMC8:NM_001267041:exon4:c.G283A:p.E95K,ARMC8:NM_001267042:exon4:c.G283A:p.E95K,ARMC8:NM_001363941:exon4:c.G283A:p.E95K,ARMC8:NM_001363942:exon4:c.G157A:p.E53K,ARMC8:NM_014154:exon5:c.G241A:p.E81K,ARMC8:NM_015396:exon5:c.G241A:p.E81K,ARMC8:NM_213654:exon5:c.G241A:p.E81K                                                                                                                             | 1.268 |          | 0.0002   | 6.98E-06 Fam51_f_m_aM_uF     | 0/0;0/1;0/1;0/1     |
| chr3 | 138223477 | 138223477 | G | A | ARMC8  | exonic | nonsynonymous SNV | ARMC8:NM_001282342:exon3:c.G157A:p.E53K,ARMC8:NM_001267041:exon4:c.G283A:p.E95K,ARMC8:NM_001267042:exon4:c.G283A:p.E95K,ARMC8:NM_001363941:exon4:c.G283A:p.E95K,ARMC8:NM_001363942:exon4:c.G157A:p.E53K,ARMC8:NM_014154:exon5:c.G241A:p.E81K,ARMC8:NM_015396:exon5:c.G241A:p.E81K,ARMC8:NM_213654:exon5:c.G241A:p.E81K                                                                                                                                                                        | 1.31  |          | 1.12E-05 | 6.98E-06 Fam15_f_m_aM_aM     | 0/0;0/1;0/0/0/1     |
| chr3 | 138714532 | 138714532 | G | A | PIK3CB | exonic | nonsynonymous SNV | PIK3CB:NM_006219:exon9:c.C1238T:p.T413M                                                                                                                                                                                                                                                                                                                                                                                                                                                       | 1.234 |          | 3.27E-05 | Fam116_f_m_aM_aF             | 0/1;0/0/0/1;0/1     |
| chr3 | 141444040 | 141444040 | C | G | ZBTB38 | exonic | nonsynonymous SNV | ZBTB38:NM_001350100:exon4:c.C1652G:p.T551R,ZBTB38:NM_001350099:exon6:c.C1652G:p.T551R,ZBTB38:NM_001080412:exon8:c.C1652G:p.T551R                                                                                                                                                                                                                                                                                                                                                              | 1.302 |          |          | Fam24_f_m_aM_aM              | 0/0;0/1;0/1;0/0     |
| chr3 | 141445797 | 141445797 | G | C | ZBTB38 | exonic | nonsynonymous SNV | ZBTB38:NM_001350100:exon4:c.G3409C:p.A1137P,ZBTB38:NM_001350099:exon6:c.C1652G:p.T551R,ZBTB38:NM_001080412:exon8:c.G3409C:p.A1137P                                                                                                                                                                                                                                                                                                                                                            | 1.436 | 0.0004   | 0.0002   | 0.0001 Fam57_f_m_aM_uF       | 0/0;0/1;0/1;0/1     |
| chr3 | 141608540 | 141608540 | T | A | RASA2  | exonic | nonsynonymous SNV | RASA2:NM_001303245:exon21:c.T2071A:p.C691S,RASA2:NM_000506:exon21:c.T2068A:p.C690S,RASA2:NM_001303246:exon22:c.T2080A:p.C694S                                                                                                                                                                                                                                                                                                                                                                 | 1.234 |          | 1.12E-05 | Fam20_f_m_aM_uF              | 0/0;0/1;0/1;0/1     |
| chr3 | 142459258 | 142459258 | A | G | ATR    | exonic | nonsynonymous SNV | ATR:NM_001354579:exon42:c.T7126C:p.F2376L,ATR:NM_001184:exon43:c.T7318C:p.F2440L                                                                                                                                                                                                                                                                                                                                                                                                              | 1.765 |          |          | Fam18_f_m_aM_uF              | 0/0;0/1;0/1;0/0     |
| chr3 | 142780946 | 142780946 | G | A | TRPC1  | exonic | nonsynonymous SNV | TRPC1:NM_003304:exon5:c.G775A:p.E259K,TRPC1:NM_001251845:exon6:c.G877A:p.E293K                                                                                                                                                                                                                                                                                                                                                                                                                | 1.44  | 7.35E-05 |          | 1.40E-05 Fam6_f_m_aM         | 0/1;0/0/0/1         |
| chr3 | 142962783 | 142962783 | G | C | PAQR9  | exonic | nonsynonymous SNV | PAQR9:NM_198504:exon1:c.C554G:p.A185G                                                                                                                                                                                                                                                                                                                                                                                                                                                         | 1.817 |          | 0.0001   | 2.79E-05 Fam118_f_m_aM_aF_uM | 0/0;0/1;0/1;0/0/0/1 |
| chr3 | 143989627 | 143989627 | A | T | DIPK2A | exonic | nonsynonymous SNV | DIPK2A:NM_001134470:exon3:c.A452T:p.Y151F,DIPK2A:NM_001363944:exon3:c.A365T:p.Y122F,DIPK2A:NM_173552:exon3:c.A1079T:p.Y360F                                                                                                                                                                                                                                                                                                                                                                   | 1.309 |          |          | Fam68_f_m_aF_uF_uM           | 0/0;0/1;0/1;0/1;0/0 |
| chr3 | 147396245 | 147396245 | C | T | ZIC4   | exonic | nonsynonymous SNV | ZIC4:NM_001168378:exon3:c.G445A:p.G149R,ZIC4:NM_001168379:exon3:c.G409A:p.G137R,ZIC4:NM_032153:exon3:c.G295A:p.G99R                                                                                                                                                                                                                                                                                                                                                                           | 1.566 |          |          | 1.40E-05 Fam121_f_m_aF_aM    | 0/1;0/0/0/1;0/1     |
| chr3 | 149751431 | 149751431 | T | C | COMMD2 | exonic | nonsynonymous SNV | COMMD2:NM_016094:exon3:c.A200G:p.Y67C                                                                                                                                                                                                                                                                                                                                                                                                                                                         | 1.246 | 0.001    | 0.0007   | 0.0003 Fam40_f_m_aM_aM       | 0/0;0/1;0/1;0/1     |
| chr3 | 149751431 | 149751431 | T | C | COMMD2 | exonic | nonsynonymous SNV | COMMD2:NM_016094:exon3:c.A200G:p.Y67C                                                                                                                                                                                                                                                                                                                                                                                                                                                         | 1.246 | 0.001    | 0.0007   | 0.0003 Fam6_f_m_aM           | 0/1;0/0/0/1         |
| chr3 | 150762770 | 150762770 | G | C | SIAH2  | exonic | nonsynonymous SNV | SIAH2:NM_005067:exon1:c.C80G:p.P27R                                                                                                                                                                                                                                                                                                                                                                                                                                                           | 1.01  | 0.0005   | 0.0005   | 0.0005 Fam117_f_m_aM_aF      | 0/1;0/0/0/1;0/0     |
| chr3 | 151188477 | 151188477 | T | G | MED12L | exonic | nonsynonymous SNV | MED12L:NM_053002:exon12:c.T1750G:p.L584V<br>PLCH1:NM_014996:exon21:c.G2759T:p.G920V,PLCH1:NM_001130960:exon22:c.G2783T:p.G928V,PLCH1:NM_001130961:exon22:c.G2783T:p.G928V,PLCH1:NM_001349250:exon22:c.G2783T:p.G928V,PLCH1:NM_001349251:exon22:c.G2759T:p.G920V,PLCH1:NM_001349252:exon23:c.G2819T:p.G940V                                                                                                                                                                                    | 1.217 |          |          | Fam14_f_m_aM_aM              | 0/0;0/1;0/1;0/0     |
| chr3 | 155485571 | 155485571 | C | A | PLCH1  | exonic | nonsynonymous SNV | PLCH1:NM_001130960:exon22:c.G2783T:p.G928V,PLCH1:NM_001130961:exon22:c.G2783T:p.G928V,PLCH1:NM_001349250:exon22:c.G2783T:p.G928V,PLCH1:NM_001349251:exon22:c.G2759T:p.G920V,PLCH1:NM_001349252:exon23:c.G2819T:p.G940V<br>PLCH1:NM_001130960:exon15:c.T1879A:p.S627T,PLCH1:NM_001130961:exon15:c.T1879A:p.S627T,PLCH1:NM_001349250:exon15:c.T1879A:p.S627T,PLCH1:NM_014996:exon15:c.T1915A:p.S639T,PLCH1:NM_001349251:exon16:c.T1915A:p.S639T,PLCH1:NM_001349252:exon16:c.T1915A:p.S639T      | 1.307 |          |          | Fam92_f_m_aM_raM             | 0/0;0/0/0/0/0/1     |
| chr3 | 155494497 | 155494497 | A | T | PLCH1  | exonic | nonsynonymous SNV | PLCH1:NM_001130960:exon15:c.T1879A:p.S627T,PLCH1:NM_001130961:exon15:c.T1879A:p.S627T,PLCH1:NM_001349250:exon15:c.T1879A:p.S627T,PLCH1:NM_014996:exon15:c.T1915A:p.S639T,PLCH1:NM_001349251:exon16:c.T1915A:p.S639T,PLCH1:NM_001349252:exon16:c.T1915A:p.S639T                                                                                                                                                                                                                                | 1.108 | 0.0003   | 0.0009   | 9.88E-05 Fam108_f_m_aM       | 0/0;0/1;0/1         |

|      |           |           |   |   |                   |        |                   |                                                                                                                                                                                                                                                                                                                                                                                                                                                                                                                                                                                                                                     |       |          |          |          |                      |                     |
|------|-----------|-----------|---|---|-------------------|--------|-------------------|-------------------------------------------------------------------------------------------------------------------------------------------------------------------------------------------------------------------------------------------------------------------------------------------------------------------------------------------------------------------------------------------------------------------------------------------------------------------------------------------------------------------------------------------------------------------------------------------------------------------------------------|-------|----------|----------|----------|----------------------|---------------------|
| chr3 | 159866202 | 159866202 | G | A | IQCJ-SCHIP1;SCHII | exonic | nonsynonymous SNV | SCHIP1:NM_001197108:exon2:c.G103A:p.A35T,SCHIP1:NM_001197109:exon2:c.G70A:p.A24T,SCHIP1:NM_001197107:exon3:c.G760A:p.A254T,SCHIP1:NM_014575:exon3:c.G799A:p.A267T,IQCJ-SCHIP1:NM_001197114:exon5:c.G946A:p.A316T,IQCJ-SCHIP1:NM_001197113:exon6:c.G1027A:p.A343T                                                                                                                                                                                                                                                                                                                                                                    | 1.172 |          |          |          | Fam76_f_m_aM_uM      | 0/0;0/1;0/1;0/0     |
| chr3 | 169966855 | 169966855 | C | G | SEC62             | exonic | nonsynonymous SNV | SEC62:NM_003262:exon1:c.C33G:p.I11M                                                                                                                                                                                                                                                                                                                                                                                                                                                                                                                                                                                                 | 1.038 | 0.0004   | 0.0005   | 0.0003   | Fam82_f_m_aM_uF      | 0/1;0/0;0/1;0/1     |
| chr3 | 171110795 | 171110795 | T | G | TNIK              | exonic | nonsynonymous SNV | TNIK:NM_001161565:exon17:c.A1951C:p.T651P,TNIK:NM_001161566:exon17:c.A1951C:p.T651P,TNIK:NM_001161561:exon18:c.A2116C:p.T706P,TNIK:NM_001161562:exon18:c.A2116C:p.T706P,TNIK:NM_001161563:exon18:c.A2038C:p.T680P,TNIK:NM_001161564:exon18:c.A2038C:p.T680P,TNIK:NM_001161560:exon19:c.A2203C:p.T735P,TNIK:NM_015028:exon19:c.A2203C:p.T735P                                                                                                                                                                                                                                                                                        | 1.191 | 7.35E-05 | 9.71E-05 | 2.79E-05 | Fam47_f_m_aM         | 0/1;0/0;0/1         |
| chr3 | 173605072 | 173605072 | A | G | NLGN1             | exonic | nonsynonymous SNV | NLGN1:NM_001365923:exon2:c.A474G:p.I158M,NLGN1:NM_001365924:exon2:c.A474G:p.I158M,NLGN1:NM_001365925:exon2:c.A474G:p.I158M,NLGN1:NM_001365926:exon2:c.A474G:p.I158M,NLGN1:NM_001365927:exon2:c.A474G:p.I158M,NLGN1:NM_001365928:exon2:c.A474G:p.I158M,NLGN1:NM_001365929:exon2:c.A474G:p.I158M,NLGN1:NM_001365930:exon2:c.A474G:p.I158M,NLGN1:NM_001365931:exon2:c.A474G:p.I158M,NLGN1:NM_001365932:exon2:c.A474G:p.I158M,NLGN1:NM_001365933:exon2:c.A474G:p.I158M,NLGN1:NM_001365934:exon2:c.A474G:p.I158M,NLGN1:NM_001365935:exon2:c.A474G:p.I158M,NLGN1:NM_001365936:exon2:c.A474G:p.I158M,NLGN1:NM_014932:exon3:c.A474G:p.I158M | 1.122 |          | 0.0009   | 3.49E-05 | Fam17_f_m_aM_uM      | 0/1;0/0;0/1;0/1     |
| chr3 | 179416548 | 179416548 | A | C | GNB4              | exonic | nonsynonymous SNV | GNB4:NM_021629:exon5:c.T12G:p.V71G                                                                                                                                                                                                                                                                                                                                                                                                                                                                                                                                                                                                  | 1.711 |          |          |          | Fam59_f_m_aF_uM      | 0/0;0/1;0/1;0/1     |
| chr3 | 179708954 | 179708954 | G | C | USP13             | exonic | nonsynonymous SNV | USP13:NM_003940:exon6:c.G802C:p.A268P                                                                                                                                                                                                                                                                                                                                                                                                                                                                                                                                                                                               | 1.126 |          | 1.12E-05 |          | Fam112_f_m_aM        | 0/0;0/1;0/1         |
| chr3 | 179721530 | 179721530 | C | G | USP13             | exonic | nonsynonymous SNV | USP13:NM_003940:exon8:c.C1029G:p.N343K                                                                                                                                                                                                                                                                                                                                                                                                                                                                                                                                                                                              | 1.044 |          | 1.12E-05 |          | Fam60_f_m_aF         | 0/0;0/1;0/1         |
| chr3 | 179764014 | 179764014 | C | T | USP13             | exonic | nonsynonymous SNV | USP13:NM_003940:exon18:c.C2105T:p.P702L                                                                                                                                                                                                                                                                                                                                                                                                                                                                                                                                                                                             | 1.008 |          | 1.13E-05 | 1.40E-05 | Fam96_f_m_aM_uF      | 0/1;0/0;0/1;0/0     |
| chr3 | 181712424 | 181712424 | G | A | SOX2              | exonic | nonsynonymous SNV | SOX2:NM_003106:exon1:c.G64A:p.G225                                                                                                                                                                                                                                                                                                                                                                                                                                                                                                                                                                                                  | 1.242 | 7.38E-05 | 7.81E-05 | 0.0001   | Fam84_f_m_aF         | 0/1;0/0;0/1         |
| chr3 | 184165486 | 184165486 | A | G | DVL3              | exonic | nonsynonymous SNV | DVL3:NM_004423:exon7:c.A758G:p.N2535                                                                                                                                                                                                                                                                                                                                                                                                                                                                                                                                                                                                | 1.503 | 0.0002   | 0.0002   | 0.0002   | Fam122_f_m_aM        | 0/0;0/1;0/1         |
| chr3 | 184165486 | 184165486 | A | G | DVL3              | exonic | nonsynonymous SNV | DVL3:NM_004423:exon7:c.A758G:p.N2535                                                                                                                                                                                                                                                                                                                                                                                                                                                                                                                                                                                                | 1.503 | 0.0002   | 0.0002   | 0.0002   | Fam69_f_m_aM         | 0/0;0/1;0/1         |
| chr3 | 184237338 | 184237338 | T | C | VWA5B2            | exonic | nonsynonymous SNV | VWA5B2:NM_001320373:exon9:c.T989C:p.L330P,VWA5B2:NM_138345:exon11:c.T1646C:p.L549P                                                                                                                                                                                                                                                                                                                                                                                                                                                                                                                                                  | 2.04  |          |          |          | Fam12_f_m_aM_uM_aM   | 0/1;0/0;0/1;0/1;0/0 |
| chr3 | 184327296 | 184327296 | G | A | EIF4G1            | exonic | nonsynonymous SNV | EIF4G1:NM_004953:exon17:c.G2924A:p.R975H,EIF4G1:NM_198242:exon20:c.G3017A:p.R1006H,EIF4G1:NM_198244:exon21:c.G3248A:p.R1083H,EIF4G1:NM_182917:exon23:c.G3512A:p.R1171H,EIF4G1:NM_001194947:exon24:c.G3530A:p.R1177H,EIF4G1:NM_001291157:exon24:c.G3389A:p.R1130H,EIF4G1:NM_198241:exon24:c.G3509A:p.R1170H,EIF4G1:NM_001194946:exon25:c.G3530A:p.R1177H                                                                                                                                                                                                                                                                             | 1.061 | 0.0001   | 0.0006   | 1.40E-05 | Fam35_f_m_aF_uM      | 0/1;0/0;0/1;0/1     |
| chr3 | 184344707 | 184344707 | C | G | FAM131A           | exonic | nonsynonymous SNV | FAM131A:NM_001366133:exon5:c.C583G:p.L195V,FAM131A:NM_001171093:exon6:c.C583G:p.L195V,FAM131A:NM_144635:exon6:c.C838G:p.L280V,FAM131A:NM_001366134:exon7:c.C583G:p.L195V                                                                                                                                                                                                                                                                                                                                                                                                                                                            | 1.19  | 0.0007   | 0.0003   | 0.0002   | Fam70_f_m_aM         | 0/0;0/1;0/1         |
| chr3 | 184386125 | 184386125 | C | T | CHRD              | exonic | nonsynonymous SNV | CHRD:NM_001304472:exon15:c.C1898T:p.T633I,CHRD:NM_001304474:exon15:c.C788T:p.T263I,CHRD:NM_003741:exon15:c.C1898T:p.T633I,CHRD:NM_001304473:exon16:c.C788T:p.T263I                                                                                                                                                                                                                                                                                                                                                                                                                                                                  | 1.068 | 0.0003   | 0.0008   | 0.0003   | Fam66_f_m_aM         | 0/0;0/1;0/1         |
| chr3 | 184579539 | 184579539 | C | T | EPHB3             | exonic | nonsynonymous SNV | EPHB3:NM_004443:exon10:c.C1864T:p.R622W                                                                                                                                                                                                                                                                                                                                                                                                                                                                                                                                                                                             | 1.66  |          |          |          | Fam100_f_m_aF        | 0/1;0/0;0/1         |
| chr3 | 185450055 | 185450055 | C | T | MAP3K13           | exonic | nonsynonymous SNV | MAP3K13:NM_001242317:exon5:c.C545T:p.T182M,MAP3K13:NM_004721:exon6:c.C1166T:p.T389M,MAP3K13:NM_001242314:exon7:c.C1166T:p.T389M                                                                                                                                                                                                                                                                                                                                                                                                                                                                                                     | 2.06  |          | 6.31E-05 | 1.40E-05 | Fam48_f_m_aM_uM      | 0/1;0/0;0/1;0/1     |
| chr3 | 185586417 | 185586417 | T | C | SENP2             | exonic | nonsynonymous SNV | SENP2:NM_021627:exon1:c.T4C:p.Y2H                                                                                                                                                                                                                                                                                                                                                                                                                                                                                                                                                                                                   | 1.438 |          |          | 6.98E-06 | Fam54_f_m_aM_uF      | 0/0;0/1;0/1;0/1     |
| chr3 | 186048727 | 186048727 | G | A | ETV5              | exonic | nonsynonymous SNV | ETV5:NM_004454:exon13:c.C1445T:p.P482L                                                                                                                                                                                                                                                                                                                                                                                                                                                                                                                                                                                              | 1.239 |          |          |          | Fam82_f_m_aM_uF      | 0/0;0/1;0/1;0/1     |
| chr3 | 186581462 | 186581462 | G | A | DNAJB11           | exonic | nonsynonymous SNV | DNAJB11:NM_016306:exon5:c.G548A:p.G183E                                                                                                                                                                                                                                                                                                                                                                                                                                                                                                                                                                                             | 1.768 |          |          |          | Fam112_f_m_aM_uM_aM  | 0/1;0/0;0/0;0/0;0/1 |
| chr3 | 186786601 | 186786601 | A | G | EIF4A2            | exonic | nonsynonymous SNV | EIF4A2:NM_001967:exon7:c.A727G:p.T243A                                                                                                                                                                                                                                                                                                                                                                                                                                                                                                                                                                                              | 1.688 |          |          |          | Fam110_f_m_aM_uM_uMs | 0/0;0/1;0/0;0/1;0/0 |
| chr3 | 187733578 | 187733578 | C | T | BCL6              | exonic | nonsynonymous SNV | BCL6:NM_001134738:exon2:c.G116A:p.S39N,BCL6:NM_001130845:exon3:c.G116A:p.S39N,BCL6:NM_001706:exon3:c.G116A:p.S39N                                                                                                                                                                                                                                                                                                                                                                                                                                                                                                                   | 1.114 |          | 9.83E-05 |          | Fam38_f_m_aM         | 0/1;0/0;0/1         |
| chr3 | 193617212 | 193617212 | C | - | OPA1              | exonic | stopgain          | OPA1:NM_015560:exon4:c.483delC:p.V163*,OPA1:NM_130834:exon4:c.483delC:p.V163*,OPA1:NM_130836:exon4:c.483delC:p.V163*,OPA1:NM_130837:exon4:c.483delC:p.V163*,OPA1:NM_001354664:exon5:c.111delC:p.V39*                                                                                                                                                                                                                                                                                                                                                                                                                                | 0.472 |          |          |          | Fam91_m_aM_dM_aM_dM  | 0/0;0/1;0/1;0/0;0/0 |
| chr3 | 193654936 | 193654936 | C | T | OPA1              | exonic | nonsynonymous SNV | OPA1:NM_130831:exon19:c.C1814T:p.A605V,OPA1:NM_015560:exon20:c.C1922T:p.A641V,OPA1:NM_130832:exon20:c.C1868T:p.A623V,OPA1:NM_130833:exon20:c.C1925T:p.A642V,OPA1:NM_001354663:exon21:c.C1553T:p.A518V,OPA1:NM_001354664:exon21:c.C1550T:p.A517V,OPA1:NM_130834:exon21:c.C1976T:p.A659V,OPA1:NM_130835:exon21:c.C1979T:p.A660V,OPA1:NM_130836:exon21:c.C2033T:p.A678V,OPA1:NM_130837:exon22:c.C2087T:p.A696V                                                                                                                                                                                                                         | 1.082 |          | 3.28E-05 |          | Fam62_f_m_aM_aM      | 0/0;0/1;0/1;0/1     |



|      |           |           |    |   |          |        |                     |                                                                                                                                                                                                                                                          |       |          |          |          |                        |                         |
|------|-----------|-----------|----|---|----------|--------|---------------------|----------------------------------------------------------------------------------------------------------------------------------------------------------------------------------------------------------------------------------------------------------|-------|----------|----------|----------|------------------------|-------------------------|
| chr3 | 195307311 | 195307311 | C  | T | ACAP2    | exonic | nonsynonymous SNV   | ACAP2:NM_012287:exon12:c.G922A;p.V308M                                                                                                                                                                                                                   | 1.655 | .        | .        | .        | Fam7_f_m_aM_aM_uM      | 0/0;0/1;0/1;0/0;0/0     |
| chr3 | 195883222 | 195883222 | G  | A | TNK2     | exonic | nonsynonymous SNV   | TNK2:NM_001010938:exon5:c.C616T;p.H206Y,TNK2:NM_01308046:exon5:c.C640T;p.H214Y,TNK2:NM_005781:exon5:c.C544T;p.H182Y                                                                                                                                      | 1.033 | 7.36E-05 | 2.24E-05 | .        | Fam79_f_m_aM_uM        | 0/0;0/1;0/1;0/0         |
| chr3 | 195888497 | 195888497 | T  | C | TNK2     | exonic | nonsynonymous SNV   | TNK2:NM_001010938:exon2:c.A188G;p.N635,TNK2:NM_005781:exon2:c.A92G;p.N315                                                                                                                                                                                | 1.075 | .        | 0.0002   | 1.40E-05 | Fam31_f_m_aM_uF        | 0/1;0/0;0/1;0/0         |
| chr3 | 195888509 | 195888509 | C  | T | TNK2     | exonic | nonsynonymous SNV   | TNK2:NM_001010938:exon2:c.G152A;p.R51Q,TNK2:NM_01308046:exon2:c.G176A;p.R59Q,TNK2:NM_005781:exon2:c.G80A;p.R27Q                                                                                                                                          | 1.116 | 0.0003   | 9.84E-05 | 4.89E-05 | Fam98_f_m_aM           | 0/1;0/0;0/1             |
| chr3 | 196306971 | 196306971 | T  | A | TCTEX1D2 | exonic | nonsynonymous SNV   | TCTEX1D2:NM_001351628:exon3:c.A289T;p.I97F,TCTEX1D2:NM_152773:exon3:c.A289T;p.I97F                                                                                                                                                                       | 1.502 | 0.0002   | 0.0005   | 0.0001   | Fam80_f_m_aM_uM        | 0/1;0/0;0/1;0/1         |
| chr3 | 196569241 | 196569241 | G  | A | FBXO45   | exonic | nonsynonymous SNV   | FBXO45:NM_001105573:exon1:c.G257A;p.S86N                                                                                                                                                                                                                 | 1.105 | .        | .        | 6.98E-06 | Fam89_f_m_aM           | 0/1;0/0;0/1             |
| chr4 | 1406108   | 1406108   | G  | A | NKX1-1   | exonic | nonsynonymous SNV   | NKX1-1:NM_001290079:exon1:c.C335T;p.A112V                                                                                                                                                                                                                | 1.09  | .        | .        | .        | Fam20_f_m_aM_uF        | 0/0;0/1;0/1;0/1         |
| chr4 | 1959555   | 1959555   | A  | C | NSD2     | exonic | nonsynonymous SNV   | NSD2:NM_001042424:exon17:c.A3070C;p.N1024H,NSD2:NM_133335:exon17:c.A3070C;p.N1024H,NSD2:NM_133331:exon18:c.A3070C;p.N1024H,NSD2:NM_133330:exon19:c.A3070C;p.N1024H                                                                                       | 1.607 | .        | .        | .        | Fam83_f_m_aF           | 0/1;0/0;0/1             |
| chr4 | 3206610   | 3206610   | C  | T | HTT      | exonic | nonsynonymous SNV   | HTT:NM_002111:exon43:c.C5833T;p.R1945W                                                                                                                                                                                                                   | 1.205 | 0.0001   | 4.49E-05 | 2.09E-05 | Fam28_f_m_aF_uF        | 0/1;0/0;0/1;0/0         |
| chr4 | 3207344   | 3207344   | G  | A | HTT      | exonic | nonsynonymous SNV   | HTT:NM_002111:exon45:c.G6139A;p.G2047R                                                                                                                                                                                                                   | 1.297 | 0.0002   | 0.0004   | 0.0002   | Fam48_f_m_aM_uM        | 0/1;0/0;0/1;0/1         |
| chr4 | 3223427   | 3223427   | A  | T | HTT      | exonic | nonsynonymous SNV   | HTT:NM_002111:exon55:c.A7492T;p.I2498F                                                                                                                                                                                                                   | 1.002 | .        | 3.53E-05 | 6.98E-06 | Fam100_f_m_aF          | 0/0;0/1;0/1             |
| chr4 | 5821831   | 5821831   | T  | G | CRMP1    | exonic | nonsynonymous SNV   | CRMP1:NM_001014809:exon14:c.A1990C;p.N664H,CRMP1:NM_001288661:exon14:c.A1642C;p.N548H,CRMP1:NM_01288662:exon14:c.A1630C;p.N544H,CRMP1:NM_001313:exon14:c.A1648C;p.N550H                                                                                  | 1.277 | .        | .        | .        | Fam84_f_m_aF           | 0/0;0/1;0/1             |
| chr4 | 6716314   | 6716314   | G  | C | BLOC1S4  | exonic | nonsynonymous SNV   | BLOC1S4:NM_018366:exon1:c.G105C;p.Q35H                                                                                                                                                                                                                   | 1.784 | .        | .        | .        | Fam97_f_m_aM_aF        | 0/1;0/0;0/0;0/1         |
| chr4 | 6716819   | 6716819   | A  | T | BLOC1S4  | exonic | nonsynonymous SNV   | BLOC1S4:NM_018366:exon1:c.A610T;p.T204S                                                                                                                                                                                                                  | 1.741 | .        | .        | .        | Fam101_f_m_aM          | 0/0;0/1;0/1             |
| chr4 | 8868064   | 8868064   | G  | A | HMX1     | exonic | nonsynonymous SNV   | HMX1:NM_018942:exon2:c.C676T;p.R226C                                                                                                                                                                                                                     | 2.368 | 0.0003   | 0.0001   | 0.0001   | Fam12_f_m_aM_uM_aM     | 0/1;0/0;0/1;0/1;0/1     |
| chr4 | 10445801  | 10445802  | CT | - | ZNF518B  | exonic | frameshift deletion | ZNF518B:NM_053042:exon3:c.527_528del;p.E176Vfs*17                                                                                                                                                                                                        | 0.552 | .        | .        | .        | Fam10_f_m_aM_uF        | 0/0;0/0;0/1;0/0         |
| chr4 | 15052491  | 15052491  | C  | T | CPEB2    | exonic | nonsynonymous SNV   | CPEB2:NM_001177384:exon5:c.C2173T;p.P725S,CPEB2:NM_182646:exon5:c.C2164T;p.P725S,CPEB2:NM_001177381:exon6:c.C2197T;p.P733S,CPEB2:NM_001177383:exon6:c.C2188T;p.P730S,CPEB2:NM_182485:exon6:c.C2254T;p.P752S,CPEB2:NM_001177382:exon7:c.C2278T;p.P760S    | 2.302 | .        | 3.33E-05 | .        | Fam37_f_m_aF_uM        | 0/1;0/0;0/1;0/1         |
| chr4 | 20532001  | 20532001  | A  | T | SLIT2    | exonic | nonsynonymous SNV   | SLIT2:NM_001289135:exon16:c.A1619T;p.E540V,SLIT2:NM_001289136:exon16:c.A1607T;p.E536V,SLIT2:NM_004787:exon17:c.A1631T;p.E544V                                                                                                                            | 1.125 | .        | 1.21E-05 | .        | Fam112_f_m_aM          | 0/0;0/1;0/1             |
| chr4 | 20618819  | 20618819  | G  | T | SLIT2    | exonic | nonsynonymous SNV   | SLIT2:NM_001289135:exon36:c.G4388T;p.G1463V,SLIT2:NM_001289136:exon36:c.G4376T;p.G1459V,SLIT2:NM_004787:exon37:c.G4400T;p.G1467V                                                                                                                         | 1.177 | 0.0002   | 0.0006   | 0.0002   | Fam11_f_m_aM_uM        | 0/0;0/1;0/1;0/1         |
| chr4 | 24799887  | 24799887  | C  | A | SOD3     | exonic | nonsynonymous SNV   | SOD3:NM_003102:exon2:c.C366A;p.S122R                                                                                                                                                                                                                     | 2.155 | .        | 0.0002   | 6.98E-05 | Fam78_f_m_aF_uM        | 0/0;0/1;0/1;0/1         |
| chr4 | 24876546  | 24876546  | C  | T | CCDC149  | exonic | nonsynonymous SNV   | CCDC149:NM_001130726:exon2:c.G215A;p.R72Q,CCDC149:NM_01330643:exon2:c.G215A;p.R72Q,CCDC149:NM_01330644:exon3:c.G50A;p.R17Q,CCDC149:NM_173463:exon3:c.G215A;p.R72Q                                                                                        | 1.435 | .        | 7.45E-05 | 4.19E-05 | Fam55_f_m_aM_aM_dM     | 0/0;0/1;0/1;0/0;0/1     |
| chr4 | 25019179  | 25019179  | G  | C | LG12     | exonic | nonsynonymous SNV   | LG12:NM_018176:exon5:c.C473G;p.S158C                                                                                                                                                                                                                     | 1.36  | 0.0001   | 4.51E-05 | 1.40E-05 | Fam73_f_m_aF_dM        | 0/1;0/0;0/1;0/0         |
| chr4 | 37631411  | 37631411  | T  | - | RELL1    | exonic | frameshift deletion | RELL1:NM_001085399:exon6:c.793delA;p.R265Efs*25,RELL1:NM_001085400:exon6:c.793delA;p.R265Efs*14                                                                                                                                                          | 0.471 | .        | .        | .        | Fam42_f_m_aM_uF        | 0/1;0/0;0/1;0/0         |
| chr4 | 39407716  | 39407716  | C  | G | KLB      | exonic | nonsynonymous SNV   | KLB:NM_175737:exon1:c.C767G;p.A256G                                                                                                                                                                                                                      | 1.567 | .        | .        | .        | Fam77_f_m_aM_aF_uM_uFs | 0/1;0/0;0/1;0/0;0/1;0/0 |
| chr4 | 40437963  | 40437963  | G  | C | RBM47    | exonic | nonsynonymous SNV   | RBM47:NM_001371113:exon3:c.C931G;p.L311V,RBM47:NM_001371114:exon3:c.C817G;p.L273V,RBM47:NM_019027:exon3:c.C931G;p.L311V,RBM47:NM_001098634:exon4:c.C931G;p.L311V                                                                                         | 1.203 | .        | .        | .        | Fam55_f_m_aM_aM_dM     | 0/0;0/1;0/1;0/0;0/1     |
| chr4 | 41013700  | 41013701  | CT | - | APBB2    | exonic | frameshift deletion | APBB2:NM_001330658:exon5:c.717_718del;p.A241Qfs*17,APBB2:NM_001166050:exon6:c.717_718del;p.A241Qfs*17,APBB2:NM_001330656:exon6:c.717_718del;p.A241Qfs*17,APBB2:NM_004307:exon6:c.717_718del;p.A241Qfs*17,APBB2:NM_173075:exon6:c.717_718del;p.A241Qfs*17 | 0.541 | .        | 3.27E-05 | .        | Fam117_f_m_aM_aF       | 0/1;0/0;0/0;0/1         |
| chr4 | 41014332  | 41014332  | C  | G | APBB2    | exonic | nonsynonymous SNV   | APBB2:NM_001330658:exon5:c.G86C;p.R29P,APBB2:NM_001166050:exon6:c.G86C;p.R29P,APBB2:NM_001330656:exon6:c.G86C;p.R29P,APBB2:NM_004307:exon6:c.G86C;p.R29P,APBB2:NM_173075:exon6:c.G86C;p.R29P                                                             | 1.234 | .        | .        | .        | Fam108_f_m_aM          | 0/0;0/1;0/1             |
| chr4 | 41745878  | 41745878  | C  | A | PHOX2B   | exonic | nonsynonymous SNV   | PHOX2B:NM_003924:exon3:c.G874T;p.A292S                                                                                                                                                                                                                   | 1.048 | .        | .        | .        | Fam5_f_m_aM            | 0/0;0/1;0/1             |
| chr4 | 41982099  | 41982099  | A  | - | DCAF4L1  | exonic | frameshift deletion | DCAF4L1:NM_001029955:exon1:c.307delA;p.S103Afs*5                                                                                                                                                                                                         | 0.295 | .        | .        | 6.98E-06 | Fam31_f_m_aM_uF        | 0/1;0/0;0/1;0/0         |
| chr4 | 42586451  | 42586451  | T  | C | ATP8A1   | exonic | nonsynonymous SNV   | ATP8A1:NM_001105529:exon9:c.A620G;p.K207R,ATP8A1:NM_006095:exon9:c.A620G;p.K207R                                                                                                                                                                         | 1.148 | .        | 1.12E-05 | .        | Fam1_f_m_aM            | 0/1;0/0;0/1             |
| chr4 | 48145475  | 48145475  | C  | A | TEC      | exonic | nonsynonymous SNV   | TEC:NM_003215:exon13:c.G1186T;p.A396S                                                                                                                                                                                                                    | 1.06  | .        | 4.47E-05 | .        | Fam113_f_m_aF_raM_uF   | 0/1;0/0;0/0;0/1;0/1     |
| chr4 | 54101864  | 54101864  | A  | T | GSX2     | exonic | nonsynonymous SNV   | GSX2:NM_133267:exon2:c.A857T;p.D286V                                                                                                                                                                                                                     | 1.887 | .        | .        | .        | Fam70_f_m_aM           | 0/1;0/0;0/1             |
| chr4 | 55089802  | 55089802  | C  | T | KDR      | exonic | nonsynonymous SNV   | KDR:NM_002253:exon24:c.G3193A;p.A1065T                                                                                                                                                                                                                   | 2.204 | 0.0003   | 0.0003   | 0.0004   | Fam123_f_aF            | 0/1;0/1                 |
| chr4 | 56327781  | 56327781  | G  | T | KIAA1211 | exonic | nonsynonymous SNV   | KIAA1211:NM_020722:exon11:c.G3679T;p.D1227Y                                                                                                                                                                                                              | 1.042 | .        | .        | .        | Fam68_f_m_aF_uF_uM     | 0/0;0/1;0/1;0/1;0/0     |
| chr4 | 57040840  | 57040840  | A  | C | IGFBP7   | exonic | nonsynonymous SNV   | IGFBP7:NM_001253835:exon2:c.T569G;p.V190G,IGFBP7:NM_001553:exon2:c.T569G;p.V190G                                                                                                                                                                         | 1.462 | .        | .        | .        | Fam62_f_m_aM_aM        | 0/0;0/1;0/1;0/1         |

|      |           |           |   |   |          |        |                   |                                                                                                                                                                                                                                           |       |          |          |          |                      |                     |
|------|-----------|-----------|---|---|----------|--------|-------------------|-------------------------------------------------------------------------------------------------------------------------------------------------------------------------------------------------------------------------------------------|-------|----------|----------|----------|----------------------|---------------------|
| chr4 | 70993909  | 70993909  | C | T | DKK      | exonic | nonsynonymous SNV | DKK:NM_000788:exon1:c.C74T;p.S25F                                                                                                                                                                                                         | 1.151 | .        | .        | 6.98E-06 | Fam117_f_m_aM_aF     | 0/1;0/0;0/1;0/0     |
| chr4 | 73125248  | 73125248  | T | C | ANKRD17  | exonic | nonsynonymous SNV | ANKRD17:NM_198889:exon16:c.A2546G;p.Q849R,ANKRD17:NM_001286771:exon17:c.A2960G;p.Q987R,ANKRD17:NM_015574:exon17:c.A3296G;p.Q1099R,ANKRD17:NM_032217:exon17:c.A3299G;p.Q1100R                                                              | 1.038 | .        | .        | .        | Fam76_f_m_aM_uM      | 0/1;0/0;0/1;0/1     |
| chr4 | 73142764  | 73142764  | G | C | ANKRD17  | exonic | nonsynonymous SNV | ANKRD17:NM_001286771:exon12:c.C1622G;p.A541G,ANKRD17:NM_015574:exon12:c.C1961G;p.A654G,ANKRD17:NM_032217:exon12:c.C1961G;p.A654G,ANKRD17:NM_198889:exon12:c.C1961G;p.A654G                                                                | 2.232 | .        | 3.55E-05 | .        | Fam11_f_m_aM_uM      | 0/1;0/0;0/1;0/0     |
| chr4 | 74446701  | 74446701  | T | G | AREG     | exonic | nonsynonymous SNV | AREG:NM_001657:exon2:c.T229G;p.S77A                                                                                                                                                                                                       | 2.209 | .        | .        | .        | Fam51_f_m_aM_uF      | 0/0;0/1;0/1;0/0     |
| chr4 | 75514219  | 75514219  | T | C | RCHY1    | exonic | nonsynonymous SNV | RCHY1:NM_001009922:exon1:c.A68G;p.Y23C,RCHY1:NM_001278536:exon1:c.A68G;p.Y23C,RCHY1:NM_001278537:exon1:c.A68G;p.Y23C,RCHY1:NM_015436:exon1:c.A68G;p.Y23C                                                                                  | 1.514 | .        | 1.12E-05 | .        | Fam110_f_m_aM_aM_uMs | 0/1;0/0;0/1;0/0;0/1 |
| chr4 | 76136389  | 76136389  | G | C | NUP54    | exonic | nonsynonymous SNV | NUP54:NM_001278603:exon3:c.C175G;p.P59A,NUP54:NM_017426:exon4:c.C319G;p.P107A                                                                                                                                                             | 1.075 | .        | .        | .        | Fam26_f_m_aM_uM      | 0/0;0/1;0/1;0/0     |
| chr4 | 76730823  | 76730823  | C | T | SHROOM3  | exonic | stopgain          | SHROOM3:NM_020859:exon4:c.C475T;p.R159X                                                                                                                                                                                                   | 0.449 | .        | 3.28E-05 | .        | Fam67_f_m_aM_uF      | 0/1;0/0;0/1;0/0     |
| chr4 | 76730824  | 76730824  | G | A | SHROOM3  | exonic | nonsynonymous SNV | SHROOM3:NM_020859:exon4:c.G476A;p.R159Q                                                                                                                                                                                                   | 1.115 | .        | 0.0002   | 1.40E-05 | Fam100_f_m_aF        | 0/0;0/1;0/1         |
| chr4 | 76739414  | 76739414  | A | G | SHROOM3  | exonic | nonsynonymous SNV | SHROOM3:NM_020859:exon5:c.G1241A;p.R414Q                                                                                                                                                                                                  | 1.119 | 7.34E-05 | 0.0007   | 7.68E-05 | Fam81_f_m_aM_uM      | 0/0;0/1;0/1;0/1     |
| chr4 | 84696034  | 84696034  | T | C | WDFY3    | exonic | nonsynonymous SNV | WDFY3:NM_014991:exon58:c.A8837G;p.N2946S                                                                                                                                                                                                  | 1.226 | .        | 0.0002   | 0.0001   | Fam40_f_m_aM_aM      | 0/0;0/1;0/1;0/0     |
| chr4 | 94276457  | 94276457  | C | T | SMARCAD1 | exonic | nonsynonymous SNV | SMARCAD1:NM_001254949:exon7:c.C637T;p.H213Y,SMARCAD1:NM_001128429:exon15:c.C1927T;p.H643Y,SMARCAD1:NM_001128430:exon15:c.C1927T;p.H643Y,SMARCAD1:NM_020159:exon15:c.C1927T;p.H643Y                                                        | 1.156 | 0.0008   | 0.001    | 0.0005   | Fam43_f_m_aM         | 0/0;0/1;0/1         |
| chr4 | 94276457  | 94276457  | C | T | SMARCAD1 | exonic | nonsynonymous SNV | SMARCAD1:NM_001254949:exon7:c.C637T;p.H213Y,SMARCAD1:NM_001128429:exon15:c.C1927T;p.H643Y,SMARCAD1:NM_001128430:exon15:c.C1927T;p.H643Y,SMARCAD1:NM_020159:exon15:c.C1927T;p.H643Y                                                        | 1.156 | 0.0008   | 0.001    | 0.0005   | Fam64_f_m_aM         | 0/0;0/1;0/1         |
| chr4 | 95335598  | 95335598  | A | G | UNC5C    | exonic | nonsynonymous SNV | UNC5C:NM_003728:exon2:c.T158C;p.F53S                                                                                                                                                                                                      | 1.021 | .        | .        | .        | Fam102_f_m_aM        | 0/1;0/0;0/1         |
| chr4 | 106925861 | 106925861 | C | T | DKK2     | exonic | nonsynonymous SNV | DKK2:NM_014421:exon2:c.G311A;p.R104Q                                                                                                                                                                                                      | 1.142 | .        | 0.0001   | 7.11E-05 | Fam45_f_m_aM_uF      | 0/1;0/0;0/1;0/1     |
| chr4 | 112265009 | 112265009 | C | A | AP1AR    | exonic | nonsynonymous SNV | AP1AR:NM_001128426:exon6:c.C283A;p.Q95K,AP1AR:NM_018569:exon7:c.C382A;p.Q128K                                                                                                                                                             | 1.298 | 0.0006   | 3.60E-05 | 7.00E-06 | Fam95_f_m_aM_aM_uF   | 0/1;0/0;0/1;0/1;0/0 |
| chr4 | 113902954 | 113902954 | G | A | ARSI     | exonic | nonsynonymous SNV | ARSI:NM_001354210:exon2:c.C1120T;p.L374F,ARSI:NM_024590:exon2:c.C1120T;p.L374F,ARSI:NM_001354211:exon6:c.C772T;p.L258F                                                                                                                    | 1.13  | .        | 3.37E-05 | 6.98E-06 | Fam84_f_m_aF         | 0/1;0/0;0/1         |
| chr4 | 113903650 | 113903650 | G | A | ARSI     | exonic | nonsynonymous SNV | ARSI:NM_001354210:exon2:c.C424T;p.H142Y,ARSI:NM_024590:exon2:c.C424T;p.H142Y,ARSI:NM_001354211:exon6:c.C76T;p.H26Y                                                                                                                        | 1.161 | .        | 3.29E-05 | 6.98E-06 | Fam17_f_m_aM_uM      | 0/1;0/0;0/1;0/0     |
| chr4 | 121818135 | 121818135 | G | A | CCNA2    | exonic | nonsynonymous SNV | CCNA2:NM_001237:exon7:c.C1159T;p.L387F                                                                                                                                                                                                    | 1.163 | .        | 6.55E-05 | 1.40E-05 | Fam66_f_m_aM         | 0/1;0/0;0/1         |
| chr4 | 121932635 | 121932635 | A | G | TRPC3    | exonic | nonsynonymous SNV | TRPC3:NM_003305:exon1:c.T404C;p.L135P,TRPC3:NM_01130698:exon2:c.T623C;p.L208P,TRPC3:NM_001366479:exon2:c.T623C;p.L208P                                                                                                                    | 1.645 | .        | .        | .        | Fam34_f_m_aM_uF      | 0/1;0/0;0/1;0/1     |
| chr4 | 122174642 | 122174642 | A | G | KIAA1109 | exonic | nonsynonymous SNV | KIAA1109:NM_015312:exon3:c.A283G;p.M95V                                                                                                                                                                                                   | 1.398 | 7.34E-05 | 0.0003   | 5.58E-05 | Fam105_f_m_aM        | 0/1;0/0;0/1         |
| chr4 | 140379628 | 140379628 | T | G | SCOC     | exonic | nonsynonymous SNV | SCOC:NM_001153484:exon3:c.T313G;p.L1105V,SCOC:NM_01153585:exon3:c.T202G;p.L68V,SCOC:NM_001153663:exon3:c.T310G;p.L1104V,SCOC:NM_001153446:exon4:c.T202G;p.L68V,SCOC:NM_001153635:exon4:c.T199G;p.L67V,SCOC:NM_032547:exon4:c.T202G;p.L68V | 1.223 | .        | 3.30E-05 | .        | Fam61_f_m_aM         | 0/1;0/0;0/1         |
| chr4 | 140634131 | 140634131 | C | T | TBC1D9   | exonic | nonsynonymous SNV | TBC1D9:NM_015130:exon16:c.G2563A;p.D855N                                                                                                                                                                                                  | 1.377 | .        | .        | .        | Fam64_f_m_aM         | 0/1;0/0;0/1         |
| chr4 | 140911345 | 140911345 | C | T | RNF150   | exonic | nonsynonymous SNV | RNF150:NM_020724:exon6:c.G997A;p.D333N                                                                                                                                                                                                    | 1.47  | 0.0003   | 0.0001   | 8.38E-05 | Fam49_f_m_aM         | 0/1;0/0;0/1         |
| chr4 | 145765711 | 145765711 | G | A | ZNF827   | exonic | nonsynonymous SNV | ZNF827:NM_001306215:exon12:c.C2888T;p.S963L,ZNF827:NM_178835:exon12:c.C2888T;p.S963L                                                                                                                                                      | 1.216 | 0.0006   | 0.0005   | 0.0002   | Fam43_f_m_aM         | 0/1;0/0;0/1         |
| chr4 | 146640437 | 146640437 | A | C | POU4F2   | exonic | nonsynonymous SNV | POU4F2:NM_004575:exon2:c.A859C;p.K287Q                                                                                                                                                                                                    | 1.46  | .        | 0.0001   | 2.79E-05 | Fam14_f_m_aM_aM      | 0/1;0/0;0/1;0/0     |
| chr4 | 147532698 | 147532698 | C | A | EDNRA    | exonic | nonsynonymous SNV | EDNRA:NM_001957:exon4:c.C741A;p.F247L                                                                                                                                                                                                     | 2.116 | .        | .        | .        | Fam15_f_m_aM_aM      | 0/0;0/1;0/1;0/1     |
| chr4 | 157359945 | 157359945 | C | T | GRIA2    | exonic | nonsynonymous SNV | GRIA2:NM_000826:exon13:c.C2093T;p.A698V,GRIA2:NM_001083619:exon13:c.C2093T;p.A698V,GRIA2:NM_001083620:exon13:c.C1952T;p.A651V                                                                                                             | 2.565 | 7.35E-05 | 0.0001   | 3.49E-05 | Fam7_f_m_aM_aM_uM    | 0/1;0/0;0/1;0/1;0/0 |
| chr4 | 163585848 | 163585848 | C | G | MARCHF1  | exonic | nonsynonymous SNV | MARCHF1:NM_017923:exon2:c.G273C;p.Q91H,MARCHF1:NM_001166373:exon6:c.G324C;p.Q108H                                                                                                                                                         | 1.149 | .        | 9.84E-05 | 1.40E-05 | Fam18_f_m_aM_uF      | 0/1;0/0;0/1;0/1     |
| chr4 | 169106897 | 169106897 | A | C | SH3RF1   | exonic | nonsynonymous SNV | SH3RF1:NM_020870:exon11:c.T2448G;p.C816W                                                                                                                                                                                                  | 1.279 | .        | .        | 7.00E-06 | Fam10_f_m_aM_uF      | 0/0;0/0;0/1;0/0     |
| chr4 | 170061947 | 170061947 | G | T | AADAT    | exonic | nonsynonymous SNV | AADAT:NM_016228:exon12:c.C1181A;p.P394H,AADAT:NM_001286682:exon13:c.C1193A;p.P398H,AADAT:NM_001286683:exon13:c.C1181A;p.P394H,AADAT:NM_182662:exon13:c.C1181A;p.P394H                                                                     | 1.068 | .        | .        | .        | Fam28_f_m_aF_uF      | 0/1;0/0;0/1;0/0     |
| chr4 | 176327163 | 176327163 | C | T | SPCS3    | exonic | nonsynonymous SNV | SPCS3:NM_021928:exon4:c.C296T;p.A99V                                                                                                                                                                                                      | 1.181 | .        | 9.68E-05 | 6.98E-06 | Fam85_f_m_aM_aM      | 0/0;0/1;0/0;0/1     |
| chr4 | 182796711 | 182796711 | G | T | TENM3    | exonic | nonsynonymous SNV | TENM3:NM_001080477:exon27:c.G7288T;p.D2430Y                                                                                                                                                                                               | 1.946 | .        | 9.08E-05 | 4.89E-05 | Fam12_f_m_aM_uM_aM   | 0/1;0/0;0/1;0/0;0/0 |
| chr4 | 183510632 | 183510632 | G | C | ING2     | exonic | nonsynonymous SNV | ING2:NM_001291959:exon2:c.G403C;p.D135H,ING2:NM_01564:exon2:c.G523C;p.D175H                                                                                                                                                               | 1.061 | .        | .        | .        | Fam92_f_m_aM_raM     | 0/0;0/1;0/1;0/0     |
| chr5 | 225527    | 225527    | T | C | SDHA     | exonic | nonsynonymous SNV | SDHA:NM_001330758:exon4:c.T421C;p.Y141H,SDHA:NM_004168:exon4:c.T421C;p.Y141H                                                                                                                                                              | 1.317 | .        | .        | .        | Fam116_f_m_aM_aF     | 0/0;0/1;0/1;0/1     |
| chr5 | 483327    | 483327    | A | T | SLC9A3   | exonic | nonsynonymous SNV | SLC9A3:NM_001284351:exon6:c.T1088A;p.I363N,SLC9A3:NM_004174:exon6:c.T1088A;p.I363N                                                                                                                                                        | 2.464 | .        | .        | .        | Fam105_f_m_aM        | 0/0;0/1;0/1         |
| chr5 | 485174    | 485174    | C | T | SLC9A3   | exonic | nonsynonymous SNV | SLC9A3:NM_001284351:exon4:c.G733A;p.V245M,SLC9A3:NM_004174:exon4:c.G733A;p.V245M                                                                                                                                                          | 1.736 | .        | 0.0002   | 4.19E-05 | Fam91_m_aM_dM_aM_dM  | 0/1;0/1;0/1;0/0;0/1 |
| chr5 | 491988    | 491988    | C | T | SLC9A3   | exonic | nonsynonymous SNV | SLC9A3:NM_001284351:exon2:c.G295A;p.V99I,SLC9A3:NM_004174:exon2:c.G295A;p.V99I                                                                                                                                                            | 1.617 | .        | 0.0001   | 9.21E-05 | Fam51_f_m_aM_uF      | 0/0;0/1;0/1;0/1     |

|      |          |          |   |   |          |        |                   |                                                                                                                                                                                                                                                                                                            |       |          |          |          |                              |                     |
|------|----------|----------|---|---|----------|--------|-------------------|------------------------------------------------------------------------------------------------------------------------------------------------------------------------------------------------------------------------------------------------------------------------------------------------------------|-------|----------|----------|----------|------------------------------|---------------------|
| chr5 | 1330378  | 1330378  | A | G | CLPTM1L  | exonic | nonsynonymous SNV | CLPTM1L:NM_030782:exon9:c.T982C:p.W328R                                                                                                                                                                                                                                                                    | 1.376 | .        | .        | .        | Fam83_f_m_aF                 | 0/0/0/1/0/1         |
| chr5 | 1411287  | 1411287  | C | T | SLC6A3   | exonic | nonsynonymous SNV | SLC6A3:NM_001044:exon9:c.G1225A:p.V409M                                                                                                                                                                                                                                                                    | 2.167 | 0.0003   | .        | .        | 2.09E-05 Fam107_f_m_aM       | 0/1/0/0/0/1         |
| chr5 | 1463784  | 1463784  | A | G | LPCAT1   | exonic | nonsynonymous SNV | LPCAT1:NM_024830:exon14:c.T1472C:p.L491P                                                                                                                                                                                                                                                                   | 1.736 | 7.35E-05 | .        | .        | 6.98E-06 Fam25_f_m_aM        | 0/1/0/0/0/1         |
| chr5 | 6616810  | 6616810  | C | A | NSUN2    | exonic | nonsynonymous SNV | NSUN2:NM_001193455:exon8:c.G833T:p.G278V,NSUN2:N M_017755:exon9:c.G938T:p.G313V                                                                                                                                                                                                                            | 1.987 | .        | .        | .        | Fam23_f_m_aM_dF_uFs          | 0/1/0/0/0/1/0/1/0/0 |
| chr5 | 6620158  | 6620158  | C | T | NSUN2    | exonic | nonsynonymous SNV | NSUN2:NM_001193455:exon6:c.G658A:p.G220S,NSUN2:N M_017755:exon7:c.G763A:p.G255S                                                                                                                                                                                                                            | 1.487 | .        | 0.0001   | .        | 2.79E-05 Fam107_f_m_aM       | 0/1/0/0/0/1         |
| chr5 | 9224866  | 9224866  | G | A | SEMA5A   | exonic | nonsynonymous SNV | SEMA5A:NM_003966:exon8:c.C454T:p.H152Y                                                                                                                                                                                                                                                                     | 1.115 | 7.35E-05 | 0.0001   | .        | 3.49E-05 Fam20_f_m_aM_uF     | 0/0/0/1/0/1/0/0     |
| chr5 | 11385187 | 11385187 | C | T | CTNND2   | exonic | nonsynonymous SNV | CTNND2:NM_001288715:exon6:c.G382A:p.A128T,CTNND2 :NM_001332:exon7:c.G655A:p.A219T                                                                                                                                                                                                                          | 1.659 | 0.0002   | .        | .        | 0.0002 Fam69_f_m_aM          | 0/0/0/1/0/1         |
| chr5 | 11385187 | 11385187 | C | T | CTNND2   | exonic | nonsynonymous SNV | CTNND2:NM_001288715:exon6:c.G382A:p.A128T,CTNND2 :NM_001332:exon7:c.G655A:p.A219T                                                                                                                                                                                                                          | 1.659 | 0.0002   | .        | .        | 0.0002 Fam79_f_m_aM_uM       | 0/0/0/1/0/1/0/1     |
| chr5 | 14769017 | 14769017 | C | T | ANKH     | exonic | nonsynonymous SNV | ANKH:NM_054027:exon2:c.G271A:p.V91M                                                                                                                                                                                                                                                                        | 1.521 | .        | 1.12E-05 | .        | Fam52_f_m_aM                 | 0/1/0/0/0/1         |
| chr5 | 24511455 | 24511455 | T | C | CDH10    | exonic | nonsynonymous SNV | CDH10:NM_001317224:exon6:c.A874G:p.K292E,CDH10:N M_001362460:exon6:c.A874G:p.K292E,CDH10:NM_00672 7:exon6:c.A874G:p.K292E                                                                                                                                                                                  | 1.569 | .        | 0.0004   | .        | 6.29E-05 Fam115_f_m_aF_aM_aF | 0/1/0/0/0/1/0/1/0/1 |
| chr5 | 32229920 | 32229920 | C | T | MTMR12   | exonic | nonsynonymous SNV | MTMR12:NM_001294344:exon14:c.G1772A:p.R591H,MT MR12:NM_001294343:exon15:c.G1940A:p.R647H,MTMR1 2:NM_001040446:exon16:c.G2102A:p.R701H                                                                                                                                                                      | 1.531 | .        | 0.0007   | .        | 4.19E-05 Fam53_f_m_aM        | 0/1/0/0/0/1         |
| chr5 | 36181858 | 36181858 | T | C | SKP2     | exonic | nonsynonymous SNV | SKP2:NM_001243120:exon8:c.T460C:p.F154L,SKP2:NM_00 5983:exon10:c.T1102C:p.F368L                                                                                                                                                                                                                            | 1.506 | .        | .        | .        | Fam38_f_m_aM                 | 0/0/0/1/0/1         |
| chr5 | 36241774 | 36241774 | G | T | NADK2    | exonic | nonsynonymous SNV | NADK2:NM_001085411:exon1:c.C25A:p.L9M                                                                                                                                                                                                                                                                      | 2.746 | .        | .        | .        | Fam61_f_m_aM                 | 0/0/0/1/0/1         |
| chr5 | 36671074 | 36671074 | G | A | SLC1A3   | exonic | nonsynonymous SNV | SLC1A3:NM_001289939:exon3:c.G227A:p.R76Q,SLC1A3:N M_001166695:exon4:c.G365A:p.R122Q,SLC1A3:NM_00128 9940:exon4:c.G365A:p.R122Q,SLC1A3:NM_004172:exon4: c.G365A:p.R122Q                                                                                                                                     | 1.341 | .        | 6.54E-05 | .        | 6.98E-06 Fam38_f_m_aM        | 0/0/0/1/0/1         |
| chr5 | 36679791 | 36679791 | G | A | SLC1A3   | exonic | nonsynonymous SNV | SLC1A3:NM_001289940:exon5:c.G689A:p.R230Q,SLC1A3: NM_001289939:exon6:c.G887A:p.R296Q,SLC1A3:NM_001 166695:exon7:c.G1025A:p.R342Q,SLC1A3:NM_004172:exo n7:c.G1025A:p.R342Q                                                                                                                                  | 1.203 | .        | 9.83E-05 | .        | 1.40E-05 Fam109_f_m_aM       | 0/0/0/1/0/1         |
| chr5 | 37024700 | 37024700 | A | G | NIPBL    | exonic | nonsynonymous SNV | NIPBL:NM_015384:exon30:c.A5690G:p.N1897S,NIPBL:NM _133433:exon30:c.A5690G:p.N1897S                                                                                                                                                                                                                         | 1.826 | 0.0003   | 0.0001   | .        | 6.98E-05 Fam66_f_m_aM        | 0/0/0/1/0/1         |
| chr5 | 40762833 | 40762833 | T | C | PRKAA1   | exonic | nonsynonymous SNV | PRKAA1:NM_001355029:exon8:c.A1193G:p.H398R,PRKAA 1:NM_001355035:exon8:c.A851G:p.H284R,PRKAA1:NM_0 01355036:exon8:c.A851G:p.H284R,PRKAA1:NM_00135503 7:exon9:c.A851G:p.H284R,PRKAA1:NM_006251:exon9:c.A 1625G:p.H542R,PRKAA1:NM_001355028:exon10:c.A1547G :p.H516R,PRKAA1:NM_206907:exon10:c.A1670G:p.H557R | 1.513 | .        | .        | .        | Fam49_f_m_aM                 | 0/1/0/0/0/1         |
| chr5 | 40777488 | 40777488 | T | C | PRKAA1   | exonic | nonsynonymous SNV | PRKAA1:NM_001355034:exon2:c.A226G:p.I76V,PRKAA1:N M_006251:exon2:c.A226G:p.I76V,PRKAA1:NM_206907:ex on2:c.A226G:p.I76V,PRKAA1:NM_001355028:exon3:c.A14 8G:p.I50V                                                                                                                                           | 1.496 | .        | 3.29E-05 | .        | Fam59_f_m_aF_uM              | 0/0/0/1/0/1/0/0     |
| chr5 | 57247151 | 57247151 | G | T | GPBP1    | exonic | nonsynonymous SNV | GPBP1:NM_001127236:exon7:c.G761T:p.G254V,GPBP1:N M_001203246:exon7:c.G227T:p.G76V,GPBP1:NM_001127 235:exon8:c.G761T:p.G254V,GPBP1:NM_022913:exon8:c. G740T:p.G247V,GPBP1:NM_001331037:exon9:c.G800T:p. G267V                                                                                               | 1.117 | 0.0003   | 0.0004   | 0.0003   | Fam79_f_m_aM_uM              | 0/1/0/0/0/1/0/1     |
| chr5 | 58458527 | 58458527 | G | A | PLK2     | exonic | nonsynonymous SNV | PLK2:NM_006622:exon4:c.C497T:p.S166L,PLK2:NM_00125 226:exon5:c.C455T:p.S152L                                                                                                                                                                                                                               | 2.757 | .        | .        | .        | Fam28_f_m_aF_uF              | 0/0/0/1/0/1/0/1     |
| chr5 | 62381242 | 62381242 | C | G | KIF2A    | exonic | nonsynonymous SNV | KIF2A:NM_001243953:exon19:c.C1967G:p.T656S,KIF2A:N M_004520:exon19:c.C2024G:p.T675S,KIF2A:NM_00109851 1:exon20:c.C2138G:p.T713S,KIF2A:NM_001243952:exon20 :c.C1964G:p.T655S                                                                                                                                | 1.097 | .        | 7.46E-05 | 2.09E-05 | Fam12_f_m_aM_uM_aM           | 0/0/0/1/0/1/0/1/0/1 |
| chr5 | 65224380 | 65224380 | T | C | ADAMTS6  | exonic | nonsynonymous SNV | ADAMTS6:NM_197941:exon18:c.A2212G:p.I738V                                                                                                                                                                                                                                                                  | 1.251 | .        | .        | .        | Fam38_f_m_aM                 | 0/1/0/0/0/1         |
| chr5 | 65664576 | 65664576 | T | G | TRAPPC13 | exonic | nonsynonymous SNV | TRAPPC13:NM_001365342:exon11:c.T733G:p.C245G,TRAP PC13:NM_001365343:exon11:c.T730G:p.C244G,TRAPPC13: NM_001093756:exon12:c.T1201G:p.C401G,TRAPPC13:NM _001243737:exon12:c.T1204G:p.C402G,TRAPPC13:NM_00 1093755:exon13:c.T1222G:p.C408G,TRAPPC13:NM_02494 1:exon13:c.T1219G:p.C407G                        | 1.085 | .        | 3.36E-05 | 2.09E-05 | Fam6_f_m_aM                  | 0/1/0/0/0/1         |
| chr5 | 66159305 | 66159305 | C | T | SREK1    | exonic | nonsynonymous SNV | SREK1:NM_001077199:exon3:c.C382T:p.P128S,SREK1:NM_ 001323529:exon3:c.C382T:p.P128S,SREK1:NM_001323533: exon3:c.C382T:p.P128S,SREK1:NM_001270492:exon4:c.C3 4T:p.P12S,SREK1:NM_001323527:exon4:c.C34T:p.P12S,SRE K1:NM_139168:exon4:c.C34T:p.P12S                                                           | 2.377 | .        | .        | .        | Fam118_f_m_aM_aF_uM          | 0/0/0/1/0/0/0/1/0/1 |
| chr5 | 69100868 | 69100868 | G | C | SLC30A5  | exonic | nonsynonymous SNV | SLC30A5:NM_022902:exon2:c.G145C:p.E49Q,SLC30A5:NM _024055:exon2:c.G145C:p.E49Q                                                                                                                                                                                                                             | 1.152 | .        | 2.24E-05 | 1.41E-05 | Fam91_m_aM_dM_aM_dM          | 0/1/0/1/0/1/0/1/0/0 |
| chr5 | 76955726 | 76955726 | G | A | CRHBP    | exonic | nonsynonymous SNV | CRHBP:NM_001882:exon4:c.G407A:p.R136Q                                                                                                                                                                                                                                                                      | 1.587 | .        | 3.35E-05 | 6.98E-06 | Fam45_f_m_aM_uF              | 0/1/0/0/0/1/0/1     |
| chr5 | 78510179 | 78510179 | A | G | LHFP2    | exonic | nonsynonymous SNV | LHFP2:NM_005779:exon4:c.T35C:p.L12P                                                                                                                                                                                                                                                                        | 1.665 | .        | .        | .        | Fam120_f_m_aM_aM             | 0/0/0/1/0/1/0/0     |
| chr5 | 81446921 | 81446921 | C | T | SSBP2    | exonic | nonsynonymous SNV | SSBP2:NM_001256733:exon11:c.G665A:p.G222D,SSBP2:N M_001256734:exon11:c.G659A:p.G220D,SSBP2:NM_0012 56735:exon11:c.G635A:p.G212D,SSBP2:NM_001256736:ex on11:c.G635A:p.G212D,SSBP2:NM_001256732:exon12:c.G 749A:p.G250D,SSBP2:NM_001345886:exon12:c.G749A:p.G 250D,SSBP2:NM_012446:exon12:c.G725A:p.G242D    | 2.212 | .        | .        | .        | Fam34_f_m_aM_uF              | 0/1/0/0/0/1/0/0     |
| chr5 | 95736954 | 95736954 | C | G | RHOBTB3  | exonic | nonsynonymous SNV | RHOBTB3:NM_014899:exon3:c.C294G:p.I98M                                                                                                                                                                                                                                                                     | 1.24  | .        | .        | .        | Fam101_f_m_aM                | 0/1/0/0/0/1         |

|      |           |           |   |   |          |        |                   |                                                                                                                                                                                                                                                                                                                                                                                                                                                                                                                                                                                                                                                                                                                                                                                                                                                                                                                                                                                                                                                                                                                                                                                                                                                                                                                                                                                                                                                                                                                                                                                                                                                                          |           |          |            |                               |                     |
|------|-----------|-----------|---|---|----------|--------|-------------------|--------------------------------------------------------------------------------------------------------------------------------------------------------------------------------------------------------------------------------------------------------------------------------------------------------------------------------------------------------------------------------------------------------------------------------------------------------------------------------------------------------------------------------------------------------------------------------------------------------------------------------------------------------------------------------------------------------------------------------------------------------------------------------------------------------------------------------------------------------------------------------------------------------------------------------------------------------------------------------------------------------------------------------------------------------------------------------------------------------------------------------------------------------------------------------------------------------------------------------------------------------------------------------------------------------------------------------------------------------------------------------------------------------------------------------------------------------------------------------------------------------------------------------------------------------------------------------------------------------------------------------------------------------------------------|-----------|----------|------------|-------------------------------|---------------------|
| chr5 | 100562140 | 100562140 | A | T | FAM174A  | exonic | nonsynonymous SNV | FAM174A:NM_198507:exon2:c.A521T:p.D174V                                                                                                                                                                                                                                                                                                                                                                                                                                                                                                                                                                                                                                                                                                                                                                                                                                                                                                                                                                                                                                                                                                                                                                                                                                                                                                                                                                                                                                                                                                                                                                                                                                  | . 1.779 . | .        | .          | Fam39_f_m_aM                  | 0/0;0/1;0/1         |
| chr5 | 114404745 | 114404745 | A | G | KCNN2    | exonic | nonsynonymous SNV | KCNN2:NM_021614:exon3:c.A1526G:p.N509S                                                                                                                                                                                                                                                                                                                                                                                                                                                                                                                                                                                                                                                                                                                                                                                                                                                                                                                                                                                                                                                                                                                                                                                                                                                                                                                                                                                                                                                                                                                                                                                                                                   | . 2.068 . | .        | .          | Fam56_f_m_aF_aM               | 0/0;0/1;0/1;0/0     |
| chr5 | 129461444 | 129461444 | C | T | ADAMTS19 | exonic | nonsynonymous SNV | ADAMTS19:NM_133638:exon2:c.C434T:p.S145L                                                                                                                                                                                                                                                                                                                                                                                                                                                                                                                                                                                                                                                                                                                                                                                                                                                                                                                                                                                                                                                                                                                                                                                                                                                                                                                                                                                                                                                                                                                                                                                                                                 | . 2.142 . | 7.38E-05 | 0.0004     | 6.29E-05 Fam117_f_m_aM_aF     | 0/1;0/0;0/1;0/1     |
| chr5 | 131672678 | 131672678 | T | C | FNIP1    | exonic | nonsynonymous SNV | FNIP1:NM_001008738:exon13:c.A1682G:p.H561R, FNIP1:NM_001346114:exon13:c.A1631G:p.H544R, FNIP1:NM_133372:exon14:c.A1766G:p.H589R                                                                                                                                                                                                                                                                                                                                                                                                                                                                                                                                                                                                                                                                                                                                                                                                                                                                                                                                                                                                                                                                                                                                                                                                                                                                                                                                                                                                                                                                                                                                          | . 1.404 . | .        | 0.0001     | 4.19E-05 Fam24_f_m_aM_aM      | 0/1;0/0;0/0;0/1     |
| chr5 | 131796838 | 131796838 | G | C | FNIP1    | exonic | nonsynonymous SNV | FNIP1:NM_001008738:exon1:c.C84G:p.C28W, FNIP1:NM_001346113:exon1:c.C84G:p.C28W, FNIP1:NM_001346114:exon1:c.C84G:p.C28W, FNIP1:NM_133372:exon1:c.C84G:p.C28W                                                                                                                                                                                                                                                                                                                                                                                                                                                                                                                                                                                                                                                                                                                                                                                                                                                                                                                                                                                                                                                                                                                                                                                                                                                                                                                                                                                                                                                                                                              | . 1.351 . | .        | 1.45E-05 . | Fam67_f_m_aM_uF               | 0/1;0/0;0/1;0/0     |
| chr5 | 131989436 | 131989436 | T | A | ACSL6    | exonic | nonsynonymous SNV | ACSL6:NM_001009185:exon5:c.A523T:p.I175F, ACSL6:NM_001205247:exon5:c.A418T:p.I140F, ACSL6:NM_001205248:exon5:c.A448T:p.I150F, ACSL6:NM_001205250:exon5:c.A481T:p.I161F, ACSL6:NM_001205251:exon5:c.A343T:p.I115F, ACSL6:NM_015256:exon5:c.A523T:p.I175F                                                                                                                                                                                                                                                                                                                                                                                                                                                                                                                                                                                                                                                                                                                                                                                                                                                                                                                                                                                                                                                                                                                                                                                                                                                                                                                                                                                                                  | . 1.221 . | .        | 0.0005     | 2.80E-05 Fam113_f_m_aF_raM_uF | 0/1;0/0;0/1;0/0;0/0 |
| chr5 | 132073876 | 132073876 | C | T | CSF2     | exonic | nonsynonymous SNV | CSF2:NM_000758:exon1:c.C53T:p.A18V                                                                                                                                                                                                                                                                                                                                                                                                                                                                                                                                                                                                                                                                                                                                                                                                                                                                                                                                                                                                                                                                                                                                                                                                                                                                                                                                                                                                                                                                                                                                                                                                                                       | . 1.051 . | .        | 3.39E-05 . | Fam114_f_m_aM                 | 0/1;0/0;0/1         |
| chr5 | 132747856 | 132747856 | C | G | CCNI2    | exonic | nonsynonymous SNV | CCNI2:NM_001039780:exon1:c.C361G:p.R121G, CCNI2:NM_001287252:exon1:c.C361G:p.R121G, CCNI2:NM_001287253:exon1:c.C361G:p.R121G                                                                                                                                                                                                                                                                                                                                                                                                                                                                                                                                                                                                                                                                                                                                                                                                                                                                                                                                                                                                                                                                                                                                                                                                                                                                                                                                                                                                                                                                                                                                             | . 2.479 . | .        | .          | Fam25_f_m_aM                  | 0/1;0/0;0/1         |
| chr5 | 138886218 | 138886218 | C | T | CTNNA1   | exonic | nonsynonymous SNV | CTNNA1:NM_001290309:exon7:c.C760T:p.R254C, CTNNA1:NM_001290307:exon8:c.C1069T:p.R357C, CTNNA1:NM_001290310:exon8:c.C700T:p.R234C, CTNNA1:NM_001323983:exon8:c.C1069T:p.R357C, CTNNA1:NM_001323985:exon8:c.C1069T:p.R357C, CTNNA1:NM_001323986:exon8:c.C1069T:p.R357C, CTNNA1:NM_001903:exon8:c.C1069T:p.R357C, CTNNA1:NM_001323982:exon9:c.C1069T:p.R357C, CTNNA1:NM_001323984:exon9:c.C1069T:p.R357C                                                                                                                                                                                                                                                                                                                                                                                                                                                                                                                                                                                                                                                                                                                                                                                                                                                                                                                                                                                                                                                                                                                                                                                                                                                                    | . 1.313 . | .        | 7.50E-05   | 6.99E-06 Fam65_f_m_aM_uF_dF   | 0/1;0/0;0/1;0/1;0/1 |
| chr5 | 138932710 | 138932710 | G | A | CTNNA1   | exonic | nonsynonymous SNV | CTNNA1:NM_001324010:exon8:c.G982A:p.G328R, CTNNA1:NM_001324012:exon9:c.G1078A:p.G360R, CTNNA1:NM_001290312:exon11:c.G1321A:p.G441R, CTNNA1:NM_001323987:exon11:c.G1321A:p.G441R, CTNNA1:NM_001323994:exon11:c.G1321A:p.G441R, CTNNA1:NM_001324002:exon11:c.G1321A:p.G441R, CTNNA1:NM_001324004:exon11:c.G1321A:p.G441R, CTNNA1:NM_001323989:exon12:c.G1321A:p.G441R, CTNNA1:NM_001323991:exon12:c.G1321A:p.G441R, CTNNA1:NM_001324000:exon12:c.G1321A:p.G441R, CTNNA1:NM_001324008:exon12:c.G982A:p.G328R, CTNNA1:NM_001324009:exon12:c.G982A:p.G328R, CTNNA1:NM_001324013:exon12:c.G1078A:p.G360R, CTNNA1:NM_001323990:exon13:c.G1321A:p.G441R, CTNNA1:NM_001324003:exon13:c.G1321A:p.G441R, CTNNA1:NM_001324011:exon13:c.G1228A:p.G410R, CTNNA1:NM_001323988:exon14:c.G1321A:p.G441R, CTNNA1:NM_001323992:exon14:c.G1321A:p.G441R, CTNNA1:NM_001323993:exon14:c.G1321A:p.G441R, CTNNA1:NM_001323995:exon14:c.G1321A:p.G441R, CTNNA1:NM_001323996:exon14:c.G1321A:p.G441R, CTNNA1:NM_001323997:exon14:c.G1321A:p.G441R, CTNNA1:NM_001323998:exon14:c.G1321A:p.G441R, CTNNA1:NM_001323999:exon14:c.G1321A:p.G441R, CTNNA1:NM_001324005:exon14:c.G1321A:p.G441R, CTNNA1:NM_001324007:exon14:c.G982A:p.G328R, CTNNA1:NM_001324006:exon15:c.G982A:p.G328R, CTNNA1:NM_001290309:exon16:c.G2122A:p.G708R, CTNNA1:NM_001323986:exon16:c.G2338A:p.G780R, CTNNA1:NM_001290307:exon17:c.G2431A:p.G811R, CTNNA1:NM_001290310:exon17:c.G2062A:p.G688R, CTNNA1:NM_001323983:exon17:c.G2431A:p.G811R, CTNNA1:NM_001323985:exon17:c.G2431A:p.G811R, CTNNA1:NM_001903:exon17:c.G2431A:p.G811R, CTNNA1:NM_001323982:exon18:c.G2431A:p.G811R, CTNNA1:NM_001323984:exon18:c.G2431A:p.G811R | . 2.3 .   | .        | 1.12E-05 . | Fam28_f_m_aF_uF               | 0/1;0/0;0/1;0/0     |
| chr5 | 139379259 | 139379259 | C | T | SLC23A1  | exonic | nonsynonymous SNV | SLC23A1:NM_005847:exon9:c.G1021A:p.A341T, SLC23A1:NM_152685:exon9:c.G1033A:p.A345T                                                                                                                                                                                                                                                                                                                                                                                                                                                                                                                                                                                                                                                                                                                                                                                                                                                                                                                                                                                                                                                                                                                                                                                                                                                                                                                                                                                                                                                                                                                                                                                       | . 1.325 . | .        | 4.47E-05   | 3.49E-05 Fam54_f_m_aM_uF      | 0/0;0/1;0/1;0/0     |
| chr5 | 139680747 | 139680747 | G | A | CXXC5    | exonic | nonsynonymous SNV | CXXC5:NM_001317200:exon2:c.G224A:p.R75H, CXXC5:NM_001317201:exon2:c.G224A:p.R75H, CXXC5:NM_001317202:exon2:c.G224A:p.R75H, CXXC5:NM_001317205:exon2:c.G224A:p.R75H, CXXC5:NM_001317207:exon2:c.G224A:p.R75H, CXXC5:NM_001317209:exon2:c.G224A:p.R75H, CXXC5:NM_016463:exon2:c.G224A:p.R75H, CXXC5:NM_001317199:exon3:c.G224A:p.R75H, CXXC5:NM_001317203:exon3:c.G224A:p.R75H, CXXC5:NM_001317204:exon3:c.G224A:p.R75H, CXXC5:NM_001317208:exon3:c.G224A:p.R75H, CXXC5:NM_001317210:exon3:c.G224A:p.R75H, CXXC5:NM_001317211:exon3:c.G224A:p.R75H, CXXC5:NM_001317206:exon4:c.G224A:p.R75H                                                                                                                                                                                                                                                                                                                                                                                                                                                                                                                                                                                                                                                                                                                                                                                                                                                                                                                                                                                                                                                                                | . 1.13 .  | 0.0006   | 7.70E-05   | 1.40E-05 Fam63_f_m_aF         | 0/0;0/1;0/1         |
| chr5 | 139814307 | 139814307 | G | A | PSD2     | exonic | nonsynonymous SNV | PSD2:NM_032289:exon4:c.G959A:p.R320H                                                                                                                                                                                                                                                                                                                                                                                                                                                                                                                                                                                                                                                                                                                                                                                                                                                                                                                                                                                                                                                                                                                                                                                                                                                                                                                                                                                                                                                                                                                                                                                                                                     | . 1.544 . | 7.35E-05 | 0.0002     | 4.19E-05 Fam20_f_m_aM_uF      | 0/1;0/0;0/1;0/0     |

|      |           |           |   |   |               |        |                     |                                                                                                                                                                                                                                                                                                                                                                                                                                                                                                                                                                                                                                                                                                                                                                                                                                                                                                                                                                                                                           |       |          |          |                        |                         |
|------|-----------|-----------|---|---|---------------|--------|---------------------|---------------------------------------------------------------------------------------------------------------------------------------------------------------------------------------------------------------------------------------------------------------------------------------------------------------------------------------------------------------------------------------------------------------------------------------------------------------------------------------------------------------------------------------------------------------------------------------------------------------------------------------------------------------------------------------------------------------------------------------------------------------------------------------------------------------------------------------------------------------------------------------------------------------------------------------------------------------------------------------------------------------------------|-------|----------|----------|------------------------|-------------------------|
| chr5 | 139814348 | 139814348 | C | T | PSD2          | exonic | nonsynonymous SNV   | PSD2:NM_032289:exon4:c.C1000T:p.R334W                                                                                                                                                                                                                                                                                                                                                                                                                                                                                                                                                                                                                                                                                                                                                                                                                                                                                                                                                                                     | 1.404 | 0.0002   | 2.09E-05 | Fam21_f_m_aM_uM        | 0/1;0/0;0/1;0/1         |
| chr5 | 139871826 | 139871826 | G | A | NRG2          | exonic | nonsynonymous SNV   | NRG2:NM_004883:exon4:c.C1007T:p.S336L;NRG2:NM_013981:exon4:c.C1007T:p.S336L;NRG2:NM_013982:exon4:c.C1007T:p.S336L;NRG2:NM_013983:exon4:c.C1007T:p.S336L                                                                                                                                                                                                                                                                                                                                                                                                                                                                                                                                                                                                                                                                                                                                                                                                                                                                   | 1.538 | 7.34E-05 | 2.09E-05 | Fam77_f_m_aM_aF_uM_uFs | 0/0;0/1;0/1;0/0;0/1;0/0 |
| chr5 | 140335956 | 140335956 | T | C | HBEGF         | exonic | nonsynonymous SNV   | HBEGF:NM_001945:exon4:c.A470G:p.Y157C                                                                                                                                                                                                                                                                                                                                                                                                                                                                                                                                                                                                                                                                                                                                                                                                                                                                                                                                                                                     | 2.185 |          |          | Fam61_f_m_aM           | 0/0;0/1;0/1             |
| chr5 | 140529737 | 140529737 | A | G | ANKHD1;ANKHD1 | exonic | nonsynonymous SNV   | ANKHD1:NM_017747:exon29:c.A6791G;p.D2264G;ANKHD1-EIF4EBP3:NM_020690:exon29:c.A6791G;p.D2264G                                                                                                                                                                                                                                                                                                                                                                                                                                                                                                                                                                                                                                                                                                                                                                                                                                                                                                                              | 1.103 |          | 4.58E-05 | Fam103_f_m_aM          | 0/0;0/1;0/1             |
| chr5 | 140562100 | 140562100 | C | T | APBB3         | exonic | nonsynonymous SNV   | APBB3:NM_006051:exon6:c.G626A;p.R209H;APBB3:NM_133172:exon6:c.G626A;p.R209H;APBB3:NM_133173:exon6:c.G626A;p.R209H;APBB3:NM_133174:exon6:c.G626A;p.R209Q                                                                                                                                                                                                                                                                                                                                                                                                                                                                                                                                                                                                                                                                                                                                                                                                                                                                   | 1.015 |          | 6.71E-05 | Fam43_f_m_aM           | 0/1;0/0;0/1             |
| chr5 | 140659793 | 140659793 | T | G | IK            | exonic | nonsynonymous SNV   | IK:NM_006083:exon14:c.T1233G;p.N411K                                                                                                                                                                                                                                                                                                                                                                                                                                                                                                                                                                                                                                                                                                                                                                                                                                                                                                                                                                                      | 1.254 |          |          | Fam122_f_m_aM          | 0/0;0/1;0/1             |
| chr5 | 140674744 | 140674744 | T | G | HARS          | exonic | nonsynonymous SNV   | HARS:NM_001289093:exon9:c.A1051C;p.I351L;HARS:NM_001289092:exon10:c.A1171C;p.I391L;HARS:NM_001258040:exon11:c.A1273C;p.I425L;HARS:NM_001258042:exon11:c.A1213C;p.I405L;HARS:NM_001258041:exon12:c.A1333C;p.I445L;HARS:NM_001289094:exon12:c.A1306C;p.I436L;HARS:NM_002109:exon12:c.A1393C;p.I465L                                                                                                                                                                                                                                                                                                                                                                                                                                                                                                                                                                                                                                                                                                                         | 1.111 |          | 2.23E-05 | Fam113_f_m_aF_raM_uF   | 0/0;0/0;0/0;0/1;0/0     |
| chr5 | 140786721 | 140786721 | A | C | PCDHA1        | exonic | nonsynonymous SNV   | PCDHA1:NM_018900:exon1:c.A431C;p.E144A;PCDHA1:NM_031410:exon1:c.A431C;p.E144A;PCDHA1:NM_031411:exon1:c.A431C;p.E144A                                                                                                                                                                                                                                                                                                                                                                                                                                                                                                                                                                                                                                                                                                                                                                                                                                                                                                      | 1.037 | 7.34E-05 | 0.0002   | Fam103_f_m_aM          | 0/0;0/1;0/1             |
| chr5 | 141051843 | 141051843 | G | T | PCDHB1        | exonic | nonsynonymous SNV   | PCDHB1:NM_013340:exon1:c.G373T;p.D125Y                                                                                                                                                                                                                                                                                                                                                                                                                                                                                                                                                                                                                                                                                                                                                                                                                                                                                                                                                                                    | 1.315 | 0.0004   | 0.0003   | Fam120_f_m_aM_aM       | 0/0;0/1;0/1;0/0         |
| chr5 | 141340204 | 141340204 | C | A | PCDHGA2       | exonic | nonsynonymous SNV   | PCDHGA2:NM_018915:exon1:c.C1233A;p.D411E;NM_032009:exon1:c.C1233A;p.D411E                                                                                                                                                                                                                                                                                                                                                                                                                                                                                                                                                                                                                                                                                                                                                                                                                                                                                                                                                 | 1.012 |          | 3.35E-05 | Fam7_f_m_aM_aM_uM      | 0/1;0/0;0/1;0/1;0/0     |
| chr5 | 141340331 | 141340331 | C | T | PCDHGA2       | exonic | nonsynonymous SNV   | PCDHGA2:NM_018915:exon1:c.C1360T;p.R454C;PCDHGA2:NM_032009:exon1:c.C1360T;p.R454C                                                                                                                                                                                                                                                                                                                                                                                                                                                                                                                                                                                                                                                                                                                                                                                                                                                                                                                                         | 1.125 | 0.0003   | 0.0005   | Fam108_f_m_aM          | 0/0;0/1;0/1             |
| chr5 | 141340436 | 141340436 | T | C | PCDHGA2       | exonic | nonsynonymous SNV   | PCDHGA2:NM_018915:exon1:c.T1465C;p.Y489H;PCDHGA2:NM_032009:exon1:c.T1465C;p.Y489H                                                                                                                                                                                                                                                                                                                                                                                                                                                                                                                                                                                                                                                                                                                                                                                                                                                                                                                                         | 1.2   |          | 0.0002   | Fam110_f_m_aM_aM_uMs   | 0/1;0/0;0/1;0/0;0/1     |
| chr5 | 141344704 | 141344704 | G | A | PCDHGA3       | exonic | nonsynonymous SNV   | PCDHGA3:NM_018916:exon1:c.G671A;p.G224D;PCDHGA3:NM_032011:exon1:c.G671A;p.G224D                                                                                                                                                                                                                                                                                                                                                                                                                                                                                                                                                                                                                                                                                                                                                                                                                                                                                                                                           | 1.409 |          | 2.25E-05 | Fam90_f_m_aF_dM        | 0/0;0/1;0/1;0/0         |
| chr5 | 141351151 | 141351151 | C | G | PCDHGB1       | exonic | nonsynonymous SNV   | PCDHGB1:NM_018922:exon1:c.C891G;p.I297M;PCDHGB1:NM_032095:exon1:c.C891G;p.I297M                                                                                                                                                                                                                                                                                                                                                                                                                                                                                                                                                                                                                                                                                                                                                                                                                                                                                                                                           | 1.17  |          |          | Fam20_f_m_aM_uF        | 0/0;0/1;0/1;0/1         |
| chr5 | 141352121 | 141352121 | G | A | PCDHGB1       | exonic | nonsynonymous SNV   | PCDHGB1:NM_018922:exon1:c.G1861A;p.E621K;PCDHGB1:NM_032095:exon1:c.G1861A;p.E621K                                                                                                                                                                                                                                                                                                                                                                                                                                                                                                                                                                                                                                                                                                                                                                                                                                                                                                                                         | 1.245 |          |          | Fam43_f_m_aM           | 0/1;0/0;0/1             |
| chr5 | 141375414 | 141375414 | A | G | PCDHGA6       | exonic | nonsynonymous SNV   | PCDHGA6:NM_018919:exon1:c.A1331G;p.D444G;PCDHGA6:NM_032086:exon1:c.A1331G;p.D444G                                                                                                                                                                                                                                                                                                                                                                                                                                                                                                                                                                                                                                                                                                                                                                                                                                                                                                                                         | 1.123 |          | 0.0002   | Fam116_f_m_aM_aF       | 0/0;0/1;0/0;0/1         |
| chr5 | 141408488 | 141408488 | T | G | PCDHGB6       | exonic | nonsynonymous SNV   | PCDHGB6:NM_018926:exon1:c.T286G;p.C96G;PCDHGB6:NM_032100:exon1:c.T286G;p.C96G                                                                                                                                                                                                                                                                                                                                                                                                                                                                                                                                                                                                                                                                                                                                                                                                                                                                                                                                             | 1.391 | 0.0003   | 6.57E-05 | Fam92_f_m_aM_raM       | 0/0;0/1;0/1;0/0         |
| chr5 | 141420006 | 141420006 | G | A | PCDHGB7       | exonic | nonsynonymous SNV   | PCDHGB7:NM_018927:exon1:c.G2147A;p.R716Q;PCDHGB7:NM_032101:exon1:c.G2147A;p.R716Q                                                                                                                                                                                                                                                                                                                                                                                                                                                                                                                                                                                                                                                                                                                                                                                                                                                                                                                                         | 1.089 |          |          | Fam24_f_m_aM_aM        | 0/0;0/1;0/0;0/1         |
| chr5 | 141423002 | 141423002 | T | C | PCDHGA11      | exonic | nonsynonymous SNV   | PCDHGA11:NM_018914:exon1:c.T1775C;p.V592A;PCDHGA11:NM_032091:exon1:c.T1775C;p.V592A;PCDHGA11:NM_032092:exon1:c.T1775C;p.V592A                                                                                                                                                                                                                                                                                                                                                                                                                                                                                                                                                                                                                                                                                                                                                                                                                                                                                             | 1.317 |          |          | Fam97_f_m_aM_aF        | 0/0;0/1;0/1;0/1         |
| chr5 | 141476387 | 141476387 | C | G | PCDHGC3       | exonic | nonsynonymous SNV   | PCDHGC3:NM_002588:exon1:c.C271G;p.R91G;PCDHGC3:NM_032402:exon1:c.C271G;p.R91G                                                                                                                                                                                                                                                                                                                                                                                                                                                                                                                                                                                                                                                                                                                                                                                                                                                                                                                                             | 1.71  | 0.0004   | 0.0006   | Fam32_f_m_aM_uM        | 0/0;0/1;0/1;0/1         |
| chr5 | 141478175 | 141478175 | A | - | PCDHGC3       | exonic | frameshift deletion | PCDHGC3:NM_002588:exon1:c.2059delA;p.N689ifs*10;PCDHGC3:NM_032402:exon1:c.2059delA;p.N689ifs*10                                                                                                                                                                                                                                                                                                                                                                                                                                                                                                                                                                                                                                                                                                                                                                                                                                                                                                                           | 0.577 |          | 0.0006   | Fam24_f_m_aM_aM        | 0/1;0/0;0/0;0/1         |
| chr5 | 141486792 | 141486792 | G | A | PCDHGC4       | exonic | nonsynonymous SNV   | PCDHGC4:NM_018928:exon1:c.G1619A;p.R540Q;PCDHGC4:NM_032406:exon1:c.G1619A;p.R540Q                                                                                                                                                                                                                                                                                                                                                                                                                                                                                                                                                                                                                                                                                                                                                                                                                                                                                                                                         | 1.131 |          | 4.47E-05 | Fam49_f_m_aM           | 0/0;0/1;0/1             |
| chr5 | 141490787 | 141490787 | T | A | PCDHGC5       | exonic | nonsynonymous SNV   | PCDHGC5:NM_018929:exon1:c.T1547A;p.I516N;PCDHGC5:NM_032407:exon1:c.T1547A;p.I516N                                                                                                                                                                                                                                                                                                                                                                                                                                                                                                                                                                                                                                                                                                                                                                                                                                                                                                                                         | 1.12  |          |          | Fam72_f_m_aF_uF        | 0/0;0/1;0/1;0/1         |
| chr5 | 141505413 | 141505413 | C | T | PCDHGA1;PCDHG | exonic | nonsynonymous SNV   | PCDHGC3:NM_002588:exon3:c.C2510T;p.T837I;PCDHGA12:NM_003735:exon3:c.C2504T;p.T835I;PCDHGB4:NM_003736:exon3:c.C2477T;p.T826I;PCDHGA1:NM_018912:exon3:c.C2501T;p.T834I;PCDHGA10:NM_018913:exon3:c.C2516T;p.T839I;PCDHGA11:NM_018914:exon3:c.C2513T;p.T838I;PCDHGA2:NM_018915:exon3:c.C2504T;p.T835I;PCDHGA3:NM_018916:exon3:c.C2504T;p.T835I;PCDHGA4:NM_018917:exon3:c.C2594T;p.T865I;PCDHGA5:NM_018918:exon3:c.C2501T;p.T834I;PCDHGA6:NM_018919:exon3:c.C2504T;p.T835I;PCDHGA7:NM_018920:exon3:c.C2504T;p.T835I;PCDHGA9:NM_018921:exon3:c.C2504T;p.T835I;PCDHGB1:NM_018922:exon3:c.C2489T;p.T830I;PCDHGB2:NM_018923:exon3:c.C2501T;p.T834I;PCDHGB3:NM_018924:exon3:c.C2495T;p.T832I;PCDHGB5:NM_018925:exon3:c.C2477T;p.T826I;PCDHGB6:NM_018926:exon3:c.C2498T;p.T833I;PCDHGB7:NM_018927:exon3:c.C2495T;p.T832I;PCDHGC4:NM_018928:exon3:c.C2522T;p.T841I;PCDHGC5:NM_018929:exon3:c.C2540T;p.T847I;PCDHGA8:NM_032088:exon3:c.C2504T;p.T835I;PCDHGA11:NM_032092:exon3:c.C1958T;p.T653I;PCDHGC3:NM_032403:exon3:c.C110T;p.T37I | 1.348 |          | 1.14E-05 | Fam119_f_m_aM_aM       | 0/0;0/1;0/1;0/1         |
| chr5 | 141659912 | 141659912 | G | A | ARAP3         | exonic | nonsynonymous SNV   | ARAP3:NM_022481:exon22:c.C3134T;p.A1045V                                                                                                                                                                                                                                                                                                                                                                                                                                                                                                                                                                                                                                                                                                                                                                                                                                                                                                                                                                                  | 1.054 | 0.0005   | 0.0002   | Fam115_f_m_aF_aM_aF    | 0/0;0/1;0/1;0/0;0/0     |
| chr5 | 141673783 | 141673783 | G | A | ARAP3         | exonic | nonsynonymous SNV   | ARAP3:NM_022481:exon5:c.C724T;p.R242W                                                                                                                                                                                                                                                                                                                                                                                                                                                                                                                                                                                                                                                                                                                                                                                                                                                                                                                                                                                     | 1.008 |          | 1.12E-05 | Fam101_f_m_aM          | 0/0;0/1;0/1             |

|      |           |           |   |   |         |        |                      |                                                                                                                                                                                                                                                                                                                                                                                                                                          |       |        |          |          |                     |                     |                     |
|------|-----------|-----------|---|---|---------|--------|----------------------|------------------------------------------------------------------------------------------------------------------------------------------------------------------------------------------------------------------------------------------------------------------------------------------------------------------------------------------------------------------------------------------------------------------------------------------|-------|--------|----------|----------|---------------------|---------------------|---------------------|
| chr5 | 142314589 | 142314589 | G | A | SPRY4   | exonic | nonsynonymous SNV    | SPRY4:NM_001127496:exon2:c.C520T:p.R174W,SPRY4:NM_001293290:exon2:c.C520T:p.R174W,SPRY4:NM_001293289:exon3:c.C520T:p.R174W,SPRY4:NM_030964:exon3:c.C589T:p.R197W                                                                                                                                                                                                                                                                         | 1.099 | 0.0003 | 9.83E-05 | 5.58E-05 | Fam119_f_m_aM_aM    | 0/1;0/0;0/1;0/0     |                     |
| chr5 | 146340372 | 146340372 | G | C | POU4F3  | exonic | nonsynonymous SNV    | POU4F3:NM_002700:exon2:c.G945C:p.K315N                                                                                                                                                                                                                                                                                                                                                                                                   | 1.416 | 0.0006 | 0.0002   | 6.98E-06 | Fam5_f_m_aM         | 0/0;0/1;0/1         |                     |
| chr5 | 147401570 | 147401570 | G | C | DPYSL3  | exonic | nonsynonymous SNV    | DPYSL3:NM_001197294:exon9:c.C1280G:p.T427S,DPYSL3:NM_001387:exon9:c.C983G:p.T313S                                                                                                                                                                                                                                                                                                                                                        | 1.273 | .      | .        | .        | Fam119_f_m_aM_aM    | 0/1;0/0;0/1;0/1     |                     |
| chr5 | 150528020 | 150528020 | C | T | NDST1   | exonic | nonsynonymous SNV    | NDST1:NM_001301063:exon3:c.C730T:p.R244C,NDST1:NM_001543:exon3:c.C730T:p.R244C                                                                                                                                                                                                                                                                                                                                                           | 1.786 | .      | 0.0002   | 3.49E-05 | Fam108_f_m_aM       | 0/1;0/0;0/1         |                     |
| chr5 | 150535808 | 150535808 | C | T | NDST1   | exonic | nonsynonymous SNV    | NDST1:NM_001301063:exon6:c.C1360T:p.R454C,NDST1:NM_001543:exon6:c.C1360T:p.R454C                                                                                                                                                                                                                                                                                                                                                         | 1.713 | .      | 0.0002   | 0.0003   | 0.0001              | Fam23_f_m_aM_dF_uFs | 0/0;0/1;0/1;0/1;0/0 |
| chr5 | 150549774 | 150549774 | C | A | NDST1   | exonic | nonsynonymous SNV    | NDST1:NM_001301063:exon12:c.C2242A:p.H748N,NDST1:NM_001543:exon13:c.C2413A:p.H805N                                                                                                                                                                                                                                                                                                                                                       | 1.178 | .      | .        | .        | Fam96_f_m_aM_uF     | 0/0;0/1;0/1;0/1     |                     |
| chr5 | 150648441 | 150648441 | - | C | SYNPO   | exonic | frameshift insertion | SYNPO:NM_001109974:exon2:c.167dupC:p.P58Tfs*4,SYNPO:NM_007286:exon2:c.167dupC:p.P58Tfs*4,SYNPO:NM_001166208:exon3:c.899dupC:p.P302Tfs*4,SYNPO:NM_001166209:exon3:c.899dupC:p.P302Tfs*4                                                                                                                                                                                                                                                   | 0.579 | .      | .        | .        | Fam65_f_m_aM_uF_dF  | 0/0;0/1;0/1;0/1;0/1 |                     |
| chr5 | 150696670 | 150696670 | C | A | RBM22   | exonic | nonsynonymous SNV    | RBM22:NM_018047:exon6:c.G408T:p.M136I                                                                                                                                                                                                                                                                                                                                                                                                    | 1.263 | .      | .        | .        | Fam38_f_m_aM        | 0/0;0/1;0/1         |                     |
| chr5 | 151465147 | 151465147 | C | T | SLC36A1 | exonic | nonsynonymous SNV    | SLC36A1:NM_001308150:exon5:c.C397T:p.R133W,SLC36A1:NM_001308151:exon5:c.C397T:p.R133W,SLC36A1:NM_078483:exon5:c.C397T:p.R133W,SLC36A1:NM_001349740:exon6:c.C313T:p.R105W                                                                                                                                                                                                                                                                 | 1.009 | .      | 0.0003   | 0.0003   | 0.0001              | Fam45_f_m_aM_uF     | 0/0;0/1;0/1;0/1     |
| chr5 | 151666438 | 151666438 | G | T | SPARC   | exonic | nonsynonymous SNV    | SPARC:NM_001309443:exon8:c.C654A:p.D218E,SPARC:NM_001309444:exon8:c.C657A:p.D219E,SPARC:NM_003118:exon8:c.C657A:p.D219E                                                                                                                                                                                                                                                                                                                  | 1.088 | .      | 0.0004   | 0.001    | 0.0006              | Fam12_f_m_aM_uM_aM  | 0/1;0/0;0/0;0/0;0/1 |
| chr5 | 153647083 | 153647083 | C | T | GRIA1   | exonic | nonsynonymous SNV    | GRIA1:NM_000827:exon3:c.C376T:p.R126C,GRIA1:NM_00114183:exon3:c.C376T:p.R126C,GRIA1:NM_001258021:exon3:c.C406T:p.R136C,GRIA1:NM_001258022:exon3:c.C406T:p.R136C,GRIA1:NM_001258023:exon3:c.C169T:p.R57C,GRIA1:NM_001364165:exon3:c.C376T:p.R126C,GRIA1:NM_001364167:exon3:c.C169T:p.R57C,GRIA1:NM_001258020:exon4:c.C91T:p.R31C,GRIA1:NM_001364166:exon4:c.C403T:p.R135C                                                                 | 1.407 | .      | 7.34E-05 | 2.23E-05 | 2.79E-05            | Fam26_f_m_aM_uM     | 0/1;0/0;0/1;0/1     |
| chr5 | 153698985 | 153698985 | G | A | GRIA1   | exonic | nonsynonymous SNV    | GRIA1:NM_001258019:exon9:c.G1124A:p.R375H,GRIA1:NM_001364165:exon9:c.G1196A:p.R399H,GRIA1:NM_000827:exon10:c.G1364A:p.R455H,GRIA1:NM_001114183:exon10:c.G1364A:p.R455H,GRIA1:NM_001258021:exon10:c.G1394A:p.R465H,GRIA1:NM_001258022:exon10:c.G1394A:p.R465H,GRIA1:NM_001258023:exon10:c.G1157A:p.R386H,GRIA1:NM_001364167:exon10:c.G1157A:p.R386H,GRIA1:NM_001258020:exon11:c.G1079A:p.R360H,GRIA1:NM_001364166:exon11:c.G1391A:p.R464H | 2.459 | .      | 7.34E-05 | 6.17E-05 | 2.09E-05            | Fam22_f_m_aF_aF_uF  | 0/1;0/0;0/1;0/1;0/1 |
| chr5 | 154376427 | 154376427 | G | C | GALNT10 | exonic | nonsynonymous SNV    | GALNT10:NM_198321:exon5:c.G719C:p.C240S                                                                                                                                                                                                                                                                                                                                                                                                  | 1.343 | .      | .        | 1.20E-05 | 1.40E-05            | Fam34_f_m_aM_uF     | 0/0;0/1;0/1;0/0     |
| chr5 | 154416814 | 154416814 | G | A | GALNT10 | exonic | nonsynonymous SNV    | GALNT10:NM_198321:exon12:c.G1654A:p.D552N                                                                                                                                                                                                                                                                                                                                                                                                | 1.058 | .      | .        | .        | Fam91_m_aM_dM_aM_dM | 0/0;0/0;0/0;0/1;0/0 |                     |
| chr5 | 157240129 | 157240129 | G | A | ITK     | exonic | nonsynonymous SNV    | ITK:NM_005546:exon10:c.G919A:p.V307M                                                                                                                                                                                                                                                                                                                                                                                                     | 1.018 | .      | .        | .        | Fam100_f_m_aF       | 0/0;0/1;0/1         |                     |
| chr5 | 157389363 | 157389363 | C | T | CYFIP2  | exonic | nonsynonymous SNV    | CYFIP2:NM_001291721:exon28:c.C3304T:p.R1102W,CYFIP2:NM_001037333:exon29:c.C3382T:p.R1128W,CYFIP2:NM_04376:exon29:c.C3382T:p.R1128W,CYFIP2:NM_001291722:exon30:c.C3457T:p.R1153W                                                                                                                                                                                                                                                          | 1.699 | .      | 7.34E-05 | 5.63E-05 | 4.19E-05            | Fam66_f_m_aM        | 0/1;0/0;0/1         |
| chr5 | 159161528 | 159161528 | T | G | RNF145  | exonic | nonsynonymous SNV    | RNF145:NM_001199380:exon10:c.A1454C:p.N485T,RNF145:NM_001199381:exon10:c.A1415C:p.N472T,RNF145:NM_001199382:exon10:c.A1406C:p.N469T,RNF145:NM_001199383:exon10:c.A1364C:p.N455T,RNF145:NM_144726:exon10:c.A1448C:p.N483T                                                                                                                                                                                                                 | 2.528 | .      | 7.35E-05 | .        | 2.09E-05            | Fam12_f_m_aM_uM_aM  | 0/1;0/0;0/0;0/0;0/1 |
| chr5 | 160407974 | 160407974 | T | C | SLU7    | exonic | nonsynonymous SNV    | SLU7:NM_001364517:exon9:c.A959G:p.D320G,SLU7:NM_001364518:exon9:c.A914G:p.D305G,SLU7:NM_001364522:exon9:c.A944G:p.D315G,SLU7:NM_006425:exon9:c.A914G:p.D305G,SLU7:NM_001364520:exon10:c.A914G:p.D305G,SLU7:NM_001364521:exon10:c.A914G:p.D305G,SLU7:NM_001364523:exon10:c.A944G:p.D315G                                                                                                                                                  | 2     | .      | .        | .        | Fam92_f_m_aM_raM    | 0/0;0/0;0/0;0/1     |                     |
| chr5 | 163516577 | 163516577 | G | C | MAT2B   | exonic | nonsynonymous SNV    | MAT2B:NM_013283:exon5:c.G586C:p.A196P,MAT2B:NM_182796:exon5:c.G553C:p.A185P                                                                                                                                                                                                                                                                                                                                                              | 1.308 | .      | .        | 0.0004   | 0.0002              | Fam43_f_m_aM        | 0/0;0/1;0/1         |
| chr5 | 163518350 | 163518350 | C | T | MAT2B   | exonic | nonsynonymous SNV    | MAT2B:NM_013283:exon7:c.C992T:p.T331M,MAT2B:NM_182796:exon7:c.C959T:p.T320M                                                                                                                                                                                                                                                                                                                                                              | 1.164 | .      | 7.49E-05 | 4.63E-05 | 5.61E-05            | Fam122_f_m_aM       | 0/1;0/0;0/1         |
| chr5 | 168246850 | 168246850 | C | T | TENM2   | exonic | nonsynonymous SNV    | TENM2:NM_001080428:exon23:c.C5194T:p.R1732W,TENM2:NM_001368145:exon25:c.C5434T:p.R1812W,TENM2:NM_001368146:exon26:c.C5428T:p.R1810W,TENM2:NM_001122679:exon28:c.C5884T:p.R1962W                                                                                                                                                                                                                                                          | 1.267 | .      | .        | 2.25E-05 | .                   | Fam105_f_m_aM       | 0/0;0/1;0/1         |
| chr5 | 168749502 | 168749502 | C | G | SLIT3   | exonic | nonsynonymous SNV    | SLIT3:NM_001271946:exon19:c.G2107C:p.D703H,SLIT3:NM_003062:exon19:c.G2107C:p.D703H                                                                                                                                                                                                                                                                                                                                                       | 1.063 | .      | .        | .        | 6.98E-06            | Fam116_f_m_aM_aF    | 0/0;0/1;0/0;0/1     |
| chr5 | 172106725 | 172106725 | A | G | STK10   | exonic | nonsynonymous SNV    | STK10:NM_005990:exon6:c.T683C:p.I228T                                                                                                                                                                                                                                                                                                                                                                                                    | 1.176 | .      | .        | .        | Fam56_f_m_aF_aM     | 0/0;0/1;0/1;0/1     |                     |
| chr5 | 172770592 | 172770592 | G | C | DUSP1   | exonic | nonsynonymous SNV    | DUSP1:NM_004417:exon1:c.C361G:p.L121V                                                                                                                                                                                                                                                                                                                                                                                                    | 1.344 | .      | .        | .        | Fam85_f_m_aM_aM     | 0/1;0/0;0/1;0/0     |                     |
| chr5 | 173945099 | 173945099 | G | A | CPEB4   | exonic | nonsynonymous SNV    | CPEB4:NM_001308191:exon3:c.G1340A:p.R447Q,CPEB4:NM_001308193:exon3:c.G194A:p.R65Q,CPEB4:NM_001308189:exon4:c.G1364A:p.R455Q,CPEB4:NM_001308192:exon4:c.G245A:p.R82Q,CPEB4:NM_030627:exon5:c.G1415A:p.R472Q                                                                                                                                                                                                                               | 2.832 | .      | .        | 7.45E-05 | .                   | Fam57_f_m_aM_uF     | 0/0;0/1;0/1;0/1     |
| chr5 | 176368827 | 176368827 | C | A | ARL10   | exonic | nonsynonymous SNV    | ARL10:NM_001317948:exon3:c.C406A:p.R136S,ARL10:NM_173664:exon3:c.C406A:p.R136S                                                                                                                                                                                                                                                                                                                                                           | 1.423 | .      | .        | 9.01E-05 | 1.40E-05            | Fam103_f_m_aM       | 0/1;0/0;0/1         |

|      |           |           |    |   |         |        |                      |                                                                                                                                                                                                                                                                                                                                                                                                                                                                                                                                                                                                                                                                                                                                                                                                                                                                                                                                                                                                                                                                                                                                                                                                                                                                                                                                                                                                                                                                                                                                                      |       |       |   |          |                      |                     |                 |                 |
|------|-----------|-----------|----|---|---------|--------|----------------------|------------------------------------------------------------------------------------------------------------------------------------------------------------------------------------------------------------------------------------------------------------------------------------------------------------------------------------------------------------------------------------------------------------------------------------------------------------------------------------------------------------------------------------------------------------------------------------------------------------------------------------------------------------------------------------------------------------------------------------------------------------------------------------------------------------------------------------------------------------------------------------------------------------------------------------------------------------------------------------------------------------------------------------------------------------------------------------------------------------------------------------------------------------------------------------------------------------------------------------------------------------------------------------------------------------------------------------------------------------------------------------------------------------------------------------------------------------------------------------------------------------------------------------------------------|-------|-------|---|----------|----------------------|---------------------|-----------------|-----------------|
| chr5 | 177295172 | 177295173 | TC | - | NSD1    | exonic | frameshift deletion  | NSD1:NM_022455:exon23:c.7804_7805del:p.L2603Rfs*10,<br>NSD1:NM_001365684:exon24:c.6997_6998del:p.L2334Rfs*10,<br>NSD1:NM_172349:exon24:c.6997_6998del:p.L2334Rfs*10                                                                                                                                                                                                                                                                                                                                                                                                                                                                                                                                                                                                                                                                                                                                                                                                                                                                                                                                                                                                                                                                                                                                                                                                                                                                                                                                                                                  | 0.101 | .     | . | .        | Fam5_f_m_aM          | 0/1;0/0;0/1         |                 |                 |
| chr5 | 177351257 | 177351257 | G  | T | LMAN2   | exonic | nonsynonymous SNV    | LMAN2:NM_006816:exon2:c.C231A;p.F77L                                                                                                                                                                                                                                                                                                                                                                                                                                                                                                                                                                                                                                                                                                                                                                                                                                                                                                                                                                                                                                                                                                                                                                                                                                                                                                                                                                                                                                                                                                                 | .     | 1.176 | . | .        | Fam110_f_m_aM_aM_uMs | 0/1;0/0;0/0;0/1;0/0 |                 |                 |
| chr5 | 177400351 | 177400351 | C  | G | PFN3    | exonic | nonsynonymous SNV    | PFN3:NM_001029886:exon1:c.G226C;p.D76H                                                                                                                                                                                                                                                                                                                                                                                                                                                                                                                                                                                                                                                                                                                                                                                                                                                                                                                                                                                                                                                                                                                                                                                                                                                                                                                                                                                                                                                                                                               | .     | 1.774 | . | 0.0006   | 6.98E-06             | Fam87_f_m_aM_uM     | 0/1;0/0;0/1;0/1 |                 |
| chr5 | 177434915 | 177434915 | G  | A | GRK6    | exonic | nonsynonymous SNV    | GRK6:NM_001364164:exon9:c.G313A;p.E105K,GRK6:NM_001004105:exon10:c.G943A;p.E315K,GRK6:NM_001004106:exon10:c.G943A;p.E315K,GRK6:NM_002082:exon10:c.G943A;p.E315K                                                                                                                                                                                                                                                                                                                                                                                                                                                                                                                                                                                                                                                                                                                                                                                                                                                                                                                                                                                                                                                                                                                                                                                                                                                                                                                                                                                      | .     | 1.857 | . | .        | Fam103_f_m_aM        | 0/1;0/0;0/1         |                 |                 |
| chr5 | 177436406 | 177436406 | A  | T | GRK6    | exonic | nonsynonymous SNV    | GRK6:NM_001364164:exon12:c.A650T;p.D217V,GRK6:NM_001004105:exon13:c.A1280T;p.D427V,GRK6:NM_001004106:exon13:c.A1280T;p.D427V,GRK6:NM_002082:exon13:c.A1280T;p.D427V                                                                                                                                                                                                                                                                                                                                                                                                                                                                                                                                                                                                                                                                                                                                                                                                                                                                                                                                                                                                                                                                                                                                                                                                                                                                                                                                                                                  | .     | 1.925 | . | 6.54E-05 | Fam28_f_m_aF_uF      | 0/0;0/1;0/1;0/1     |                 |                 |
| chr5 | 179273037 | 179273037 | C  | G | ADAMTS2 | exonic | nonsynonymous SNV    | ADAMTS2:NM_014244:exon3:c.G562C;p.E188Q,ADAMTS2:NM_021599:exon3:c.G562C;p.E188Q                                                                                                                                                                                                                                                                                                                                                                                                                                                                                                                                                                                                                                                                                                                                                                                                                                                                                                                                                                                                                                                                                                                                                                                                                                                                                                                                                                                                                                                                      | .     | 1.23  | . | 7.35E-05 | 0.0002               | 0.0001              | Fam80_f_m_aM_uM | 0/1;0/0;0/1;0/0 |
| chr5 | 179619344 | 179619344 | -  | C | HNRNPH1 | exonic | frameshift insertion | HNRNPH1:NM_001364250:exon4:c.304dupG;p.E102Gfs*13,<br>HNRNPH1:NM_001257293:exon5:c.460dupG;p.E154Gfs*13,<br>HNRNPH1:NM_001363572:exon5:c.460dupG;p.E154Gfs*13,<br>HNRNPH1:NM_001364227:exon5:c.460dupG;p.E154Gfs*13,<br>HNRNPH1:NM_001364228:exon5:c.460dupG;p.E154Gfs*13,<br>HNRNPH1:NM_001364229:exon5:c.460dupG;p.E154Gfs*13,<br>HNRNPH1:NM_001364230:exon5:c.460dupG;p.E154Gfs*13,<br>HNRNPH1:NM_001364231:exon5:c.460dupG;p.E154Gfs*13,<br>HNRNPH1:NM_001364232:exon5:c.460dupG;p.E154Gfs*13,<br>HNRNPH1:NM_001364233:exon5:c.460dupG;p.E154fs,<br>HNRNPH1:NM_001364236:exon5:c.460dupG;p.E154Gfs*13,<br>HNRNPH1:NM_001364238:exon5:c.460dupG;p.E154Gfs*13,<br>HNRNPH1:NM_001364239:exon5:c.460dupG;p.E154Gfs*13,<br>HNRNPH1:NM_001364240:exon5:c.460dupG;p.E154Gfs*13,<br>HNRNPH1:NM_001364241:exon5:c.460dupG;p.E154Gfs*13,<br>HNRNPH1:NM_001364242:exon5:c.460dupG;p.E154Gfs*13,<br>HNRNPH1:NM_001364243:exon5:c.460dupG;p.E154Gfs*13,<br>HNRNPH1:NM_001364244:exon5:c.460dupG;p.E154Gfs*13,<br>HNRNPH1:NM_001364245:exon5:c.460dupG;p.E154Gfs*13,<br>HNRNPH1:NM_001364246:exon5:c.460dupG;p.E154Gfs*13,<br>HNRNPH1:NM_001364247:exon5:c.460dupG;p.E154Gfs*13,<br>HNRNPH1:NM_001364248:exon5:c.460dupG;p.E154Gfs*13,<br>HNRNPH1:NM_005520:exon5:c.460dupG;p.E154Gfs*13,<br>HNRNPH1:NM_001364226:exon6:c.460dupG;p.E154fs,<br>HNRNPH1:NM_001364233:exon6:c.460dupG;p.E154Gfs*13,<br>HNRNPH1:NM_001364234:exon6:c.460dupG;p.E154Gfs*13,<br>HNRNPH1:NM_001364237:exon6:c.460dupG;p.E154Gfs*13,<br>HNRNPH1:NM_001364225:exon7:c.460dupG;p.E154fs | 0.111 | .     | . | .        | Fam9_f_m_aM_dM_uF    | 0/1;0/0;0/1;0/1;0/1 |                 |                 |
| chr5 | 179709950 | 179709950 | C  | A | CANX    | exonic | nonsynonymous SNV    | CANX:NM_001364001:exon5:c.C282A;p.F94L,CANX:NM_001364000:exon6:c.C282A;p.F94L,CANX:NM_001024649:exon7:c.C606A;p.F202L,CANX:NM_001363994:exon7:c.C711A;p.F237L,CANX:NM_001363995:exon7:c.C606A;p.F202L,CANX:NM_001363996:exon7:c.C606A;p.F202L,CANX:NM_001363997:exon7:c.C606A;p.F202L,CANX:NM_001363998:exon7:c.C606A;p.F202L,CANX:NM_001363999:exon7:c.C606A;p.F202L,CANX:NM_001746:exon7:c.C606A;p.F202L,CANX:NM_001363993:exon8:c.C768A;p.F256L                                                                                                                                                                                                                                                                                                                                                                                                                                                                                                                                                                                                                                                                                                                                                                                                                                                                                                                                                                                                                                                                                                   | .     | 1.109 | . | .        | Fam82_f_m_aM_uF      | 0/1;0/0;0/1;0/0     |                 |                 |
| chr5 | 179720409 | 179720409 | A  | G | CANX    | exonic | nonsynonymous SNV    | CANX:NM_001364001:exon8:c.A707G;p.E236G,CANX:NM_001364000:exon9:c.A707G;p.E236G,CANX:NM_001024649:exon10:c.A1031G;p.E344G,CANX:NM_001363994:exon10:c.A1136G;p.E379G,CANX:NM_001363996:exon10:c.A1031G;p.E344G,CANX:NM_001363997:exon10:c.A1031G;p.E344G,CANX:NM_001363998:exon10:c.A1031G;p.E344G,CANX:NM_001363999:exon10:c.A1031G;p.E344G,CANX:NM_001746:exon10:c.A1031G;p.E344G,CANX:NM_001363993:exon11:c.A1136G;p.F378G                                                                                                                                                                                                                                                                                                                                                                                                                                                                                                                                                                                                                                                                                                                                                                                                                                                                                                                                                                                                                                                                                                                         | .     | 1.112 | . | .        | Fam62_f_m_aM_aM      | 0/1;0/0;0/1;0/0     |                 |                 |
| chr5 | 179799111 | 179799111 | A  | T | MGAT4B  | exonic | nonsynonymous SNV    | MGAT4B:NM_054013:exon10:c.T1205A;p.F402Y,MGAT4B:NM_014275:exon11:c.T1160A;p.F387Y                                                                                                                                                                                                                                                                                                                                                                                                                                                                                                                                                                                                                                                                                                                                                                                                                                                                                                                                                                                                                                                                                                                                                                                                                                                                                                                                                                                                                                                                    | .     | 1.357 | . | 3.35E-05 | 4.19E-05             | Fam94_f_m_aM        | 0/0;0/1;0/1     |                 |
| chr5 | 179966928 | 179966928 | A  | G | RNF130  | exonic | nonsynonymous SNV    | RNF130:NM_001280801:exon7:c.T1028C;p.L343P,RNF130:NM_018434:exon7:c.T1028C;p.L343P                                                                                                                                                                                                                                                                                                                                                                                                                                                                                                                                                                                                                                                                                                                                                                                                                                                                                                                                                                                                                                                                                                                                                                                                                                                                                                                                                                                                                                                                   | .     | 1.079 | . | .        | Fam19_f_m_aM         | 0/0;0/1;0/1         |                 |                 |
| chr5 | 180550012 | 180550012 | G  | A | CNOT6   | exonic | nonsynonymous SNV    | CNOT6:NM_001370472:exon3:c.G194A;p.R65Q,CNOT6:NM_001370473:exon3:c.G194A;p.R65Q                                                                                                                                                                                                                                                                                                                                                                                                                                                                                                                                                                                                                                                                                                                                                                                                                                                                                                                                                                                                                                                                                                                                                                                                                                                                                                                                                                                                                                                                      | .     | 1.585 | . | 6.17E-05 | 2.10E-05             | Fam109_f_m_aM       | 0/0;0/1;0/1     |                 |
| chr5 | 180630235 | 180630235 | G  | A | FLT4    | exonic | nonsynonymous SNV    | FLT4:NM_001354989:exon4:c.C503T;p.T168M,FLT4:NM_02020:exon4:c.C503T;p.T168M,FLT4:NM_182925:exon4:c.C503T;p.T168M                                                                                                                                                                                                                                                                                                                                                                                                                                                                                                                                                                                                                                                                                                                                                                                                                                                                                                                                                                                                                                                                                                                                                                                                                                                                                                                                                                                                                                     | .     | 1.62  | . | 6.54E-05 | 2.09E-05             | Fam66_f_m_aM        | 0/1;0/0;0/1     |                 |

|      |           |           |   |   |          |        |                   |                                                                                                                                                                                                                                                                                                                                                                                                                                                                                                                                                                                                                                                                                                                                                                                                                                                                                                                                                                                                   |       |          |          |                      |                     |                     |
|------|-----------|-----------|---|---|----------|--------|-------------------|---------------------------------------------------------------------------------------------------------------------------------------------------------------------------------------------------------------------------------------------------------------------------------------------------------------------------------------------------------------------------------------------------------------------------------------------------------------------------------------------------------------------------------------------------------------------------------------------------------------------------------------------------------------------------------------------------------------------------------------------------------------------------------------------------------------------------------------------------------------------------------------------------------------------------------------------------------------------------------------------------|-------|----------|----------|----------------------|---------------------|---------------------|
| chr5 | 180792670 | 180792670 | G | T | MGAT1    | exonic | nonsynonymous SNV | MGAT1:NM_001114619:exon2:c.C302A:p.P101H, MGAT1:NM_001114620:exon2:c.C302A:p.P101H, MGAT1:NM_001364382:exon2:c.C302A:p.P101H, MGAT1:NM_001364383:exon2:c.C302A:p.P101H, MGAT1:NM_001364389:exon2:c.C302A:p.P101H, MGAT1:NM_001364390:exon2:c.C302A:p.P101H, MGAT1:NM_001364392:exon2:c.C302A:p.P101H, MGAT1:NM_002406:exon2:c.C302A:p.P101H, MGAT1:NM_001114617:exon3:c.C302A:p.P101H, MGAT1:NM_001114618:exon3:c.C302A:p.P101H, MGAT1:NM_001364377:exon3:c.C302A:p.P101H, MGAT1:NM_001364379:exon3:c.C302A:p.P101H, MGAT1:NM_001364380:exon3:c.C302A:p.P101H, MGAT1:NM_001364381:exon3:c.C302A:p.P101H, MGAT1:NM_001364384:exon3:c.C302A:p.P101H, MGAT1:NM_001364386:exon3:c.C302A:p.P101H, MGAT1:NM_001364387:exon3:c.C302A:p.P101H, MGAT1:NM_001364391:exon3:c.C302A:p.P101H, MGAT1:NM_001364393:exon3:c.C302A:p.P101H, MGAT1:NM_001364394:exon3:c.C302A:p.P101H, MGAT1:NM_001364395:exon3:c.C302A:p.P101H, MGAT1:NM_001364385:exon4:c.C302A:p.P101H, MGAT1:NM_001364388:exon4:c.C302A:p.P101H | 1.571 | 1.47E-05 |          | Fam73_f_m_aF_dM      | 0/0;0/1;0/1;0/0     |                     |
| chr5 | 181195539 | 181195539 | G | T | TRIM7    | exonic | nonsynonymous SNV | TRIM7:NM_203297:exon5:c.C617A:p.A206E, TRIM7:NM_203293:exon7:c.C1163A:p.A388E, TRIM7:NM_203294:exon7:c.C539A:p.A180E, TRIM7:NM_203295:exon7:c.C539A:p.A180E, TRIM7:NM_203296:exon7:c.C539A:p.A180E                                                                                                                                                                                                                                                                                                                                                                                                                                                                                                                                                                                                                                                                                                                                                                                                | 1.771 | 6.59E-05 |          | Fam71_f_m_aF         | 0/0;0/1;0/1         |                     |
| chr6 | 3076950   | 3076950   | A | T | RIPK1    | exonic | nonsynonymous SNV | RIPK1:NM_001354930:exon2:c.A127T:p.I43F, RIPK1:NM_001354931:exon2:c.A127T:p.I43F, RIPK1:NM_003804:exon2:c.A127T:p.I43F, SLC22A23:NM_001286455:exon10:c.G901A:p.G3015, SLC22A23:NM_001286455:exon10:c.G174A:p.G5825, SLC22A23:NM_021945:exon11:c.G901A:p.G3015                                                                                                                                                                                                                                                                                                                                                                                                                                                                                                                                                                                                                                                                                                                                     | 1.002 | 7.37E-05 | 0.0005   | 0.0001               | Fam120_f_m_aM_aM    | 0/1;0/0;0/1;0/0     |
| chr6 | 3273372   | 3273372   | C | T | SLC22A23 | exonic | nonsynonymous SNV | SLC22A23:NM_001286455:exon10:c.G901A:p.G3015, SLC22A23:NM_021945:exon11:c.G901A:p.G3015                                                                                                                                                                                                                                                                                                                                                                                                                                                                                                                                                                                                                                                                                                                                                                                                                                                                                                           | 1.036 | 6.22E-05 | 1.40E-05 | Fam44_f_m_aM_uF      | 0/0;0/1;0/1;0/0     |                     |
| chr6 | 3850410   | 3850410   | C | T | FAM50B   | exonic | nonsynonymous SNV | FAM50B:NM_012135:exon2:c.C599T:p.T200M                                                                                                                                                                                                                                                                                                                                                                                                                                                                                                                                                                                                                                                                                                                                                                                                                                                                                                                                                            | 1.029 | 0.0007   | 0.001    | 0.0006               | Fam62_f_m_aM_aM     | 0/1;0/0;0/0;0/1     |
| chr6 | 4943665   | 4943665   | A | G | CDYL     | exonic | nonsynonymous SNV | CDYL:NM_001368127:exon4:c.A536G:p.K179R, CDYL:NM_001143970:exon5:c.A845G:p.K282R, CDYL:NM_001143971:exon5:c.A845G:p.K282R, CDYL:NM_001368126:exon5:c.A1175G:p.K392R, CDYL:NM_004824:exon5:c.A1241G:p.K414R, CDYL:NM_001368125:exon7:c.A1403G:p.K468R                                                                                                                                                                                                                                                                                                                                                                                                                                                                                                                                                                                                                                                                                                                                              | 1.744 | 3.27E-05 |          | Fam68_f_m_aF_uF_uM   | 0/1;0/0;0/1;0/1;0/1 |                     |
| chr6 | 7229463   | 7229463   | T | A | RREB1    | exonic | nonsynonymous SNV | RREB1:NM_001003698:exon10:c.T1364A:p.V455E, RREB1:NM_001003699:exon10:c.T1364A:p.V455E, RREB1:NM_00103700:exon10:c.T1364A:p.V455E, RREB1:NM_001168344:exon10:c.T1364A:p.V455E                                                                                                                                                                                                                                                                                                                                                                                                                                                                                                                                                                                                                                                                                                                                                                                                                     | 1.319 |          |          | Fam51_f_m_aM_uF      | 0/1;0/0;0/1;0/1     |                     |
| chr6 | 11103779  | 11103779  | A | C | ERVFRD-1 | exonic | nonsynonymous SNV | ERVFRD-1:NM_207582:exon2:c.T1532G:p.V511G                                                                                                                                                                                                                                                                                                                                                                                                                                                                                                                                                                                                                                                                                                                                                                                                                                                                                                                                                         | 1.388 |          |          | Fam112_f_m_aM        | 0/1;0/0;0/1         |                     |
| chr6 | 13486704  | 13486704  | C | T | GFOD1    | exonic | nonsynonymous SNV | GFOD1:NM_001242629:exon1:c.G187A:p.D63N, GFOD1:NM_018988:exon1:c.G187A:p.D63N                                                                                                                                                                                                                                                                                                                                                                                                                                                                                                                                                                                                                                                                                                                                                                                                                                                                                                                     | 1.805 |          |          | Fam122_f_m_aM        | 0/1;0/0;0/1         |                     |
| chr6 | 13711061  | 13711061  | G | A | RANBP9   | exonic | nonsynonymous SNV | RANBP9:NM_005493:exon1:c.C445T:p.R149W                                                                                                                                                                                                                                                                                                                                                                                                                                                                                                                                                                                                                                                                                                                                                                                                                                                                                                                                                            | 1.23  | 3.86E-05 | 5.59E-05 | Fam51_f_m_aM_uF      | 0/0;0/1;0/1;0/1     |                     |
| chr6 | 17284683  | 17284683  | C | A | RBM24    | exonic | nonsynonymous SNV | RBM24:NM_153020:exon2:c.C184A:p.H62N, RBM24:NM_001143941:exon3:c.C145A:p.H49N, RBM24:NM_001143942:exon3:c.C319A:p.H107N                                                                                                                                                                                                                                                                                                                                                                                                                                                                                                                                                                                                                                                                                                                                                                                                                                                                           | 1.371 | 0.0005   | 8.38E-05 | Fam110_f_m_aM_aM_uMs | 0/0;0/1;0/0;0/1;0/0 |                     |
| chr6 | 17850333  | 17850333  | A | G | KIF13A   | exonic | nonsynonymous SNV | KIF13A:NM_001105566:exon8:c.T707C:p.L236P, KIF13A:NM_001105567:exon8:c.T707C:p.L236P, KIF13A:NM_001105568:exon8:c.T707C:p.L236P, KIF13A:NM_022113:exon8:c.T707C:p.L236P                                                                                                                                                                                                                                                                                                                                                                                                                                                                                                                                                                                                                                                                                                                                                                                                                           | 1.109 |          |          | Fam31_f_m_aM_uF      | 0/1;0/0;0/1;0/0     |                     |
| chr6 | 20402254  | 20402254  | G | T | E2F3     | exonic | nonsynonymous SNV | E2F3:NM_001949:exon1:c.G22T:p.A8S                                                                                                                                                                                                                                                                                                                                                                                                                                                                                                                                                                                                                                                                                                                                                                                                                                                                                                                                                                 | 1.082 | 0.0002   | 0.0003   | 0.0001               | Fam105_f_m_aM       | 0/0;0/1;0/1         |
| chr6 | 21595615  | 21595615  | T | A | SOX4     | exonic | nonsynonymous SNV | SOX4:NM_003107:exon1:c.T1081A:p.Y361N                                                                                                                                                                                                                                                                                                                                                                                                                                                                                                                                                                                                                                                                                                                                                                                                                                                                                                                                                             | 1.456 |          |          | 1.42E-05             | Fam55_f_m_aM_aM_dM  | 0/0;0/1;0/1;0/1;0/1 |
| chr6 | 24357835  | 24357835  | G | A | KAAG1    | exonic | nonsynonymous SNV | KAAG1:NM_181337:exon1:c.G196A:p.A66T                                                                                                                                                                                                                                                                                                                                                                                                                                                                                                                                                                                                                                                                                                                                                                                                                                                                                                                                                              | 1.761 | 0.0006   | 0.0005   | 9.07E-05             | Fam16_f_m_aM_aM     | 0/1;0/0;0/1;0/1     |
| chr6 | 26444026  | 26444026  | G | A | BTN3A3   | exonic | nonsynonymous SNV | BTN3A3:NM_001242803:exon2:c.G29A:p.C10Y, BTN3A3:NM_006994:exon4:c.G155A:p.C52Y, BTN3A3:NM_197974:exon4:c.G29A:p.C10Y                                                                                                                                                                                                                                                                                                                                                                                                                                                                                                                                                                                                                                                                                                                                                                                                                                                                              | 5     |          |          | Fam26_f_m_aM_uM      | 0/0;0/1;0/1;0/0     |                     |
| chr6 | 26501671  | 26501671  | C | A | BTN1A1   | exonic | nonsynonymous SNV | BTN1A1:NM_001732:exon3:c.C161A:p.P54Q                                                                                                                                                                                                                                                                                                                                                                                                                                                                                                                                                                                                                                                                                                                                                                                                                                                                                                                                                             | 1.237 | 3.27E-05 | 2.09E-05 | Fam60_f_m_aF         | 0/1;0/0;0/1         |                     |
| chr6 | 26501671  | 26501671  | C | A | BTN1A1   | exonic | nonsynonymous SNV | BTN1A1:NM_001732:exon3:c.C161A:p.P54Q                                                                                                                                                                                                                                                                                                                                                                                                                                                                                                                                                                                                                                                                                                                                                                                                                                                                                                                                                             | 1.237 | 3.27E-05 | 2.09E-05 | Fam84_f_m_aF         | 0/1;0/0;0/1         |                     |
| chr6 | 27824414  | 27824414  | C | T | HIST1H4J | exonic | nonsynonymous SNV | HIST1H4J:NM_021968:exon1:c.C290T:p.T97I                                                                                                                                                                                                                                                                                                                                                                                                                                                                                                                                                                                                                                                                                                                                                                                                                                                                                                                                                           | 3.099 | 1.21E-05 |          | Fam85_f_m_aM_aM      | 0/1;0/0;0/1;0/1     |                     |
| chr6 | 27890415  | 27890415  | C | G | HIST1H3J | exonic | nonsynonymous SNV | HIST1H3J:NM_003535:exon1:c.G378C:p.Q126H                                                                                                                                                                                                                                                                                                                                                                                                                                                                                                                                                                                                                                                                                                                                                                                                                                                                                                                                                          | 1.338 | 6.92E-05 | 0.0001   | Fam109_f_m_aM        | 0/1;0/0;0/1         |                     |
| chr6 | 28573244  | 28573244  | G | T | ZBED9    | exonic | nonsynonymous SNV | ZBED9:NM_052923:exon4:c.C2645A:p.A882D, ZBED9:NM_01329616:exon6:c.C2192A:p.A731D                                                                                                                                                                                                                                                                                                                                                                                                                                                                                                                                                                                                                                                                                                                                                                                                                                                                                                                  | 1.203 |          |          | Fam82_f_m_aM_uF      | 0/0;0/1;0/1;0/1     |                     |
| chr6 | 28923493  | 28923493  | G | A | TRIM27   | exonic | nonsynonymous SNV | TRIM27:NM_006510:exon1:c.C140T:p.A47V                                                                                                                                                                                                                                                                                                                                                                                                                                                                                                                                                                                                                                                                                                                                                                                                                                                                                                                                                             | 2.284 | 3.29E-05 |          | Fam22_f_m_aF_aF_uF   | 0/1;0/0;0/1;0/1;0/0 |                     |
| chr6 | 29440556  | 29440556  | C | A | OR10C1   | exonic | nonsynonymous SNV | OR10C1:NM_013941:exon1:c.C541A:p.Q181K                                                                                                                                                                                                                                                                                                                                                                                                                                                                                                                                                                                                                                                                                                                                                                                                                                                                                                                                                            | 1.248 |          |          | Fam20_f_m_aM_uF      | 0/1;0/0;0/1;0/1     |                     |
| chr6 | 29672821  | 29672821  | G | C | ZFP57    | exonic | nonsynonymous SNV | ZFP57:NM_001366333:exon4:c.C1074G:p.H358Q, ZFP57:NM_001109809:exon5:c.C1290G:p.H430Q                                                                                                                                                                                                                                                                                                                                                                                                                                                                                                                                                                                                                                                                                                                                                                                                                                                                                                              | 1.2   | 4.61E-05 | 1.40E-05 | Fam31_f_m_aM_uF      | 0/1;0/0;0/1;0/0     |                     |
| chr6 | 29725186  | 29725186  | C | A | HLA-F    | exonic | nonsynonymous SNV | HLA-F:NM_001098479:exon4:c.C766A:p.P256T, HLA-F:NM_018950:exon4:c.C766A:p.P256T                                                                                                                                                                                                                                                                                                                                                                                                                                                                                                                                                                                                                                                                                                                                                                                                                                                                                                                   | 1.467 | 0.0003   | 7.82E-05 | 6.28E-05             | Fam12_f_m_aM_uM_aM  | 0/0;0/1;0/1;0/1;0/0 |
| chr6 | 30071508  | 30071508  | T | C | RNF39    | exonic | nonsynonymous SNV | RNF39:NM_025236:exon4:c.A866G:p.E289G, RNF39:NM_170769:exon4:c.A866G:p.E289G                                                                                                                                                                                                                                                                                                                                                                                                                                                                                                                                                                                                                                                                                                                                                                                                                                                                                                                      | 2.537 |          |          | Fam117_f_m_aM_aF     | 0/0;0/1;0/1;0/0     |                     |



|      |          |          |   |   |                 |        |                   |                                                                                                                                                                                                                                                    |       |          |          |          |                      |                     |                 |
|------|----------|----------|---|---|-----------------|--------|-------------------|----------------------------------------------------------------------------------------------------------------------------------------------------------------------------------------------------------------------------------------------------|-------|----------|----------|----------|----------------------|---------------------|-----------------|
| chr6 | 30342159 | 30342159 | C | G | TRIM39          | exonic | nonsynonymous SNV | TRIM39:NM_001369521:exon8:c.C1367G:p.T456S,TRIM39:NM_001369522:exon8:c.C1367G:p.T456S,TRIM39:NM_172016:exon8:c.C1367G:p.T456S,TRIM39:NM_001369523:exon9:c.C1367G:p.T456S,TRIM39:NM_021253:exon9:c.C1457G:p.T486S                                   | 2.212 | .        | .        | .        | .                    | Fam44_f_m_aM_uF     | 0/1;0/0;0/1;0/1 |
| chr6 | 30345376 | 30345376 | G | A | RPP21;TRIM39-RP | exonic | nonsynonymous SNV | RPP21:NM_001199120:exon2:c.G136A:p.A46T,RPP21:NM_001199121:exon2:c.G136A:p.A46T,RPP21:NM_024839:exon2:c.G136A:p.A46T,TRIM39-RPP21:NM_001199119:exon7:c.G1183A:p.A395T                                                                              | 1.376 | .        | 1.15E-05 | .        | .                    | Fam4_f_m_aM         | 0/0;0/1;0/1     |
| chr6 | 30345495 | 30345495 | C | G | RPP21;TRIM39-RP | exonic | nonsynonymous SNV | RPP21:NM_001199120:exon3:c.C187G:p.P63A,RPP21:NM_001199121:exon3:c.C163G:p.P55A,RPP21:NM_024839:exon3:c.C163G:p.P55A,TRIM39-RPP21:NM_001199119:exon8:c.C1210G:p.P404A                                                                              | 1.428 | 0.0003   | 0.0003   | 0.0002   | Fam98_f_m_aM         | 0/0;0/1;0/1         |                 |
| chr6 | 30554883 | 30554883 | A | G | GNL1            | exonic | nonsynonymous SNV | GNL1:NM_005275:exon4:c.T409C:p.Y137H                                                                                                                                                                                                               | 1.881 | .        | .        | .        | Fam102_f_m_aM        | 0/0;0/1;0/1         |                 |
| chr6 | 30582439 | 30582439 | G | A | ABCF1           | exonic | nonsynonymous SNV | ABCF1:NM_001025091:exon9:c.G724A:p.G242R                                                                                                                                                                                                           | 1.037 | .        | 1.18E-05 | .        | Fam18_f_m_aM_uF      | 0/0;0/1;0/1;0/0     |                 |
| chr6 | 30604624 | 30604624 | C | G | PPP1R10         | exonic | nonsynonymous SNV | PPP1R10:NM_002714:exon12:c.G1066C:p.V356L                                                                                                                                                                                                          | 1.89  | .        | .        | .        | Fam71_f_m_aF         | 0/0;0/1;0/1         |                 |
| chr6 | 30740532 | 30740532 | A | C | FLOT1           | exonic | nonsynonymous SNV | FLOT1:NM_001318875:exon6:c.T390G:p.I130M,FLOT1:NM_005803:exon7:c.T534G:p.I178M                                                                                                                                                                     | 1.499 | .        | .        | .        | Fam85_f_m_aM_aM      | 0/1;0/0;0/1;0/1     |                 |
| chr6 | 30915992 | 30915992 | G | A | VARS2           | exonic | nonsynonymous SNV | VARS2:NM_001167733:exon5:c.G98A:p.R33H,VARS2:NM_001167734:exon6:c.G608A:p.R203H,VARS2:NM_020442:exon6:c.G518A:p.R173H                                                                                                                              | 1.198 | 7.34E-05 | 1.12E-05 | 2.79E-05 | Fam18_f_m_aM_uF      | 0/1;0/0;0/1;0/1     |                 |
| chr6 | 30921957 | 30921957 | G | A | VARS2           | exonic | nonsynonymous SNV | VARS2:NM_001167733:exon18:c.G1348A:p.A450T,VARS2:NM_001167734:exon19:c.G1858A:p.A620T,VARS2:NM_020442:exon19:c.G1768A:p.A590T                                                                                                                      | 1.284 | .        | .        | .        | Fam12_f_m_aM_uM_aM   | 0/0;0/1;0/0;0/0;0/1 |                 |
| chr6 | 30941073 | 30941073 | G | C | MUCL3           | exonic | nonsynonymous SNV | MUCL3:NM_080870:exon1:c.G74C:p.W255                                                                                                                                                                                                                | 1.534 | 0.0003   | 0.0003   | 0.0002   | Fam109_f_m_aM        | 0/1;0/0;0/1         |                 |
| chr6 | 31145180 | 31145180 | C | T | CCHCR1          | exonic | nonsynonymous SNV | CCHCR1:NM_001105563:exon13:c.G1754A:p.R585Q,CCHCR1:NM_001105564:exon13:c.G1862A:p.R621Q,CCHCR1:NM_019052:exon13:c.G1955A:p.R532Q                                                                                                                   | 1.36  | .        | 3.28E-05 | 6.98E-06 | Fam50_f_m_aF         | 0/0;0/1;0/1         |                 |
| chr6 | 31150972 | 31150972 | G | A | CCHCR1          | exonic | nonsynonymous SNV | CCHCR1:NM_001105563:exon5:c.C844T:p.R282W,CCHCR1:NM_001105564:exon5:c.C952T:p.R138W,CCHCR1:NM_019052:exon5:c.C685T:p.R229W                                                                                                                         | 1.234 | 7.35E-05 | 0.0002   | 2.79E-05 | Fam103_f_m_aM        | 0/1;0/0;0/1         |                 |
| chr6 | 31644116 | 31644116 | G | A | BAG6            | exonic | nonsynonymous SNV | BAG6:NM_001098534:exon12:c.C1526T:p.S509F,BAG6:NM_001199697:exon12:c.C1526T:p.S509F,BAG6:NM_001199698:exon12:c.C1526T:p.S509F,BAG6:NM_004639:exon12:c.C1544T:p.S515F,BAG6:NM_080702:exon12:c.C1526T:p.S509F,BAG6:NM_080703:exon12:c.C1526T:p.S509F | 1.287 | .        | 1.12E-05 | .        | Fam52_f_m_aM         | 0/0;0/1;0/1         |                 |
| chr6 | 31696971 | 31696971 | G | A | ABHD16A         | exonic | nonsynonymous SNV | ABHD16A:NM_001177515:exon3:c.C307T:p.R103W,ABHD16A:NM_021160:exon5:c.C406T:p.R136W                                                                                                                                                                 | 1.456 | 7.35E-05 | 0.0003   | 9.77E-05 | Fam112_f_m_aM        | 0/1;0/0;0/1         |                 |
| chr6 | 31791737 | 31791737 | G | A | VARS            | exonic | nonsynonymous SNV | VARS:NM_006295:exon8:c.C973T:p.R325C                                                                                                                                                                                                               | 1.532 | .        | 1.15E-05 | .        | Fam14_f_m_aM_aM      | 0/1;0/0;0/1;0/0     |                 |
| chr6 | 31859799 | 31859799 | A | G | NEU1            | exonic | nonsynonymous SNV | NEU1:NM_000434:exon6:c.T1168C:p.V390H                                                                                                                                                                                                              | 1.468 | .        | .        | .        | Fam69_f_m_aM         | 0/1;0/0;0/1         |                 |
| chr6 | 31860123 | 31860123 | C | T | NEU1            | exonic | nonsynonymous SNV | NEU1:NM_000434:exon5:c.G940A:p.V314M                                                                                                                                                                                                               | 1.357 | .        | 3.29E-05 | .        | Fam19_f_m_aM         | 0/1;0/0;0/1         |                 |
| chr6 | 31865992 | 31865992 | C | A | SLC44A4         | exonic | nonsynonymous SNV | SLC44A4:NM_001178044:exon13:c.G1242T:p.W414C,SLC44A4:NM_001178045:exon14:c.G1140T:p.W380S,SLC44A4:NM_025257:exon14:c.G1368T:p.W456C                                                                                                                | 1.024 | .        | .        | .        | Fam7_f_m_aM_aM_uM    | 0/0;0/1;0/1;0/0;0/1 |                 |
| chr6 | 31884464 | 31884464 | G | A | EHMT2           | exonic | nonsynonymous SNV | EHMT2:NM_001289413:exon19:c.C2768T:p.A923V,EHMT2:NM_001363689:exon20:c.C2870T:p.A957V,EHMT2:NM_025256:exon20:c.C2597T:p.A866V,EHMT2:NM_001318833:exon21:c.C2093T:p.A698V,EHMT2:NM_006709:exon21:c.C2699T:p.A900V                                   | 1.902 | .        | 1.15E-05 | .        | Fam89_f_m_aM         | 0/0;0/1;0/1         |                 |
| chr6 | 31943960 | 31943960 | C | T | C2              | exonic | nonsynonymous SNV | C2:NM_001178063:exon10:c.C1135T:p.R379W,C2:NM_001282457:exon10:c.C1039T:p.R347W,C2:NM_001145903:exon12:c.C1381T:p.R461W,C2:NM_000063:exon14:c.C1777T:p.R593W,C2:NM_001282458:exon14:c.C1690T:p.R564W                                               | 1.045 | .        | 2.30E-05 | 2.09E-05 | Fam122_f_m_aM        | 0/1;0/0;0/1         |                 |
| chr6 | 31961059 | 31961059 | C | A | SKIV2L          | exonic | nonsynonymous SNV | SKIV2L:NM_006929:exon7:c.C563A:p.P188H                                                                                                                                                                                                             | 1.288 | .        | .        | .        | Fam19_f_m_aM         | 0/0;0/1;0/1         |                 |
| chr6 | 31971520 | 31971520 | G | T | DXO             | exonic | nonsynonymous SNV | DXO:NM_005510:exon2:c.C156A:p.F52L                                                                                                                                                                                                                 | 1.267 | .        | .        | .        | Fam113_f_m_aF_raM_uF | 0/0;0/0;0/0;0/1;0/0 |                 |
| chr6 | 32119957 | 32119957 | A | T | ATF6B           | exonic | nonsynonymous SNV | ATF6B:NM_001136153:exon9:c.T824A:p.V275E,ATF6B:NM_004381:exon9:c.T833A:p.V278E                                                                                                                                                                     | 1.294 | 0.0004   | 0.0005   | 0.0002   | Fam48_f_m_aM_uM      | 0/1;0/0;0/1;0/1     |                 |
| chr6 | 32196401 | 32196401 | C | T | NOTCH4          | exonic | nonsynonymous SNV | NOTCH4:NM_004557:exon29:c.G5221A:p.A1741T                                                                                                                                                                                                          | 1.598 | 7.35E-05 | 0.0001   | 3.49E-05 | Fam23_f_m_aM_dF_uFs  | 0/0;0/1;0/1;0/1;0/0 |                 |
| chr6 | 32443893 | 32443893 | C | T | HLA-DRA         | exonic | nonsynonymous SNV | HLA-DRA:NM_019111:exon4:c.C748T:p.R250C                                                                                                                                                                                                            | 1.479 | .        | 0.0002   | 4.19E-05 | Fam12_f_m_aM_uM_aM   | 0/1;0/0;0/0;0/0;0/1 |                 |
| chr6 | 32841588 | 32841588 | G | A | PSMB8           | exonic | nonsynonymous SNV | PSMB8:NM_004159:exon5:c.C673T:p.R225C,PSMB8:NM_148919:exon5:c.C685T:p.R229C                                                                                                                                                                        | 1.52  | .        | .        | 6.98E-06 | Fam30_f_m_aM_uM      | 0/1;0/0;0/1;0/1     |                 |
| chr6 | 32847643 | 32847643 | A | C | TAP1            | exonic | nonsynonymous SNV | TAP1:NM_000593:exon9:c.T1953G:p.F651L,TAP1:NM_001292022:exon9:c.T1170G:p.F390L                                                                                                                                                                     | 1.621 | .        | .        | 0        | Fam19_f_m_aM         | 0/0;0/1;0/1         |                 |
| chr6 | 32949683 | 32949683 | G | A | HLA-DMA         | exonic | nonsynonymous SNV | HLA-DMA:NM_006120:exon3:c.C580T:p.P194S                                                                                                                                                                                                            | 1.221 | .        | 7.52E-05 | .        | Fam50_f_m_aF         | 0/1;0/0;0/1         |                 |
| chr6 | 33080786 | 33080786 | G | T | HLA-DPB1        | exonic | nonsynonymous SNV | HLA-DPB1:NM_002121:exon2:c.G215T:p.G72V                                                                                                                                                                                                            | 2.038 | .        | 1.13E-05 | .        | Fam4_f_m_aM          | 0/1;0/0;0/1         |                 |
| chr6 | 33251559 | 33251559 | G | A | VPS52           | exonic | nonsynonymous SNV | VPS52:NM_001289176:exon17:c.C1417T:p.R473W,VPS52:NM_001289174:exon18:c.C1783T:p.R595W,VPS52:NM_001289175:exon19:c.C1609T:p.R537W,VPS52:NM_022553:exon19:c.C1984T:p.R662W                                                                           | 2.76  | .        | 3.27E-05 | .        | Fam113_f_m_aF_raM_uF | 0/1;0/0;0/1;0/0;0/0 |                 |
| chr6 | 33264492 | 33264492 | G | G | VPS52           | exonic | nonsynonymous SNV | VPS52:NM_001289176:exon12:c.G839C:p.W280S,VPS52:NM_001289174:exon13:c.G1205C:p.W402S,VPS52:NM_001289175:exon14:c.G1031C:p.W344S,VPS52:NM_022553:exon14:c.G1406C:p.W469S                                                                            | 1.388 | .        | .        | .        | Fam113_f_m_aF_raM_uF | 0/1;0/0;0/1;0/0;0/0 |                 |
| chr6 | 33270239 | 33270239 | C | G | VPS52           | exonic | nonsynonymous SNV | VPS52:NM_022553:exon2:c.G135C:p.L45F                                                                                                                                                                                                               | 1.173 | .        | .        | .        | Fam117_f_m_aM_aF     | 0/1;0/0;0/1;0/1     |                 |

|      |          |          |   |   |                 |          |                   |                                                                                                                                                                                                                                                       |       |          |          |          |                        |                         |                 |
|------|----------|----------|---|---|-----------------|----------|-------------------|-------------------------------------------------------------------------------------------------------------------------------------------------------------------------------------------------------------------------------------------------------|-------|----------|----------|----------|------------------------|-------------------------|-----------------|
| chr6 | 33315905 | 33315905 | C | G | ZBTB22          | exonic   | nonsynonymous SNV | ZBTB22:NM_001145338:exon2:c.G1012C:p.E338Q,ZBTB22:NM_005453:exon2:c.G1012C:p.E338Q                                                                                                                                                                    | 1.264 |          |          |          |                        | Fam121_f_m_aF_aM        | 0/1;0/0;0/1;0/1 |
| chr6 | 33405161 | 33405161 | C | T | KIFC1           | exonic   | nonsynonymous SNV | KIFC1:NM_002263:exon7:c.C1066T:p.R356W                                                                                                                                                                                                                | 1.229 | 7.35E-05 | 0.0001   | 2.79E-05 | Fam84_f_m_aF           | 0/0;0/1;0/1             |                 |
| chr6 | 33405596 | 33405596 | A | G | KIFC1           | exonic   | nonsynonymous SNV | KIFC1:NM_002263:exon7:c.A1501G:p.N501D                                                                                                                                                                                                                | 1.289 |          |          | 2.97E-05 | Fam71_f_m_aF           | 0/0;0/1;0/1             |                 |
| chr6 | 33675785 | 33675785 | G | T | ITPR3           | exonic   | nonsynonymous SNV | ITPR3:NM_002224:exon25:c.G3211T:p.V1071F                                                                                                                                                                                                              | 1.048 | 0.0002   | 0.0002   | 0.0001   | Fam37_f_m_aF_uM        | 0/1;0/0;0/1;0/0         |                 |
| chr6 | 33695740 | 33695740 | G | A | ITPR3           | exonic   | nonsynonymous SNV | ITPR3:NM_002224:exon58:c.G7976A:p.R2659H                                                                                                                                                                                                              | 1.936 |          |          | 1.12E-05 | Fam122_f_m_aM          | 0/0;0/1;0/1             |                 |
| chr6 | 34133396 | 34133396 | G | C | GRM4            | exonic   | nonsynonymous SNV | GRM4:NM_000841:exon2:c.C1017G:p.P34R,GRM4:NM_001256811:exon2:c.C101G:p.P34R<br>RPS10:NM_001014:exon4:c.C344G:p.A115G,RPS10-NUDT3:NM_001202470:exon4:c.C344G:p.A115G,RPS10:NM_001203245:exon4:c.C344G:p.A115G,RPS10:NM_001204091:exon4:c.C344G:p.A115G | 1.583 | 0.0001   | 4.51E-05 | 4.88E-05 | Fam66_f_m_aM           | 0/0;0/1;0/1             |                 |
| chr6 | 34421786 | 34421786 | G | C | RPS10;RPS10-NUC | exonic   | nonsynonymous SNV |                                                                                                                                                                                                                                                       | 1.688 |          |          | 1.12E-05 | Fam28_f_m_aF_uF        | 0/1;0/0;0/1;0/0         |                 |
| chr6 | 34425795 | 34425795 | C | G | RPS10           | splicing | .                 | .                                                                                                                                                                                                                                                     | 0.221 |          |          | 2.09E-05 | Fam6_f_m_aM            | 0/0;0/1;0/1             |                 |
| chr6 | 35081099 | 35081099 | C | T | ANKS1A          | exonic   | nonsynonymous SNV | ANKS1A:NM_015245:exon17:c.C2650T:p.R884C                                                                                                                                                                                                              | 1.049 |          | 0.0002   | 6.98E-06 | Fam60_f_m_aF           | 0/0;0/1;0/1             |                 |
| chr6 | 35241240 | 35241240 | T | C | SCUBE3          | exonic   | nonsynonymous SNV | SCUBE3:NM_001303136:exon10:c.T1166C:p.L389P,SCUBE3:NM_152753:exon10:c.T1169C:p.L390P                                                                                                                                                                  | 2.303 | 0.0003   | 0.0008   | 0.0004   | Fam2_f_m_aF            | 0/0;0/1;0/1             |                 |
| chr6 | 35509890 | 35509890 | G | A | TULP1           | exonic   | nonsynonymous SNV | TULP1:NM_001289395:exon5:c.C379T:p.R127C,TULP1:NM_003322:exon6:c.C538T:p.R180C                                                                                                                                                                        | 1.057 |          |          | 9.81E-05 | Fam108_f_m_aM          | 0/0;0/1;0/1             |                 |
| chr6 | 35805857 | 35805857 | G | A | LHFP15          | exonic   | nonsynonymous SNV | LHFP15:NM_182548:exon1:c.G187A:p.G63S                                                                                                                                                                                                                 | 1.036 |          | 0.0004   |          | Fam75_f_m_aM           | 0/1;0/0;0/1             |                 |
| chr6 | 36230577 | 36230577 | C | A | BRPF3           | exonic   | nonsynonymous SNV | BRPF3:NM_015695:exon13:c.C3586A:p.P1196T                                                                                                                                                                                                              | 1.043 |          |          | 2.24E-05 | Fam110_f_m_aM_aM_uMs   | 0/0;0/1;0/0;0/1;0/0     |                 |
| chr6 | 36479191 | 36479191 | G | A | KCTD20          | exonic   | nonsynonymous SNV | KCTD20:NM_001286580:exon3:c.G70A:p.G245,KCTD20:NM_173562:exon4:c.G505A:p.G169S                                                                                                                                                                        | 1.228 | 0.0001   | 0.0001   | 0.0001   | Fam79_f_m_aM_uM        | 0/0;0/1;0/1;0/1         |                 |
| chr6 | 36959205 | 36959205 | C | G | PI16            | exonic   | nonsynonymous SNV | PI16:NM_153370:exon2:c.C232G:p.H78D,PI16:NM_001199159:exon3:c.C232G:p.H78D                                                                                                                                                                            | 1.236 |          |          | 5.84E-05 | Fam77_f_m_aM_aF_uM_uFs | 0/1;0/0;0/0;0/1;0/1;0/0 |                 |
| chr6 | 37171017 | 37171017 | G | T | PIM1            | exonic   | nonsynonymous SNV | PIM1:NM_001243186:exon3:c.G499T:p.D167Y,PIM1:NM_02648:exon3:c.G226T:p.D76Y                                                                                                                                                                            | 1.221 | 0.0001   | 2.24E-05 | 2.79E-05 | Fam4_f_m_aM            | 0/1;0/0;0/1             |                 |
| chr6 | 37453280 | 37453280 | C | T | CMTR1           | exonic   | nonsynonymous SNV | CMTR1:NM_015050:exon8:c.C745T:p.R249C                                                                                                                                                                                                                 | 1.076 |          |          | 7.45E-05 | Fam57_f_m_aM_uF        | 0/0;0/1;0/1;0/1         |                 |
| chr6 | 37471032 | 37471032 | T | C | CMTR1           | exonic   | nonsynonymous SNV | CMTR1:NM_015050:exon14:c.T1517C:p.L506P                                                                                                                                                                                                               | 1.363 |          |          |          | Fam6_f_m_aM            | 0/0;0/1;0/1             |                 |
| chr6 | 37650117 | 37650117 | T | C | MDGA1           | exonic   | nonsynonymous SNV | MDGA1:NM_153487:exon8:c.A1601G:p.N534S                                                                                                                                                                                                                | 1.252 | 7.36E-05 | 2.33E-05 | 2.79E-05 | Fam77_f_m_aM_aF_uM_uFs | 0/0;0/1;0/0;0/1;0/1;0/1 |                 |
| chr6 | 37654818 | 37654818 | G | A | MDGA1           | exonic   | nonsynonymous SNV | MDGA1:NM_153487:exon5:c.C694T:p.R232W                                                                                                                                                                                                                 | 1.49  |          |          | 6.57E-05 | Fam47_f_m_aM           | 0/1;0/0;0/1             |                 |
| chr6 | 37655863 | 37655863 | G | A | MDGA1           | exonic   | nonsynonymous SNV | MDGA1:NM_153487:exon4:c.C416T:p.T139M                                                                                                                                                                                                                 | 1.871 | 0.0002   | 0.0001   | 6.98E-05 | Fam99_f_m_aM_aM        | 0/0;0/1;0/1;0/0         |                 |
| chr6 | 37658392 | 37658392 | C | T | MDGA1           | exonic   | nonsynonymous SNV | MDGA1:NM_153487:exon3:c.G235A:p.A79T                                                                                                                                                                                                                  | 1.645 |          |          | 3.32E-05 | Fam38_f_m_aM           | 0/0;0/1;0/1             |                 |
| chr6 | 39079178 | 39079178 | T | A | GLP1R           | exonic   | nonsynonymous SNV | GLP1R:NM_002062:exon10:c.T1021A:p.C341S                                                                                                                                                                                                               | 1.047 | 0.0002   | 7.82E-05 | 5.58E-05 | Fam10_f_m_aM_uF        | 0/0;0/1;0/1;0/1         |                 |
| chr6 | 40432920 | 40432920 | A | T | LRFN2           | exonic   | nonsynonymous SNV | LRFN2:NM_020737:exon2:c.T194A:p.I65N                                                                                                                                                                                                                  | 1.03  |          |          | 3.28E-05 | Fam4_f_m_aM            | 0/1;0/0;0/1             |                 |
| chr6 | 42659757 | 42659757 | A | G | UBR2            | exonic   | nonsynonymous SNV | UBR2:NM_001363705:exon30:c.A3344G:p.Q1115R,UBR2:NM_015255:exon30:c.A3344G:p.Q1115R                                                                                                                                                                    | 1.261 |          |          | 1.12E-05 | Fam91_m_aM_dM_aM_dM    | 0/1;0/1;0/1;0/0;0/1     |                 |
| chr6 | 42960792 | 42960792 | C | G | GNMT            | exonic   | nonsynonymous SNV | GNMT:NM_001318865:exon1:c.C25G:p.R9G,GNMT:NM_018960:exon1:c.C25G:p.R9G                                                                                                                                                                                | 2.551 |          |          |          | Fam12_f_m_aM_uM_aM     | 0/1;0/0;0/0;0/0;0/1     |                 |
| chr6 | 43142233 | 43142233 | C | T | PTK7            | exonic   | nonsynonymous SNV | PTK7:NM_152881:exon10:c.C1591T:p.R531C,PTK7:NM_152880:exon12:c.C1861T:p.R621C,PTK7:NM_001270398:exon13:c.C2005T:p.R669C,PTK7:NM_002821:exon13:c.C1981T:p.R661C                                                                                        | 2.128 |          |          | 3.28E-05 | Fam108_f_m_aM          | 0/1;0/0;0/1             |                 |
| chr6 | 43188541 | 43188541 | G | A | CUL9            | exonic   | nonsynonymous SNV | CUL9:NM_015089:exon8:c.G2006A:p.R669Q                                                                                                                                                                                                                 | 1.151 | 7.34E-05 | 0.0002   | 6.98E-06 | Fam85_f_m_aM_aM        | 0/0;0/1;0/1;0/1         |                 |
| chr6 | 43204488 | 43204488 | G | A | CUL9            | exonic   | nonsynonymous SNV | CUL9:NM_015089:exon21:c.G4288A:p.V1430M                                                                                                                                                                                                               | 1.08  |          | 0.0004   | 3.49E-05 | Fam57_f_m_aM_uF        | 0/1;0/0;0/1;0/0         |                 |
| chr6 | 43221273 | 43221273 | G | A | CUL9            | exonic   | nonsynonymous SNV | CUL9:NM_015089:exon34:c.G6704A:p.R2235H                                                                                                                                                                                                               | 2.551 |          |          | 9.84E-05 | Fam63_f_m_aF           | 0/1;0/0;0/1             |                 |
| chr6 | 43226051 | 43226051 | G | A | DNPH1           | exonic   | nonsynonymous SNV | DNPH1:NM_006443:exon3:c.C358T:p.R120C,DNPH1:NM_199184:exon3:c.C358T:p.R120C                                                                                                                                                                           | 1.385 |          | 0.0002   | 3.49E-05 | Fam63_f_m_aF           | 0/1;0/0;0/1             |                 |
| chr6 | 43226138 | 43226138 | C | T | DNPH1           | exonic   | nonsynonymous SNV | DNPH1:NM_006443:exon3:c.G271A:p.V91M,DNPH1:NM_199184:exon3:c.G271A:p.V91M                                                                                                                                                                             | 1.179 | 0.0006   | 0.001    | 0.0001   | Fam67_f_m_aM_uF        | 0/0;0/1;0/1;0/0         |                 |
| chr6 | 44265406 | 44265406 | G | A | NFKBIE          | exonic   | nonsynonymous SNV | NFKBIE:NM_004556:exon1:c.C358T:p.R120W                                                                                                                                                                                                                | 1.184 |          | 0.0001   | 6.98E-06 | Fam32_f_m_aM_uM        | 0/1;0/0;0/1;0/1         |                 |
| chr6 | 46662498 | 46662498 | G | A | SLC25A27        | exonic   | nonsynonymous SNV | SLC25A27:NM_001204051:exon4:c.G506A:p.R169Q,SLC25A27:NM_001204052:exon4:c.G506A:p.R169Q,SLC25A27:NM_004277:exon4:c.G506A:p.R169Q                                                                                                                      | 1.44  | 0.0003   | 0.0002   | 0.0001   | Fam13_f_m_aM           | 0/1;0/0;0/1             |                 |
| chr6 | 56463131 | 56463131 | T | C | DST             | exonic   | nonsynonymous SNV | DST:NM_015548:exon82:c.A15044G:p.Y5015C,DST:NM_183380:exon92:c.A16022G:p.Y5341C,DST:NM_001144770:exon93:c.A16142G:p.Y5381C,DST:NM_001144769:exon95:c.A16556G:p.Y5519C                                                                                 | 1.532 |          | 0.0006   | 1.40E-05 | Fam116_f_m_aM_aF       | 0/1;0/0;0/1;0/0         |                 |
| chr6 | 56470213 | 56470213 | A | T | DST             | exonic   | nonsynonymous SNV | DST:NM_015548:exon77:c.T14522A:p.I4841N,DST:NM_183380:exon87:c.T15500A:p.I5167N,DST:NM_001144770:exon88:c.T15620A:p.I5207N,DST:NM_001144769:exon90:c.T16034A:p.I5345N                                                                                 | 1.824 |          |          |          | Fam54_f_m_aM_uF        | 0/1;0/0;0/1;0/1         |                 |
| chr6 | 56487174 | 56487174 | G | T | DST             | exonic   | nonsynonymous SNV | DST:NM_015548:exon68:c.C13108A:p.L4370M,DST:NM_183380:exon78:c.C14086A:p.L4696M,DST:NM_001144770:exon79:c.C14206A:p.L4736M,DST:NM_001144769:exon81:c.C14620A:p.L4874M                                                                                 | 1.293 |          | 7.71E-05 |          | Fam49_f_m_aM           | 0/1;0/0;0/1             |                 |



|      |           |           |   |   |          |        |                   |                                                                                                                                                                                                                                                                   |       |          |          |          |                     |                     |                 |
|------|-----------|-----------|---|---|----------|--------|-------------------|-------------------------------------------------------------------------------------------------------------------------------------------------------------------------------------------------------------------------------------------------------------------|-------|----------|----------|----------|---------------------|---------------------|-----------------|
| chr6 | 87015897  | 87015897  | T | G | HTR1E    | exonic | nonsynonymous SNV | HTR1E:NM_000865:exon2:c.T563G;p.L188R                                                                                                                                                                                                                             | 1.43  | .        | .        | .        | .                   | Fam72_f_m_aF_uF     | 0/0;0/1;0/1;0/1 |
| chr6 | 87016258  | 87016258  | C | G | HTR1E    | exonic | nonsynonymous SNV | HTR1E:NM_000865:exon2:c.C924G;p.F308L                                                                                                                                                                                                                             | 1.457 | .        | .        | .        | .                   | Fam71_f_m_aF        | 0/0;0/1;0/1     |
| chr6 | 89098933  | 89098933  | C | T | SRSF12   | exonic | nonsynonymous SNV | SRSF12:NM_080743:exon5:c.G431A;p.R144Q                                                                                                                                                                                                                            | 1.133 | 0.0006   | 0.0007   | 2.79E-05 | Fam22_f_m_aF_aF_uF  | 0/1;0/0;0/1;0/1;0/0 |                 |
| chr6 | 89146344  | 89146344  | A | G | PM20D2   | exonic | nonsynonymous SNV | PM20D2:NM_001010853:exon1:c.A200G;p.E67G                                                                                                                                                                                                                          | 1.082 | .        | 0.0004   | 2.09E-05 | Fam105_f_m_aM       | 0/0;0/1;0/1         |                 |
| chr6 | 90544605  | 90544605  | C | T | MAP3K7   | exonic | nonsynonymous SNV | MAP3K7:NM_145331:exon12:c.G1238A;p.R413H,MAP3K7:NM_145332:exon12:c.G1238A;p.R413H                                                                                                                                                                                 | 1.3   | .        | 1.12E-05 | .        | Fam92_f_m_aM_raM    | 0/1;0/0;0/1;0/1     |                 |
| chr6 | 107070229 | 107070229 | G | A | BEND3    | exonic | nonsynonymous SNV | BEND3:NM_001367314:exon4:c.C962T;p.T321M,BEND3:NM_001080450:exon5:c.C962T;p.T321M                                                                                                                                                                                 | 1.061 | .        | 3.29E-05 | .        | Fam102_f_m_aM       | 0/1;0/0;0/1         |                 |
| chr6 | 109979671 | 109979671 | C | T | GPR6     | exonic | nonsynonymous SNV | GPR6:NM_005284:exon2:c.C559T;p.L187F,GPR6:NM_001286099:exon3:c.C604T;p.L202F                                                                                                                                                                                      | 1.762 | .        | 3.27E-05 | 1.40E-05 | Fam33_f_m_aM_uM     | 0/0;0/1;0/1;0/1     |                 |
| chr6 | 111562995 | 111562995 | G | C | TRAF3IP2 | exonic | nonsynonymous SNV | TRAF3IP2:NM_001164283:exon3:c.C153G;p.F51L,TRAF3IP2:NM_001164281:exon8:c.C1518G;p.F506L,TRAF3IP2:NM_147686:exon8:c.C1521G;p.F507L,TRAF3IP2:NM_147200:exon9:c.C1548G;p.F516L                                                                                       | 2.382 | .        | .        | .        | Fam19_f_m_aM        | 0/0;0/1;0/1         |                 |
| chr6 | 117676001 | 117676001 | G | C | NUS1     | exonic | nonsynonymous SNV | NUS1:NM_138459:exon1:c.G331C;p.E111Q                                                                                                                                                                                                                              | 2.946 | .        | .        | .        | Fam121_f_m_aF_aM    | 0/1;0/0;0/0;0/1     |                 |
| chr6 | 118314152 | 118314152 | C | A | SLC35F1  | exonic | nonsynonymous SNV | SLC35F1:NM_001029858:exon8:c.C1127A;p.P376H                                                                                                                                                                                                                       | 1.352 | 0.0008   | 0.0009   | 0.0004   | Fam44_f_m_aM_uF     | 0/1;0/0;0/1;0/1     |                 |
| chr6 | 122997919 | 122997919 | C | G | CLVS2    | exonic | nonsynonymous SNV | CLVS2:NM_001010852:exon2:c.C142G;p.R48G                                                                                                                                                                                                                           | 1.297 | .        | .        | .        | Fam44_f_m_aM_uF     | 0/0;0/0;0/1;0/0     |                 |
| chr6 | 122997994 | 122997994 | G | C | CLVS2    | exonic | nonsynonymous SNV | CLVS2:NM_001010852:exon2:c.G217C;p.A73P                                                                                                                                                                                                                           | 1.837 | .        | .        | .        | Fam87_f_m_aM_uM     | 0/0;0/1;0/1;0/0     |                 |
| chr6 | 123010985 | 123010985 | G | T | CLVS2    | exonic | nonsynonymous SNV | CLVS2:NM_001010852:exon3:c.G390T;p.R130S                                                                                                                                                                                                                          | 1.034 | .        | .        | .        | Fam80_f_m_aM_uM     | 0/0;0/1;0/1;0/1     |                 |
| chr6 | 136924112 | 136924112 | C | G | SLC35D3  | exonic | nonsynonymous SNV | SLC35D3:NM_001008783:exon2:c.C667G;p.P223A                                                                                                                                                                                                                        | 1.528 | .        | .        | .        | Fam7_f_m_aM_aM_uM   | 0/0;0/1;0/0;0/1;0/0 |                 |
| chr6 | 137017103 | 137017103 | A | T | IL20RA   | exonic | nonsynonymous SNV | IL20RA:NM_014432:exon2:c.T89A;p.V30D                                                                                                                                                                                                                              | 1.072 | .        | 1.12E-05 | .        | Fam54_f_m_aM_uF     | 0/0;0/1;0/1;0/1     |                 |
| chr6 | 137493999 | 137493999 | G | A | OLIG3    | exonic | nonsynonymous SNV | OLIG3:NM_175747:exon1:c.C172T;p.R58W                                                                                                                                                                                                                              | 1.234 | .        | .        | .        | Fam81_f_m_aM_uM     | 0/1;0/0;0/1;0/0     |                 |
| chr6 | 137874994 | 137874994 | T | C | TNFAIP3  | exonic | nonsynonymous SNV | TNFAIP3:NM_001270507:exon3:c.T445C;p.S149P,TNFAIP3:NM_006290:exon3:c.T445C;p.S149P                                                                                                                                                                                | 1.151 | .        | .        | .        | Fam23_f_m_aM_dF_uFs | 0/1;0/0;0/1;0/1;0/0 |                 |
| chr6 | 137881303 | 137881303 | A | C | TNFAIP3  | exonic | nonsynonymous SNV | TNFAIP3:NM_001270507:exon9:c.A2357C;p.K786T,TNFAIP3:NM_06290:exon9:c.A2357C;p.K786T                                                                                                                                                                               | 1.119 | .        | 4.33E-05 | .        | Fam38_f_m_aM        | 0/0;0/1;0/1         |                 |
| chr6 | 146304726 | 146304726 | A | G | GRM1     | exonic | nonsynonymous SNV | GRM1:NM_001278064:exon3:c.A1066G;p.K356E,GRM1:NM_001278066:exon3:c.A1066G;p.K356E,GRM1:NM_001278067:exon3:c.A1066G;p.K356E,GRM1:NM_001278065:exon4:c.A1066G;p.K356E                                                                                               | 1.077 | .        | .        | .        | Fam12_f_m_aM_uM_aM  | 0/1;0/0;0/1;0/1;0/1 |                 |
| chr6 | 147363355 | 147363355 | G | A | STXBPS   | exonic | nonsynonymous SNV | STXBPS:NM_139244:exon22:c.G2458A;p.G820S,STXBPS:NM_001127175:exon24:c.G2566A;p.G856S                                                                                                                                                                              | 1.404 | .        | 7.19E-05 | 2.09E-05 | Fam121_f_m_aF_aM    | 0/1;0/0;0/1;0/0     |                 |
| chr6 | 148747461 | 148747461 | G | C | UST      | exonic | nonsynonymous SNV | UST:NM_005715:exon1:c.G31C;p.G11R                                                                                                                                                                                                                                 | 1.004 | 0.0003   | 0.0003   | 0.0003   | Fam6_f_m_aM         | 0/1;0/0;0/1         |                 |
| chr6 | 149820601 | 149820601 | C | T | LRP11    | exonic | nonsynonymous SNV | LRP11:NM_032832:exon7:c.G1451A;p.R484H                                                                                                                                                                                                                            | 1.096 | .        | 0.0008   | 2.10E-05 | Fam5_f_m_aM         | 0/0;0/1;0/1         |                 |
| chr6 | 150214760 | 150214760 | A | G | PPP1R14C | exonic | nonsynonymous SNV | PPP1R14C:NM_030949:exon2:c.A323G;p.E108G                                                                                                                                                                                                                          | 1.724 | .        | 3.36E-05 | .        | Fam102_f_m_aM       | 0/0;0/1;0/1         |                 |
| chr6 | 154442133 | 154442133 | A | G | CNKSR3   | exonic | nonsynonymous SNV | CNKSR3:NM_001368116:exon3:c.T392C;p.V131A,CNKSR3:NM_001368117:exon3:c.T374C;p.V125A,CNKSR3:NM_001368118:exon3:c.T134C;p.V45A,CNKSR3:NM_173515:exon3:c.T374C;p.V125A                                                                                               | 1.012 | .        | .        | .        | Fam16_f_m_aM_aM     | 0/0;0/1;0/1;0/1     |                 |
| chr6 | 156829332 | 156829332 | T | C | ARID1B   | exonic | nonsynonymous SNV | ARID1B:NM_001346813:exon2:c.T1648C;p.Y550H,ARID1B:NM_017519:exon2:c.T1648C;p.Y550H,ARID1B:NM_020732:exon2:c.T1648C;p.Y550H                                                                                                                                        | 1.144 | .        | .        | 6.98E-06 | Fam73_f_m_aF_dM     | 0/0;0/1;0/1;0/0     |                 |
| chr6 | 158449062 | 158449062 | G | A | TULP4    | exonic | nonsynonymous SNV | TULP4:NM_001007466:exon4:c.G610A;p.V204I,TULP4:NM_020245:exon4:c.G610A;p.V204I                                                                                                                                                                                    | 1.04  | .        | 0.0001   | 9.77E-05 | Fam21_f_m_aM_uM     | 0/0;0/1;0/1;0/0     |                 |
| chr6 | 158771340 | 158771340 | T | C | EZR      | exonic | nonsynonymous SNV | EZR:NM_003379:exon8:c.A863G;p.H288R,EZR:NM_001111077:exon9:c.A863G;p.H288R                                                                                                                                                                                        | 1.163 | .        | .        | .        | Fam45_f_m_aM_uF     | 0/1;0/0;0/1;0/0     |                 |
| chr6 | 160738583 | 160738583 | G | C | PLG      | exonic | nonsynonymous SNV | PLG:NM_000301:exon15:c.G1848C;p.W616C                                                                                                                                                                                                                             | 1.026 | .        | 1.12E-05 | .        | Fam70_f_m_aM        | 0/0;0/1;0/1         |                 |
| chr6 | 165339323 | 165339323 | A | C | PDE10A   | exonic | nonsynonymous SNV | PDE10A:NM_001130690:exon20:c.T2133G;p.I711M,PDE10A:NM_006661:exon21:c.T2103G;p.I701M                                                                                                                                                                              | 1.666 | 0.0003   | 0.0006   | 0.0003   | Fam77_f_m_aM_aF     | 0/0;0/1;0/0;0/1     |                 |
| chr6 | 166366043 | 166366043 | A | T | MPC1     | exonic | nonsynonymous SNV | MPC1:NM_001270879:exon4:c.T107A;p.L36H                                                                                                                                                                                                                            | 1.44  | .        | .        | .        | Fam106_f_m_aM       | 0/0;0/1;0/1         |                 |
| chr6 | 166459457 | 166459457 | G | A | RPS6KA2  | exonic | nonsynonymous SNV | RPS6KA2:NM_001318937:exon10:c.C773T;p.T258M,RPS6KA2:NM_001318938:exon12:c.C800T;p.T267M,RPS6KA2:NM_021135:exon12:c.C1067T;p.T356M,RPS6KA2:NM_00106932:exon13:c.C1091T;p.T364M,RPS6KA2:NM_001318936:exon14:c.C1142T;p.T381M                                        | 1.349 | .        | 0.0004   | 5.58E-05 | Fam114_f_m_aM       | 0/0;0/1;0/1         |                 |
| chr6 | 167827175 | 167827175 | G | A | AFDN     | exonic | nonsynonymous SNV | AFDN:NM_001040000:exon1:c.G43A;p.D15N,AFDN:NM_001207008:exon1:c.G43A;p.D15N,AFDN:NM_001366319:exon1:c.G43A;p.D15N,AFDN:NM_001366320:exon1:c.G43A;p.D15N,AFDN:NM_001366321:exon1:c.G43A;p.D15N                                                                     | 1.519 | .        | .        | .        | Fam121_f_m_aF_aM    | 0/1;0/0;0/1;0/1     |                 |
| chr6 | 167951822 | 167951822 | C | G | AFDN     | exonic | nonsynonymous SNV | AFDN:NM_001207008:exon28:c.C4396G;p.P1466A,AFDN:NM_001040000:exon29:c.C4447G;p.P1483A,AFDN:NM_001291964:exon29:c.C4324G;p.P1442A,AFDN:NM_001366319:exon29:c.C4447G;p.P1483A,AFDN:NM_001366320:exon29:c.C4447G;p.P1483A,AFDN:NM_001366321:exon29:c.C4426G;p.P1476A | 1.071 | 0.0001   | 0.0001   | 0.0001   | Fam57_f_m_aM_uF     | 0/0;0/1;0/1;0/1     |                 |
| chr6 | 169225180 | 169225180 | C | T | THBS2    | exonic | nonsynonymous SNV | THBS2:NM_003247:exon18:c.G2738A;p.R913Q                                                                                                                                                                                                                           | 1.54  | 7.34E-05 | 0.0007   | 1.40E-05 | Fam116_f_m_aM_aF    | 0/1;0/0;0/1;0/1     |                 |
| chr6 | 169232110 | 169232110 | G | T | THBS2    | exonic | nonsynonymous SNV | THBS2:NM_003247:exon14:c.C2021A;p.P674H                                                                                                                                                                                                                           | 1.539 | .        | 1.12E-05 | .        | Fam21_f_m_aM_uM     | 0/1;0/0;0/1;0/0     |                 |
| chr6 | 169232901 | 169232901 | C | T | THBS2    | exonic | nonsynonymous SNV | THBS2:NM_003247:exon12:c.G1768A;p.D590N                                                                                                                                                                                                                           | 1.361 | 7.35E-05 | 0.0002   | 4.19E-05 | Fam1_f_m_aM         | 0/1;0/0;0/1         |                 |
| chr6 | 169248895 | 169248895 | T | G | THBS2    | exonic | nonsynonymous SNV | THBS2:NM_003247:exon4:c.A131C;p.Q44P                                                                                                                                                                                                                              | 1.567 | .        | .        | .        | Fam109_f_m_aM       | 0/0;0/1;0/1         |                 |
| chr6 | 169704062 | 169704062 | G | A | PHF10    | exonic | nonsynonymous SNV | PHF10:NM_018288:exon12:c.C1438T;p.R480W,PHF10:NM_133325:exon12:c.C1432T;p.R478W                                                                                                                                                                                   | 1.28  | 7.35E-05 | 0.0002   | 2.10E-05 | Fam36_f_m_aM_uM     | 0/1;0/0;0/1;0/0     |                 |

|      |          |          |   |   |           |        |                   |                                                                                                                                                                                                                                                                                                                                                                           |       |          |          |                     |                      |                     |
|------|----------|----------|---|---|-----------|--------|-------------------|---------------------------------------------------------------------------------------------------------------------------------------------------------------------------------------------------------------------------------------------------------------------------------------------------------------------------------------------------------------------------|-------|----------|----------|---------------------|----------------------|---------------------|
| chr7 | 256743   | 256743   | C | T | FAM20C    | exonic | nonsynonymous SNV | FAM20C:NM_020223:exon7:c.C1343T;p.T448M                                                                                                                                                                                                                                                                                                                                   | 1.1   | 0.0001   | 1.40E-05 | Fam62_f_m_aM_aM     | 0/1;0/0;0/1;0/1      |                     |
| chr7 | 2526264  | 2526264  | C | T | LFNG      | exonic | nonsynonymous SNV | LFNG:NM_001040167:exon6:c.C842T;p.T281M,LFNG:NM_001040168:exon6:c.C842T;p.T281M,LFNG:NM_001166355:exon7:c.C629T;p.T210M,LFNG:NM_002304:exon7:c.C455T;p.T152M                                                                                                                                                                                                              | 1.143 | 0.0002   | 1.40E-05 | Fam118_f_m_aM_aF_uM | 0/1;0/0;0/1;0/1;0/1  |                     |
| chr7 | 4740915  | 4740915  | C | T | FOXX1     | exonic | nonsynonymous SNV | FOXX1:NM_001037165:exon2:c.C638T;p.S213F                                                                                                                                                                                                                                                                                                                                  | 1.175 |          |          | Fam83_f_m_aF        | 0/1;0/0;0/1          |                     |
| chr7 | 5333004  | 5333004  | C | T | TNRC18    | exonic | nonsynonymous SNV | TNRC18:NM_001080495:exon19:c.G5765A;p.R1922H                                                                                                                                                                                                                                                                                                                              | 1.385 | 0.0005   | 0.0002   | 0.0002              | Fam119_f_m_aM_aM     | 0/1;0/0;0/0;0/1     |
| chr7 | 5388560  | 5388560  | G | A | TNRC18    | exonic | nonsynonymous SNV | TNRC18:NM_001080495:exon5:c.C1264T;p.R422W                                                                                                                                                                                                                                                                                                                                | 3.099 |          |          |                     | Fam33_f_m_aM_uM      | 0/1;0/0;0/1;0/1     |
| chr7 | 8071111  | 8071111  | T | G | GLCCI1    | exonic | nonsynonymous SNV | GLCCI1:NM_138426:exon6:c.T1157G;p.L386W                                                                                                                                                                                                                                                                                                                                   | 1.21  |          | 2.23E-05 |                     | Fam122_f_m_aM        | 0/1;0/0;0/1         |
| chr7 | 11028803 | 11028803 | G | T | PHF14     | exonic | nonsynonymous SNV | PHF14:NM_001007157:exon7:c.G1440T;p.E480D,PHF14:NM_014660:exon7:c.G1440T;p.E480D<br>SNX13:NM_001350862:exon7:c.G629A;p.R210H,SNX13:NM_001350863:exon7:c.G389A;p.R130H,SNX13:NM_001350868:exon7:c.G629A;p.R210H,SNX13:NM_015132:exon7:c.G629A;p.R210H,SNX13:NM_001350864:exon8:c.G323A;p.R108H,SNX13:NM_001350866:exon8:c.G20A;p.R7H,SNX13:NM_001350867:exon8:c.G20A;p.R7H | 1.291 |          |          |                     | Fam53_f_m_aM         | 0/0;0/1;0/1         |
| chr7 | 17875515 | 17875515 | C | T | SNX13     | exonic | nonsynonymous SNV | SNX13:NM_001350863:exon7:c.G389A;p.R130H,SNX13:NM_001350868:exon7:c.G629A;p.R210H,SNX13:NM_015132:exon7:c.G629A;p.R210H,SNX13:NM_001350864:exon8:c.G323A;p.R108H,SNX13:NM_001350866:exon8:c.G20A;p.R7H,SNX13:NM_001350867:exon8:c.G20A;p.R7H                                                                                                                              | 1.34  | 7.41E-05 | 6.75E-05 | 3.59E-05            | Fam31_f_m_aM_uF      | 0/1;0/0;0/1;0/0     |
| chr7 | 27094495 | 27094495 | G | A | HOXA1     | exonic | nonsynonymous SNV | HOXA1:NM_005522:exon2:c.C953T;p.P318L                                                                                                                                                                                                                                                                                                                                     | 1.034 |          | 6.17E-05 | 2.09E-05            | Fam68_f_m_aF_uF_uM   | 0/1;0/0;0/1;0/1;0/0 |
| chr7 | 27094626 | 27094626 | C | G | HOXA1     | exonic | nonsynonymous SNV | HOXA1:NM_005522:exon2:c.G822C;p.K274N                                                                                                                                                                                                                                                                                                                                     | 1.237 |          | 5.58E-05 | 3.49E-05            | Fam59_f_m_aF_uM      | 0/0;0/1;0/1;0/0     |
| chr7 | 27102220 | 27102220 | T | C | HOXA2     | exonic | nonsynonymous SNV | HOXA2:NM_006735:exon1:c.A281G;p.E94G                                                                                                                                                                                                                                                                                                                                      | 1.194 |          | 6.14E-05 | 2.80E-05            | Fam118_f_m_aM_aF_uM  | 0/1;0/0;0/1;0/0;0/0 |
| chr7 | 27182812 | 27182812 | G | A | HOXA11    | exonic | nonsynonymous SNV | HOXA11:NM_005523:exon2:c.C926T;p.A309V                                                                                                                                                                                                                                                                                                                                    | 1.142 |          | 3.28E-05 | 6.28E-05            | Fam56_f_m_aF_aM      | 0/1;0/0;0/1;0/0     |
| chr7 | 27245957 | 27245957 | C | A | EVX1      | exonic | nonsynonymous SNV | EVX1:NM_001304519:exon3:c.C210A;p.D70E,EVX1:NM_001989:exon3:c.C756A;p.D252E,EVX1:NM_001304520:exon4:c.C210A;p.D70E                                                                                                                                                                                                                                                        | 1.025 | 0.0002   | 0.0004   | 0.0004              | Fam34_f_m_aM_uF      | 0/0;0/1;0/1;0/1     |
| chr7 | 27245957 | 27245957 | C | A | EVX1      | exonic | nonsynonymous SNV | EVX1:NM_001304519:exon3:c.C210A;p.D70E,EVX1:NM_001989:exon3:c.C756A;p.D252E,EVX1:NM_001304520:exon4:c.C210A;p.D70E                                                                                                                                                                                                                                                        | 1.025 | 0.0002   | 0.0004   | 0.0004              | Fam114_f_m_aM        | 0/1;0/0;0/1         |
| chr7 | 29566541 | 29566541 | C | A | PRR15     | exonic | nonsynonymous SNV | PRR15:NM_001329996:exon2:c.C212A;p.P71H,PRR15:NM_001329997:exon2:c.C212A;p.P71H,PRR15:NM_175887:exon2:c.C212A;p.P71H                                                                                                                                                                                                                                                      | 1.111 | 0.0001   | 0.0003   | 0.0002              | Fam115_f_m_aF_aM_aF  | 0/1;0/0;0/0;0/1;0/1 |
| chr7 | 29566541 | 29566541 | C | A | PRR15     | exonic | nonsynonymous SNV | PRR15:NM_001329996:exon2:c.C212A;p.P71H,PRR15:NM_001329997:exon2:c.C212A;p.P71H,PRR15:NM_175887:exon2:c.C212A;p.P71H                                                                                                                                                                                                                                                      | 1.111 | 0.0001   | 0.0003   | 0.0002              | Fam92_f_m_aM_raM     | 0/1;0/0;0/1;0/0     |
| chr7 | 30055308 | 30055308 | C | G | PLEKHA8   | exonic | nonsynonymous SNV | PLEKHA8:NM_001363474:exon8:c.C498G;p.F166L,PLEKHA8:NM_001197026:exon9:c.C1005G;p.F335L,PLEKHA8:NM_001197027:exon9:c.C1005G;p.F335L,PLEKHA8:NM_001350973:exon9:c.C1005G;p.F335L,PLEKHA8:NM_001350974:exon9:c.C1005G;p.F335L,PLEKHA8:NM_001350975:exon9:c.C408G;p.F136L,PLEKHA8:NM_001363473:exon9:c.C1005G;p.F335L,PLEKHA8:NM_032639:exon9:c.C1005G;p.F335L                | 1.098 |          |          |                     | Fam63_f_m_aF         | 0/1;0/0;0/1         |
| chr7 | 30612120 | 30612120 | G | C | GARS      | exonic | nonsynonymous SNV | GARS:NM_001316772:exon8:c.G744C;p.Q248H,GARS:NM_002047:exon8:c.G906C;p.Q302H                                                                                                                                                                                                                                                                                              | 1.087 |          | 1.12E-05 |                     | Fam113_f_m_aF_raM_uF | 0/0;0/1;0/1;0/0;0/1 |
| chr7 | 30617153 | 30617153 | C | T | GARS      | exonic | nonsynonymous SNV | GARS:NM_001316772:exon10:c.C1072T;p.R358C,GARS:NM_002047:exon10:c.C1234T;p.R412C                                                                                                                                                                                                                                                                                          | 1.317 |          | 3.37E-05 | 1.40E-05            | Fam82_f_m_aM_uF      | 0/0;0/1;0/1;0/0     |
| chr7 | 30665180 | 30665180 | G | A | CRHR2     | exonic | nonsynonymous SNV | CRHR2:NM_001202482:exon5:c.C430T;p.R144C,CRHR2:NM_001202483:exon5:c.C433T;p.R145C,CRHR2:NM_001883:exon5:c.C433T;p.R145C,CRHR2:NM_001202475:exon6:c.C5147;p.R172C,CRHR2:NM_001202481:exon7:c.C391T;p.R131C                                                                                                                                                                 | 1.011 | 0.0006   | 0.0001   | 6.98E-06            | Fam120_f_m_aM_aM     | 0/0;0/1;0/1;0/1     |
| chr7 | 31084827 | 31084827 | C | T | ADCYAP1R1 | exonic | nonsynonymous SNV | ADCYAP1R1:NM_001199637:exon6:c.C466T;p.R156C,ADCYAP1R1:NM_001118:exon8:c.C529T;p.R177C,ADCYAP1R1:NM_001199635:exon8:c.C529T;p.R177C,ADCYAP1R1:NM_001199636:exon8:c.C529T;p.R177C                                                                                                                                                                                          | 1.128 | 0.0006   | 0.0002   | 1.40E-05            | Fam46_f_m_aM_uM      | 0/1;0/0;0/1;0/0     |
| chr7 | 31338318 | 31338318 | G | C | NEUROD6   | exonic | nonsynonymous SNV | NEUROD6:NM_022728:exon2:c.C951G;p.D317E                                                                                                                                                                                                                                                                                                                                   | 1.311 |          |          |                     | Fam87_f_m_aM_uM      | 0/0;0/1;0/1;0/0     |
| chr7 | 31339267 | 31339267 | A | G | NEUROD6   | exonic | startloss         | NEUROD6:NM_022728:exon2:c.T2C;p.M1?                                                                                                                                                                                                                                                                                                                                       | 0.413 |          |          |                     | Fam5_f_m_aM          | 0/0;0/1;0/1         |
| chr7 | 37916424 | 37916424 | G | T | SFRP4     | exonic | nonsynonymous SNV | SFRP4:NM_003014:exon1:c.C114A;p.N38K                                                                                                                                                                                                                                                                                                                                      | 1.268 |          |          |                     | Fam49_f_m_aM         | 0/0;0/1;0/1         |
| chr7 | 38207719 | 38207719 | T | C | STARD3NL  | exonic | nonsynonymous SNV | STARD3NL:NM_001363345:exon2:c.T215C;p.I72T,STARD3NL:NM_032016:exon2:c.T215C;p.I72T,STARD3NL:NM_001363339:exon3:c.T215C;p.I72T,STARD3NL:NM_001363340:exon3:c.T215C;p.I72T,STARD3NL:NM_001363343:exon3:c.T215C;p.I72T,STARD3NL:NM_001363344:exon3:c.T215C;p.I72T,STARD3NL:NM_001363347:exon3:c.T215C;p.I72T,STARD3NL:NM_001363346:exon4:c.T215C;p.I72T                      | 1.16  |          |          |                     | Fam33_f_m_aM_uM      | 0/0;0/1;0/1;0/1     |
| chr7 | 39950657 | 39950657 | G | A | CDK13     | exonic | nonsynonymous SNV | CDK13:NM_003718:exon1:c.G16A;p.D6N,CDK13:NM_003127:exon1:c.G16A;p.D6N                                                                                                                                                                                                                                                                                                     | 1.702 |          |          |                     | Fam44_f_m_aM_uF      | 0/1;0/0;0/1;0/0     |
| chr7 | 41689931 | 41689931 | C | T | INHBA     | exonic | nonsynonymous SNV | INHBA:NM_002192:exon3:c.G1000A;p.G334S                                                                                                                                                                                                                                                                                                                                    | 1.775 | 7.35E-05 | 0.0003   | 0.0001              | Fam94_f_m_aM         | 0/1;0/0;0/1         |
| chr7 | 41977590 | 41977590 | C | T | GLI3      | exonic | nonsynonymous SNV | GLI3:NM_000168:exon12:c.G1780A;p.A594T                                                                                                                                                                                                                                                                                                                                    | 2.089 |          |          |                     | Fam12_f_m_aM_uM_aM   | 0/0;0/1;0/1;0/0;0/0 |
| chr7 | 43877109 | 43877109 | G | A | URGCP     | exonic | nonsynonymous SNV | URGCP:NM_017920:exon5:c.C2327T;p.T776I,URGCP:NM_01077663:exon6:c.C2354T;p.T785I,URGCP:NM_001077664:exon6:c.C2225T;p.T742I,URGCP:NM_001290075:exon6:c.C2225T;p.T742I,URGCP:NM_001290076:exon7:c.C2225T;p.T742I                                                                                                                                                             | 1.078 | 0.0004   | 0.0005   | 0.0004              | Fam39_f_m_aM         | 0/1;0/0;0/1         |
| chr7 | 44153367 | 44153367 | C | T | GCK       | exonic | nonsynonymous SNV | GCK:NM_000162:exon2:c.G142A;p.E48K,GCK:NM_001354800:exon2:c.G142A;p.E48K,GCK:NM_033507:exon2:c.G145A;p.E49K,GCK:NM_033508:exon3:c.G139A;p.E47K                                                                                                                                                                                                                            | 1.863 |          | 5.59E-05 |                     | Fam92_f_m_aM_raM     | 0/0;0/1;0/1;0/0     |

|      |           |           |   |   |         |        |                     |                                                                                                                                                                                                                                                                                                           |       |          |          |          |                     |                     |
|------|-----------|-----------|---|---|---------|--------|---------------------|-----------------------------------------------------------------------------------------------------------------------------------------------------------------------------------------------------------------------------------------------------------------------------------------------------------|-------|----------|----------|----------|---------------------|---------------------|
| chr7 | 44206388  | 44206388  | A | G | YKT6    | exonic | nonsynonymous SNV   | YKT6:NM_001363678:exon3:c.A191G:p.Y64C,YKT6:NM_006555:exon3:c.A191G:p.Y64C                                                                                                                                                                                                                                | 1.123 | 0.0007   | 0.0008   | 0.0007   | Fam39_f_m_aM        | 0/1;0/0;0/1         |
| chr7 | 44697682  | 44697682  | C | T | OGDH    | exonic | nonsynonymous SNV   | OGDH:NM_001165036:exon17:c.C2246T:p.T749M,OGDH:NM_002541:exon17:c.C2258T:p.T753M,OGDH:NM_001363523:exon18:c.C2291T:p.T764M                                                                                                                                                                                | 1.161 |          | 2.23E-05 |          | Fam12_f_m_aM_uM_aM  | 0/0;0/1;0/1;0/0;0/0 |
| chr7 | 44969833  | 44969833  | G | A | MYO1G   | exonic | nonsynonymous SNV   | MYO1G:NM_033054:exon11:c.C1375T:p.R459W                                                                                                                                                                                                                                                                   | 1.083 | 0.0004   | 0.0003   | 0.0002   | Fam27_f_m_aF_uM_uM  | 0/0;0/1;0/1;0/1;0/1 |
| chr7 | 44976893  | 44976893  | G | A | MYO1G   | exonic | nonsynonymous SNV   | MYO1G:NM_033054:exon2:c.C274T:p.R92W                                                                                                                                                                                                                                                                      | 1.083 |          | 0.0001   | 3.49E-05 | Fam14_f_m_aM_aM     | 0/0;0/1;0/1;0/1     |
| chr7 | 45678049  | 45678049  | G | A | ADCY1   | exonic | nonsynonymous SNV   | ADCY1:NM_021116:exon9:c.G1786A:p.E596K                                                                                                                                                                                                                                                                    | 1.412 | 0.0004   | 0.0005   | 0.0002   | Fam10_f_m_aM_uF     | 0/0;0/1;0/1;0/1     |
| chr7 | 45678049  | 45678049  | G | A | ADCY1   | exonic | nonsynonymous SNV   | ADCY1:NM_021116:exon9:c.G1786A:p.E596K                                                                                                                                                                                                                                                                    | 1.412 | 0.0004   | 0.0005   | 0.0002   | Fam11_f_m_aM_uM     | 0/1;0/0;0/1;0/1     |
| chr7 | 45917251  | 45917251  | G | C | IGFBP3  | exonic | nonsynonymous SNV   | IGFBP3:NM_000598:exon2:c.C592G:p.Q198E,IGFBP3:NM_001013398:exon2:c.C610G:p.Q204E                                                                                                                                                                                                                          | 1.014 | 7.35E-05 | 0.0009   | 0.0001   | Fam119_f_m_aM_aM    | 0/1;0/0;0/0;0/1     |
| chr7 | 55173940  | 55173940  | C | G | EGFR    | exonic | nonsynonymous SNV   | EGFR:NM_001346941:exon12:c.C1280G:p.P427R,EGFR:NM_001346897:exon17:c.C1946G:p.P649R,EGFR:NM_001346899:exon17:c.C1946G:p.P649R,EGFR:NM_001346898:exon18:c.C2081G:p.P694R,EGFR:NM_001346900:exon18:c.C1922G:p.P641R,EGFR:NM_005228:exon18:c.C2081G:p.P694R                                                  | 1.496 |          |          |          | Fam14_f_m_aM_aM     | 0/1;0/0;0/1;0/1     |
| chr7 | 55192804  | 55192804  | C | G | EGFR    | exonic | nonsynonymous SNV   | EGFR:NM_001346941:exon16:c.C1863G:p.H621Q,EGFR:NM_001346897:exon21:c.C2529G:p.H843Q,EGFR:NM_001346899:exon21:c.C2529G:p.H843Q,EGFR:NM_001346898:exon22:c.C2664G:p.H888Q,EGFR:NM_001346900:exon22:c.C2505G:p.H835Q,EGFR:NM_005228:exon22:c.C2664G:p.H888Q                                                  | 1.433 |          | 1.12E-05 |          | Fam6_f_m_aM         | 0/1;0/0;0/1         |
| chr7 | 57126044  | 57126044  | C | A | ZNF479  | exonic | nonsynonymous SNV   | ZNF479:NM_001370129:exon3:c.G236T:p.R79I,ZNF479:NM_033273:exon4:c.G236T:p.R79I                                                                                                                                                                                                                            | 2.349 | 0.0006   |          | 0.0002   | Fam118_f_m_aM_aF_uM | 0/0;0/0;0/0;0/1;0/1 |
| chr7 | 65967873  | 65967873  | T | C | GUSB    | exonic | nonsynonymous SNV   | GUSB:NM_001284290:exon8:c.A1073G:p.Y358C,GUSB:NM_001293105:exon8:c.A854G:p.Y285C,GUSB:NM_001293104:exon9:c.A941G:p.Y314C,GUSB:NM_000181:exon10:c.A1511G:p.Y504C                                                                                                                                           | 1.365 |          | 3.27E-05 |          | Fam14_f_m_aM_aM     | 0/1;0/0;0/1;0/1     |
| chr7 | 73616133  | 73616133  | T | C | MLXIPL  | exonic | nonsynonymous SNV   | MLXIPL:NM_032951:exon2:c.A338G:p.K113R,MLXIPL:NM_032952:exon2:c.A338G:p.K113R,MLXIPL:NM_032953:exon2:c.A338G:p.K113R,MLXIPL:NM_032954:exon2:c.A338G:p.K113R                                                                                                                                               | 1.572 | 0.0003   | 8.93E-05 | 7.68E-05 | Fam15_f_m_aM_aM     | 0/0;0/1;0/1;0/1     |
| chr7 | 73670082  | 73670082  | G | A | VPS37D  | exonic | nonsynonymous SNV   | VPS37D:NM_001077621:exon3:c.G373A:p.E125K                                                                                                                                                                                                                                                                 | 1.025 |          | 4.06E-05 |          | Fam4_f_m_aM         | 0/1;0/0;0/1         |
| chr7 | 74252487  | 74252487  | T | C | RFC2    | exonic | nonsynonymous SNV   | RFC2:NM_002914:exon2:c.A125G:p.Y42C,RFC2:NM_181471:exon2:c.A125G:p.Y42C                                                                                                                                                                                                                                   | 1.608 |          |          |          | Fam88_f_m_aF        | 0/0;0/1;0/1         |
| chr7 | 74357317  | 74357317  | C | T | CLIP2   | exonic | nonsynonymous SNV   | CLIP2:NM_003388:exon6:c.C1055T:p.S352L,CLIP2:NM_032421:exon6:c.C1055T:p.S352L                                                                                                                                                                                                                             | 1.55  |          |          |          | Fam92_f_m_aM_raM    | 0/1;0/0;0/1;0/1     |
| chr7 | 75563244  | 75563244  | G | A | HIP1    | exonic | nonsynonymous SNV   | HIP1:NM_001243198:exon10:c.C823T:p.R275C,HIP1:NM_05338:exon10:c.C823T:p.R275C                                                                                                                                                                                                                             | 1.254 |          | 1.12E-05 | 1.40E-05 | Fam7_f_m_aM_aM_uM   | 0/0;0/1;0/1;0/0;0/0 |
| chr7 | 76329846  | 76329846  | C | T | YWHAG   | exonic | nonsynonymous SNV   | YWHAG:NM_012479:exon2:c.G475A:p.E159K                                                                                                                                                                                                                                                                     | 1.554 |          | 1.12E-05 | 6.99E-06 | Fam117_f_m_aM_aF    | 0/0;0/1;0/1;0/1     |
| chr7 | 77949692  | 77949692  | C | G | PHTF2   | exonic | nonsynonymous SNV   | PHTF2:NM_001366084:exon14:c.C1728G:p.H576Q,PHTF2:NM_001366087:exon14:c.C1728G:p.H576Q,PHTF2:NM_020432:exon14:c.C1860G:p.H620Q,PHTF2:NM_001127357:exon15:c.C1872G:p.H624Q,PHTF2:NM_001127358:exon15:c.C1860G:p.H620Q,PHTF2:NM_001366086:exon15:c.C1860G:p.H620Q,PHTF2:NM_001366089:exon16:c.C1974G:p.H658Q | 1.899 |          | 7.95E-05 | 6.98E-06 | Fam60_f_m_aF        | 0/0;0/1;0/1         |
| chr7 | 78521574  | 78521574  | G | C | MAGI2   | exonic | nonsynonymous SNV   | MAGI2:NM_001301128:exon4:c.C610G:p.L204V,MAGI2:NM_012301:exon4:c.C610G:p.L204V                                                                                                                                                                                                                            | 1.134 |          |          |          | Fam84_f_m_aF        | 0/1;0/0;0/1         |
| chr7 | 87173600  | 87173600  | C | - | DMTF1   | exonic | frameshift deletion | DMTF1:NM_001142326:exon5:c.129delC:p.Q44Kfs*13,DMTF1:NM_001142327:exon6:c.393delC:p.Q132Kfs*13,DMTF1:NM_021145:exon8:c.393delC:p.Q132Kfs*13                                                                                                                                                               | 0.54  |          |          |          | Fam29_f_m_aF_uM     | 0/1;0/0;0/1;0/0     |
| chr7 | 87406437  | 87406437  | C | T | ABCB4   | exonic | nonsynonymous SNV   | ABCB4:NM_018850:exon25:c.G3196A:p.G1066R,ABCB4:NM_000443:exon26:c.G3337A:p.G1113R,ABCB4:NM_018849:exon26:c.G3358A:p.G1120R                                                                                                                                                                                | 1.052 |          |          | 6.99E-06 | Fam56_f_m_aF_aM     | 0/0;0/1;0/0;0/1     |
| chr7 | 87453110  | 87453110  | C | G | ABCB4   | exonic | nonsynonymous SNV   | ABCB4:NM_000443:exon6:c.G370C:p.G124R,ABCB4:NM_018849:exon6:c.G370C:p.G124R,ABCB4:NM_018850:exon6:c.G370C:p.G124R                                                                                                                                                                                         | 1.051 |          |          |          | Fam95_f_m_aM_aM_uF  | 0/1;0/0;0/1;0/1;0/0 |
| chr7 | 92615159  | 92615159  | G | A | CDK6    | exonic | nonsynonymous SNV   | CDK6:NM_001145306:exon8:c.C962T:p.S321L,CDK6:NM_01259:exon8:c.C962T:p.S321L                                                                                                                                                                                                                               | 1.025 |          | 6.54E-05 | 6.98E-06 | Fam44_f_m_aM_uF     | 0/0;0/1;0/1;0/0     |
| chr7 | 96080462  | 96080462  | C | T | DYNC111 | exonic | nonsynonymous SNV   | DYNC111:NM_001135557:exon15:c.C1690T:p.R564C,DYNC111:NM_001278421:exon15:c.C1741T:p.R581C,DYNC111:NM_001278422:exon15:c.C1690T:p.R564C,DYNC111:NM_01135556:exon16:c.C1750T:p.R584C,DYNC111:NM_004411:exon16:c.C1801T:p.R601C                                                                              | 1.657 | 7.35E-05 | 3.27E-05 | 1.40E-05 | Fam88_f_m_aF        | 0/0;0/1;0/1         |
| chr7 | 97022189  | 97022189  | G | A | DLX5    | exonic | nonsynonymous SNV   | DLX5:NM_005221:exon2:c.C536T:p.T179I                                                                                                                                                                                                                                                                      | 1.011 | 0.0003   | 6.70E-05 | 5.58E-05 | Fam18_f_m_aM_uF     | 0/1;0/0;0/1;0/1     |
| chr7 | 98950182  | 98950182  | A | T | TRRAP   | exonic | nonsynonymous SNV   | TRRAP:NM_003496:exon36:c.A5179T:p.S1727C,TRRAP:NM_001244580:exon37:c.A5233T:p.S1745C                                                                                                                                                                                                                      | 1.397 |          |          |          | Fam119_f_m_aM_aM    | 0/0;0/1;0/0;0/1     |
| chr7 | 99353989  | 99353989  | T | C | ARPC1A  | exonic | nonsynonymous SNV   | ARPC1A:NM_001190996:exon6:c.T539C:p.L180P,ARPC1A:NM_006409:exon6:c.T581C:p.L194P                                                                                                                                                                                                                          | 1.312 | 0.0004   | 0.0006   | 0.0003   | Fam79_f_m_aM_uM     | 0/0;0/1;0/1;0/0     |
| chr7 | 100430188 | 100430188 | C | T | MEPCE   | exonic | nonsynonymous SNV   | MEPCE:NM_019606:exon1:c.C170T:p.S57F                                                                                                                                                                                                                                                                      | 1.345 | 7.40E-05 |          | 6.98E-06 | Fam102_f_m_aM       | 0/0;0/1;0/1         |
| chr7 | 100823775 | 100823775 | T | C | EPHB4   | exonic | nonsynonymous SNV   | EPHB4:NM_004444:exon3:c.A280G:p.M94V                                                                                                                                                                                                                                                                      | 1.372 | 7.35E-05 | 1.14E-05 | 6.98E-06 | Fam69_f_m_aM        | 0/0;0/1;0/1         |
| chr7 | 101088304 | 101088304 | G | A | TRIM56  | exonic | nonsynonymous SNV   | TRIM56:NM_030961:exon3:c.G992A:p.R331Q                                                                                                                                                                                                                                                                    | 1.551 |          | 1.63E-05 | 6.98E-06 | Fam32_f_m_aM_uM     | 0/1;0/0;0/1;0/1     |
| chr7 | 105624241 | 105624241 | C | A | ATXN7L1 | exonic | nonsynonymous SNV   | ATXN7L1:NM_138495:exon6:c.G857T:p.S286I,ATXN7L1:NM_001318229:exon8:c.G581T:p.S194I,ATXN7L1:NM_020725:exon8:c.G1229T:p.S410I                                                                                                                                                                               | 1.314 |          | 6.14E-05 | 6.98E-06 | Fam18_f_m_aM_uF     | 0/1;0/0;0/1;0/1     |
| chr7 | 107475262 | 107475262 | T | C | GPR22   | exonic | nonsynonymous SNV   | GPR22:NM_005295:exon3:c.T1202C:p.I401T                                                                                                                                                                                                                                                                    | 1.02  | 7.36E-05 | 4.50E-05 | 2.10E-05 | Fam91_m_aM_dM_aM_dM | 0/1;0/0;0/1;0/1;0/0 |

|      |           |           |      |   |         |          |                     |                                                                                                                                                                                                                                                                                                                                                                                                                                                                                                                                                   |       |  |          |          |                              |                     |
|------|-----------|-----------|------|---|---------|----------|---------------------|---------------------------------------------------------------------------------------------------------------------------------------------------------------------------------------------------------------------------------------------------------------------------------------------------------------------------------------------------------------------------------------------------------------------------------------------------------------------------------------------------------------------------------------------------|-------|--|----------|----------|------------------------------|---------------------|
| chr7 | 111977210 | 111977210 | C    | G | DOCK4   | exonic   | nonsynonymous SNV   | DOCK4:NM_001363540:exon8:c.G623C;p.S208T,DOCK4:NM_014705:exon8:c.G623C;p.S208T                                                                                                                                                                                                                                                                                                                                                                                                                                                                    | 1.09  |  |          |          | Fam36_f_m_aM_uM              | 0/0;0/1;0/1;0/0     |
| chr7 | 120275635 | 120275635 | A    | G | KCND2   | exonic   | nonsynonymous SNV   | KCND2:NM_012281:exon1:c.A1003G;p.I335V                                                                                                                                                                                                                                                                                                                                                                                                                                                                                                            | 2.311 |  |          |          | Fam20_f_m_aM_uF              | 0/0;0/1;0/1;0/0     |
| chr7 | 122886121 | 122886121 | G    | A | CADPS2  | exonic   | nonsynonymous SNV   | CADPS2:NM_001009571:exon1:c.C217T;p.R73W,CADPS2:NM_001167940:exon1:c.C217T;p.R73W,CADPS2:NM_001363389:exon1:c.C217T;p.R73W,CADPS2:NM_001363390:exon1:c.C217T;p.R73W,CADPS2:NM_001363391:exon1:c.C217T;p.R73W,CADPS2:NM_001363392:exon1:c.C217T;p.R73W,CADPS2:NM_001363393:exon1:c.C217T;p.R73W,CADPS2:NM_001363394:exon1:c.C217T;p.R73W,CADPS2:NM_001363395:exon1:c.C217T;p.R73W,CADPS2:NM_001363396:exon1:c.C217T;p.R73W,CADPS2:NM_001363397:exon1:c.C217T;p.R73W,CADPS2:NM_001363398:exon1:c.C217T;p.R73W,CADPS2:NM_017954:exon1:c.C217T;p.R73W | 1.103 |  | 8.58E-05 |          | Fam116_f_m_aM_aF             | 0/0;0/1;0/0;0/1     |
| chr7 | 128030912 | 128030912 | C    | T | LRRC4   | splicing | .                   | .                                                                                                                                                                                                                                                                                                                                                                                                                                                                                                                                                 | 0.459 |  |          |          | 6.98E-06 Fam22_f_m_aF_aF_uF  | 0/1;0/0;0/1;0/1;0/1 |
| chr7 | 128830777 | 128830777 | A    | G | FLNC    | exonic   | nonsynonymous SNV   | FLNC:NM_001127487:exon1:c.A140G;p.N475,FLNC:NM_001458:exon1:c.A140G;p.N475                                                                                                                                                                                                                                                                                                                                                                                                                                                                        | 1.273 |  | 7.35E-05 | 5.67E-05 | 4.19E-05 Fam99_f_m_aM_aM     | 0/0;0/1;0/0;0/1     |
| chr7 | 128851458 | 128851458 | G    | C | FLNC    | exonic   | nonsynonymous SNV   | FLNC:NM_001127487:exon34:c.G5573C;p.G1858A,FLNC:NM_001458:exon35:c.G5672C;p.G1891A                                                                                                                                                                                                                                                                                                                                                                                                                                                                | 1.804 |  |          |          | Fam33_f_m_aM_uM              | 0/0;0/1;0/1;0/0     |
| chr7 | 128947996 | 128947999 | CCAT | - | IRF5    | exonic   | frameshift deletion | IRF5:NM_001242452:exon6:c.749_752del:p.I251Afs*84,IRF5:NM_001098627:exon7:c.1007_1010del:p.I337Afs*84,IRF5:NM_001098629:exon7:c.1055_1058del:p.I353Afs*84,IRF5:NM_001098630:exon7:c.1007_1010del:p.I337Afs*84,IRF5:NM_001347928:exon7:c.1055_1058del:p.I353Afs*84,IRF5:NM_001364314:exon7:c.1055_1058del:p.I353Afs*84,IRF5:NM_032643:exon7:c.1007_1010del:p.I337Afs*84                                                                                                                                                                            | 0.537 |  |          |          | Fam53_f_m_aM                 | 0/1;0/0;0/1         |
| chr7 | 129205369 | 129205369 | C    | T | SMO     | exonic   | nonsynonymous SNV   | SMO:NM_005631:exon3:c.C704T;p.A235V                                                                                                                                                                                                                                                                                                                                                                                                                                                                                                               | 1.009 |  | 7.35E-05 | 0.0003   | 0.0001 Fam25_f_m_aM          | 0/1;0/0;0/1         |
| chr7 | 129205782 | 129205782 | C    | T | SMO     | exonic   | nonsynonymous SNV   | SMO:NM_005631:exon4:c.C920T;p.T3071                                                                                                                                                                                                                                                                                                                                                                                                                                                                                                               | 1.13  |  | 7.35E-05 | 8.95E-05 | 6.29E-05 Fam28_f_m_aF_uF     | 0/0;0/1;0/1;0/0     |
| chr7 | 132174797 | 132174797 | G    | A | PLXNA4  | exonic   | nonsynonymous SNV   | PLXNA4:NM_020911:exon21:c.C3998T;p.P1333L                                                                                                                                                                                                                                                                                                                                                                                                                                                                                                         | 1.578 |  |          |          | Fam101_f_m_aM                | 0/1;0/0;0/1         |
| chr7 | 132211112 | 132211112 | A    | T | PLXNA4  | exonic   | nonsynonymous SNV   | PLXNA4:NM_020911:exon10:c.T2129A;p.I710N                                                                                                                                                                                                                                                                                                                                                                                                                                                                                                          | 2.031 |  | 7.35E-05 | 1.67E-05 | 1.40E-05 Fam115_f_m_aF_aM_aF | 0/1;0/0;0/1;0/0;0/0 |
| chr7 | 132507891 | 132507891 | C    | A | PLXNA4  | exonic   | nonsynonymous SNV   | PLXNA4:NM_001105543:exon2:c.G803T;p.G268V,PLXNA4:NM_020911:exon2:c.G803T;p.G268V,PLXNA4:NM_181775:exon3:c.G803T;p.G268V                                                                                                                                                                                                                                                                                                                                                                                                                           | 1.685 |  |          | 6.56E-05 | 1.40E-05 Fam109_f_m_aM       | 0/0;0/1;0/1         |
| chr7 | 134891621 | 134891621 | A    | G | CALD1   | exonic   | startloss           | CALD1:NM_033139:exon1:c.A1G;p.M1?,CALD1:NM_033140:exon1:c.A1G;p.M1?                                                                                                                                                                                                                                                                                                                                                                                                                                                                               | 0.498 |  |          | 3.39E-05 | Fam14_f_m_aM_aM              | 0/0;0/1;0/0;0/1     |
| chr7 | 138460570 | 138460570 | G    | C | TRIM24  | exonic   | nonsynonymous SNV   | TRIM24:NM_003852:exon1:c.G22C;p.A8P,TRIM24:NM_015905:exon1:c.G22C;p.A8P                                                                                                                                                                                                                                                                                                                                                                                                                                                                           | 1.934 |  |          |          | Fam113_f_m_aF_raM_uF         | 0/0;0/0;0/0;0/1;0/0 |
| chr7 | 139109084 | 139109084 | T    | C | ZC3HAV1 | exonic   | nonsynonymous SNV   | ZC3HAV1:NM_001363491:exon1:c.A248G;p.D83G,ZC3HAV1:NM_020119:exon1:c.A248G;p.D83G,ZC3HAV1:NM_024625:exon1:c.A248G;p.D83G                                                                                                                                                                                                                                                                                                                                                                                                                           | 2.21  |  |          | 0.0002   | 4.19E-05 Fam43_f_m_aM        | 0/0;0/1;0/1         |
| chr7 | 143268091 | 143268091 | G    | A | GSTK1   | exonic   | nonsynonymous SNV   | GSTK1:NM_001143679:exon6:c.G706A;p.A236T,GSTK1:NM_001143680:exon6:c.G502A;p.A168T,GSTK1:NM_001143681:exon6:c.G409A;p.A137T,GSTK1:NM_015917:exon7:c.G538A;p.A180T                                                                                                                                                                                                                                                                                                                                                                                  | 1.024 |  | 7.34E-05 | 3.37E-05 | 1.40E-05 Fam84_f_m_aF        | 0/0;0/1;0/1         |
| chr7 | 143300046 | 143300046 | C    | T | CASP2   | exonic   | nonsynonymous SNV   | CASP2:NM_001224:exon7:c.C778T;p.L260F,CASP2:NM_032982:exon7:c.C871T;p.L291F                                                                                                                                                                                                                                                                                                                                                                                                                                                                       | 1.225 |  |          | 4.47E-05 | 6.98E-06 Fam54_f_m_aM_uF     | 0/1;0/0;0/1;0/1     |
| chr7 | 143304745 | 143304745 | C    | T | CASP2   | exonic   | nonsynonymous SNV   | CASP2:NM_032982:exon10:c.C1189T;p.R397W                                                                                                                                                                                                                                                                                                                                                                                                                                                                                                           | 1.105 |  |          | 2.23E-05 | 6.98E-06 Fam62_f_m_aM_aM     | 0/1;0/0;0/1;0/0     |
| chr7 | 149179548 | 149179548 | G    | A | ZNF398  | exonic   | nonsynonymous SNV   | ZNF398:NM_170686:exon6:c.G1676A;p.R559H,ZNF398:NM_020781:exon7:c.G1163A;p.R388H                                                                                                                                                                                                                                                                                                                                                                                                                                                                   | 1.138 |  |          |          | 6.98E-06 Fam61_f_m_aM        | 0/0;0/1;0/1         |
| chr7 | 150720500 | 150720500 | G    | A | GIMAP1  | exonic   | nonsynonymous SNV   | GIMAP1:NM_130759:exon3:c.G496A;p.V166M                                                                                                                                                                                                                                                                                                                                                                                                                                                                                                            | 1.576 |  |          | 0.0001   | 2.79E-05 Fam15_f_m_aM_aM     | 0/1;0/0;0/1;0/1     |
| chr7 | 150952640 | 150952640 | C    | T | KCNH2   | exonic   | nonsynonymous SNV   | KCNH2:NM_001204798:exon2:c.G322A;p.A108T,KCNH2:NM_172057:exon2:c.G322A;p.A108T,KCNH2:NM_000238:exon6:c.G1342A;p.A448T,KCNH2:NM_172056:exon6:c.G1342A;p.A448T                                                                                                                                                                                                                                                                                                                                                                                      | 1.248 |  |          |          | 6.98E-06 Fam47_f_m_aM        | 0/0;0/1;0/1         |
| chr7 | 151071827 | 151071827 | C    | A | SLC4A2  | exonic   | nonsynonymous SNV   | SLC4A2:NM_001199693:exon14:c.C2303A;p.A768D,SLC4A2:NM_001199694:exon14:c.C2288A;p.A763D,SLC4A2:NM_01199692:exon15:c.C2303A;p.A777D,SLC4A2:NM_003040:exon15:c.C2303A;p.A777D                                                                                                                                                                                                                                                                                                                                                                       | 1.741 |  |          |          | Fam66_f_m_aM                 | 0/1;0/0;0/1         |
| chr7 | 151072027 | 151072027 | C    | A | SLC4A2  | exonic   | nonsynonymous SNV   | SLC4A2:NM_001199693:exon15:c.C2399A;p.A800D,SLC4A2:NM_001199694:exon15:c.C2384A;p.A795D,SLC4A2:NM_01199692:exon16:c.C2426A;p.A809D,SLC4A2:NM_003040:exon16:c.C2426A;p.A809D                                                                                                                                                                                                                                                                                                                                                                       | 1.736 |  |          | 1.12E-05 | 6.98E-06 Fam81_f_m_aM_uM     | 0/1;0/0;0/1;0/1     |
| chr7 | 151074456 | 151074456 | G    | A | SLC4A2  | exonic   | nonsynonymous SNV   | SLC4A2:NM_001199693:exon17:c.G2821A;p.V941M,SLC4A2:NM_001199694:exon17:c.G2806A;p.V936M,SLC4A2:NM_001199692:exon18:c.G2848A;p.V950M,SLC4A2:NM_003040:exon18:c.G2848A;p.V950M                                                                                                                                                                                                                                                                                                                                                                      | 1.087 |  |          |          | Fam35_f_m_aF_uM              | 0/0;0/1;0/1;0/1     |
| chr7 | 151076026 | 151076026 | G    | A | SLC4A2  | exonic   | nonsynonymous SNV   | SLC4A2:NM_001199693:exon21:c.G3458A;p.R1153H,SLC4A2:NM_001199694:exon21:c.G3443A;p.R1148H,SLC4A2:NM_001199692:exon22:c.G3485A;p.R1162H,SLC4A2:NM_003040:exon22:c.G3485A;p.R1162H                                                                                                                                                                                                                                                                                                                                                                  | 1.584 |  |          | 6.70E-05 | 1.40E-05 Fam56_f_m_aF_aM     | 0/1;0/0;0/1;0/1     |
| chr7 | 151117721 | 151117721 | G    | A | AGAP3   | exonic   | nonsynonymous SNV   | AGAP3:NM_001042535:exon5:c.G650A;p.R217H,AGAP3:NM_001308304:exon5:c.G650A;p.R217H,AGAP3:NM_001308305:exon5:c.G1190A;p.R397H,AGAP3:NM_001350102:exon5:c.G650A;p.R217H,AGAP3:NM_031946:exon5:c.G650A;p.R217H                                                                                                                                                                                                                                                                                                                                        | 2.812 |  |          |          | 6.98E-06 Fam17_f_m_aM_uM     | 0/0;0/1;0/1;0/1     |

|      |           |           |   |   |                 |        |                   |                                                                                                                                                                                                                                                                                                                                                                                                                                                                                                                                                                                                                                                                                                                                                                                                                                                                                                                                                                                                                                                                                                                                                                                                                                          |       |          |                    |                     |                 |                 |
|------|-----------|-----------|---|---|-----------------|--------|-------------------|------------------------------------------------------------------------------------------------------------------------------------------------------------------------------------------------------------------------------------------------------------------------------------------------------------------------------------------------------------------------------------------------------------------------------------------------------------------------------------------------------------------------------------------------------------------------------------------------------------------------------------------------------------------------------------------------------------------------------------------------------------------------------------------------------------------------------------------------------------------------------------------------------------------------------------------------------------------------------------------------------------------------------------------------------------------------------------------------------------------------------------------------------------------------------------------------------------------------------------------|-------|----------|--------------------|---------------------|-----------------|-----------------|
| chr7 | 151123798 | 151123798 | G | A | AGAP3           | exonic | nonsynonymous SNV | AGAP3:NM_001281300:exon9:c.G449A:p.R150Q,AGAP3:NM_001350102:exon9:c.G1133A:p.R378Q,AGAP3:NM_031946:exon9:c.G1133A:p.R378Q,AGAP3:NM_001350103:exon10:c.G95A:p.R32Q,AGAP3:NM_001350104:exon10:c.G95A:p.R32Q                                                                                                                                                                                                                                                                                                                                                                                                                                                                                                                                                                                                                                                                                                                                                                                                                                                                                                                                                                                                                                | 1.015 | 1.13E-05 | Fam34_f_m_aM_uF    | 0/1;0/0;0/1;0/0     |                 |                 |
| chr7 | 151215678 | 151215678 | A | C | ABCF2;LOC114483 | exonic | nonsynonymous SNV | LOC114483834:NM_005692:exon13:c.T1456G;p.C486G,ABCF2:NM_007189:exon13:c.T1456G;p.C486G                                                                                                                                                                                                                                                                                                                                                                                                                                                                                                                                                                                                                                                                                                                                                                                                                                                                                                                                                                                                                                                                                                                                                   | 1.175 | 1.12E-05 | Fam108_f_m_aM      | 0/1;0/0;0/1         |                 |                 |
| chr7 | 151239479 | 151239479 | C | T | SMARCD3         | exonic | nonsynonymous SNV | SMARCD3:NM_001003801:exon12:c.G1315A:p.G439S,SMARCD3:NM_001003802:exon13:c.G1276A:p.G426S,SMARCD3:NM_003078:exon13:c.G1276A:p.G426S                                                                                                                                                                                                                                                                                                                                                                                                                                                                                                                                                                                                                                                                                                                                                                                                                                                                                                                                                                                                                                                                                                      | 1.628 | 0.0001   | 0.0003             | 0.0001              | Fam112_f_m_aM   | 0/0;0/1;0/1     |
| chr7 | 151375875 | 151375875 | T | A | NUB1            | exonic | nonsynonymous SNV | NUB1:NM_001243351:exon13:c.T1495A:p.W499R,NUB1:NM_001363529:exon13:c.T1423A:p.W475R,NUB1:NM_01618:exon13:c.T1453A:p.W485R                                                                                                                                                                                                                                                                                                                                                                                                                                                                                                                                                                                                                                                                                                                                                                                                                                                                                                                                                                                                                                                                                                                | 1.003 | 1.12E-05 | Fam68_f_m_aF_uF_uM | 0/1;0/0;0/1;0/1;0/0 |                 |                 |
| chr7 | 152144819 | 152144819 | A | T | KMT2C           | exonic | nonsynonymous SNV | KMT2C:NM_170606:exon55:c.T14237A:p.L4746Q                                                                                                                                                                                                                                                                                                                                                                                                                                                                                                                                                                                                                                                                                                                                                                                                                                                                                                                                                                                                                                                                                                                                                                                                | 2.385 |          | Fam34_f_m_aM_uF    | 0/0;0/1;0/1;0/0     |                 |                 |
| chr7 | 154540623 | 154540623 | A | T | DPP6            | exonic | nonsynonymous SNV | DPP6:NM_001039350:exon4:c.A357T;p.K119N,DPP6:NM_001290252:exon4:c.A363T;p.K121N,DPP6:NM_001290253:exon4:c.A549T;p.K183N,DPP6:NM_001364501:exon4:c.A357T;p.K119N,DPP6:NM_001364502:exon4:c.A363T;p.K121N,DPP6:NM_001936:exon4:c.A363T;p.K121N,DPP6:NM_130797:exon4:c.A549T;p.K183N,DPP6:NM_001364497:exon5:c.A366T;p.K122N,DPP6:NM_001364498:exon5:c.A366T;p.K122N,DPP6:NM_001364499:exon5:c.A366T;p.K122N,DPP6:NM_001364500:exon5:c.A366T;p.K122N                                                                                                                                                                                                                                                                                                                                                                                                                                                                                                                                                                                                                                                                                                                                                                                        | 1.303 | 1.28E-05 | 6.98E-06           | Fam14_f_m_aM_aM     | 0/1;0/0;0/1;0/0 |                 |
| chr7 | 155071216 | 155071216 | G | A | HTR5A           | exonic | nonsynonymous SNV | HTR5A:NM_024012:exon1:c.G317A:p.R106H                                                                                                                                                                                                                                                                                                                                                                                                                                                                                                                                                                                                                                                                                                                                                                                                                                                                                                                                                                                                                                                                                                                                                                                                    | 1.236 | 3.44E-05 | Fam12_f_m_aM_uM_aM | 0/0;0/1;0/1;0/0;0/0 |                 |                 |
| chr7 | 155298571 | 155298571 | G | T | INSIG1          | exonic | nonsynonymous SNV | INSIG1:NM_001346590:exon2:c.G286T;p.V96L,INSIG1:NM_001346591:exon2:c.G286T;p.V96L,INSIG1:NM_001346592:exon2:c.G286T;p.V96L,INSIG1:NM_001346593:exon2:c.G286T;p.V96L,INSIG1:NM_001346594:exon2:c.G286T;p.V96L,INSIG1:NM_005542:exon2:c.G286T;p.V96L,INSIG1:NM_198337:exon2:c.G286T;p.V96L                                                                                                                                                                                                                                                                                                                                                                                                                                                                                                                                                                                                                                                                                                                                                                                                                                                                                                                                                 | 1.389 | 1.17E-05 | Fam16_f_m_aM_aM    | 0/1;0/0;0/0;0/1     |                 |                 |
| chr7 | 158658401 | 158658401 | C | T | NCAPG2          | exonic | nonsynonymous SNV | NCAPG2:NM_001281933:exon17:c.G1997A:p.R666H,NCAPG2:NM_017760:exon17:c.G1997A:p.R666H,NCAPG2:NM_01281932:exon18:c.G1997A:p.R666H                                                                                                                                                                                                                                                                                                                                                                                                                                                                                                                                                                                                                                                                                                                                                                                                                                                                                                                                                                                                                                                                                                          | 1.315 | 7.34E-05 | 6.82E-05           | 1.40E-05            | Fam17_f_m_aM_uM | 0/1;0/0;0/1;0/1 |
| chr8 | 2001331   | 2001331   | G | A | KBTBD11         | exonic | nonsynonymous SNV | KBTBD11:NM_014867:exon2:c.G139A:p.E47K                                                                                                                                                                                                                                                                                                                                                                                                                                                                                                                                                                                                                                                                                                                                                                                                                                                                                                                                                                                                                                                                                                                                                                                                   | 1.181 |          | Fam70_f_m_aM       | 0/0;0/1;0/1         |                 |                 |
| chr8 | 2002408   | 2002408   | C | T | KBTBD11         | exonic | nonsynonymous SNV | KBTBD11:NM_014867:exon2:c.C1216T;p.R406W                                                                                                                                                                                                                                                                                                                                                                                                                                                                                                                                                                                                                                                                                                                                                                                                                                                                                                                                                                                                                                                                                                                                                                                                 | 2.143 |          | Fam54_f_m_aM_uF    | 0/1;0/0;0/1;0/1     |                 |                 |
| chr8 | 9751655   | 9751655   | C | T | TNKS            | exonic | nonsynonymous SNV | TNKS:NM_003747:exon19:c.C2879T;p.A960V                                                                                                                                                                                                                                                                                                                                                                                                                                                                                                                                                                                                                                                                                                                                                                                                                                                                                                                                                                                                                                                                                                                                                                                                   | 1.148 | 2.23E-05 | 2.09E-05           | Fam84_f_m_aF        | 0/1;0/0;0/1     |                 |
| chr8 | 11201184  | 11201184  | G | C | XKR6            | exonic | nonsynonymous SNV | XKR6:NM_173683:exon1:c.C156G;p.S52R                                                                                                                                                                                                                                                                                                                                                                                                                                                                                                                                                                                                                                                                                                                                                                                                                                                                                                                                                                                                                                                                                                                                                                                                      | 1.695 |          | Fam64_f_m_aM       | 0/1;0/0;0/1         |                 |                 |
| chr8 | 20250006  | 20250006  | C | G | LZTS1           | exonic | nonsynonymous SNV | LZTS1:NM_001362884:exon4:c.G1507C;p.E503Q,LZTS1:NM_021020:exon4:c.G1507C;p.E503Q                                                                                                                                                                                                                                                                                                                                                                                                                                                                                                                                                                                                                                                                                                                                                                                                                                                                                                                                                                                                                                                                                                                                                         | 1.121 | 2.30E-05 | 6.98E-06           | Fam44_f_m_aM_uF     | 0/0;0/1;0/1;0/0 |                 |
| chr8 | 22069916  | 22069916  | C | T | DMTN            | exonic | nonsynonymous SNV | DMTN:NM_001323400:exon4:c.C310T;p.P104S,DMTN:NM_001302817:exon5:c.C310T;p.P104S,DMTN:NM_001323388:exon5:c.C310T;p.P104S,DMTN:NM_001323398:exon5:c.C310T;p.P104S,DMTN:NM_001323399:exon5:c.C310T;p.P104S,DMTN:NM_001323401:exon5:c.C310T;p.P104S,DMTN:NM_001114139:exon6:c.C355T;p.P119S,DMTN:NM_001323381:exon6:c.C430T;p.P144S,DMTN:NM_001323385:exon6:c.C430T;p.P144S,DMTN:NM_001323387:exon6:c.C355T;p.P119S,DMTN:NM_001323389:exon6:c.C385T;p.P129S,DMTN:NM_001323390:exon6:c.C385T;p.P129S,DMTN:NM_001323391:exon6:c.C355T;p.P119S,DMTN:NM_001323392:exon6:c.C355T;p.P119S,DMTN:NM_001323393:exon6:c.C355T;p.P119S,DMTN:NM_001323394:exon6:c.C355T;p.P119S,DMTN:NM_001323395:exon6:c.C355T;p.P119S,DMTN:NM_001323396:exon6:c.C355T;p.P119S,DMTN:NM_001323397:exon6:c.C355T;p.P119S,DMTN:NM_00114135:exon7:c.C430T;p.P144S,DMTN:NM_00114136:exon7:c.C430T;p.P144S,DMTN:NM_00114137:exon7:c.C430T;p.P144S,DMTN:NM_00114138:exon7:c.C430T;p.P144S,DMTN:NM_001302816:exon7:c.C430T;p.P144S,DMTN:NM_001323378:exon7:c.C430T;p.P144S,DMTN:NM_001323379:exon7:c.C430T;p.P144S,DMTN:NM_001323380:exon7:c.C430T;p.P144S,DMTN:NM_001323382:exon7:c.C430T;p.P144S,DMTN:NM_001323383:exon7:c.C430T;p.P144S,DMTN:NM_001978:exon7:c.C430T;p.P144S | 1.031 |          |                    | Fam116_f_m_aM_aF    | 0/0;0/1;0/1;0/0 |                 |
| chr8 | 22221541  | 22221541  | C | T | PHYHIP          | exonic | nonsynonymous SNV | PHYHIP:NM_001363312:exon5:c.G805A:p.V269M,PHYHIP:NM_014759:exon5:c.G805A:p.V269M,PHYHIP:NM_001099335:exon6:c.G805A:p.V269M,PHYHIP:NM_001363311:exon6:c.G805A:p.V269M                                                                                                                                                                                                                                                                                                                                                                                                                                                                                                                                                                                                                                                                                                                                                                                                                                                                                                                                                                                                                                                                     | 1.217 | 2.26E-05 | 6.98E-06           | Fam44_f_m_aM_uF     | 0/1;0/0;0/1;0/0 |                 |



|      |          |          |   |   |          |        |                   |                                                                                                                                                                                                                                                                                                                                                                                                                                                                                                                                                                                                |       |          |          |          |                     |                     |
|------|----------|----------|---|---|----------|--------|-------------------|------------------------------------------------------------------------------------------------------------------------------------------------------------------------------------------------------------------------------------------------------------------------------------------------------------------------------------------------------------------------------------------------------------------------------------------------------------------------------------------------------------------------------------------------------------------------------------------------|-------|----------|----------|----------|---------------------|---------------------|
| chr8 | 22415856 | 22415856 | G | A | SLC39A14 | exonic | nonsynonymous SNV | SLC39A14:NM_001128431:exon6:c.G838A:p.G280R,SLC39A14:NM_001135153:exon6:c.G838A:p.G280R,SLC39A14:NM_001135154:exon6:c.G838A:p.G280R,SLC39A14:NM_001351659:exon6:c.G868A:p.G290R,SLC39A14:NM_001351660:exon6:c.G838A:p.G280R,SLC39A14:NM_0153559:exon6:c.G838A:p.G280R,SLC39A14:NM_001351655:exon7:c.G838A:p.G280R,SLC39A14:NM_001351658:exon7:c.G868A:p.G290R,SLC39A14:NM_001351656:exon8:c.G838A:p.G280R,SLC39A14:NM_001351657:exon8:c.G868A:p.G290R                                                                                                                                          | 1.653 | 0.0004   | 0.0004   | 0.0001   | Fam69_f_m_aM        | 0/1;0/0;0/1         |
| chr8 | 23010577 | 23010577 | G | A | RHOBTB2  | exonic | nonsynonymous SNV | RHOBTB2:NM_001160037:exon7:c.G1681A:p.V561M,RHOBTB2:NM_015178:exon7:c.G1660A:p.V554M,RHOBTB2:NM_001160036:exon9:c.G1726A:p.V576M,DPYSL2:NM_001197293:exon7:c.C968T:p.T323M,DPYSL2:NM_001244604:exon7:c.C545T:p.T182M,DPYSL2:NM_001386:exon7:c.C653T:p.T218M                                                                                                                                                                                                                                                                                                                                    | 1.312 | 7.35E-05 | 4.47E-05 | 2.10E-05 | Fam102_f_m_aM       | 0/0;0/1;0/1         |
| chr8 | 26627903 | 26627903 | C | T | DPYSL2   | exonic | nonsynonymous SNV | DPYSL2:NM_001197293:exon7:c.C968T:p.T323M,DPYSL2:NM_001244604:exon7:c.C545T:p.T182M,DPYSL2:NM_001386:exon7:c.C653T:p.T218M                                                                                                                                                                                                                                                                                                                                                                                                                                                                     | 1.97  |          | 7.46E-05 | 2.79E-05 | Fam52_f_m_aM        | 0/1;0/0;0/1         |
| chr8 | 27605244 | 27605244 | G | A | CLU      | exonic | nonsynonymous SNV | CLU:NM_0018831:exon5:c.C509T:p.T170M                                                                                                                                                                                                                                                                                                                                                                                                                                                                                                                                                           | 1.042 |          | 1.12E-05 | 1.40E-05 | Fam56_f_m_aF_aM     | 0/1;0/0;0/1;0/0     |
| chr8 | 27907159 | 27907159 | C | T | SCARA5   | exonic | nonsynonymous SNV | SCARA5:NM_173833:exon6:c.G1085A:p.R362H,ELP3:NM_001284220:exon3:c.A108G:p.I36M,ELP3:NM_001284224:exon3:c.A31G:p.M11V,ELP3:NM_001284225:exon3:c.A31G:p.M11V,ELP3:NM_001284226:exon3:c.A48G:p.I16M,ELP3:NM_001284222:exon4:c.A282G:p.I94M,ELP3:NM_018091:exon4:c.A324G:p.I108M,INTS9:NM_001172562:exon4:c.C170T:p.P57L,INTS9:NM_01363038:exon4:c.C242T:p.P81L,INTS9:NM_018250:exon4:c.C242T:p.P81L                                                                                                                                                                                               | 1.023 | 7.35E-05 | 0.0008   | 8.38E-05 | Fam19_f_m_aM        | 0/0;0/1;0/1         |
| chr8 | 28106778 | 28106778 | A | G | ELP3     | exonic | nonsynonymous SNV | ELP3:NM_001284220:exon3:c.A108G:p.I36M,ELP3:NM_001284224:exon3:c.A31G:p.M11V,ELP3:NM_001284225:exon3:c.A31G:p.M11V,ELP3:NM_001284226:exon3:c.A48G:p.I16M,ELP3:NM_001284222:exon4:c.A282G:p.I94M,ELP3:NM_018091:exon4:c.A324G:p.I108M,INTS9:NM_001172562:exon4:c.C170T:p.P57L,INTS9:NM_01363038:exon4:c.C242T:p.P81L,INTS9:NM_018250:exon4:c.C242T:p.P81L                                                                                                                                                                                                                                       | 1.122 |          |          | 6.98E-06 | Fam7_f_m_aM_aM_uM   | 0/0;0/1;0/0;0/1;0/1 |
| chr8 | 28846766 | 28846766 | G | A | INTS9    | exonic | nonsynonymous SNV | INTS9:NM_001172562:exon4:c.C170T:p.P57L,INTS9:NM_01363038:exon4:c.C242T:p.P81L,INTS9:NM_018250:exon4:c.C242T:p.P81L                                                                                                                                                                                                                                                                                                                                                                                                                                                                            | 1.11  | 0.0001   | 0.0001   | 7.69E-05 | Fam48_f_m_aM_uM     | 0/0;0/1;0/1;0/0     |
| chr8 | 29140073 | 29140073 | A | G | KIF13B   | exonic | nonsynonymous SNV | KIF13B:NM_015254:exon21:c.T2603C:p.L868P                                                                                                                                                                                                                                                                                                                                                                                                                                                                                                                                                       | 1.007 | 0.0003   |          | 6.28E-05 | Fam46_f_m_aM_uM     | 0/0;0/1;0/1;0/0     |
| chr8 | 30693039 | 30693039 | T | C | GSR      | exonic | nonsynonymous SNV | GSR:NM_000637:exon8:c.A812G:p.D271G,NSD3:NM_001195103:exon8:c.A812G:p.D271G,NRG1:NM_001159996:exon4:c.G317A:p.C106Y,NRG1:NM_001322197:exon4:c.G308A:p.C103Y,NRG1:NM_001322202:exon4:c.G5A:p.C2Y,NRG1:NM_001322201:exon5:c.G5A:p.C2Y,NRG1:NM_001322205:exon5:c.G959A:p.C320Y,NRG1:NM_001322206:exon5:c.G959A:p.C320Y,NRG1:NM_00132207:exon5:c.G959A:p.C320Y,NRG1:NM_001160004:exon8:c.G770A:p.C257Y,NRG1:NM_001160008:exon8:c.G770A:p.C257Y,NRG1:NM_013957:exon8:c.G770A:p.C257Y,NRG1:NM_013960:exon8:c.G779A:p.C260Y,NRG1:NM_013964:exon8:c.G779A:p.C260Y,NRG1:NM_013956:exon9:c.G794A:p.C265Y | 1.161 |          |          |          | Fam16_f_m_aM_aM     | 0/1;0/0;0/0;0/1     |
| chr8 | 32754450 | 32754450 | G | A | NRG1     | exonic | nonsynonymous SNV | NRG1:NM_001322197:exon4:c.G308A:p.C103Y,NRG1:NM_001322202:exon4:c.G5A:p.C2Y,NRG1:NM_001322201:exon5:c.G5A:p.C2Y,NRG1:NM_001322205:exon5:c.G959A:p.C320Y,NRG1:NM_001322206:exon5:c.G959A:p.C320Y,NRG1:NM_00132207:exon5:c.G959A:p.C320Y,NRG1:NM_001160004:exon8:c.G770A:p.C257Y,NRG1:NM_001160008:exon8:c.G770A:p.C257Y,NRG1:NM_013957:exon8:c.G770A:p.C257Y,NRG1:NM_013960:exon8:c.G779A:p.C260Y,NRG1:NM_013964:exon8:c.G779A:p.C260Y,NRG1:NM_013956:exon9:c.G794A:p.C265Y                                                                                                                     | 1.089 |          |          |          | Fam103_f_m_aM       | 0/1;0/0;0/1         |
| chr8 | 33597491 | 33597491 | C | A | DUSP26   | exonic | nonsynonymous SNV | DUSP26:NM_001305116:exon1:c.G25T:p.A9S,DUSP26:NM_001305115:exon2:c.G25T:p.A9S,DUSP26:NM_024025:exon2:c.G25T:p.A9S                                                                                                                                                                                                                                                                                                                                                                                                                                                                              | 1.272 | 0.0002   | 0.0002   | 0.0002   | Fam83_f_m_aF        | 0/0;0/1;0/1         |
| chr8 | 33597491 | 33597491 | C | A | DUSP26   | exonic | nonsynonymous SNV | DUSP26:NM_001305116:exon1:c.G25T:p.A9S,DUSP26:NM_001305115:exon2:c.G25T:p.A9S,DUSP26:NM_024025:exon2:c.G25T:p.A9S                                                                                                                                                                                                                                                                                                                                                                                                                                                                              | 1.272 | 0.0002   | 0.0002   | 0.0002   | Fam99_f_m_aM_aM     | 0/0;0/1;0/1;0/1     |
| chr8 | 38138971 | 38138971 | A | G | ASH2L    | exonic | nonsynonymous SNV | ASH2L:NM_001261832:exon15:c.A1406G:p.D469G,ASH2L:NM_001282272:exon15:c.A1370G:p.D457G,ASH2L:NM_001105214:exon16:c.A1505G:p.D502G,ASH2L:NM_004674:exon16:c.A1787G:p.D596G                                                                                                                                                                                                                                                                                                                                                                                                                       | 1.336 |          |          |          | Fam45_f_m_aM_uF     | 0/0;0/1;0/1;0/1     |
| chr8 | 38337353 | 38337353 | C | T | NSD3     | exonic | nonsynonymous SNV | NSD3:NM_017778:exon4:c.G862A:p.V288I,NSD3:NM_023034:exon4:c.G862A:p.V288I                                                                                                                                                                                                                                                                                                                                                                                                                                                                                                                      | 1.014 |          | 1.12E-05 | 1.40E-05 | Fam115_f_m_aF_aM_aF | 0/1;0/0;0/1;0/0;0/0 |
| chr8 | 38348157 | 38348157 | G | C | NSD3     | exonic | nonsynonymous SNV | NSD3:NM_017778:exon2:c.C15G:p.F5L,NSD3:NM_023034:exon2:c.C15G:p.F5L                                                                                                                                                                                                                                                                                                                                                                                                                                                                                                                            | 1.398 |          |          |          | Fam61_f_m_aM        | 0/1;0/0;0/1         |
| chr8 | 41693943 | 41693943 | G | G | ANK1     | exonic | nonsynonymous SNV | ANK1:NM_000037:exon29:c.G3487C:p.G1163R,ANK1:NM_020475:exon29:c.G3487C:p.G1163R,ANK1:NM_020476:exon29:c.G3487C:p.G1163R,ANK1:NM_020477:exon29:c.G3487C:p.G1163R,ANK1:NM_001142446:exon30:c.G3610C:p.G1204R                                                                                                                                                                                                                                                                                                                                                                                     | 1.101 |          |          |          | Fam43_f_m_aM        | 0/0;0/1;0/1         |
| chr8 | 41704042 | 41704042 | G | C | ANK1     | exonic | nonsynonymous SNV | ANK1:NM_000037:exon20:c.C2294G:p.S765W,ANK1:NM_01142446:exon20:c.C2393G:p.S798W,ANK1:NM_020475:exon20:c.C2294G:p.S765W,ANK1:NM_020476:exon20:c.C2294G:p.S765W,ANK1:NM_020477:exon20:c.C2294G:p.S765W                                                                                                                                                                                                                                                                                                                                                                                           | 1.122 |          |          |          | Fam1_f_m_aM         | 0/1;0/0;0/1         |
| chr8 | 41980860 | 41980860 | G | A | KAT6A    | exonic | nonsynonymous SNV | KAT6A:NM_001305878:exon5:c.C893T:p.T298I,KAT6A:NM_006766:exon5:c.C893T:p.T298I                                                                                                                                                                                                                                                                                                                                                                                                                                                                                                                 | 1.279 | 7.34E-05 | 4.47E-05 | 2.09E-05 | Fam66_f_m_aM        | 0/0;0/1;0/1         |
| chr8 | 42154791 | 42154791 | C | G | AP3M2    | exonic | nonsynonymous SNV | AP3M2:NM_006803:exon2:c.C104G:p.A35G,AP3M2:NM_01134296:exon3:c.C104G:p.A35G                                                                                                                                                                                                                                                                                                                                                                                                                                                                                                                    | 1.119 | 0.0004   | 0.0006   | 0.0003   | Fam79_f_m_aM_uM     | 0/0;0/1;0/1;0/0     |
| chr8 | 42417936 | 42417936 | C | T | SLC20A2  | exonic | nonsynonymous SNV | SLC20A2:NM_001257180:exon11:c.G1826A:p.R609H,SLC20A2:NM_001257181:exon11:c.G1826A:p.R609H,SLC20A2:NM_006749:exon11:c.G1826A:p.R609H                                                                                                                                                                                                                                                                                                                                                                                                                                                            | 1.797 |          | 6.54E-05 |          | Fam116_f_m_aM_aF    | 0/1;0/0;0/0;0/1     |
| chr8 | 52940384 | 52940384 | C | A | NPBWR1   | exonic | nonsynonymous SNV | NPBWR1:NM_005285:exon1:c.C477A:p.S159R                                                                                                                                                                                                                                                                                                                                                                                                                                                                                                                                                         | 1.226 | 7.35E-05 | 3.32E-05 | 1.40E-05 | Fam1_f_m_aM         | 0/1;0/0;0/1         |
| chr8 | 52940717 | 52940717 | C | A | NPBWR1   | exonic | nonsynonymous SNV | NPBWR1:NM_005285:exon1:c.C810A:p.S270R                                                                                                                                                                                                                                                                                                                                                                                                                                                                                                                                                         | 1.231 |          | 4.49E-05 | 1.40E-05 | Fam26_f_m_aM_uM     | 0/0;0/1;0/1;0/1     |
| chr8 | 54458221 | 54458221 | G | T | SOX17    | exonic | nonsynonymous SNV | SOX17:NM_022454:exon1:c.G83T:p.G28V                                                                                                                                                                                                                                                                                                                                                                                                                                                                                                                                                            | 2.12  | 0.0006   | 0.0002   | 0.0001   | Fam38_f_m_aM        | 0/0;0/1;0/1         |
| chr8 | 56966313 | 56966313 | C | T | IMPAD1   | exonic | nonsynonymous SNV | IMPAD1:NM_017813:exon4:c.G686A:p.R229H                                                                                                                                                                                                                                                                                                                                                                                                                                                                                                                                                         | 1.235 |          | 7.45E-05 | 4.19E-05 | Fam46_f_m_aM_uM     | 0/0;0/1;0/1;0/1     |

|      |          |          |   |   |         |        |                   |                                                                                                                                                                                                                                                                                                                                                                                                                                                                                                                                                                                                                                                                                                                                                                                                                                                                                                                                                                                              |       |          |                                        |                         |
|------|----------|----------|---|---|---------|--------|-------------------|----------------------------------------------------------------------------------------------------------------------------------------------------------------------------------------------------------------------------------------------------------------------------------------------------------------------------------------------------------------------------------------------------------------------------------------------------------------------------------------------------------------------------------------------------------------------------------------------------------------------------------------------------------------------------------------------------------------------------------------------------------------------------------------------------------------------------------------------------------------------------------------------------------------------------------------------------------------------------------------------|-------|----------|----------------------------------------|-------------------------|
| chr8 | 63187209 | 63187209 | G | T | YTHDF3  | exonic | nonsynonymous SNV | YTHDF3:NM_001277816:exon3:c.G1045T;p.A349S,YTHDF3:NM_001277817:exon4:c.G1045T;p.A349S,YTHDF3:NM_001277818:exon4:c.G1045T;p.A349S,YTHDF3:NM_152758:exon4:c.G1198T;p.A400S,YTHDF3:NM_001277813:exon5:c.G1207T;p.A403S,YTHDF3:NM_001277814:exon5:c.G1207T;p.A403S,YTHDF3:NM_001277815:exon5:c.G1045T;p.A349S                                                                                                                                                                                                                                                                                                                                                                                                                                                                                                                                                                                                                                                                                    | 1.003 | 1.13E-05 | Fam9_f_m_aM_dM_uF                      | 0/1;0/0;0/1;0/1;0/0     |
| chr8 | 66597425 | 66597425 | T | G | MYBL1   | exonic | nonsynonymous SNV | MYBL1:NM_001080416:exon5:c.A417C;p.K139N,MYBL1:NM_001144755:exon5:c.A417C;p.K139N,MYBL1:NM_001294282:exon5:c.A417C;p.K139N                                                                                                                                                                                                                                                                                                                                                                                                                                                                                                                                                                                                                                                                                                                                                                                                                                                                   | 2.352 |          | Fam110_f_m_aM_aM_uMs                   | 0/0;0/1;0/1;0/0;0/0     |
| chr8 | 67240203 | 67240203 | T | C | ARFGEF1 | exonic | nonsynonymous SNV | ARFGEF1:NM_006421:exon20:c.A2938G;p.I980V                                                                                                                                                                                                                                                                                                                                                                                                                                                                                                                                                                                                                                                                                                                                                                                                                                                                                                                                                    | 1.402 |          | Fam29_f_m_aF_uM                        | 0/0;0/1;0/1;0/1         |
| chr8 | 68055950 | 68055950 | C | T | PREX2   | exonic | nonsynonymous SNV | PREX2:NM_024870:exon10:c.C1214T;p.T405M,PREX2:NM_025170:exon10:c.C1214T;p.T405M                                                                                                                                                                                                                                                                                                                                                                                                                                                                                                                                                                                                                                                                                                                                                                                                                                                                                                              | 1.328 | 0.0002   | 0.0002 Fam48_f_m_aM_uM                 | 0/0;0/1;0/1;0/0         |
| chr8 | 68069862 | 68069862 | A | G | PREX2   | exonic | nonsynonymous SNV | PREX2:NM_024870:exon13:c.A1471G;p.S491G,PREX2:NM_025170:exon13:c.A1471G;p.S491G                                                                                                                                                                                                                                                                                                                                                                                                                                                                                                                                                                                                                                                                                                                                                                                                                                                                                                              | 1.257 |          | Fam5_f_m_aM                            | 0/1;0/0;0/1             |
| chr8 | 72568050 | 72568050 | G | A | KCNB2   | exonic | nonsynonymous SNV | KCNB2:NM_004770:exon2:c.G316A;p.G106R                                                                                                                                                                                                                                                                                                                                                                                                                                                                                                                                                                                                                                                                                                                                                                                                                                                                                                                                                        | 1.661 | 7.35E-05 | 0.0002 2.10E-05 Fam103_f_m_aM          | 0/1;0/0;0/1             |
| chr8 | 80486893 | 80486893 | A | G | ZBTB10  | exonic | nonsynonymous SNV | ZBTB10:NM_001105539:exon1:c.A83G;p.N28S,ZBTB10:NM_023929:exon1:c.A83G;p.N28S                                                                                                                                                                                                                                                                                                                                                                                                                                                                                                                                                                                                                                                                                                                                                                                                                                                                                                                 | 1.417 | 3.10E-05 | 7.04E-06 Fam95_f_m_aM_aM_uF            | 0/1;0/0;0/1;0/1;0/0     |
| chr8 | 84529316 | 84529316 | C | A | RALYL   | exonic | nonsynonymous SNV | RALYL:NM_001100391:exon2:c.C34A;p.P12T,RALYL:NM_001354321:exon2:c.C34A;p.P12T,RALYL:NM_001354322:exon2:c.C34A;p.P12T,RALYL:NM_001354323:exon2:c.C34A;p.P12T                                                                                                                                                                                                                                                                                                                                                                                                                                                                                                                                                                                                                                                                                                                                                                                                                                  | 1.09  | 0.0009   | 0.0004 0.0003 Fam69_f_m_aM             | 0/0;0/1;0/1             |
| chr8 | 84529428 | 84529428 | T | C | RALYL   | exonic | nonsynonymous SNV | RALYL:NM_001100391:exon2:c.T146C;p.V49A,RALYL:NM_001100393:exon2:c.T107C;p.V36A,RALYL:NM_001287243:exon2:c.T107C;p.V36A,RALYL:NM_001354311:exon2:c.T107C;p.V36A,RALYL:NM_001354313:exon2:c.T107C;p.V36A,RALYL:NM_001354314:exon2:c.T107C;p.V36A,RALYL:NM_001354315:exon2:c.T107C;p.V36A,RALYL:NM_001354321:exon2:c.T146C;p.V49A,RALYL:NM_001354322:exon2:c.T146C;p.V49A,RALYL:NM_001354323:exon2:c.T146C;p.V49A,RALYL:NM_001354325:exon2:c.T107C;p.V36A,RALYL:NM_173848:exon2:c.T107C;p.V36A,RALYL:NM_001100392:exon3:c.T107C;p.V36A,RALYL:NM_001354307:exon3:c.T107C;p.V36A,RALYL:NM_001354308:exon3:c.T107C;p.V36A,RALYL:NM_001354312:exon3:c.T107C;p.V36A,RALYL:NM_001354316:exon3:c.T107C;p.V36A,RALYL:NM_001354317:exon3:c.T107C;p.V36A,RALYL:NM_001354318:exon3:c.T107C;p.V36A,RALYL:NM_001354319:exon3:c.T107C;p.V36A,RALYL:NM_001354320:exon3:c.T107C;p.V36A,RALYL:NM_001354305:exon4:c.T107C;p.V36A,RALYL:NM_001354306:exon4:c.T107C;p.V36A,RALYL:NM_001354309:exon4:c.T107C;p.V36A | 1.125 | 0.0009   | 0.0009 0.0006 Fam17_f_m_aM_uM          | 0/0;0/1;0/1;0/0         |
| chr8 | 84529428 | 84529428 | T | A | RALYL   | exonic | nonsynonymous SNV | RALYL:NM_001100391:exon2:c.T146A;p.V49D,RALYL:NM_001100393:exon2:c.T107A;p.V36D,RALYL:NM_001287243:exon2:c.T107A;p.V36D,RALYL:NM_001354311:exon2:c.T107A;p.V36D,RALYL:NM_001354313:exon2:c.T107A;p.V36D,RALYL:NM_001354314:exon2:c.T107A;p.V36D,RALYL:NM_001354315:exon2:c.T107A;p.V36D,RALYL:NM_001354321:exon2:c.T146A;p.V49D,RALYL:NM_001354322:exon2:c.T146A;p.V49D,RALYL:NM_001354323:exon2:c.T146A;p.V49D,RALYL:NM_001354325:exon2:c.T107A;p.V36D,RALYL:NM_173848:exon2:c.T107A;p.V36D,RALYL:NM_001100392:exon3:c.T107A;p.V36D,RALYL:NM_001354307:exon3:c.T107A;p.V36D,RALYL:NM_001354308:exon3:c.T107A;p.V36D,RALYL:NM_001354312:exon3:c.T107A;p.V36D,RALYL:NM_001354316:exon3:c.T107A;p.V36D,RALYL:NM_001354317:exon3:c.T107A;p.V36D,RALYL:NM_001354318:exon3:c.T107A;p.V36D,RALYL:NM_001354319:exon3:c.T107A;p.V36D,RALYL:NM_001354320:exon3:c.T107A;p.V36D,RALYL:NM_001354305:exon4:c.T107A;p.V36D,RALYL:NM_001354306:exon4:c.T107A;p.V36D,RALYL:NM_001354309:exon4:c.T107A;p.V36D | 1.464 | 7.34E-05 | 0.0003 5.58E-05 Fam34_f_m_aM_uF        | 0/0;0/1;0/1;0/0         |
| chr8 | 86448422 | 86448422 | A | T | WWP1    | exonic | nonsynonymous SNV | WWP1:NM_007013:exon20:c.A2182T;p.M728L                                                                                                                                                                                                                                                                                                                                                                                                                                                                                                                                                                                                                                                                                                                                                                                                                                                                                                                                                       | 1.058 |          | Fam52_f_m_aM                           | 0/1;0/0;0/1             |
| chr8 | 89769803 | 89769803 | T | C | RIPK2   | exonic | nonsynonymous SNV | RIPK2:NM_003821:exon4:c.T515C;p.M172T                                                                                                                                                                                                                                                                                                                                                                                                                                                                                                                                                                                                                                                                                                                                                                                                                                                                                                                                                        | 1.105 | 7.37E-05 | 0.0001 7.69E-05 Fam7_f_m_aM_aM_uM      | 0/1;0/0;0/1;0/0;0/0     |
| chr8 | 89769803 | 89769803 | T | C | RIPK2   | exonic | nonsynonymous SNV | RIPK2:NM_003821:exon4:c.T515C;p.M172T                                                                                                                                                                                                                                                                                                                                                                                                                                                                                                                                                                                                                                                                                                                                                                                                                                                                                                                                                        | 1.105 | 7.37E-05 | 0.0001 7.69E-05 Fam77_f_m_aM_aF_uM_uFs | 0/1;0/0;0/1;0/0;0/0;0/0 |
| chr8 | 90060678 | 90060678 | T | C | CALB1   | exonic | nonsynonymous SNV | CALB1:NM_001366795:exon9:c.A548G;p.E183G,CALB1:NM_004929:exon10:c.A623G;p.E208G                                                                                                                                                                                                                                                                                                                                                                                                                                                                                                                                                                                                                                                                                                                                                                                                                                                                                                              | 1.601 | 1.12E-05 | Fam56_f_m_aF_aM                        | 0/1;0/0;0/0;0/1         |
| chr8 | 90645482 | 90645482 | G | T | TMEM64  | exonic | nonsynonymous SNV | TMEM64:NM_001008495:exon1:c.C424A;p.R142S,TMEM64:NM_001146273:exon1:c.C424A;p.R142S                                                                                                                                                                                                                                                                                                                                                                                                                                                                                                                                                                                                                                                                                                                                                                                                                                                                                                          | 2.009 | 0.0002   | Fam116_f_m_aM_aF                       | 0/1;0/0;0/1;0/0         |
| chr8 | 90925596 | 90925596 | C | G | NECAB1  | exonic | nonsynonymous SNV | NECAB1:NM_022351:exon7:c.C556G;p.R186G                                                                                                                                                                                                                                                                                                                                                                                                                                                                                                                                                                                                                                                                                                                                                                                                                                                                                                                                                       | 1.362 | 3.28E-05 | 2.79E-05 Fam7_f_m_aM_aM_uM             | 0/1;0/0;0/1;0/0;0/0     |

|      |           |           |      |   |         |        |                     |                                                                                                                                                                                                                                                                                                                                                                                                                                                                                                                                                                                                                                            |       |          |          |                     |                      |                     |
|------|-----------|-----------|------|---|---------|--------|---------------------|--------------------------------------------------------------------------------------------------------------------------------------------------------------------------------------------------------------------------------------------------------------------------------------------------------------------------------------------------------------------------------------------------------------------------------------------------------------------------------------------------------------------------------------------------------------------------------------------------------------------------------------------|-------|----------|----------|---------------------|----------------------|---------------------|
| chr8 | 92014815  | 92014815  | T    | C | RUNX1T1 | exonic | nonsynonymous SNV   | RUNX1T1:NM_175636:exon2:c.A121G:p.N41D,RUNX1T1:NM_001198633:exon3:c.A172G:p.N58D,RUNX1T1:NM_001198634:exon3:c.A265G:p.N89D,RUNX1T1:NM_004349:exon3:c.A151G:p.N51D,RUNX1T1:NM_175635:exon3:c.A121G:p.N41D,RUNX1T1:NM_001198628:exon4:c.A232G:p.N78D,RUNX1T1:NM_001198629:exon4:c.A232G:p.N78D,RUNX1T1:NM_001198631:exon4:c.A232G:p.N78D,RUNX1T1:NM_001198632:exon4:c.A151G:p.N51D,RUNX1T1:NM_001198679:exon4:c.A409G:p.N137D,RUNX1T1:NM_175634:exon4:c.A232G:p.N78D,RUNX1T1:NM_001198626:exon5:c.A232G:p.N78D,RUNX1T1:NM_001198630:exon5:c.A232G:p.N78D,RUNX1T1:NM_001198627:exon6:c.A232G:p.N78D,RUNX1T1:NM_001198625:exon7:c.A151G:p.N51D | 1.233 |          |          | Fam118_f_m_aM_aF_uM | 0/0;0/1;0/0;0/1;0/0  |                     |
| chr8 | 94490022  | 94490022  | C    | T | VIRMA   | exonic | nonsynonymous SNV   | VIRMA:NM_015496:exon23:c.G5201A:p.R1734Q                                                                                                                                                                                                                                                                                                                                                                                                                                                                                                                                                                                                   | 1.377 |          | 7.46E-05 | 6.98E-06            | Fam26_f_m_aM_uM      | 0/0;0/1;0/1;0/1     |
| chr8 | 94492749  | 94492749  | G    | A | VIRMA   | exonic | nonsynonymous SNV   | VIRMA:NM_015496:exon21:c.C4711T:p.R1571C                                                                                                                                                                                                                                                                                                                                                                                                                                                                                                                                                                                                   | 1.128 |          | 0.0004   |                     | Fam29_f_m_aF_uM      | 0/0;0/1;0/1;0/0     |
| chr8 | 96160371  | 96160371  | C    | T | GDF6    | exonic | nonsynonymous SNV   | GDF6:NM_001001557:exon1:c.G322A:p.A108T                                                                                                                                                                                                                                                                                                                                                                                                                                                                                                                                                                                                    | 1.599 |          | 0.0002   | 5.58E-05            | Fam12_f_m_aM_uM_aM   | 0/0;0/1;0/1;0/0;0/1 |
| chr8 | 96160421  | 96160421  | C    | T | GDF6    | exonic | nonsynonymous SNV   | GDF6:NM_001001557:exon1:c.G272A:p.R91H                                                                                                                                                                                                                                                                                                                                                                                                                                                                                                                                                                                                     | 2.102 |          | 1.13E-05 | 6.98E-06            | Fam5_f_m_aM          | 0/1;0/0;0/1         |
| chr8 | 96299719  | 96299719  | A    | G | PTDSS1  | exonic | nonsynonymous SNV   | PTDSS1:NM_001290225:exon4:c.A188G:p.N635,PTDSS1:NM_014754:exon6:c.A626G:p.N2095,MTDH:NM_001363139:exon6:c.G986A:p.G329D,MTDH:NM_001363136:exon7:c.G1085A:p.G362D,MTDH:NM_001363138:exon7:c.G1052A:p.G351D,MTDH:NM_178812:exon8:c.G1151A:p.G384D,MTDH:NM_001363137:exon9:c.G1241A:p.G414D                                                                                                                                                                                                                                                                                                                                                   | 1.512 | 0.0003   | 0.0001   | 1.40E-05            | Fam78_f_m_aF_uM      | 0/0;0/1;0/1;0/1     |
| chr8 | 97706629  | 97706629  | G    | A | MTDH    | exonic | nonsynonymous SNV   | PTDSS1:NM_001290225:exon4:c.A188G:p.N635,PTDSS1:NM_014754:exon6:c.A626G:p.N2095,MTDH:NM_001363139:exon6:c.G986A:p.G329D,MTDH:NM_001363136:exon7:c.G1085A:p.G362D,MTDH:NM_001363138:exon7:c.G1052A:p.G351D,MTDH:NM_178812:exon8:c.G1151A:p.G384D,MTDH:NM_001363137:exon9:c.G1241A:p.G414D                                                                                                                                                                                                                                                                                                                                                   | 1.212 | 7.34E-05 | 0.0002   | 2.09E-05            | Fam109_f_m_aM        | 0/0;0/1;0/1         |
| chr8 | 98044990  | 98044990  | T    | G | RPL30   | exonic | nonsynonymous SNV   | RPL30:NM_000989:exon3:c.A120C:p.Q40H                                                                                                                                                                                                                                                                                                                                                                                                                                                                                                                                                                                                       | 1.177 |          |          |                     | Fam82_f_m_aM_uF      | 0/1;0/0;0/1;0/1     |
| chr8 | 100718215 | 100718215 | A    | C | PABPC1  | exonic | nonsynonymous SNV   | PABPC1:NM_002568:exon2:c.T259G:p.S87A                                                                                                                                                                                                                                                                                                                                                                                                                                                                                                                                                                                                      | 2.642 |          |          |                     | Fam92_f_m_aM_raM     | 0/1;0/0;0/0;0/1     |
| chr8 | 102265260 | 102265260 | G    | - | UBR5    | exonic | frameshift deletion | UBR5:NM_001282873:exon53:c.7438delC;p.H2480Mfs*7,UBR5:NM_015902:exon53:c.7441delC;p.H2481Mfs*7                                                                                                                                                                                                                                                                                                                                                                                                                                                                                                                                             | 0.062 |          |          |                     | Fam110_f_m_aM_aM_uMs | 0/0;0/0;0/1;0/0;0/0 |
| chr8 | 102360134 | 102360134 | C    | T | UBR5    | exonic | nonsynonymous SNV   | UBR5:NM_001282873:exon5:c.G323A:p.S108N,UBR5:NM_015902:exon5:c.G323A:p.S108N                                                                                                                                                                                                                                                                                                                                                                                                                                                                                                                                                               | 1.398 |          |          |                     | Fam120_f_m_aM_aM     | 0/1;0/0;0/1;0/1     |
| chr8 | 103927883 | 103927891 | GGTT | - | RIMS2   | exonic | stopgain            | RIMS2:NM_001348504:exon9:c.1662_1668del:p.V555*,RIMS2:NM_001348507:exon9:c.1662_1668del:p.V555*,RIMS2:NM_001100117:exon11:c.2238_2244del:p.V747*                                                                                                                                                                                                                                                                                                                                                                                                                                                                                           | 0.408 |          |          |                     | Fam37_f_m_aF_uM      | 0/1;0/0;0/1;0/1     |
| chr8 | 107303302 | 107303302 | C    | T | ANGPT1  | exonic | nonsynonymous SNV   | ANGPT1:NM_001314051:exon4:c.G274A:p.A92T,ANGPT1:NM_0011146:exon5:c.G874A:p.A292T,ANGPT1:NM_001199859:exon5:c.G871A:p.A291T                                                                                                                                                                                                                                                                                                                                                                                                                                                                                                                 | 1.565 |          |          |                     | Fam71_f_m_aF         | 0/1;0/0;0/1         |
| chr8 | 117521031 | 117521031 | T    | A | MED30   | exonic | nonsynonymous SNV   | MED30:NM_001282986:exon1:c.T155A:p.F52Y,MED30:NM_001363182:exon1:c.T155A:p.F52Y,MED30:NM_080651:exon1:c.T155A:p.F52Y                                                                                                                                                                                                                                                                                                                                                                                                                                                                                                                       | 1.568 | 7.35E-05 | 9.83E-05 | 6.98E-06            | Fam75_f_m_aM         | 0/1;0/0;0/1         |
| chr8 | 119746847 | 119746847 | A    | C | TAF2    | exonic | nonsynonymous SNV   | TAF2:NM_0031384:exon23:c.T2966G:p.L989W                                                                                                                                                                                                                                                                                                                                                                                                                                                                                                                                                                                                    | 1.578 |          | 2.23E-05 | 1.40E-05            | Fam86_f_m_aF         | 0/0;0/1;0/1         |
| chr8 | 124372078 | 124372078 | C    | A | TMEM65  | exonic | nonsynonymous SNV   | TMEM65:NM_194291:exon1:c.G80T:p.R27L                                                                                                                                                                                                                                                                                                                                                                                                                                                                                                                                                                                                       | 1.079 | 8.13E-05 |          | 6.52E-05            | Fam44_f_m_aM_uF      | 0/0;0/1;0/1;0/1     |
| chr8 | 125044559 | 125044559 | A    | C | WASHC5  | exonic | nonsynonymous SNV   | WASHC5:NM_001330609:exon20:c.T2200G:p.F734V,WASHC5:NM_014846:exon21:c.T2644G:p.F882V                                                                                                                                                                                                                                                                                                                                                                                                                                                                                                                                                       | 1.015 | 7.34E-05 | 0.0006   | 1.40E-05            | Fam105_f_m_aM        | 0/0;0/1;0/1         |
| chr8 | 125436358 | 125436358 | C    | T | TRIB1   | exonic | nonsynonymous SNV   | TRIB1:NM_001282985:exon3:c.C508T:p.P1705,TRIB1:NM_025195:exon3:c.C1006T:p.P3365                                                                                                                                                                                                                                                                                                                                                                                                                                                                                                                                                            | 1.209 |          |          | 4.47E-05            | Fam21_f_m_aM_uM      | 0/0;0/1;0/1;0/0     |
| chr8 | 132140080 | 132140080 | C    | T | KCNQ3   | exonic | nonsynonymous SNV   | KCNQ3:NM_001204824:exon11:c.G1204A:p.V402I,KCNQ3:NM_004519:exon11:c.G1564A:p.V522I                                                                                                                                                                                                                                                                                                                                                                                                                                                                                                                                                         | 1.414 |          | 0.0001   | 3.49E-05            | Fam119_f_m_aM_aM     | 0/1;0/0;0/1;0/1     |
| chr8 | 132845831 | 132845831 | C    | T | PHF20L1 | exonic | nonsynonymous SNV   | PHF20L1:NM_001277196:exon20:c.C2884T:p.L962F,PHF20L1:NM_001362971:exon20:c.C2884T:p.L962F,PHF20L1:NM_016018:exon21:c.C2962T:p.L988F                                                                                                                                                                                                                                                                                                                                                                                                                                                                                                        | 1.015 | 7.35E-05 | 0.0001   | 4.89E-05            | Fam92_f_m_aM_raM     | 0/0;0/0;0/0;0/1     |
| chr8 | 134602650 | 134602650 | G    | A | ZFAT    | exonic | nonsynonymous SNV   | ZFAT:NM_001174157:exon5:c.C883T:p.R295C,ZFAT:NM_01167583:exon6:c.C1033T:p.R345C,ZFAT:NM_001174158:exon6:c.C1033T:p.R345C,ZFAT:NM_020863:exon6:c.C1069T:p.R357C,ZFAT:NM_001029939:exon7:c.C1033T:p.R345C,ZFAT:NM_001289394:exon7:c.C1033T:p.R345C                                                                                                                                                                                                                                                                                                                                                                                           | 1.064 | 0.0003   | 0.0003   | 0.0002              | Fam70_f_m_aM         | 0/1;0/0;0/1         |
| chr8 | 139618625 | 139618625 | T    | A | KCNK9   | exonic | nonsynonymous SNV   | KCNK9:NM_001282534:exon2:c.A758T:p.D253V                                                                                                                                                                                                                                                                                                                                                                                                                                                                                                                                                                                                   | 1.649 |          |          |                     | Fam107_f_m_aM        | 0/1;0/0;0/1         |
| chr8 | 140287691 | 140287691 | G    | A | TRAPPC9 | exonic | nonsynonymous SNV   | TRAPPC9:NM_001321646:exon12:c.C1871T:p.A624V,TRAPPC9:NM_001160372:exon13:c.C1898T:p.A633V,TRAPPC9:NM_031466:exon13:c.C2192T:p.A731V                                                                                                                                                                                                                                                                                                                                                                                                                                                                                                        | 1.401 | 0.0002   | 0.0005   | 0.0003              | Fam21_f_m_aM_uM      | 0/1;0/0;0/1;0/0     |
| chr8 | 140458294 | 140458294 | C    | T | TRAPPC9 | exonic | nonsynonymous SNV   | TRAPPC9:NM_031466:exon1:c.G271A:p.A91T                                                                                                                                                                                                                                                                                                                                                                                                                                                                                                                                                                                                     | 1.085 | 0.0001   | 0.0002   | 8.38E-05            | Fam80_f_m_aM_uM      | 0/0;0/1;0/1;0/0     |
| chr8 | 140557231 | 140557231 | G    | A | AGO2    | exonic | nonsynonymous SNV   | AGO2:NM_001164623:exon8:c.C884T:p.P295L,AGO2:NM_012154:exon8:c.C884T:p.P295L                                                                                                                                                                                                                                                                                                                                                                                                                                                                                                                                                               | 2.832 |          |          |                     | Fam84_f_m_aF         | 0/1;0/0;0/1         |
| chr8 | 141175412 | 141175412 | G    | A | DENND3  | exonic | nonsynonymous SNV   | DENND3:NM_001352890:exon14:c.G2488A:p.E830K,DENND3:NM_001362798:exon14:c.G2488A:p.E830K,DENND3:NM_014957:exon14:c.G2287A:p.E763K                                                                                                                                                                                                                                                                                                                                                                                                                                                                                                           | 1.285 | 0.0003   | 3.35E-05 | 1.40E-05            | Fam63_f_m_aF         | 0/0;0/1;0/1         |
| chr8 | 141427767 | 141427767 | C    | T | PTP4A3  | exonic | nonsynonymous SNV   | PTP4A3:NM_032611:exon5:c.C347T:p.A116V                                                                                                                                                                                                                                                                                                                                                                                                                                                                                                                                                                                                     | 1.52  |          | 0.0001   | 3.49E-05            | Fam100_f_m_aF        | 0/1;0/0;0/1         |
| chr8 | 142484668 | 142484668 | G    | A | ADGRB1  | exonic | nonsynonymous SNV   | ADGRB1:NM_001702:exon13:c.G2212A:p.A738T                                                                                                                                                                                                                                                                                                                                                                                                                                                                                                                                                                                                   | 1.644 |          | 0.0002   | 2.79E-05            | Fam75_f_m_aM         | 0/0;0/1;0/1         |
| chr8 | 142537021 | 142537021 | C    | A | ADGRB1  | exonic | nonsynonymous SNV   | ADGRB1:NM_001702:exon26:c.G3605C:p.R1202P                                                                                                                                                                                                                                                                                                                                                                                                                                                                                                                                                                                                  | 1.463 |          | 0.0001   | 0.0001              | Fam85_f_m_aM_aM      | 0/1;0/0;0/1;0/1     |
| chr8 | 143598730 | 143598730 | G    | T | TIGD5   | exonic | nonsynonymous SNV   | TIGD5:NM_032862:exon1:c.C827T:p.T276M                                                                                                                                                                                                                                                                                                                                                                                                                                                                                                                                                                                                      | 1.965 |          |          |                     | Fam24_f_m_aM_aM      | 0/0;0/1;0/1;0/1     |
| chr8 | 143598772 | 143598772 | A    | G | TIGD5   | exonic | nonsynonymous SNV   | TIGD5:NM_032862:exon1:c.A869G:p.K290R                                                                                                                                                                                                                                                                                                                                                                                                                                                                                                                                                                                                      | 1.721 |          | 3.47E-05 |                     | Fam92_f_m_aM_raM     | 0/1;0/0;0/0;0/1     |
| chr8 | 143727903 | 143727903 | G    | A | FAM83H  | exonic | nonsynonymous SNV   | FAM83H:NM_198488:exon5:c.C1558T:p.R520C                                                                                                                                                                                                                                                                                                                                                                                                                                                                                                                                                                                                    | 1.261 | 7.43E-05 |          |                     | Fam92_f_m_aM_raM     | 0/1;0/0;0/1;0/0     |
| chr8 | 143729085 | 143729085 | G    | A | FAM83H  | exonic | nonsynonymous SNV   | FAM83H:NM_198488:exon4:c.C619T:p.R207C                                                                                                                                                                                                                                                                                                                                                                                                                                                                                                                                                                                                     | 1.264 |          | 1.12E-05 |                     | Fam92_f_m_aM_raM     | 0/0;0/0;0/0;0/1     |

|      |           |           |   |    |          |        |                      |                                                                                                                                                                                                                                                                                                                                                                                                                                                                                                                                                                                                                                                                                                                                                                                                                                                                                                                                                                                                                                                                                                                      |       |          |          |          |                     |                     |                 |
|------|-----------|-----------|---|----|----------|--------|----------------------|----------------------------------------------------------------------------------------------------------------------------------------------------------------------------------------------------------------------------------------------------------------------------------------------------------------------------------------------------------------------------------------------------------------------------------------------------------------------------------------------------------------------------------------------------------------------------------------------------------------------------------------------------------------------------------------------------------------------------------------------------------------------------------------------------------------------------------------------------------------------------------------------------------------------------------------------------------------------------------------------------------------------------------------------------------------------------------------------------------------------|-------|----------|----------|----------|---------------------|---------------------|-----------------|
| chr8 | 143730237 | 143730237 | C | T  | FAM83H   | exonic | nonsynonymous SNV    | FAM83H:NM_198488:exon2:c.G346A:p.G116S                                                                                                                                                                                                                                                                                                                                                                                                                                                                                                                                                                                                                                                                                                                                                                                                                                                                                                                                                                                                                                                                               | 1.068 | 0.0003   | 0.0005   | 9.07E-05 | Fam115_f_m_aF_aM_aF | 0/1;0/0;0/0;0/1;0/0 |                 |
| chr8 | 143730461 | 143730461 | T | C  | FAM83H   | exonic | nonsynonymous SNV    | FAM83H:NM_198488:exon2:c.A122G:p.E41G<br>PUF60:NM_001271097:exon9:c.C1024T:p.P342S,PUF60:NM_001271096:exon10:c.C1108T:p.P370S,PUF60:NM_001271099:exon10:c.C1075T:p.P359S,PUF60:NM_001271100:exon10:c.C982T:p.P328S,PUF60:NM_014281:exon10:c.C1111T:p.P371S,PUF60:NM_001136033:exon11:c.C1033T:p.P345S,PUF60:NM_001271098:exon11:c.C1159T:p.P387S,PUF60:NM_001362897:exon11:c.C1222T:p.P408S,PUF60:NM_078480:exon11:c.C1162T:p.P388S,PUF60:NM_001362895:exon12:c.C1273T:p.P425S,PUF60:NM_001362896:exon12:c.C1273T:p.P425S                                                                                                                                                                                                                                                                                                                                                                                                                                                                                                                                                                                            | 1.142 | 7.34E-05 | 0.0006   | 0.0001   | Fam63_f_m_aF        | 0/0;0/1;0/1         |                 |
| chr8 | 143817128 | 143817128 | G | A  | PUF60    | exonic | nonsynonymous SNV    | PARP10:NM_001317895:exon9:c.C2705T:p.T902M,PARP10:NM_032789:exon10:c.C2669T:p.T890M                                                                                                                                                                                                                                                                                                                                                                                                                                                                                                                                                                                                                                                                                                                                                                                                                                                                                                                                                                                                                                  | 1.623 |          |          |          | Fam121_f_m_aF_aM    | 0/1;0/0;0/1;0/1     |                 |
| chr8 | 143977969 | 143977969 | G | A  | PARP10   | exonic | nonsynonymous SNV    | EXOSC4:NM_019037:exon3:c.G413C:p.C138S                                                                                                                                                                                                                                                                                                                                                                                                                                                                                                                                                                                                                                                                                                                                                                                                                                                                                                                                                                                                                                                                               | 1.667 |          | 4.84E-05 | 4.19E-05 | Fam38_f_m_aM        | 0/0;0/1;0/1         |                 |
| chr8 | 144080276 | 144080276 | G | C  | EXOSC4   | exonic | nonsynonymous SNV    | FBXL6:NM_012162:exon2:c.C466G:p.L156V,FBXL6:NM_024555:exon2:c.C466G:p.L156V                                                                                                                                                                                                                                                                                                                                                                                                                                                                                                                                                                                                                                                                                                                                                                                                                                                                                                                                                                                                                                          | 1.17  | 7.34E-05 | 6.17E-05 | 3.49E-05 | Fam10_f_m_aM_uF     | 0/0;0/1;0/1;0/0     |                 |
| chr8 | 144357737 | 144357737 | G | C  | FBXL6    | exonic | nonsynonymous SNV    | LRRC24:NM_001024678:exon5:c.T1409C:p.M470T                                                                                                                                                                                                                                                                                                                                                                                                                                                                                                                                                                                                                                                                                                                                                                                                                                                                                                                                                                                                                                                                           | 1.783 |          |          |          | Fam43_f_m_aM        | 0/0;0/1;0/1         |                 |
| chr8 | 144522608 | 144522608 | A | G  | LRRC24   | exonic | nonsynonymous SNV    | LRRC24:NM_001024678:exon5:c.C1250T:p.T417M                                                                                                                                                                                                                                                                                                                                                                                                                                                                                                                                                                                                                                                                                                                                                                                                                                                                                                                                                                                                                                                                           | 1.152 |          | 0.0001   | 6.99E-06 | Fam24_f_m_aM_aM     | 0/0;0/1;0/1;0/1     |                 |
| chr8 | 144522767 | 144522767 | G | A  | LRRC24   | exonic | nonsynonymous SNV    | ARHGAP39:NM_025251:exon5:c.C2075T:p.T692M,ARHGAP39:NM_001308208:exon6:c.C2075T:p.T692M,ARHGAP39:NM_001308207:exon7:c.C2075T:p.T692M                                                                                                                                                                                                                                                                                                                                                                                                                                                                                                                                                                                                                                                                                                                                                                                                                                                                                                                                                                                  | 1.092 |          |          |          | Fam49_f_m_aM        | 0/0;0/1;0/1         |                 |
| chr8 | 144523343 | 144523343 | C | A  | LRRC24   | exonic | nonsynonymous SNV    | ZNF517:NM_001317936:exon5:c.G1351T:p.G451W,ZNF517:NM_213605:exon5:c.G1372T:p.G458W                                                                                                                                                                                                                                                                                                                                                                                                                                                                                                                                                                                                                                                                                                                                                                                                                                                                                                                                                                                                                                   | 1.197 |          | 6.68E-05 | 1.40E-05 | Fam95_f_m_aM_aM_uF  | 0/1;0/0;0/1;0/1;0/0 |                 |
| chr8 | 144545695 | 144545695 | G | A  | ARHGAP39 | exonic | nonsynonymous SNV    | SMARCA2:NM_001289396:exon20:c.A2956G:p.I986V,SMARCA2:NM_001289397:exon20:c.A2782G:p.I928V,SMARCA2:NM_003070:exon20:c.A2956G:p.I986V,SMARCA2:NM_139045:exon20:c.A2956G:p.I986V                                                                                                                                                                                                                                                                                                                                                                                                                                                                                                                                                                                                                                                                                                                                                                                                                                                                                                                                        | 1.042 | 7.35E-05 | 9.84E-05 | 9.07E-05 | Fam28_f_m_aF_uF     | 0/0;0/1;0/1;0/1     |                 |
| chr8 | 144808288 | 144808288 | G | T  | ZNF517   | exonic | nonsynonymous SNV    | RFX3:NM_002919:exon14:c.C1879T:p.R627C,RFX3:NM_01282116:exon15:c.C1879T:p.R627C,RFX3:NM_134428:exon16:c.C1879T:p.R627C                                                                                                                                                                                                                                                                                                                                                                                                                                                                                                                                                                                                                                                                                                                                                                                                                                                                                                                                                                                               | 1.027 |          | 0.0001   | 2.79E-05 | Fam73_f_m_aF_dM     | 0/0;0/1;0/1;0/0     |                 |
| chr9 | 2096729   | 2096729   | A | G  | SMARCA2  | exonic | nonsynonymous SNV    | RFX3:NM_002919:exon14:c.C1879T:p.R627C,RFX3:NM_01282116:exon15:c.C1879T:p.R627C,RFX3:NM_134428:exon16:c.C1879T:p.R627C                                                                                                                                                                                                                                                                                                                                                                                                                                                                                                                                                                                                                                                                                                                                                                                                                                                                                                                                                                                               | 1.272 |          |          |          | Fam11_f_m_aM_uM     | 0/0;0/1;0/1;0/1     |                 |
| chr9 | 3248121   | 3248121   | G | A  | RFX3     | exonic | nonsynonymous SNV    | KIAA2026:NM_001017969:exon1:c.G22T:p.G8X                                                                                                                                                                                                                                                                                                                                                                                                                                                                                                                                                                                                                                                                                                                                                                                                                                                                                                                                                                                                                                                                             | 2.832 |          |          |          | Fam7_f_m_aM_aM_uM   | 0/1;0/0;0/1;0/1;0/0 |                 |
| chr9 | 6007766   | 6007766   | C | A  | KIAA2026 | exonic | stopgain             | NFIB:NM_001282787:exon6:c.T173C:p.M58T,NFIB:NM_001369477:exon6:c.T875C:p.M292T,NFIB:NM_001369479:exon6:c.T392C:p.M131T,NFIB:NM_001369480:exon6:c.T392C:p.M131T,NFIB:NM_001190737:exon7:c.T929C:p.M310T,NFIB:NM_001190738:exon7:c.T1007C:p.M336T,NFIB:NM_001369458:exon7:c.T995C:p.M332T,NFIB:NM_001369459:exon7:c.T995C:p.M332T,NFIB:NM_001369460:exon7:c.T917C:p.M306T,NFIB:NM_001369461:exon7:c.T929C:p.M310T,NFIB:NM_001369462:exon7:c.T995C:p.M332T,NFIB:NM_001369463:exon7:c.T917C:p.M306T,NFIB:NM_001369464:exon7:c.T929C:p.M310T,NFIB:NM_001369465:exon7:c.T902C:p.M301T,NFIB:NM_001369466:exon7:c.T917C:p.M306T,NFIB:NM_001369467:exon7:c.T902C:p.M301T,NFIB:NM_001369468:exon7:c.T995C:p.M332T,NFIB:NM_001369469:exon7:c.T785C:p.M262T,NFIB:NM_001369470:exon7:c.T692C:p.M231T,NFIB:NM_001369471:exon7:c.T929C:p.M310T,NFIB:NM_001369472:exon7:c.T917C:p.M306T,NFIB:NM_001369473:exon7:c.T917C:p.M306T,NFIB:NM_001369474:exon7:c.T914C:p.M305T,NFIB:NM_001369475:exon7:c.T704C:p.M235T,NFIB:NM_001369476:exon7:c.T902C:p.M301T,NFIB:NM_001369478:exon7:c.T692C:p.M231T,NFIB:NM_005596:exon7:c.T929C:p.M310T | 0.563 | 0.0005   | 0.0008   | 0.0004   | Fam62_f_m_aM_aM     | 0/1;0/0;0/1;0/1     |                 |
| chr9 | 14125763  | 14125763  | A | G  | NFIB     | exonic | nonsynonymous SNV    | BNC2:NM_001317939:exon3:c.G238A:p.E80K,BNC2:NM_01317940:exon3:c.G79A:p.E27K,BNC2:NM_017637:exon4:c.G364A:p.E122K                                                                                                                                                                                                                                                                                                                                                                                                                                                                                                                                                                                                                                                                                                                                                                                                                                                                                                                                                                                                     | 2.067 |          |          |          | Fam82_f_m_aM_uF     | 0/1;0/0;0/1;0/0     |                 |
| chr9 | 16583052  | 16583052  | C | T  | BNC2     | exonic | nonsynonymous SNV    | KLHL9:NM_018847:exon1:c.G1673A:p.R558H                                                                                                                                                                                                                                                                                                                                                                                                                                                                                                                                                                                                                                                                                                                                                                                                                                                                                                                                                                                                                                                                               | 1.7   | 7.35E-05 |          | 1.40E-05 | Fam48_f_m_aM_uM     | 0/0;0/1;0/1;0/0     |                 |
| chr9 | 21333187  | 21333187  | C | T  | KLHL9    | exonic | nonsynonymous SNV    | TUSC1:NM_001004125:exon1:c.A211T:p.S71C                                                                                                                                                                                                                                                                                                                                                                                                                                                                                                                                                                                                                                                                                                                                                                                                                                                                                                                                                                                                                                                                              | 1.418 | 7.34E-05 | 3.27E-05 | 6.98E-06 | Fam119_f_m_aM_aM    | 0/0;0/1;0/1;0/1     |                 |
| chr9 | 25678111  | 25678111  | T | A  | TUSC1    | exonic | nonsynonymous SNV    | MOB3B:NM_024761:exon2:c.T62C:p.F21S                                                                                                                                                                                                                                                                                                                                                                                                                                                                                                                                                                                                                                                                                                                                                                                                                                                                                                                                                                                                                                                                                  | 1.557 |          |          |          | Fam105_f_m_aM       | 0/1;0/0;0/1         |                 |
| chr9 | 27455489  | 27455489  | A | G  | MOB3B    | exonic | nonsynonymous SNV    | TAF1L:NM_153809:exon1:c.1730_1731insCA:p.Q577Hfs*5                                                                                                                                                                                                                                                                                                                                                                                                                                                                                                                                                                                                                                                                                                                                                                                                                                                                                                                                                                                                                                                                   | 1.563 |          | 3.27E-05 |          | Fam72_f_m_aF_uF     | 0/1;0/0;0/1;0/0     |                 |
| chr9 | 32633849  | 32633849  | - | TG | TAF1L    | exonic | frameshift insertion | MYORG:NM_020702:exon2:c.G1870A:p.G624S                                                                                                                                                                                                                                                                                                                                                                                                                                                                                                                                                                                                                                                                                                                                                                                                                                                                                                                                                                                                                                                                               | 0.308 |          |          |          | Fam91_m_aM_dM_aM_dM | 0/0;0/1;0/0;0/1;0/0 |                 |
| chr9 | 34371074  | 34371074  | C | T  | MYORG    | exonic | nonsynonymous SNV    | MYORG:NM_020702:exon2:c.C1538T:p.S513F                                                                                                                                                                                                                                                                                                                                                                                                                                                                                                                                                                                                                                                                                                                                                                                                                                                                                                                                                                                                                                                                               | 1.219 | 0.0004   | 0.0002   | 0.0001   | Fam23_f_m_aM_dF_uFs | 0/1;0/0;0/1;0/1;0/0 |                 |
| chr9 | 34371406  | 34371406  | G | A  | MYORG    | exonic | nonsynonymous SNV    | RPP25L:NM_148178:exon2:c.G263C:p.R88P,RPP25L:NM_148179:exon2:c.G263C:p.R88P                                                                                                                                                                                                                                                                                                                                                                                                                                                                                                                                                                                                                                                                                                                                                                                                                                                                                                                                                                                                                                          | 1.53  |          |          |          | Fam71_f_m_aF        | 0/1;0/0;0/1         |                 |
| chr9 | 34611034  | 34611034  | C | G  | RPP25L   | exonic | nonsynonymous SNV    | PHF24:NM_001304333:exon3:c.C481T:p.R161C,PHF24:NM_001347982:exon3:c.C481T:p.R161C,PHF24:NM_001347983:exon3:c.C481T:p.R161C,PHF24:NM_015297:exon3:c.C481T:p.R161C                                                                                                                                                                                                                                                                                                                                                                                                                                                                                                                                                                                                                                                                                                                                                                                                                                                                                                                                                     | 1.043 |          |          |          | Fam112_f_m_aM       | 0/1;0/0;0/1         |                 |
| chr9 | 34972448  | 34972448  | C | T  | PHF24    | exonic | nonsynonymous SNV    | DNAJB5:NM_001135004:exon1:c.G62T:p.R21L,DNAJB5:NM_001349725:exon1:c.G62T:p.R21L                                                                                                                                                                                                                                                                                                                                                                                                                                                                                                                                                                                                                                                                                                                                                                                                                                                                                                                                                                                                                                      | 1.357 |          | 0.0003   | 1.12E-05 | 6.98E-06            | Fam24_f_m_aM_aM     | 0/0;0/1;0/1;0/1 |
| chr9 | 34989730  | 34989730  | G | T  | DNAJB5   | exonic | nonsynonymous SNV    | DNAJB5:NM_001135004:exon1:c.C142T:p.R48W,DNAJB5:NM_001349725:exon1:c.C142T:p.R48W                                                                                                                                                                                                                                                                                                                                                                                                                                                                                                                                                                                                                                                                                                                                                                                                                                                                                                                                                                                                                                    | 1.221 | 0.0006   |          | 0.0002   | Fam107_f_m_aM       | 0/0;0/1;0/1         |                 |
| chr9 | 34989810  | 34989810  | C | T  | DNAJB5   | exonic | nonsynonymous SNV    | ARHGEF39:NM_032818:exon4:c.G410A:p.R137H                                                                                                                                                                                                                                                                                                                                                                                                                                                                                                                                                                                                                                                                                                                                                                                                                                                                                                                                                                                                                                                                             | 1.037 |          |          |          | Fam56_f_m_aF_aM     | 0/0;0/1;0/1;0/0     |                 |
| chr9 | 35664071  | 35664071  | C | T  | ARHGEF39 | exonic | nonsynonymous SNV    |                                                                                                                                                                                                                                                                                                                                                                                                                                                                                                                                                                                                                                                                                                                                                                                                                                                                                                                                                                                                                                                                                                                      | 1.05  |          | 1.12E-05 | 6.98E-06 | Fam63_f_m_aF        | 0/1;0/0;0/1         |                 |

|      |          |          |   |   |         |        |                   |                                                                                                                                                                                                                                                                                                                                                                                                                                                                                                                                                                                                                                                                                                                                                                                                                                                                                                                                                                                                                                                                                                                                                                                                                                                                                                                                                                                                                                                                                                                                                                                                                                                                                                                                                                                                                                                                                                                                                                                                                                                                                                                                                                                                                                                                                                                                                                                                                                                                                                                                                                                                                                                                                                                                                                                                                         |       |          |          |          |                     |                     |
|------|----------|----------|---|---|---------|--------|-------------------|-------------------------------------------------------------------------------------------------------------------------------------------------------------------------------------------------------------------------------------------------------------------------------------------------------------------------------------------------------------------------------------------------------------------------------------------------------------------------------------------------------------------------------------------------------------------------------------------------------------------------------------------------------------------------------------------------------------------------------------------------------------------------------------------------------------------------------------------------------------------------------------------------------------------------------------------------------------------------------------------------------------------------------------------------------------------------------------------------------------------------------------------------------------------------------------------------------------------------------------------------------------------------------------------------------------------------------------------------------------------------------------------------------------------------------------------------------------------------------------------------------------------------------------------------------------------------------------------------------------------------------------------------------------------------------------------------------------------------------------------------------------------------------------------------------------------------------------------------------------------------------------------------------------------------------------------------------------------------------------------------------------------------------------------------------------------------------------------------------------------------------------------------------------------------------------------------------------------------------------------------------------------------------------------------------------------------------------------------------------------------------------------------------------------------------------------------------------------------------------------------------------------------------------------------------------------------------------------------------------------------------------------------------------------------------------------------------------------------------------------------------------------------------------------------------------------------|-------|----------|----------|----------|---------------------|---------------------|
| chr9 | 35706003 | 35706003 | C | T | TLN1    | exonic | nonsynonymous SNV | TLN1:NM_006289:exon41:c.G5470A:p.V1824M                                                                                                                                                                                                                                                                                                                                                                                                                                                                                                                                                                                                                                                                                                                                                                                                                                                                                                                                                                                                                                                                                                                                                                                                                                                                                                                                                                                                                                                                                                                                                                                                                                                                                                                                                                                                                                                                                                                                                                                                                                                                                                                                                                                                                                                                                                                                                                                                                                                                                                                                                                                                                                                                                                                                                                                 | 1.415 | 7.35E-05 | 1.12E-05 | 1.40E-05 | Fam76_f_m_aM_uM     | 0/1;0/0;0/1;0/1     |
| chr9 | 35808527 | 35808527 | G | A | NPR2    | exonic | nonsynonymous SNV | NPR2:NM_003995:exon19:c.G2731A:p.A911T<br>GNE:NM_001190384:exon7:c.A1196G:p.H399R,GNE:NM_001190388:exon8:c.A1511G:p.H504R,GNE:NM_001128227:exon9:c.A1619G:p.H540R,GNE:NM_005476:exon9:c.A1526G:p.H509R                                                                                                                                                                                                                                                                                                                                                                                                                                                                                                                                                                                                                                                                                                                                                                                                                                                                                                                                                                                                                                                                                                                                                                                                                                                                                                                                                                                                                                                                                                                                                                                                                                                                                                                                                                                                                                                                                                                                                                                                                                                                                                                                                                                                                                                                                                                                                                                                                                                                                                                                                                                                                  | 1.72  | 7.35E-05 | 1.12E-05 | 2.79E-05 | Fam105_f_m_aM       | 0/1;0/0;0/1         |
| chr9 | 36222884 | 36222884 | T | C | GNE     | exonic | nonsynonymous SNV |                                                                                                                                                                                                                                                                                                                                                                                                                                                                                                                                                                                                                                                                                                                                                                                                                                                                                                                                                                                                                                                                                                                                                                                                                                                                                                                                                                                                                                                                                                                                                                                                                                                                                                                                                                                                                                                                                                                                                                                                                                                                                                                                                                                                                                                                                                                                                                                                                                                                                                                                                                                                                                                                                                                                                                                                                         | 1.004 |          | 1.12E-05 |          | Fam16_f_m_aM_aM     | 0/0;0/1;0/0;0/1     |
| chr9 | 37426623 | 37426623 | C | T | GRHPR   | exonic | nonsynonymous SNV | GRHPR:NM_012203:exon4:c.C373T:p.R125W                                                                                                                                                                                                                                                                                                                                                                                                                                                                                                                                                                                                                                                                                                                                                                                                                                                                                                                                                                                                                                                                                                                                                                                                                                                                                                                                                                                                                                                                                                                                                                                                                                                                                                                                                                                                                                                                                                                                                                                                                                                                                                                                                                                                                                                                                                                                                                                                                                                                                                                                                                                                                                                                                                                                                                                   | 1.217 |          | 3.27E-05 |          | Fam74_f_m_aM_uM     | 0/0;0/1;0/1;0/0     |
| chr9 | 37426624 | 37426624 | G | A | GRHPR   | exonic | nonsynonymous SNV | GRHPR:NM_012203:exon4:c.G374A:p.R125Q                                                                                                                                                                                                                                                                                                                                                                                                                                                                                                                                                                                                                                                                                                                                                                                                                                                                                                                                                                                                                                                                                                                                                                                                                                                                                                                                                                                                                                                                                                                                                                                                                                                                                                                                                                                                                                                                                                                                                                                                                                                                                                                                                                                                                                                                                                                                                                                                                                                                                                                                                                                                                                                                                                                                                                                   | 1.236 | 0.0006   | 0.0007   | 0.0002   | Fam51_f_m_aM_uF     | 0/0;0/1;0/1;0/1     |
| chr9 | 37521571 | 37521571 | C | T | FBXO10  | exonic | nonsynonymous SNV | FBXO10:NM_012166:exon8:c.G2198A:p.G733E                                                                                                                                                                                                                                                                                                                                                                                                                                                                                                                                                                                                                                                                                                                                                                                                                                                                                                                                                                                                                                                                                                                                                                                                                                                                                                                                                                                                                                                                                                                                                                                                                                                                                                                                                                                                                                                                                                                                                                                                                                                                                                                                                                                                                                                                                                                                                                                                                                                                                                                                                                                                                                                                                                                                                                                 | 1.148 |          | 4.59E-05 | 2.09E-05 | Fam12_f_m_aM_uM_aM  | 0/1;0/0;0/0;0/0;0/1 |
| chr9 | 37537201 | 37537201 | C | T | FBXO10  | exonic | nonsynonymous SNV | FBXO10:NM_012166:exon3:c.G1328A:p.G443D                                                                                                                                                                                                                                                                                                                                                                                                                                                                                                                                                                                                                                                                                                                                                                                                                                                                                                                                                                                                                                                                                                                                                                                                                                                                                                                                                                                                                                                                                                                                                                                                                                                                                                                                                                                                                                                                                                                                                                                                                                                                                                                                                                                                                                                                                                                                                                                                                                                                                                                                                                                                                                                                                                                                                                                 | 1.153 |          |          |          | Fam79_f_m_aM_uM     | 0/0;0/1;0/1;0/0     |
| chr9 | 68822643 | 68822643 | C | A | PIP5K1B | exonic | nonsynonymous SNV | PIP5K1B:NM_001278253:exon3:c.C29A:p.A10E,PIP5K1B:NM_003558:exon4:c.C29A:p.A10E                                                                                                                                                                                                                                                                                                                                                                                                                                                                                                                                                                                                                                                                                                                                                                                                                                                                                                                                                                                                                                                                                                                                                                                                                                                                                                                                                                                                                                                                                                                                                                                                                                                                                                                                                                                                                                                                                                                                                                                                                                                                                                                                                                                                                                                                                                                                                                                                                                                                                                                                                                                                                                                                                                                                          | 1.118 | 0.0003   | 0.0002   | 9.08E-05 | Fam82_f_m_aM_uF     | 0/1;0/0;0/1;0/0     |
| chr9 | 69467936 | 69467936 | C | T | APBA1   | exonic | nonsynonymous SNV | APBA1:NM_001163:exon5:c.G1369A:p.D457N                                                                                                                                                                                                                                                                                                                                                                                                                                                                                                                                                                                                                                                                                                                                                                                                                                                                                                                                                                                                                                                                                                                                                                                                                                                                                                                                                                                                                                                                                                                                                                                                                                                                                                                                                                                                                                                                                                                                                                                                                                                                                                                                                                                                                                                                                                                                                                                                                                                                                                                                                                                                                                                                                                                                                                                  | 1.056 | 0.0006   | 0.0002   | 5.59E-05 | Fam121_f_m_aF_aM    | 0/0;0/1;0/1;0/1     |
| chr9 | 70412987 | 70412987 | A | T | KLF9    | exonic | nonsynonymous SNV | KLF9:NM_001206:exon1:c.T377A:p.L126H                                                                                                                                                                                                                                                                                                                                                                                                                                                                                                                                                                                                                                                                                                                                                                                                                                                                                                                                                                                                                                                                                                                                                                                                                                                                                                                                                                                                                                                                                                                                                                                                                                                                                                                                                                                                                                                                                                                                                                                                                                                                                                                                                                                                                                                                                                                                                                                                                                                                                                                                                                                                                                                                                                                                                                                    | 1.998 |          |          |          | Fam115_f_m_aF_aM_aF | 0/1;0/0;0/0;0/1;0/0 |
| chr9 | 70413015 | 70413015 | G | C | KLF9    | exonic | nonsynonymous SNV | KLF9:NM_001206:exon1:c.C349G:p.P117A                                                                                                                                                                                                                                                                                                                                                                                                                                                                                                                                                                                                                                                                                                                                                                                                                                                                                                                                                                                                                                                                                                                                                                                                                                                                                                                                                                                                                                                                                                                                                                                                                                                                                                                                                                                                                                                                                                                                                                                                                                                                                                                                                                                                                                                                                                                                                                                                                                                                                                                                                                                                                                                                                                                                                                                    | 1.132 |          | 7.46E-05 |          | Fam85_f_m_aM_aM     | 0/0;0/1;0/0;0/1     |
| chr9 | 70603386 | 70603386 | C | T | TRPM3   | exonic | nonsynonymous SNV | TRPM3:NM_001366150:exon18:c.G2686A:p.V896I,TRPM3:NM_206944:exon18:c.G2227A:p.V743I,TRPM3:NM_001007471:exon19:c.G2716A:p.V906I,TRPM3:NM_001366143:exon19:c.G2722A:p.V908I,TRPM3:NM_001366143:exon19:c.G2722A:p.V908I,TRPM3:NM_001366149:exon19:c.G2722A:p.V908I,TRPM3:NM_001366151:exon19:c.G2716A:p.V906I,TRPM3:NM_020952:exon19:c.G2257A:p.V753I,TRPM3:NM_206945:exon19:c.G2263A:p.V755I,TRPM3:NM_206947:exon19:c.G2302A:p.V768I,TRPM3:NM_001366142:exon20:c.G2758A:p.V920I,TRPM3:NM_001366145:exon20:c.G2752A:p.V918I,TRPM3:NM_001366146:exon20:c.G2752A:p.V918I,TRPM3:NM_001366148:exon20:c.G2797A:p.V933I,TRPM3:NM_001366154:exon20:c.G2293A:p.V765I,TRPM3:NM_024971:exon20:c.G2293A:p.V765I,TRPM3:NM_206946:exon20:c.G2332A:p.V778I,TRPM3:NM_001366147:exon21:c.G2827A:p.V943I,TRPM3:NM_001366152:exon21:c.G2827A:p.V943I<br>GDA:NM_001242505:exon7:c.C637T:p.R213C,GDA:NM_001242507:exon7:c.C415T:p.R139C,GDA:NM_001351571:exon7:c.C511T:p.R171C,GDA:NM_001351572:exon7:c.C637T:p.R213C,GDA:NM_001351573:exon7:c.C637T:p.R213C,GDA:NM_004293:exon7:c.C637T:p.R213C,GDA:NM_001242506:exon8:c.C415T:p.R139C<br>ROR8:NM_001365023:exon4:c.G356A:p.R119Q,ROR8:NM_006914:exon4:c.G323A:p.R108Q<br>AGTPBP1:NM_001286715:exon17:c.G2544C:p.W848C,AGTPBP1:NM_001286717:exon17:c.G2424C:p.W808C,AGTPBP1:NM_001330701:exon18:c.G2388C:p.W796C,AGTPBP1:NM_015239:exon18:c.G2268C:p.W756C<br>AGTPBP1:NM_001286715:exon14:c.T2222C:p.I741T,AGTPBP1:NM_001286717:exon14:c.T2102C:p.I701T,AGTPBP1:NM_001330701:exon15:c.T2066C:p.I689T,AGTPBP1:NM_015239:exon15:c.T1946C:p.I649T<br>NAA35:NM_001321881:exon20:c.G1798A:p.G600S,NAA35:NM_001321882:exon20:c.G1798A:p.G600S,NAA35:NM_024635:exon20:c.G1798A:p.G600S<br>DAPK1:NM_001288729:exon26:c.G3518T:p.G1173V,DAPK1:NM_001288730:exon26:c.G3518T:p.G1173V,DAPK1:NM_001288731:exon26:c.G3518T:p.G1173V,DAPK1:NM_004938:exon26:c.G3518T:p.G1173V<br>S1PR3:NM_005226:exon2:c.C919T:p.R307W<br>OGN:NM_014057:exon5:c.A451C:p.T151P,OGN:NM_024416:exon5:c.A625C:p.T209P,OGN:NM_033014:exon5:c.A451C:p.T151P<br>FGD3:NM_001083536:exon7:c.C863T:p.T288M,FGD3:NM_001286993:exon7:c.C863T:p.T288M,FGD3:NM_001369951:exon7:c.C863T:p.T288M,FGD3:NM_001369952:exon7:c.C863T:p.T288M,FGD3:NM_033086:exon7:c.C863T:p.T288M<br>SUSD3:NM_001287006:exon2:c.C113T:p.P38L,SUSD3:NM_145006:exon2:c.C113T:p.P38L,SUSD3:NM_001287005:exon3:c.C74T:p.P25L<br>FBP1:NM_000507:exon3:c.G335T:p.G112V,FBP1:NM_001127628:exon4:c.G335T:p.G112V<br>PTCH1:NM_001354918:exon15:c.G2479A:p.D827N,PTCH1:NM_000264:exon16:c.G2635A:p.D879N,PTCH1:NM_001083602:exon16:c.G2437A:p.D813N,PTCH1:NM_001083603:exon16:c.G2632A:p.D878N,PTCH1:NM_001083604:exon16:c.G2182A:p.D728N,PTCH1:NM_001083605:exon16:c.G2182A:p.D728N,PTCH1:NM_001083606:exon16:c.G2182A:p.D728N,PTCH1:NM_001083607:exon16:c.G2182A:p.D728N | 1.706 | 0.0003   | 0.0004   | 2.79E-05 | Fam99_f_m_aM_aM     | 0/0;0/1;0/1;0/1     |
| chr9 | 72223150 | 72223150 | C | T | GDA     | exonic | nonsynonymous SNV |                                                                                                                                                                                                                                                                                                                                                                                                                                                                                                                                                                                                                                                                                                                                                                                                                                                                                                                                                                                                                                                                                                                                                                                                                                                                                                                                                                                                                                                                                                                                                                                                                                                                                                                                                                                                                                                                                                                                                                                                                                                                                                                                                                                                                                                                                                                                                                                                                                                                                                                                                                                                                                                                                                                                                                                                                         | 1.342 | 7.34E-05 | 0.0002   | 5.58E-05 | Fam16_f_m_aM_aM     | 0/0;0/1;0/1;0/0     |
| chr9 | 74642501 | 74642501 | G | A | RORB    | exonic | nonsynonymous SNV |                                                                                                                                                                                                                                                                                                                                                                                                                                                                                                                                                                                                                                                                                                                                                                                                                                                                                                                                                                                                                                                                                                                                                                                                                                                                                                                                                                                                                                                                                                                                                                                                                                                                                                                                                                                                                                                                                                                                                                                                                                                                                                                                                                                                                                                                                                                                                                                                                                                                                                                                                                                                                                                                                                                                                                                                                         | 1.734 | 7.34E-05 | 4.58E-05 | 4.19E-05 | Fam54_f_m_aM_uF     | 0/0;0/1;0/1;0/0     |
| chr9 | 85596397 | 85596397 | C | G | AGTPBP1 | exonic | nonsynonymous SNV |                                                                                                                                                                                                                                                                                                                                                                                                                                                                                                                                                                                                                                                                                                                                                                                                                                                                                                                                                                                                                                                                                                                                                                                                                                                                                                                                                                                                                                                                                                                                                                                                                                                                                                                                                                                                                                                                                                                                                                                                                                                                                                                                                                                                                                                                                                                                                                                                                                                                                                                                                                                                                                                                                                                                                                                                                         | 1.078 |          | 1.12E-05 |          | Fam65_f_m_aM_uF_dF  | 0/0;0/1;0/1;0/1;0/1 |
| chr9 | 85621235 | 85621235 | A | G | AGTPBP1 | exonic | nonsynonymous SNV |                                                                                                                                                                                                                                                                                                                                                                                                                                                                                                                                                                                                                                                                                                                                                                                                                                                                                                                                                                                                                                                                                                                                                                                                                                                                                                                                                                                                                                                                                                                                                                                                                                                                                                                                                                                                                                                                                                                                                                                                                                                                                                                                                                                                                                                                                                                                                                                                                                                                                                                                                                                                                                                                                                                                                                                                                         | 1.281 |          | 5.31E-05 | 4.19E-05 | Fam103_f_m_aM       | 0/0;0/1;0/1         |
| chr9 | 86018279 | 86018279 | G | A | NAA35   | exonic | nonsynonymous SNV |                                                                                                                                                                                                                                                                                                                                                                                                                                                                                                                                                                                                                                                                                                                                                                                                                                                                                                                                                                                                                                                                                                                                                                                                                                                                                                                                                                                                                                                                                                                                                                                                                                                                                                                                                                                                                                                                                                                                                                                                                                                                                                                                                                                                                                                                                                                                                                                                                                                                                                                                                                                                                                                                                                                                                                                                                         | 1.238 |          | 9.83E-05 |          | Fam118_f_m_aM_aF_uM | 0/1;0/0;0/0;0/1;0/0 |
| chr9 | 87706589 | 87706589 | G | T | DAPK1   | exonic | nonsynonymous SNV |                                                                                                                                                                                                                                                                                                                                                                                                                                                                                                                                                                                                                                                                                                                                                                                                                                                                                                                                                                                                                                                                                                                                                                                                                                                                                                                                                                                                                                                                                                                                                                                                                                                                                                                                                                                                                                                                                                                                                                                                                                                                                                                                                                                                                                                                                                                                                                                                                                                                                                                                                                                                                                                                                                                                                                                                                         | 1.302 |          | 3.27E-05 |          | Fam97_f_m_aM_aF     | 0/1;0/0;0/1;0/1     |
| chr9 | 89002119 | 89002119 | C | T | S1PR3   | exonic | nonsynonymous SNV |                                                                                                                                                                                                                                                                                                                                                                                                                                                                                                                                                                                                                                                                                                                                                                                                                                                                                                                                                                                                                                                                                                                                                                                                                                                                                                                                                                                                                                                                                                                                                                                                                                                                                                                                                                                                                                                                                                                                                                                                                                                                                                                                                                                                                                                                                                                                                                                                                                                                                                                                                                                                                                                                                                                                                                                                                         | 1.133 | 7.35E-05 | 8.96E-05 | 3.49E-05 | Fam65_f_m_aM_uF_dF  | 0/1;0/0;0/1;0/0;0/1 |
| chr9 | 92390033 | 92390033 | T | G | OGN     | exonic | nonsynonymous SNV |                                                                                                                                                                                                                                                                                                                                                                                                                                                                                                                                                                                                                                                                                                                                                                                                                                                                                                                                                                                                                                                                                                                                                                                                                                                                                                                                                                                                                                                                                                                                                                                                                                                                                                                                                                                                                                                                                                                                                                                                                                                                                                                                                                                                                                                                                                                                                                                                                                                                                                                                                                                                                                                                                                                                                                                                                         | 1.162 |          |          |          | Fam48_f_m_aM_uM     | 0/1;0/0;0/1;0/0     |
| chr9 | 93010271 | 93010271 | C | T | FGD3    | exonic | nonsynonymous SNV |                                                                                                                                                                                                                                                                                                                                                                                                                                                                                                                                                                                                                                                                                                                                                                                                                                                                                                                                                                                                                                                                                                                                                                                                                                                                                                                                                                                                                                                                                                                                                                                                                                                                                                                                                                                                                                                                                                                                                                                                                                                                                                                                                                                                                                                                                                                                                                                                                                                                                                                                                                                                                                                                                                                                                                                                                         | 1.021 | 0.0006   | 7.73E-05 | 2.79E-05 | Fam94_f_m_aM        | 0/1;0/0;0/1         |
| chr9 | 93075808 | 93075808 | C | T | SUSD3   | exonic | nonsynonymous SNV |                                                                                                                                                                                                                                                                                                                                                                                                                                                                                                                                                                                                                                                                                                                                                                                                                                                                                                                                                                                                                                                                                                                                                                                                                                                                                                                                                                                                                                                                                                                                                                                                                                                                                                                                                                                                                                                                                                                                                                                                                                                                                                                                                                                                                                                                                                                                                                                                                                                                                                                                                                                                                                                                                                                                                                                                                         | 1.252 |          |          |          | Fam89_f_m_aM        | 0/0;0/1;0/1         |
| chr9 | 94617859 | 94617859 | C | A | FBP1    | exonic | nonsynonymous SNV |                                                                                                                                                                                                                                                                                                                                                                                                                                                                                                                                                                                                                                                                                                                                                                                                                                                                                                                                                                                                                                                                                                                                                                                                                                                                                                                                                                                                                                                                                                                                                                                                                                                                                                                                                                                                                                                                                                                                                                                                                                                                                                                                                                                                                                                                                                                                                                                                                                                                                                                                                                                                                                                                                                                                                                                                                         | 1.12  |          |          |          | Fam39_f_m_aM        | 0/0;0/1;0/1         |
| chr9 | 95461924 | 95461924 | C | T | PTCH1   | exonic | nonsynonymous SNV |                                                                                                                                                                                                                                                                                                                                                                                                                                                                                                                                                                                                                                                                                                                                                                                                                                                                                                                                                                                                                                                                                                                                                                                                                                                                                                                                                                                                                                                                                                                                                                                                                                                                                                                                                                                                                                                                                                                                                                                                                                                                                                                                                                                                                                                                                                                                                                                                                                                                                                                                                                                                                                                                                                                                                                                                                         | 1.459 | 7.34E-05 | 0.0001   | 4.19E-05 | Fam16_f_m_aM_aM     | 0/1;0/0;0/0;0/1     |

|      |           |           |   |   |                |        |                   |                                                                                                                                                                                                                                                                                                                                                                                                                                                                                                                                                                                                                                                                                                                                                                                                                                                                                                                                                                                                                                                                          |       |          |          |          |                      |                     |                 |
|------|-----------|-----------|---|---|----------------|--------|-------------------|--------------------------------------------------------------------------------------------------------------------------------------------------------------------------------------------------------------------------------------------------------------------------------------------------------------------------------------------------------------------------------------------------------------------------------------------------------------------------------------------------------------------------------------------------------------------------------------------------------------------------------------------------------------------------------------------------------------------------------------------------------------------------------------------------------------------------------------------------------------------------------------------------------------------------------------------------------------------------------------------------------------------------------------------------------------------------|-------|----------|----------|----------|----------------------|---------------------|-----------------|
| chr9 | 95467191  | 95467191  | C | T | PTCH1          | exonic | nonsynonymous SNV | PTCH1:NM_001354918:exon14:c.G2329A:p.V777M,PTCH1:NM_000264:exon15:c.G2485A:p.V829M,PTCH1:NM_001083602:exon15:c.G2287A:p.V763M,PTCH1:NM_001083603:exon15:c.G2482A:p.V828M,PTCH1:NM_001083604:exon15:c.G2032A:p.V678M,PTCH1:NM_001083605:exon15:c.G2032A:p.V678M,PTCH1:NM_001083606:exon15:c.G2032A:p.V678M,PTCH1:NM_001083607:exon15:c.G2032A:p.V678M                                                                                                                                                                                                                                                                                                                                                                                                                                                                                                                                                                                                                                                                                                                     | 1.472 | 0.0003   | 0.0008   | 0.0002   | Fam78_f_m_aF_uM      | 0/1;0/0;0/1;0/1     |                 |
| chr9 | 95469007  | 95469007  | C | T | PTCH1          | exonic | nonsynonymous SNV | PTCH1:NM_001354918:exon13:c.G1838A:p.R613H,PTCH1:NM_000264:exon14:c.G1994A:p.R665H,PTCH1:NM_001083602:exon14:c.G1796A:p.R599H,PTCH1:NM_001083603:exon14:c.G1991A:p.R664H,PTCH1:NM_001083604:exon14:c.G1541A:p.R514H,PTCH1:NM_001083605:exon14:c.G1541A:p.R514H,PTCH1:NM_001083606:exon14:c.G1541A:p.R514H,PTCH1:NM_001083607:exon14:c.G1541A:p.R514H                                                                                                                                                                                                                                                                                                                                                                                                                                                                                                                                                                                                                                                                                                                     | 1.199 |          | 0.0001   | 3.49E-05 | Fam90_f_m_aF_dM      | 0/0;0/1;0/1;0/0     |                 |
| chr9 | 95477632  | 95477632  | C | G | PTCH1          | exonic | nonsynonymous SNV | PTCH1:NM_000264:exon10:c.G1418C:p.G473A,PTCH1:NM_001083602:exon10:c.G1220C:p.G407A,PTCH1:NM_001083603:exon10:c.G1415C:p.G472A,PTCH1:NM_001083604:exon10:c.G965C:p.G322A,PTCH1:NM_001083605:exon10:c.G965C:p.G322A,PTCH1:NM_001083606:exon10:c.G965C:p.G322A,PTCH1:NM_001083607:exon10:c.G965C:p.G322A                                                                                                                                                                                                                                                                                                                                                                                                                                                                                                                                                                                                                                                                                                                                                                    | 1.557 |          |          |          | Fam113_f_m_aF_raM_uF | 0/0;0/0;0/0;0/1;0/0 |                 |
| chr9 | 97664392  | 97664392  | C | T | NCBP1          | exonic | nonsynonymous SNV | NCBP1:NM_001351507:exon18:c.C740T:p.A247V,NCBP1:NM_001351504:exon19:c.C1649T:p.A550V,NCBP1:NM_001351505:exon19:c.C1280T:p.A427V,NCBP1:NM_001351506:exon19:c.C1280T:p.A427V,NCBP1:NM_002486:exon19:c.C1850T:p.A617V                                                                                                                                                                                                                                                                                                                                                                                                                                                                                                                                                                                                                                                                                                                                                                                                                                                       | 1.061 |          |          |          | Fam115_f_m_aF_aM_aF  | 0/0;0/1;0/0;0/0;0/1 |                 |
| chr9 | 98199523  | 98199523  | C | A | TBC1D2         | exonic | nonsynonymous SNV | TBC1D2:NM_001267572:exon7:c.G1265T:p.R422L,TBC1D2:NM_001267571:exon13:c.G2645T:p.R882L,TBC1D2:NM_018421:exon13:c.G2612T:p.R871L                                                                                                                                                                                                                                                                                                                                                                                                                                                                                                                                                                                                                                                                                                                                                                                                                                                                                                                                          | 1.088 |          |          | 1.40E-05 | Fam48_f_m_aM_uM      | 0/0;0/1;0/1;0/1     |                 |
| chr9 | 98311174  | 98311174  | C | A | GABBR2         | exonic | nonsynonymous SNV | GABBR2:NM_005458:exon14:c.G1925T:p.R642L                                                                                                                                                                                                                                                                                                                                                                                                                                                                                                                                                                                                                                                                                                                                                                                                                                                                                                                                                                                                                                 | 1.12  |          | 4.47E-05 | 6.98E-06 | Fam57_f_m_aM_uF      | 0/1;0/0;0/1;0/0     |                 |
| chr9 | 99146594  | 99146594  | C | T | TGFBR1         | exonic | stopgain          | TGFBR1:NM_001130916:exon6:c.C1009T:p.R337X,TGFBR1:NM_001306210:exon7:c.C1252T:p.R418X,TGFBR1:NM_004612:exon7:c.C1240T:p.R414X                                                                                                                                                                                                                                                                                                                                                                                                                                                                                                                                                                                                                                                                                                                                                                                                                                                                                                                                            | 0.494 |          |          |          | Fam107_f_m_aM        | 0/1;0/0;0/1         |                 |
| chr9 | 100330054 | 100330054 | A | C | TEX10          | exonic | nonsynonymous SNV | TEX10:NM_001161584:exon6:c.T1375G:p.W459G,TEX10:NM_017746:exon6:c.T1366G:p.W456G                                                                                                                                                                                                                                                                                                                                                                                                                                                                                                                                                                                                                                                                                                                                                                                                                                                                                                                                                                                         | 1.37  |          |          |          | Fam69_f_m_aM         | 0/0;0/1;0/1         |                 |
| chr9 | 101552453 | 101552453 | C | G | RNF20          | exonic | nonsynonymous SNV | RNF20:NM_019592:exon13:c.C1601G:p.A534G                                                                                                                                                                                                                                                                                                                                                                                                                                                                                                                                                                                                                                                                                                                                                                                                                                                                                                                                                                                                                                  | 1.042 |          |          |          | Fam95_f_m_aM_aM_uF   | 0/0;0/1;0/1;0/1;0/1 |                 |
| chr9 | 101561950 | 101561950 | A | G | RNF20          | exonic | nonsynonymous SNV | RNF20:NM_019592:exon19:c.A2690G:p.K897R                                                                                                                                                                                                                                                                                                                                                                                                                                                                                                                                                                                                                                                                                                                                                                                                                                                                                                                                                                                                                                  | 1.177 |          |          |          | Fam72_f_m_aF_uF      | 0/1;0/0;0/1;0/0     |                 |
| chr9 | 105365539 | 105365539 | G | A | SLC44A1        | exonic | nonsynonymous SNV | SLC44A1:NM_001286730:exon11:c.G1310A:p.R437H,SLC44A1:NM_080546:exon11:c.G1310A:p.R437H                                                                                                                                                                                                                                                                                                                                                                                                                                                                                                                                                                                                                                                                                                                                                                                                                                                                                                                                                                                   | 1.135 |          | 0.0002   | 0.0001   | 8.39E-05             | Fam69_f_m_aM        | 0/1;0/0;0/1     |
| chr9 | 105383237 | 105383237 | G | A | SLC44A1        | exonic | nonsynonymous SNV | SLC44A1:NM_001286730:exon14:c.G1747A:p.A583T,SLC44A1:NM_00130731:exon14:c.G1747A:p.A583T,SLC44A1:NM_080546:exon14:c.G1747A:p.A583T                                                                                                                                                                                                                                                                                                                                                                                                                                                                                                                                                                                                                                                                                                                                                                                                                                                                                                                                       | 1.005 |          |          | 1.40E-05 | Fam27_f_m_aF_uM_uM   | 0/0;0/1;0/1;0/1;0/0 |                 |
| chr9 | 108855399 | 108855399 | C | T | ACTL7B         | exonic | nonsynonymous SNV | ACTL7B:NM_006686:exon1:c.G532A:p.V178M                                                                                                                                                                                                                                                                                                                                                                                                                                                                                                                                                                                                                                                                                                                                                                                                                                                                                                                                                                                                                                   | 1.109 |          | 0.0002   | 0.0003   | 0.0001               | Fam31_f_m_aM_uF     | 0/1;0/0;0/1;0/1 |
| chr9 | 109320221 | 109320221 | A | C | EPB41L4B       | exonic | nonsynonymous SNV | EPB41L4B:NM_018424:exon1:c.T226G:p.S76A,EPB41L4B:NM_019114:exon1:c.T226G:p.S76A                                                                                                                                                                                                                                                                                                                                                                                                                                                                                                                                                                                                                                                                                                                                                                                                                                                                                                                                                                                          | 1.664 |          | 0.0002   | 0.0001   | 0.0001               | Fam106_f_m_aM       | 0/1;0/0;0/1     |
| chr9 | 109404512 | 109404512 | A | G | PTPN3          | exonic | nonsynonymous SNV | PTPN3:NM_001145372:exon8:c.T893C:p.L298S,PTPN3:NM_001145371:exon9:c.T1028C:p.L343S,PTPN3:NM_001145370:exon13:c.T1361C:p.L454S,PTPN3:NM_001145369:exon14:c.T1496C:p.L499S,PTPN3:NM_001145368:exon18:c.T1754C:p.L585S,PTPN3:NM_002829:exon19:c.T1889C:p.L630S                                                                                                                                                                                                                                                                                                                                                                                                                                                                                                                                                                                                                                                                                                                                                                                                              | 1.005 | 7.35E-05 | 2.25E-05 | 6.98E-06 | Fam16_f_m_aM_aM      | 0/1;0/0;0/0;0/1     |                 |
| chr9 | 110941978 | 110941978 | C | T | LPAR1          | exonic | nonsynonymous SNV | LPAR1:NM_001401:exon3:c.G236A:p.R79H,LPAR1:NM_001351397:exon4:c.G236A:p.R79H,LPAR1:NM_001351403:exon4:c.G236A:p.R79H,LPAR1:NM_001351406:exon4:c.G236A:p.R79H,LPAR1:NM_057159:exon4:c.G236A:p.R79H,LPAR1:NM_001351399:exon5:c.G236A:p.R79H,LPAR1:NM_001351402:exon5:c.G236A:p.R79H,LPAR1:NM_001351404:exon5:c.G236A:p.R79H,LPAR1:NM_001351405:exon5:c.G236A:p.R79H,LPAR1:NM_001351408:exon5:c.G236A:p.R79H,LPAR1:NM_001351411:exon5:c.G236A:p.R79H,LPAR1:NM_001351414:exon5:c.G236A:p.R79H,LPAR1:NM_001351416:exon5:c.G236A:p.R79H,LPAR1:NM_001351417:exon5:c.G236A:p.R79H,LPAR1:NM_001351419:exon5:c.G236A:p.R79H,LPAR1:NM_001351420:exon5:c.G236A:p.R79H,LPAR1:NM_001351398:exon6:c.G236A:p.R79H,LPAR1:NM_001351400:exon6:c.G236A:p.R79H,LPAR1:NM_001351401:exon6:c.G236A:p.R79H,LPAR1:NM_001351407:exon6:c.G236A:p.R79H,LPAR1:NM_001351409:exon6:c.G236A:p.R79H,LPAR1:NM_01351410:exon6:c.G236A:p.R79H,LPAR1:NM_001351412:exon6:c.G236A:p.R79H,LPAR1:NM_001351413:exon6:c.G236A:p.R79H,LPAR1:NM_001351415:exon6:c.G236A:p.R79H,LPAR1:NM_001351418:exon6:c.G236A:p.R79H | 1.911 | 7.34E-05 | 7.46E-05 | 1.40E-05 | Fam87_f_m_aM_uM      | 0/1;0/0;0/1;0/0     |                 |
| chr9 | 111631414 | 111631414 | G | T | DNAJC25;DNAJC2 | exonic | nonsynonymous SNV | DNAJC25:NM_001015882:exon1:c.G7T:p.A3S,DNAJC25:NGN10:NM_004125:exon1:c.G7T:p.A3S                                                                                                                                                                                                                                                                                                                                                                                                                                                                                                                                                                                                                                                                                                                                                                                                                                                                                                                                                                                         | 1.977 |          |          |          | Fam4_f_m_aM          | 0/0;0/1;0/1         |                 |
| chr9 | 113267439 | 113267439 | T | C | CDC26          | exonic | nonsynonymous SNV | CDC26:NM_139286:exon4:c.A82G:p.T28A                                                                                                                                                                                                                                                                                                                                                                                                                                                                                                                                                                                                                                                                                                                                                                                                                                                                                                                                                                                                                                      | 1.086 |          | 4.65E-05 |          | Fam92_f_m_aM_raM     | 0/0;0/0;0/0;0/1     |                 |

|      |           |           |   |   |            |          |                   |                                                                                                                                                                                                                                                                                                                                                                                                                                                                                                                                                                                                       |       |          |          |          |                      |                     |
|------|-----------|-----------|---|---|------------|----------|-------------------|-------------------------------------------------------------------------------------------------------------------------------------------------------------------------------------------------------------------------------------------------------------------------------------------------------------------------------------------------------------------------------------------------------------------------------------------------------------------------------------------------------------------------------------------------------------------------------------------------------|-------|----------|----------|----------|----------------------|---------------------|
| chr9 | 114008528 | 114008528 | C | T | ZNF618     | exonic   | nonsynonymous SNV | ZNF618:NM_001318040:exon8:c.G632T:p.P211L,ZNF618:NM_001318041:exon8:c.G632T:p.P211L,ZNF618:NM_133374:exon8:c.G632T:p.P211L,ZNF618:NM_001318042:exon9:c.C728T:p.P243L                                                                                                                                                                                                                                                                                                                                                                                                                                  | 1.154 | 0.0003   | 6.58E-05 | 2.09E-05 | Fam121_f_m_aF_aM     | 0/0;0/1;0/1;0/0     |
| chr9 | 114048867 | 114048867 | C | T | ZNF618     | exonic   | nonsynonymous SNV | ZNF618:NM_001318040:exon14:c.C1466T:p.A489V,ZNF618:NM_001318041:exon14:c.C1469T:p.A490V,ZNF618:NM_133374:exon14:c.C1286T:p.A429V,ZNF618:NM_001318042:exon15:c.C1565T:p.A522V                                                                                                                                                                                                                                                                                                                                                                                                                          | 1.327 | 7.35E-05 | 0.0002   | 3.49E-05 | Fam6_f_m_aM          | 0/0;0/1;0/1         |
| chr9 | 114504317 | 114504317 | T | C | WHRN       | exonic   | nonsynonymous SNV | WHRN:NM_001173425:exon1:c.A485G:p.H162R,WHRN:NM_015404:exon1:c.A485G:p.H162R                                                                                                                                                                                                                                                                                                                                                                                                                                                                                                                          | 1.786 |          |          |          | Fam85_f_m_aM_aM      | 0/0;0/1;0/0;0/1     |
| chr9 | 116187799 | 116187799 | G | A | PAPPA      | exonic   | nonsynonymous SNV | PAPPA:NM_002581:exon2:c.G1061A:p.R354H                                                                                                                                                                                                                                                                                                                                                                                                                                                                                                                                                                | 1.131 |          | 6.54E-05 |          | Fam89_f_m_aM         | 0/1;0/0;0/1         |
| chr9 | 116698209 | 116698209 | T | C | TRIM32     | exonic   | nonsynonymous SNV | TRIM32:NM_001099679:exon2:c.T467C:p.L156P,TRIM32:NM_012210:exon2:c.T467C:p.L156P                                                                                                                                                                                                                                                                                                                                                                                                                                                                                                                      | 1.116 | 0.0001   | 0.0001   | 4.89E-05 | Fam2_f_m_aF          | 0/1;0/0;0/1         |
| chr9 | 120788188 | 120788188 | T | C | FBXW2      | exonic   | nonsynonymous SNV | FBXW2:NM_012164:exon3:c.A71G:p.Q24R                                                                                                                                                                                                                                                                                                                                                                                                                                                                                                                                                                   | 1.698 | 0.0007   | 0.001    | 0.0006   | Fam39_f_m_aM         | 0/1;0/0;0/1         |
| chr9 | 122858086 | 122858086 | C | T | RC3H2      | exonic   | nonsynonymous SNV | RC3H2:NM_001100588:exon13:c.G2291A:p.C764Y,RC3H2:NM_001354478:exon13:c.G2291A:p.C764Y,RC3H2:NM_001354482:exon13:c.G2291A:p.C764Y,RC3H2:NM_018835:exon13:c.G2291A:p.C764Y                                                                                                                                                                                                                                                                                                                                                                                                                              | 1.005 | 7.34E-05 | 0.0001   | 6.98E-05 | Fam19_f_m_aM         | 0/0;0/1;0/1         |
| chr9 | 123035533 | 123035533 | T | C | GPR21      | exonic   | nonsynonymous SNV | GPR21:NM_005294:exon2:c.T967C:p.C323R                                                                                                                                                                                                                                                                                                                                                                                                                                                                                                                                                                 | 1.005 |          | 6.70E-05 | 4.89E-05 | Fam110_f_m_aM_aM_uMs | 0/1;0/0;0/1;0/1;0/0 |
| chr9 | 123101617 | 123101617 | C | T | RABGAP1    | exonic   | nonsynonymous SNV | RABGAP1:NM_012197:exon25:c.C2941T:p.R981C                                                                                                                                                                                                                                                                                                                                                                                                                                                                                                                                                             | 1.057 | 0.0003   | 0.0006   | 0.0004   | Fam70_f_m_aM         | 0/0;0/1;0/1         |
| chr9 | 124771058 | 124771058 | A | T | NR6A1      | exonic   | nonsynonymous SNV | NR6A1:NM_001278546:exon1:c.T62A:p.L21Q,NR6A1:NM_001489:exon1:c.T62A:p.L21Q,NR6A1:NM_033334:exon1:c.T62A:p.L21Q                                                                                                                                                                                                                                                                                                                                                                                                                                                                                        | 1.135 |          |          | 4.90E-05 | Fam15_f_m_aM_aM      | 0/0;0/1;0/0;0/1     |
| chr9 | 125238588 | 125238588 | A | G | HSPA5      | splicing |                   |                                                                                                                                                                                                                                                                                                                                                                                                                                                                                                                                                                                                       | 0.505 |          |          | 1.12E-05 | Fam102_f_m_aM        | 0/0;0/1;0/1         |
| chr9 | 125354665 | 125354665 | C | T | GAPVD1     | exonic   | nonsynonymous SNV | GAPVD1:NM_001330778:exon21:c.C3500T:p.P1167L,GAPVD1:NM_001282681:exon22:c.C3518T:p.P1173L,GAPVD1:NM_001330777:exon22:c.C3437T:p.P1146L,GAPVD1:NM_001354294:exon22:c.C3581T:p.P1194L,GAPVD1:NM_001354298:exon22:c.C3581T:p.P1194L,GAPVD1:NM_001354295:exon23:c.C3581T:p.P1194L,GAPVD1:NM_001354300:exon23:c.C3518T:p.P1173L,GAPVD1:NM_015635:exon23:c.C3662T:p.P1221L,GAPVD1:NM_001282679:exon24:c.C3635T:p.P1212L,GAPVD1:NM_001282680:exon24:c.C3581T:p.P1194L,GAPVD1:NM_001354296:exon24:c.C3581T:p.P1194L,GAPVD1:NM_001354301:exon24:c.C3581T:p.P1173L,GAPVD1:NM_001354299:exon25:c.C3581T:p.P1194L | 1.131 |          | 3.29E-05 |          | Fam12_f_m_aM_uM_aM   | 0/0;0/1;0/1;0/0;0/1 |
| chr9 | 125657708 | 125657708 | T | A | MAPKAP1    | exonic   | nonsynonymous SNV | MAPKAP1:NM_001006617:exon4:c.A441T:p.E147D,MAPKAP1:NM_001006618:exon4:c.A441T:p.E147D,MAPKAP1:NM_001006619:exon4:c.A441T:p.E147D,MAPKAP1:NM_024117:exon4:c.A441T:p.E147D                                                                                                                                                                                                                                                                                                                                                                                                                              | 1.452 |          | 2.23E-05 |          | Fam21_f_m_aM_uM      | 0/0;0/1;0/1;0/1     |
| chr9 | 126327003 | 126327003 | G | A | MVB12B     | exonic   | nonsynonymous SNV | MVB12B:NM_001011703:exon1:c.G74A:p.R25Q,MVB12B:NM_033446:exon1:c.G74A:p.R25Q                                                                                                                                                                                                                                                                                                                                                                                                                                                                                                                          | 1.103 | 8.21E-05 | 0.0005   | 8.01E-05 | Fam15_f_m_aM_aM      | 0/0;0/1;0/0;0/1     |
| chr9 | 126327003 | 126327003 | G | A | MVB12B     | exonic   | nonsynonymous SNV | MVB12B:NM_001011703:exon1:c.G74A:p.R25Q,MVB12B:NM_033446:exon1:c.G74A:p.R25Q                                                                                                                                                                                                                                                                                                                                                                                                                                                                                                                          | 1.103 | 8.21E-05 | 0.0005   | 8.01E-05 | Fam1_f_m_aM          | 0/0;0/1;0/1         |
| chr9 | 126880220 | 126880220 | T | C | ZBTB34     | exonic   | nonsynonymous SNV | ZBTB34:NM_001099270:exon2:c.T809C:p.V270A                                                                                                                                                                                                                                                                                                                                                                                                                                                                                                                                                             | 1.866 |          |          | 2.10E-05 | Fam62_f_m_aM_aM      | 0/0;0/1;0/1;0/1     |
| chr9 | 127212684 | 127212684 | G | A | RALGPS1    | exonic   | nonsynonymous SNV | RALGPS1:NM_001190728:exon14:c.G1285A:p.G429R,RALGPS1:NM_001322323:exon14:c.G1195A:p.G399R,RALGPS1:NM_001366401:exon14:c.G1285A:p.G429R,RALGPS1:NM_001190729:exon15:c.G1285A:p.G429R,RALGPS1:NM_001322320:exon15:c.G1285A:p.G429R,RALGPS1:NM_001322324:exon15:c.G1282A:p.G428R,RALGPS1:NM_001366400:exon16:c.G1411A:p.G471R,RALGPS1:NM_014636:exon16:c.G1411A:p.G471R,RALGPS1:NM_001322321:exon17:c.G1492A:p.G498R,RALGPS1:NM_001322322:exon17:c.G1492A:p.G498R,RALGPS1:NM_001322325:exon17:c.G1495A:p.G499R                                                                                           | 1.048 |          | 2.24E-05 | 6.98E-06 | Fam59_f_m_aF_uM      | 0/0;0/1;0/1;0/0     |
| chr9 | 127339670 | 127339670 | G | A | GARNL3     | exonic   | nonsynonymous SNV | GARNL3:NM_032293:exon13:c.G1054A:p.V352I,GARNL3:NM_001286779:exon14:c.G988A:p.V330I                                                                                                                                                                                                                                                                                                                                                                                                                                                                                                                   | 1.01  |          | 0.0001   | 2.09E-05 | Fam88_f_m_aF         | 0/1;0/0;0/1         |
| chr9 | 127747179 | 127747179 | G | A | SH2D3C     | exonic   | nonsynonymous SNV | SH2D3C:NM_001142533:exon4:c.C758T:p.S253F,SH2D3C:NM_001142534:exon4:c.C752T:p.S251F,SH2D3C:NM_001142531:exon5:c.C170T:p.S57F,SH2D3C:NM_001142532:exon5:c.C170T:p.S57F,SH2D3C:NM_005489:exon5:c.C761T:p.S254F,SH2D3C:NM_001252334:exon6:c.C1028T:p.S343F,SH2D3C:NM_170600:exon6:c.C1232T:p.S411F                                                                                                                                                                                                                                                                                                       | 1.287 |          | 3.28E-05 | 6.98E-06 | Fam10_f_m_aM_uF      | 0/1;0/0;0/1;0/0     |
| chr9 | 127890820 | 127890820 | C | T | ST6GALNAC6 | exonic   | nonsynonymous SNV | ST6GALNAC6:NM_001287000:exon4:c.G419A:p.R140Q,ST6GALNAC6:NM_001287001:exon4:c.G419A:p.R140Q,ST6GALNAC6:NM_001287002:exon4:c.G419A:p.R140Q,ST6GALNAC6:NM_001286999:exon5:c.G521A:p.R174Q,ST6GALNAC6:NM_013443:exon5:c.G521A:p.R174Q                                                                                                                                                                                                                                                                                                                                                                    | 1.179 | 0.0001   | 0.0002   | 0.0002   | Fam109_f_m_aM        | 0/0;0/1;0/1         |
| chr9 | 127921932 | 127921932 | C | G | PIPSKL1    | exonic   | nonsynonymous SNV | PIPSKL1:NM_173492:exon5:c.G491C:p.R164P,PIPSKL1:NM_001135219:exon10:c.G1100C:p.R367P                                                                                                                                                                                                                                                                                                                                                                                                                                                                                                                  | 1.391 |          |          |          | Fam22_f_m_aF_aF_uF   | 0/0;0/1;0/1;0/1;0/0 |

|      |           |           |   |   |         |        |                   |                                                                                                                                                                                                                                                                                                                                                                                                                                                                                                                                                                                                                                                                                                                                  |       |        |          |          |                    |                     |
|------|-----------|-----------|---|---|---------|--------|-------------------|----------------------------------------------------------------------------------------------------------------------------------------------------------------------------------------------------------------------------------------------------------------------------------------------------------------------------------------------------------------------------------------------------------------------------------------------------------------------------------------------------------------------------------------------------------------------------------------------------------------------------------------------------------------------------------------------------------------------------------|-------|--------|----------|----------|--------------------|---------------------|
| chr9 | 128499080 | 128499080 | G | A | ODF2    | exonic | nonsynonymous SNV | ODF2:NM_001351581:exon19:c.G2387A:p.S796N,ODF2:NM_001351587:exon19:c.G2069A:p.S690N,ODF2:NM_001351588:exon19:c.G2012A:p.S671N,ODF2:NM_001242352:exon20:c.G2240A:p.S747N,ODF2:NM_001242353:exon20:c.G2255A:p.S752N,ODF2:NM_001351577:exon20:c.G2660A:p.S887N,ODF2:NM_001351578:exon20:c.G2504A:p.S835N,ODF2:NM_001351579:exon20:c.G2396A:p.S799N,ODF2:NM_001351583:exon20:c.G2339A:p.S780N,ODF2:NM_001351584:exon20:c.G2240A:p.S747N,ODF2:NM_001351586:exon20:c.G2183A:p.S728N,ODF2:NM_153433:exon20:c.G2255A:p.S752N,ODF2:NM_153435:exon20:c.G2447A:p.S816N,ODF2:NM_001351580:exon21:c.G2396A:p.S799N,ODF2:NM_001351582:exon21:c.G2372A:p.S791N,ODF2:NM_001351585:exon21:c.G2240A:p.S747N,ODF2:NM_002540:exon22:c.G2183A:p.S728N | 1.114 | 0.0005 | 0.0008   | 0.0005   | Fam28_f_m_aF_uF    | 0/0;0/1;0/1;0/0     |
| chr9 | 128499080 | 128499080 | G | A | ODF2    | exonic | nonsynonymous SNV | ODF2:NM_001351581:exon19:c.G2387A:p.S796N,ODF2:NM_001351587:exon19:c.G2069A:p.S690N,ODF2:NM_001351588:exon19:c.G2012A:p.S671N,ODF2:NM_001242352:exon20:c.G2240A:p.S747N,ODF2:NM_001242353:exon20:c.G2255A:p.S752N,ODF2:NM_001351577:exon20:c.G2660A:p.S887N,ODF2:NM_001351578:exon20:c.G2504A:p.S835N,ODF2:NM_001351579:exon20:c.G2396A:p.S799N,ODF2:NM_001351583:exon20:c.G2339A:p.S780N,ODF2:NM_001351584:exon20:c.G2240A:p.S747N,ODF2:NM_001351586:exon20:c.G2183A:p.S728N,ODF2:NM_153433:exon20:c.G2255A:p.S752N,ODF2:NM_153435:exon20:c.G2447A:p.S816N,ODF2:NM_001351580:exon21:c.G2396A:p.S799N,ODF2:NM_001351582:exon21:c.G2372A:p.S791N,ODF2:NM_001351585:exon21:c.G2240A:p.S747N,ODF2:NM_002540:exon22:c.G2183A:p.S728N | 1.114 | 0.0005 | 0.0008   | 0.0005   | Fam1_f_m_aM        | 0/1;0/0;0/1         |
| chr9 | 128582755 | 128582755 | A | G | SPTAN1  | exonic | nonsynonymous SNV | SPTAN1:NM_001130438:exon14:c.A1712G:p.D571G,SPTAN1:NM_001195532:exon14:c.A1712G:p.D571G,SPTAN1:NM_001363759:exon14:c.A1712G:p.D571G,SPTAN1:NM_001363765:exon14:c.A1712G:p.D571G,SPTAN1:NM_003127:exon14:c.A1712G:p.D571G,SPTAN1:NM_001195532:exon27:c.T3545C:p.V1182A,SPTAN1:NM_001363765:exon27:c.T3545C:p.V1182A,SPTAN1:NM_001130438:exon28:c.T3605C:p.V1202A,SPTAN1:NM_001363759:exon28:c.T3605C:p.V1202A,SPTAN1:NM_003127:exon28:c.T3605C:p.V1202A                                                                                                                                                                                                                                                                           | 1.526 |        |          |          | Fam79_f_m_aM_uM    | 0/0;0/1;0/1;0/1     |
| chr9 | 128603568 | 128603568 | T | C | SPTAN1  | exonic | nonsynonymous SNV | SPTAN1:NM_001130438:exon28:c.T3605C:p.V1202A,SPTAN1:NM_001363759:exon28:c.T3605C:p.V1202A,SPTAN1:NM_003127:exon28:c.T3605C:p.V1202A                                                                                                                                                                                                                                                                                                                                                                                                                                                                                                                                                                                              | 1.032 |        |          |          | Fam92_f_m_aM_raM   | 0/0;0/1;0/1;0/0     |
| chr9 | 128735415 | 128735415 | G | T | ZER1    | exonic | nonsynonymous SNV | ZER1:NM_006336:exon14:c.C2059A:p.L687I                                                                                                                                                                                                                                                                                                                                                                                                                                                                                                                                                                                                                                                                                           | 1.648 |        |          |          | Fam120_f_m_aM_aM   | 0/0;0/1;0/1;0/0     |
| chr9 | 128792561 | 128792561 | G | A | TBC1D13 | exonic | nonsynonymous SNV | TBC1D13:NM_001286772:exon6:c.G370A:p.D124N,TBC1D13:NM_018201:exon6:c.G370A:p.D124N                                                                                                                                                                                                                                                                                                                                                                                                                                                                                                                                                                                                                                               | 1.493 | 0.0003 | 0.0001   | 5.58E-05 | Fam16_f_m_aM_aM    | 0/0;0/1;0/0;0/1     |
| chr9 | 128803439 | 128803439 | G | A | TBC1D13 | exonic | nonsynonymous SNV | TBC1D13:NM_018201:exon8:c.G733A:p.D245N                                                                                                                                                                                                                                                                                                                                                                                                                                                                                                                                                                                                                                                                                          | 1.075 | 0.0001 | 0.0002   | 8.38E-05 | Fam112_f_m_aM      | 0/0;0/1;0/1         |
| chr9 | 128819107 | 128819107 | C | G | ENDOG   | exonic | nonsynonymous SNV | ENDOG:NM_004435:exon1:c.C423G:p.H141Q                                                                                                                                                                                                                                                                                                                                                                                                                                                                                                                                                                                                                                                                                            | 1.011 |        |          |          | Fam54_f_m_aM_uF    | 0/1;0/0;0/1;0/1     |
| chr9 | 128945745 | 128945745 | G | T | DOLK    | exonic | nonsynonymous SNV | DOLK:NM_014908:exon1:c.C1559A:p.T520N                                                                                                                                                                                                                                                                                                                                                                                                                                                                                                                                                                                                                                                                                            | 1.229 |        |          |          | Fam64_f_m_aM       | 0/1;0/0;0/1         |
| chr9 | 128945974 | 128945974 | C | A | DOLK    | exonic | nonsynonymous SNV | DOLK:NM_014908:exon1:c.G1330T:p.V444F                                                                                                                                                                                                                                                                                                                                                                                                                                                                                                                                                                                                                                                                                            | 1.327 |        |          |          | Fam27_f_m_aF_uM_uM | 0/1;0/0;0/1;0/1;0/0 |
| chr9 | 129010152 | 129010152 | G | A | SH3GLB2 | exonic | nonsynonymous SNV | SH3GLB2:NM_001369915:exon7:c.G643T:p.R215C,SH3GLB2:NM_001287046:exon8:c.C706T:p.R236C,SH3GLB2:NM_020145:exon8:c.C706T:p.R236C,SH3GLB2:NM_001287045:exon9:c.C718T:p.R240C,SH3GLB2:NM_001369913:exon9:c.C751T:p.R251C,SH3GLB2:NM_001369914:exon9:c.C718T:p.R240C,CRAT:NM_000755:exon7:c.G932C:p.G311A,CRAT:NM_001346549:exon7:c.G932C:p.G311A,CRAT:NM_001257363:exon8:c.G869C:p.G290A,CRAT:NM_001346546:exon8:c.G935C:p.G312A,CRAT:NM_001346548:exon8:c.G869C:p.G290A,CRAT:NM_004003:exon8:c.G869C:p.G290A,ASB6:NM_001202403:exon5:c.T748C:p.F250L,ASB6:NM_017873:exon6:c.T835C:p.F279L                                                                                                                                            | 1.104 |        | 7.46E-05 | 6.98E-06 | Fam12_f_m_aM_uM_aM | 0/1;0/0;0/1;0/0;0/0 |
| chr9 | 129100563 | 129100563 | C | G | CRAT    | exonic | nonsynonymous SNV | CRAT:NM_000755:exon7:c.G932C:p.G311A,CRAT:NM_001346549:exon7:c.G932C:p.G311A,CRAT:NM_001257363:exon8:c.G869C:p.G290A,CRAT:NM_001346546:exon8:c.G935C:p.G312A,CRAT:NM_001346548:exon8:c.G869C:p.G290A,CRAT:NM_004003:exon8:c.G869C:p.G290A                                                                                                                                                                                                                                                                                                                                                                                                                                                                                        | 1.011 |        |          |          | Fam12_f_m_aM_uM_aM | 0/1;0/0;0/0;0/1;0/1 |
| chr9 | 129638221 | 129638221 | A | G | ASB6    | exonic | nonsynonymous SNV | ASB6:NM_001202403:exon5:c.T748C:p.F250L,ASB6:NM_017873:exon6:c.T835C:p.F279L                                                                                                                                                                                                                                                                                                                                                                                                                                                                                                                                                                                                                                                     | 1.185 | 0.0001 | 0.0001   | 5.58E-05 | Fam100_f_m_aF      | 0/0;0/1;0/1         |
| chr9 | 129719341 | 129719341 | G | C | PRRX2   | exonic | nonsynonymous SNV | PRRX2:NM_016307:exon2:c.G370C:p.E124Q                                                                                                                                                                                                                                                                                                                                                                                                                                                                                                                                                                                                                                                                                            | 1.232 |        |          |          | Fam57_f_m_aM_uF    | 0/0;0/1;0/1;0/1     |
| chr9 | 129720701 | 129720701 | G | A | PRRX2   | exonic | nonsynonymous SNV | PRRX2:NM_016307:exon3:c.G553A:p.E185K                                                                                                                                                                                                                                                                                                                                                                                                                                                                                                                                                                                                                                                                                            | 1.237 |        |          | 6.98E-06 | Fam73_f_m_aF_dM    | 0/0;0/1;0/1;0/1     |
| chr9 | 129720701 | 129720701 | G | A | PRRX2   | exonic | nonsynonymous SNV | PRRX2:NM_016307:exon3:c.G553A:p.E185K                                                                                                                                                                                                                                                                                                                                                                                                                                                                                                                                                                                                                                                                                            | 1.237 |        |          | 6.98E-06 | Fam92_f_m_aM_raM   | 0/1;0/0;0/1;0/1     |
| chr9 | 129804272 | 129804272 | T | G | TOR1B   | exonic | nonsynonymous SNV | TOR1B:NM_001317893:exon2:c.T399G:p.S133R,TOR1B:NM_001317894:exon2:c.T399G:p.S133R,TOR1B:NM_014506:exon2:c.T399G:p.S133R                                                                                                                                                                                                                                                                                                                                                                                                                                                                                                                                                                                                          | 1.186 | 0.0005 | 0.0004   | 0.0002   | Fam59_f_m_aF_uM    | 0/0;0/1;0/1;0/0     |
| chr9 | 129868897 | 129868897 | C | T | USP20   | exonic | nonsynonymous SNV | USP20:NM_001008563:exon12:c.C1171T:p.R391C,USP20:NM_001110303:exon12:c.C1171T:p.R391C,USP20:NM_006676:exon12:c.C1171T:p.R391C                                                                                                                                                                                                                                                                                                                                                                                                                                                                                                                                                                                                    | 1.072 | 0.0003 | 0.0004   | 6.28E-05 | Fam106_f_m_aM      | 0/1;0/0;0/1         |
| chr9 | 130076430 | 130076430 | C | T | GPR107  | exonic | nonsynonymous SNV | GPR107:NM_001136557:exon3:c.C274T:p.R92C,GPR107:NM_0020960:exon3:c.C274T:p.R92C                                                                                                                                                                                                                                                                                                                                                                                                                                                                                                                                                                                                                                                  | 1.146 | 0.0006 | 0.0005   | 0.0002   | Fam51_f_m_aM_uF    | 0/0;0/1;0/1;0/1     |
| chr9 | 130862802 | 130862802 | G | A | ABL1    | exonic | nonsynonymous SNV | ABL1:NM_005157:exon4:c.G589A:p.E197K,ABL1:NM_007313:exon4:c.G646A:p.E216K                                                                                                                                                                                                                                                                                                                                                                                                                                                                                                                                                                                                                                                        | 2.472 | 0.0003 | 0.0009   | 0.0003   | Fam11_f_m_aM_uM    | 0/0;0/1;0/1;0/1     |



|      |           |           |   |   |         |        |                      |                                                                                                                                                                                                                                                                                                                                                                                                                                                                                                                                                                                                                                                      |       |          |          |                 |                     |                     |
|------|-----------|-----------|---|---|---------|--------|----------------------|------------------------------------------------------------------------------------------------------------------------------------------------------------------------------------------------------------------------------------------------------------------------------------------------------------------------------------------------------------------------------------------------------------------------------------------------------------------------------------------------------------------------------------------------------------------------------------------------------------------------------------------------------|-------|----------|----------|-----------------|---------------------|---------------------|
| chr9 | 131197620 | 131197620 | - | C | NUP214  | exonic | frameshift insertion | NUP214:NM_001318325:exon4:c.605dupC;p.V205Gfs*60,<br>NUP214:NM_001318324:exon29:c.4097dupC;p.V1369Gfs*<br>60,NUP214:NM_005085:exon29:c.4127dupC;p.V1379Gfs*6<br>0                                                                                                                                                                                                                                                                                                                                                                                                                                                                                    | 0.458 | 9.83E-05 | 2.10E-05 | Fam82_f_m_aM_uF | 0/1;0/0;0/1;0/1     |                     |
| chr9 | 131308058 | 131308058 | G | A | PLPP7   | exonic | nonsynonymous SNV    | PLPP7:NM_032728:exon2:c.G587A;p.R196H<br>POMT1:NM_001077366:exon4:c.C176A;p.A59D,POMT1:N<br>M_001353194:exon4:c.C176A;p.A59D,POMT1:NM_001353<br>196:exon4:c.C248A;p.A83D,POMT1:NM_001353197:exon4<br>:c.C176A;p.A59D,POMT1:NM_001077365:exon5:c.C338A;p<br>.A113D,POMT1:NM_001136113:exon5:c.C338A;p.A113D,P<br>OMT1:NM_001353193:exon5:c.C338A;p.A113D,POMT1:N<br>M_001353198:exon5:c.C176A;p.A59D,POMT1:NM_007171<br>:exon5:c.C338A;p.A113D                                                                                                                                                                                                        | 1.325 | 0.0003   | 0.0001   | 2.79E-05        | Fam79_f_m_aM_uM     | 0/1;0/0;0/1;0/1     |
| chr9 | 131507425 | 131507425 | C | A | POMT1   | exonic | nonsynonymous SNV    | POMT1:NM_001077366:exon4:c.C176A;p.A59D,POMT1:N<br>M_001353194:exon4:c.C176A;p.A59D,POMT1:NM_001353<br>196:exon4:c.C248A;p.A83D,POMT1:NM_001353197:exon4<br>:c.C176A;p.A59D,POMT1:NM_001077365:exon5:c.C338A;p<br>.A113D,POMT1:NM_001136113:exon5:c.C338A;p.A113D,P<br>OMT1:NM_001353193:exon5:c.C338A;p.A113D,POMT1:N<br>M_001353198:exon5:c.C176A;p.A59D,POMT1:NM_007171<br>:exon5:c.C338A;p.A113D                                                                                                                                                                                                                                                 | 1.064 |          |          |                 | Fam89_f_m_aM        | 0/0;0/1;0/1         |
| chr9 | 132582843 | 132582843 | C | T | BARHL1  | exonic | nonsynonymous SNV    | BARHL1:NM_020064:exon1:c.C46T;p.R16C                                                                                                                                                                                                                                                                                                                                                                                                                                                                                                                                                                                                                 | 2.237 |          | 3.28E-05 | 6.98E-06        | Fam84_f_m_aF        | 0/1;0/0;0/1         |
| chr9 | 132679603 | 132679603 | C | T | GTF3C4  | exonic | nonsynonymous SNV    | GTF3C4:NM_012204:exon2:c.C1984T;p.R662C<br>TSC1:NM_001162427:exon22:c.G3011T;p.R1004M,TSC1:N<br>M_001362177:exon22:c.G2801T;p.R934M,TSC1:NM_0003<br>68:exon23:c.G3164T;p.R1055M,TSC1:NM_001162426:exon<br>23:c.G3161T;p.R1054M<br>TSC1:NM_001162427:exon15:c.G1870T;p.D624Y,TSC1:NM<br>_001362177:exon15:c.G1660T;p.D554Y,TSC1:NM_000368:<br>exon16:c.G2023T;p.D675Y,TSC1:NM_001162426:exon16:c.<br>G2020T;p.D674Y<br>RALGDS:NM_001042368:exon5:c.G551A;p.R184H,RALGDS:<br>NM_001271774:exon5:c.G629A;p.R210H,RALGDS:NM_001<br>271775:exon5:c.G713A;p.R238H,RALGDS:NM_001271776:<br>exon5:c.G680A;p.R227H,RALGDS:NM_006266:exon5:c.G71<br>6A;p.R239H | 1.578 | 0.0002   | 0.0001   | 0.0001          | Fam15_f_m_aM_aM     | 0/0;0/1;0/0;0/1     |
| chr9 | 132896566 | 132896566 | C | A | TSC1    | exonic | nonsynonymous SNV    | TSC1:NM_001162427:exon22:c.G3011T;p.R1004M,TSC1:N<br>M_001362177:exon22:c.G2801T;p.R934M,TSC1:NM_0003<br>68:exon23:c.G3164T;p.R1055M,TSC1:NM_001162426:exon<br>23:c.G3161T;p.R1054M<br>TSC1:NM_001162427:exon15:c.G1870T;p.D624Y,TSC1:NM<br>_001362177:exon15:c.G1660T;p.D554Y,TSC1:NM_000368:<br>exon16:c.G2023T;p.D675Y,TSC1:NM_001162426:exon16:c.<br>G2020T;p.D674Y<br>RALGDS:NM_001042368:exon5:c.G551A;p.R184H,RALGDS:<br>NM_001271774:exon5:c.G629A;p.R210H,RALGDS:NM_001<br>271775:exon5:c.G713A;p.R238H,RALGDS:NM_001271776:<br>exon5:c.G680A;p.R227H,RALGDS:NM_006266:exon5:c.G71<br>6A;p.R239H                                            | 1.502 |          |          |                 | Fam115_f_m_aF_aM_aF | 0/1;0/0;0/0;0/1;0/1 |
| chr9 | 132904429 | 132904429 | C | A | TSC1    | exonic | nonsynonymous SNV    | TSC1:NM_001162427:exon15:c.G1870T;p.D624Y,TSC1:NM<br>_001362177:exon15:c.G1660T;p.D554Y,TSC1:NM_000368:<br>exon16:c.G2023T;p.D675Y,TSC1:NM_001162426:exon16:c.<br>G2020T;p.D674Y<br>RALGDS:NM_001042368:exon5:c.G551A;p.R184H,RALGDS:<br>NM_001271774:exon5:c.G629A;p.R210H,RALGDS:NM_001<br>271775:exon5:c.G713A;p.R238H,RALGDS:NM_001271776:<br>exon5:c.G680A;p.R227H,RALGDS:NM_006266:exon5:c.G71<br>6A;p.R239H                                                                                                                                                                                                                                   | 1.578 |          |          |                 | Fam100_f_m_aF       | 0/0;0/0;0/1         |
| chr9 | 133108735 | 133108735 | C | T | RALGDS  | exonic | nonsynonymous SNV    | RALGDS:NM_001042368:exon5:c.G551A;p.R184H,RALGDS:<br>NM_001271774:exon5:c.G629A;p.R210H,RALGDS:NM_001<br>271775:exon5:c.G713A;p.R238H,RALGDS:NM_001271776:<br>exon5:c.G680A;p.R227H,RALGDS:NM_006266:exon5:c.G71<br>6A;p.R239H                                                                                                                                                                                                                                                                                                                                                                                                                       | 1.126 |          | 9.84E-05 | 4.19E-05        | Fam11_f_m_aM_uM     | 0/1;0/0;0/1;0/0     |
| chr9 | 133121003 | 133121003 | G | A | RALGDS  | exonic | nonsynonymous SNV    | RALGDS:NM_001042368:exon5:c.G551A;p.R184H,RALGDS:<br>NM_001271774:exon5:c.G629A;p.R210H,RALGDS:NM_001<br>271775:exon5:c.G713A;p.R238H,RALGDS:NM_001271776:<br>exon5:c.G680A;p.R227H,RALGDS:NM_006266:exon5:c.G71<br>6A;p.R239H                                                                                                                                                                                                                                                                                                                                                                                                                       | 1.081 |          |          | 6.98E-06        | Fam15_f_m_aM_aM     | 0/1;0/0;0/1;0/1     |
| chr9 | 133515501 | 133515501 | A | C | MYMK    | exonic | nonsynonymous SNV    | MYMK:NM_001080483:exon4:c.T506G;p.F169C                                                                                                                                                                                                                                                                                                                                                                                                                                                                                                                                                                                                              | 1.268 |          | 3.36E-05 | 2.79E-05        | Fam71_f_m_aF        | 0/1;0/0;0/1         |
| chr9 | 133788445 | 133788445 | C | T | VAV2    | exonic | nonsynonymous SNV    | VAV2:NM_003371:exon14:c.G1301A;p.R434Q,VAV2:NM_0<br>0134398:exon15:c.G1316A;p.R439Q<br>COL5A1:NM_000093:exon28:c.A2419G;p.K807E,COL5A1:N<br>M_001278074:exon28:c.A2419G;p.K807E                                                                                                                                                                                                                                                                                                                                                                                                                                                                      | 1.11  | 0.0003   | 0.0004   | 0.0001          | Fam16_f_m_aM_aM     | 0/0;0/1;0/0;0/1     |
| chr9 | 134780135 | 134780135 | A | G | COL5A1  | exonic | nonsynonymous SNV    | COL5A1:NM_000093:exon28:c.A2419G;p.K807E,COL5A1:N<br>M_001278074:exon28:c.A2419G;p.K807E                                                                                                                                                                                                                                                                                                                                                                                                                                                                                                                                                             | 1.205 |          |          |                 | Fam6_f_m_aM         | 0/0;0/1;0/1         |
| chr9 | 136050500 | 136050500 | C | G | NACC2   | exonic | nonsynonymous SNV    | NACC2:NM_144653:exon2:c.G22C;p.E8Q                                                                                                                                                                                                                                                                                                                                                                                                                                                                                                                                                                                                                   | 1.701 |          |          |                 | Fam9_f_m_aM_dM_uF   | 0/0;0/1;0/1;0/1;0/0 |
| chr9 | 136496801 | 136496801 | C | T | NOTCH1  | exonic | nonsynonymous SNV    | NOTCH1:NM_017617:exon34:c.G6938A;p.R2313Q                                                                                                                                                                                                                                                                                                                                                                                                                                                                                                                                                                                                            | 1.121 | 0.0001   | 0.0001   | 0.0001          | Fam13_f_m_aM        | 0/1;0/0;0/1         |
| chr9 | 136502033 | 136502033 | C | T | NOTCH1  | exonic | nonsynonymous SNV    | NOTCH1:NM_017617:exon29:c.G5440A;p.G1814R                                                                                                                                                                                                                                                                                                                                                                                                                                                                                                                                                                                                            | 1.803 |          | 6.51E-05 |                 | Fam118_f_m_aM_aF_uM | 0/0;0/1;0/1;0/0;0/0 |
| chr9 | 136502408 | 136502408 | C | T | NOTCH1  | exonic | nonsynonymous SNV    | NOTCH1:NM_017617:exon28:c.G5248A;p.V1750M                                                                                                                                                                                                                                                                                                                                                                                                                                                                                                                                                                                                            | 1.086 |          | 7.26E-05 | 4.89E-05        | Fam45_f_m_aM_uF     | 0/1;0/0;0/1;0/0     |
| chr9 | 136505865 | 136505865 | G | A | NOTCH1  | exonic | nonsynonymous SNV    | NOTCH1:NM_017617:exon25:c.C4031T;p.T1344M                                                                                                                                                                                                                                                                                                                                                                                                                                                                                                                                                                                                            | 1.06  | 0.0006   | 0.0008   | 0.0004          | Fam85_f_m_aM_aM     | 0/1;0/0;0/1;0/0     |
| chr9 | 136506950 | 136506950 | C | T | NOTCH1  | exonic | nonsynonymous SNV    | NOTCH1:NM_017617:exon23:c.G3667A;p.D1223N                                                                                                                                                                                                                                                                                                                                                                                                                                                                                                                                                                                                            | 1.172 |          | 2.41E-05 | 1.40E-05        | Fam16_f_m_aM_aM     | 0/1;0/0;0/1;0/0     |
| chr9 | 136513116 | 136513116 | T | C | NOTCH1  | exonic | nonsynonymous SNV    | NOTCH1:NM_017617:exon15:c.A2372G;p.N791S                                                                                                                                                                                                                                                                                                                                                                                                                                                                                                                                                                                                             | 1.025 |          |          |                 | Fam50_f_m_aF        | 0/1;0/0;0/1         |
| chr9 | 136515525 | 136515525 | G | A | NOTCH1  | exonic | nonsynonymous SNV    | NOTCH1:NM_017617:exon11:c.C1861T;p.R621C                                                                                                                                                                                                                                                                                                                                                                                                                                                                                                                                                                                                             | 1.391 | 7.35E-05 | 6.90E-05 | 2.79E-05        | Fam102_f_m_aM       | 0/0;0/1;0/1         |
| chr9 | 136517898 | 136517898 | G | A | NOTCH1  | exonic | nonsynonymous SNV    | NOTCH1:NM_017617:exon8:c.C1295T;p.T432M                                                                                                                                                                                                                                                                                                                                                                                                                                                                                                                                                                                                              | 1.121 | 0.0001   | 0.0005   | 0.0001          | Fam62_f_m_aM_aM     | 0/0;0/1;0/1;0/1     |
| chr9 | 137010275 | 137010275 | C | T | ABCA2   | exonic | nonsynonymous SNV    | ABCA2:NM_001606:exon41:c.G6271A;p.G2091S,ABCA2:N<br>M_212533:exon41:c.G6361A;p.G2121S<br>ABCA2:NM_001606:exon35:c.T5408C;p.M1803T,ABCA2:N<br>M_212533:exon35:c.T5498C;p.M1833T<br>ABCA2:NM_001606:exon34:c.C5304G;p.I1768M,ABCA2:N<br>M_212533:exon34:c.C5394G;p.I1798M                                                                                                                                                                                                                                                                                                                                                                              | 1.718 |          | 8.77E-05 | 6.98E-06        | Fam78_f_m_aF_uM     | 0/1;0/0;0/1;0/1     |
| chr9 | 137011971 | 137011971 | A | G | ABCA2   | exonic | nonsynonymous SNV    | ABCA2:NM_001606:exon35:c.T5408C;p.M1803T,ABCA2:N<br>M_212533:exon35:c.T5498C;p.M1833T<br>ABCA2:NM_001606:exon34:c.C5304G;p.I1768M,ABCA2:N<br>M_212533:exon34:c.C5394G;p.I1798M                                                                                                                                                                                                                                                                                                                                                                                                                                                                       | 1.842 |          | 4.56E-05 | 4.19E-05        | Fam68_f_m_aF_uF_uM  | 0/0;0/1;0/1;0/1;0/0 |
| chr9 | 137012158 | 137012158 | G | C | ABCA2   | exonic | nonsynonymous SNV    | ABCA2:NM_001606:exon32:c.G5174A;p.R1725H,ABCA2:N<br>M_212533:exon32:c.G5264A;p.R1755H<br>ABCA2:NM_001606:exon32:c.C5129T;p.S1710L,ABCA2:NM<br>_212533:exon32:c.C5219T;p.S1740L                                                                                                                                                                                                                                                                                                                                                                                                                                                                       | 1.622 |          | 1.15E-05 |                 | Fam7_f_m_aM_aM_uM   | 0/1;0/0;0/1;0/1;0/0 |
| chr9 | 137012498 | 137012498 | C | T | ABCA2   | exonic | nonsynonymous SNV    | ABCA2:NM_001606:exon32:c.G5174A;p.R1725H,ABCA2:N<br>M_212533:exon32:c.G5264A;p.R1755H<br>ABCA2:NM_001606:exon32:c.C5129T;p.S1710L,ABCA2:NM<br>_212533:exon32:c.C5219T;p.S1740L                                                                                                                                                                                                                                                                                                                                                                                                                                                                       | 1.856 |          | 6.58E-05 |                 | Fam71_f_m_aF        | 0/1;0/0;0/1         |
| chr9 | 137012543 | 137012543 | G | A | ABCA2   | exonic | nonsynonymous SNV    | ABCA2:NM_001606:exon32:c.C5129T;p.S1710L,ABCA2:NM<br>_212533:exon32:c.C5219T;p.S1740L                                                                                                                                                                                                                                                                                                                                                                                                                                                                                                                                                                | 1.209 |          | 0.0002   |                 | Fam55_f_m_aM_aM_dM  | 0/0;0/1;0/0;0/1;0/1 |
| chr9 | 137013144 | 137013144 | C | A | ABCA2   | exonic | nonsynonymous SNV    | ABCA2:NM_001606:exon30:c.G4725T;p.M1575I,ABCA2:N<br>M_212533:exon30:c.G4815T;p.M1605I                                                                                                                                                                                                                                                                                                                                                                                                                                                                                                                                                                | 1.563 |          | 1.27E-05 |                 | Fam10_f_m_aM_uF     | 0/0;0/1;0/1;0/0     |
| chr9 | 137017309 | 137017309 | C | A | ABCA2   | exonic | nonsynonymous SNV    | ABCA2:NM_001606:exon18:c.G2440T;p.A814S,ABCA2:NM<br>_212533:exon18:c.G2530T;p.A844S<br>ABCA2:NM_001606:exon17:c.G2254A;p.A752T,ABCA2:NM<br>_212533:exon17:c.G2344A;p.A782T                                                                                                                                                                                                                                                                                                                                                                                                                                                                           | 2.041 |          |          |                 | Fam36_f_m_aM_uM     | 0/0;0/1;0/1;0/0     |
| chr9 | 137017650 | 137017650 | C | T | ABCA2   | exonic | nonsynonymous SNV    | ABCA2:NM_001606:exon17:c.G2254A;p.A752T,ABCA2:NM<br>_212533:exon17:c.G2344A;p.A782T                                                                                                                                                                                                                                                                                                                                                                                                                                                                                                                                                                  | 2.197 |          |          |                 | Fam94_f_m_aM        | 0/1;0/0;0/1         |
| chr9 | 137031072 | 137031072 | G | A | FUT7    | exonic | nonsynonymous SNV    | FUT7:NM_004479:exon2:c.C667T;p.R223C                                                                                                                                                                                                                                                                                                                                                                                                                                                                                                                                                                                                                 | 1.123 | 7.34E-05 | 6.80E-05 | 2.09E-05        | Fam75_f_m_aM        | 0/1;0/0;0/1         |
| chr9 | 137070393 | 137070393 | C | G | SAPCD2  | exonic | nonsynonymous SNV    | SAPCD2:NM_178448:exon1:c.G68C;p.G23A                                                                                                                                                                                                                                                                                                                                                                                                                                                                                                                                                                                                                 | 1.131 |          |          |                 | Fam4_f_m_aM         | 0/1;0/0;0/1         |
| chr9 | 137189119 | 137189119 | G | A | SSNA1   | exonic | nonsynonymous SNV    | SSNA1:NM_003731:exon2:c.G106A;p.E36K                                                                                                                                                                                                                                                                                                                                                                                                                                                                                                                                                                                                                 | 1.682 |          |          |                 | Fam27_f_m_aF_uM_uM  | 0/0;0/1;0/1;0/1;0/0 |
| chr9 | 137834904 | 137834904 | A | C | EHMT1   | exonic | nonsynonymous SNV    | EHMT1:NM_001354263:exon27:c.A3827C;p.E1276A,EHMT<br>1:NM_024757:exon27:c.A3848C;p.E1283A<br>CACNA1B:NM_000718:exon19:c.C2899T;p.R967W,CACNA1<br>B:NM_001243812:exon19:c.C2899T;p.R967W                                                                                                                                                                                                                                                                                                                                                                                                                                                               | 1.451 |          | 0.0002   | 8.38E-05        | Fam68_f_m_aF_uF_uM  | 0/0;0/1;0/1;0/1;0/0 |
| chr9 | 138023642 | 138023642 | C | T | CACNA1B | exonic | nonsynonymous SNV    | CACNA1B:NM_000718:exon19:c.C2899T;p.R967W,CACNA1<br>B:NM_001243812:exon19:c.C2899T;p.R967W                                                                                                                                                                                                                                                                                                                                                                                                                                                                                                                                                           | 1.092 | 7.74E-05 | 4.04E-05 | 4.25E-05        | Fam66_f_m_aM        | 0/0;0/1;0/1         |
| chrX | 10067293  | 10067293  | C | G | WWC3    | exonic | nonsynonymous SNV    | WWC3:NM_015691:exon3:c.C23G;p.T8S                                                                                                                                                                                                                                                                                                                                                                                                                                                                                                                                                                                                                    | 1.009 |          | 1.57E-05 |                 | Fam69_f_m_aM        | 0/0;0/1;1/1         |
| chrX | 12888602  | 12888602  | G | A | TLR7    | exonic | nonsynonymous SNV    | TLR7:NM_016562:exon3:c.G3094A;p.A1032T<br>GPM6B:NM_001001994:exon6:c.G649A;p.V217I,GPM6B:N<br>M_001318729:exon6:c.G649A;p.V217I,GPM6B:NM_00527<br>8:exon6:c.G706A;p.V236I,GPM6B:NM_001001995:exon7:c.<br>.G826A;p.V276I,GPM6B:NM_001001996:exon7:c.G826A;p.<br>V276I                                                                                                                                                                                                                                                                                                                                                                                 | 1.499 | 0.0004   | 0.0007   | 0.0006          | Fam115_f_m_aF_aM_aF | 0/0;0/1;0/1;0/0;0/0 |
| chrX | 13776249  | 13776249  | C | T | GPM6B   | exonic | nonsynonymous SNV    | GPM6B:NM_001001994:exon6:c.G649A;p.V217I,GPM6B:N<br>M_001318729:exon6:c.G649A;p.V217I,GPM6B:NM_00527<br>8:exon6:c.G706A;p.V236I,GPM6B:NM_001001995:exon7:c.<br>.G826A;p.V276I,GPM6B:NM_001001996:exon7:c.G826A;p.<br>V276I                                                                                                                                                                                                                                                                                                                                                                                                                           | 1.433 | 0.0004   | 0.0004   | 0.0002          | Fam90_f_m_aF_dM     | 0/0;0/1;0/1;0/0     |
| chrX | 18941608  | 18941608  | A | C | PHKA2   | exonic | nonsynonymous SNV    | PHKA2:NM_000292:exon8:c.T785G;p.I262S                                                                                                                                                                                                                                                                                                                                                                                                                                                                                                                                                                                                                | 1.858 | 0.0004   | 0.0003   | 0.0005          | Fam66_f_m_aM        | 0/0;0/1;1/1         |

|      |           |           |   |   |          |        |                   |                                                                                                                                                                                                                                                                                                                                                                                                                                                                                                                                                                                                                                                                                                                                                                                                                   |       |        |          |          |                        |                         |                 |
|------|-----------|-----------|---|---|----------|--------|-------------------|-------------------------------------------------------------------------------------------------------------------------------------------------------------------------------------------------------------------------------------------------------------------------------------------------------------------------------------------------------------------------------------------------------------------------------------------------------------------------------------------------------------------------------------------------------------------------------------------------------------------------------------------------------------------------------------------------------------------------------------------------------------------------------------------------------------------|-------|--------|----------|----------|------------------------|-------------------------|-----------------|
| chrX | 18990970  | 18990970  | T | C | ADGRG2   | exonic | nonsynonymous SNV | ADGRG2:NM_001184835:exon26:c.A2834G:p.K945R,ADGRG2:NM_001079860:exon27:c.A2882G:p.K961R,ADGRG2:NM_001184836:exon27:c.A2876G:p.K959R,ADGRG2:NM_001184837:exon27:c.A2858G:p.K953R,ADGRG2:NM_001079859:exon28:c.A2906G:p.K969R,ADGRG2:NM_001184833:exon28:c.A2900G:p.K967R,ADGRG2:NM_001184834:exon28:c.A2795G:p.K932R,ADGRG2:NM_001079858:exon29:c.A2948G:p.K983R,ADGRG2:NM_005756:exon29:c.A2939G:p.K980R,ADGRG2:NM_001184835:exon24:c.G2585A:p.R862Q,ADGRG2:NM_001079860:exon25:c.G2633A:p.R878Q,ADGRG2:NM_001184836:exon25:c.G2627A:p.R876Q,ADGRG2:NM_001184837:exon25:c.G2609A:p.R870Q,ADGRG2:NM_001079859:exon26:c.G2657A:p.R886Q,ADGRG2:NM_001184833:exon26:c.G2651A:p.R884Q,ADGRG2:NM_001079858:exon27:c.G2699A:p.R900Q,ADGRG2:NM_001184834:exon27:c.G2699A:p.R900Q,ADGRG2:NM_005756:exon27:c.G2690A:p.R897Q | 1.128 |        |          |          |                        | Fam35_f_m_aF_uM         | 0/0;0/1;0/1;1/1 |
| chrX | 18996068  | 18996068  | C | T | ADGRG2   | exonic | nonsynonymous SNV | ADGRG2:NM_001184835:exon24:c.G2585A:p.R862Q,ADGRG2:NM_001079860:exon25:c.G2633A:p.R878Q,ADGRG2:NM_001184836:exon25:c.G2627A:p.R876Q,ADGRG2:NM_001184837:exon25:c.G2609A:p.R870Q,ADGRG2:NM_001079859:exon26:c.G2657A:p.R886Q,ADGRG2:NM_001184833:exon26:c.G2651A:p.R884Q,ADGRG2:NM_001079858:exon27:c.G2699A:p.R900Q,ADGRG2:NM_001184834:exon27:c.G2699A:p.R900Q,ADGRG2:NM_005756:exon27:c.G2690A:p.R897Q                                                                                                                                                                                                                                                                                                                                                                                                          | 1.349 | 0.0005 | 0.0004   | 0.0001   | Fam123_f_aF            | 0/0;0/1                 |                 |
| chrX | 21655991  | 21655991  | C | T | KLHL34   | exonic | nonsynonymous SNV | KLHL34:NM_153270:exon1:c.G1798A:p.D60N                                                                                                                                                                                                                                                                                                                                                                                                                                                                                                                                                                                                                                                                                                                                                                            | 1.278 |        | 1.60E-05 |          | Fam114_f_m_aM          | 0/0;0/1;1/1             |                 |
| chrX | 22077535  | 22077535  | C | T | PHEX     | exonic | nonsynonymous SNV | PHEX:NM_000444:exon5:c.C496T:p.R166C,PHEX:NM_001282754:exon5:c.C496T:p.R166C                                                                                                                                                                                                                                                                                                                                                                                                                                                                                                                                                                                                                                                                                                                                      | 1.377 |        | 5.24E-05 |          | Fam29_f_m_aF_uM        | 0/0;0/1;0/1;0/0         |                 |
| chrX | 22077544  | 22077544  | G | A | PHEX     | exonic | nonsynonymous SNV | PHEX:NM_000444:exon5:c.G505A:p.V169M,PHEX:NM_001282754:exon5:c.G505A:p.V169M                                                                                                                                                                                                                                                                                                                                                                                                                                                                                                                                                                                                                                                                                                                                      | 1.162 |        | 4.64E-05 | 8.51E-05 | Fam88_f_m_aF           | 0/0;0/1;0/1             |                 |
| chrX | 23785707  | 23785707  | A | G | SAT1     | exonic | nonsynonymous SNV | SAT1:NM_002970:exon6:c.A367G:p.S123G                                                                                                                                                                                                                                                                                                                                                                                                                                                                                                                                                                                                                                                                                                                                                                              | 1.012 | 0.0004 | 7.64E-05 | 2.84E-05 | Fam77_f_m_aM_aF_uM_uFs | 0/0;0/1;1/1;0/1;1/1;0/0 |                 |
| chrX | 41224766  | 41224766  | T | C | USP9X    | exonic | nonsynonymous SNV | USP9X:NM_001039590:exon40:c.T6776C:p.F2259S,USP9X:NM_001039591:exon40:c.T6776C:p.F2259S                                                                                                                                                                                                                                                                                                                                                                                                                                                                                                                                                                                                                                                                                                                           | 1.563 |        |          |          | Fam91_m_aM_dM_aM_dM    | 0/1;1/1;1/1;1/1;1/1     |                 |
| chrX | 41474066  | 41474066  | C | G | NYX      | exonic | nonsynonymous SNV | NYX:NM_022567:exon2:c.C613G:p.L205V,KDM6A:NM_001291415:exon9:c.A660T:p.K220N,KDM6A:NM_001291416:exon9:c.A660T:p.K220N,KDM6A:NM_001291417:exon9:c.A660T:p.K220N,KDM6A:NM_001291418:exon9:c.A660T:p.K220N,KDM6A:NM_021140:exon9:c.A660T:p.K220N                                                                                                                                                                                                                                                                                                                                                                                                                                                                                                                                                                     | 1.237 |        |          |          | Fam51_f_m_aM_uF        | 0/0;0/1;1/1;0/0         |                 |
| chrX | 45051714  | 45051714  | A | T | KDM6A    | exonic | nonsynonymous SNV | KDM6A:NM_001291415:exon9:c.A660T:p.K220N,KDM6A:NM_001291416:exon9:c.A660T:p.K220N,KDM6A:NM_001291417:exon9:c.A660T:p.K220N,KDM6A:NM_001291418:exon9:c.A660T:p.K220N,KDM6A:NM_021140:exon9:c.A660T:p.K220N                                                                                                                                                                                                                                                                                                                                                                                                                                                                                                                                                                                                         | 1.884 |        | 4.37E-05 | 1.89E-05 | Fam118_f_m_aM_aF_uM    | 0/0;0/1;1/1;0/0;0/0     |                 |
| chrX | 47202995  | 47202995  | T | C | UBA1     | exonic | nonsynonymous SNV | UBA1:NM_003334:exon12:c.T1286C:p.L429P,UBA1:NM_153280:exon12:c.T1286C:p.L429P                                                                                                                                                                                                                                                                                                                                                                                                                                                                                                                                                                                                                                                                                                                                     | 1.484 |        | 1.55E-05 |          | Fam12_f_m_aM_uM_aM     | 0/0;0/1;1/1;1/1;1/1     |                 |
| chrX | 47626101  | 47626101  | G | A | CFP      | exonic | nonsynonymous SNV | CFP:NM_001145252:exon8:c.C1201T:p.R401C,CFP:NM_002621:exon9:c.C1201T:p.R401C                                                                                                                                                                                                                                                                                                                                                                                                                                                                                                                                                                                                                                                                                                                                      | 1.914 |        | 2.33E-05 |          | Fam53_f_m_aM           | 0/0;0/1;1/1             |                 |
| chrX | 48601844  | 48601844  | G | T | WDR13    | exonic | nonsynonymous SNV | WDR13:NM_001166426:exon5:c.G616T:p.G206W,WDR13:NM_017883:exon6:c.G892T:p.G298W,WDR13:NM_001347217:exon7:c.G892T:p.G298W,WDR13:NM_001347219:exon7:c.G616T:p.G206W                                                                                                                                                                                                                                                                                                                                                                                                                                                                                                                                                                                                                                                  | 2.355 | 0.0001 | 0.0002   | 8.46E-05 | Fam15_f_m_aM_aM        | 0/0;0/1;0/0;1/1         |                 |
| chrX | 48808106  | 48808106  | C | T | HDAC6    | exonic | nonsynonymous SNV | HDAC6:NM_001321226:exon9:c.C706T:p.R236C,HDAC6:NM_001321227:exon9:c.C706T:p.R236C,HDAC6:NM_001321228:exon9:c.C706T:p.R236C,HDAC6:NM_001321229:exon9:c.C706T:p.R236C,HDAC6:NM_006044:exon9:c.C706T:p.R236C,HDAC6:NM_001321225:exon10:c.C748T:p.R250C                                                                                                                                                                                                                                                                                                                                                                                                                                                                                                                                                               | 2.352 |        |          |          | Fam56_f_m_aF_aM        | 0/0;0/1;0/1;0/0         |                 |
| chrX | 50086401  | 50086401  | G | A | CLCN5    | exonic | nonsynonymous SNV | CLCN5:NM_000084:exon8:c.G878A:p.R293H,CLCN5:NM_01282163:exon8:c.G938A:p.R313H,CLCN5:NM_001127898:exon11:c.G1088A:p.R363H,CLCN5:NM_001127899:exon11:c.G1088A:p.R363H                                                                                                                                                                                                                                                                                                                                                                                                                                                                                                                                                                                                                                               | 1.583 | 0.0001 |          | 2.86E-05 | Fam119_f_m_aM_aM       | 0/0;0/1;1/1;0/0         |                 |
| chrX | 55452768  | 55452768  | C | T | MAGEH1   | exonic | nonsynonymous SNV | MAGEH1:NM_014061:exon1:c.C394T:p.P132S                                                                                                                                                                                                                                                                                                                                                                                                                                                                                                                                                                                                                                                                                                                                                                            | 1.534 |        |          |          | Fam92_f_m_aM_raM       | 0/0;0/1;1/1;0/0         |                 |
| chrX | 65518271  | 65518271  | G | C | LAS1L    | exonic | nonsynonymous SNV | LAS1L:NM_001170650:exon10:c.C1466G:p.S489C,LAS1L:NM_001170649:exon11:c.C1592G:p.S531C,LAS1L:NM_031206:exon12:c.C1643G:p.S548C                                                                                                                                                                                                                                                                                                                                                                                                                                                                                                                                                                                                                                                                                     | 1.057 |        |          |          | Fam121_f_m_aF_aM       | 0/0;0/1;0/1;1/1         |                 |
| chrX | 65729651  | 65729651  | G | A | MSN      | exonic | nonsynonymous SNV | MSN:NM_002444:exon4:c.G406A:p.D136N                                                                                                                                                                                                                                                                                                                                                                                                                                                                                                                                                                                                                                                                                                                                                                               | 1.9   |        | 0.0003   |          | Fam92_f_m_aM_raM       | 0/0;0/1;1/1;0/0         |                 |
| chrX | 69529693  | 69529693  | T | C | FAM155B  | exonic | nonsynonymous SNV | FAM155B:NM_015686:exon3:c.T1156C:p.F386L,GDPD2:NM_001171191:exon10:c.C979T:p.R327C,GDPD2:NM_001171193:exon11:c.C979T:p.R327C,GDPD2:NM_001171192:exon12:c.C1216T:p.R406C,GDPD2:NM_017711:exon12:c.C1216T:p.R406C                                                                                                                                                                                                                                                                                                                                                                                                                                                                                                                                                                                                   | 1.201 | 0.0001 | 9.97E-05 | 6.69E-05 | Fam34_f_m_aM_uF        | 0/0;0/1;1/1;0/0         |                 |
| chrX | 70429972  | 70429972  | C | T | GDPD2    | exonic | nonsynonymous SNV | GDPD2:NM_001171191:exon10:c.C979T:p.R327C,GDPD2:NM_001171193:exon11:c.C979T:p.R327C,GDPD2:NM_001171192:exon12:c.C1216T:p.R406C,GDPD2:NM_017711:exon12:c.C1216T:p.R406C                                                                                                                                                                                                                                                                                                                                                                                                                                                                                                                                                                                                                                            | 1.317 |        |          |          | Fam33_f_m_aM_uM        | 0/0;0/1;1/1;1/1         |                 |
| chrX | 71129381  | 71129381  | A | C | MED12    | exonic | nonsynonymous SNV | MED12:NM_005120:exon26:c.A3643C:p.I1215L                                                                                                                                                                                                                                                                                                                                                                                                                                                                                                                                                                                                                                                                                                                                                                          | 2.151 |        |          |          | Fam10_f_m_aM_uF        | 0/0;0/0;0/1;0/0         |                 |
| chrX | 71224395  | 71224395  | C | T | GJB1     | exonic | nonsynonymous SNV | GJB1:NM_000166:exon2:c.C688T:p.R230C,GJB1:NM_001097642:exon2:c.C688T:p.R230C                                                                                                                                                                                                                                                                                                                                                                                                                                                                                                                                                                                                                                                                                                                                      | 1.252 | 0.0002 | 0.0002   | 0.0002   | Fam12_f_m_aM_uM_aM     | 0/0;0/1;1/1;0/0;1/1     |                 |
| chrX | 75424702  | 75424702  | A | T | ZDHHC15  | exonic | nonsynonymous SNV | ZDHHC15:NM_001146256:exon7:c.T659A:p.I220N,ZDHHC15:NM_144969:exon8:c.T686A:p.I229N                                                                                                                                                                                                                                                                                                                                                                                                                                                                                                                                                                                                                                                                                                                                | 1.068 |        |          |          | Fam76_f_m_aM_uM        | 0/0;0/1;1/1;1/1         |                 |
| chrX | 78755174  | 78755174  | G | A | LPAR4    | exonic | nonsynonymous SNV | LPAR4:NM_005296:exon2:c.G305A:p.R102H,LPAR4:NM_001278000:exon5:c.G305A:p.R102H                                                                                                                                                                                                                                                                                                                                                                                                                                                                                                                                                                                                                                                                                                                                    | 1.256 |        | 1.55E-05 |          | Fam56_f_m_aF_aM        | 0/0;0/1;0/1;0/0         |                 |
| chrX | 80691862  | 80691862  | C | T | BRWD3    | exonic | nonsynonymous SNV | BRWD3:NM_153252:exon30:c.G3442A:p.E1148K                                                                                                                                                                                                                                                                                                                                                                                                                                                                                                                                                                                                                                                                                                                                                                          | 2.003 |        |          |          | Fam113_f_m_aF_raM_uF   | 1/1;0/0;0/1;1/1;0/1     |                 |
| chrX | 80717678  | 80717678  | C | G | BRWD3    | exonic | nonsynonymous SNV | BRWD3:NM_153252:exon19:c.G2126C:p.R709T                                                                                                                                                                                                                                                                                                                                                                                                                                                                                                                                                                                                                                                                                                                                                                           | 2.13  |        |          |          | Fam72_f_m_aF_uF        | 0/0;0/1;0/1;0/1         |                 |
| chrX | 100407796 | 100407796 | C | T | PCDH19   | exonic | nonsynonymous SNV | PCDH19:NM_001105243:exon1:c.G802A:p.G268S,PCDH19:NM_001184880:exon1:c.G802A:p.G268S,PCDH19:NM_020766:exon1:c.G802A:p.G268S                                                                                                                                                                                                                                                                                                                                                                                                                                                                                                                                                                                                                                                                                        | 2.367 |        |          |          | Fam118_f_m_aM_aF_uM    | 0/0;0/1;1/1;0/1;1/1     |                 |
| chrX | 101241790 | 101241790 | C | T | DRP2     | exonic | nonsynonymous SNV | DRP2:NM_001171184:exon5:c.C448T:p.R150W,DRP2:NM_001939:exon7:c.C682T:p.R228W                                                                                                                                                                                                                                                                                                                                                                                                                                                                                                                                                                                                                                                                                                                                      | 1.237 | 0.0001 | 1.55E-05 | 9.50E-06 | Fam56_f_m_aF_aM        | 0/0;0/1;0/1;0/0         |                 |
| chrX | 105767516 | 105767516 | A | G | IL1RAPL2 | exonic | nonsynonymous SNV | IL1RAPL2:NM_017416:exon11:c.A1916G:p.H639R                                                                                                                                                                                                                                                                                                                                                                                                                                                                                                                                                                                                                                                                                                                                                                        | 1.063 | 0.0003 | 4.64E-05 | 5.71E-05 | Fam91_m_aM_dM_aM_dM    | 0/1;1/1;1/1;1/1;1/1     |                 |
| chrX | 106928284 | 106928284 | T | C | CLDN2    | exonic | nonsynonymous SNV | CLDN2:NM_001171092:exon2:c.T56C:p.L195,CLDN2:NM_01171095:exon2:c.T56C:p.L195,CLDN2:NM_020384:exon2:c.T56C:p.L195                                                                                                                                                                                                                                                                                                                                                                                                                                                                                                                                                                                                                                                                                                  | 1.193 | 0.0002 | 0.0006   | 0.0001   | Fam39_f_m_aM           | 0/0;0/1;1/1             |                 |

|      |           |           |   |   |         |        |                   |                                                                                                                                                                                                                                                                                                                                                                                                                                                                                                                                                                                                                                                                                              |       |        |          |          |                     |                     |
|------|-----------|-----------|---|---|---------|--------|-------------------|----------------------------------------------------------------------------------------------------------------------------------------------------------------------------------------------------------------------------------------------------------------------------------------------------------------------------------------------------------------------------------------------------------------------------------------------------------------------------------------------------------------------------------------------------------------------------------------------------------------------------------------------------------------------------------------------|-------|--------|----------|----------|---------------------|---------------------|
| chrX | 106986166 | 106986166 | G | T | MORC4   | exonic | nonsynonymous SNV | MORC4:NM_001085354:exon4:c.C343A;p.Q115K,MORC4:NM_024657:exon4:c.C343A;p.Q115K                                                                                                                                                                                                                                                                                                                                                                                                                                                                                                                                                                                                               | 1.083 | 0.0002 | 0.0001   | 4.75E-05 | Fam105_f_m_aM       | 0/0;0/1;1/1         |
| chrX | 106986167 | 106986167 | G | C | MORC4   | exonic | nonsynonymous SNV | MORC4:NM_001085354:exon4:c.C342G;p.S114R,MORC4:NM_024657:exon4:c.C342G;p.S114R                                                                                                                                                                                                                                                                                                                                                                                                                                                                                                                                                                                                               | 1.151 | 0.0002 | 0.0001   | 4.75E-05 | Fam105_f_m_aM       | 0/0;0/1;1/1         |
| chrX | 109665485 | 109665485 | T | C | ACSL4   | exonic | nonsynonymous SNV | ACSL4:NM_001318509:exon12:c.A1448G;p.Y483C,ACSL4:NM_001318510:exon12:c.A1325G;p.Y442C,ACSL4:NM_004458:exon12:c.A1325G;p.Y442C,ACSL4:NM_022977:exon13:c.A1448G;p.Y483C                                                                                                                                                                                                                                                                                                                                                                                                                                                                                                                        | 1.635 | 0.0007 | 0.0007   | 0.0005   | Fam9_f_m_aM_dM_uF   | 0/0;0/1;1/1;1/1;0/1 |
| chrX | 110317627 | 110317627 | G | A | AMMECR1 | exonic | nonsynonymous SNV | AMMECR1:NM_001025580:exon1:c.C445T;p.R149W,AMMECR1:NM_015365:exon1:c.C445T;p.R149W,AMMECR1:NM_001171689:exon3:c.C76T;p.R26W                                                                                                                                                                                                                                                                                                                                                                                                                                                                                                                                                                  | 1.764 |        |          |          | Fam81_f_m_aM_uM     | 0/0;0/1;1/1;0/0     |
| chrX | 111194411 | 111194411 | G | C | PAK3    | exonic | nonsynonymous SNV | PAK3:NM_001128167:exon11:c.G1103C;p.C368S,PAK3:NM_001128172:exon11:c.G1166C;p.C389S,PAK3:NM_001128166:exon12:c.G1103C;p.C368S,PAK3:NM_001324325:exon12:c.G1103C;p.C368S,PAK3:NM_001324326:exon12:c.G1103C;p.C368S,PAK3:NM_001324330:exon12:c.G1103C;p.C368S,PAK3:NM_001324328:exon13:c.G1148C;p.C383S,PAK3:NM_001324331:exon13:c.G1103C;p.C368S,PAK3:NM_001324332:exon13:c.G1103C;p.C368S,PAK3:NM_001324327:exon14:c.G1148C;p.C383S,PAK3:NM_001324332:exon14:c.G1103C;p.C368S,PAK3:NM_001324333:exon14:c.G1148C;p.C383S,PAK3:NM_002578:exon14:c.G1103C;p.C368S,PAK3:NM_001128173:exon15:c.G1148C;p.C383S,PAK3:NM_001324329:exon15:c.G1148C;p.C383S,PAK3:NM_001128168:exon16:c.G1211C;p.C404S | 3.521 |        |          |          | Fam79_f_m_aM_uM     | 0/0;0/1;1/1;1/1     |
| chrX | 129565827 | 129565827 | G | A | OCRL    | exonic | nonsynonymous SNV | OCRL:NM_000276:exon13:c.G1300A;p.E434K,OCRL:NM_01318784:exon13:c.G1303A;p.E435K,OCRL:NM_001587:exon13:c.G1300A;p.E434K                                                                                                                                                                                                                                                                                                                                                                                                                                                                                                                                                                       | 2.017 |        |          |          | Fam56_f_m_aF_aM     | 0/0;0/1;0/0;1/1     |
| chrX | 129788035 | 129788035 | G | A | SASH3   | exonic | nonsynonymous SNV | SASH3:NM_018990:exon2:c.G118A;p.V40M                                                                                                                                                                                                                                                                                                                                                                                                                                                                                                                                                                                                                                                         | 1.296 |        | 3.11E-05 | 5.83E-05 | Fam23_f_m_aM_dF_uFs | 0/0;0/1;1/1;0/1;0/1 |
| chrX | 129793748 | 129793748 | G | C | SASH3   | exonic | nonsynonymous SNV | SASH3:NM_018990:exon8:c.G1059C;p.E353D                                                                                                                                                                                                                                                                                                                                                                                                                                                                                                                                                                                                                                                       | 1.248 |        |          |          | Fam5_f_m_aM         | 0/0;0/1;1/1         |
| chrX | 134413584 | 134413584 | A | T | PHF6    | exonic | nonsynonymous SNV | PHF6:NM_001015877:exon6:c.A512T;p.N171I,PHF6:NM_032335:exon6:c.A515T;p.N172I,PHF6:NM_032458:exon6:c.A512T;p.N171I                                                                                                                                                                                                                                                                                                                                                                                                                                                                                                                                                                            | 1.325 |        |          |          | Fam39_f_m_aM        | 0/0;0/1;1/1         |
| chrX | 135552001 | 135552001 | G | A | INTS6L  | exonic | nonsynonymous SNV | INTS6L:NM_001351601:exon8:c.G914A;p.R305Q,INTS6L:NM_001351603:exon8:c.G914A;p.R305Q,INTS6L:NM_001351604:exon8:c.G914A;p.R305Q,INTS6L:NM_001351605:exon8:c.G914A;p.R305Q,INTS6L:NM_001351606:exon8:c.G320A;p.R107Q,INTS6L:NM_182540:exon8:c.G914A;p.R305Q                                                                                                                                                                                                                                                                                                                                                                                                                                     | 1.378 |        | 0.0001   |          | Fam21_f_m_aM_uM     | 0/0;0/1;1/1;0/0     |
| chrX | 139802242 | 139802242 | A | C | ATP11C  | exonic | nonsynonymous SNV | ATP11C:NM_001010986:exon7:c.T662G;p.L221R,ATP11C:NM_001353811:exon7:c.T653G;p.L218R,ATP11C:NM_001353812:exon7:c.T653G;p.L218R,ATP11C:NM_173694:exon7:c.T662G;p.L221R,ATP11C:NM_001353810:exon8:c.T653G;p.L218R                                                                                                                                                                                                                                                                                                                                                                                                                                                                               | 1.623 |        | 7.62E-05 | 1.89E-05 | Fam47_f_m_aM        | 0/0;0/1;1/1         |
| chrX | 153725316 | 153725316 | G | A | ABCD1   | exonic | nonsynonymous SNV | ABCD1:NM_000033:exon1:c.G50A;p.R17H                                                                                                                                                                                                                                                                                                                                                                                                                                                                                                                                                                                                                                                          | 1.404 | 0.0001 | 0.0002   | 0.0001   | Fam44_f_m_aM_uF     | 0/0;0/1;1/1;0/0     |
| chrX | 153785963 | 153785963 | G | A | IDH3G   | exonic | nonsynonymous SNV | IDH3G:NM_004135:exon13:c.C1091T;p.P364L                                                                                                                                                                                                                                                                                                                                                                                                                                                                                                                                                                                                                                                      | 1.241 |        |          | 9.41E-06 | Fam92_f_m_aM_raM    | 0/0;0/0;0/0;1/1     |
| chrX | 153905849 | 153905849 | G | A | AVPR2   | exonic | nonsynonymous SNV | AVPR2:NM_000054:exon3:c.G343A;p.V115M,AVPR2:NM_001146151:exon3:c.G343A;p.V115M                                                                                                                                                                                                                                                                                                                                                                                                                                                                                                                                                                                                               | 1.399 | 0.001  | 4.11E-05 | 2.80E-05 | Fam51_f_m_aM_uF     | 0/0;0/1;1/1;0/1     |
| chrX | 153951650 | 153951650 | G | A | HCFC1   | exonic | nonsynonymous SNV | HCFC1:NM_005334:exon21:c.C5318T;p.A1773V                                                                                                                                                                                                                                                                                                                                                                                                                                                                                                                                                                                                                                                     | 1.45  |        |          |          | Fam53_f_m_aM        | 0/0;0/1;1/1         |
| chrX | 154442150 | 154442150 | C | T | GDI1    | exonic | nonsynonymous SNV | GDI1:NM_001493:exon9:c.C1031T;p.A344V                                                                                                                                                                                                                                                                                                                                                                                                                                                                                                                                                                                                                                                        | 2.277 |        |          |          | Fam39_f_m_aM        | 0/0;0/1;1/1         |
| chrX | 154450310 | 154450310 | C | G | FAM50A  | exonic | nonsynonymous SNV | FAM50A:NM_004699:exon12:c.C1002G;p.D334E                                                                                                                                                                                                                                                                                                                                                                                                                                                                                                                                                                                                                                                     | 1.301 |        |          |          | Fam7_f_m_aM_aM_uM   | 0/0;0/1;1/1;1/1;1/1 |
| chrX | 155046562 | 155046562 | G | A | FUNDC2  | exonic | nonsynonymous SNV | FUNDC2:NM_023934:exon3:c.G338A;p.G113E                                                                                                                                                                                                                                                                                                                                                                                                                                                                                                                                                                                                                                                       | 1.027 |        |          |          | Fam20_f_m_aM_uF     | 0/0;0/1;1/1;0/0     |
| chrX | 155077198 | 155077198 | A | G | BRCC3   | exonic | nonsynonymous SNV | BRCC3:NM_001018055:exon4:c.A224G;p.H75R,BRCC3:NM_001242640:exon4:c.A227G;p.H76R,BRCC3:NM_024332:exon4:c.A224G;p.H75R                                                                                                                                                                                                                                                                                                                                                                                                                                                                                                                                                                         | 2.221 |        | 1.56E-05 | 9.45E-06 | Fam16_f_m_aM_aM     | 0/0;0/1;1/1;1/1     |
